# Supplementary material for: Emergence of immune escape at dominant SARS-CoV-2 killer T-cell epitope
Source: bioRxiv or medRxiv preprint supplement (doi:10.1101/2021.06.21.21259010), 2021-07-14
Supplement: Supplementary file [file media-1.pdf]

## **COG-UK consortium names and affiliations**

**Funding acquisition, leadership, supervision, metadata curation, project administration, samples, logistics, Sequencing, analysis, and Software and analysis tools:**

Thomas R Connor<sup>33,34</sup>, and Nicholas J Loman<sup>15</sup>.

**Leadership, supervision, sequencing, analysis, funding acquisition, metadata curation, project administration, samples, logistics, and visualisation:**

Samuel C Robson<sup>68</sup>.

**Leadership, supervision, project administration, visualisation, samples, logistics, metadata curation and software and analysis tools:**

Tanya Golubchik<sup>27</sup>.

**Leadership, supervision, metadata curation, project administration, samples, logistics sequencing and analysis:**

M. Estee Torok<sup>8,10</sup>.

**Project administration, metadata curation, samples, logistics, sequencing, analysis, and software and analysis tools:**

William L Hamilton<sup>8,10</sup>.

**Leadership, supervision, samples logistics, project administration, funding acquisition sequencing and analysis:**

David Bonsall<sup>27</sup>.

**Leadership and supervision, sequencing, analysis, funding acquisition, visualisation and software and analysis tools:**

Ali R Awan<sup>74</sup>.

**Leadership and supervision, funding acquisition, sequencing, analysis, metadata curation, samples and logistics:**

Sally Corden<sup>33</sup>.

**Leadership supervision, sequencing analysis, samples, logistics, and metadata curation:** Ian Goodfellow<sup>11</sup>.

**Leadership, supervision, sequencing, analysis, samples, logistics, and Project administration:**

Darren L Smith<sup>60,61</sup>.

**Project administration, metadata curation, samples, logistics, sequencing and analysis:**

Martin D Curran<sup>14</sup>, and Surendra Parmar<sup>14</sup>.

**Samples, logistics, metadata curation, project administration sequencing and analysis:**

James G Shepherd<sup>21</sup>.

**Sequencing, analysis, project administration, metadata curation and software and analysis tools:**

Matthew D Parker <sup>38</sup>.

**Leadership, supervision, funding acquisition, samples, logistics, and metadata curation:**

Catherine Moore <sup>33</sup>.

**Leadership, supervision, metadata curation, samples, logistics, sequencing and analysis:**

Derek J Fairley<sup>6,88</sup>, Matthew W Loose <sup>54</sup>, and Joanne Watkins <sup>33</sup>.

**Metadata curation, sequencing, analysis, leadership, supervision and software and analysis tools:**

Matthew Bull <sup>33</sup>, and Sam Nicholls <sup>15</sup>.

**Leadership, supervision, visualisation, sequencing, analysis and software and analysis tools:**

David M Aanensen <sup>1,30</sup>.

**Sequencing, analysis, samples, logistics, metadata curation, and visualisation:**

Sharon Glaysher <sup>70</sup>.

**Metadata curation, sequencing, analysis, visualisation, software and analysis tools:**

Matthew Bashton <sup>60</sup>, and Nicole Pacchiarini <sup>33</sup>.

**Sequencing, analysis, visualisation, metadata curation, and software and analysis tools:**

Anthony P Underwood <sup>1,30</sup>.

**Funding acquisition, leadership, supervision and project administration:**

Thushan I de Silva <sup>38</sup>, and Dennis Wang <sup>38</sup>.

**Project administration, samples, logistics, leadership and supervision:**

Monique Andersson<sup>28</sup>, Anoop J Chauhan <sup>70</sup>, Mariateresa de Cesare <sup>26</sup>, Catherine Ludden <sup>1,3</sup>, and Tabitha W Mahungu <sup>91</sup>.

**Sequencing, analysis, project administration and metadata curation:**

Rebecca Dewar <sup>20</sup>, and Martin P McHugh <sup>20</sup>.

**Samples, logistics, metadata curation and project administration:**

Natasha G Jesudason <sup>21</sup>, Kathy K Li MBCh <sup>21</sup>, Rajiv N Shah <sup>21</sup>, and Yusri Taha <sup>66</sup>.

**Leadership, supervision, funding acquisition and metadata curation:**

Kate E Templeton <sup>20</sup>.

**Leadership, supervision, funding acquisition, sequencing and analysis:**

Simon Cottrell <sup>33</sup>, Justin O'Grady <sup>51</sup>, Andrew Rambaut <sup>19</sup>, and Colin P Smith<sup>93</sup>.

**Leadership, supervision, metadata curation, sequencing and analysis:**

Matthew T.G. Holden <sup>87</sup>, and Emma C Thomson <sup>21</sup>.

**Leadership, supervision, samples, logistics and metadata curation:**

Samuel Moses <sup>81,82</sup>.

**Sequencing, analysis, leadership, supervision, samples and logistics:**

Meera Chand <sup>7</sup>, Chrystala Constantinidou <sup>71</sup>, Alistair C Darby <sup>46</sup>, Julian A Hiscox <sup>46</sup>, Steve Paterson <sup>46</sup>, and Meera Unnikrishnan <sup>71</sup>.

**Sequencing, analysis, leadership and supervision and software and analysis tools:**

Andrew J Page <sup>51</sup>, and Erik M Volz <sup>96</sup>.

**Samples, logistics, sequencing, analysis and metadata curation:**

Charlotte J Houldcroft <sup>8</sup>, Aminu S Jahun <sup>11</sup>, James P McKenna <sup>88</sup>, Luke W Meredith <sup>11</sup>, Andrew Nelson <sup>61</sup>, Sarojini Pandey <sup>72</sup>, and Gregory R Young <sup>60</sup>.

**Sequencing, analysis, metadata curation, and software and analysis tools:**

Anna Price <sup>34</sup>, Sara Rey <sup>33</sup>, Sunando Roy <sup>41</sup>, Ben Temperton<sup>49</sup>, and Matthew Wyles <sup>38</sup>.

**Sequencing, analysis, metadata curation and visualisation:**

Stefan Rooke<sup>19</sup>, and Sharif Shaaban <sup>87</sup>.

**Visualisation, sequencing, analysis and software and analysis tools:**

Helen Adams <sup>35</sup>, Yann Bourgeois <sup>69</sup>, Katie F Loveson <sup>68</sup>, Áine O'Toole <sup>19</sup>, and Richard Stark <sup>71</sup>.

**Project administration, leadership and supervision:**

Ewan M Harrison <sup>1,3</sup>, David Heyburn <sup>33</sup>, and Sharon J Peacock <sup>2,3</sup>

**Project administration and funding acquisition:**

David Buck <sup>26</sup>, and Michaela John<sup>36</sup>

**Sequencing, analysis and project administration:**

Dorota Jamrozy <sup>1</sup>, and Joshua Quick <sup>15</sup>

**Samples, logistics, and project administration:**

Rahul Batra <sup>78</sup>, Katherine L Bellis <sup>1,3</sup>, Beth Blane <sup>3</sup>, Sophia T Girgis <sup>3</sup>, Angie Green <sup>26</sup>, Anita Justice <sup>28</sup>, Mark Kristiansen <sup>41</sup>, and Rachel J Williams <sup>41</sup>.

**Project administration, software and analysis tools:**

Radoslaw Poplawski<sup>15</sup>.

**Project administration and visualisation:**

Garry P Scarlett <sup>69</sup>.

**Leadership, supervision, and funding acquisition:**

John A Todd <sup>26</sup>, Christophe Fraser <sup>27</sup>, Judith Breuer <sup>40,41</sup>, Sergi Castellano <sup>41</sup>, Stephen L Michell <sup>49</sup>, Dimitris Gramatopoulos <sup>73</sup>, and Jonathan Edgeworth <sup>78</sup>.

#### **Leadership, supervision and metadata curation:**

Gemma L Kay <sup>51</sup>.

#### **Leadership, supervision, sequencing and analysis:**

Ana da Silva Filipe <sup>21</sup>, Aaron R Jeffries <sup>49</sup>, Sascha Ott <sup>71</sup>, Oliver Pybus <sup>24</sup>, David L Robertson <sup>21</sup>, David A Simpson <sup>6</sup>, and Chris Williams <sup>33</sup>.

#### **Samples, logistics, leadership and supervision:**

Cressida Auckland <sup>50</sup>, John Boyes <sup>83</sup>, Samir Dervisevic <sup>52</sup>, Sian Ellard <sup>49,50</sup>, Sonia Goncalves<sup>1</sup>, Emma J Meader <sup>51</sup>, Peter Muir <sup>2</sup>, Husam Osman <sup>95</sup>, Reenesh Prakash <sup>52</sup>, Venkat Sivaprakasam <sup>18</sup>, and Ian B Vipond <sup>2</sup>.

#### **Leadership, supervision and visualisation**

Jane AH Masoli <sup>49,50</sup>.

#### **Sequencing, analysis and metadata curation**

Nabil-Fareed Alikhan <sup>51</sup>, Matthew Carlile <sup>54</sup>, Noel Craine <sup>33</sup>, Sam T Haldenby <sup>46</sup>, Nadine Holmes <sup>54</sup>, Ronan A Lyons <sup>37</sup>, Christopher Moore <sup>54</sup>, Malorie Perry <sup>33</sup>, Ben Warne <sup>80</sup>, and Thomas Williams <sup>19</sup>.

#### **Samples, logistics and metadata curation:**

Lisa Berry <sup>72</sup>, Andrew Bosworth <sup>95</sup>, Julianne Rose Brown <sup>40</sup>, Sharon Campbell <sup>67</sup>, Anna Casey <sup>17</sup>, Gemma Clark <sup>56</sup>, Jennifer Collins <sup>66</sup>, Alison Cox <sup>43,44</sup>, Thomas Davis <sup>84</sup>, Gary Eltringham <sup>66</sup>, Ciriad Evans <sup>38,39</sup>, Clive Graham <sup>64</sup>, Fenella Halstead <sup>18</sup>, Kathryn Ann Harris <sup>40</sup>, Christopher Holmes <sup>58</sup>, Stephanie Hutchings <sup>2</sup>, Miren Iturriza-Gomara <sup>46</sup>, Kate Johnson <sup>38,39</sup>, Katie Jones <sup>72</sup>, Alexander J Keeley <sup>38</sup>, Bridget A Knight <sup>49,50</sup>, Cherian Koshy<sup>90</sup>, Steven Liggett <sup>63</sup>, Hannah Lowe <sup>81</sup>, Anita O Lucaci <sup>46</sup>, Jessica Lynch <sup>25,29</sup>, Patrick C McClure <sup>55</sup>, Nathan Moore <sup>31</sup>, Matilde Mori <sup>25,29,32</sup>, David G Partridge <sup>38,39</sup>, Pinglawathee Madona <sup>43,44</sup>, Hannah M Pymont <sup>2</sup>, Paul Anthony Randell <sup>43,44</sup>, Mohammad Raza <sup>38,39</sup>, Felicity Ryan <sup>81</sup>, Robert Shaw <sup>28</sup>, Tim J Sloan <sup>57</sup>, and Emma Swindells <sup>65</sup>.

#### **Sequencing, analysis, Samples and logistics:**

Alexander Adams <sup>33</sup>, Hibo Asad <sup>33</sup>, Alec Birchley <sup>33</sup>, Tony Thomas Brooks <sup>41</sup>, Giselda Bucca <sup>93</sup>, Ethan Butcher <sup>70</sup>, Sarah L Caddy <sup>13</sup>, Laura G Caller <sup>2,3,12</sup>, Yasmin Chaudhry <sup>11</sup>, Jason Coombes <sup>33</sup>, Michelle Cronin <sup>33</sup>, Patricia L Dyal <sup>41</sup>, Johnathan M Evans <sup>33</sup>, Laia Fina <sup>33</sup>, Bree Gatica-Wilcox <sup>33</sup>, Iliana Georgana <sup>11</sup>, Lauren Gilbert <sup>33</sup>, Lee Graham <sup>33</sup>, Danielle C Groves <sup>38</sup>, Grant Hall <sup>11</sup>, Ember Hilvers <sup>33</sup>, Myra Hosmillo <sup>11</sup>, Hannah Jones <sup>33</sup>, Sophie Jones <sup>33</sup>, Fahad A Khokhar <sup>13</sup>, Sara Kumziene-Summerhayes <sup>33</sup>, George MacIntyre-Cockett <sup>26</sup>, Rocio T Martinez Nunez <sup>94</sup>, Caoimhe McKerr <sup>33</sup>, Claire McMurray <sup>15</sup>, Richard Myers <sup>7</sup>, Yasmin Nicole Panchbhaya <sup>41</sup>, Malte L Pinckert <sup>11</sup>, Amy Plimmer <sup>33</sup>, Joanne Stockton <sup>15</sup>, Sarah Taylor <sup>33</sup>, Alicia Thornton <sup>7</sup>, Amy Trebes <sup>26</sup>, Alexander J Trotter <sup>51</sup>, Helena Jane Tutill <sup>41</sup>, Charlotte A Williams <sup>41</sup>, Anna Yakovleva <sup>11</sup> and Wen C Yew <sup>62</sup>.

### **Sequencing, analysis and software and analysis tools:**

Mohammad T Alam <sup>71</sup>, Laura Baxter <sup>71</sup>, Olivia Boyd <sup>96</sup>, Fabricia F. Nascimento <sup>96</sup>, Timothy M Freeman <sup>38</sup>, Lily Geidelberg <sup>96</sup>, Joseph Hughes <sup>21</sup>, David Jorgensen <sup>96</sup>, Benjamin B Lindsey <sup>38</sup>, Richard J Orton <sup>21</sup>, Manon Ragonnet-Cronin <sup>96</sup> Joel Southgate <sup>33,34</sup>, and Sreenu Vattipally <sup>21</sup>.

### **Samples, logistics and software and analysis tools:**

Igor Starinskij <sup>23</sup>.

### **Visualisation and software and analysis tools:**

Joshua B Singer <sup>21</sup>, Khalil Abudahab <sup>1,30</sup>, Leonardo de Oliveira Martins <sup>51</sup>, Thanh Le-Viet <sup>51</sup>, Mirko Menegazzo <sup>30</sup>, Ben EW Taylor <sup>1,30</sup>, and Corin A Yeats <sup>30</sup>.

### **Project Administration:**

Sophie Palmer <sup>3</sup>, Carol M Churcher <sup>3</sup>, Alisha Davies <sup>33</sup>, Elen De Lacy <sup>33</sup>, Fatima Downing <sup>33</sup>, Sue Edwards <sup>33</sup>, Nikki Smith <sup>38</sup>, and Frances Bolt <sup>44,45</sup>.

### **Leadership and supervision:**

Alex Alderton<sup>1</sup>, Matt Berriman<sup>1</sup>, Ian G Charles <sup>51</sup>, Nicholas Cortes <sup>31</sup>, Tanya Curran <sup>88</sup>, John Danesh<sup>1</sup>, Sahar Eldirdiri <sup>84</sup>, Ngozi Elumogo <sup>52</sup>, Andrew Hattersley <sup>49,50</sup>, Alison Holmes <sup>44,45</sup>, Robin Howe <sup>33</sup>, Rachel Jones <sup>33</sup>, Anita Kenyon <sup>84</sup>, Robert A Kingsley <sup>51</sup>, Dominic Kwiatkowski <sup>1,9</sup>, Cordelia Langford<sup>1</sup>, Jenifer Mason<sup>48</sup>, Alison E Mather <sup>51</sup>, Lizzie Meadows <sup>51</sup>, Sian Morgan <sup>36</sup>, James Price <sup>44,45</sup>, Trevor I Robinson <sup>48</sup>, Giri Shankar<sup>33</sup>, John Wain <sup>51</sup>, and Mark A Webber <sup>51</sup>.

### **Metadata curation:**

Declan T Bradley <sup>5,6</sup>, Michael R Chapman <sup>1,3,4</sup>, Derrick Crooke <sup>28</sup>, David Eyre <sup>28</sup>, Martyn Guest <sup>34</sup>, Huw Gulliver <sup>34</sup>, Sarah Hoosdally <sup>28</sup>, Christine Kitchen <sup>34</sup>, Ian Merrick <sup>34</sup>, Siddharth Mookerjee <sup>44,45</sup>, Robert Munn <sup>34</sup>, Timothy Peto <sup>28</sup>, Will Potter<sup>52</sup>, Dheeraj K Sethi <sup>52</sup>, Wendy Smith <sup>56</sup>, Luke B Snell <sup>75,94</sup>, Rachael Stanley <sup>52</sup>, Claire Stuart <sup>52</sup> and Elizabeth Wastenge<sup>20</sup>.

### **Sequencing and analysis:**

Erwan Acheson <sup>6</sup>, Safiah Afifi <sup>36</sup>, Elias Allara <sup>2,3</sup>, Roberto Amato <sup>1</sup>, Adrienn Angyal <sup>38</sup>, Elihu Aranday-Cortes <sup>21</sup>, Cristina Ariani <sup>1</sup>, Jordan Ashworth <sup>19</sup>, Stephen Attwood <sup>24</sup>, Alp Aydin <sup>51</sup>, David J Baker <sup>51</sup>, Carlos E Balcazar <sup>19</sup>, Angela Beckett <sup>68</sup> Robert Beer <sup>36</sup>, Gilberto Betancor <sup>76</sup>, Emma Betteridge <sup>1</sup>, David Bibby <sup>7</sup>, Daniel Bradshaw<sup>7</sup>, Catherine Bresner <sup>34</sup>, Hannah E Bridgewater <sup>71</sup>, Alice Broos <sup>21</sup>, Rebecca Brown <sup>38</sup>, Paul E Brown <sup>71</sup>, Kirstyn Brunker <sup>22</sup>, Stephen N Carmichael <sup>21</sup>, Jeffrey K. J. Cheng <sup>71</sup>, Dr Rachel Colquhoun <sup>19</sup>, Gavin Dabrera <sup>7</sup>, Johnny Debebe <sup>54</sup>, Eleanor Drury <sup>1</sup>, Louis du Plessis <sup>24</sup>, Richard Eccles <sup>46</sup>, Nicholas Ellaby <sup>7</sup>, Audrey Farbos <sup>49</sup>, Ben Farr <sup>1</sup>, Jacqueline Findlay <sup>41</sup>, Chloe L Fisher <sup>74</sup>, Leysa Marie Forrest <sup>41</sup>, Sarah Francois <sup>24</sup>, Lucy R. Frost <sup>71</sup>, William Fuller<sup>34</sup>, Eileen Gallagher<sup>7</sup>, Michael D Gallagher <sup>19</sup>, Matthew Gemmell <sup>46</sup>, Rachel AJ Gilroy <sup>51</sup>, Scott Goodwin <sup>1</sup>, Luke R Green <sup>38</sup>, Richard Gregory <sup>46</sup>, Natalie Groves <sup>7</sup>, James W Harrison <sup>49</sup>, Hassan Hartman <sup>7</sup>, Andrew R Hesketh <sup>93</sup>, Verity Hill <sup>19</sup>, Jonathan Hubb <sup>7</sup>, Margaret Hughes<sup>46</sup>, David K Jackson <sup>1</sup>, Ben Jackson <sup>19</sup>, Keith James <sup>1</sup>, Natasha Johnson <sup>21</sup>, Ian Johnston <sup>1</sup>, Jon-Paul Keatley<sup>1</sup>, Moritz Kraemer <sup>24</sup>, Angie Lackenby <sup>7</sup>, Mara Lawniczak <sup>1</sup>, David Lee <sup>7</sup>, Rich Livett <sup>1</sup>, Stephanie Lo <sup>1</sup>, Daniel Mair <sup>21</sup>, Joshua Maksimovic <sup>36</sup>, Nikos Manesis <sup>7</sup>, Robin Manley <sup>49</sup>, Carmen Manso <sup>7</sup>, Angela Marchbank <sup>34</sup>, Inigo Martincorena <sup>1</sup>, Tamyo Mbisa <sup>7</sup>, Kathryn McCluggage <sup>36</sup>, JT McCrone <sup>19</sup>, Shahjahan Miah <sup>7</sup>, Michelle L Michelsen <sup>49</sup>, Mari Morgan <sup>33</sup>, Gaia Nebbia <sup>78</sup>, Charlotte

Nelson<sup>46</sup>, Jenna Nichols<sup>21</sup>, Paola Niola<sup>41</sup>, Kyriaki Nomikou<sup>21</sup>, Steve Palmer<sup>1</sup>, Naomi Park<sup>1</sup>, Yasmin A Parr<sup>1</sup>, Paul J Parsons<sup>38</sup>, Vineet Patel<sup>7</sup>, Minal Patel<sup>1</sup>, Clare Pearson<sup>2,1</sup>, Steven Platt<sup>7</sup>, Christoph Puethe<sup>1</sup>, Mike Quail<sup>1</sup>, Jayna Raghwan<sup>24</sup>, Lucille Rainbow<sup>46</sup>, Shavanthi Rajatileka<sup>1</sup>, Mary Ramsay<sup>7</sup>, Paola C Resende Silva<sup>41,42</sup>, Steven Rudder<sup>51</sup>, Chris Ruis<sup>3</sup>, Christine M Sambles<sup>49</sup>, Fei Sang<sup>54</sup>, Ulf Schaefer<sup>7</sup>, Emily Scher<sup>19</sup>, Carol Scott<sup>1</sup>, Lesley Shirley<sup>1</sup>, Adrian W Signell<sup>76</sup>, John Sillitoe<sup>1</sup>, Christen Smith<sup>1</sup>, Dr Katherine L Smollett<sup>21</sup>, Karla Spellman<sup>36</sup>, Thomas D Stanton<sup>19</sup>, David J Studholme<sup>49</sup>, Grace Taylor-Joyce<sup>71</sup>, Ana P Tedim<sup>51</sup>, Thomas Thompson<sup>6</sup>, Nicholas M Thomson<sup>51</sup>, Scott Thurston<sup>1</sup>, Lily Tong<sup>21</sup>, Gerry Tonkin-Hill<sup>1</sup>, Rachel M Tucker<sup>38</sup>, Edith E Vamos<sup>4</sup>, Tetyana Vasylyeva<sup>24</sup>, Joanna Warwick-Dugdale<sup>49</sup>, Danni Weldon<sup>1</sup>, Mark Whitehead<sup>46</sup>, David Williams<sup>7</sup>, Kathleen A Williamson<sup>19</sup>, Harry D Wilson<sup>76</sup>, Trudy Workman<sup>34</sup>, Muhammad Yasir<sup>51</sup>, Xiaoyu Yu<sup>19</sup>, and Alex Zarebski<sup>24</sup>.

### **Samples and logistics:**

Evelien M Adriaenssens<sup>51</sup>, Shazaad S Y Ahmad<sup>2,47</sup>, Adela Alcolea-Medina<sup>59,77</sup>, John Allan<sup>60</sup>, Patawee Asamaphan<sup>21</sup>, Laura Atkinson<sup>40</sup>, Paul Baker<sup>63</sup>, Jonathan Ball<sup>55</sup>, Edward Barton<sup>64</sup>, Mathew A Beale<sup>1</sup>, Charlotte Beaver<sup>1</sup>, Andrew Beggs<sup>16</sup>, Andrew Bell<sup>51</sup>, Duncan J Berger<sup>1</sup>, Louise Berry<sup>56</sup>, Claire M Bewshea<sup>49</sup>, Kelly Bicknell<sup>70</sup>, Paul Bird<sup>58</sup>, Chloe Bishop<sup>7</sup>, Tim Boswell<sup>56</sup>, Cassie Breen<sup>48</sup>, Sarah K Buddenborg<sup>1</sup>, Shirelle Burton-Fanning<sup>66</sup>, Vicki Chalker<sup>7</sup>, Joseph G Chappell<sup>55</sup>, Themoula Charalampous<sup>78,94</sup>, Claire Cormie<sup>3</sup>, Nick Cortes<sup>29,25</sup>, Lindsay J Coupland<sup>52</sup>, Angela Cowell<sup>48</sup>, Rose K Davidson<sup>53</sup>, Joana Dias<sup>3</sup>, Maria Diaz<sup>51</sup>, Thomas Dibling<sup>1</sup>, Matthew J Dorman<sup>1</sup>, Nichola Duckworth<sup>57</sup>, Scott Elliott<sup>70</sup>, Sarah Essex<sup>63</sup>, Karlie Fallon<sup>58</sup>, Theresa Feltwell<sup>8</sup>, Vicki M Fleming<sup>56</sup>, Sally Forrest<sup>3</sup>, Luke Foulser<sup>1</sup>, Maria V Garcia-Casado<sup>1</sup>, Artemis Gavriil<sup>41</sup>, Ryan P George<sup>47</sup>, Laura Gifford<sup>33</sup>, Harmeet K Gill<sup>3</sup>, Jane Greenaway<sup>65</sup>, Luke Griffith<sup>53</sup>, Ana Victoria Gutierrez<sup>51</sup>, Antony D Hale<sup>85</sup>, Tanzina Haque<sup>91</sup>, Katherine L Harper<sup>85</sup>, Ian Harrison<sup>7</sup>, Judith Heaney<sup>89</sup>, Thomas Helmer<sup>58</sup>, Ellen E Higginson<sup>3</sup>, Richard Hopes<sup>2</sup>, Hannah C Howson-Wells<sup>56</sup>, Adam D Hunter<sup>1</sup>, Robert Impey<sup>70</sup>, Dianne Irish-Tavares<sup>91</sup>, David A Jackson<sup>1</sup>, Kathryn A Jackson<sup>46</sup>, Amelia Joseph<sup>56</sup>, Leanne Kane<sup>1</sup>, Sally Kay<sup>1</sup>, Leanne M Kermack<sup>3</sup>, Manjinder Khakh<sup>56</sup>, Stephen P Kidd<sup>29,25,31</sup>, Anastasia Kolyva<sup>51</sup>, Jack CD Lee<sup>40</sup>, Laura Letchford<sup>1</sup>, Nick Levene<sup>79</sup>, Lisa J Levett<sup>89</sup>, Michelle M Lister<sup>56</sup>, Allyson Lloyd<sup>70</sup>, Joshua Loh<sup>60</sup>, Louissa R Macfarlane-Smith<sup>85</sup>, Nicholas W Machin<sup>2,47</sup>, Mailis Maes<sup>3</sup>, Samantha McGuigan<sup>1</sup>, Liz McMinn<sup>1</sup>, Lamia Mestek-Boukhibar<sup>41</sup>, Zoltan Molnar<sup>6</sup>, Lynn Monaghan<sup>79</sup>, Catrin Moore<sup>27</sup>, Plamena Naydenova<sup>3</sup>, Alexandra S Neaverson<sup>1</sup>, Rachel Nelson<sup>1</sup>, Marc O Niebel<sup>21</sup>, Elaine O'Toole<sup>48</sup>, Debra Padgett<sup>64</sup>, Gaurang Patel<sup>1</sup>, Brendan AI Payne<sup>66</sup>, Liam Prestwood<sup>1</sup>, Veena Raviprakash<sup>67</sup>, Nicola Reynolds<sup>86</sup>, Alex Richter<sup>16</sup>, Esther Robinson<sup>95</sup>, Hazel A Rogers<sup>1</sup>, Aileen Rowan<sup>96</sup>, Garren Scott<sup>64</sup>, Divya Shah<sup>40</sup>, Nicola Sheriff<sup>67</sup>, Graciela Sluga, Emily Souster<sup>1</sup>, Michael Spencer-Chapman<sup>1</sup>, Sushmita Sridhar<sup>1,3</sup>, Tracey Swingler<sup>53</sup>, Julian Tang<sup>58</sup>, Graham P Taylor<sup>96</sup>, Theocharis Tsoleridis<sup>55</sup>, Lance Turtle<sup>46</sup>, Sarah Walsh<sup>57</sup>, Michelle Wantoch<sup>86</sup>, Joanne Watts<sup>48</sup>, Sheila Waugh<sup>66</sup>, Sam Weeks<sup>41</sup>, Rebecca Williams<sup>31</sup>, Iona Willingham<sup>56</sup>, Emma L Wise<sup>25,29,31</sup>, Victoria Wright<sup>54</sup>, Sarah Wyllie<sup>70</sup>, and Jamie Young<sup>3</sup>.

### **Software and analysis tools**

Amy Gaskin<sup>33</sup>, Will Rowe<sup>15</sup>, and Igor Siveroni<sup>96</sup>.

### **Visualisation:**

Robert Johnson<sup>96</sup>.

**1** Wellcome Sanger Institute, **2** Public Health England, **3** University of Cambridge, **4** Health Data Research UK, Cambridge, **5** Public Health Agency, Northern Ireland, **6** Queen's University Belfast **7** Public Health England Colindale, **8** Department of Medicine, University of Cambridge, **9** University of Oxford, **10** Departments of Infectious Diseases and Microbiology, Cambridge University Hospitals NHS Foundation Trust; Cambridge, UK, **11** Division of Virology, Department of Pathology, University of Cambridge, **12** The Francis Crick Institute, **13** Cambridge Institute for Therapeutic Immunology and Infectious Disease, Department of Medicine, **14** Public Health England, Clinical Microbiology and Public Health Laboratory, Cambridge, UK, **15** Institute of Microbiology and Infection, University of Birmingham, **16** University of Birmingham, **17** Queen Elizabeth Hospital, **18** Heartlands Hospital, **19** University of Edinburgh, **20** NHS Lothian, **21** MRC-University of Glasgow Centre for Virus Research, **22** Institute of Biodiversity, Animal Health & Comparative Medicine, University of Glasgow, **23** West of Scotland Specialist Virology Centre, **24** Dept Zoology, University of Oxford, **25** University of Surrey, **26** Wellcome Centre for Human Genetics, Nuffield Department of Medicine, University of Oxford, **27** Big Data Institute, Nuffield Department of Medicine, University of Oxford, **28** Oxford University Hospitals NHS Foundation Trust, **29** Basingstoke Hospital, **30** Centre for Genomic Pathogen Surveillance, University of Oxford, **31** Hampshire Hospitals NHS Foundation Trust, **32** University of Southampton, **33** Public Health Wales NHS Trust, **34** Cardiff University, **35** Betsi Cadwaladr University Health Board, **36** Cardiff and Vale University Health Board, **37** Swansea University, **38** University of Sheffield, **39** Sheffield Teaching Hospitals, **40** Great Ormond Street NHS Foundation Trust, **41** University College London, **42** Oswaldo Cruz Institute, Rio de Janeiro **43** North West London Pathology, **44** Imperial College Healthcare NHS Trust, **45** NIHR Health Protection Research Unit in HCAI and AMR, Imperial College London, **46** University of Liverpool, **47** Manchester University NHS Foundation Trust, **48** Liverpool Clinical Laboratories, **49** University of Exeter, **50** Royal Devon and Exeter NHS Foundation Trust, **51** Quadram Institute Bioscience, University of East Anglia, **52** Norfolk and Norwich University Hospital, **53** University of East Anglia, **54** Deep Seq, School of Life Sciences, Queens Medical Centre, University of Nottingham, **55** Virology, School of Life Sciences, Queens Medical Centre, University of Nottingham, **56** Clinical Microbiology Department, Queens Medical Centre, **57** PathLinks, Northern Lincolnshire & Goole NHS Foundation Trust, **58** Clinical Microbiology, University Hospitals of Leicester NHS Trust, **59** Viapath, **60** Hub for Biotechnology in the Built Environment, Northumbria University, **61** NU-OMICS Northumbria University, **62** Northumbria University, **63** South Tees Hospitals NHS Foundation Trust, **64** North Cumbria Integrated Care NHS Foundation Trust, **65** North Tees and Hartlepool NHS Foundation Trust, **66** Newcastle Hospitals NHS Foundation Trust, **67** County Durham and Darlington NHS Foundation Trust, **68** Centre for Enzyme Innovation, University of Portsmouth, **69** School of Biological Sciences, University of Portsmouth, **70** Portsmouth Hospitals NHS Trust, **71** University of Warwick, **72** University Hospitals Coventry and Warwickshire, **73** Warwick Medical School and Institute of Precision Diagnostics, Pathology, UHCW NHS Trust, **74** Genomics Innovation Unit, Guy's and St. Thomas' NHS Foundation Trust, **75** Centre for Clinical Infection & Diagnostics Research, St. Thomas' Hospital and Kings College London, **76** Department of Infectious Diseases, King's College London, **77** Guy's and St. Thomas' Hospitals NHS Foundation Trust, **78** Centre for Clinical Infection and Diagnostics Research, Department of Infectious Diseases, Guy's and St Thomas' NHS Foundation Trust, **79** Princess Alexandra Hospital Microbiology Dept. , **80** Cambridge University Hospitals NHS Foundation Trust, **81** East Kent Hospitals University NHS Foundation Trust, **82** University of Kent, **83** Gloucestershire Hospitals NHS Foundation Trust, **84** Department of Microbiology, Kettering General Hospital, **85** National Infection Service, PHE and Leeds Teaching Hospitals Trust, **86** Cambridge Stem Cell Institute, University of Cambridge, **87** Public Health Scotland, **88** Belfast Health & Social Care Trust, **89** Health Services Laboratories, **90** Barking, Havering and Redbridge University Hospitals NHS Trust, **91** Royal Free NHS Trust, **92** Maidstone and Tunbridge Wells NHS Trust, **93** University of Brighton, **94** Kings College London, **95** PHE Heartlands, **96** Imperial College London.
