# Supplementary material for: Emergence of immune escape at dominant SARS-CoV-2 killer T-cell epitope
Source: bioRxiv or medRxiv preprint supplement (doi:10.1101/2021.06.21.21259010), 2021-07-14
Supplement: Supplementary file [file media-2.pdf]

|                                                                                                                                                                                                                                                                                                                                                                                                                                                                                                                                                                                                                                                                                                                                                                                                                                                                                                                                                                                                                                                                                                                                                                                                                                                                                                                                                                                                                                                                                                                                                                                                                                                                                                                                                                                                                                                                                                                |                                                                                                                                                                                                 |                                                                            |                                                                                                                                                                                                                                                                                                                                                                                                                                                                                                                                                                                                                                                                                                  |
|----------------------------------------------------------------------------------------------------------------------------------------------------------------------------------------------------------------------------------------------------------------------------------------------------------------------------------------------------------------------------------------------------------------------------------------------------------------------------------------------------------------------------------------------------------------------------------------------------------------------------------------------------------------------------------------------------------------------------------------------------------------------------------------------------------------------------------------------------------------------------------------------------------------------------------------------------------------------------------------------------------------------------------------------------------------------------------------------------------------------------------------------------------------------------------------------------------------------------------------------------------------------------------------------------------------------------------------------------------------------------------------------------------------------------------------------------------------------------------------------------------------------------------------------------------------------------------------------------------------------------------------------------------------------------------------------------------------------------------------------------------------------------------------------------------------------------------------------------------------------------------------------------------------|-------------------------------------------------------------------------------------------------------------------------------------------------------------------------------------------------|----------------------------------------------------------------------------|--------------------------------------------------------------------------------------------------------------------------------------------------------------------------------------------------------------------------------------------------------------------------------------------------------------------------------------------------------------------------------------------------------------------------------------------------------------------------------------------------------------------------------------------------------------------------------------------------------------------------------------------------------------------------------------------------|
| EP1_ISL_863640, EP1_ISL_863649, EP1_ISL_863653, EP1_ISL_863659, EP1_ISL_863688, EP1_ISL_863733, EP1_ISL_863743, EP1_ISL_863759, EP1_ISL_863791                                                                                                                                                                                                                                                                                                                                                                                                                                                                                                                                                                                                                                                                                                                                                                                                                                                                                                                                                                                                                                                                                                                                                                                                                                                                                                                                                                                                                                                                                                                                                                                                                                                                                                                                                                 | Lighthouse Lab in Glasgow                                                                                                                                                                       | Wellcome Sanger Institute for the COVID-19 Genomics UK (COG-UK) Consortium | Harpreet Vanshenhouse, Yurni Kasai, David Gray, Carol Clugston, Anna Dominiczak and Alex Alderton, Roberto Amato, Sonia Goncalves, Ewan Harrison, David K. Jackson, Ian Johnston, Dominic Kwiatkowski, Cordelia Langford, John Sillitoe on behalf of the Wellcome Sanger Institute COVID-19 Surveillance Team                                                                                                                                                                                                                                                                                                                                                                                    |
| EP1_ISL_863815, EP1_ISL_863881                                                                                                                                                                                                                                                                                                                                                                                                                                                                                                                                                                                                                                                                                                                                                                                                                                                                                                                                                                                                                                                                                                                                                                                                                                                                                                                                                                                                                                                                                                                                                                                                                                                                                                                                                                                                                                                                                 | Lighthouse Lab in Milton Keynes                                                                                                                                                                 | Wellcome Sanger Institute for the COVID-19 Genomics UK (COG-UK) Consortium | The Lighthouse Lab in Milton Keynes and Alex Alderton, Roberto Amato, Sonia Goncalves, Ewan Harrison, David K. Jackson, Ian Johnston, Dominic Kwiatkowski, Cordelia Langford, John Sillitoe on behalf of the Wellcome Sanger Institute COVID-19 Surveillance Team                                                                                                                                                                                                                                                                                                                                                                                                                                |
| EP1_ISL_863870, EP1_ISL_863884, EP1_ISL_863892, EP1_ISL_863894, EP1_ISL_863906, EP1_ISL_863911, EP1_ISL_863915, EP1_ISL_863916, EP1_ISL_863923, EP1_ISL_863927, EP1_ISL_863930, EP1_ISL_863948, EP1_ISL_863950, EP1_ISL_863954, EP1_ISL_863955, EP1_ISL_863962, EP1_ISL_863963, EP1_ISL_864000, EP1_ISL_864009, EP1_ISL_864039, EP1_ISL_864107, EP1_ISL_864110, EP1_ISL_864123, EP1_ISL_864134, EP1_ISL_864139, EP1_ISL_864141, EP1_ISL_864144, EP1_ISL_864147, EP1_ISL_864152, EP1_ISL_864160, EP1_ISL_864164, EP1_ISL_864166, EP1_ISL_864171, EP1_ISL_864177, EP1_ISL_864178, EP1_ISL_864179, EP1_ISL_864180                                                                                                                                                                                                                                                                                                                                                                                                                                                                                                                                                                                                                                                                                                                                                                                                                                                                                                                                                                                                                                                                                                                                                                                                                                                                                                 | Lighthouse Lab in Milton Keynes                                                                                                                                                                 | Wellcome Sanger Institute for the COVID-19 Genomics UK (COG-UK) Consortium | The Lighthouse Lab in Milton Keynes and Alex Alderton, Roberto Amato, Sonia Goncalves, Ewan Harrison, David K. Jackson, Ian Johnston, Dominic Kwiatkowski, Cordelia Langford, John Sillitoe on behalf of the Wellcome Sanger Institute COVID-19 Surveillance Team                                                                                                                                                                                                                                                                                                                                                                                                                                |
| EP1_ISL_864193                                                                                                                                                                                                                                                                                                                                                                                                                                                                                                                                                                                                                                                                                                                                                                                                                                                                                                                                                                                                                                                                                                                                                                                                                                                                                                                                                                                                                                                                                                                                                                                                                                                                                                                                                                                                                                                                                                 | Lighthouse Lab in Milton Keynes                                                                                                                                                                 | Wellcome Sanger Institute for the COVID-19 Genomics UK (COG-UK) Consortium | The Lighthouse Lab in Milton Keynes and Alex Alderton, Roberto Amato, Sonia Goncalves, Ewan Harrison, David K. Jackson, Ian Johnston, Dominic Kwiatkowski, Cordelia Langford, John Sillitoe on behalf of the Wellcome Sanger Institute COVID-19 Surveillance Team                                                                                                                                                                                                                                                                                                                                                                                                                                |
| EP1_ISL_864199                                                                                                                                                                                                                                                                                                                                                                                                                                                                                                                                                                                                                                                                                                                                                                                                                                                                                                                                                                                                                                                                                                                                                                                                                                                                                                                                                                                                                                                                                                                                                                                                                                                                                                                                                                                                                                                                                                 | Lighthouse Lab in Alderley Park                                                                                                                                                                 | Wellcome Sanger Institute for the COVID-19 Genomics UK (COG-UK) Consortium | The Lighthouse Lab in Alderley Park and Alex Alderton, Roberto Amato, Sonia Goncalves, Ewan Harrison, David K. Jackson, Ian Johnston, Dominic Kwiatkowski, Cordelia Langford, John Sillitoe on behalf of the Wellcome Sanger Institute COVID-19 Surveillance Team                                                                                                                                                                                                                                                                                                                                                                                                                                |
| EP1_ISL_864221, EP1_ISL_864240, EP1_ISL_864293, EP1_ISL_864300, EP1_ISL_864319, EP1_ISL_864368, EP1_ISL_864371, EP1_ISL_864444, EP1_ISL_864449, EP1_ISL_864491, EP1_ISL_864497, EP1_ISL_864511, EP1_ISL_864520                                                                                                                                                                                                                                                                                                                                                                                                                                                                                                                                                                                                                                                                                                                                                                                                                                                                                                                                                                                                                                                                                                                                                                                                                                                                                                                                                                                                                                                                                                                                                                                                                                                                                                 | Lighthouse Lab in Milton Keynes                                                                                                                                                                 | Wellcome Sanger Institute for the COVID-19 Genomics UK (COG-UK) Consortium | The Lighthouse Lab in Milton Keynes and Alex Alderton, Roberto Amato, Sonia Goncalves, Ewan Harrison, David K. Jackson, Ian Johnston, Dominic Kwiatkowski, Cordelia Langford, John Sillitoe on behalf of the Wellcome Sanger Institute COVID-19 Surveillance Team                                                                                                                                                                                                                                                                                                                                                                                                                                |
| EP1_ISL_864545                                                                                                                                                                                                                                                                                                                                                                                                                                                                                                                                                                                                                                                                                                                                                                                                                                                                                                                                                                                                                                                                                                                                                                                                                                                                                                                                                                                                                                                                                                                                                                                                                                                                                                                                                                                                                                                                                                 | Institute of Medical Microbiology and Hospital Hygiene                                                                                                                                          | Institute of Medical Microbiology and Hospital Hygiene                     | Prof. Dr. Achim Kaasch, Aljoscha Terstegen                                                                                                                                                                                                                                                                                                                                                                                                                                                                                                                                                                                                                                                       |
| EP1_ISL_864582                                                                                                                                                                                                                                                                                                                                                                                                                                                                                                                                                                                                                                                                                                                                                                                                                                                                                                                                                                                                                                                                                                                                                                                                                                                                                                                                                                                                                                                                                                                                                                                                                                                                                                                                                                                                                                                                                                 | CHU Purpan - Laboratoire de Virologie - Institut Fédératif de Biologie                                                                                                                          | CHU Purpan - Laboratoire de Virologie - Institut Fédératif de Biologie     | Lator J., Fangerer N., Duouis M., Carcenac R., Harer A., Boyer P., Temeaux P., Izopet J.                                                                                                                                                                                                                                                                                                                                                                                                                                                                                                                                                                                                         |
| EP1_ISL_864594, EP1_ISL_864641, EP1_ISL_864654, EP1_ISL_864655, EP1_ISL_864661, EP1_ISL_864662, EP1_ISL_864675, EP1_ISL_864677, EP1_ISL_864679, EP1_ISL_864686, EP1_ISL_864687, EP1_ISL_864691, EP1_ISL_864710, EP1_ISL_864714, EP1_ISL_864736                                                                                                                                                                                                                                                                                                                                                                                                                                                                                                                                                                                                                                                                                                                                                                                                                                                                                                                                                                                                                                                                                                                                                                                                                                                                                                                                                                                                                                                                                                                                                                                                                                                                 | University Hospitals of Geneva, a Laboratory of Virology                                                                                                                                        | HUG, Laboratory of Virology and the Health2030 Genome Center               | Samuel Cordey, Ana Rita Goncalves, Laurent Kaiser, Lorenzo Ganuti, Henri Poppo, Melyssa Elias, Deborah Penei, Keith Hashman, Ioannis Xenarios, Emmanouil Demertzakis                                                                                                                                                                                                                                                                                                                                                                                                                                                                                                                             |
| EP1_ISL_864749, EP1_ISL_864782, EP1_ISL_864843, EP1_ISL_864852, EP1_ISL_864855, EP1_ISL_864876, EP1_ISL_864886, EP1_ISL_864914, EP1_ISL_864920, EP1_ISL_864954, EP1_ISL_864957                                                                                                                                                                                                                                                                                                                                                                                                                                                                                                                                                                                                                                                                                                                                                                                                                                                                                                                                                                                                                                                                                                                                                                                                                                                                                                                                                                                                                                                                                                                                                                                                                                                                                                                                 | see above                                                                                                                                                                                       | see above                                                                  | see above                                                                                                                                                                                                                                                                                                                                                                                                                                                                                                                                                                                                                                                                                        |
| EP1_ISL_864968, EP1_ISL_864969, EP1_ISL_864977, EP1_ISL_864988, EP1_ISL_864993, EP1_ISL_864995                                                                                                                                                                                                                                                                                                                                                                                                                                                                                                                                                                                                                                                                                                                                                                                                                                                                                                                                                                                                                                                                                                                                                                                                                                                                                                                                                                                                                                                                                                                                                                                                                                                                                                                                                                                                                 | Department of Pathology, University of Cambridge                                                                                                                                                | COVID-19 Genomics UK (COG-UK) Consortium                                   | Arun S. Jahn, Yasmin Chaudhry, Grant Hall, Iliana Georgiana, Myra Hosmillo, Martin D. Curran, Malie Prockert, Surendra Parmar, Ian Goodfellow                                                                                                                                                                                                                                                                                                                                                                                                                                                                                                                                                    |
| EP1_ISL_865000, EP1_ISL_865001, EP1_ISL_865002, EP1_ISL_865003, EP1_ISL_865005, EP1_ISL_865006, EP1_ISL_865007, EP1_ISL_865009, EP1_ISL_865010, EP1_ISL_865011                                                                                                                                                                                                                                                                                                                                                                                                                                                                                                                                                                                                                                                                                                                                                                                                                                                                                                                                                                                                                                                                                                                                                                                                                                                                                                                                                                                                                                                                                                                                                                                                                                                                                                                                                 | West of Scotland Specialist Virology Centre, NHS/SGCG / MRC-University of Glasgow                                                                                                               | COVID-19 Genomics UK (COG-UK) Consortium                                   | Ana da Silva Filipe, Natasha Johnson, Kathy Smollett, Daniel Meir, Stephen Carmichael, Alice Brooks, Lily Tong, Jenna Nichols, Kyriaki Nontikou, Sarah McDonald, Harpreet Vanshenhouse, Yurni Kasai, David Gray, Carol Clugston, Anna Dominiczak, Alasdair McClean, Rory Gurnson, Richard Orton, Joseph Hughes, Steenu Vaidipally, David L. Robertson, Sharif Shaaban, Matthew Holden, Kathy Li, James Shepherd, Antonia Ho, Emma Thomson                                                                                                                                                                                                                                                        |
| EP1_ISL_865035, EP1_ISL_865045, EP1_ISL_865053, EP1_ISL_865054, EP1_ISL_865061, EP1_ISL_865082, EP1_ISL_865086                                                                                                                                                                                                                                                                                                                                                                                                                                                                                                                                                                                                                                                                                                                                                                                                                                                                                                                                                                                                                                                                                                                                                                                                                                                                                                                                                                                                                                                                                                                                                                                                                                                                                                                                                                                                 | West of Scotland Specialist Virology Centre, NHS/SGCG / MRC-University of Glasgow                                                                                                               | COVID-19 Genomics UK (COG-UK) Consortium                                   | Ana da Silva Filipe, Natasha Johnson, Kathy Smollett, Daniel Meir, Stephen Carmichael, Alice Brooks, Lily Tong, Jenna Nichols, Kyriaki Nontikou, Sarah McDonald, Richard Orton, Joseph Hughes, Steenu Vaidipally, David L. Robertson, Alasdair McClean, Rory Gurnson, Sharif Shaaban, Matthew Holden, Rachel Baczow, Guy Molllet, Kathy Li, James Shepherd, Antonia Ho, Emma Thomson                                                                                                                                                                                                                                                                                                             |
| EP1_ISL_865070, EP1_ISL_865075, EP1_ISL_865076, EP1_ISL_865078, EP1_ISL_865079, EP1_ISL_865083, EP1_ISL_865084, EP1_ISL_865085, EP1_ISL_865086, EP1_ISL_865087, EP1_ISL_865088, EP1_ISL_865089, EP1_ISL_865090, EP1_ISL_865091, EP1_ISL_865092, EP1_ISL_865095, EP1_ISL_865100, EP1_ISL_865101, EP1_ISL_865102, EP1_ISL_865103, EP1_ISL_865111, EP1_ISL_865112, EP1_ISL_865114, EP1_ISL_865116, EP1_ISL_865117, EP1_ISL_865118, EP1_ISL_865120, EP1_ISL_865122, EP1_ISL_865125, EP1_ISL_865129, EP1_ISL_865130, EP1_ISL_865131, EP1_ISL_865132, EP1_ISL_865133, EP1_ISL_865134, EP1_ISL_865135, EP1_ISL_865140, EP1_ISL_865141, EP1_ISL_865142, EP1_ISL_865148, EP1_ISL_865149                                                                                                                                                                                                                                                                                                                                                                                                                                                                                                                                                                                                                                                                                                                                                                                                                                                                                                                                                                                                                                                                                                                                                                                                                                 | Victoria Department, Royal Infirmary of Edinburgh, NHS Lothian / School of Biological Sciences, University of Edinburgh / Institute of Genetics and Molecular Medicine, University of Edinburgh | COVID-19 Genomics UK (COG-UK) Consortium                                   | McHugh M., Dewar R., Rooke S., Gallagher M., Balazs C., O'Toole A., Soper E., Hill V., McCrone J.T., Colquhoun R., Yu X., Jackson B., Rambaut A., Williams T.C., Templeton K                                                                                                                                                                                                                                                                                                                                                                                                                                                                                                                     |
| EP1_ISL_865164, EP1_ISL_865168, EP1_ISL_865170, EP1_ISL_865172, EP1_ISL_865173, EP1_ISL_865174, EP1_ISL_865181, EP1_ISL_865182, EP1_ISL_865186, EP1_ISL_865189, EP1_ISL_865192, EP1_ISL_865194, EP1_ISL_865198, EP1_ISL_865199, EP1_ISL_865203, EP1_ISL_865207, EP1_ISL_865208, EP1_ISL_865209, EP1_ISL_865210, EP1_ISL_865211, EP1_ISL_865212, EP1_ISL_865213, EP1_ISL_865215, EP1_ISL_865216, EP1_ISL_865217, EP1_ISL_865220, EP1_ISL_865226, EP1_ISL_865228, EP1_ISL_865229, EP1_ISL_865230, EP1_ISL_865231, EP1_ISL_865232, EP1_ISL_865233, EP1_ISL_865234, EP1_ISL_865235, EP1_ISL_865236, EP1_ISL_865237, EP1_ISL_865240, EP1_ISL_865242, EP1_ISL_865244, EP1_ISL_865247, EP1_ISL_865249, EP1_ISL_865250, EP1_ISL_865251, EP1_ISL_865253, EP1_ISL_865254, EP1_ISL_865255, EP1_ISL_865256, EP1_ISL_865257, EP1_ISL_865258, EP1_ISL_865261, EP1_ISL_865262, EP1_ISL_865265, EP1_ISL_865266, EP1_ISL_865267, EP1_ISL_865269, EP1_ISL_865270, EP1_ISL_865271, EP1_ISL_865278, EP1_ISL_865282, EP1_ISL_865285, EP1_ISL_865287, EP1_ISL_865292, EP1_ISL_865297, EP1_ISL_865302, EP1_ISL_865303, EP1_ISL_865310, EP1_ISL_865317, EP1_ISL_865318, EP1_ISL_865319, EP1_ISL_865344, EP1_ISL_865346, EP1_ISL_865348, EP1_ISL_865349, EP1_ISL_865367, EP1_ISL_865375, EP1_ISL_865379, EP1_ISL_865383, EP1_ISL_865384, EP1_ISL_865389, EP1_ISL_865390, EP1_ISL_865392, EP1_ISL_865393, EP1_ISL_865395, EP1_ISL_865396, EP1_ISL_865397, EP1_ISL_865400, EP1_ISL_865401, EP1_ISL_865409, EP1_ISL_865414, EP1_ISL_865417, EP1_ISL_865418, EP1_ISL_865419, EP1_ISL_865420, EP1_ISL_865422, EP1_ISL_865423, EP1_ISL_865424, EP1_ISL_865429, EP1_ISL_865432, EP1_ISL_865435, EP1_ISL_865441, EP1_ISL_865443, EP1_ISL_865444, EP1_ISL_865445, EP1_ISL_865446, EP1_ISL_865447, EP1_ISL_865452, EP1_ISL_865457, EP1_ISL_865459, EP1_ISL_865461, EP1_ISL_865462, EP1_ISL_865463, EP1_ISL_865464, EP1_ISL_865467, EP1_ISL_865471 | Liverpool Clinical Laboratories                                                                                                                                                                 | COVID-19 Genomics UK (COG-UK) Consortium                                   | Sam Haddenby, Anita Luczka, Steve Paterson, Julian Hiscox, Alistair Darty, M Aitzaud, A Alvezahi, Muhammed Alruwaili, Stuart D Armstrong, Jones Benjamin, Eleanor G Bentley, Anu Chawla, Jordan J Clark, Angela Cowell, Richard Eccles, Isabel Garcia-Donval, Matthew Gammell, Alessandro Gerada, PKR Gilmore, Richard Gregory, Ximeng Han, Catherine Harcourt, Margaret Hughes, Wilen Turiza-Gomara, James Johnson, L. Liu, Jenna Jamari, Marston, Charlotte Nelson, Elaine O'Toole, Casiste Olatubi, Rebekah Partridge-Haradi, Lucille Randolph, N.P. Randle, Trevor Ian Robinson, Paul Sherrin, Ghada T Shawi, James P Stewart, Neil Swainson, Ecaterina Varnos, Joanna Vrats, Mark Whitehead |
| EP1_ISL_865492, EP1_ISL_865506, EP1_ISL_865510, EP1_ISL_865549, EP1_ISL_865562                                                                                                                                                                                                                                                                                                                                                                                                                                                                                                                                                                                                                                                                                                                                                                                                                                                                                                                                                                                                                                                                                                                                                                                                                                                                                                                                                                                                                                                                                                                                                                                                                                                                                                                                                                                                                                 | Bans Health NHS Trust                                                                                                                                                                           | COVID-19 Genomics UK (COG-UK) Consortium                                   | CUTINO-MOQUEL, Maria Teresa, HARRINGTON, David, OWOYEMI, Dola, KULASEGARAN-SHYLINI, Raghavendran, BHOAD, Claire, KELE, Beatrix Holmes, Judith Brauer                                                                                                                                                                                                                                                                                                                                                                                                                                                                                                                                             |
| EP1_ISL_865698, EP1_ISL_866681, EP1_ISL_866698, EP1_ISL_865704, EP1_ISL_865705, EP1_ISL_865712, EP1_ISL_865714, EP1_ISL_865734, EP1_ISL_865737, EP1_ISL_865738, EP1_ISL_866815, EP1_ISL_866883, EP1_ISL_866912, EP1_ISL_866933, EP1_ISL_866939, EP1_ISL_866917, EP1_ISL_866919, EP1_ISL_866948, EP1_ISL_866954, EP1_ISL_866916, EP1_ISL_866133                                                                                                                                                                                                                                                                                                                                                                                                                                                                                                                                                                                                                                                                                                                                                                                                                                                                                                                                                                                                                                                                                                                                                                                                                                                                                                                                                                                                                                                                                                                                                                 | University College London, Great Ormond Street Hospital for Children NHS Foundation Trust, Imperial College Healthcare NHS Trust                                                                | COVID-19 Genomics UK (COG-UK) Consortium                                   | Sergi Castellano, Rachel Williams, Mark Kristiansen, Paola Resende Silva, Sumarno Roy, Tony Brooks, Helena Tullij, Paola Nolis, Patricia Dial, Charlotte Williams, Leyza Forrest, Yasmin Parachbaya, Jacqueline Findlay, Jacqueline Weeks, Juliana Brown, Kathryn Harris, Paul Randell, James Price, Alison Holmes, Judith Brauer                                                                                                                                                                                                                                                                                                                                                                |
| EP1_ISL_866048, EP1_ISL_866054, EP1_ISL_866116, EP1_ISL_866133                                                                                                                                                                                                                                                                                                                                                                                                                                                                                                                                                                                                                                                                                                                                                                                                                                                                                                                                                                                                                                                                                                                                                                                                                                                                                                                                                                                                                                                                                                                                                                                                                                                                                                                                                                                                                                                 | University College London Hospital                                                                                                                                                              | COVID-19 Genomics UK (COG-UK) Consortium                                   | Judith Heaney, Matthew Byott, Catherine Houlihan, Dan Frampton, Stuart Kirk, Moira Szyer and Eran Nestouli                                                                                                                                                                                                                                                                                                                                                                                                                                                                                                                                                                                       |











|                                                                                                                                                                                                                                                                                                                                                                                                                                                                                                                                                                                                                                                |                                                                                                                                                                                                                                |                                                                                                                                                                                  |                                                                                                                                                                                                                                                                                                                                                                        |
|------------------------------------------------------------------------------------------------------------------------------------------------------------------------------------------------------------------------------------------------------------------------------------------------------------------------------------------------------------------------------------------------------------------------------------------------------------------------------------------------------------------------------------------------------------------------------------------------------------------------------------------------|--------------------------------------------------------------------------------------------------------------------------------------------------------------------------------------------------------------------------------|----------------------------------------------------------------------------------------------------------------------------------------------------------------------------------|------------------------------------------------------------------------------------------------------------------------------------------------------------------------------------------------------------------------------------------------------------------------------------------------------------------------------------------------------------------------|
| EP1_ISL_891670, EP1_ISL_891680, EP1_ISL_891778, EP1_ISL_891781, EP1_ISL_891786                                                                                                                                                                                                                                                                                                                                                                                                                                                                                                                                                                 | Lighthouse Lab in Glasgow                                                                                                                                                                                                      | Wellcome Sanger Institute for the COVID-19 Genomics UK (COG-UK) Consortium                                                                                                       | David K. Jackson, Ian Johnston, Dominic Kwiatkowski, Cordelia Langford, John Sillitoe on behalf of the Wellcome Sanger Institute COVID-19 Surveillance Team                                                                                                                                                                                                            |
| EP1_ISL_891807                                                                                                                                                                                                                                                                                                                                                                                                                                                                                                                                                                                                                                 | Lighthouse Lab in Aberdeen Park                                                                                                                                                                                                | Wellcome Sanger Institute for the COVID-19 Genomics UK (COG-UK) Consortium                                                                                                       | Jacquelyn Wynn, Mairead Hyland, The Lighthouse Lab in Aberdeen Park and Alex Alderton, Roberto Amato, Sonia Goncalves, Ewan Harrison, David K. Jackson, Ian Johnston, Dominic Kwiatkowski, Cordelia Langford, John Sillitoe on behalf of the Wellcome Sanger Institute COVID-19 Surveillance Team                                                                      |
| EP1_ISL_891828                                                                                                                                                                                                                                                                                                                                                                                                                                                                                                                                                                                                                                 | Lighthouse Lab in Glasgow                                                                                                                                                                                                      | Wellcome Sanger Institute for the COVID-19 Genomics UK (COG-UK) Consortium                                                                                                       | Harper VanSteenhouse, Yurni Kasal, David Gray, Carol Clugston, Anna Dominiczak and Alex Alderton, Roberto Amato, Sonia Goncalves, Ewan Harrison, David K. Jackson, Ian Johnston, Dominic Kwiatkowski, Cordelia Langford, John Sillitoe on behalf of the Wellcome Sanger Institute COVID-19 Surveillance Team                                                           |
| EP1_ISL_891838, EP1_ISL_891870, EP1_ISL_891926, EP1_ISL_891968, EP1_ISL_891969, EP1_ISL_891977, EP1_ISL_891986, EP1_ISL_892005, EP1_ISL_892009, EP1_ISL_892127, EP1_ISL_892133, EP1_ISL_892141, EP1_ISL_892167, EP1_ISL_892174, EP1_ISL_892179, EP1_ISL_892193, EP1_ISL_892194, EP1_ISL_892197, EP1_ISL_892213, EP1_ISL_892216, EP1_ISL_892220, EP1_ISL_892222, EP1_ISL_892223                                                                                                                                                                                                                                                                 | Lighthouse Lab in Aberdeen Park                                                                                                                                                                                                | Wellcome Sanger Institute for the COVID-19 Genomics UK (COG-UK) Consortium                                                                                                       | Jacquelyn Wynn, Mairead Hyland, The Lighthouse Lab in Aberdeen Park and Alex Alderton, Roberto Amato, Sonia Goncalves, Ewan Harrison, David K. Jackson, Ian Johnston, Dominic Kwiatkowski, Cordelia Langford, John Sillitoe on behalf of the Wellcome Sanger Institute COVID-19 Surveillance Team                                                                      |
| EP1_ISL_892228, EP1_ISL_892234                                                                                                                                                                                                                                                                                                                                                                                                                                                                                                                                                                                                                 | Lighthouse Lab in Glasgow                                                                                                                                                                                                      | Wellcome Sanger Institute for the COVID-19 Genomics UK (COG-UK) Consortium                                                                                                       | Harper VanSteenhouse, Yurni Kasal, David Gray, Carol Clugston, Anna Dominiczak and Alex Alderton, Roberto Amato, Sonia Goncalves, Ewan Harrison, David K. Jackson, Ian Johnston, Dominic Kwiatkowski, Cordelia Langford, John Sillitoe on behalf of the Wellcome Sanger Institute COVID-19 Surveillance Team                                                           |
| EP1_ISL_892270, EP1_ISL_892271, EP1_ISL_892272                                                                                                                                                                                                                                                                                                                                                                                                                                                                                                                                                                                                 | Servicio de Microbiología Clínica (Complejo Hospitalario de Navarra, Pamplona), Instituto de Investigación Sanitaria de Navarra (IISNA)                                                                                        | SeqCOVID-SPAIN consortium/IBV(CSIC)                                                                                                                                              | Carmen Ezpeleta Baquedano, Ana Navascués, Ana Miqueliez and SeqCOVID-SPAIN consortium                                                                                                                                                                                                                                                                                  |
| EP1_ISL_892273                                                                                                                                                                                                                                                                                                                                                                                                                                                                                                                                                                                                                                 | Servicio de Microbiología, Hospital Universitario Donostia, OSI Donostialdea, Área de Enfermedades Infecciosas, Grupo de Infección Respiratoria y Resistencia Antimicrobiana, Instituto de Investigación Sanitaria Biodonostia | SeqCOVID-SPAIN consortium/IBV(CSIC)                                                                                                                                              | Gustavo Cilla Eguiluz, Milagrosa Montes Fos, Luis Pihierro Vázquez, Ane Sorraín, Jose Maria Wainron and SeqCOVID-SPAIN consortium                                                                                                                                                                                                                                      |
| EP1_ISL_892275, EP1_ISL_892277                                                                                                                                                                                                                                                                                                                                                                                                                                                                                                                                                                                                                 | Servicio de Microbiología Clínica (Complejo Hospitalario de Navarra, Pamplona), Instituto de Investigación Sanitaria de Navarra (IISNA)                                                                                        | SeqCOVID-SPAIN consortium/IBV(CSIC)                                                                                                                                              | Carmen Ezpeleta Baquedano, Ana Navascués, Ana Miqueliez and SeqCOVID-SPAIN consortium                                                                                                                                                                                                                                                                                  |
| EP1_ISL_892280, EP1_ISL_892281, EP1_ISL_892282, EP1_ISL_892283, EP1_ISL_892284, EP1_ISL_892285, EP1_ISL_892286, EP1_ISL_892287, EP1_ISL_892289, EP1_ISL_892290, EP1_ISL_892291, EP1_ISL_892292, EP1_ISL_892296, EP1_ISL_892297, EP1_ISL_892300, EP1_ISL_892301, EP1_ISL_892303, EP1_ISL_892304, EP1_ISL_892305, EP1_ISL_892306, EP1_ISL_892307, EP1_ISL_892309, EP1_ISL_892310, EP1_ISL_892311, EP1_ISL_892312, EP1_ISL_892313, EP1_ISL_892314, EP1_ISL_892315, EP1_ISL_892316, EP1_ISL_892317, EP1_ISL_892318, EP1_ISL_892319, EP1_ISL_892321, EP1_ISL_892322, EP1_ISL_892323, EP1_ISL_892324                                                 | SeqCOVID-SPAIN consortium/IBV(CSIC)                                                                                                                                                                                            | Gustavo Cilla Eguiluz, Milagrosa Montes Fos, Luis Pihierro Vázquez, Ane Sorraín, Jose Maria Wainron and SeqCOVID-SPAIN consortium                                                |                                                                                                                                                                                                                                                                                                                                                                        |
| see above                                                                                                                                                                                                                                                                                                                                                                                                                                                                                                                                                                                                                                      | Servicio de Microbiología, Hospital Universitario Donostia, OSI Donostialdea, Área de Enfermedades Infecciosas, Grupo de Infección Respiratoria y Resistencia Antimicrobiana, Instituto de Investigación Sanitaria Biodonostia | SeqCOVID-SPAIN consortium/IBV(CSIC)                                                                                                                                              | Gustavo Cilla Eguiluz, Milagrosa Montes Fos, Luis Pihierro Vázquez, Ane Sorraín, Jose Maria Wainron and SeqCOVID-SPAIN consortium                                                                                                                                                                                                                                      |
| see above                                                                                                                                                                                                                                                                                                                                                                                                                                                                                                                                                                                                                                      | Servicio de Microbiología Clínica (Complejo Hospitalario de Navarra, Pamplona), Instituto de Investigación Sanitaria de Navarra (IISNA)                                                                                        | SeqCOVID-SPAIN consortium/IBV(CSIC)                                                                                                                                              | Carmen Ezpeleta Baquedano, Ana Navascués, Ana Miqueliez and SeqCOVID-SPAIN consortium                                                                                                                                                                                                                                                                                  |
| EP1_ISL_892325, EP1_ISL_892326, EP1_ISL_892327, EP1_ISL_892328, EP1_ISL_892329, EP1_ISL_892330, EP1_ISL_892331, EP1_ISL_892332, EP1_ISL_892333, EP1_ISL_892334, EP1_ISL_892335, EP1_ISL_892336, EP1_ISL_892337, EP1_ISL_892338, EP1_ISL_892339, EP1_ISL_892340, EP1_ISL_892341, EP1_ISL_892342, EP1_ISL_892343, EP1_ISL_892344, EP1_ISL_892345, EP1_ISL_892346, EP1_ISL_892347, EP1_ISL_892348, EP1_ISL_892349, EP1_ISL_892350, EP1_ISL_892351, EP1_ISL_892352, EP1_ISL_892353, EP1_ISL_892354, EP1_ISL_892355, EP1_ISL_892356, EP1_ISL_892357, EP1_ISL_892358, EP1_ISL_892359, EP1_ISL_892360, EP1_ISL_892361, EP1_ISL_892362, EP1_ISL_892363 | SeqCOVID-SPAIN consortium/IBV(CSIC)                                                                                                                                                                                            | Carmen Ezpeleta Baquedano, Ana Navascués, Ana Miqueliez and SeqCOVID-SPAIN consortium                                                                                            |                                                                                                                                                                                                                                                                                                                                                                        |
| see above                                                                                                                                                                                                                                                                                                                                                                                                                                                                                                                                                                                                                                      | Servicio de Microbiología Clínica (Complejo Hospitalario de Navarra, Pamplona), Instituto de Investigación Sanitaria de Navarra (IISNA)                                                                                        | SeqCOVID-SPAIN consortium/IBV(CSIC)                                                                                                                                              | Carmen Ezpeleta Baquedano, Ana Navascués, Ana Miqueliez and SeqCOVID-SPAIN consortium                                                                                                                                                                                                                                                                                  |
| EP1_ISL_893755, EP1_ISL_893764, EP1_ISL_893774, EP1_ISL_893778                                                                                                                                                                                                                                                                                                                                                                                                                                                                                                                                                                                 | Institute of Virology, Medical Center, University of Freiburg, Freiburg, Germany                                                                                                                                               | Institute of Virology, Clinical Virus Genomics, Medical Center, University of Freiburg, Freiburg, Germany                                                                        | Jonas Fuchs, Lisa Kern, Sandra Reuter, Hajo Grundmann, Marcus Panning                                                                                                                                                                                                                                                                                                  |
| EP1_ISL_894166                                                                                                                                                                                                                                                                                                                                                                                                                                                                                                                                                                                                                                 | Institute of Medical Microbiology and Hospital Hygiene                                                                                                                                                                         | Institute of Medical Microbiology and Hospital Hygiene                                                                                                                           | Prof. Dr. Achim Kaasch, Aljoscha Tersteege                                                                                                                                                                                                                                                                                                                             |
| EP1_ISL_894210                                                                                                                                                                                                                                                                                                                                                                                                                                                                                                                                                                                                                                 | KU Leuven, Rega Institute, Clinical and Epidemiological Virology                                                                                                                                                               | KU Leuven, Rega Institute, Clinical and Epidemiological Virology                                                                                                                 | Tony Wainman-Bockelanga, Bert Vanmechelen, Joan Mari-Carerras, Piet Maes                                                                                                                                                                                                                                                                                               |
| EP1_ISL_895735, EP1_ISL_895766                                                                                                                                                                                                                                                                                                                                                                                                                                                                                                                                                                                                                 | Molecular biology division, Institute of Clinical Biochemistry and Diagnostics, Charles University, Faculty of Medicine in Hradec Králové and University Hospital Hradec Králové                                               | Molecular biology division, Institute of Clinical Biochemistry and Diagnostics, Charles University, Faculty of Medicine in Hradec Králové and University Hospital Hradec Králové | Helena Kovacková, Petr Brož, Ivana Baranová, Kateřina Hirošová, Tereza Baková, Jilka Novotná, Kateřina Pahlíková, Vladimír Paška, Cooperation project with BioVendor-R&D and biotronics company BIOXSYS s.r.o.                                                                                                                                                         |
| EP1_ISL_896130, EP1_ISL_896185, EP1_ISL_896192, EP1_ISL_896197, EP1_ISL_896198, EP1_ISL_896210, EP1_ISL_896212, EP1_ISL_896213                                                                                                                                                                                                                                                                                                                                                                                                                                                                                                                 | MEPHI, Aix Marseille University                                                                                                                                                                                                | MEPHI, Aix Marseille University                                                                                                                                                  | Anthony LEVASSEUR                                                                                                                                                                                                                                                                                                                                                      |
| EP1_ISL_896379                                                                                                                                                                                                                                                                                                                                                                                                                                                                                                                                                                                                                                 | Suceara County Emergency Hospital                                                                                                                                                                                              | "Stean cel Mare" University Metagenomics Lab                                                                                                                                     | Lobuc Andrei, Gheorghita Roxana                                                                                                                                                                                                                                                                                                                                        |
| EP1_ISL_897715, EP1_ISL_897722, EP1_ISL_897731, EP1_ISL_897746, EP1_ISL_897759, EP1_ISL_897760, EP1_ISL_897762, EP1_ISL_897772, EP1_ISL_897774, EP1_ISL_897784, EP1_ISL_897793, EP1_ISL_897804, EP1_ISL_897811, EP1_ISL_897817, EP1_ISL_897819, EP1_ISL_897831, EP1_ISL_897862, EP1_ISL_897877, EP1_ISL_897908, EP1_ISL_897909, EP1_ISL_897910, EP1_ISL_897939, EP1_ISL_897944, EP1_ISL_897973                                                                                                                                                                                                                                                 | University Hospitals of Geneva, Laboratory of Virology                                                                                                                                                                         | HUG, Laboratory of Virology and the Health2030 Genome Center                                                                                                                     | Samuel Cordey, Ana Rita Goncalves, Laurent Kaiser, Lorenzo Cerutti, Henri Pegesot, Mellyssa Elias, Deborah Peret, Keiichi Harshman, Ioannis Xenarios, Emmanouil Dermizakis                                                                                                                                                                                             |
| see above                                                                                                                                                                                                                                                                                                                                                                                                                                                                                                                                                                                                                                      | University Hospitals of Geneva, Laboratory of Virology                                                                                                                                                                         | HUG, Laboratory of Virology and the Health2030 Genome Center                                                                                                                     | Samuel Cordey, Ana Rita Goncalves, Laurent Kaiser, Lorenzo Cerutti, Henri Pegesot, Mellyssa Elias, Deborah Peret, Keiichi Harshman, Ioannis Xenarios, Emmanouil Dermizakis                                                                                                                                                                                             |
| EP1_ISL_898015                                                                                                                                                                                                                                                                                                                                                                                                                                                                                                                                                                                                                                 | KU Leuven, Rega Institute, Clinical and Epidemiological Virology                                                                                                                                                               | KU Leuven, Rega Institute, Clinical and Epidemiological Virology                                                                                                                 | Tony Wainman-Bockelanga, Bert Vanmechelen, Joan Mari-Carerras, Piet Maes                                                                                                                                                                                                                                                                                               |
| EP1_ISL_898996                                                                                                                                                                                                                                                                                                                                                                                                                                                                                                                                                                                                                                 | Vollier AG                                                                                                                                                                                                                     | Department of Biosystems Science and Engineering, ETH Zurich                                                                                                                     | Christian Beisel, Sarah Nadeau, Chaoran Chen, van Topolsky, Philipp Jablonksi, Lara Fuhrmann, David Driuluss, Katharina Jahn, Tobias Schär, Ina Nissen, Natascha Santaroco, Elodie Burcklen, Christiane Beckmann, Maurice Redondo, Olivier Kober, Christoph Noppen, Sophie Seidel, Noemie Sammamata de Souza, Niko Beeremvinkel, Tanja Stadler                         |
| EP1_ISL_898998, EP1_ISL_899001, EP1_ISL_899005, EP1_ISL_899016                                                                                                                                                                                                                                                                                                                                                                                                                                                                                                                                                                                 | Vollier AG                                                                                                                                                                                                                     | Department of Biosystems Science and Engineering, ETH Zurich                                                                                                                     | Chaoran Chen, Sarah Nadeau, van Topolsky, Emmanouil Dermizakis, Keiichi Harshman, Ioannis Xenarios, Henri Pegesot, Lorenzo Cerutti, Deborah Peret, Philipp Jablonksi, Lara Fuhrmann, David Driuluss, Katharina Jahn, Christiane Beckmann, Maurice Redondo, Olivier Kober, Christoph Noppen, Sophie Seidel, Noemie Sammamata de Souza, Niko Beeremvinkel, Tanja Stadler |
| EP1_ISL_899017                                                                                                                                                                                                                                                                                                                                                                                                                                                                                                                                                                                                                                 | Vollier AG                                                                                                                                                                                                                     | Department of Biosystems Science and Engineering, ETH Zurich                                                                                                                     | Chaoran Chen, Sarah Nadeau, van Topolsky, Emmanouil Dermizakis, Keiichi Harshman, Ioannis Xenarios, Henri Pegesot, Lorenzo Cerutti, Deborah Peret, Philipp Jablonksi, Lara Fuhrmann, David Driuluss, Katharina Jahn, Christiane Beckmann, Maurice Redondo, Olivier Kober, Christoph Noppen, Sophie Seidel, Noemie Sammamata de Souza, Niko Beeremvinkel, Tanja Stadler |
| EP1_ISL_899018, EP1_ISL_899029                                                                                                                                                                                                                                                                                                                                                                                                                                                                                                                                                                                                                 | Vollier AG                                                                                                                                                                                                                     | Department of Biosystems Science and Engineering, ETH Zurich                                                                                                                     | Chaoran Chen, Sarah Nadeau, van Topolsky, Emmanouil Dermizakis, Keiichi Harshman, Ioannis Xenarios, Henri Pegesot, Lorenzo Cerutti, Deborah Peret, Philipp Jablonksi, Lara Fuhrmann, David Driuluss, Katharina Jahn, Christiane Beckmann, Maurice Redondo, Olivier Kober, Christoph Noppen, Sophie Seidel, Noemie Sammamata de Souza, Niko Beeremvinkel, Tanja Stadler |





|                                                                                                                                                                                                                                                                                                                                                                                                                                                                                                                                                                                                                                                                                                                                |                                                                                                 |                                                                                                                                                                                                                                                                                      |                                                                                                                                                                                                                                                                                                                                                                      |
|--------------------------------------------------------------------------------------------------------------------------------------------------------------------------------------------------------------------------------------------------------------------------------------------------------------------------------------------------------------------------------------------------------------------------------------------------------------------------------------------------------------------------------------------------------------------------------------------------------------------------------------------------------------------------------------------------------------------------------|-------------------------------------------------------------------------------------------------|--------------------------------------------------------------------------------------------------------------------------------------------------------------------------------------------------------------------------------------------------------------------------------------|----------------------------------------------------------------------------------------------------------------------------------------------------------------------------------------------------------------------------------------------------------------------------------------------------------------------------------------------------------------------|
| EPI_ISL_899556, EPI_ISL_899556                                                                                                                                                                                                                                                                                                                                                                                                                                                                                                                                                                                                                                                                                                 | Voilier AG                                                                                      | Department of Biosystems Science and Engineering, ETH Zürich                                                                                                                                                                                                                         | Chaoran Chen, Sarah Nadeau, Ivan Topolitsky, Emmanouil Dermitzakis, Keith Harshman, Ioannis Xenarios, Henri Peguet, Lorenzo Cerutti, Deborah Parot, Philipp Jablonski, Lara Fuhrmann, David Driess, Katharina Jahn, Christiane Beckmann, Maurice Redondo, Oliver Kobel, Christoph Noppen, Sophie Seidel, Noemie Santamaria de Souza, Niko Beerewinkel, Tanja Stadler |
| EPI_ISL_899572, EPI_ISL_899573, EPI_ISL_899590, EPI_ISL_899640                                                                                                                                                                                                                                                                                                                                                                                                                                                                                                                                                                                                                                                                 | Voilier AG                                                                                      | Department of Biosystems Science and Engineering, ETH Zürich                                                                                                                                                                                                                         | Christian Beisel, Sarah Nadeau, Chaoran Chen, Ivan Topolitsky, Philipp Jablonski, Lara Fuhrmann, David Driess, Katharina Jahn, Tobias Schär, Ina Nissen, Natascha Santaroco, Elodie Burcklen, Christiane Beckmann, Maurice Redondo, Oliver Kobel, Christoph Noppen, Sophie Seidel, Noemie Santamaria de Souza, Niko Beerewinkel, Tanja Stadler                       |
| EPI_ISL_899645                                                                                                                                                                                                                                                                                                                                                                                                                                                                                                                                                                                                                                                                                                                 | Voilier AG                                                                                      | Department of Biosystems Science and Engineering, ETH Zürich                                                                                                                                                                                                                         | Chaoran Chen, Sarah Nadeau, Ivan Topolitsky, Emmanouil Dermitzakis, Keith Harshman, Ioannis Xenarios, Henri Peguet, Lorenzo Cerutti, Deborah Parot, Philipp Jablonski, Lara Fuhrmann, David Driess, Katharina Jahn, Christiane Beckmann, Maurice Redondo, Oliver Kobel, Christoph Noppen, Sophie Seidel, Noemie Santamaria de Souza, Niko Beerewinkel, Tanja Stadler |
| EPI_ISL_899656, EPI_ISL_899657, EPI_ISL_899665, EPI_ISL_899682, EPI_ISL_899683, EPI_ISL_899690, EPI_ISL_899698, EPI_ISL_899700, EPI_ISL_899701, EPI_ISL_899702, EPI_ISL_899709, EPI_ISL_899720, EPI_ISL_899725, EPI_ISL_899728, EPI_ISL_899729, EPI_ISL_899731, EPI_ISL_899732, EPI_ISL_899735                                                                                                                                                                                                                                                                                                                                                                                                                                 | Voilier AG                                                                                      | Department of Biosystems Science and Engineering, ETH Zürich                                                                                                                                                                                                                         | Christian Beisel, Sarah Nadeau, Chaoran Chen, Ivan Topolitsky, Philipp Jablonski, Lara Fuhrmann, David Driess, Katharina Jahn, Tobias Schär, Ina Nissen, Natascha Santaroco, Elodie Burcklen, Christiane Beckmann, Maurice Redondo, Oliver Kobel, Christoph Noppen, Sophie Seidel, Noemie Santamaria de Souza, Niko Beerewinkel, Tanja Stadler                       |
| EPI_ISL_899739, EPI_ISL_899741, EPI_ISL_899742, EPI_ISL_899748                                                                                                                                                                                                                                                                                                                                                                                                                                                                                                                                                                                                                                                                 | Voilier AG                                                                                      | Department of Biosystems Science and Engineering, ETH Zürich                                                                                                                                                                                                                         | Chaoran Chen, Sarah Nadeau, Ivan Topolitsky, Emmanouil Dermitzakis, Keith Harshman, Ioannis Xenarios, Henri Peguet, Lorenzo Cerutti, Deborah Parot, Philipp Jablonski, Lara Fuhrmann, David Driess, Katharina Jahn, Christiane Beckmann, Maurice Redondo, Oliver Kobel, Christoph Noppen, Sophie Seidel, Noemie Santamaria de Souza, Niko Beerewinkel, Tanja Stadler |
| EPI_ISL_899766, EPI_ISL_899767, EPI_ISL_899772, EPI_ISL_899773, EPI_ISL_899776, EPI_ISL_899777, EPI_ISL_899782, EPI_ISL_899791, EPI_ISL_899792, EPI_ISL_899793                                                                                                                                                                                                                                                                                                                                                                                                                                                                                                                                                                 | Voilier AG                                                                                      | Department of Biosystems Science and Engineering, ETH Zürich                                                                                                                                                                                                                         | Christian Beisel, Sarah Nadeau, Chaoran Chen, Ivan Topolitsky, Philipp Jablonski, Lara Fuhrmann, David Driess, Katharina Jahn, Tobias Schär, Ina Nissen, Natascha Santaroco, Elodie Burcklen, Christiane Beckmann, Maurice Redondo, Oliver Kobel, Christoph Noppen, Sophie Seidel, Noemie Santamaria de Souza, Niko Beerewinkel, Tanja Stadler                       |
| EPI_ISL_899801, EPI_ISL_899808, EPI_ISL_899809                                                                                                                                                                                                                                                                                                                                                                                                                                                                                                                                                                                                                                                                                 | Voilier AG                                                                                      | Department of Biosystems Science and Engineering, ETH Zürich                                                                                                                                                                                                                         | Chaoran Chen, Sarah Nadeau, Ivan Topolitsky, Emmanouil Dermitzakis, Keith Harshman, Ioannis Xenarios, Henri Peguet, Lorenzo Cerutti, Deborah Parot, Philipp Jablonski, Lara Fuhrmann, David Driess, Katharina Jahn, Christiane Beckmann, Maurice Redondo, Oliver Kobel, Christoph Noppen, Sophie Seidel, Noemie Santamaria de Souza, Niko Beerewinkel, Tanja Stadler |
| EPI_ISL_899812, EPI_ISL_899815, EPI_ISL_899821, EPI_ISL_899827, EPI_ISL_899828, EPI_ISL_899829, EPI_ISL_899834, EPI_ISL_899838                                                                                                                                                                                                                                                                                                                                                                                                                                                                                                                                                                                                 | Voilier AG                                                                                      | Department of Biosystems Science and Engineering, ETH Zürich                                                                                                                                                                                                                         | Christian Beisel, Sarah Nadeau, Chaoran Chen, Ivan Topolitsky, Philipp Jablonski, Lara Fuhrmann, David Driess, Katharina Jahn, Tobias Schär, Ina Nissen, Natascha Santaroco, Elodie Burcklen, Christiane Beckmann, Maurice Redondo, Oliver Kobel, Christoph Noppen, Sophie Seidel, Noemie Santamaria de Souza, Niko Beerewinkel, Tanja Stadler                       |
| EPI_ISL_899849                                                                                                                                                                                                                                                                                                                                                                                                                                                                                                                                                                                                                                                                                                                 | Voilier AG                                                                                      | Department of Biosystems Science and Engineering, ETH Zürich                                                                                                                                                                                                                         | Chaoran Chen, Sarah Nadeau, Ivan Topolitsky, Emmanouil Dermitzakis, Keith Harshman, Ioannis Xenarios, Henri Peguet, Lorenzo Cerutti, Deborah Parot, Philipp Jablonski, Lara Fuhrmann, David Driess, Katharina Jahn, Christiane Beckmann, Maurice Redondo, Oliver Kobel, Christoph Noppen, Sophie Seidel, Noemie Santamaria de Souza, Niko Beerewinkel, Tanja Stadler |
| EPI_ISL_899851, EPI_ISL_899853                                                                                                                                                                                                                                                                                                                                                                                                                                                                                                                                                                                                                                                                                                 | Voilier AG                                                                                      | Department of Biosystems Science and Engineering, ETH Zürich                                                                                                                                                                                                                         | Chaoran Chen, Sarah Nadeau, Ivan Topolitsky, Emmanouil Dermitzakis, Keith Harshman, Ioannis Xenarios, Henri Peguet, Lorenzo Cerutti, Deborah Parot, Philipp Jablonski, Lara Fuhrmann, David Driess, Katharina Jahn, Christiane Beckmann, Maurice Redondo, Oliver Kobel, Christoph Noppen, Sophie Seidel, Noemie Santamaria de Souza, Niko Beerewinkel, Tanja Stadler |
| EPI_ISL_899855, EPI_ISL_899856, EPI_ISL_899859, EPI_ISL_899860, EPI_ISL_899861, EPI_ISL_899865                                                                                                                                                                                                                                                                                                                                                                                                                                                                                                                                                                                                                                 | Voilier AG                                                                                      | Department of Biosystems Science and Engineering, ETH Zürich                                                                                                                                                                                                                         | Christian Beisel, Sarah Nadeau, Chaoran Chen, Ivan Topolitsky, Philipp Jablonski, Lara Fuhrmann, David Driess, Katharina Jahn, Tobias Schär, Ina Nissen, Natascha Santaroco, Elodie Burcklen, Christiane Beckmann, Maurice Redondo, Oliver Kobel, Christoph Noppen, Sophie Seidel, Noemie Santamaria de Souza, Niko Beerewinkel, Tanja Stadler                       |
| EPI_ISL_899891, EPI_ISL_899896, EPI_ISL_899897, EPI_ISL_899904, EPI_ISL_899905                                                                                                                                                                                                                                                                                                                                                                                                                                                                                                                                                                                                                                                 | Voilier AG                                                                                      | Department of Biosystems Science and Engineering, ETH Zürich                                                                                                                                                                                                                         | Chaoran Chen, Sarah Nadeau, Ivan Topolitsky, Emmanouil Dermitzakis, Keith Harshman, Ioannis Xenarios, Henri Peguet, Lorenzo Cerutti, Deborah Parot, Philipp Jablonski, Lara Fuhrmann, David Driess, Katharina Jahn, Christiane Beckmann, Maurice Redondo, Oliver Kobel, Christoph Noppen, Sophie Seidel, Noemie Santamaria de Souza, Niko Beerewinkel, Tanja Stadler |
| EPI_ISL_899907, EPI_ISL_899911, EPI_ISL_899928, EPI_ISL_899934, EPI_ISL_899935, EPI_ISL_899936, EPI_ISL_899950, EPI_ISL_899951, EPI_ISL_899953, EPI_ISL_899960, EPI_ISL_899971, EPI_ISL_899972, EPI_ISL_899973, EPI_ISL_899985, EPI_ISL_899990, EPI_ISL_899993, EPI_ISL_899997, EPI_ISL_899998                                                                                                                                                                                                                                                                                                                                                                                                                                 | Voilier AG                                                                                      | Department of Biosystems Science and Engineering, ETH Zürich                                                                                                                                                                                                                         | Christian Beisel, Sarah Nadeau, Chaoran Chen, Ivan Topolitsky, Philipp Jablonski, Lara Fuhrmann, David Driess, Katharina Jahn, Tobias Schär, Ina Nissen, Natascha Santaroco, Elodie Burcklen, Christiane Beckmann, Maurice Redondo, Oliver Kobel, Christoph Noppen, Sophie Seidel, Noemie Santamaria de Souza, Niko Beerewinkel, Tanja Stadler                       |
| EPI_ISL_900008, EPI_ISL_900010, EPI_ISL_900014, EPI_ISL_900015, EPI_ISL_900019, EPI_ISL_900022                                                                                                                                                                                                                                                                                                                                                                                                                                                                                                                                                                                                                                 | Voilier AG                                                                                      | Department of Biosystems Science and Engineering, ETH Zürich                                                                                                                                                                                                                         | Chaoran Chen, Sarah Nadeau, Ivan Topolitsky, Emmanouil Dermitzakis, Keith Harshman, Ioannis Xenarios, Henri Peguet, Lorenzo Cerutti, Deborah Parot, Philipp Jablonski, Lara Fuhrmann, David Driess, Katharina Jahn, Christiane Beckmann, Maurice Redondo, Oliver Kobel, Christoph Noppen, Sophie Seidel, Noemie Santamaria de Souza, Niko Beerewinkel, Tanja Stadler |
| EPI_ISL_900024, EPI_ISL_900035, EPI_ISL_900049, EPI_ISL_900042, EPI_ISL_900051, EPI_ISL_900052                                                                                                                                                                                                                                                                                                                                                                                                                                                                                                                                                                                                                                 | Voilier AG                                                                                      | Department of Biosystems Science and Engineering, ETH Zürich                                                                                                                                                                                                                         | Chaoran Chen, Sarah Nadeau, Ivan Topolitsky, Emmanouil Dermitzakis, Keith Harshman, Ioannis Xenarios, Henri Peguet, Lorenzo Cerutti, Deborah Parot, Philipp Jablonski, Lara Fuhrmann, David Driess, Katharina Jahn, Christiane Beckmann, Maurice Redondo, Oliver Kobel, Christoph Noppen, Sophie Seidel, Noemie Santamaria de Souza, Niko Beerewinkel, Tanja Stadler |
| EPI_ISL_900546, EPI_ISL_900552                                                                                                                                                                                                                                                                                                                                                                                                                                                                                                                                                                                                                                                                                                 | MEPHI, Aix Marseille University                                                                 | CNR Virus des Infections Respiratoires - France SUD                                                                                                                                                                                                                                  | Anthony LEVASSEUR                                                                                                                                                                                                                                                                                                                                                    |
| EPI_ISL_900572                                                                                                                                                                                                                                                                                                                                                                                                                                                                                                                                                                                                                                                                                                                 | Hopital Paris Saint-Joseph                                                                      | CNR Virus des Infections Respiratoires - France SUD                                                                                                                                                                                                                                  | Antonin Bal, Gregory Destras, Gwendolyne Burfin, Hadrien Reque, Quentin Semanas, Martine Valette, Bruno Lina, Laurence Jossel                                                                                                                                                                                                                                        |
| EPI_ISL_900573                                                                                                                                                                                                                                                                                                                                                                                                                                                                                                                                                                                                                                                                                                                 | Centre Hospitalier de Guéret                                                                    | CNR Virus des Infections Respiratoires - France SUD                                                                                                                                                                                                                                  | Antonin Bal, Gregory Destras, Gwendolyne Burfin, Hadrien Reque, Quentin Semanas, Martine Valette, Bruno Lina, Sylvie Larat, Laurence Jossel                                                                                                                                                                                                                          |
| EPI_ISL_900575, EPI_ISL_900577, EPI_ISL_900583, EPI_ISL_900584, EPI_ISL_900588, EPI_ISL_900589, EPI_ISL_900591, EPI_ISL_900592, EPI_ISL_900593, EPI_ISL_900594, EPI_ISL_900595, EPI_ISL_900596, EPI_ISL_900597, EPI_ISL_900607, EPI_ISL_900608, EPI_ISL_900609, EPI_ISL_900610, EPI_ISL_900616, EPI_ISL_900619, EPI_ISL_900620, EPI_ISL_900621, EPI_ISL_900622, EPI_ISL_900626, EPI_ISL_900630, EPI_ISL_900631, EPI_ISL_900632, EPI_ISL_900633, EPI_ISL_900640, EPI_ISL_900642, EPI_ISL_900644, EPI_ISL_900647, EPI_ISL_900648, EPI_ISL_900649, EPI_ISL_900654, EPI_ISL_900656, EPI_ISL_900667, EPI_ISL_900672, EPI_ISL_900674, EPI_ISL_900679, EPI_ISL_900682, EPI_ISL_900684, EPI_ISL_900686, EPI_ISL_900689, EPI_ISL_900690 | IZSM                                                                                            | Antonio Gimaldi, Patriza Annunziata, Francesco Panerla, Bianca Maria Pieri, Valentina Bourcier, Chiara Colaninno, Maria Concetta Cuomo, Denise Di Coniglio, Lucio Di Filippo, Anna Manfredi, Marcello Salvi, Antonio Limone, Pellegrino Cerro, Antonio Balabano, Davide Cacchiarelli |                                                                                                                                                                                                                                                                                                                                                                      |
| EPI_ISL_902740, EPI_ISL_902741, EPI_ISL_902742, EPI_ISL_902743, EPI_ISL_902744, EPI_ISL_902745                                                                                                                                                                                                                                                                                                                                                                                                                                                                                                                                                                                                                                 | Hospital Universitari Germans Trias i Pujol (HUGTIP) / Fundació Lluita contra la SIDA (FLSida)  | ITSiCaixa - Can Rufi CovidSeq                                                                                                                                                                                                                                                        | Fundació ITSiCaixa, Hospital Universitari Germans Trias i Pujol(HUGTIP), 2a planta, maternal Ctra Canyet s/n, Badalona Maria Massanella, Ester Ballarà, Lida Ruiz, Nuria Izquierdo, Jorge Carrillo, Roger Farides, Julia Blanco, Joaquin Segales, Bonaventura Ciólet                                                                                                 |
| EPI_ISL_902750                                                                                                                                                                                                                                                                                                                                                                                                                                                                                                                                                                                                                                                                                                                 | Opedale "F. Spaziani" Frosinone                                                                 | INMI Lazzaro Spallanzani IRCCS                                                                                                                                                                                                                                                       | F Messina, C.E.M Gruber, B Bartolini, E Giombini, M Ruzea, O Butera, C. Gangiulo, C. Sias, A.DI Caro, MR Capobianchi                                                                                                                                                                                                                                                 |
| EPI_ISL_902752                                                                                                                                                                                                                                                                                                                                                                                                                                                                                                                                                                                                                                                                                                                 | Opedale Sandro Pertini ASL Romae                                                                | INMI Lazzaro Spallanzani IRCCS                                                                                                                                                                                                                                                       | O Butera, F Messina, C.E.M Gruber, B Bartolini, E Giombini, M Ruzea, S Romano, MC Cava, A Di Caro, MR Capobianchi                                                                                                                                                                                                                                                    |
| EPI_ISL_902892, EPI_ISL_902894, EPI_ISL_902902, EPI_ISL_902903, EPI_ISL_902904, EPI_ISL_902905                                                                                                                                                                                                                                                                                                                                                                                                                                                                                                                                                                                                                                 | Department of Virology, University of Helsinki and Helsinki University Hospital, HUSlab Finland | Department of Virology, Faculty of Medicine, University of Helsinki, Helsinki, Finland                                                                                                                                                                                               | Teemu Smura, Ravi Kant, Phuoc Trong, Hussein Abuhat, Hammit Kalilo-Kokko, Jenni Viirani, Majla Suvario, Essi Korhonen, Sari Hanmulla, Hatri Kangas, Hanna Limatainen, Satu Kurkela, Hanna Järva, Majla Lappalainen, Pekka Elonen, Olli Vapalahti                                                                                                                     |
| EPI_ISL_903491                                                                                                                                                                                                                                                                                                                                                                                                                                                                                                                                                                                                                                                                                                                 | Quest Diagnostics                                                                               | Quest Diagnostics                                                                                                                                                                                                                                                                    | Rosenthal S.H., Gerashimova A., Kagan R.M., Anderson, B., Hua, M., Lu Y., Bernstein, L.E., Livingston, K.E., Perez, A., Shahtout, D.F., Shnyakhter, I.A., Owen, R., Tanshalwan, F., Lachawan, F.                                                                                                                                                                     |
| EPI_ISL_904039                                                                                                                                                                                                                                                                                                                                                                                                                                                                                                                                                                                                                                                                                                                 | Scientific Veterinary Institute Novi Sad                                                        | Veterinary Specialized Institute "Kraljevo", Serbia                                                                                                                                                                                                                                  | Vidranovic, D., Tesovic, B., Knezevic, A., Jovanovic, T., Jankovic, M., Seker, M., Barovic Djeric, B., Petrovic, T., Volkering, J., Alonso, C.                                                                                                                                                                                                                       |

EPI\_ISL\_904493, EPI\_ISL\_904494, EPI\_ISL\_904496, EPI\_ISL\_904501, EPI\_ISL\_904502, EPI\_ISL\_904503, EPI\_ISL\_904507, EPI\_ISL\_904508, EPI\_ISL\_904510, EPI\_ISL\_904511, EPI\_ISL\_904512, EPI\_ISL\_904513, EPI\_ISL\_904514, EPI\_ISL\_904515, EPI\_ISL\_904519, EPI\_ISL\_904526, EPI\_ISL\_904527, EPI\_ISL\_904531, EPI\_ISL\_904532, EPI\_ISL\_904535, EPI\_ISL\_904536, EPI\_ISL\_904543, EPI\_ISL\_904544, EPI\_ISL\_904545, EPI\_ISL\_904546, EPI\_ISL\_904547, EPI\_ISL\_904548, EPI\_ISL\_904552, EPI\_ISL\_904554, EPI\_ISL\_904555, EPI\_ISL\_904557, EPI\_ISL\_904559, EPI\_ISL\_904560, EPI\_ISL\_904561, EPI\_ISL\_904562, EPI\_ISL\_904565, EPI\_ISL\_904572, EPI\_ISL\_904578, EPI\_ISL\_904580, EPI\_ISL\_904581, EPI\_ISL\_904590, EPI\_ISL\_904592, EPI\_ISL\_904596, EPI\_ISL\_904599, EPI\_ISL\_904599, EPI\_ISL\_904599, EPI\_ISL\_904599, EPI\_ISL\_904613, EPI\_ISL\_904624

see above

Dutch COVID-19 response team

Erasmus Medical Center

EPI\_ISL\_904627, EPI\_ISL\_904629, EPI\_ISL\_904630, EPI\_ISL\_904632, EPI\_ISL\_904633, EPI\_ISL\_904634, EPI\_ISL\_904637, EPI\_ISL\_904639, EPI\_ISL\_904641, EPI\_ISL\_904645, EPI\_ISL\_904647, EPI\_ISL\_904648, EPI\_ISL\_904649, EPI\_ISL\_904652, EPI\_ISL\_904653, EPI\_ISL\_904654, EPI\_ISL\_904655, EPI\_ISL\_904656

see above

Servicio de Microbiología, Laboratori Clínic Metropolitana Nord, Hospital Universitari Germans Trias i Pujol, Institut d'Investigació en Ciències de la Salut Germans Trias i Pujol (IGTP)

IrsCaixa - Can Ruti CovidSeq

Marc Noguera-Julian, Mariona Parera, Maria Casadella, Pilar Amengol, Francesc Catala-Moll, Roger Parades, Bonaventura Clotet Elisa Marto, Verónica Saludes, Anna Noh, Ana Pérez, Montserrat Giménez, Ignacio Blanco, Cristina Casan, Antoni E. Bordoy, Adrian Artuon

EPI\_ISL\_904769, EPI\_ISL\_904775, EPI\_ISL\_904776, EPI\_ISL\_904778, EPI\_ISL\_904791, EPI\_ISL\_904800, EPI\_ISL\_904809, EPI\_ISL\_904817, EPI\_ISL\_904819, EPI\_ISL\_904828, EPI\_ISL\_904836, EPI\_ISL\_904854, EPI\_ISL\_904882, EPI\_ISL\_904903, EPI\_ISL\_904930, EPI\_ISL\_904931, EPI\_ISL\_904934, EPI\_ISL\_904938, EPI\_ISL\_906001, EPI\_ISL\_906002, EPI\_ISL\_906003, EPI\_ISL\_906014, EPI\_ISL\_906036, EPI\_ISL\_906051, EPI\_ISL\_906052, EPI\_ISL\_906057, EPI\_ISL\_906058, EPI\_ISL\_906061, EPI\_ISL\_906063, EPI\_ISL\_906112, EPI\_ISL\_906275, EPI\_ISL\_906286, EPI\_ISL\_906304, EPI\_ISL\_906307, EPI\_ISL\_906308, EPI\_ISL\_906320, EPI\_ISL\_906323, EPI\_ISL\_906332, EPI\_ISL\_906335, EPI\_ISL\_906339, EPI\_ISL\_906341, EPI\_ISL\_906348, EPI\_ISL\_906349, EPI\_ISL\_906354, EPI\_ISL\_906355, EPI\_ISL\_906356, EPI\_ISL\_906372, EPI\_ISL\_906380, EPI\_ISL\_905984, EPI\_ISL\_905993, EPI\_ISL\_905994, EPI\_ISL\_905406, EPI\_ISL\_905408, EPI\_ISL\_905409, EPI\_ISL\_905410, EPI\_ISL\_905411, EPI\_ISL\_905414, EPI\_ISL\_905423, EPI\_ISL\_905430, EPI\_ISL\_905434, EPI\_ISL\_905439, EPI\_ISL\_905440, EPI\_ISL\_905444, EPI\_ISL\_905446, EPI\_ISL\_905459, EPI\_ISL\_905460, EPI\_ISL\_905464, EPI\_ISL\_905470, EPI\_ISL\_905483, EPI\_ISL\_905484, EPI\_ISL\_905502, EPI\_ISL\_905520, EPI\_ISL\_905525, EPI\_ISL\_905564, EPI\_ISL\_905572, EPI\_ISL\_905574, EPI\_ISL\_905575, EPI\_ISL\_905576, EPI\_ISL\_905624, EPI\_ISL\_906637, EPI\_ISL\_906697, EPI\_ISL\_905701, EPI\_ISL\_905711

see above

Dutch COVID-19 response team

National Institute for Public Health and the Environment (RIVM)

Adam Meijer, Harry Vermeena, Dirk Eggink, Jeroen Cremer, Sharon van den Bink, Bas van der Veer, Annemarie van den Brandt, Florian Zwagemaker, Dennis Schmitz, Chantal Reuskens, on behalf of the national COVID-19 response team

EPI\_ISL\_905740

NZCOZ LM Diagnostyka Cstochowa

National Institute of Public Health - National Institute of Hygiene

Wolkowicz Tomasz, Zacharczuk Katarzyna

EPI\_ISL\_905752

Laboratorium Mikrobiologiczne SYNEVO

National Institute of Public Health - National Institute of Hygiene

Wolkowicz Tomasz, Zacharczuk Katarzyna

EPI\_ISL\_905755

National Institute of Public Health - National Institute of Hygiene

National Institute of Public Health - National Institute of Hygiene

Wolkowicz Tomasz, Zacharczuk Katarzyna

We gratefully acknowledge the following Authors from the Originating laboratories responsible for obtaining the specimens, as well as the Submitting laboratories where the genome data were generated and shared via GISAID, on which this research is based.

All Submitters of data may be contacted directly via [www.gisaid.org](http://www.gisaid.org)

Authors are sorted alphabetically.

| Accession ID                                                                                                                                   | Originating Laboratory                                                    | Submitting Laboratory                                                      | Authors                                                                                                                                                                                                                                                                                                                                                                                                                                                                                                                                                                                                                         |
|------------------------------------------------------------------------------------------------------------------------------------------------|---------------------------------------------------------------------------|----------------------------------------------------------------------------|---------------------------------------------------------------------------------------------------------------------------------------------------------------------------------------------------------------------------------------------------------------------------------------------------------------------------------------------------------------------------------------------------------------------------------------------------------------------------------------------------------------------------------------------------------------------------------------------------------------------------------|
| EPI_ISL_756136, EPI_ISL_756141, EPI_ISL_756142, EPI_ISL_756143, EPI_ISL_756152, EPI_ISL_756153, EPI_ISL_756156, EPI_ISL_756157, EPI_ISL_756159 | Respiratory Virus Unit, National Infection Service, Public Health England | COVID-19 Genomics UK (COG-UK) Consortium                                   | Xiaoyun Fan, Matt Storey, Nikki Freed, Muhammad Faisal, Jing Wang, Hernes Peszer, Anja Werner, Antje van der Linden, Ario Upton, Chris Mansell, David Hammer, Dragana Dimkovic, Gary McAuliffe, Hana Sofia Andersson, James Usner, Jill Strimwood, Joeri Freeman, Julia Howard, Juliet Eryi, Mary Dalmeida, Matt Bakstien, Matthew Rogers, Max Bloomfield, Michael Addie, Michelle Barr, Sally Roberts, Sarah-Jehannes, Sharmini Muktaiyan, Susan Moppitt, Susan Taylor, Timothy Blackmore, Van Sahyandeni, Veronica Payne, Virginia Hope, Erasmus Smil, Lauren Jelic, Olin Stlander, Joep de Gigt<br>PHE Covid Sequencing Team |
| EPI_ISL_756378                                                                                                                                 | Lighthouse Lab in Alderley Park                                           | Wellcome Sanger Institute for the COVID-19 Genomics UK (COG-UK) Consortium | Jacquelyn Wynn, Mairead Hyland, The Lighthouse Lab in Alderley Park and Alex Alderton, Roberto Amato, Sonia Goncalves, Ewan Harrison, David K Jackson, Ian Johnston, Dominic Kwiatkowski, Cordelia Langford, John Sillitoe on behalf of the Wellcome Sanger Institute COVID-19 Surveillance Team                                                                                                                                                                                                                                                                                                                                |
| EPI_ISL_756392, EPI_ISL_756403                                                                                                                 | Lighthouse Lab in Cambridge                                               | Wellcome Sanger Institute for the COVID-19 Genomics UK (COG-UK) Consortium | Robb Howes, The Lighthouse Lab in Cambridge and Alex Alderton, Roberto Amato, Sonia Goncalves, Ewan Harrison, David K Jackson, Ian Johnston, Dominic Kwiatkowski, Cordelia Langford, John Sillitoe on behalf of the Wellcome Sanger Institute COVID-19 Surveillance Team                                                                                                                                                                                                                                                                                                                                                        |
| EPI_ISL_756408, EPI_ISL_756414                                                                                                                 | Lighthouse Lab in Alderley Park                                           | Wellcome Sanger Institute for the COVID-19 Genomics UK (COG-UK) Consortium | Jacquelyn Wynn, Mairead Hyland, The Lighthouse Lab in Alderley Park and Alex Alderton, Roberto Amato, Sonia Goncalves, Ewan Harrison, David K Jackson, Ian Johnston, Dominic Kwiatkowski, Cordelia Langford, John Sillitoe on behalf of the Wellcome Sanger Institute COVID-19 Surveillance Team                                                                                                                                                                                                                                                                                                                                |
| EPI_ISL_756429                                                                                                                                 | Lighthouse Lab in Cambridge                                               | Wellcome Sanger Institute for the COVID-19 Genomics UK (COG-UK) Consortium | Robb Howes, The Lighthouse Lab in Cambridge and Alex Alderton, Roberto Amato, Sonia Goncalves, Ewan Harrison, David K Jackson, Ian Johnston, Dominic Kwiatkowski, Cordelia Langford, John Sillitoe on behalf of the Wellcome Sanger Institute COVID-19 Surveillance Team                                                                                                                                                                                                                                                                                                                                                        |
| EPI_ISL_756435                                                                                                                                 | Lighthouse Lab in Alderley Park                                           | Wellcome Sanger Institute for the COVID-19 Genomics UK (COG-UK) Consortium | Jacquelyn Wynn, Mairead Hyland, The Lighthouse Lab in Alderley Park and Alex Alderton, Roberto Amato, Sonia Goncalves, Ewan Harrison, David K Jackson, Ian Johnston, Dominic Kwiatkowski, Cordelia Langford, John Sillitoe on behalf of the Wellcome Sanger Institute COVID-19 Surveillance Team                                                                                                                                                                                                                                                                                                                                |
| EPI_ISL_756439                                                                                                                                 | Lighthouse Lab in Cambridge                                               | Wellcome Sanger Institute for the COVID-19 Genomics UK (COG-UK) Consortium | Robb Howes, The Lighthouse Lab in Cambridge and Alex Alderton, Roberto Amato, Sonia Goncalves, Ewan Harrison, David K Jackson, Ian Johnston, Dominic Kwiatkowski, Cordelia Langford, John Sillitoe on behalf of the Wellcome Sanger Institute COVID-19 Surveillance Team                                                                                                                                                                                                                                                                                                                                                        |
| EPI_ISL_756452, EPI_ISL_756459                                                                                                                 | Lighthouse Lab in Alderley Park                                           | Wellcome Sanger Institute for the COVID-19 Genomics UK (COG-UK) Consortium | Jacquelyn Wynn, Mairead Hyland, The Lighthouse Lab in Alderley Park and Alex Alderton, Roberto Amato, Sonia Goncalves, Ewan Harrison, David K Jackson, Ian Johnston, Dominic Kwiatkowski, Cordelia Langford, John Sillitoe on behalf of the Wellcome Sanger Institute COVID-19 Surveillance Team                                                                                                                                                                                                                                                                                                                                |
| EPI_ISL_756467                                                                                                                                 | Lighthouse Lab in Cambridge                                               | Wellcome Sanger Institute for the COVID-19 Genomics UK (COG-UK) Consortium | Robb Howes, The Lighthouse Lab in Cambridge and Alex Alderton, Roberto Amato, Sonia Goncalves, Ewan Harrison, David K Jackson, Ian Johnston, Dominic Kwiatkowski, Cordelia Langford, John Sillitoe on behalf of the Wellcome Sanger Institute COVID-19 Surveillance Team                                                                                                                                                                                                                                                                                                                                                        |
| EPI_ISL_756471, EPI_ISL_756479, EPI_ISL_756482, EPI_ISL_756483                                                                                 | Lighthouse Lab in Alderley Park                                           | Wellcome Sanger Institute for the COVID-19 Genomics UK (COG-UK) Consortium | Jacquelyn Wynn, Mairead Hyland, The Lighthouse Lab in Alderley Park and Alex Alderton, Roberto Amato, Sonia Goncalves, Ewan Harrison, David K Jackson, Ian Johnston, Dominic Kwiatkowski, Cordelia Langford, John Sillitoe on behalf of the Wellcome Sanger Institute COVID-19 Surveillance Team                                                                                                                                                                                                                                                                                                                                |
| EPI_ISL_756487                                                                                                                                 | Lighthouse Lab in Cambridge                                               | Wellcome Sanger Institute for the COVID-19 Genomics UK (COG-UK) Consortium | Robb Howes, The Lighthouse Lab in Cambridge and Alex Alderton, Roberto Amato, Sonia Goncalves, Ewan Harrison, David K Jackson, Ian Johnston, Dominic Kwiatkowski, Cordelia Langford, John Sillitoe on behalf of the Wellcome Sanger Institute COVID-19 Surveillance Team                                                                                                                                                                                                                                                                                                                                                        |
| EPI_ISL_756503, EPI_ISL_756514, EPI_ISL_756520, EPI_ISL_756526, EPI_ISL_756527, EPI_ISL_756530                                                 | Lighthouse Lab in Alderley Park                                           | Wellcome Sanger Institute for the COVID-19 Genomics UK (COG-UK) Consortium | Jacquelyn Wynn, Mairead Hyland, The Lighthouse Lab in Alderley Park and Alex Alderton, Roberto Amato, Sonia Goncalves, Ewan Harrison, David K Jackson, Ian Johnston, Dominic Kwiatkowski, Cordelia Langford, John Sillitoe on behalf of the Wellcome Sanger Institute COVID-19 Surveillance Team                                                                                                                                                                                                                                                                                                                                |
| EPI_ISL_756535                                                                                                                                 | Lighthouse Lab in Cambridge                                               | Wellcome Sanger Institute for the COVID-19 Genomics UK (COG-UK) Consortium | Robb Howes, The Lighthouse Lab in Cambridge and Alex Alderton, Roberto Amato, Sonia Goncalves, Ewan Harrison, David K Jackson, Ian Johnston, Dominic Kwiatkowski, Cordelia Langford, John Sillitoe on behalf of the Wellcome Sanger Institute COVID-19 Surveillance Team                                                                                                                                                                                                                                                                                                                                                        |
| EPI_ISL_756557, EPI_ISL_756563, EPI_ISL_756575                                                                                                 | Lighthouse Lab in Alderley Park                                           | Wellcome Sanger Institute for the COVID-19 Genomics UK (COG-UK) Consortium | Jacquelyn Wynn, Mairead Hyland, The Lighthouse Lab in Alderley Park and Alex Alderton, Roberto Amato, Sonia Goncalves, Ewan Harrison, David K Jackson, Ian Johnston, Dominic Kwiatkowski, Cordelia Langford, John Sillitoe on behalf of the Wellcome Sanger Institute COVID-19 Surveillance Team                                                                                                                                                                                                                                                                                                                                |
| EPI_ISL_756589                                                                                                                                 | Lighthouse Lab in Cambridge                                               | Wellcome Sanger Institute for the COVID-19 Genomics UK (COG-UK) Consortium | Robb Howes, The Lighthouse Lab in Cambridge and Alex Alderton, Roberto Amato, Sonia Goncalves, Ewan Harrison, David K Jackson, Ian Johnston, Dominic Kwiatkowski, Cordelia Langford, John Sillitoe on behalf of the Wellcome Sanger Institute COVID-19 Surveillance Team                                                                                                                                                                                                                                                                                                                                                        |
| EPI_ISL_756639, EPI_ISL_756639, EPI_ISL_756602, EPI_ISL_756616                                                                                 | Lighthouse Lab in Alderley Park                                           | Wellcome Sanger Institute for the COVID-19 Genomics UK (COG-UK) Consortium | Jacquelyn Wynn, Mairead Hyland, The Lighthouse Lab in Alderley Park and Alex Alderton, Roberto Amato, Sonia Goncalves, Ewan Harrison, David K Jackson, Ian Johnston, Dominic Kwiatkowski, Cordelia Langford, John Sillitoe on behalf of the Wellcome Sanger Institute COVID-19 Surveillance Team                                                                                                                                                                                                                                                                                                                                |
| EPI_ISL_756628                                                                                                                                 | Lighthouse Lab in Cambridge                                               | Wellcome Sanger Institute for the COVID-19 Genomics UK (COG-UK) Consortium | Robb Howes, The Lighthouse Lab in Cambridge and Alex Alderton, Roberto Amato, Sonia Goncalves, Ewan Harrison, David K Jackson, Ian Johnston, Dominic Kwiatkowski, Cordelia Langford, John Sillitoe on behalf of the Wellcome Sanger Institute COVID-19 Surveillance Team                                                                                                                                                                                                                                                                                                                                                        |
| EPI_ISL_756639, EPI_ISL_756640, EPI_ISL_756648, EPI_ISL_756651, EPI_ISL_756657, EPI_ISL_756658, EPI_ISL_756683, EPI_ISL_756685, EPI_ISL_756686 | Lighthouse Lab in Alderley Park                                           | Wellcome Sanger Institute for the COVID-19 Genomics UK (COG-UK) Consortium | Jacquelyn Wynn, Mairead Hyland, The Lighthouse Lab in Alderley Park and Alex Alderton, Roberto Amato, Sonia Goncalves, Ewan Harrison, David K Jackson, Ian Johnston, Dominic Kwiatkowski, Cordelia Langford, John Sillitoe on behalf of the Wellcome Sanger Institute COVID-19 Surveillance Team                                                                                                                                                                                                                                                                                                                                |
| EPI_ISL_756690                                                                                                                                 | Lighthouse Lab in Cambridge                                               | Wellcome Sanger Institute for the COVID-19 Genomics UK (COG-UK) Consortium | Robb Howes, The Lighthouse Lab in Cambridge and Alex Alderton, Roberto Amato, Sonia Goncalves, Ewan Harrison, David K Jackson, Ian Johnston, Dominic Kwiatkowski, Cordelia Langford, John Sillitoe on behalf of the Wellcome Sanger Institute COVID-19 Surveillance Team                                                                                                                                                                                                                                                                                                                                                        |
| EPI_ISL_756694, EPI_ISL_756701                                                                                                                 | Lighthouse Lab in Alderley Park                                           | Wellcome Sanger Institute for the COVID-19 Genomics UK (COG-UK) Consortium | Jacquelyn Wynn, Mairead Hyland, The Lighthouse Lab in Alderley Park and Alex Alderton, Roberto Amato, Sonia Goncalves, Ewan Harrison, David K Jackson, Ian Johnston, Dominic Kwiatkowski, Cordelia Langford, John Sillitoe on behalf of the Wellcome Sanger Institute COVID-19 Surveillance Team                                                                                                                                                                                                                                                                                                                                |
| EPI_ISL_756702                                                                                                                                 | Lighthouse Lab in Cambridge                                               | Wellcome Sanger Institute for the COVID-19 Genomics UK (COG-UK) Consortium | Robb Howes, The Lighthouse Lab in Cambridge and Alex Alderton, Roberto Amato, Sonia Goncalves, Ewan Harrison, David K Jackson, Ian Johnston, Dominic Kwiatkowski, Cordelia Langford, John Sillitoe on behalf of the Wellcome Sanger Institute COVID-19 Surveillance Team                                                                                                                                                                                                                                                                                                                                                        |
| EPI_ISL_756725                                                                                                                                 | Lighthouse Lab in Milton Keynes                                           | Wellcome Sanger Institute for the COVID-19 Genomics UK (COG-UK) Consortium | Harper VanSteenhouse, Yurni Kasai, David Gray, Carol Clugston, Anna Dominiczak and Alex Alderton, Roberto Amato, Sonia Goncalves, Ewan Harrison, David K Jackson, Ian Johnston, Dominic Kwiatkowski, Cordelia Langford, John Sillitoe on behalf of the Wellcome Sanger Institute COVID-19 Surveillance Team                                                                                                                                                                                                                                                                                                                     |
| EPI_ISL_756748, EPI_ISL_756761                                                                                                                 | Lighthouse Lab in Glasgow                                                 | Wellcome Sanger Institute for the COVID-19 Genomics UK (COG-UK) Consortium | Harper VanSteenhouse, Yurni Kasai, David Gray, Carol Clugston, Anna Dominiczak and Alex Alderton, Roberto Amato, Sonia Goncalves, Ewan Harrison, David K Jackson, Ian Johnston, Dominic Kwiatkowski, Cordelia Langford, John Sillitoe on behalf of the Wellcome Sanger Institute COVID-19 Surveillance Team                                                                                                                                                                                                                                                                                                                     |
| EPI_ISL_756770, EPI_ISL_756787, EPI_ISL_756798, EPI_ISL_756816, EPI_ISL_756818                                                                 | Lighthouse Lab in Milton Keynes                                           | Wellcome Sanger Institute for the COVID-19 Genomics UK (COG-UK) Consortium | Harper VanSteenhouse, Yurni Kasai, David Gray, Carol Clugston, Anna Dominiczak and Alex Alderton, Roberto Amato, Sonia Goncalves, Ewan Harrison, David K Jackson, Ian Johnston, Dominic Kwiatkowski, Cordelia Langford, John Sillitoe on behalf of the Wellcome Sanger Institute COVID-19 Surveillance Team                                                                                                                                                                                                                                                                                                                     |

|                                                                                                                                                                                                                                                                                                                                                                                                                                                                                                                                                                                                                                                                                                                                                                                                                                                                                                                                                                                                                                                                                                                                                                                                                                                                                                                                                                                                                                                                                                                                                                                                                                                                                                                                                                                                                                                                                                                                                                                                                                                                                |                                                                                                                                        |                                                                                                                                                                                                                                                                                                              |                                                                                                                                                                                                                                                                                                              |
|--------------------------------------------------------------------------------------------------------------------------------------------------------------------------------------------------------------------------------------------------------------------------------------------------------------------------------------------------------------------------------------------------------------------------------------------------------------------------------------------------------------------------------------------------------------------------------------------------------------------------------------------------------------------------------------------------------------------------------------------------------------------------------------------------------------------------------------------------------------------------------------------------------------------------------------------------------------------------------------------------------------------------------------------------------------------------------------------------------------------------------------------------------------------------------------------------------------------------------------------------------------------------------------------------------------------------------------------------------------------------------------------------------------------------------------------------------------------------------------------------------------------------------------------------------------------------------------------------------------------------------------------------------------------------------------------------------------------------------------------------------------------------------------------------------------------------------------------------------------------------------------------------------------------------------------------------------------------------------------------------------------------------------------------------------------------------------|----------------------------------------------------------------------------------------------------------------------------------------|--------------------------------------------------------------------------------------------------------------------------------------------------------------------------------------------------------------------------------------------------------------------------------------------------------------|--------------------------------------------------------------------------------------------------------------------------------------------------------------------------------------------------------------------------------------------------------------------------------------------------------------|
| EP1_ISL_756924                                                                                                                                                                                                                                                                                                                                                                                                                                                                                                                                                                                                                                                                                                                                                                                                                                                                                                                                                                                                                                                                                                                                                                                                                                                                                                                                                                                                                                                                                                                                                                                                                                                                                                                                                                                                                                                                                                                                                                                                                                                                 | Lighthouse Lab in Glasgow                                                                                                              | Wellcome Sanger Institute for the COVID-19 Genomics UK (COG-UK) Consortium                                                                                                                                                                                                                                   | Harper VanSteenhouse, Yurni Kasai, David Gray, Carol Clugston, Anna Dominiczak and Alex Alderton, Roberto Amato, Sonia Goncalves, Ewan Harrison, David K. Jackson, Ian Johnston, Dominic Kwiatkowski, Cordelia Langford, John Sillitoe on behalf of the Wellcome Sanger Institute COVID-19 Surveillance Team |
| EP1_ISL_756925                                                                                                                                                                                                                                                                                                                                                                                                                                                                                                                                                                                                                                                                                                                                                                                                                                                                                                                                                                                                                                                                                                                                                                                                                                                                                                                                                                                                                                                                                                                                                                                                                                                                                                                                                                                                                                                                                                                                                                                                                                                                 | Lighthouse Lab in Milton Keynes                                                                                                        | Wellcome Sanger Institute for the COVID-19 Genomics UK (COG-UK) Consortium                                                                                                                                                                                                                                   | The Lighthouse Lab in Milton Keynes and Alex Alderton, Roberto Amato, Sonia Goncalves, Ewan Harrison, David K. Jackson, Ian Johnston, Dominic Kwiatkowski, Cordelia Langford, John Sillitoe on behalf of the Wellcome Sanger Institute COVID-19 Surveillance Team                                            |
| EP1_ISL_756933                                                                                                                                                                                                                                                                                                                                                                                                                                                                                                                                                                                                                                                                                                                                                                                                                                                                                                                                                                                                                                                                                                                                                                                                                                                                                                                                                                                                                                                                                                                                                                                                                                                                                                                                                                                                                                                                                                                                                                                                                                                                 | Lighthouse Lab in Glasgow                                                                                                              | Wellcome Sanger Institute for the COVID-19 Genomics UK (COG-UK) Consortium                                                                                                                                                                                                                                   | Harper VanSteenhouse, Yurni Kasai, David Gray, Carol Clugston, Anna Dominiczak and Alex Alderton, Roberto Amato, Sonia Goncalves, Ewan Harrison, David K. Jackson, Ian Johnston, Dominic Kwiatkowski, Cordelia Langford, John Sillitoe on behalf of the Wellcome Sanger Institute COVID-19 Surveillance Team |
| EP1_ISL_756937, EP1_ISL_756941, EP1_ISL_756944, EP1_ISL_756950                                                                                                                                                                                                                                                                                                                                                                                                                                                                                                                                                                                                                                                                                                                                                                                                                                                                                                                                                                                                                                                                                                                                                                                                                                                                                                                                                                                                                                                                                                                                                                                                                                                                                                                                                                                                                                                                                                                                                                                                                 | Lighthouse Lab in Milton Keynes                                                                                                        | Wellcome Sanger Institute for the COVID-19 Genomics UK (COG-UK) Consortium                                                                                                                                                                                                                                   | The Lighthouse Lab in Milton Keynes and Alex Alderton, Roberto Amato, Sonia Goncalves, Ewan Harrison, David K. Jackson, Ian Johnston, Dominic Kwiatkowski, Cordelia Langford, John Sillitoe on behalf of the Wellcome Sanger Institute COVID-19 Surveillance Team                                            |
| EP1_ISL_756988, EP1_ISL_756873                                                                                                                                                                                                                                                                                                                                                                                                                                                                                                                                                                                                                                                                                                                                                                                                                                                                                                                                                                                                                                                                                                                                                                                                                                                                                                                                                                                                                                                                                                                                                                                                                                                                                                                                                                                                                                                                                                                                                                                                                                                 | Lighthouse Lab in Milton Keynes                                                                                                        | Wellcome Sanger Institute for the COVID-19 Genomics UK (COG-UK) Consortium                                                                                                                                                                                                                                   | The Lighthouse Lab in Milton Keynes and Alex Alderton, Roberto Amato, Sonia Goncalves, Ewan Harrison, David K. Jackson, Ian Johnston, Dominic Kwiatkowski, Cordelia Langford, John Sillitoe on behalf of the Wellcome Sanger Institute COVID-19 Surveillance Team                                            |
| EP1_ISL_756979, EP1_ISL_756997, EP1_ISL_756923, EP1_ISL_756940                                                                                                                                                                                                                                                                                                                                                                                                                                                                                                                                                                                                                                                                                                                                                                                                                                                                                                                                                                                                                                                                                                                                                                                                                                                                                                                                                                                                                                                                                                                                                                                                                                                                                                                                                                                                                                                                                                                                                                                                                 | Lighthouse Lab in Glasgow                                                                                                              | Wellcome Sanger Institute for the COVID-19 Genomics UK (COG-UK) Consortium                                                                                                                                                                                                                                   | Harper VanSteenhouse, Yurni Kasai, David Gray, Carol Clugston, Anna Dominiczak and Alex Alderton, Roberto Amato, Sonia Goncalves, Ewan Harrison, David K. Jackson, Ian Johnston, Dominic Kwiatkowski, Cordelia Langford, John Sillitoe on behalf of the Wellcome Sanger Institute COVID-19 Surveillance Team |
| EP1_ISL_756944                                                                                                                                                                                                                                                                                                                                                                                                                                                                                                                                                                                                                                                                                                                                                                                                                                                                                                                                                                                                                                                                                                                                                                                                                                                                                                                                                                                                                                                                                                                                                                                                                                                                                                                                                                                                                                                                                                                                                                                                                                                                 | Lighthouse Lab in Milton Keynes                                                                                                        | Wellcome Sanger Institute for the COVID-19 Genomics UK (COG-UK) Consortium                                                                                                                                                                                                                                   | The Lighthouse Lab in Milton Keynes and Alex Alderton, Roberto Amato, Sonia Goncalves, Ewan Harrison, David K. Jackson, Ian Johnston, Dominic Kwiatkowski, Cordelia Langford, John Sillitoe on behalf of the Wellcome Sanger Institute COVID-19 Surveillance Team                                            |
| EP1_ISL_756947, EP1_ISL_756959                                                                                                                                                                                                                                                                                                                                                                                                                                                                                                                                                                                                                                                                                                                                                                                                                                                                                                                                                                                                                                                                                                                                                                                                                                                                                                                                                                                                                                                                                                                                                                                                                                                                                                                                                                                                                                                                                                                                                                                                                                                 | Lighthouse Lab in Glasgow                                                                                                              | Wellcome Sanger Institute for the COVID-19 Genomics UK (COG-UK) Consortium                                                                                                                                                                                                                                   | Harper VanSteenhouse, Yurni Kasai, David Gray, Carol Clugston, Anna Dominiczak and Alex Alderton, Roberto Amato, Sonia Goncalves, Ewan Harrison, David K. Jackson, Ian Johnston, Dominic Kwiatkowski, Cordelia Langford, John Sillitoe on behalf of the Wellcome Sanger Institute COVID-19 Surveillance Team |
| EP1_ISL_756980, EP1_ISL_756985                                                                                                                                                                                                                                                                                                                                                                                                                                                                                                                                                                                                                                                                                                                                                                                                                                                                                                                                                                                                                                                                                                                                                                                                                                                                                                                                                                                                                                                                                                                                                                                                                                                                                                                                                                                                                                                                                                                                                                                                                                                 | Lighthouse Lab in Milton Keynes                                                                                                        | Wellcome Sanger Institute for the COVID-19 Genomics UK (COG-UK) Consortium                                                                                                                                                                                                                                   | The Lighthouse Lab in Milton Keynes and Alex Alderton, Roberto Amato, Sonia Goncalves, Ewan Harrison, David K. Jackson, Ian Johnston, Dominic Kwiatkowski, Cordelia Langford, John Sillitoe on behalf of the Wellcome Sanger Institute COVID-19 Surveillance Team                                            |
| EP1_ISL_756998                                                                                                                                                                                                                                                                                                                                                                                                                                                                                                                                                                                                                                                                                                                                                                                                                                                                                                                                                                                                                                                                                                                                                                                                                                                                                                                                                                                                                                                                                                                                                                                                                                                                                                                                                                                                                                                                                                                                                                                                                                                                 | Lighthouse Lab in Glasgow                                                                                                              | Wellcome Sanger Institute for the COVID-19 Genomics UK (COG-UK) Consortium                                                                                                                                                                                                                                   | Harper VanSteenhouse, Yurni Kasai, David Gray, Carol Clugston, Anna Dominiczak and Alex Alderton, Roberto Amato, Sonia Goncalves, Ewan Harrison, David K. Jackson, Ian Johnston, Dominic Kwiatkowski, Cordelia Langford, John Sillitoe on behalf of the Wellcome Sanger Institute COVID-19 Surveillance Team |
| EP1_ISL_757001                                                                                                                                                                                                                                                                                                                                                                                                                                                                                                                                                                                                                                                                                                                                                                                                                                                                                                                                                                                                                                                                                                                                                                                                                                                                                                                                                                                                                                                                                                                                                                                                                                                                                                                                                                                                                                                                                                                                                                                                                                                                 | Lighthouse Lab in Milton Keynes                                                                                                        | Wellcome Sanger Institute for the COVID-19 Genomics UK (COG-UK) Consortium                                                                                                                                                                                                                                   | The Lighthouse Lab in Milton Keynes and Alex Alderton, Roberto Amato, Sonia Goncalves, Ewan Harrison, David K. Jackson, Ian Johnston, Dominic Kwiatkowski, Cordelia Langford, John Sillitoe on behalf of the Wellcome Sanger Institute COVID-19 Surveillance Team                                            |
| EP1_ISL_757011, EP1_ISL_757012, EP1_ISL_757018, EP1_ISL_757032, EP1_ISL_757035, EP1_ISL_757037, EP1_ISL_757039, EP1_ISL_757042, EP1_ISL_757044, EP1_ISL_757045, EP1_ISL_757056, EP1_ISL_757058, EP1_ISL_757062, EP1_ISL_757063, EP1_ISL_757064, EP1_ISL_757065, EP1_ISL_757066, EP1_ISL_757067, EP1_ISL_757070, EP1_ISL_757073, EP1_ISL_757074, EP1_ISL_757075, EP1_ISL_757076, EP1_ISL_757078, EP1_ISL_757080, EP1_ISL_757081, EP1_ISL_757082, EP1_ISL_757083, EP1_ISL_757084, EP1_ISL_757087, EP1_ISL_757088, EP1_ISL_757090, EP1_ISL_757101, EP1_ISL_757102, EP1_ISL_757103, EP1_ISL_757107, EP1_ISL_757111, EP1_ISL_757112, EP1_ISL_757113, EP1_ISL_757118, EP1_ISL_757121, EP1_ISL_757122, EP1_ISL_757123, EP1_ISL_757124, EP1_ISL_757125, EP1_ISL_757126, EP1_ISL_757127, EP1_ISL_757131, EP1_ISL_757132, EP1_ISL_757134, EP1_ISL_757135, EP1_ISL_757136, EP1_ISL_757137, EP1_ISL_757138, EP1_ISL_757139, EP1_ISL_757141, EP1_ISL_757142, EP1_ISL_757144, EP1_ISL_757145, EP1_ISL_757146, EP1_ISL_757147, EP1_ISL_757148, EP1_ISL_757149, EP1_ISL_757150, EP1_ISL_757153, EP1_ISL_757154, EP1_ISL_757156, EP1_ISL_757160, EP1_ISL_757162, EP1_ISL_757165, EP1_ISL_757166, EP1_ISL_757167, EP1_ISL_757168, EP1_ISL_757169, EP1_ISL_757170, EP1_ISL_757171, EP1_ISL_757172, EP1_ISL_757174, EP1_ISL_757175, EP1_ISL_757176, EP1_ISL_757177, EP1_ISL_757178, EP1_ISL_757181, EP1_ISL_757182, EP1_ISL_757183, EP1_ISL_757188, EP1_ISL_757191, EP1_ISL_757194, EP1_ISL_757196, EP1_ISL_757198, EP1_ISL_757200, EP1_ISL_757201, EP1_ISL_757205, EP1_ISL_757206, EP1_ISL_757207, EP1_ISL_757208, EP1_ISL_757212, EP1_ISL_757213, EP1_ISL_757214, EP1_ISL_757215, EP1_ISL_757216, EP1_ISL_757219, EP1_ISL_757222, EP1_ISL_757225, EP1_ISL_757228, EP1_ISL_757229, EP1_ISL_757232, EP1_ISL_757233, EP1_ISL_757237, EP1_ISL_757238, EP1_ISL_757239, EP1_ISL_757244, EP1_ISL_757251, EP1_ISL_757252, EP1_ISL_757255, EP1_ISL_757256, EP1_ISL_757258, EP1_ISL_757261, EP1_ISL_757262, EP1_ISL_757269, EP1_ISL_757271, EP1_ISL_757273, EP1_ISL_757275, EP1_ISL_757281, EP1_ISL_757282 | Wellcome Sanger Institute for the COVID-19 Genomics UK (COG-UK) Consortium                                                             | Harper VanSteenhouse, Yurni Kasai, David Gray, Carol Clugston, Anna Dominiczak and Alex Alderton, Roberto Amato, Sonia Goncalves, Ewan Harrison, David K. Jackson, Ian Johnston, Dominic Kwiatkowski, Cordelia Langford, John Sillitoe on behalf of the Wellcome Sanger Institute COVID-19 Surveillance Team |                                                                                                                                                                                                                                                                                                              |
| EP1_ISL_757273                                                                                                                                                                                                                                                                                                                                                                                                                                                                                                                                                                                                                                                                                                                                                                                                                                                                                                                                                                                                                                                                                                                                                                                                                                                                                                                                                                                                                                                                                                                                                                                                                                                                                                                                                                                                                                                                                                                                                                                                                                                                 | Department of Virology and Immunology, University of Helsinki and Helsinki University Hospital, HUSLAB Finland                         | Department of Virology, Faculty of Medicine, University of Helsinki, Helsinki, Finland                                                                                                                                                                                                                       | Teemu Snnur, Ravi Kant, Phuoc Tuong, Hussain Alburkat, Hamimah Kallo-Kokko, Jenni Vitanen, Maija Suvario, Sari Hamuda, Hani Kargas, Pekka Eliolien, Olli Vapalahti                                                                                                                                           |
| EP1_ISL_757531, EP1_ISL_757542, EP1_ISL_757570, EP1_ISL_757597, EP1_ISL_757616, EP1_ISL_757951, EP1_ISL_758085, EP1_ISL_758086, EP1_ISL_758087, EP1_ISL_758147, EP1_ISL_758155, EP1_ISL_758177, EP1_ISL_758204, EP1_ISL_758246, EP1_ISL_758285, EP1_ISL_758287, EP1_ISL_758301, EP1_ISL_758325, EP1_ISL_758367, EP1_ISL_758389, EP1_ISL_758450, EP1_ISL_758512, EP1_ISL_758534, EP1_ISL_758589, EP1_ISL_758592, EP1_ISL_758594, EP1_ISL_758621, EP1_ISL_758654, EP1_ISL_758965, EP1_ISL_759061, EP1_ISL_759062, EP1_ISL_759107, EP1_ISL_759245, EP1_ISL_759335, EP1_ISL_759420, EP1_ISL_759530, EP1_ISL_759534, EP1_ISL_759688, EP1_ISL_759689                                                                                                                                                                                                                                                                                                                                                                                                                                                                                                                                                                                                                                                                                                                                                                                                                                                                                                                                                                                                                                                                                                                                                                                                                                                                                                                                                                                                                                 | Department of Virology and Microbiology, Special Diagnostics, Statens Serum Institut, Copenhagen, Denmark                              | Aalborg University, Denmark                                                                                                                                                                                                                                                                                  | Danish Covid-19 Genome Consortium                                                                                                                                                                                                                                                                            |
| EP1_ISL_759719, EP1_ISL_759722                                                                                                                                                                                                                                                                                                                                                                                                                                                                                                                                                                                                                                                                                                                                                                                                                                                                                                                                                                                                                                                                                                                                                                                                                                                                                                                                                                                                                                                                                                                                                                                                                                                                                                                                                                                                                                                                                                                                                                                                                                                 | Instituto Nacional de Saude (INSA)                                                                                                     | Instituto Nacional de Saude (INSA)                                                                                                                                                                                                                                                                           | Borges et al                                                                                                                                                                                                                                                                                                 |
| EP1_ISL_759893                                                                                                                                                                                                                                                                                                                                                                                                                                                                                                                                                                                                                                                                                                                                                                                                                                                                                                                                                                                                                                                                                                                                                                                                                                                                                                                                                                                                                                                                                                                                                                                                                                                                                                                                                                                                                                                                                                                                                                                                                                                                 | Temporary Specimen Collection Centre                                                                                                   | Hong Kong Department of Health                                                                                                                                                                                                                                                                               | Alan K.L. Tsang, Peter C.W. Yip, Eiman T.K. Lam, Rickjason C.W. Chan, Dominic N. C. Tsang                                                                                                                                                                                                                    |
| EP1_ISL_759981                                                                                                                                                                                                                                                                                                                                                                                                                                                                                                                                                                                                                                                                                                                                                                                                                                                                                                                                                                                                                                                                                                                                                                                                                                                                                                                                                                                                                                                                                                                                                                                                                                                                                                                                                                                                                                                                                                                                                                                                                                                                 | Norwegian Institute of Public Health, Department of Virology                                                                           | Norwegian Institute of Public Health                                                                                                                                                                                                                                                                         | Kathrine Steine-Johansen, Kamilla Heddeland Insetelford, Hilde Eishaug, Marie Paulsen Madsen, Rasmus Riis Kopperud, Hilde Volian, Karoline Bragstad, Olav Hungnes                                                                                                                                            |
| EP1_ISL_759988                                                                                                                                                                                                                                                                                                                                                                                                                                                                                                                                                                                                                                                                                                                                                                                                                                                                                                                                                                                                                                                                                                                                                                                                                                                                                                                                                                                                                                                                                                                                                                                                                                                                                                                                                                                                                                                                                                                                                                                                                                                                 | Dept. of Medical Microbiology, Stæranger University Hospital, Helse Stæranger HF                                                       | Norwegian Institute of Public Health, Department of Virology                                                                                                                                                                                                                                                 | Kathrine Steine-Johansen, Kamilla Heddeland Insetelford, Hilde Eishaug, Marie Paulsen Madsen, Rasmus Riis Kopperud, Hilde Volian, Karoline Bragstad, Olav Hungnes                                                                                                                                            |
| EP1_ISL_759989                                                                                                                                                                                                                                                                                                                                                                                                                                                                                                                                                                                                                                                                                                                                                                                                                                                                                                                                                                                                                                                                                                                                                                                                                                                                                                                                                                                                                                                                                                                                                                                                                                                                                                                                                                                                                                                                                                                                                                                                                                                                 | Norwegian Institute of Public Health, Department of Virology                                                                           | Norwegian Institute of Public Health, Department of Virology                                                                                                                                                                                                                                                 | Kathrine Steine-Johansen, Kamilla Heddeland Insetelford, Hilde Eishaug, Marie Paulsen Madsen, Rasmus Riis Kopperud, Hilde Volian, Karoline Bragstad, Olav Hungnes                                                                                                                                            |
| EP1_ISL_760115, EP1_ISL_760116, EP1_ISL_760204                                                                                                                                                                                                                                                                                                                                                                                                                                                                                                                                                                                                                                                                                                                                                                                                                                                                                                                                                                                                                                                                                                                                                                                                                                                                                                                                                                                                                                                                                                                                                                                                                                                                                                                                                                                                                                                                                                                                                                                                                                 | Division of Emerging Infectious Diseases, Bureau of Infectious Diseases Diagnosis Control, Korea Disease Control and Prevention Agency | Division of Emerging Infectious Diseases, Bureau of Infectious Diseases Diagnosis Control, Korea Disease Control and Prevention Agency                                                                                                                                                                       | Ae Kyung Park, Il-Hwan Kim, Heui Man Kim, Jeong-Min Kim, Nampoong Lee, Chaeyoung Lee, Sang Hee Woo, Eun-Jin Kim                                                                                                                                                                                              |
| EP1_ISL_760255                                                                                                                                                                                                                                                                                                                                                                                                                                                                                                                                                                                                                                                                                                                                                                                                                                                                                                                                                                                                                                                                                                                                                                                                                                                                                                                                                                                                                                                                                                                                                                                                                                                                                                                                                                                                                                                                                                                                                                                                                                                                 | Lighthouse Lab in Glasgow                                                                                                              | Wellcome Sanger Institute for the COVID-19 Genomics UK (COG-UK) Consortium                                                                                                                                                                                                                                   | Harper VanSteenhouse, Yurni Kasai, David Gray, Carol Clugston, Anna Dominiczak and Alex Alderton, Roberto Amato, Sonia Goncalves, Ewan Harrison, David K. Jackson, Ian Johnston, Dominic Kwiatkowski, Cordelia Langford, John Sillitoe on behalf of the Wellcome Sanger Institute COVID-19 Surveillance Team |
| EP1_ISL_760261                                                                                                                                                                                                                                                                                                                                                                                                                                                                                                                                                                                                                                                                                                                                                                                                                                                                                                                                                                                                                                                                                                                                                                                                                                                                                                                                                                                                                                                                                                                                                                                                                                                                                                                                                                                                                                                                                                                                                                                                                                                                 | Lighthouse Lab in Alderley Park                                                                                                        | Wellcome Sanger Institute for the COVID-19 Genomics UK (COG-UK) Consortium                                                                                                                                                                                                                                   | Jacquelyn Wynn, Mairead Hyland, The Lighthouse Lab in Alderley Park and Alex Alderton, Roberto Amato, Sonia Goncalves, Ewan Harrison, David K. Jackson, Ian Johnston, Dominic Kwiatkowski, Cordelia Langford, John Sillitoe on behalf of the Wellcome Sanger Institute COVID-19 Surveillance Team            |
| EP1_ISL_760282, EP1_ISL_760285                                                                                                                                                                                                                                                                                                                                                                                                                                                                                                                                                                                                                                                                                                                                                                                                                                                                                                                                                                                                                                                                                                                                                                                                                                                                                                                                                                                                                                                                                                                                                                                                                                                                                                                                                                                                                                                                                                                                                                                                                                                 | Lighthouse Lab in Glasgow                                                                                                              | Wellcome Sanger Institute for the COVID-19 Genomics UK (COG-UK) Consortium                                                                                                                                                                                                                                   | Harper VanSteenhouse, Yurni Kasai, David Gray, Carol Clugston, Anna Dominiczak and Alex Alderton, Roberto Amato, Sonia Goncalves, Ewan Harrison, David K. Jackson, Ian Johnston, Dominic Kwiatkowski, Cordelia Langford, John Sillitoe on behalf of the Wellcome Sanger Institute COVID-19 Surveillance Team |
| EP1_ISL_760286, EP1_ISL_760288                                                                                                                                                                                                                                                                                                                                                                                                                                                                                                                                                                                                                                                                                                                                                                                                                                                                                                                                                                                                                                                                                                                                                                                                                                                                                                                                                                                                                                                                                                                                                                                                                                                                                                                                                                                                                                                                                                                                                                                                                                                 | Lighthouse Lab in Alderley Park                                                                                                        | Wellcome Sanger Institute for the COVID-19 Genomics UK (COG-UK) Consortium                                                                                                                                                                                                                                   | Jacquelyn Wynn, Mairead Hyland, The Lighthouse Lab in Alderley Park and Alex Alderton, Roberto Amato, Sonia Goncalves, Ewan Harrison, David K. Jackson, Ian Johnston, Dominic Kwiatkowski, Cordelia Langford, John Sillitoe on behalf of the Wellcome Sanger Institute COVID-19 Surveillance Team            |
| EP1_ISL_760289, EP1_ISL_760270, EP1_ISL_760272, EP1_ISL_760273, EP1_ISL_760283                                                                                                                                                                                                                                                                                                                                                                                                                                                                                                                                                                                                                                                                                                                                                                                                                                                                                                                                                                                                                                                                                                                                                                                                                                                                                                                                                                                                                                                                                                                                                                                                                                                                                                                                                                                                                                                                                                                                                                                                 | Lighthouse Lab in Glasgow                                                                                                              | Wellcome Sanger Institute for the COVID-19 Genomics UK (COG-UK) Consortium                                                                                                                                                                                                                                   | Harper VanSteenhouse, Yurni Kasai, David Gray, Carol Clugston, Anna Dominiczak and Alex Alderton, Roberto Amato, Sonia Goncalves, Ewan Harrison, David K. Jackson, Ian Johnston, Dominic Kwiatkowski, Cordelia Langford, John Sillitoe on behalf of the Wellcome Sanger Institute COVID-19 Surveillance Team |
| EP1_ISL_760284                                                                                                                                                                                                                                                                                                                                                                                                                                                                                                                                                                                                                                                                                                                                                                                                                                                                                                                                                                                                                                                                                                                                                                                                                                                                                                                                                                                                                                                                                                                                                                                                                                                                                                                                                                                                                                                                                                                                                                                                                                                                 | Lighthouse Lab in Alderley Park                                                                                                        | Wellcome Sanger Institute for the COVID-19 Genomics UK (COG-UK) Consortium                                                                                                                                                                                                                                   | Jacquelyn Wynn, Mairead Hyland, The Lighthouse Lab in Alderley Park and Alex Alderton, Roberto Amato, Sonia Goncalves, Ewan Harrison, David K.                                                                                                                                                               |

















|                                                                                                                                                                                                                                                                                                                                                                                                                                                                                                                                                                           |                                                                                                                                                                                                 |                                                                                                                                                                                                                                                                     |                                                                                                                                                                                                                                                                                                                                                                                                                                                      |
|---------------------------------------------------------------------------------------------------------------------------------------------------------------------------------------------------------------------------------------------------------------------------------------------------------------------------------------------------------------------------------------------------------------------------------------------------------------------------------------------------------------------------------------------------------------------------|-------------------------------------------------------------------------------------------------------------------------------------------------------------------------------------------------|---------------------------------------------------------------------------------------------------------------------------------------------------------------------------------------------------------------------------------------------------------------------|------------------------------------------------------------------------------------------------------------------------------------------------------------------------------------------------------------------------------------------------------------------------------------------------------------------------------------------------------------------------------------------------------------------------------------------------------|
| EPI_SL_762984                                                                                                                                                                                                                                                                                                                                                                                                                                                                                                                                                             | Lighthouse Lab in Glasgow                                                                                                                                                                       | Wellcome Sanger Institute for the COVID-19 Genomics UK (COG-UK) Consortium                                                                                                                                                                                          | Harper VanSteenhouse, Yumi Kasai, David Gray, Caro Cullagston, Anna Dominiczak and Alex Alderton, Roberto Arata, Sonia Goncalves, Ewan Harrison, David K. Jackson, Ian Johnston, Dominic Kwiatkowski, Cordelia Langford, John Similec on behalf of the Wellcome Sanger Institute COVID-19 Surveillance Team                                                                                                                                          |
| EPI_SL_763005, EPI_SL_763009, EPI_SL_763044, EPI_SL_763054                                                                                                                                                                                                                                                                                                                                                                                                                                                                                                                | Unit 17, Influenza & Other Respiratory Viruses, German National Influenza Center                                                                                                                | Project group Epidemiology of Highly Pathogenic Microorganisms, Robert Koch-Institute                                                                                                                                                                               | Ariane Dux, Andreas Sachse, Grit Schubert, Sebastian Calygnac-Spencer, Fabian Leenderitz, Thorsten Wolff, Ralf Durwald, Dilin-Ye Oh, Marilene Wedde                                                                                                                                                                                                                                                                                                  |
| EPI_SL_763100, EPI_SL_763101, EPI_SL_763102, EPI_SL_763103, EPI_SL_763110, EPI_SL_763111, EPI_SL_763112, EPI_SL_763114, EPI_SL_763115, EPI_SL_763116, EPI_SL_763117, EPI_SL_763118, EPI_SL_763119, EPI_SL_763120, EPI_SL_763121, EPI_SL_763122, EPI_SL_763130, EPI_SL_763149, EPI_SL_763155, EPI_SL_763172, EPI_SL_763202, EPI_SL_763209, EPI_SL_763214, EPI_SL_763220, EPI_SL_763224, EPI_SL_763229, EPI_SL_763230, EPI_SL_763234, EPI_SL_763235, EPI_SL_763236, EPI_SL_763287, EPI_SL_763289, EPI_SL_763290, EPI_SL_763291, EPI_SL_763297, EPI_SL_763310, EPI_SL_763313 | Dutch COVID-19 response team                                                                                                                                                                    | Bas Oude Munnink, Reina Sikkema, David Nieuwenhuijse, Iina Chastakova, Anne van der Linden, Marjan Boter, Emmanuel Munger, Corine GeurtsvanKessel, Annetiek van der Eljk, Richard Meekamp, Marion Koopmans, on behalf of the Dutch national COVID-19 response team. |                                                                                                                                                                                                                                                                                                                                                                                                                                                      |
| EPI_SL_763329, EPI_SL_763330                                                                                                                                                                                                                                                                                                                                                                                                                                                                                                                                              | Istituto Zooprofilattico Sperimentale dell' Umbria e delle Marche -Togo Rosati                                                                                                                  | Erasmus Medical Center                                                                                                                                                                                                                                              | Massimo Blagetti, Monica Giammarfiori, Luca De Sabato, Gabriele Vaccati, Ilaria Di Bartolo, Giovanni Ianni                                                                                                                                                                                                                                                                                                                                           |
| EPI_SL_763367                                                                                                                                                                                                                                                                                                                                                                                                                                                                                                                                                             | Regional Virus Laboratory, Belfast Health and Social Care Trust                                                                                                                                 | COVID-19 Genomics UK (COG-UK) Consortium                                                                                                                                                                                                                            | Conall McCaughy, James McKenna, Tanya Curran, Susan Feeney, Alison Watt, Ciara Cox, Mairead Connor, Zolian Mohar, David Simpson, Derek Fallley                                                                                                                                                                                                                                                                                                       |
| EPI_SL_763369                                                                                                                                                                                                                                                                                                                                                                                                                                                                                                                                                             | Virology Department, Sheffield Teaching Hospitals NHS Foundation Trust/Department of Infection, Immunity and Cardiovascular Disease, The Medical School, University of Sheffield                | COVID-19 Genomics UK (COG-UK) Consortium                                                                                                                                                                                                                            | Thushan de Silva, Matthew Parker, Nikki Smith, Adri Anyal, Rebecca Brown, Luke Green, Rachel Tucker, Paul Parsons, Danielle Groves, Katie Johnson, Laura Carriero, Alex Keesley, Dave Partridge, Matthew Wyles, Benjamin Lindsey, Mehmet Yavuz, Mohammad Raza, Canad Evans                                                                                                                                                                           |
| EPI_SL_763372                                                                                                                                                                                                                                                                                                                                                                                                                                                                                                                                                             | Quadram Institute Bioscience                                                                                                                                                                    | COVID-19 Genomics UK (COG-UK) Consortium                                                                                                                                                                                                                            | Dave J Baker, Gemma L Kay, Alp Aydin, Thanh Le-Viet, Steven Rudder, Ara P. Tedim, Anastasia Kolyva, Maria Diaz, Leonardo de Oliveira Martins, Nabil-Fareed Alkhran, Lizzie Meadows, Rachael Stanley, Ngozi Eurunjo, Muhammad Yasir, Nicholas M. Thomson, Alexander J Trotter, Rachel Gilroy, Samuel Bloomfield, Claire Stuart, Andrew Bell, Reenesh Prakash, Samir Devsevic, Alison E. Maher, John Wain, Mark Webber, Andrew J. Page, Justin O'Grady |
| EPI_SL_763373                                                                                                                                                                                                                                                                                                                                                                                                                                                                                                                                                             | Regional Virus Laboratory, Belfast Health and Social Care Trust                                                                                                                                 | COVID-19 Genomics UK (COG-UK) Consortium                                                                                                                                                                                                                            | Conall McCaughy, James McKenna, Tanya Curran, Susan Feeney, Alison Watt, Ciara Cox, Mairead Connor, Zolian Mohar, David Simpson, Derek Fallley                                                                                                                                                                                                                                                                                                       |
| EPI_SL_763377                                                                                                                                                                                                                                                                                                                                                                                                                                                                                                                                                             | University College London, Great Ormond Street Hospital for Children NHS Foundation Trust, Imperial College Healthcare NHS Trust                                                                | COVID-19 Genomics UK (COG-UK) Consortium                                                                                                                                                                                                                            | Sergi Castellejano, Rachel Williams, Mark Kristensen, Paola Resende Silva, Surando Roy, Tony Brooks, Helena Tulli, Paola Nola, Patricia Dyal, Charlotte Williams, Leyla Forrest, Yasmin Parochbaya, Jacqueline Findlay, Samuel Weeks, Julianne Brown, Kathryn Harris, Paul Handzel, James Price, Alison Holmes, Judith Breuer                                                                                                                        |
| EPI_SL_763379                                                                                                                                                                                                                                                                                                                                                                                                                                                                                                                                                             | Department of Pathology, University of Cambridge                                                                                                                                                | COVID-19 Genomics UK (COG-UK) Consortium                                                                                                                                                                                                                            | Aminu S. Jatum, Yasmin Chaudhry, Grant Hall, Iliana Georgiana, Myra Hosnilo, Martin D. Curran, Malte Frickert, Surendra Pamar, Ian Goodfellow                                                                                                                                                                                                                                                                                                        |
| EPI_SL_763384, EPI_SL_763390                                                                                                                                                                                                                                                                                                                                                                                                                                                                                                                                              | University of Exeter                                                                                                                                                                            | COVID-19 Genomics UK (COG-UK) Consortium                                                                                                                                                                                                                            | Ben Temperton, Aaron Jeffries, Michelle Michelsen, Joanna Warwick-Dugdale, Audrey Febos, Robyn Manley, Stephen Mitchell, Jane Masoli                                                                                                                                                                                                                                                                                                                 |
| EPI_SL_763386, EPI_SL_763407                                                                                                                                                                                                                                                                                                                                                                                                                                                                                                                                              | Centre for Enzyme Innovation, University of Portsmouth / Translational Research Laboratory, Portsmouth Hospitals NHS Trust                                                                      | COVID-19 Genomics UK (COG-UK) Consortium                                                                                                                                                                                                                            | Angela Beckett, Yann Bourgeois, Garry Scarratt, Sharon Glaysner, Scott Elliott, Kelly Bicknell, Robert Impy, Alysson Loyd, Sarah Wylie, Ethan Butcher, Anoop Chauhan, Samuel Robson                                                                                                                                                                                                                                                                  |
| EPI_SL_763410, EPI_SL_763411                                                                                                                                                                                                                                                                                                                                                                                                                                                                                                                                              | Wales Specialist Virology Centre Sequencing lab: Pathogen Genomics Unit                                                                                                                         | COVID-19 Genomics UK (COG-UK) Consortium                                                                                                                                                                                                                            | Catherine Moore, Johnathan Evans, Laura Gifford, Malorie Perry, Simon Cottrell, Kelly Bicknell, Robert Impy, Alysson Loyd, Sarah Wylie, Ethan Butcher, Anoop Chauhan, Samuel Robson                                                                                                                                                                                                                                                                  |
| EPI_SL_763417                                                                                                                                                                                                                                                                                                                                                                                                                                                                                                                                                             | Regional Virus Laboratory, Belfast Health and Social Care Trust                                                                                                                                 | COVID-19 Genomics UK (COG-UK) Consortium                                                                                                                                                                                                                            | Aminu S. Jatum, Yasmin Chaudhry, Grant Hall, Iliana Georgiana, Myra Hosnilo, Martin D. Curran, Malte Frickert, Surendra Pamar, Ian Goodfellow                                                                                                                                                                                                                                                                                                        |
| EPI_SL_763426                                                                                                                                                                                                                                                                                                                                                                                                                                                                                                                                                             | Department of Pathology, University of Cambridge                                                                                                                                                | COVID-19 Genomics UK (COG-UK) Consortium                                                                                                                                                                                                                            | Thushan de Silva, Matthew Parker, Nikki Smith, Adri Anyal, Rebecca Brown, Luke Green, Rachel Tucker, Paul Parsons, Danielle Groves, Katie Johnson, Laura Carriero, Alex Keesley, Dave Partridge, Matthew Wyles, Benjamin Lindsey, Mehmet Yavuz, Mohammad Raza, Canad Evans                                                                                                                                                                           |
| EPI_SL_763427, EPI_SL_763429                                                                                                                                                                                                                                                                                                                                                                                                                                                                                                                                              | Virology Department, Sheffield Teaching Hospitals NHS Foundation Trust/Department of Infection, Immunity and Cardiovascular Disease, The Medical School, University of Sheffield                | COVID-19 Genomics UK (COG-UK) Consortium                                                                                                                                                                                                                            | Angela Beckett, Yann Bourgeois, Garry Scarratt, Sharon Glaysner, Scott Elliott, Kelly Bicknell, Robert Impy, Alysson Loyd, Sarah Wylie, Ethan Butcher, Anoop Chauhan, Samuel Robson                                                                                                                                                                                                                                                                  |
| EPI_SL_763430                                                                                                                                                                                                                                                                                                                                                                                                                                                                                                                                                             | Centre for Enzyme Innovation, University of Portsmouth / Translational Research Laboratory, Portsmouth Hospitals NHS Trust                                                                      | COVID-19 Genomics UK (COG-UK) Consortium                                                                                                                                                                                                                            | Ben Temperton, Aaron Jeffries, Michelle Michelsen, Joanna Warwick-Dugdale, Audrey Febos, Robyn Manley, Stephen Mitchell, Jane Masoli                                                                                                                                                                                                                                                                                                                 |
| EPI_SL_763431, EPI_SL_763436, EPI_SL_763437, EPI_SL_763439                                                                                                                                                                                                                                                                                                                                                                                                                                                                                                                | University of Exeter                                                                                                                                                                            | COVID-19 Genomics UK (COG-UK) Consortium                                                                                                                                                                                                                            | Thushan de Silva, Matthew Parker, Nikki Smith, Adri Anyal, Rebecca Brown, Luke Green, Rachel Tucker, Paul Parsons, Danielle Groves, Katie Johnson, Laura Carriero, Alex Keesley, Dave Partridge, Matthew Wyles, Benjamin Lindsey, Mehmet Yavuz, Mohammad Raza, Canad Evans                                                                                                                                                                           |
| EPI_SL_763447                                                                                                                                                                                                                                                                                                                                                                                                                                                                                                                                                             | Virology Department, Royal Infirmary of Edinburgh, NHS Lothian / School of Biological Sciences, University of Edinburgh / Institute of Genetics and Molecular Medicine, University of Edinburgh | COVID-19 Genomics UK (COG-UK) Consortium                                                                                                                                                                                                                            | McHugh M. Dewar, R. Rooke S. Gallagher, M. Balcaza C. O'Toole A. Soher E. Hill V. McCrone JT. Colquhoun R. Yu X. Jackson B. Rambaut A. Williams T.C. Templeton K                                                                                                                                                                                                                                                                                     |
| EPI_SL_763448                                                                                                                                                                                                                                                                                                                                                                                                                                                                                                                                                             | Department of Pathology, University of Cambridge                                                                                                                                                | COVID-19 Genomics UK (COG-UK) Consortium                                                                                                                                                                                                                            | Aminu S. Jatum, Yasmin Chaudhry, Grant Hall, Iliana Georgiana, Myra Hosnilo, Martin D. Curran, Malte Frickert, Surendra Pamar, Ian Goodfellow                                                                                                                                                                                                                                                                                                        |
| EPI_SL_763456                                                                                                                                                                                                                                                                                                                                                                                                                                                                                                                                                             | Quadram Institute Bioscience                                                                                                                                                                    | COVID-19 Genomics UK (COG-UK) Consortium                                                                                                                                                                                                                            | Dave J Baker, Gemma L Kay, Alp Aydin, Thanh Le-Viet, Steven Rudder, Ara P. Tedim, Anastasia Kolyva, Maria Diaz, Leonardo de Oliveira Martins, Nabil-Fareed Alkhran, Lizzie Meadows, Rachael Stanley, Ngozi Eurunjo, Muhammad Yasir, Nicholas M. Thomson, Alexander J Trotter, Rachel Gilroy, Samuel Bloomfield, Claire Stuart, Andrew Bell, Reenesh Prakash, Samir Devsevic, Alison E. Maher, John Wain, Mark Webber, Andrew J. Page, Justin O'Grady |
| EPI_SL_763460                                                                                                                                                                                                                                                                                                                                                                                                                                                                                                                                                             | University of Exeter                                                                                                                                                                            | COVID-19 Genomics UK (COG-UK) Consortium                                                                                                                                                                                                                            | Ben Temperton, Aaron Jeffries, Michelle Michelsen, Joanna Warwick-Dugdale, Audrey Febos, Robyn Manley, Stephen Mitchell, Jane Masoli                                                                                                                                                                                                                                                                                                                 |
| EPI_SL_763463                                                                                                                                                                                                                                                                                                                                                                                                                                                                                                                                                             | Regional Virus Laboratory, Belfast Health and Social Care Trust                                                                                                                                 | COVID-19 Genomics UK (COG-UK) Consortium                                                                                                                                                                                                                            | Conall McCaughy, James McKenna, Tanya Curran, Susan Feeney, Alison Watt, Ciara Cox, Mairead Connor, Zolian Mohar, David Simpson, Derek Fallley                                                                                                                                                                                                                                                                                                       |
| EPI_SL_763483                                                                                                                                                                                                                                                                                                                                                                                                                                                                                                                                                             | Quadram Institute Bioscience                                                                                                                                                                    | COVID-19 Genomics UK (COG-UK) Consortium                                                                                                                                                                                                                            | Catherine Moore, Johnathan Evans, Laura Gifford, Malorie Perry, Simon Cottrell, Angela Marchbank, Alec Birchley, Alexander Adams, Amy Gaslin, Bree Gatica-Wilcox, Jason Coombes, Joel Southgate, Lauren Gilbert, Lee Graham, Nicole Panchiani, Sara Kunzries-Summerhayes, Sarah Taylor, Sophie Jones, Sara Ray, Matthew Bull, Joanne Watkins, Sally Corden, Tom Connor                                                                               |
|                                                                                                                                                                                                                                                                                                                                                                                                                                                                                                                                                                           | Wales Specialist Virology Centre Sequencing lab: Pathogen Genomics Unit                                                                                                                         | COVID-19 Genomics UK (COG-UK) Consortium                                                                                                                                                                                                                            | Dave J Baker, Gemma L Kay, Alp Aydin, Thanh Le-Viet, Steven Rudder, Ara P. Tedim, Anastasia Kolyva, Maria Diaz, Leonardo de Oliveira Martins, Nabil-Fareed Alkhran, Lizzie Meadows, Rachael Stanley, Ngozi Eurunjo, Muhammad Yasir, Nicholas M. Thomson, Alexander J Trotter, Rachel Gilroy, Samuel Bloomfield, Claire Stuart, Andrew Bell, Reenesh Prakash, Samir Devsevic, Alison E. Maher, John Wain, Mark Webber, Andrew J. Page, Justin O'Grady |

|                                                                                                |                                                                                                                                                                                                 |                                          |                                                                                                                                                                                                                                                                                                                                                                                                                                                           |
|------------------------------------------------------------------------------------------------|-------------------------------------------------------------------------------------------------------------------------------------------------------------------------------------------------|------------------------------------------|-----------------------------------------------------------------------------------------------------------------------------------------------------------------------------------------------------------------------------------------------------------------------------------------------------------------------------------------------------------------------------------------------------------------------------------------------------------|
| EPI_ISL_763484, EPI_ISL_763487, EPI_ISL_763489                                                 | Wales Specialist Virology Centre Sequencing lab: Pathogen Genomics Unit                                                                                                                         | COVID-19 Genomics UK (COG-UK) Consortium | Catherine Moore, Johnathan Evans, Laura Gifford, Malorie Perry, Simon Cottrell, Angela Marchbank, Alec Birchley, Alexander Adams, Amy Gasikin, Bree Gatica-Wilcox, Jason Coombes, Joel Soutigate, Lauren Gilbert, Lee Graham, Nicole Pachatiani, Sara Kunzlene-Summerhayes, Sarah Taylor, Sophie Jones, Sara Rey, Matthew Bull, Joanne Walkins, Sally Corden, Tom Connor                                                                                  |
| EPI_ISL_763490                                                                                 | Quadram Institute Bioscience                                                                                                                                                                    | COVID-19 Genomics UK (COG-UK) Consortium | Dave J. Baker, Gemma L. Key, Alp Aydin, Thanh Le-Viet, Steven Rudder, Ana P. Tedim, Anastasia Kolyva, Maria Diaz, Leonardo de Oliveira Martins, Nabil-Fareed Alkhran, Lizzie Meadows, Rachael Stanely, Nguzi Eurnogo, Muhammed Yasar, Nicholas M. Thomson, Alexander J. Trotter, Rachel Gilroy, Samuel Bloomfield, Claire Stuart, Andrew Bell, Reemesh Prakash, Sami Dervisevic, Alison E. Mather, John Wann, Mark Webber, Andrew J. Page, Justin O'Grady |
| EPI_ISL_763494, EPI_ISL_763497                                                                 | Wales Specialist Virology Centre Sequencing lab: Pathogen Genomics Unit                                                                                                                         | COVID-19 Genomics UK (COG-UK) Consortium | Catherine Moore, Johnathan Evans, Laura Gifford, Malorie Perry, Simon Cottrell, Angela Marchbank, Alec Birchley, Alexander Adams, Amy Gasikin, Bree Gatica-Wilcox, Jason Coombes, Joel Soutigate, Lauren Gilbert, Lee Graham, Nicole Pachatiani, Sara Kunzlene-Summerhayes, Sarah Taylor, Sophie Jones, Sara Rey, Matthew Bull, Joanne Walkins, Sally Corden, Tom Connor                                                                                  |
| EPI_ISL_763502                                                                                 | Quadram Institute Bioscience                                                                                                                                                                    | COVID-19 Genomics UK (COG-UK) Consortium | Dave J. Baker, Gemma L. Key, Alp Aydin, Thanh Le-Viet, Steven Rudder, Ana P. Tedim, Anastasia Kolyva, Maria Diaz, Leonardo de Oliveira Martins, Nabil-Fareed Alkhran, Lizzie Meadows, Rachael Stanely, Nguzi Eurnogo, Muhammed Yasar, Nicholas M. Thomson, Alexander J. Trotter, Rachel Gilroy, Samuel Bloomfield, Claire Stuart, Andrew Bell, Reemesh Prakash, Sami Dervisevic, Alison E. Mather, John Wann, Mark Webber, Andrew J. Page, Justin O'Grady |
| EPI_ISL_763503                                                                                 | Centre for Enzyme Innovation, University of Portsmouth / Translational Research Laboratory, Portsmouth Hospitals NHS Trust                                                                      | COVID-19 Genomics UK (COG-UK) Consortium | Thushan de Silva, Matthew Parker, Nikki Smith, Adri Angyal, Rebecca Brown, Luke Green, Rachel Tucker, Paul Parsons, Danielle Groves, Katie Johnson, Laura Carriero, Alex Keesley, Dave Partridge, Matthew Wykes, Benjamin Lindsey, Mehmet Yavuz, Mohammad Raza, Carad Evans                                                                                                                                                                               |
| EPI_ISL_763506                                                                                 | Virology Department, Sheffield Teaching Hospitals NHS Foundation Trust/Department of Infection, Immunity and Cardiovascular Disease, The Medical School, University of Sheffield                | COVID-19 Genomics UK (COG-UK) Consortium | Angela Beckett, Yann Bougeois Garry Scarlett, Sharon Glaysner, Scott Elliott, Kelly Dicknell, Robert Impey, Allyson Loyd, Sarah Wylie, Ethan Butcher, Anoop Chauhan, Samuel Robson                                                                                                                                                                                                                                                                        |
| EPI_ISL_763517                                                                                 | Centre for Enzyme Innovation, University of Portsmouth / Translational Research Laboratory, Portsmouth Hospitals NHS Trust                                                                      | COVID-19 Genomics UK (COG-UK) Consortium | Angela Beckett, Yann Bougeois Garry Scarlett, Sharon Glaysner, Scott Elliott, Kelly Dicknell, Robert Impey, Allyson Loyd, Sarah Wylie, Ethan Butcher, Anoop Chauhan, Samuel Robson                                                                                                                                                                                                                                                                        |
| EPI_ISL_763525                                                                                 | Wales Specialist Virology Centre Sequencing lab: Pathogen Genomics Unit                                                                                                                         | COVID-19 Genomics UK (COG-UK) Consortium | Catherine Moore, Johnathan Evans, Laura Gifford, Malorie Perry, Simon Cottrell, Angela Marchbank, Alec Birchley, Alexander Adams, Amy Gasikin, Bree Gatica-Wilcox, Jason Coombes, Joel Soutigate, Lauren Gilbert, Lee Graham, Nicole Pachatiani, Sara Kunzlene-Summerhayes, Sarah Taylor, Sophie Jones, Sara Rey, Matthew Bull, Joanne Walkins, Sally Corden, Tom Connor                                                                                  |
| EPI_ISL_763529, EPI_ISL_763535                                                                 | University of Exeter                                                                                                                                                                            | COVID-19 Genomics UK (COG-UK) Consortium | Ben Temperton Aaron, Jeffries, Michelle Michelsen, Joanna Warwick-Dugdale, Audrey Fardos, Robyn Manley, Stephen Mitchell, Jane Masoli                                                                                                                                                                                                                                                                                                                     |
| EPI_ISL_763538                                                                                 | Wales Specialist Virology Centre Sequencing lab: Pathogen Genomics Unit                                                                                                                         | COVID-19 Genomics UK (COG-UK) Consortium | Catherine Moore, Johnathan Evans, Laura Gifford, Malorie Perry, Simon Cottrell, Angela Marchbank, Alec Birchley, Alexander Adams, Amy Gasikin, Bree Gatica-Wilcox, Jason Coombes, Joel Soutigate, Lauren Gilbert, Lee Graham, Nicole Pachatiani, Sara Kunzlene-Summerhayes, Sarah Taylor, Sophie Jones, Sara Rey, Matthew Bull, Joanne Walkins, Sally Corden, Tom Connor                                                                                  |
| EPI_ISL_763543                                                                                 | University of Exeter                                                                                                                                                                            | COVID-19 Genomics UK (COG-UK) Consortium | Ben Temperton Aaron, Jeffries, Michelle Michelsen, Joanna Warwick-Dugdale, Audrey Fardos, Robyn Manley, Stephen Mitchell, Jane Masoli                                                                                                                                                                                                                                                                                                                     |
| EPI_ISL_763548                                                                                 | Virology Department, Royal Infirmary of Edinburgh, NHS Lothian / School of Biological Sciences, University of Edinburgh / Institute of Genetics and Molecular Medicine, University of Edinburgh | COVID-19 Genomics UK (COG-UK) Consortium | McHugh M. Dewar, R. Rooke S., Gallagher M., Balcaza C, O'Toole A., Seher E, Hill V., McCrone JT, Coldhoun R, Yu X, Jackson B, Rambaut A, Williams TC, Templeton K                                                                                                                                                                                                                                                                                         |
| EPI_ISL_763566, EPI_ISL_763568, EPI_ISL_763584, EPI_ISL_763585                                 | Wales Specialist Virology Centre Sequencing lab: Pathogen Genomics Unit                                                                                                                         | COVID-19 Genomics UK (COG-UK) Consortium | Catherine Moore, Johnathan Evans, Laura Gifford, Malorie Perry, Simon Cottrell, Angela Marchbank, Alec Birchley, Alexander Adams, Amy Gasikin, Bree Gatica-Wilcox, Jason Coombes, Joel Soutigate, Lauren Gilbert, Lee Graham, Nicole Pachatiani, Sara Kunzlene-Summerhayes, Sarah Taylor, Sophie Jones, Sara Rey, Matthew Bull, Joanne Walkins, Sally Corden, Tom Connor                                                                                  |
| EPI_ISL_763586                                                                                 | Centre for Enzyme Innovation, University of Portsmouth / Translational Research Laboratory, Portsmouth Hospitals NHS Trust                                                                      | COVID-19 Genomics UK (COG-UK) Consortium | Angela Beckett, Yann Bougeois Garry Scarlett, Sharon Glaysner, Scott Elliott, Kelly Dicknell, Robert Impey, Allyson Loyd, Sarah Wylie, Ethan Butcher, Anoop Chauhan, Samuel Robson                                                                                                                                                                                                                                                                        |
| EPI_ISL_763587                                                                                 | Quadram Institute Bioscience                                                                                                                                                                    | COVID-19 Genomics UK (COG-UK) Consortium | Dave J. Baker, Gemma L. Key, Alp Aydin, Thanh Le-Viet, Steven Rudder, Ana P. Tedim, Anastasia Kolyva, Maria Diaz, Leonardo de Oliveira Martins, Nabil-Fareed Alkhran, Lizzie Meadows, Rachael Stanely, Nguzi Eurnogo, Muhammed Yasar, Nicholas M. Thomson, Alexander J. Trotter, Rachel Gilroy, Samuel Bloomfield, Claire Stuart, Andrew Bell, Reemesh Prakash, Sami Dervisevic, Alison E. Mather, John Wann, Mark Webber, Andrew J. Page, Justin O'Grady |
| EPI_ISL_763588                                                                                 | Virology Department, Sheffield Teaching Hospitals NHS Foundation Trust/Department of Infection, Immunity and Cardiovascular Disease, The Medical School, University of Sheffield                | COVID-19 Genomics UK (COG-UK) Consortium | Thushan de Silva, Matthew Parker, Nikki Smith, Adri Angyal, Rebecca Brown, Luke Green, Rachel Tucker, Paul Parsons, Danielle Groves, Katie Johnson, Laura Carriero, Alex Keesley, Dave Partridge, Matthew Wykes, Benjamin Lindsey, Mehmet Yavuz, Mohammad Raza, Carad Evans                                                                                                                                                                               |
| EPI_ISL_763591                                                                                 | Wales Specialist Virology Centre Sequencing lab: Pathogen Genomics Unit                                                                                                                         | COVID-19 Genomics UK (COG-UK) Consortium | Catherine Moore, Johnathan Evans, Laura Gifford, Malorie Perry, Simon Cottrell, Angela Marchbank, Alec Birchley, Alexander Adams, Amy Gasikin, Bree Gatica-Wilcox, Jason Coombes, Joel Soutigate, Lauren Gilbert, Lee Graham, Nicole Pachatiani, Sara Kunzlene-Summerhayes, Sarah Taylor, Sophie Jones, Sara Rey, Matthew Bull, Joanne Walkins, Sally Corden, Tom Connor                                                                                  |
| EPI_ISL_763600, EPI_ISL_763603, EPI_ISL_763620, EPI_ISL_763621, EPI_ISL_763622, EPI_ISL_763624 | Centre for Enzyme Innovation, University of Portsmouth / Translational Research Laboratory, Portsmouth Hospitals NHS Trust                                                                      | COVID-19 Genomics UK (COG-UK) Consortium | Angela Beckett, Yann Bougeois Garry Scarlett, Sharon Glaysner, Scott Elliott, Kelly Dicknell, Robert Impey, Allyson Loyd, Sarah Wylie, Ethan Butcher, Anoop Chauhan, Samuel Robson                                                                                                                                                                                                                                                                        |
| EPI_ISL_763628                                                                                 | University College London, Great Ormond Street Hospital for Children NHS Foundation Trust, Imperial College Healthcare NHS Trust                                                                | COVID-19 Genomics UK (COG-UK) Consortium | Sergi Castellano, Rachel Williams, Mark Kristiansen, Paola Resende Silva, Surando Roy, Tony Brooks, Helena Tullil, Paola Nicola, Patricia Dyal, Charlotte Williams, Leylas Forrest, Yasmin Panchbhaya, Jacqueline Findlay, Samuel Weeks, Juliana Brown, Kathryn Harris, Paul Fandell, James Price, Alison Holmes, Judith Breuer                                                                                                                           |
| EPI_ISL_763630                                                                                 | University of Exeter                                                                                                                                                                            | COVID-19 Genomics UK (COG-UK) Consortium | Ben Temperton, Aaron, Jeffries, Michelle Michelsen, Joanna Warwick-Dugdale, Audrey Fardos, Robyn Manley, Stephen Mitchell, Jane Masoli                                                                                                                                                                                                                                                                                                                    |
| EPI_ISL_763634, EPI_ISL_763635, EPI_ISL_763636                                                 | Virology Department, Sheffield Teaching Hospitals NHS Foundation Trust/Department of Infection, Immunity and Cardiovascular Disease, The Medical School, University of Sheffield                | COVID-19 Genomics UK (COG-UK) Consortium | Thushan de Silva, Matthew Parker, Nikki Smith, Adri Angyal, Rebecca Brown, Luke Green, Rachel Tucker, Paul Parsons, Danielle Groves, Katie Johnson, Laura Carriero, Alex Keesley, Dave Partridge, Matthew Wykes, Benjamin Lindsey, Mehmet Yavuz, Mohammad Raza, Carad Evans                                                                                                                                                                               |
| EPI_ISL_763637                                                                                 | Department of Pathology, University of Cambridge                                                                                                                                                | COVID-19 Genomics UK (COG-UK) Consortium | Aminu S. Jatum, Yasmin Chaudhry, Grant Hall, Ilana Georgana, Myra Hosmillo, Martin D. Curran, Malie Brickett, Surendra Parmar, Ian Goodfellow                                                                                                                                                                                                                                                                                                             |
| EPI_ISL_763639                                                                                 | Virology Department, Sheffield Teaching Hospitals NHS Foundation Trust/Department of Infection, Immunity and Cardiovascular Disease, The Medical School, University of Sheffield                | COVID-19 Genomics UK (COG-UK) Consortium | Thushan de Silva, Matthew Parker, Nikki Smith, Adri Angyal, Rebecca Brown, Luke Green, Rachel Tucker, Paul Parsons, Danielle Groves, Katie Johnson, Laura Carriero, Alex Keesley, Dave Partridge, Matthew Wykes, Benjamin Lindsey, Mehmet Yavuz, Mohammad Raza, Carad Evans                                                                                                                                                                               |
| EPI_ISL_763642                                                                                 | Regional Virus Laboratory, Belfast Health and Social Care Trust                                                                                                                                 | COVID-19 Genomics UK (COG-UK) Consortium | Conall McCaughey, James McKenna, Tanya Curran, Susan Feeley, Alison Watt, Ciara Cox, Mairead Connor, Zoltan Molnar, David Simpson, Derek Fallley                                                                                                                                                                                                                                                                                                          |
| EPI_ISL_763646, EPI_ISL_763651, EPI_ISL_763654                                                 | Virology Department, Sheffield Teaching Hospitals NHS Foundation Trust/Department of Infection, Immunity and Cardiovascular Disease, The Medical School, University of                          | COVID-19 Genomics UK (COG-UK) Consortium | Thushan de Silva, Matthew Parker, Nikki Smith, Adri Angyal, Rebecca Brown, Luke Green, Rachel Tucker, Paul Parsons, Danielle Groves, Katie Johnson, Laura Carriero, Alex Keesley, Dave Partridge, Matthew Wykes, Benjamin Lindsey, Mehmet Yavuz, Mohammad Raza, Carad Evans                                                                                                                                                                               |

|                                                                                                                                                                |                                                                                                                                                                                                  |                                                                                                                                                                                                  |                                          |                                                                                                                                                                                                                                                                                                                                                                                                                                                         |
|----------------------------------------------------------------------------------------------------------------------------------------------------------------|--------------------------------------------------------------------------------------------------------------------------------------------------------------------------------------------------|--------------------------------------------------------------------------------------------------------------------------------------------------------------------------------------------------|------------------------------------------|---------------------------------------------------------------------------------------------------------------------------------------------------------------------------------------------------------------------------------------------------------------------------------------------------------------------------------------------------------------------------------------------------------------------------------------------------------|
| EP1_ISL_763662                                                                                                                                                 | Sheffield                                                                                                                                                                                        | Quadrant Institute Bioscience                                                                                                                                                                    | COVID-19 Genomics UK (COG-UK) Consortium | Dave J Baker, Gemma L Kay, Alp Aydin, Thanh Le-Viet, Steven Rudder, Ara P. Tedim, Anastasia Kolyva, Maria Diaz, Leonardo de Oliveira Martins, Nabil-Fareed Alkhran, Lizzie Meadows, Rachel Stanely, Ngozi Elnunogo, Muhammed Yasir, Nicholas M. Thomson, Alexander J Trotter, Rachel Gilroy, Samuel Bloomfield, Claire Stuart, Andrew Bell, Reemesh Prakash, Sami Dervisevic, Alison E. Mahner, John Wain, Mark Webber, Andrew J. Page, Justin O'Grady  |
| EP1_ISL_763666                                                                                                                                                 | Department of Pathology, University of Cambridge                                                                                                                                                 | Queens Medical Centre, Clinical Microbiology Department / DeepSeq Nottingham                                                                                                                     | COVID-19 Genomics UK (COG-UK) Consortium | Gemma Clark, Wendy Smith, Manjinder Khakh, Vicki M Fleming, Michéle M Lister, Hannah Howson-Wellis, Jonathan Ball, Patrick McCuire, Joseph Chappell, Theodoras Tsoleridis, Nadine Holmes, Matthew Carlisle, Christopher Moore, Fel Sang, Johnny Debebe, Victoria Wright, Matthew Loose                                                                                                                                                                  |
| EP1_ISL_763677                                                                                                                                                 | Viriology Department, Sheffield Teaching Hospitals NHS Foundation Trust, Department of Infection, Immunity and Cardiovascular Disease, The Medical School, University of Sheffield               | Viriology Department, Sheffield Teaching Hospitals NHS Foundation Trust, Department of Infection, Immunity and Cardiovascular Disease, The Medical School, University of Sheffield               | COVID-19 Genomics UK (COG-UK) Consortium | Thushan de Silva, Matthew Parker, Nikki Smith, Adri Angyal, Rebecca Brown, Luke Green, Rachel Tucker, Paul Parsons, Danielle Groves, Katie Johnson, Laura Carrilero, Alex Keeley, Dave Partridge, Matthew Wyles, Benjamin Lindsey, Mehmet Yavuz, Mohammad Raza, Carad Evans                                                                                                                                                                             |
| EP1_ISL_763679                                                                                                                                                 | Wales Specialist Viriology Centre Sequencing lab: Pathogen Genomics Unit                                                                                                                         | Wales Specialist Viriology Centre Sequencing lab: Pathogen Genomics Unit                                                                                                                         | COVID-19 Genomics UK (COG-UK) Consortium | Catherine Moore, Johnathan Evans, Laura Gifford, Malorie Perry, Simon Cottrell, Angela Marchbank, Alec Birchley, Alexander Adams, Amy Gaskin, Bree Gatica-Wilcox, Jason Coombes, Joel Southgate, Lauren Gilbert, Lee Graham, Nicole Paochianini, Sara Kunzlene-Summerhayes, Sarah Taylor, Sophie Jones, Sara Rey, Matthew Bull, Joanne Walkins, Sally Corden, Tom Connor                                                                                |
| EP1_ISL_763683                                                                                                                                                 | Quadrant Institute Bioscience                                                                                                                                                                    | Quadrant Institute Bioscience                                                                                                                                                                    | COVID-19 Genomics UK (COG-UK) Consortium | Dave J Baker, Gemma L Kay, Alp Aydin, Thanh Le-Viet, Steven Rudder, Ara P. Tedim, Anastasia Kolyva, Maria Diaz, Leonardo de Oliveira Martins, Nabil-Fareed Alkhran, Lizzie Meadows, Rachel Stanely, Nigozi Elnunogo, Muhammed Yasir, Nicholas M. Thomson, Alexander J Trotter, Rachel Gilroy, Samuel Bloomfield, Claire Stuart, Andrew Bell, Reemesh Prakash, Sami Dervisevic, Alison E. Mahner, John Wain, Mark Webber, Andrew J. Page, Justin O'Grady |
| EP1_ISL_763686                                                                                                                                                 | Wales Specialist Viriology Centre Sequencing lab: Pathogen Genomics Unit                                                                                                                         | Wales Specialist Viriology Centre Sequencing lab: Pathogen Genomics Unit                                                                                                                         | COVID-19 Genomics UK (COG-UK) Consortium | Catherine Moore, Johnathan Evans, Laura Gifford, Malorie Perry, Simon Cottrell, Angela Marchbank, Alec Birchley, Alexander Adams, Amy Gaskin, Bree Gatica-Wilcox, Jason Coombes, Joel Southgate, Lauren Gilbert, Lee Graham, Nicole Paochianini, Sara Kunzlene-Summerhayes, Sarah Taylor, Sophie Jones, Sara Rey, Matthew Bull, Joanne Walkins, Sally Corden, Tom Connor                                                                                |
| EP1_ISL_763688                                                                                                                                                 | Department of Pathology, University of Cambridge                                                                                                                                                 | Department of Pathology, University of Cambridge                                                                                                                                                 | COVID-19 Genomics UK (COG-UK) Consortium | Aminu S. Jatum, Yasmin Chaudry, Grant Hall, Ilana Georgiana, Myra Hosnilo, Martin D. Curran, Malte Prickett, Surendra Pamar, Ian Goodfellow                                                                                                                                                                                                                                                                                                             |
| EP1_ISL_763689                                                                                                                                                 | Quadrant Institute Bioscience                                                                                                                                                                    | Quadrant Institute Bioscience                                                                                                                                                                    | COVID-19 Genomics UK (COG-UK) Consortium | Dave J Baker, Gemma L Kay, Alp Aydin, Thanh Le-Viet, Steven Rudder, Ara P. Tedim, Anastasia Kolyva, Maria Diaz, Leonardo de Oliveira Martins, Nabil-Fareed Alkhran, Lizzie Meadows, Rachel Stanely, Nigozi Elnunogo, Muhammed Yasir, Nicholas M. Thomson, Alexander J Trotter, Rachel Gilroy, Samuel Bloomfield, Claire Stuart, Andrew Bell, Reemesh Prakash, Sami Dervisevic, Alison E. Mahner, John Wain, Mark Webber, Andrew J. Page, Justin O'Grady |
| EP1_ISL_763690                                                                                                                                                 | Centre for Enzyme Innovation, University of Portsmouth / Translational Research Laboratory, Portsmouth Hospitals NHS Trust                                                                       | Centre for Enzyme Innovation, University of Portsmouth / Translational Research Laboratory, Portsmouth Hospitals NHS Trust                                                                       | COVID-19 Genomics UK (COG-UK) Consortium | Angela Beckett, Yann Bourgeois, Garry Scarlett, Sharon Glaysher, Scott Elliott, Kelly Becknell, Robert Impry, Alyson Lloyd, Sarah Wylie, Ethan Butcher, Anoop Chauhan, Samuel Hooson                                                                                                                                                                                                                                                                    |
| EP1_ISL_763692                                                                                                                                                 | Wales Specialist Viriology Centre Sequencing lab: Pathogen Genomics Unit                                                                                                                         | Wales Specialist Viriology Centre Sequencing lab: Pathogen Genomics Unit                                                                                                                         | COVID-19 Genomics UK (COG-UK) Consortium | Catherine Moore, Johnathan Evans, Laura Gifford, Malorie Perry, Simon Cottrell, Angela Marchbank, Alec Birchley, Alexander Adams, Amy Gaskin, Bree Gatica-Wilcox, Jason Coombes, Joel Southgate, Lauren Gilbert, Lee Graham, Nicole Paochianini, Sara Kunzlene-Summerhayes, Sarah Taylor, Sophie Jones, Sara Rey, Matthew Bull, Joanne Walkins, Sally Corden, Tom Connor                                                                                |
| EP1_ISL_763696                                                                                                                                                 | Viriology Department, Royal Infirmary of Edinburgh, NHS Lothian / School of Biological Sciences, University of Edinburgh / Institute of Genetics and Molecular Medicine, University of Edinburgh | Viriology Department, Royal Infirmary of Edinburgh, NHS Lothian / School of Biological Sciences, University of Edinburgh / Institute of Genetics and Molecular Medicine, University of Edinburgh | COVID-19 Genomics UK (COG-UK) Consortium | McHugh M, Dewar R, Rooke S, Gallagher M, Balcaza C, O'Toole A, Soper E, Hill V, McCrone JT, Coldhoun R, Yu X, Jackson B, Rampauf A, Williams TC, Templeton K                                                                                                                                                                                                                                                                                            |
| EP1_ISL_763700                                                                                                                                                 | University of Exeter                                                                                                                                                                             | University College London, Great Ormond Street Hospital for Children NHS Foundation Trust, Imperial College Healthcare NHS Trust                                                                 | COVID-19 Genomics UK (COG-UK) Consortium | Bert Temperton, Aaron Jeffries, Michelle Nielsen, Joanna Warwick-Dugdale, Audrey Febos, Robyn Manley, Stephen Michael Jane Masoli                                                                                                                                                                                                                                                                                                                       |
| EP1_ISL_763702                                                                                                                                                 | Department of Pathology, University of Cambridge                                                                                                                                                 | Department of Pathology, University of Cambridge                                                                                                                                                 | COVID-19 Genomics UK (COG-UK) Consortium | Aminu S. Jatum, Yasmin Chaudry, Grant Hall, Ilana Georgiana, Myra Hosnilo, Martin D. Curran, Malte Prickett, Surendra Pamar, Ian Goodfellow                                                                                                                                                                                                                                                                                                             |
| EP1_ISL_763703, EP1_ISL_763705, EP1_ISL_763706, EP1_ISL_763707, EP1_ISL_763710, EP1_ISL_763713                                                                 | Regional Virus Laboratory, Belfast Health and Social Care Trust                                                                                                                                  | Regional Virus Laboratory, Belfast Health and Social Care Trust                                                                                                                                  | COVID-19 Genomics UK (COG-UK) Consortium | Bert Temperton, Aaron Jeffries, Michelle Nielsen, Joanna Warwick-Dugdale, Audrey Febos, Robyn Manley, Stephen Michael Jane Masoli                                                                                                                                                                                                                                                                                                                       |
| EP1_ISL_763727                                                                                                                                                 | Quadrant Institute Bioscience                                                                                                                                                                    | Quadrant Institute Bioscience                                                                                                                                                                    | COVID-19 Genomics UK (COG-UK) Consortium | Cornell McCaughey, James McKenna, Tanya Curran, Susan Feeney, Alison Watt, Ciara Cox, Malvead Connor, Zoltan Mohar, David Simpson, Derek Fairley                                                                                                                                                                                                                                                                                                        |
| EP1_ISL_763745                                                                                                                                                 | University College London, Great Ormond Street Hospital for Children NHS Foundation Trust, Imperial College Healthcare NHS Trust                                                                 | University College London, Great Ormond Street Hospital for Children NHS Foundation Trust, Imperial College Healthcare NHS Trust                                                                 | COVID-19 Genomics UK (COG-UK) Consortium | Dave J Baker, Gemma L Kay, Alp Aydin, Thanh Le-Viet, Steven Rudder, Ara P. Tedim, Anastasia Kolyva, Maria Diaz, Leonardo de Oliveira Martins, Nabil-Fareed Alkhran, Lizzie Meadows, Rachel Stanely, Nigozi Elnunogo, Muhammed Yasir, Nicholas M. Thomson, Alexander J Trotter, Rachel Gilroy, Samuel Bloomfield, Claire Stuart, Andrew Bell, Reemesh Prakash, Sami Dervisevic, Alison E. Mahner, John Wain, Mark Webber, Andrew J. Page, Justin O'Grady |
| EP1_ISL_763746                                                                                                                                                 | Viriology Department, Sheffield Teaching Hospitals NHS Foundation Trust, Department of Infection, Immunity and Cardiovascular Disease, The Medical School, University of Sheffield               | Viriology Department, Sheffield Teaching Hospitals NHS Foundation Trust, Department of Infection, Immunity and Cardiovascular Disease, The Medical School, University of Sheffield               | COVID-19 Genomics UK (COG-UK) Consortium | Catherine Moore, Johnathan Evans, Laura Gifford, Malorie Perry, Simon Cottrell, Angela Marchbank, Alec Birchley, Alexander Adams, Amy Gaskin, Bree Gatica-Wilcox, Jason Coombes, Joel Southgate, Lauren Gilbert, Lee Graham, Nicole Paochianini, Sara Kunzlene-Summerhayes, Sarah Taylor, Sophie Jones, Sara Rey, Matthew Bull, Joanne Walkins, Sally Corden, Tom Connor                                                                                |
| EP1_ISL_763750, EP1_ISL_763758, EP1_ISL_763759, EP1_ISL_763760, EP1_ISL_763762, EP1_ISL_763765, EP1_ISL_763768, EP1_ISL_763770, EP1_ISL_763776, EP1_ISL_763779 | Wales Specialist Viriology Centre Sequencing lab: Pathogen Genomics Unit                                                                                                                         | Wales Specialist Viriology Centre Sequencing lab: Pathogen Genomics Unit                                                                                                                         | COVID-19 Genomics UK (COG-UK) Consortium | Thushan de Silva, Matthew Parker, Nikki Smith, Adri Angyal, Rebecca Brown, Luke Green, Rachel Tucker, Paul Parsons, Danielle Groves, Katie Johnson, Laura Carrilero, Alex Keeley, Dave Partridge, Matthew Wyles, Benjamin Lindsey, Mehmet Yavuz, Mohammad Raza, Carad Evans                                                                                                                                                                             |
| EP1_ISL_763781                                                                                                                                                 | Quadrant Institute Bioscience                                                                                                                                                                    | Quadrant Institute Bioscience                                                                                                                                                                    | COVID-19 Genomics UK (COG-UK) Consortium | Dave J Baker, Gemma L Kay, Alp Aydin, Thanh Le-Viet, Steven Rudder, Ara P. Tedim, Anastasia Kolyva, Maria Diaz, Leonardo de Oliveira Martins, Nabil-Fareed Alkhran, Lizzie Meadows, Rachel Stanely, Nigozi Elnunogo, Muhammed Yasir, Nicholas M. Thomson, Alexander J Trotter, Rachel Gilroy, Samuel Bloomfield, Claire Stuart, Andrew Bell, Reemesh Prakash, Sami Dervisevic, Alison E. Mahner, John Wain, Mark Webber, Andrew J. Page, Justin O'Grady |
| EP1_ISL_763784                                                                                                                                                 | University College London, Great Ormond Street Hospital for Children NHS Foundation Trust, Imperial College Healthcare NHS Trust                                                                 | University College London, Great Ormond Street Hospital for Children NHS Foundation Trust, Imperial College Healthcare NHS Trust                                                                 | COVID-19 Genomics UK (COG-UK) Consortium | Sergi Castellano, Rachel Williams, Mark Kristiansen, Paola Resende Silva, Surando Roy, Tony Brooks, Helena Tullil, Paola Niola, Patricia Dyal, Charlotte Williams, Leyla Forrest, Yasmin Panchbhaya, Jacqueline Findlay, Samuel Weeks, Julianne Brown, Kathryn Harris, Paul Randell, James Price, Alison Holmes, Judith Breuer                                                                                                                          |
| EP1_ISL_763786, EP1_ISL_763787, EP1_ISL_763788                                                                                                                 | Wales Specialist Viriology Centre Sequencing lab: Pathogen Genomics Unit                                                                                                                         | Wales Specialist Viriology Centre Sequencing lab: Pathogen Genomics Unit                                                                                                                         | COVID-19 Genomics UK (COG-UK) Consortium | Catherine Moore, Johnathan Evans, Laura Gifford, Malorie Perry, Simon Cottrell, Angela Marchbank, Alec Birchley, Alexander Adams, Amy Gaskin, Bree Gatica-Wilcox, Jason Coombes, Joel Southgate, Lauren Gilbert, Lee Graham, Nicole Paochianini, Sara Kunzlene-Summerhayes, Sarah Taylor, Sophie Jones, Sara Rey, Matthew Bull, Joanne Walkins, Sally Corden, Tom Connor                                                                                |

|                                                |                                                                                                                                                                                                 |                                          |                                                                                                                                                                                                                                                                                                                                                                                                                                                               |
|------------------------------------------------|-------------------------------------------------------------------------------------------------------------------------------------------------------------------------------------------------|------------------------------------------|---------------------------------------------------------------------------------------------------------------------------------------------------------------------------------------------------------------------------------------------------------------------------------------------------------------------------------------------------------------------------------------------------------------------------------------------------------------|
| EPI_ISL_763789                                 | Centre for Enzyme Innovation, University of Portsmouth / Translational Research Laboratory, Portsmouth Hospitals NHS Trust                                                                      | COVID-19 Genomics UK (COG-UK) Consortium | Jones, Sara Rey, Matthew Bull, Joanne Watkins, Sally Corden, Tom Connor                                                                                                                                                                                                                                                                                                                                                                                       |
| EPI_ISL_763794, EPI_ISL_763796, EPI_ISL_763816 | Department of Pathology, University of Cambridge                                                                                                                                                | COVID-19 Genomics UK (COG-UK) Consortium | Aminu S. Jalun, Yasmin Chaudhry, Grant Hall, Iliana Georgiana, Myra Hosnilo, Martin D. Curran, Malte Prickett, Surendra Panmar, Ian Goodfellow                                                                                                                                                                                                                                                                                                                |
| EPI_ISL_763817                                 | Virology Department, Royal Infirmary of Edinburgh, NHS Lothian / School of Biological Sciences, University of Edinburgh / Institute of Genetics and Molecular Medicine, University of Edinburgh | COVID-19 Genomics UK (COG-UK) Consortium | McHugh M, Dewar R, Rooke S, Gallagher M, Balcaiza C, O'Toole A, Schar E, Hill V, McCrone JT, Colquhoun R, Yu X, Jackson B, Rambaut A, Williams TC, Templeton K                                                                                                                                                                                                                                                                                                |
| EPI_ISL_763820, EPI_ISL_763821                 | Wales Specialist Virology Centre Sequencing lab: Pathogen Genomics Unit                                                                                                                         | COVID-19 Genomics UK (COG-UK) Consortium | Catherine Moore, Johnathan Evans, Laura Gifford, Malorie Perry, Simon Cottrell, Angela Marchbank, Alec Birchley, Alexander Adams, Amy Gaskin, Bree Gatica-Wilcox, Jason Coombes, Joel Soutigale, Lauren Gilbert, Lee Graham, Nicole Pachiani, Sara Kunzrens-Summerhayes, Sarah Taylor, Sophie Jones, Sara Rey, Matthew Bull, Joanne Watkins, Sally Corden, Tom Connor                                                                                         |
| EPI_ISL_763825                                 | Centre for Enzyme Innovation, University of Portsmouth / Translational Research Laboratory, Portsmouth Hospitals NHS Trust                                                                      | COVID-19 Genomics UK (COG-UK) Consortium | Angela Beckett, Yann Bourgeois, Garry Scarlett, Sharon Glaysher, Scott Elliott, Kelly Bicknell, Robert Impy, Alyson Lloyd, Sarah Wylie, Ethan Butcher, Anoop Chautan, Samuel Hooson                                                                                                                                                                                                                                                                           |
| EPI_ISL_764063                                 | Wales Specialist Virology Centre Sequencing lab: Pathogen Genomics Unit                                                                                                                         | COVID-19 Genomics UK (COG-UK) Consortium | Catherine Moore, Johnathan Evans, Laura Gifford, Malorie Perry, Simon Cottrell, Angela Marchbank, Alec Birchley, Alexander Adams, Amy Gaskin, Bree Gatica-Wilcox, Jason Coombes, Joel Soutigale, Lauren Gilbert, Lee Graham, Nicole Pachiani, Sara Kunzrens-Summerhayes, Sarah Taylor, Sophie Jones, Sara Rey, Matthew Bull, Joanne Watkins, Sally Corden, Tom Connor                                                                                         |
| EPI_ISL_764137, EPI_ISL_764139                 | University of Exeter                                                                                                                                                                            | COVID-19 Genomics UK (COG-UK) Consortium | Ben Temperton, Aaron Jeffries, Michelle Michelsen, Joanna Warwick-Dugdale, Audrey Fardos, Robyn Manley, Stephen Mitchell, Jane Masoli                                                                                                                                                                                                                                                                                                                         |
| EPI_ISL_764140                                 | Centre for Enzyme Innovation, University of Portsmouth / Translational Research Laboratory, Portsmouth Hospitals NHS Trust                                                                      | COVID-19 Genomics UK (COG-UK) Consortium | Angela Beckett, Yann Bourgeois, Garry Scarlett, Sharon Glaysher, Scott Elliott, Kelly Bicknell, Robert Impy, Alyson Lloyd, Sarah Wylie, Ethan Butcher, Anoop Chautan, Samuel Hooson                                                                                                                                                                                                                                                                           |
| EPI_ISL_764145                                 | Virology Department, Sheffield Teaching Hospitals NHS Foundation Trust/Department of Infection, Immunity and Cardiovascular Disease, The Medical School, University of Sheffield                | COVID-19 Genomics UK (COG-UK) Consortium | Thushan de Silva, Matthew Parker, Nikki Smith, Adri Angyal, Rebecca Brown, Luke Green, Rachel Tucker, Paul Parsons, Danielle Groves, Katie Johnson, Laura Carrilero, Alex Keesley, Dave Partridge, Matthew Wyles, Benjamin Lindsey, Mehmet Yavuz, Mohammad Raza, Carad Evans                                                                                                                                                                                  |
| EPI_ISL_764152                                 | Centre for Enzyme Innovation, University of Portsmouth / Translational Research Laboratory, Portsmouth Hospitals NHS Trust                                                                      | COVID-19 Genomics UK (COG-UK) Consortium | Angela Beckett, Yann Bourgeois, Garry Scarlett, Sharon Glaysher, Scott Elliott, Kelly Bicknell, Robert Impy, Alyson Lloyd, Sarah Wylie, Ethan Butcher, Anoop Chautan, Samuel Hooson                                                                                                                                                                                                                                                                           |
| EPI_ISL_764153                                 | Virology Department, Sheffield Teaching Hospitals NHS Foundation Trust/Department of Infection, Immunity and Cardiovascular Disease, The Medical School, University of Sheffield                | COVID-19 Genomics UK (COG-UK) Consortium | Thushan de Silva, Matthew Parker, Nikki Smith, Adri Angyal, Rebecca Brown, Luke Green, Rachel Tucker, Paul Parsons, Danielle Groves, Katie Johnson, Laura Carrilero, Alex Keesley, Dave Partridge, Matthew Wyles, Benjamin Lindsey, Mehmet Yavuz, Mohammad Raza, Carad Evans                                                                                                                                                                                  |
| EPI_ISL_764156                                 | Wales Specialist Virology Centre Sequencing lab: Pathogen Genomics Unit                                                                                                                         | COVID-19 Genomics UK (COG-UK) Consortium | Catherine Moore, Johnathan Evans, Laura Gifford, Malorie Perry, Simon Cottrell, Angela Marchbank, Alec Birchley, Alexander Adams, Amy Gaskin, Bree Gatica-Wilcox, Jason Coombes, Joel Soutigale, Lauren Gilbert, Lee Graham, Nicole Pachiani, Sara Kunzrens-Summerhayes, Sarah Taylor, Sophie Jones, Sara Rey, Matthew Bull, Joanne Watkins, Sally Corden, Tom Connor                                                                                         |
| EPI_ISL_764167                                 | Virology Department, Sheffield Teaching Hospitals NHS Foundation Trust/Department of Infection, Immunity and Cardiovascular Disease, The Medical School, University of Sheffield                | COVID-19 Genomics UK (COG-UK) Consortium | Thushan de Silva, Matthew Parker, Nikki Smith, Adri Angyal, Rebecca Brown, Luke Green, Rachel Tucker, Paul Parsons, Danielle Groves, Katie Johnson, Laura Carrilero, Alex Keesley, Dave Partridge, Matthew Wyles, Benjamin Lindsey, Mehmet Yavuz, Mohammad Raza, Carad Evans                                                                                                                                                                                  |
| EPI_ISL_764173                                 | Regional Virus Laboratory, Belfast Health and Social Care Trust                                                                                                                                 | COVID-19 Genomics UK (COG-UK) Consortium | Conall McCaughey, James McKenna, Tanya Curran, Susan Feeley, Alison Watt, Ciara Cox, Mairead Connor, Zolian Mohar, David Simpson, Derek Fairley                                                                                                                                                                                                                                                                                                               |
| EPI_ISL_764178, EPI_ISL_764184                 | University of Exeter                                                                                                                                                                            | COVID-19 Genomics UK (COG-UK) Consortium | Ben Temperton, Aaron Jeffries, Michelle Michelsen, Joanna Warwick-Dugdale, Audrey Fardos, Robyn Manley, Stephen Mitchell, Jane Masoli                                                                                                                                                                                                                                                                                                                         |
| EPI_ISL_764193                                 | Centre for Enzyme Innovation, University of Portsmouth / Translational Research Laboratory, Portsmouth Hospitals NHS Trust                                                                      | COVID-19 Genomics UK (COG-UK) Consortium | Angela Beckett, Yann Bourgeois, Garry Scarlett, Sharon Glaysher, Scott Elliott, Kelly Bicknell, Robert Impy, Alyson Lloyd, Sarah Wylie, Ethan Butcher, Anoop Chautan, Samuel Hooson                                                                                                                                                                                                                                                                           |
| EPI_ISL_764194                                 | Quadram Institute Bioscience                                                                                                                                                                    | COVID-19 Genomics UK (COG-UK) Consortium | Dave J. Baker, Gemma L. Kay, Alp Aydin, Thanh Le-Viet, Steven Rudder, Ara P. T. Tedim, Anastasia Kolyva, Maria Diaz, Leonardo de Oliveira Martins, Nabil-Fareed Alkhan, Lizzie Meadows, Rachael Stanley, Ngoyi Elnurogo, Muhammed Yasir, Nicholas M. Thomson, Alexander J. Trotter, Rachel Gilroy, Samuel Bloomfield, Claire Stuart, Andrew Bell, Reemesh Prakash, Samir Dervisevic, Alison E. Mather, John Wain, Mark Webber, Andrew J. Page, Justin O'Grady |
| EPI_ISL_764195                                 | Virology Department, Royal Infirmary of Edinburgh, NHS Lothian / School of Biological Sciences, University of Edinburgh / Institute of Genetics and Molecular Medicine, University of Edinburgh | COVID-19 Genomics UK (COG-UK) Consortium | McHugh M, Dewar R, Rooke S, Gallagher M, Balcaiza C, O'Toole A, Schar E, Hill V, McCrone JT, Colquhoun R, Yu X, Jackson B, Rambaut A, Williams TC, Templeton K                                                                                                                                                                                                                                                                                                |
| EPI_ISL_764197                                 | University of Exeter                                                                                                                                                                            | COVID-19 Genomics UK (COG-UK) Consortium | Ben Temperton, Aaron Jeffries, Michelle Michelsen, Joanna Warwick-Dugdale, Audrey Fardos, Robyn Manley, Stephen Mitchell, Jane Masoli                                                                                                                                                                                                                                                                                                                         |
| EPI_ISL_764201, EPI_ISL_764203                 | Wales Specialist Virology Centre Sequencing lab: Pathogen Genomics Unit                                                                                                                         | COVID-19 Genomics UK (COG-UK) Consortium | Catherine Moore, Johnathan Evans, Laura Gifford, Malorie Perry, Simon Cottrell, Angela Marchbank, Alec Birchley, Alexander Adams, Amy Gaskin, Bree Gatica-Wilcox, Jason Coombes, Joel Soutigale, Lauren Gilbert, Lee Graham, Nicole Pachiani, Sara Kunzrens-Summerhayes, Sarah Taylor, Sophie Jones, Sara Rey, Matthew Bull, Joanne Watkins, Sally Corden, Tom Connor                                                                                         |
| EPI_ISL_764204                                 | Department of Pathology, University of Cambridge                                                                                                                                                | COVID-19 Genomics UK (COG-UK) Consortium | Aminu S. Jalun, Yasmin Chaudhry, Grant Hall, Iliana Georgiana, Myra Hosnilo, Martin D. Curran, Malte Prickett, Surendra Panmar, Ian Goodfellow                                                                                                                                                                                                                                                                                                                |
| EPI_ISL_764205, EPI_ISL_764207                 | Quadram Institute Bioscience                                                                                                                                                                    | COVID-19 Genomics UK (COG-UK) Consortium | Dave J. Baker, Gemma L. Kay, Alp Aydin, Thanh Le-Viet, Steven Rudder, Ara P. T. Tedim, Anastasia Kolyva, Maria Diaz, Leonardo de Oliveira Martins, Nabil-Fareed Alkhan, Lizzie Meadows, Rachael Stanley, Ngoyi Elnurogo, Muhammed Yasir, Nicholas M. Thomson, Alexander J. Trotter, Rachel Gilroy, Samuel Bloomfield, Claire Stuart, Andrew Bell, Reemesh Prakash, Samir Dervisevic, Alison E. Mather, John Wain, Mark Webber, Andrew J. Page, Justin O'Grady |
| EPI_ISL_764209                                 | Department of Pathology, University of Cambridge                                                                                                                                                | COVID-19 Genomics UK (COG-UK) Consortium | Aminu S. Jalun, Yasmin Chaudhry, Grant Hall, Iliana Georgiana, Myra Hosnilo, Martin D. Curran, Malte Prickett, Surendra Panmar, Ian Goodfellow                                                                                                                                                                                                                                                                                                                |
| EPI_ISL_764213                                 | Virology Department, Sheffield Teaching Hospitals NHS Foundation Trust/Department of Infection, Immunity and Cardiovascular Disease, The Medical School, University of Sheffield                | COVID-19 Genomics UK (COG-UK) Consortium | Thushan de Silva, Matthew Parker, Nikki Smith, Adri Angyal, Rebecca Brown, Luke Green, Rachel Tucker, Paul Parsons, Danielle Groves, Katie Johnson, Laura Carrilero, Alex Keesley, Dave Partridge, Matthew Wyles, Benjamin Lindsey, Mehmet Yavuz, Mohammad Raza, Carad Evans                                                                                                                                                                                  |
| EPI_ISL_764214                                 | University of Exeter                                                                                                                                                                            | COVID-19 Genomics UK (COG-UK) Consortium | Ben Temperton, Aaron Jeffries, Michelle Michelsen, Joanna Warwick-Dugdale, Audrey Fardos, Robyn Manley, Stephen Mitchell, Jane Masoli                                                                                                                                                                                                                                                                                                                         |
| EPI_ISL_764216                                 | Virology Department, Sheffield Teaching Hospitals NHS Foundation Trust/Department of Infection, Immunity and Cardiovascular Disease, The Medical School, University of Sheffield                | COVID-19 Genomics UK (COG-UK) Consortium | Thushan de Silva, Matthew Parker, Nikki Smith, Adri Angyal, Rebecca Brown, Luke Green, Rachel Tucker, Paul Parsons, Danielle Groves, Katie Johnson, Laura Carrilero, Alex Keesley, Dave Partridge, Matthew Wyles, Benjamin Lindsey, Mehmet Yavuz, Mohammad Raza, Carad Evans                                                                                                                                                                                  |







|                                                                                                                                                                                                                                                                                                                                                                                                                                                                                                                                                                |           |                                                                                   |                                                                               |                                                                                                                                                                                                                                                                                                                                                                                                                                            |
|----------------------------------------------------------------------------------------------------------------------------------------------------------------------------------------------------------------------------------------------------------------------------------------------------------------------------------------------------------------------------------------------------------------------------------------------------------------------------------------------------------------------------------------------------------------|-----------|-----------------------------------------------------------------------------------|-------------------------------------------------------------------------------|--------------------------------------------------------------------------------------------------------------------------------------------------------------------------------------------------------------------------------------------------------------------------------------------------------------------------------------------------------------------------------------------------------------------------------------------|
| EP1_ISL_767942, EP1_ISL_767953, EP1_ISL_767960, EP1_ISL_767968, EP1_ISL_767977, EP1_ISL_767995, EP1_ISL_768000, EP1_ISL_768004, EP1_ISL_768005, EP1_ISL_768010, EP1_ISL_768013, EP1_ISL_768017, EP1_ISL_768020, EP1_ISL_768026, EP1_ISL_768032, EP1_ISL_768037, EP1_ISL_768038, EP1_ISL_768046, EP1_ISL_768146, EP1_ISL_768163, EP1_ISL_768175, EP1_ISL_768176, EP1_ISL_768193, EP1_ISL_768208, EP1_ISL_768215, EP1_ISL_768222, EP1_ISL_768230, EP1_ISL_768236, EP1_ISL_768242, EP1_ISL_768246, EP1_ISL_768257, EP1_ISL_768296, EP1_ISL_768309, EP1_ISL_768311 | see above | Vollier AG                                                                        | Department of Biosystems Science and Engineering, ETH Zurich                  | Jackson, Ian Johnston, Dominic Kwiatkowski, Cordelia Langford, John Sillitoe on behalf of the Wellcome Sanger Institute COVID-19 Surveillance Team                                                                                                                                                                                                                                                                                         |
| EP1_ISL_768633                                                                                                                                                                                                                                                                                                                                                                                                                                                                                                                                                 |           | Jena University Hospital, Institute for Infectious Diseases and Infection Control | Institute of infectious medicine & hospital hygiene, Case-Group               |                                                                                                                                                                                                                                                                                                                                                                                                                                            |
| EP1_ISL_768649, EP1_ISL_768666, EP1_ISL_768703                                                                                                                                                                                                                                                                                                                                                                                                                                                                                                                 |           | Pathogen Genomics Center, National Institute of Infectious Diseases               | Pathogen Genomics Center, National Institute of Infectious Diseases           |                                                                                                                                                                                                                                                                                                                                                                                                                                            |
| EP1_ISL_768726, EP1_ISL_768727                                                                                                                                                                                                                                                                                                                                                                                                                                                                                                                                 |           | Jena University Hospital, Institute for Infectious Diseases and Infection Control | Institute of infectious medicine & hospital hygiene, Case-Group               |                                                                                                                                                                                                                                                                                                                                                                                                                                            |
| EP1_ISL_768773, EP1_ISL_768776                                                                                                                                                                                                                                                                                                                                                                                                                                                                                                                                 |           | AID                                                                               | Irish Coronavirus Sequencing Consortium - National Virus Reference Laboratory | Spoti, Riccardo; Marquet, Mike; Pleiz, Matthias W.; Brandt, Christian                                                                                                                                                                                                                                                                                                                                                                      |
| EP1_ISL_768808, EP1_ISL_768809, EP1_ISL_768810, EP1_ISL_768813, EP1_ISL_768814                                                                                                                                                                                                                                                                                                                                                                                                                                                                                 |           | Respiratory Virus Unit, National Infection Services, Public Health England        | COVID-19 Genomics UK (COG-UK) Consortium                                      | Tsuyoshi Saizuka, Kenzaro Itohawa, Rina Tanaka, Masanori Hashino, Makoto Kuroda                                                                                                                                                                                                                                                                                                                                                            |
| EP1_ISL_768840                                                                                                                                                                                                                                                                                                                                                                                                                                                                                                                                                 |           | Laboratoire Biologie                                                              |                                                                               | Spoti, Riccardo; Marquet, Mike; Pleiz, Matthias W.; Brandt, Christian                                                                                                                                                                                                                                                                                                                                                                      |
| EP1_ISL_768842                                                                                                                                                                                                                                                                                                                                                                                                                                                                                                                                                 |           | Lighthouse Lab in Alderley Park                                                   | Laboratoire de Biotechnologie                                                 | Mourat Ouadghiri, Tarik Aaminz, Mohammed Waïd Chemao Elhiri, Mohamed Chemaoi, Haraz Darka, Aïda Alaoui, Othmane Torzani, Amira Bernouda, Jacquelyn Wynn, Mairead Hyland, The Lighthouse Lab in Alderley Park and Alex Alderton, Roberto Amato, Sonia Goncalves, Ewan Harrison, David K. Jackson, Ian Johnston, Dominic Kwiatkowski, Cordelia Langford, John Sillitoe on behalf of the Wellcome Sanger Institute COVID-19 Surveillance Team |
| EP1_ISL_768856, EP1_ISL_768883, EP1_ISL_768888, EP1_ISL_768891                                                                                                                                                                                                                                                                                                                                                                                                                                                                                                 |           | Lighthouse Lab in Milton Keynes                                                   | Wellcome Sanger Institute for the COVID-19 Genomics UK (COG-UK) Consortium    | Michael Carr, Gabriel Gonzalez, Alejandro Abner Garcia Leon, Patrick Mallon                                                                                                                                                                                                                                                                                                                                                                |
| EP1_ISL_768899                                                                                                                                                                                                                                                                                                                                                                                                                                                                                                                                                 |           | Lighthouse Lab in Alderley Park                                                   | Wellcome Sanger Institute for the COVID-19 Genomics UK (COG-UK) Consortium    |                                                                                                                                                                                                                                                                                                                                                                                                                                            |
| EP1_ISL_768919, EP1_ISL_768921, EP1_ISL_768929, EP1_ISL_768937, EP1_ISL_768938, EP1_ISL_768949, EP1_ISL_768965, EP1_ISL_768970, EP1_ISL_768990, EP1_ISL_768995, EP1_ISL_768997, EP1_ISL_768998, EP1_ISL_769104, EP1_ISL_769108, EP1_ISL_769112, EP1_ISL_769113, EP1_ISL_769128, EP1_ISL_769133, EP1_ISL_769136, EP1_ISL_769143, EP1_ISL_769159, EP1_ISL_769178, EP1_ISL_769185, EP1_ISL_769190, EP1_ISL_769219, EP1_ISL_769220                                                                                                                                 | see above | Lighthouse Lab in Cambridge                                                       | Wellcome Sanger Institute for the COVID-19 Genomics UK (COG-UK) Consortium    | Rooi Hoes, The Lighthouse Lab in Cambridge and Alex Alderton, Roberto Amato, Sonia Goncalves, Ewan Harrison, David K. Jackson, Ian Johnston, Dominic Kwiatkowski, Cordelia Langford, John Sillitoe on behalf of the Wellcome Sanger Institute COVID-19 Surveillance Team                                                                                                                                                                   |
| EP1_ISL_769230                                                                                                                                                                                                                                                                                                                                                                                                                                                                                                                                                 |           | Lighthouse Lab in Milton Keynes                                                   | Wellcome Sanger Institute for the COVID-19 Genomics UK (COG-UK) Consortium    |                                                                                                                                                                                                                                                                                                                                                                                                                                            |
| EP1_ISL_769233, EP1_ISL_769246                                                                                                                                                                                                                                                                                                                                                                                                                                                                                                                                 |           | Lighthouse Lab in Glasgow                                                         | Wellcome Sanger Institute for the COVID-19 Genomics UK (COG-UK) Consortium    | The Lighthouse Lab in Milton Keynes and Alex Alderton, Roberto Amato, Sonia Goncalves, Ewan Harrison, David K. Jackson, Ian Johnston, Dominic Kwiatkowski, Cordelia Langford, John Sillitoe on behalf of the Wellcome Sanger Institute COVID-19 Surveillance Team                                                                                                                                                                          |
| EP1_ISL_769251                                                                                                                                                                                                                                                                                                                                                                                                                                                                                                                                                 |           | Lighthouse Lab in Milton Keynes                                                   | Wellcome Sanger Institute for the COVID-19 Genomics UK (COG-UK) Consortium    |                                                                                                                                                                                                                                                                                                                                                                                                                                            |
| EP1_ISL_769252, EP1_ISL_769254                                                                                                                                                                                                                                                                                                                                                                                                                                                                                                                                 |           | Lighthouse Lab in Glasgow                                                         | Wellcome Sanger Institute for the COVID-19 Genomics UK (COG-UK) Consortium    | Harper VanSteenhouse, Yurni Kasai, David Gray, Carol Clugston, Anna Dominiczak and Alex Alderton, Roberto Amato, Sonia Goncalves, Ewan Harrison, David K. Jackson, Ian Johnston, Dominic Kwiatkowski, Cordelia Langford, John Sillitoe on behalf of the Wellcome Sanger Institute COVID-19 Surveillance Team                                                                                                                               |
| EP1_ISL_769256                                                                                                                                                                                                                                                                                                                                                                                                                                                                                                                                                 |           | Lighthouse Lab in Milton Keynes                                                   | Wellcome Sanger Institute for the COVID-19 Genomics UK (COG-UK) Consortium    |                                                                                                                                                                                                                                                                                                                                                                                                                                            |
| EP1_ISL_769261, EP1_ISL_769273, EP1_ISL_769276, EP1_ISL_769284, EP1_ISL_769291                                                                                                                                                                                                                                                                                                                                                                                                                                                                                 |           | Lighthouse Lab in Glasgow                                                         | Wellcome Sanger Institute for the COVID-19 Genomics UK (COG-UK) Consortium    | Harper VanSteenhouse, Yurni Kasai, David Gray, Carol Clugston, Anna Dominiczak and Alex Alderton, Roberto Amato, Sonia Goncalves, Ewan Harrison, David K. Jackson, Ian Johnston, Dominic Kwiatkowski, Cordelia Langford, John Sillitoe on behalf of the Wellcome Sanger Institute COVID-19 Surveillance Team                                                                                                                               |
| EP1_ISL_769293, EP1_ISL_769295, EP1_ISL_769299                                                                                                                                                                                                                                                                                                                                                                                                                                                                                                                 |           | Lighthouse Lab in Milton Keynes                                                   | Wellcome Sanger Institute for the COVID-19 Genomics UK (COG-UK) Consortium    |                                                                                                                                                                                                                                                                                                                                                                                                                                            |
| EP1_ISL_769310, EP1_ISL_769314                                                                                                                                                                                                                                                                                                                                                                                                                                                                                                                                 |           | Lighthouse Lab in Glasgow                                                         | Wellcome Sanger Institute for the COVID-19 Genomics UK (COG-UK) Consortium    | The Lighthouse Lab in Milton Keynes and Alex Alderton, Roberto Amato, Sonia Goncalves, Ewan Harrison, David K. Jackson, Ian Johnston, Dominic Kwiatkowski, Cordelia Langford, John Sillitoe on behalf of the Wellcome Sanger Institute COVID-19 Surveillance Team                                                                                                                                                                          |
| EP1_ISL_769315                                                                                                                                                                                                                                                                                                                                                                                                                                                                                                                                                 |           | Lighthouse Lab in Milton Keynes                                                   | Wellcome Sanger Institute for the COVID-19 Genomics UK (COG-UK) Consortium    |                                                                                                                                                                                                                                                                                                                                                                                                                                            |
| EP1_ISL_769316, EP1_ISL_769322                                                                                                                                                                                                                                                                                                                                                                                                                                                                                                                                 |           | Lighthouse Lab in Glasgow                                                         | Wellcome Sanger Institute for the COVID-19 Genomics UK (COG-UK) Consortium    | Harper VanSteenhouse, Yurni Kasai, David Gray, Carol Clugston, Anna Dominiczak and Alex Alderton, Roberto Amato, Sonia Goncalves, Ewan Harrison, David K. Jackson, Ian Johnston, Dominic Kwiatkowski, Cordelia Langford, John Sillitoe on behalf of the Wellcome Sanger Institute COVID-19 Surveillance Team                                                                                                                               |
| EP1_ISL_769326                                                                                                                                                                                                                                                                                                                                                                                                                                                                                                                                                 |           | Lighthouse Lab in Milton Keynes                                                   | Wellcome Sanger Institute for the COVID-19 Genomics UK (COG-UK) Consortium    |                                                                                                                                                                                                                                                                                                                                                                                                                                            |
| EP1_ISL_769329, EP1_ISL_769334, EP1_ISL_769335                                                                                                                                                                                                                                                                                                                                                                                                                                                                                                                 |           | Lighthouse Lab in Glasgow                                                         | Wellcome Sanger Institute for the COVID-19 Genomics UK (COG-UK) Consortium    | Harper VanSteenhouse, Yurni Kasai, David Gray, Carol Clugston, Anna Dominiczak and Alex Alderton, Roberto Amato, Sonia Goncalves, Ewan Harrison, David K. Jackson, Ian Johnston, Dominic Kwiatkowski, Cordelia Langford, John Sillitoe on behalf of the Wellcome Sanger Institute COVID-19 Surveillance Team                                                                                                                               |
| EP1_ISL_769337, EP1_ISL_769340, EP1_ISL_769342, EP1_ISL_769347, EP1_ISL_769354                                                                                                                                                                                                                                                                                                                                                                                                                                                                                 |           | Lighthouse Lab in Milton Keynes                                                   | Wellcome Sanger Institute for the COVID-19 Genomics UK (COG-UK) Consortium    | The Lighthouse Lab in Milton Keynes and Alex Alderton, Roberto Amato, Sonia Goncalves, Ewan Harrison, David K. Jackson, Ian Johnston, Dominic Kwiatkowski, Cordelia Langford, John Sillitoe on behalf of the Wellcome Sanger Institute COVID-19 Surveillance Team                                                                                                                                                                          |
| EP1_ISL_769355                                                                                                                                                                                                                                                                                                                                                                                                                                                                                                                                                 |           | Lighthouse Lab in Glasgow                                                         | Wellcome Sanger Institute for the COVID-19 Genomics UK (COG-UK) Consortium    |                                                                                                                                                                                                                                                                                                                                                                                                                                            |
| EP1_ISL_769375                                                                                                                                                                                                                                                                                                                                                                                                                                                                                                                                                 |           | Lighthouse Lab in Milton Keynes                                                   | Wellcome Sanger Institute for the COVID-19 Genomics UK (COG-UK) Consortium    | Harper VanSteenhouse, Yurni Kasai, David Gray, Carol Clugston, Anna Dominiczak and Alex Alderton, Roberto Amato, Sonia Goncalves, Ewan Harrison, David K. Jackson, Ian Johnston, Dominic Kwiatkowski, Cordelia Langford, John Sillitoe on behalf of the Wellcome Sanger Institute COVID-19 Surveillance Team                                                                                                                               |
| EP1_ISL_769391                                                                                                                                                                                                                                                                                                                                                                                                                                                                                                                                                 |           | Lighthouse Lab in Glasgow                                                         | Wellcome Sanger Institute for the COVID-19 Genomics UK (COG-UK) Consortium    | Harper VanSteenhouse, Yurni Kasai, David Gray, Carol Clugston, Anna Dominiczak and Alex Alderton, Roberto Amato, Sonia Goncalves, Ewan Harrison, David K. Jackson, Ian Johnston, Dominic Kwiatkowski, Cordelia Langford, John Sillitoe on behalf of the Wellcome Sanger Institute COVID-19 Surveillance Team                                                                                                                               |
| EP1_ISL_769393                                                                                                                                                                                                                                                                                                                                                                                                                                                                                                                                                 |           | Lighthouse Lab in Milton Keynes                                                   | Wellcome Sanger Institute for the COVID-19 Genomics UK (COG-UK) Consortium    | The Lighthouse Lab in Milton Keynes and Alex Alderton, Roberto Amato, Sonia Goncalves, Ewan Harrison, David K. Jackson, Ian Johnston, Dominic Kwiatkowski, Cordelia Langford, John Sillitoe on behalf of the Wellcome Sanger Institute COVID-19 Surveillance Team                                                                                                                                                                          |



|                                                                                                                                                                                                                                                                                                                                                                                                                                                                                                                                                                                                                                                |                                                                                               |                                                                                              |                                                                                                                                                                                                                                                                                                             |
|------------------------------------------------------------------------------------------------------------------------------------------------------------------------------------------------------------------------------------------------------------------------------------------------------------------------------------------------------------------------------------------------------------------------------------------------------------------------------------------------------------------------------------------------------------------------------------------------------------------------------------------------|-----------------------------------------------------------------------------------------------|----------------------------------------------------------------------------------------------|-------------------------------------------------------------------------------------------------------------------------------------------------------------------------------------------------------------------------------------------------------------------------------------------------------------|
| EPI_ISL_769628, EPI_ISL_769632                                                                                                                                                                                                                                                                                                                                                                                                                                                                                                                                                                                                                 | Lighthouse Lab in Milton Keynes                                                               | Welcome Sanger Institute for the COVID-19 Genomics UK (COG-UK) Consortium                    | The Lighthouse Lab in Milton Keynes and Alex Alderton, Roberto Amato, Sonia Goncalves, Ewan Harrison, David K. Jackson, Ian Johnston, Dominic Kwiatkowski, Cordelia Langford, John Sillitoe on behalf of the Welcome Sanger Institute COVID-19 Surveillance Team                                            |
| EPI_ISL_769641, EPI_ISL_769644                                                                                                                                                                                                                                                                                                                                                                                                                                                                                                                                                                                                                 | Lighthouse Lab in Glasgow                                                                     | Welcome Sanger Institute for the COVID-19 Genomics UK (COG-UK) Consortium                    | Harper VanSteenhouse, Yurni Kasai, David Gray, Carol Clugston, Anna Dominiczak and Alex Alderton, Roberto Amato, Sonia Goncalves, Ewan Harrison, David K. Jackson, Ian Johnston, Dominic Kwiatkowski, Cordelia Langford, John Sillitoe on behalf of the Welcome Sanger Institute COVID-19 Surveillance Team |
| EPI_ISL_769646, EPI_ISL_769647                                                                                                                                                                                                                                                                                                                                                                                                                                                                                                                                                                                                                 | Lighthouse Lab in Milton Keynes                                                               | Welcome Sanger Institute for the COVID-19 Genomics UK (COG-UK) Consortium                    | The Lighthouse Lab in Milton Keynes and Alex Alderton, Roberto Amato, Sonia Goncalves, Ewan Harrison, David K. Jackson, Ian Johnston, Dominic Kwiatkowski, Cordelia Langford, John Sillitoe on behalf of the Welcome Sanger Institute COVID-19 Surveillance Team                                            |
| EPI_ISL_769652, EPI_ISL_769661, EPI_ISL_769662                                                                                                                                                                                                                                                                                                                                                                                                                                                                                                                                                                                                 | Lighthouse Lab in Glasgow                                                                     | Welcome Sanger Institute for the COVID-19 Genomics UK (COG-UK) Consortium                    | Harper VanSteenhouse, Yurni Kasai, David Gray, Carol Clugston, Anna Dominiczak and Alex Alderton, Roberto Amato, Sonia Goncalves, Ewan Harrison, David K. Jackson, Ian Johnston, Dominic Kwiatkowski, Cordelia Langford, John Sillitoe on behalf of the Welcome Sanger Institute COVID-19 Surveillance Team |
| EPI_ISL_769663, EPI_ISL_769665                                                                                                                                                                                                                                                                                                                                                                                                                                                                                                                                                                                                                 | Lighthouse Lab in Milton Keynes                                                               | Welcome Sanger Institute for the COVID-19 Genomics UK (COG-UK) Consortium                    | The Lighthouse Lab in Milton Keynes and Alex Alderton, Roberto Amato, Sonia Goncalves, Ewan Harrison, David K. Jackson, Ian Johnston, Dominic Kwiatkowski, Cordelia Langford, John Sillitoe on behalf of the Welcome Sanger Institute COVID-19 Surveillance Team                                            |
| EPI_ISL_769677                                                                                                                                                                                                                                                                                                                                                                                                                                                                                                                                                                                                                                 | Lighthouse Lab in Glasgow                                                                     | Welcome Sanger Institute for the COVID-19 Genomics UK (COG-UK) Consortium                    | Harper VanSteenhouse, Yurni Kasai, David Gray, Carol Clugston, Anna Dominiczak and Alex Alderton, Roberto Amato, Sonia Goncalves, Ewan Harrison, David K. Jackson, Ian Johnston, Dominic Kwiatkowski, Cordelia Langford, John Sillitoe on behalf of the Welcome Sanger Institute COVID-19 Surveillance Team |
| EPI_ISL_769679, EPI_ISL_769684                                                                                                                                                                                                                                                                                                                                                                                                                                                                                                                                                                                                                 | Lighthouse Lab in Milton Keynes                                                               | Welcome Sanger Institute for the COVID-19 Genomics UK (COG-UK) Consortium                    | The Lighthouse Lab in Milton Keynes and Alex Alderton, Roberto Amato, Sonia Goncalves, Ewan Harrison, David K. Jackson, Ian Johnston, Dominic Kwiatkowski, Cordelia Langford, John Sillitoe on behalf of the Welcome Sanger Institute COVID-19 Surveillance Team                                            |
| EPI_ISL_769687, EPI_ISL_769689, EPI_ISL_769691                                                                                                                                                                                                                                                                                                                                                                                                                                                                                                                                                                                                 | Lighthouse Lab in Glasgow                                                                     | Welcome Sanger Institute for the COVID-19 Genomics UK (COG-UK) Consortium                    | Harper VanSteenhouse, Yurni Kasai, David Gray, Carol Clugston, Anna Dominiczak and Alex Alderton, Roberto Amato, Sonia Goncalves, Ewan Harrison, David K. Jackson, Ian Johnston, Dominic Kwiatkowski, Cordelia Langford, John Sillitoe on behalf of the Welcome Sanger Institute COVID-19 Surveillance Team |
| EPI_ISL_769692, EPI_ISL_769698, EPI_ISL_769701, EPI_ISL_769707, EPI_ISL_769710                                                                                                                                                                                                                                                                                                                                                                                                                                                                                                                                                                 | Lighthouse Lab in Milton Keynes                                                               | Welcome Sanger Institute for the COVID-19 Genomics UK (COG-UK) Consortium                    | The Lighthouse Lab in Milton Keynes and Alex Alderton, Roberto Amato, Sonia Goncalves, Ewan Harrison, David K. Jackson, Ian Johnston, Dominic Kwiatkowski, Cordelia Langford, John Sillitoe on behalf of the Welcome Sanger Institute COVID-19 Surveillance Team                                            |
| EPI_ISL_769711, EPI_ISL_769724                                                                                                                                                                                                                                                                                                                                                                                                                                                                                                                                                                                                                 | Lighthouse Lab in Glasgow                                                                     | Welcome Sanger Institute for the COVID-19 Genomics UK (COG-UK) Consortium                    | Harper VanSteenhouse, Yurni Kasai, David Gray, Carol Clugston, Anna Dominiczak and Alex Alderton, Roberto Amato, Sonia Goncalves, Ewan Harrison, David K. Jackson, Ian Johnston, Dominic Kwiatkowski, Cordelia Langford, John Sillitoe on behalf of the Welcome Sanger Institute COVID-19 Surveillance Team |
| EPI_ISL_769733                                                                                                                                                                                                                                                                                                                                                                                                                                                                                                                                                                                                                                 | Lighthouse Lab in Milton Keynes                                                               | Welcome Sanger Institute for the COVID-19 Genomics UK (COG-UK) Consortium                    | The Lighthouse Lab in Milton Keynes and Alex Alderton, Roberto Amato, Sonia Goncalves, Ewan Harrison, David K. Jackson, Ian Johnston, Dominic Kwiatkowski, Cordelia Langford, John Sillitoe on behalf of the Welcome Sanger Institute COVID-19 Surveillance Team                                            |
| EPI_ISL_769743                                                                                                                                                                                                                                                                                                                                                                                                                                                                                                                                                                                                                                 | Lighthouse Lab in Glasgow                                                                     | Welcome Sanger Institute for the COVID-19 Genomics UK (COG-UK) Consortium                    | Harper VanSteenhouse, Yurni Kasai, David Gray, Carol Clugston, Anna Dominiczak and Alex Alderton, Roberto Amato, Sonia Goncalves, Ewan Harrison, David K. Jackson, Ian Johnston, Dominic Kwiatkowski, Cordelia Langford, John Sillitoe on behalf of the Welcome Sanger Institute COVID-19 Surveillance Team |
| EPI_ISL_769744, EPI_ISL_769747                                                                                                                                                                                                                                                                                                                                                                                                                                                                                                                                                                                                                 | Lighthouse Lab in Milton Keynes                                                               | Welcome Sanger Institute for the COVID-19 Genomics UK (COG-UK) Consortium                    | The Lighthouse Lab in Milton Keynes and Alex Alderton, Roberto Amato, Sonia Goncalves, Ewan Harrison, David K. Jackson, Ian Johnston, Dominic Kwiatkowski, Cordelia Langford, John Sillitoe on behalf of the Welcome Sanger Institute COVID-19 Surveillance Team                                            |
| EPI_ISL_769751, EPI_ISL_769752, EPI_ISL_769753, EPI_ISL_769759, EPI_ISL_769768, EPI_ISL_769773                                                                                                                                                                                                                                                                                                                                                                                                                                                                                                                                                 | Lighthouse Lab in Glasgow                                                                     | Welcome Sanger Institute for the COVID-19 Genomics UK (COG-UK) Consortium                    | Harper VanSteenhouse, Yurni Kasai, David Gray, Carol Clugston, Anna Dominiczak and Alex Alderton, Roberto Amato, Sonia Goncalves, Ewan Harrison, David K. Jackson, Ian Johnston, Dominic Kwiatkowski, Cordelia Langford, John Sillitoe on behalf of the Welcome Sanger Institute COVID-19 Surveillance Team |
| EPI_ISL_769778, EPI_ISL_769786                                                                                                                                                                                                                                                                                                                                                                                                                                                                                                                                                                                                                 | Lighthouse Lab in Milton Keynes                                                               | Welcome Sanger Institute for the COVID-19 Genomics UK (COG-UK) Consortium                    | The Lighthouse Lab in Milton Keynes and Alex Alderton, Roberto Amato, Sonia Goncalves, Ewan Harrison, David K. Jackson, Ian Johnston, Dominic Kwiatkowski, Cordelia Langford, John Sillitoe on behalf of the Welcome Sanger Institute COVID-19 Surveillance Team                                            |
| EPI_ISL_769787, EPI_ISL_769794                                                                                                                                                                                                                                                                                                                                                                                                                                                                                                                                                                                                                 | Lighthouse Lab in Glasgow                                                                     | Welcome Sanger Institute for the COVID-19 Genomics UK (COG-UK) Consortium                    | Harper VanSteenhouse, Yurni Kasai, David Gray, Carol Clugston, Anna Dominiczak and Alex Alderton, Roberto Amato, Sonia Goncalves, Ewan Harrison, David K. Jackson, Ian Johnston, Dominic Kwiatkowski, Cordelia Langford, John Sillitoe on behalf of the Welcome Sanger Institute COVID-19 Surveillance Team |
| EPI_ISL_769800, EPI_ISL_769801                                                                                                                                                                                                                                                                                                                                                                                                                                                                                                                                                                                                                 | Lighthouse Lab in Milton Keynes                                                               | Welcome Sanger Institute for the COVID-19 Genomics UK (COG-UK) Consortium                    | The Lighthouse Lab in Milton Keynes and Alex Alderton, Roberto Amato, Sonia Goncalves, Ewan Harrison, David K. Jackson, Ian Johnston, Dominic Kwiatkowski, Cordelia Langford, John Sillitoe on behalf of the Welcome Sanger Institute COVID-19 Surveillance Team                                            |
| EPI_ISL_769802, EPI_ISL_769813                                                                                                                                                                                                                                                                                                                                                                                                                                                                                                                                                                                                                 | Lighthouse Lab in Glasgow                                                                     | Welcome Sanger Institute for the COVID-19 Genomics UK (COG-UK) Consortium                    | Harper VanSteenhouse, Yurni Kasai, David Gray, Carol Clugston, Anna Dominiczak and Alex Alderton, Roberto Amato, Sonia Goncalves, Ewan Harrison, David K. Jackson, Ian Johnston, Dominic Kwiatkowski, Cordelia Langford, John Sillitoe on behalf of the Welcome Sanger Institute COVID-19 Surveillance Team |
| EPI_ISL_769825, EPI_ISL_769828                                                                                                                                                                                                                                                                                                                                                                                                                                                                                                                                                                                                                 | Lighthouse Lab in Milton Keynes                                                               | Welcome Sanger Institute for the COVID-19 Genomics UK (COG-UK) Consortium                    | The Lighthouse Lab in Milton Keynes and Alex Alderton, Roberto Amato, Sonia Goncalves, Ewan Harrison, David K. Jackson, Ian Johnston, Dominic Kwiatkowski, Cordelia Langford, John Sillitoe on behalf of the Welcome Sanger Institute COVID-19 Surveillance Team                                            |
| EPI_ISL_769836                                                                                                                                                                                                                                                                                                                                                                                                                                                                                                                                                                                                                                 | Lighthouse Lab in Glasgow                                                                     | Welcome Sanger Institute for the COVID-19 Genomics UK (COG-UK) Consortium                    | Harper VanSteenhouse, Yurni Kasai, David Gray, Carol Clugston, Anna Dominiczak and Alex Alderton, Roberto Amato, Sonia Goncalves, Ewan Harrison, David K. Jackson, Ian Johnston, Dominic Kwiatkowski, Cordelia Langford, John Sillitoe on behalf of the Welcome Sanger Institute COVID-19 Surveillance Team |
| EPI_ISL_769849, EPI_ISL_769854, EPI_ISL_769860                                                                                                                                                                                                                                                                                                                                                                                                                                                                                                                                                                                                 | Lighthouse Lab in Milton Keynes                                                               | Welcome Sanger Institute for the COVID-19 Genomics UK (COG-UK) Consortium                    | The Lighthouse Lab in Milton Keynes and Alex Alderton, Roberto Amato, Sonia Goncalves, Ewan Harrison, David K. Jackson, Ian Johnston, Dominic Kwiatkowski, Cordelia Langford, John Sillitoe on behalf of the Welcome Sanger Institute COVID-19 Surveillance Team                                            |
| EPI_ISL_769861, EPI_ISL_769862                                                                                                                                                                                                                                                                                                                                                                                                                                                                                                                                                                                                                 | Lighthouse Lab in Glasgow                                                                     | Welcome Sanger Institute for the COVID-19 Genomics UK (COG-UK) Consortium                    | Harper VanSteenhouse, Yurni Kasai, David Gray, Carol Clugston, Anna Dominiczak and Alex Alderton, Roberto Amato, Sonia Goncalves, Ewan Harrison, David K. Jackson, Ian Johnston, Dominic Kwiatkowski, Cordelia Langford, John Sillitoe on behalf of the Welcome Sanger Institute COVID-19 Surveillance Team |
| EPI_ISL_769866, EPI_ISL_769867, EPI_ISL_769868, EPI_ISL_769873, EPI_ISL_769878                                                                                                                                                                                                                                                                                                                                                                                                                                                                                                                                                                 | Respiratory Virus Unit, National Infection Service, Public Health England                     | COVID-19 Genomics UK (COG-UK) Consortium                                                     | PHE Covid Sequencing Team                                                                                                                                                                                                                                                                                   |
| EPI_ISL_770038, EPI_ISL_770042, EPI_ISL_770048, EPI_ISL_770049                                                                                                                                                                                                                                                                                                                                                                                                                                                                                                                                                                                 | Centri Laboratoria                                                                            | Latvian Biomedical Research and Study Centre                                                 | Ivars Sliamnieis, Kaspars Megnis, Morna Ustinova, Jnis Plakovskis, Iklia Zrelavs, Vita Povse, Stelja Lapija, Jana Ose, Marta Priedte, Uga Dumpis, Jnis Klovš                                                                                                                                                |
| EPI_ISL_770050, EPI_ISL_770053                                                                                                                                                                                                                                                                                                                                                                                                                                                                                                                                                                                                                 | Centri Laboratoria                                                                            | Latvian Biomedical Research and Study Centre                                                 | Ivars Sliamnieis, Kaspars Megnis, Morna Ustinova, Jnis Plakovskis, Iklia Zrelavs, Vita Povse, Stelja Lapija, Jana Ose, Marta Priedte, Uga Dumpis, Jnis Klovš                                                                                                                                                |
| EPI_ISL_770514                                                                                                                                                                                                                                                                                                                                                                                                                                                                                                                                                                                                                                 | Lithuanian University of Health Sciences Hospital, Department of Laboratory Medicine          | Lithuanian University of Health Sciences, Molecular cardiology lab.                          | Lukas Zernatis, Ingrida Olerdrat, Arnoldas Paulientis, Kamile Tamusauskaitė, Dovydas Geceys, Laura Pareckaitė, Vaiva Lesauskaitė, Astra Vikauskienė                                                                                                                                                         |
| EPI_ISL_770688, EPI_ISL_770689, EPI_ISL_770699, EPI_ISL_770739, EPI_ISL_770740, EPI_ISL_770746, EPI_ISL_770789                                                                                                                                                                                                                                                                                                                                                                                                                                                                                                                                 | ZOTZ KLI MAS MZV Dusseldorf-Centrum GbH UBAG für Labormedizin, Genetik, Zytologie, Pathologie | Center of Medical Microbiology, Virology and Hospital Hygiene, University of Dusseldorf      | Maximilian Damanagaz, Alexander Diltchev, Ashley-Jane Doljess, Patrick Finzer, Katrin Hofmann, Torsten Houwartz, Lisanna Hilse, Malte Kröns, Vasconcelos, Marek Kornecki, Nadine Lübbe, Jessica Nicolai, Klaus Pfeifer, Daniel Ströw, Jörg Trimm, Andreas Walker, Tobias Wernemann, Rainer Zoz              |
| EPI_ISL_770852, EPI_ISL_770856, EPI_ISL_770864, EPI_ISL_770866, EPI_ISL_770871, EPI_ISL_770872, EPI_ISL_770876, EPI_ISL_770914, EPI_ISL_770931, EPI_ISL_770943, EPI_ISL_770947, EPI_ISL_770957, EPI_ISL_770961, EPI_ISL_770978, EPI_ISL_770993, EPI_ISL_771013, EPI_ISL_771014, EPI_ISL_771017, EPI_ISL_771072, EPI_ISL_771079, EPI_ISL_771087, EPI_ISL_771093, EPI_ISL_771101, EPI_ISL_771103, EPI_ISL_771105, EPI_ISL_771108, EPI_ISL_771109, EPI_ISL_771112, EPI_ISL_771121, EPI_ISL_771122, EPI_ISL_771124, EPI_ISL_771126, EPI_ISL_771128, EPI_ISL_771131, EPI_ISL_771132, EPI_ISL_771143, EPI_ISL_771145, EPI_ISL_771147, EPI_ISL_771148 | E. Gulbia Laboratorija<br>Centri Laboratoria                                                  | Latvian Biomedical Research and Study Centre<br>Latvian Biomedical Research and Study Centre | Ivars Sliamnieis, Kaspars Megnis, Morna Ustinova, Jnis Plakovskis, Iklia Zrelavs, Vita Povse, Mikus Gavars, Dmitrijs Parmirovs, Uga Dumpis, Jnis Klovš                                                                                                                                                      |

|                                                                                                                                                                                                                                                |                                                                                  |                                                                           |                                                                                                                                                                                                                                                                                                 |
|------------------------------------------------------------------------------------------------------------------------------------------------------------------------------------------------------------------------------------------------|----------------------------------------------------------------------------------|---------------------------------------------------------------------------|-------------------------------------------------------------------------------------------------------------------------------------------------------------------------------------------------------------------------------------------------------------------------------------------------|
| see above                                                                                                                                                                                                                                      | Laboratoire national de santé, Microbiology, Virology                            | Laboratoire national de santé, Microbiology, Microbial Genomics Platform  | Anke Wienecke-Baldacchino, Catherine Ragmbau, Jessica Trapp, Fauz Djabl, Use Pignon, Faouf Saimon, Tamir Abdelrahman                                                                                                                                                                            |
| EPI_ISL_775256                                                                                                                                                                                                                                 | Laboratoire Biologie                                                             | Laboratoire de Biotechnologie                                             | Mourat Ouadghiri, Tarik Aarniz, Mohammed Waïd Chemao Eihri, Mohamed Chemau, Hanae Dakka, Aïda Alaoui, Othmane Touzani, Amira Bernouda, Boucraa Belqunam, Larben belqunam, Saïd Amzaz, and Azeddine Ibrahim                                                                                      |
| EPI_ISL_775333                                                                                                                                                                                                                                 | Foerde Hospital, Department of Microbiology                                      | Norwegian Institute of Public Health, Department of Virology              | Kathrine Stene-Johansen, Kamilla Heddeland Insetjord, Hilde Eishaug, Aliva R AllMarie Paulsen Madsen, Rasmus Rils Kopperud, Hilde Volian, Karoline Bragstad, Olav Hungnes                                                                                                                       |
| EPI_ISL_775333, EPI_ISL_775354, EPI_ISL_775355                                                                                                                                                                                                 | Dept. of Medical Microbiology, Stavanger University Hospital, Helse Stavanger HF | Norwegian Institute of Public Health, Department of Virology              | Kathrine Stene-Johansen, Kamilla Heddeland Insetjord, Hilde Eishaug, Aliva R AllMarie Paulsen Madsen, Rasmus Rils Kopperud, Hilde Volian, Karoline Bragstad, Olav Hungnes                                                                                                                       |
| EPI_ISL_775386                                                                                                                                                                                                                                 | Dept. of Medical Microbiology, Stavanger University Hospital, Helse Stavanger HF | Norwegian Institute of Public Health, Department of Virology              | Kathrine Stene-Johansen, Kamilla Heddeland Insetjord, Hilde Eishaug, Aliva R AllMarie Paulsen Madsen, Rasmus Rils Kopperud, Hilde Volian, Karoline Bragstad, Olav Hungnes                                                                                                                       |
| EPI_ISL_775391, EPI_ISL_775413                                                                                                                                                                                                                 | Oslo University Hospital, Department of Medical Microbiology                     | Norwegian Institute of Public Health, Department of Virology              | Kathrine Stene-Johansen, Kamilla Heddeland Insetjord, Hilde Eishaug, Aliva R AllMarie Paulsen Madsen, Rasmus Rils Kopperud, Hilde Volian, Karoline Bragstad, Olav Hungnes                                                                                                                       |
| EPI_ISL_775443, EPI_ISL_775444                                                                                                                                                                                                                 | Norwegian Institute of Public Health, Department of Virology                     | Norwegian Institute of Public Health, Department of Virology              | Kathrine Stene-Johansen, Kamilla Heddeland Insetjord, Hilde Eishaug, Aliva R AllMarie Paulsen Madsen, Rasmus Rils Kopperud, Hilde Volian, Karoline Bragstad, Olav Hungnes                                                                                                                       |
| EPI_ISL_775457                                                                                                                                                                                                                                 | Oslo University Hospital, Department of Medical Microbiology                     | Norwegian Institute of Public Health, Department of Virology              | Kathrine Stene-Johansen, Kamilla Heddeland Insetjord, Hilde Eishaug, Aliva R AllMarie Paulsen Madsen, Rasmus Rils Kopperud, Hilde Volian, Karoline Bragstad, Olav Hungnes                                                                                                                       |
| EPI_ISL_775510, EPI_ISL_775511, EPI_ISL_775512, EPI_ISL_775513, EPI_ISL_775514, EPI_ISL_775515                                                                                                                                                 | Norwegian Institute of Public Health, Department of Virology                     | Norwegian Institute of Public Health, Department of Virology              | Kathrine Stene-Johansen, Kamilla Heddeland Insetjord, Hilde Eishaug, Aliva R AllMarie Paulsen Madsen, Rasmus Rils Kopperud, Hilde Volian, Karoline Bragstad, Olav Hungnes                                                                                                                       |
| EPI_ISL_775543, EPI_ISL_775545                                                                                                                                                                                                                 | Klinisk mikrobiologi, Viruslab                                                   | The Public Health Agency of Sweden                                        | Department of Microbiology, The Public Health Agency of Sweden                                                                                                                                                                                                                                  |
| EPI_ISL_775573                                                                                                                                                                                                                                 | Klinisk mikrobiologi                                                             | The Public Health Agency of Sweden                                        | Department of Microbiology, The Public Health Agency of Sweden                                                                                                                                                                                                                                  |
| EPI_ISL_775580                                                                                                                                                                                                                                 | ABC                                                                              | The Public Health Agency of Sweden                                        | Department of Microbiology, The Public Health Agency of Sweden                                                                                                                                                                                                                                  |
| EPI_ISL_775588                                                                                                                                                                                                                                 | Klinisk mikrobiologi                                                             | The Public Health Agency of Sweden                                        | Department of Microbiology, The Public Health Agency of Sweden                                                                                                                                                                                                                                  |
| EPI_ISL_776838                                                                                                                                                                                                                                 | Israel Central Virology laboratory                                               | Israel Central Virology laboratory                                        | Neta Zuckerman, Erit Dahan Bucris, Oran Erster, Michal Mandelblum, Orna Mor, Elia Wendenelson                                                                                                                                                                                                   |
| EPI_ISL_776886, EPI_ISL_776892, EPI_ISL_776914, EPI_ISL_776916, EPI_ISL_776917, EPI_ISL_776925, EPI_ISL_776927, EPI_ISL_776929, EPI_ISL_776941, EPI_ISL_776950, EPI_ISL_776962, EPI_ISL_776963, EPI_ISL_776964, EPI_ISL_776965, EPI_ISL_776966 | Israel Zooprofilattico Sperimentale del Mezzogiorno                              | TTGEM                                                                     | Antonio Gimaldi, Patrizia Annunziata, Francesco Panarello, Biancamaria Perri, Valentina Bouche, Chiara Corbellano, Maria Concetta Cuomo, Denise Di Conchilo, Lucio Di Filippo, Anna Manfredi, Marcello Salvi, Antonino Limone, Pellegrino Cerro, Andrea Balabio, Davide Cacchiarilli            |
| see above                                                                                                                                                                                                                                      | see above                                                                        | see above                                                                 | see above                                                                                                                                                                                                                                                                                       |
| EPI_ISL_777020                                                                                                                                                                                                                                 | Lighthouse Lab in Alderley Park                                                  | Welcome Sanger Institute for the COVID-19 Genomics UK (COG-UK) Consortium | Jacquelyn Wynn, Mairead Hyland, The Lighthouse Lab in Alderley Park and Alex Alderton, Roberto Amato, Sonia Goncalves, Ewan Harrison, David K Jackson, Ian Johnston, Dominic Kwiatkowski, Cordelia Langford, John Sillito on behalf of the Wellcome Sanger Institute COVID-19 Surveillance Team |
| EPI_ISL_777021                                                                                                                                                                                                                                 | Lighthouse Lab in Glasgow                                                        | Welcome Sanger Institute for the COVID-19 Genomics UK (COG-UK) Consortium | Jacquelyn Wynn, Mairead Hyland, The Lighthouse Lab in Glasgow and Alex Alderton, Roberto Amato, Sonia Goncalves, Ewan Harrison, David K Jackson, Ian Johnston, Dominic Kwiatkowski, Cordelia Langford, John Sillito on behalf of the Wellcome Sanger Institute COVID-19 Surveillance Team       |
| see above                                                                                                                                                                                                                                      | see above                                                                        | see above                                                                 | see above                                                                                                                                                                                                                                                                                       |
| EPI_ISL_777024, EPI_ISL_777032, EPI_ISL_777043, EPI_ISL_777044, EPI_ISL_777046, EPI_ISL_777049, EPI_ISL_777052, EPI_ISL_777053, EPI_ISL_777054, EPI_ISL_777060, EPI_ISL_777071, EPI_ISL_777072, EPI_ISL_777077, EPI_ISL_777078, EPI_ISL_777079 | Lighthouse Lab in Alderley Park                                                  | Welcome Sanger Institute for the COVID-19 Genomics UK (COG-UK) Consortium | Jacquelyn Wynn, Mairead Hyland, The Lighthouse Lab in Alderley Park and Alex Alderton, Roberto Amato, Sonia Goncalves, Ewan Harrison, David K Jackson, Ian Johnston, Dominic Kwiatkowski, Cordelia Langford, John Sillito on behalf of the Wellcome Sanger Institute COVID-19 Surveillance Team |
| EPI_ISL_777082, EPI_ISL_777089                                                                                                                                                                                                                 | Lighthouse Lab in Glasgow                                                        | Welcome Sanger Institute for the COVID-19 Genomics UK (COG-UK) Consortium | Jacquelyn Wynn, Mairead Hyland, The Lighthouse Lab in Glasgow and Alex Alderton, Roberto Amato, Sonia Goncalves, Ewan Harrison, David K Jackson, Ian Johnston, Dominic Kwiatkowski, Cordelia Langford, John Sillito on behalf of the Wellcome Sanger Institute COVID-19 Surveillance Team       |
| EPI_ISL_777153                                                                                                                                                                                                                                 | Lighthouse Lab in Alderley Park                                                  | Welcome Sanger Institute for the COVID-19 Genomics UK (COG-UK) Consortium | Jacquelyn Wynn, Mairead Hyland, The Lighthouse Lab in Alderley Park and Alex Alderton, Roberto Amato, Sonia Goncalves, Ewan Harrison, David K Jackson, Ian Johnston, Dominic Kwiatkowski, Cordelia Langford, John Sillito on behalf of the Wellcome Sanger Institute COVID-19 Surveillance Team |
| EPI_ISL_777154                                                                                                                                                                                                                                 | Lighthouse Lab in Glasgow                                                        | Welcome Sanger Institute for the COVID-19 Genomics UK (COG-UK) Consortium | Jacquelyn Wynn, Mairead Hyland, The Lighthouse Lab in Glasgow and Alex Alderton, Roberto Amato, Sonia Goncalves, Ewan Harrison, David K Jackson, Ian Johnston, Dominic Kwiatkowski, Cordelia Langford, John Sillito on behalf of the Wellcome Sanger Institute COVID-19 Surveillance Team       |
| EPI_ISL_777155                                                                                                                                                                                                                                 | Lighthouse Lab in Alderley Park                                                  | Welcome Sanger Institute for the COVID-19 Genomics UK (COG-UK) Consortium | Jacquelyn Wynn, Mairead Hyland, The Lighthouse Lab in Alderley Park and Alex Alderton, Roberto Amato, Sonia Goncalves, Ewan Harrison, David K Jackson, Ian Johnston, Dominic Kwiatkowski, Cordelia Langford, John Sillito on behalf of the Wellcome Sanger Institute COVID-19 Surveillance Team |
| EPI_ISL_777158                                                                                                                                                                                                                                 | Lighthouse Lab in Milton Keynes                                                  | Welcome Sanger Institute for the COVID-19 Genomics UK (COG-UK) Consortium | Jacquelyn Wynn, Mairead Hyland, The Lighthouse Lab in Alderley Park and Alex Alderton, Roberto Amato, Sonia Goncalves, Ewan Harrison, David K Jackson, Ian Johnston, Dominic Kwiatkowski, Cordelia Langford, John Sillito on behalf of the Wellcome Sanger Institute COVID-19 Surveillance Team |
| EPI_ISL_777163, EPI_ISL_777167, EPI_ISL_777170, EPI_ISL_777182, EPI_ISL_777192, EPI_ISL_777196                                                                                                                                                 | Lighthouse Lab in Alderley Park                                                  | Welcome Sanger Institute for the COVID-19 Genomics UK (COG-UK) Consortium | Jacquelyn Wynn, Mairead Hyland, The Lighthouse Lab in Alderley Park and Alex Alderton, Roberto Amato, Sonia Goncalves, Ewan Harrison, David K Jackson, Ian Johnston, Dominic Kwiatkowski, Cordelia Langford, John Sillito on behalf of the Wellcome Sanger Institute COVID-19 Surveillance Team |
| EPI_ISL_777199                                                                                                                                                                                                                                 | Lighthouse Lab in Alderley Park                                                  | Welcome Sanger Institute for the COVID-19 Genomics UK (COG-UK) Consortium | Jacquelyn Wynn, Mairead Hyland, The Lighthouse Lab in Alderley Park and Alex Alderton, Roberto Amato, Sonia Goncalves, Ewan Harrison, David K Jackson, Ian Johnston, Dominic Kwiatkowski, Cordelia Langford, John Sillito on behalf of the Wellcome Sanger Institute COVID-19 Surveillance Team |
| EPI_ISL_777215                                                                                                                                                                                                                                 | Lighthouse Lab in Glasgow                                                        | Welcome Sanger Institute for the COVID-19 Genomics UK (COG-UK) Consortium | Jacquelyn Wynn, Mairead Hyland, The Lighthouse Lab in Glasgow and Alex Alderton, Roberto Amato, Sonia Goncalves, Ewan Harrison, David K Jackson, Ian Johnston, Dominic Kwiatkowski, Cordelia Langford, John Sillito on behalf of the Wellcome Sanger Institute COVID-19 Surveillance Team       |
| EPI_ISL_777217                                                                                                                                                                                                                                 | Lighthouse Lab in Alderley Park                                                  | Welcome Sanger Institute for the COVID-19 Genomics UK (COG-UK) Consortium | Jacquelyn Wynn, Mairead Hyland, The Lighthouse Lab in Alderley Park and Alex Alderton, Roberto Amato, Sonia Goncalves, Ewan Harrison, David K Jackson, Ian Johnston, Dominic Kwiatkowski, Cordelia Langford, John Sillito on behalf of the Wellcome Sanger Institute COVID-19 Surveillance Team |
| EPI_ISL_777219, EPI_ISL_777223                                                                                                                                                                                                                 | Lighthouse Lab in Glasgow                                                        | Welcome Sanger Institute for the COVID-19 Genomics UK (COG-UK) Consortium | Jacquelyn Wynn, Mairead Hyland, The Lighthouse Lab in Glasgow and Alex Alderton, Roberto Amato, Sonia Goncalves, Ewan Harrison, David K Jackson, Ian Johnston, Dominic Kwiatkowski, Cordelia Langford, John Sillito on behalf of the Wellcome Sanger Institute COVID-19 Surveillance Team       |
| EPI_ISL_777228, EPI_ISL_777240                                                                                                                                                                                                                 | Lighthouse Lab in Alderley Park                                                  | Welcome Sanger Institute for the COVID-19 Genomics UK (COG-UK) Consortium | Jacquelyn Wynn, Mairead Hyland, The Lighthouse Lab in Alderley Park and Alex Alderton, Roberto Amato, Sonia Goncalves, Ewan Harrison, David K                                                                                                                                                   |









|                                                                                                                                                                                |                                                                                                                                                    |                                                                                                                            |                                                                                                                                                                                                                                                                                                                                                                                                                                         |
|--------------------------------------------------------------------------------------------------------------------------------------------------------------------------------|----------------------------------------------------------------------------------------------------------------------------------------------------|----------------------------------------------------------------------------------------------------------------------------|-----------------------------------------------------------------------------------------------------------------------------------------------------------------------------------------------------------------------------------------------------------------------------------------------------------------------------------------------------------------------------------------------------------------------------------------|
| EP1_ISL_778410                                                                                                                                                                 | Lighthouse Lab in Alderley Park                                                                                                                    | Wellcome Sanger Institute for the COVID-19 Genomics UK (COG-UK) Consortium                                                 | Jacquelyn Wynn, Mairead Hyland, The Lighthouse Lab in Alderley Park and Alex Alderton, Roberto Amato, Sonia Goncalves, Ewan Harrison, David K Jackson, Ian Johnston, Dominic Kwiatkowski, Cordelia Langford, John Sillitoe on behalf of the Wellcome Sanger Institute COVID-19 Surveillance Team                                                                                                                                        |
| EP1_ISL_778414                                                                                                                                                                 | Lighthouse Lab in Milton Keynes                                                                                                                    | Wellcome Sanger Institute for the COVID-19 Genomics UK (COG-UK) Consortium                                                 | The Lighthouse Lab in Milton Keynes and Alex Alderton, Roberto Amato, Sonia Goncalves, Ewan Harrison, David K Jackson, Ian Johnston, Dominic Kwiatkowski, Cordelia Langford, John Sillitoe on behalf of the Wellcome Sanger Institute COVID-19 Surveillance Team                                                                                                                                                                        |
| EP1_ISL_778423                                                                                                                                                                 | Lighthouse Lab in Glasgow                                                                                                                          | Wellcome Sanger Institute for the COVID-19 Genomics UK (COG-UK) Consortium                                                 | Harper VanSteenhouse, Yurni Kasai, David Gray, Carol Clugston, Anna Dominiczak and Alex Alderton, Roberto Amato, Sonia Goncalves, Ewan Harrison, David K Jackson, Ian Johnston, Dominic Kwiatkowski, Cordelia Langford, John Sillitoe on behalf of the Wellcome Sanger Institute COVID-19 Surveillance Team                                                                                                                             |
| EP1_ISL_778425, EP1_ISL_778429                                                                                                                                                 | Lighthouse Lab in Milton Keynes                                                                                                                    | Wellcome Sanger Institute for the COVID-19 Genomics UK (COG-UK) Consortium                                                 | The Lighthouse Lab in Milton Keynes and Alex Alderton, Roberto Amato, Sonia Goncalves, Ewan Harrison, David K Jackson, Ian Johnston, Dominic Kwiatkowski, Cordelia Langford, John Sillitoe on behalf of the Wellcome Sanger Institute COVID-19 Surveillance Team                                                                                                                                                                        |
| EP1_ISL_778432                                                                                                                                                                 | Lighthouse Lab in Alderley Park                                                                                                                    | Wellcome Sanger Institute for the COVID-19 Genomics UK (COG-UK) Consortium                                                 | Jacquelyn Wynn, Mairead Hyland, The Lighthouse Lab in Alderley Park and Alex Alderton, Roberto Amato, Sonia Goncalves, Ewan Harrison, David K Jackson, Ian Johnston, Dominic Kwiatkowski, Cordelia Langford, John Sillitoe on behalf of the Wellcome Sanger Institute COVID-19 Surveillance Team                                                                                                                                        |
| EP1_ISL_778437, EP1_ISL_778452                                                                                                                                                 | Lighthouse Lab in Milton Keynes                                                                                                                    | Wellcome Sanger Institute for the COVID-19 Genomics UK (COG-UK) Consortium                                                 | The Lighthouse Lab in Milton Keynes and Alex Alderton, Roberto Amato, Sonia Goncalves, Ewan Harrison, David K Jackson, Ian Johnston, Dominic Kwiatkowski, Cordelia Langford, John Sillitoe on behalf of the Wellcome Sanger Institute COVID-19 Surveillance Team                                                                                                                                                                        |
| EP1_ISL_778459, EP1_ISL_778465                                                                                                                                                 | Lighthouse Lab in Glasgow                                                                                                                          | Wellcome Sanger Institute for the COVID-19 Genomics UK (COG-UK) Consortium                                                 | Harper VanSteenhouse, Yurni Kasai, David Gray, Carol Clugston, Anna Dominiczak and Alex Alderton, Roberto Amato, Sonia Goncalves, Ewan Harrison, David K Jackson, Ian Johnston, Dominic Kwiatkowski, Cordelia Langford, John Sillitoe on behalf of the Wellcome Sanger Institute COVID-19 Surveillance Team                                                                                                                             |
| EP1_ISL_778474                                                                                                                                                                 | Lighthouse Lab in Milton Keynes                                                                                                                    | Wellcome Sanger Institute for the COVID-19 Genomics UK (COG-UK) Consortium                                                 | The Lighthouse Lab in Milton Keynes and Alex Alderton, Roberto Amato, Sonia Goncalves, Ewan Harrison, David K Jackson, Ian Johnston, Dominic Kwiatkowski, Cordelia Langford, John Sillitoe on behalf of the Wellcome Sanger Institute COVID-19 Surveillance Team                                                                                                                                                                        |
| EP1_ISL_778482                                                                                                                                                                 | Lighthouse Lab in Glasgow                                                                                                                          | Wellcome Sanger Institute for the COVID-19 Genomics UK (COG-UK) Consortium                                                 | Harper VanSteenhouse, Yurni Kasai, David Gray, Carol Clugston, Anna Dominiczak and Alex Alderton, Roberto Amato, Sonia Goncalves, Ewan Harrison, David K Jackson, Ian Johnston, Dominic Kwiatkowski, Cordelia Langford, John Sillitoe on behalf of the Wellcome Sanger Institute COVID-19 Surveillance Team                                                                                                                             |
| EP1_ISL_778493                                                                                                                                                                 | Lighthouse Lab in Milton Keynes                                                                                                                    | Wellcome Sanger Institute for the COVID-19 Genomics UK (COG-UK) Consortium                                                 | The Lighthouse Lab in Milton Keynes and Alex Alderton, Roberto Amato, Sonia Goncalves, Ewan Harrison, David K Jackson, Ian Johnston, Dominic Kwiatkowski, Cordelia Langford, John Sillitoe on behalf of the Wellcome Sanger Institute COVID-19 Surveillance Team                                                                                                                                                                        |
| EP1_ISL_778497                                                                                                                                                                 | Lighthouse Lab in Glasgow                                                                                                                          | Wellcome Sanger Institute for the COVID-19 Genomics UK (COG-UK) Consortium                                                 | Harper VanSteenhouse, Yurni Kasai, David Gray, Carol Clugston, Anna Dominiczak and Alex Alderton, Roberto Amato, Sonia Goncalves, Ewan Harrison, David K Jackson, Ian Johnston, Dominic Kwiatkowski, Cordelia Langford, John Sillitoe on behalf of the Wellcome Sanger Institute COVID-19 Surveillance Team                                                                                                                             |
| EP1_ISL_778498                                                                                                                                                                 | Lighthouse Lab in Milton Keynes                                                                                                                    | Wellcome Sanger Institute for the COVID-19 Genomics UK (COG-UK) Consortium                                                 | The Lighthouse Lab in Milton Keynes and Alex Alderton, Roberto Amato, Sonia Goncalves, Ewan Harrison, David K Jackson, Ian Johnston, Dominic Kwiatkowski, Cordelia Langford, John Sillitoe on behalf of the Wellcome Sanger Institute COVID-19 Surveillance Team                                                                                                                                                                        |
| EP1_ISL_778504                                                                                                                                                                 | Lighthouse Lab in Glasgow                                                                                                                          | Wellcome Sanger Institute for the COVID-19 Genomics UK (COG-UK) Consortium                                                 | Harper VanSteenhouse, Yurni Kasai, David Gray, Carol Clugston, Anna Dominiczak and Alex Alderton, Roberto Amato, Sonia Goncalves, Ewan Harrison, David K Jackson, Ian Johnston, Dominic Kwiatkowski, Cordelia Langford, John Sillitoe on behalf of the Wellcome Sanger Institute COVID-19 Surveillance Team                                                                                                                             |
| EP1_ISL_778510, EP1_ISL_778519                                                                                                                                                 | Lighthouse Lab in Alderley Park                                                                                                                    | Wellcome Sanger Institute for the COVID-19 Genomics UK (COG-UK) Consortium                                                 | Jacquelyn Wynn, Mairead Hyland, The Lighthouse Lab in Alderley Park and Alex Alderton, Roberto Amato, Sonia Goncalves, Ewan Harrison, David K Jackson, Ian Johnston, Dominic Kwiatkowski, Cordelia Langford, John Sillitoe on behalf of the Wellcome Sanger Institute COVID-19 Surveillance Team                                                                                                                                        |
| EP1_ISL_778527                                                                                                                                                                 | Lighthouse Lab in Glasgow                                                                                                                          | Wellcome Sanger Institute for the COVID-19 Genomics UK (COG-UK) Consortium                                                 | Harper VanSteenhouse, Yurni Kasai, David Gray, Carol Clugston, Anna Dominiczak and Alex Alderton, Roberto Amato, Sonia Goncalves, Ewan Harrison, David K Jackson, Ian Johnston, Dominic Kwiatkowski, Cordelia Langford, John Sillitoe on behalf of the Wellcome Sanger Institute COVID-19 Surveillance Team                                                                                                                             |
| EP1_ISL_778528                                                                                                                                                                 | Lighthouse Lab in Alderley Park                                                                                                                    | Wellcome Sanger Institute for the COVID-19 Genomics UK (COG-UK) Consortium                                                 | Jacquelyn Wynn, Mairead Hyland, The Lighthouse Lab in Alderley Park and Alex Alderton, Roberto Amato, Sonia Goncalves, Ewan Harrison, David K Jackson, Ian Johnston, Dominic Kwiatkowski, Cordelia Langford, John Sillitoe on behalf of the Wellcome Sanger Institute COVID-19 Surveillance Team                                                                                                                                        |
| EP1_ISL_778535, EP1_ISL_778538                                                                                                                                                 | Lighthouse Lab in Milton Keynes                                                                                                                    | Wellcome Sanger Institute for the COVID-19 Genomics UK (COG-UK) Consortium                                                 | The Lighthouse Lab in Milton Keynes and Alex Alderton, Roberto Amato, Sonia Goncalves, Ewan Harrison, David K Jackson, Ian Johnston, Dominic Kwiatkowski, Cordelia Langford, John Sillitoe on behalf of the Wellcome Sanger Institute COVID-19 Surveillance Team                                                                                                                                                                        |
| EP1_ISL_778543, EP1_ISL_778556, EP1_ISL_778569                                                                                                                                 | Lighthouse Lab in Alderley Park                                                                                                                    | Wellcome Sanger Institute for the COVID-19 Genomics UK (COG-UK) Consortium                                                 | Jacquelyn Wynn, Mairead Hyland, The Lighthouse Lab in Alderley Park and Alex Alderton, Roberto Amato, Sonia Goncalves, Ewan Harrison, David K Jackson, Ian Johnston, Dominic Kwiatkowski, Cordelia Langford, John Sillitoe on behalf of the Wellcome Sanger Institute COVID-19 Surveillance Team                                                                                                                                        |
| EP1_ISL_778583                                                                                                                                                                 | Lighthouse Lab in Milton Keynes                                                                                                                    | Wellcome Sanger Institute for the COVID-19 Genomics UK (COG-UK) Consortium                                                 | The Lighthouse Lab in Milton Keynes and Alex Alderton, Roberto Amato, Sonia Goncalves, Ewan Harrison, David K Jackson, Ian Johnston, Dominic Kwiatkowski, Cordelia Langford, John Sillitoe on behalf of the Wellcome Sanger Institute COVID-19 Surveillance Team                                                                                                                                                                        |
| EP1_ISL_778593                                                                                                                                                                 | Lighthouse Lab in Alderley Park                                                                                                                    | Wellcome Sanger Institute for the COVID-19 Genomics UK (COG-UK) Consortium                                                 | Jacquelyn Wynn, Mairead Hyland, The Lighthouse Lab in Alderley Park and Alex Alderton, Roberto Amato, Sonia Goncalves, Ewan Harrison, David K Jackson, Ian Johnston, Dominic Kwiatkowski, Cordelia Langford, John Sillitoe on behalf of the Wellcome Sanger Institute COVID-19 Surveillance Team                                                                                                                                        |
| EP1_ISL_778595, EP1_ISL_778611                                                                                                                                                 | Lighthouse Lab in Milton Keynes                                                                                                                    | Wellcome Sanger Institute for the COVID-19 Genomics UK (COG-UK) Consortium                                                 | The Lighthouse Lab in Milton Keynes and Alex Alderton, Roberto Amato, Sonia Goncalves, Ewan Harrison, David K Jackson, Ian Johnston, Dominic Kwiatkowski, Cordelia Langford, John Sillitoe on behalf of the Wellcome Sanger Institute COVID-19 Surveillance Team                                                                                                                                                                        |
| EP1_ISL_778630                                                                                                                                                                 | Lighthouse Lab in Alderley Park                                                                                                                    | Wellcome Sanger Institute for the COVID-19 Genomics UK (COG-UK) Consortium                                                 | Jacquelyn Wynn, Mairead Hyland, The Lighthouse Lab in Alderley Park and Alex Alderton, Roberto Amato, Sonia Goncalves, Ewan Harrison, David K Jackson, Ian Johnston, Dominic Kwiatkowski, Cordelia Langford, John Sillitoe on behalf of the Wellcome Sanger Institute COVID-19 Surveillance Team                                                                                                                                        |
| EP1_ISL_778641                                                                                                                                                                 | Lighthouse Lab in Milton Keynes                                                                                                                    | Wellcome Sanger Institute for the COVID-19 Genomics UK (COG-UK) Consortium                                                 | The Lighthouse Lab in Milton Keynes and Alex Alderton, Roberto Amato, Sonia Goncalves, Ewan Harrison, David K Jackson, Ian Johnston, Dominic Kwiatkowski, Cordelia Langford, John Sillitoe on behalf of the Wellcome Sanger Institute COVID-19 Surveillance Team                                                                                                                                                                        |
| EP1_ISL_778691, EP1_ISL_778692, EP1_ISL_778693, EP1_ISL_778694, EP1_ISL_778822, EP1_ISL_778825, EP1_ISL_778826, EP1_ISL_778827, EP1_ISL_778830                                 | Istituto Zooprofilattico Sperimentale del Mezzogiorno                                                                                              | Irish Coronavirus Sequencing Consortium-Teagasc, Grange                                                                    | Antonio Girmaldi, Patrizia Annunziata, Francesco Parronchi, Bianca Maria Pieri, Valerina Bourque, Chiara Colarantonio, Maria Concetta Cuomo, Denise Di Conchi, Luca Di Filippo, Anna Marchetti, Marcello Sisti, Antonino Limone, Feligiano Centro, Andrea Dalabao, Davide Cacchiarelli, Matthew McCabe, Alejandro Abner Garcia Leon, Fiona Crispe, Calum Walsh, Michael Carr, John Kenny, Paul Cotter, Patrick Mallon, Gabriel Gonzalez |
| EP1_ISL_778860                                                                                                                                                                 | AID                                                                                                                                                | TIGEM                                                                                                                      |                                                                                                                                                                                                                                                                                                                                                                                                                                         |
| EP1_ISL_779404, EP1_ISL_779406                                                                                                                                                 | Laboratory of Infectious Diseases, Department of Biomedical and Clinical Sciences L. Sacco, University of Milan<br>Royal Darwin Hospital Pathology | Laboratory of Infectious Diseases, Department of Biomedical and Clinical Sciences L. Sacco, University of Milan<br>MDU-PHL | Alessia Lai, Amalisa Bergina, Carla Della Ventura, Claudia Baidia, Massimo Galli, Gianluigino Zambender on behalf of SARS-CoV-2 ITALIAN RESFACH ENITERPRISE-(SCHE) Collaborative Group<br>Meumann E., Cay L., Seemann T., Sait, M.L., Duce J., Sherry, N.L.                                                                                                                                                                             |
| EP1_ISL_779732, EP1_ISL_779733, EP1_ISL_779736, EP1_ISL_779740, EP1_ISL_779753, EP1_ISL_779774, EP1_ISL_779775, EP1_ISL_779776, EP1_ISL_779777, EP1_ISL_779778, EP1_ISL_779779 | Servicio de Microbiología, Hospital Miguel Servet, Zaragoza<br>CNR Virus des Infections Respiratoires - France SUD                                 | SeqCOVID-SPAIN consortium/IBV(SISC)<br>CNR Virus des Infections Respiratoires - France SUD                                 | Antonio Rezsia Lopez, Alexander Triastanjo Baro, Ana Miango, Ydiana Garcia Gratiolup, Nieves Martinez Cameo and SeqCOVID-SPAIN consortium<br>Antonin Bal, Gregory Destras, Gwendolyne Burfin, Hadrien Régué, Quentin Semanas, Martine Valette, Bruno Lina, Laurence Jossel                                                                                                                                                              |
| EP1_ISL_779792, EP1_ISL_779794, EP1_ISL_779803, EP1_ISL_779805, EP1_ISL_779807                                                                                                 | CNR Virus des Infections Respiratoires - France SUD                                                                                                | CNR Virus des Infections Respiratoires - France SUD                                                                        | Antonin Bal, Gregory Destras, Gwendolyne Burfin, Hadrien Régué, Quentin Semanas, Martine Valette, Bruno Lina, Laurence Jossel                                                                                                                                                                                                                                                                                                           |
| EP1_ISL_779818, EP1_ISL_779819, EP1_ISL_779823, EP1_ISL_779825, EP1_ISL_779828                                                                                                 | Laboratoire de virologie, CHU de Grenoble                                                                                                          | CNR Virus des Infections Respiratoires - France SUD                                                                        | Antonin Bal, Gregory Destras, Gwendolyne Burfin, Hadrien Régué, Quentin Semanas, Martine Valette, Bruno Lina, Sylvie Larat, Laurence Jossel                                                                                                                                                                                                                                                                                             |
| EP1_ISL_779838, EP1_ISL_779839, EP1_ISL_779840, EP1_ISL_779841, EP1_ISL_779842                                                                                                 | CHU Bordeaux                                                                                                                                       | CNR Virus des Infections Respiratoires - France SUD                                                                        | Antonin Bal, Gregory Destras, Gwendolyne Burfin, Hadrien Régué, Quentin Semanas, Martine Valette, Bruno Lina, Pamkka Bellecave, Camille Ciccone, Isabelle Garrigue, Marie-Edith Laton, Pascale Timoulet, Laurence Jossel                                                                                                                                                                                                                |

|                                                                                                                                                                                                                                                                                                                                                                                                                                                                                                                                                                                                                                                                                                                                                                                                                                                                                                                                                                                                                                                                                                                                                                                                                                                                                                                                                                                                                                                                                                                                                                                                                                                                                                                                                                                                                                                                                                                                                                                                                                                                                                                                                                                                                                                                                                                                                                                                                                                                                                                                                                                                                                                                                                                                                                                                                                                                                                                                                                                                                                                                                                                                                                                                                                                                                                                                                                                                                                                                                                                                                                                                |                                                                                               |                                                                                          |                                                                                                                                                                                                                                                                                                   |
|------------------------------------------------------------------------------------------------------------------------------------------------------------------------------------------------------------------------------------------------------------------------------------------------------------------------------------------------------------------------------------------------------------------------------------------------------------------------------------------------------------------------------------------------------------------------------------------------------------------------------------------------------------------------------------------------------------------------------------------------------------------------------------------------------------------------------------------------------------------------------------------------------------------------------------------------------------------------------------------------------------------------------------------------------------------------------------------------------------------------------------------------------------------------------------------------------------------------------------------------------------------------------------------------------------------------------------------------------------------------------------------------------------------------------------------------------------------------------------------------------------------------------------------------------------------------------------------------------------------------------------------------------------------------------------------------------------------------------------------------------------------------------------------------------------------------------------------------------------------------------------------------------------------------------------------------------------------------------------------------------------------------------------------------------------------------------------------------------------------------------------------------------------------------------------------------------------------------------------------------------------------------------------------------------------------------------------------------------------------------------------------------------------------------------------------------------------------------------------------------------------------------------------------------------------------------------------------------------------------------------------------------------------------------------------------------------------------------------------------------------------------------------------------------------------------------------------------------------------------------------------------------------------------------------------------------------------------------------------------------------------------------------------------------------------------------------------------------------------------------------------------------------------------------------------------------------------------------------------------------------------------------------------------------------------------------------------------------------------------------------------------------------------------------------------------------------------------------------------------------------------------------------------------------------------------------------------------------|-----------------------------------------------------------------------------------------------|------------------------------------------------------------------------------------------|---------------------------------------------------------------------------------------------------------------------------------------------------------------------------------------------------------------------------------------------------------------------------------------------------|
| EP1_ISL_779845                                                                                                                                                                                                                                                                                                                                                                                                                                                                                                                                                                                                                                                                                                                                                                                                                                                                                                                                                                                                                                                                                                                                                                                                                                                                                                                                                                                                                                                                                                                                                                                                                                                                                                                                                                                                                                                                                                                                                                                                                                                                                                                                                                                                                                                                                                                                                                                                                                                                                                                                                                                                                                                                                                                                                                                                                                                                                                                                                                                                                                                                                                                                                                                                                                                                                                                                                                                                                                                                                                                                                                                 | CNR Virus des Infections Respiratoires - France SUD                                           | CNR Virus des Infections Respiratoires - France SUD                                      | Antonin Bal, Gregory Desrues, Gwendoline Burfin, Hadrrien Regue, Quentin Semarac, Marine Valette, Bruno Lina, Laurence Jossel                                                                                                                                                                     |
| EP1_ISL_779851, EP1_ISL_779852, EP1_ISL_779854, EP1_ISL_779855, EP1_ISL_779857, EP1_ISL_779859, EP1_ISL_779860, EP1_ISL_779861, EP1_ISL_779862, EP1_ISL_779863, EP1_ISL_779864, EP1_ISL_779873, EP1_ISL_779874, EP1_ISL_779875, EP1_ISL_779876, EP1_ISL_779877, EP1_ISL_779878, EP1_ISL_779882, EP1_ISL_779887, EP1_ISL_779888, EP1_ISL_779892, EP1_ISL_779893, EP1_ISL_779894, EP1_ISL_779895, EP1_ISL_779896, EP1_ISL_779897, EP1_ISL_779898, EP1_ISL_779899, EP1_ISL_779901, EP1_ISL_779902, EP1_ISL_779905, EP1_ISL_779907, EP1_ISL_779910, EP1_ISL_779911, EP1_ISL_779912, EP1_ISL_779913, EP1_ISL_779914, EP1_ISL_779915, EP1_ISL_779916, EP1_ISL_779917, EP1_ISL_779918, EP1_ISL_779919, EP1_ISL_779920, EP1_ISL_779921, EP1_ISL_779922, EP1_ISL_779923, EP1_ISL_779924, EP1_ISL_779925, EP1_ISL_779926, EP1_ISL_779927, EP1_ISL_779928, EP1_ISL_779929, EP1_ISL_779930, EP1_ISL_779931, EP1_ISL_779932, EP1_ISL_779933, EP1_ISL_779934, EP1_ISL_779935, EP1_ISL_779936, EP1_ISL_779937, EP1_ISL_779938, EP1_ISL_779939, EP1_ISL_779940, EP1_ISL_779941, EP1_ISL_779942, EP1_ISL_779943, EP1_ISL_779944, EP1_ISL_779945, EP1_ISL_779946, EP1_ISL_779947, EP1_ISL_779948, EP1_ISL_779949, EP1_ISL_779950, EP1_ISL_779951, EP1_ISL_779952, EP1_ISL_779953, EP1_ISL_779954, EP1_ISL_779955, EP1_ISL_779956, EP1_ISL_779957, EP1_ISL_779958, EP1_ISL_779959, EP1_ISL_779960, EP1_ISL_779961, EP1_ISL_779962, EP1_ISL_779963, EP1_ISL_779964, EP1_ISL_779965, EP1_ISL_779966, EP1_ISL_779967, EP1_ISL_779968, EP1_ISL_779969, EP1_ISL_779970, EP1_ISL_779971, EP1_ISL_779972, EP1_ISL_779973, EP1_ISL_779974, EP1_ISL_779975, EP1_ISL_779976, EP1_ISL_779977, EP1_ISL_779978, EP1_ISL_779979, EP1_ISL_779980, EP1_ISL_779981, EP1_ISL_779982, EP1_ISL_779983, EP1_ISL_779984, EP1_ISL_779985, EP1_ISL_779986, EP1_ISL_779987, EP1_ISL_779988, EP1_ISL_779989, EP1_ISL_779990, EP1_ISL_779991, EP1_ISL_779992, EP1_ISL_779993, EP1_ISL_779994, EP1_ISL_779995, EP1_ISL_779996, EP1_ISL_779997, EP1_ISL_779998, EP1_ISL_779999, EP1_ISL_780000, EP1_ISL_780001, EP1_ISL_780002, EP1_ISL_780003, EP1_ISL_780004, EP1_ISL_780005, EP1_ISL_780006, EP1_ISL_780007, EP1_ISL_780008, EP1_ISL_780009, EP1_ISL_780010, EP1_ISL_780011, EP1_ISL_780012, EP1_ISL_780013, EP1_ISL_780014, EP1_ISL_780015, EP1_ISL_780016, EP1_ISL_780017, EP1_ISL_780018, EP1_ISL_780019, EP1_ISL_780020, EP1_ISL_780021, EP1_ISL_780022, EP1_ISL_780023, EP1_ISL_780024, EP1_ISL_780025, EP1_ISL_780026, EP1_ISL_780027, EP1_ISL_780028, EP1_ISL_780029, EP1_ISL_780030, EP1_ISL_780031, EP1_ISL_780032, EP1_ISL_780033, EP1_ISL_780034, EP1_ISL_780035, EP1_ISL_780036, EP1_ISL_780037, EP1_ISL_780038, EP1_ISL_780039, EP1_ISL_780040, EP1_ISL_780041, EP1_ISL_780042, EP1_ISL_780043, EP1_ISL_780044, EP1_ISL_780045, EP1_ISL_780046, EP1_ISL_780047, EP1_ISL_780048, EP1_ISL_780049, EP1_ISL_780050, EP1_ISL_780051, EP1_ISL_780052, EP1_ISL_780053, EP1_ISL_780054, EP1_ISL_780055, EP1_ISL_780056, EP1_ISL_780057, EP1_ISL_780058, EP1_ISL_780059, EP1_ISL_780060, EP1_ISL_780061, EP1_ISL_780062, EP1_ISL_780063, EP1_ISL_780064, EP1_ISL_780065, EP1_ISL_780066, EP1_ISL_780067, EP1_ISL_780068, EP1_ISL_780069, EP1_ISL_780070, EP1_ISL_780071, EP1_ISL_780072, EP1_ISL_780073, EP1_ISL_780074, EP1_ISL_780075, EP1_ISL_780076, EP1_ISL_780077, EP1_ISL_780078, EP1_ISL_780079, EP1_ISL_780080, EP1_ISL_780081, EP1_ISL_780082, EP1_ISL_780083, EP1_ISL_780084, EP1_ISL_780085, EP1_ISL_780086, EP1_ISL_780087, EP1_ISL_780088, EP1_ISL_780089, EP1_ISL_780090, EP1_ISL_780091, EP1_ISL_780092, EP1_ISL_780093 | Service de Microbiologia, Hospital Universitario San Espasao                                  | Center of Medical Microbiology, Virology, and Hospital Hygiene, University of Dusseldorf | Carla Lopez-Casaspe, Jordi Reina, Antonio Oliver and SeqCOVID-SPAIN consortium                                                                                                                                                                                                                    |
| EP1_ISL_779954                                                                                                                                                                                                                                                                                                                                                                                                                                                                                                                                                                                                                                                                                                                                                                                                                                                                                                                                                                                                                                                                                                                                                                                                                                                                                                                                                                                                                                                                                                                                                                                                                                                                                                                                                                                                                                                                                                                                                                                                                                                                                                                                                                                                                                                                                                                                                                                                                                                                                                                                                                                                                                                                                                                                                                                                                                                                                                                                                                                                                                                                                                                                                                                                                                                                                                                                                                                                                                                                                                                                                                                 | ZOTZ KLUMAS MZV Dusseldorf-Centrum GBH UBA.G für Labormedizin, Genetik, Zytologie, Pathologie | SeqCOVID-SPAIN consortium/IBV(CSIC)                                                      | Maximilian Damagrec, Alexander Diltjev, Ashley-Jane Dupressis, Patrick Finzer, Kathrin Hofmann, Torsten Houwarz, Usama Hilse, Malte Kohns                                                                                                                                                         |
| see above                                                                                                                                                                                                                                                                                                                                                                                                                                                                                                                                                                                                                                                                                                                                                                                                                                                                                                                                                                                                                                                                                                                                                                                                                                                                                                                                                                                                                                                                                                                                                                                                                                                                                                                                                                                                                                                                                                                                                                                                                                                                                                                                                                                                                                                                                                                                                                                                                                                                                                                                                                                                                                                                                                                                                                                                                                                                                                                                                                                                                                                                                                                                                                                                                                                                                                                                                                                                                                                                                                                                                                                      | Hospital General Universitario Gregorio Marañón                                               | SeqCOVID-SPAIN consortium/IBV(CSIC)                                                      | Vasconcelos, Mark Korenack, Nadine Lübke, Jessica Nicolai, Klaus Peifer, Daniel Strelow, Jörg Trimm, Andreas Walker, Tobias Wernemann, Rainer Zoz                                                                                                                                                 |
| EP1_ISL_780404, EP1_ISL_780405, EP1_ISL_780406                                                                                                                                                                                                                                                                                                                                                                                                                                                                                                                                                                                                                                                                                                                                                                                                                                                                                                                                                                                                                                                                                                                                                                                                                                                                                                                                                                                                                                                                                                                                                                                                                                                                                                                                                                                                                                                                                                                                                                                                                                                                                                                                                                                                                                                                                                                                                                                                                                                                                                                                                                                                                                                                                                                                                                                                                                                                                                                                                                                                                                                                                                                                                                                                                                                                                                                                                                                                                                                                                                                                                 | Bernarda Government Molecular Diagnostics Laboratory (MDL)                                    | Respiratory Virus Unit, National Infection Service, Public Health England                | Dario Garcia de Vedra, Laura Perez-Lago, Maria Herranz, Jon Stilla, Julia Suarez, Pilar Catalan, Patricia Muñoz and SeqCOVID-SPAIN consortium                                                                                                                                                     |
| EP1_ISL_780414, EP1_ISL_780415                                                                                                                                                                                                                                                                                                                                                                                                                                                                                                                                                                                                                                                                                                                                                                                                                                                                                                                                                                                                                                                                                                                                                                                                                                                                                                                                                                                                                                                                                                                                                                                                                                                                                                                                                                                                                                                                                                                                                                                                                                                                                                                                                                                                                                                                                                                                                                                                                                                                                                                                                                                                                                                                                                                                                                                                                                                                                                                                                                                                                                                                                                                                                                                                                                                                                                                                                                                                                                                                                                                                                                 | Hospital General Universitario Gregorio Marañón                                               | SeqCOVID-SPAIN consortium/IBV(CSIC)                                                      | PHE Covid Sequencing Team, Dr Carika Weidon (Bernmuda), Dr Ayoola Oyinloye (Bernmuda)                                                                                                                                                                                                             |
| EP1_ISL_781189                                                                                                                                                                                                                                                                                                                                                                                                                                                                                                                                                                                                                                                                                                                                                                                                                                                                                                                                                                                                                                                                                                                                                                                                                                                                                                                                                                                                                                                                                                                                                                                                                                                                                                                                                                                                                                                                                                                                                                                                                                                                                                                                                                                                                                                                                                                                                                                                                                                                                                                                                                                                                                                                                                                                                                                                                                                                                                                                                                                                                                                                                                                                                                                                                                                                                                                                                                                                                                                                                                                                                                                 | Lighthouse Lab in Cambridge                                                                   | Welcome Sanger Institute for the COVID-19 Genomics UK (COG-UK) Consortium                | Dario Garcia de Vedra, Laura Perez-Lago, Maria Herranz, Jon Stilla, Julia Suarez, Pilar Catalan, Patricia Muñoz and SeqCOVID-SPAIN consortium                                                                                                                                                     |
| EP1_ISL_781191                                                                                                                                                                                                                                                                                                                                                                                                                                                                                                                                                                                                                                                                                                                                                                                                                                                                                                                                                                                                                                                                                                                                                                                                                                                                                                                                                                                                                                                                                                                                                                                                                                                                                                                                                                                                                                                                                                                                                                                                                                                                                                                                                                                                                                                                                                                                                                                                                                                                                                                                                                                                                                                                                                                                                                                                                                                                                                                                                                                                                                                                                                                                                                                                                                                                                                                                                                                                                                                                                                                                                                                 | Lighthouse Lab in Milton Keynes                                                               | Welcome Sanger Institute for the COVID-19 Genomics UK (COG-UK) Consortium                | Rob Howes, The Lighthouse Lab in Cambridge and Alex Alderton, Roberto Amato, Sonia Goncalves, Ewan Harrison, David K. Jackson, Ian Johnston, Dominic Kwiatkowski, Cordelia Langford, John Sillitoe on behalf of the Wellcome Sanger Institute COVID-19 Surveillance Team                          |
| EP1_ISL_781194                                                                                                                                                                                                                                                                                                                                                                                                                                                                                                                                                                                                                                                                                                                                                                                                                                                                                                                                                                                                                                                                                                                                                                                                                                                                                                                                                                                                                                                                                                                                                                                                                                                                                                                                                                                                                                                                                                                                                                                                                                                                                                                                                                                                                                                                                                                                                                                                                                                                                                                                                                                                                                                                                                                                                                                                                                                                                                                                                                                                                                                                                                                                                                                                                                                                                                                                                                                                                                                                                                                                                                                 | Lighthouse Lab in Alderley Park                                                               | Welcome Sanger Institute for the COVID-19 Genomics UK (COG-UK) Consortium                | The Lighthouse Lab in Milton Keynes and Alex Alderton, Roberto Amato, Sonia Goncalves, Ewan Harrison, David K. Jackson, Ian Johnston, Dominic Kwiatkowski, Cordelia Langford, John Sillitoe on behalf of the Wellcome Sanger Institute COVID-19 Surveillance Team                                 |
| EP1_ISL_781200                                                                                                                                                                                                                                                                                                                                                                                                                                                                                                                                                                                                                                                                                                                                                                                                                                                                                                                                                                                                                                                                                                                                                                                                                                                                                                                                                                                                                                                                                                                                                                                                                                                                                                                                                                                                                                                                                                                                                                                                                                                                                                                                                                                                                                                                                                                                                                                                                                                                                                                                                                                                                                                                                                                                                                                                                                                                                                                                                                                                                                                                                                                                                                                                                                                                                                                                                                                                                                                                                                                                                                                 | Lighthouse Lab in Milton Keynes                                                               | Welcome Sanger Institute for the COVID-19 Genomics UK (COG-UK) Consortium                | The Lighthouse Lab in Milton Keynes and Alex Alderton, Roberto Amato, Sonia Goncalves, Ewan Harrison, David K. Jackson, Ian Johnston, Dominic Kwiatkowski, Cordelia Langford, John Sillitoe on behalf of the Wellcome Sanger Institute COVID-19 Surveillance Team                                 |
| EP1_ISL_781201, EP1_ISL_781202, EP1_ISL_781205, EP1_ISL_781214, EP1_ISL_781219                                                                                                                                                                                                                                                                                                                                                                                                                                                                                                                                                                                                                                                                                                                                                                                                                                                                                                                                                                                                                                                                                                                                                                                                                                                                                                                                                                                                                                                                                                                                                                                                                                                                                                                                                                                                                                                                                                                                                                                                                                                                                                                                                                                                                                                                                                                                                                                                                                                                                                                                                                                                                                                                                                                                                                                                                                                                                                                                                                                                                                                                                                                                                                                                                                                                                                                                                                                                                                                                                                                 | Lighthouse Lab in Alderley Park                                                               | Welcome Sanger Institute for the COVID-19 Genomics UK (COG-UK) Consortium                | Jacquelyn Wynn, Mairead Hyland, The Lighthouse Lab in Alderley Park and Alex Alderton, Roberto Amato, Sonia Goncalves, Ewan Harrison, David K. Jackson, Ian Johnston, Dominic Kwiatkowski, Cordelia Langford, John Sillitoe on behalf of the Wellcome Sanger Institute COVID-19 Surveillance Team |
| EP1_ISL_781221                                                                                                                                                                                                                                                                                                                                                                                                                                                                                                                                                                                                                                                                                                                                                                                                                                                                                                                                                                                                                                                                                                                                                                                                                                                                                                                                                                                                                                                                                                                                                                                                                                                                                                                                                                                                                                                                                                                                                                                                                                                                                                                                                                                                                                                                                                                                                                                                                                                                                                                                                                                                                                                                                                                                                                                                                                                                                                                                                                                                                                                                                                                                                                                                                                                                                                                                                                                                                                                                                                                                                                                 | Lighthouse Lab in Cambridge                                                                   | Welcome Sanger Institute for the COVID-19 Genomics UK (COG-UK) Consortium                | Jacquelyn Wynn, Mairead Hyland, The Lighthouse Lab in Alderley Park and Alex Alderton, Roberto Amato, Sonia Goncalves, Ewan Harrison, David K. Jackson, Ian Johnston, Dominic Kwiatkowski, Cordelia Langford, John Sillitoe on behalf of the Wellcome Sanger Institute COVID-19 Surveillance Team |
| EP1_ISL_781226, EP1_ISL_781230                                                                                                                                                                                                                                                                                                                                                                                                                                                                                                                                                                                                                                                                                                                                                                                                                                                                                                                                                                                                                                                                                                                                                                                                                                                                                                                                                                                                                                                                                                                                                                                                                                                                                                                                                                                                                                                                                                                                                                                                                                                                                                                                                                                                                                                                                                                                                                                                                                                                                                                                                                                                                                                                                                                                                                                                                                                                                                                                                                                                                                                                                                                                                                                                                                                                                                                                                                                                                                                                                                                                                                 | Lighthouse Lab in Alderley Park                                                               | Welcome Sanger Institute for the COVID-19 Genomics UK (COG-UK) Consortium                | Rob Howes, The Lighthouse Lab in Cambridge and Alex Alderton, Roberto Amato, Sonia Goncalves, Ewan Harrison, David K. Jackson, Ian Johnston, Dominic Kwiatkowski, Cordelia Langford, John Sillitoe on behalf of the Wellcome Sanger Institute COVID-19 Surveillance Team                          |
| EP1_ISL_781233, EP1_ISL_781238, EP1_ISL_781241, EP1_ISL_781244, EP1_ISL_781245                                                                                                                                                                                                                                                                                                                                                                                                                                                                                                                                                                                                                                                                                                                                                                                                                                                                                                                                                                                                                                                                                                                                                                                                                                                                                                                                                                                                                                                                                                                                                                                                                                                                                                                                                                                                                                                                                                                                                                                                                                                                                                                                                                                                                                                                                                                                                                                                                                                                                                                                                                                                                                                                                                                                                                                                                                                                                                                                                                                                                                                                                                                                                                                                                                                                                                                                                                                                                                                                                                                 | Lighthouse Lab in Milton Keynes                                                               | Welcome Sanger Institute for the COVID-19 Genomics UK (COG-UK) Consortium                | The Lighthouse Lab in Milton Keynes and Alex Alderton, Roberto Amato, Sonia Goncalves, Ewan Harrison, David K. Jackson, Ian Johnston, Dominic Kwiatkowski, Cordelia Langford, John Sillitoe on behalf of the Wellcome Sanger Institute COVID-19 Surveillance Team                                 |
| EP1_ISL_781250                                                                                                                                                                                                                                                                                                                                                                                                                                                                                                                                                                                                                                                                                                                                                                                                                                                                                                                                                                                                                                                                                                                                                                                                                                                                                                                                                                                                                                                                                                                                                                                                                                                                                                                                                                                                                                                                                                                                                                                                                                                                                                                                                                                                                                                                                                                                                                                                                                                                                                                                                                                                                                                                                                                                                                                                                                                                                                                                                                                                                                                                                                                                                                                                                                                                                                                                                                                                                                                                                                                                                                                 | Lighthouse Lab in Alderley Park                                                               | Welcome Sanger Institute for the COVID-19 Genomics UK (COG-UK) Consortium                | Jacquelyn Wynn, Mairead Hyland, The Lighthouse Lab in Alderley Park and Alex Alderton, Roberto Amato, Sonia Goncalves, Ewan Harrison, David K. Jackson, Ian Johnston, Dominic Kwiatkowski, Cordelia Langford, John Sillitoe on behalf of the Wellcome Sanger Institute COVID-19 Surveillance Team |
| EP1_ISL_781258                                                                                                                                                                                                                                                                                                                                                                                                                                                                                                                                                                                                                                                                                                                                                                                                                                                                                                                                                                                                                                                                                                                                                                                                                                                                                                                                                                                                                                                                                                                                                                                                                                                                                                                                                                                                                                                                                                                                                                                                                                                                                                                                                                                                                                                                                                                                                                                                                                                                                                                                                                                                                                                                                                                                                                                                                                                                                                                                                                                                                                                                                                                                                                                                                                                                                                                                                                                                                                                                                                                                                                                 | Lighthouse Lab in Cambridge                                                                   | Welcome Sanger Institute for the COVID-19 Genomics UK (COG-UK) Consortium                | Rob Howes, The Lighthouse Lab in Cambridge and Alex Alderton, Roberto Amato, Sonia Goncalves, Ewan Harrison, David K. Jackson, Ian Johnston, Dominic Kwiatkowski, Cordelia Langford, John Sillitoe on behalf of the Wellcome Sanger Institute COVID-19 Surveillance Team                          |
| EP1_ISL_781259, EP1_ISL_781262, EP1_ISL_781263, EP1_ISL_781262, EP1_ISL_781264, EP1_ISL_781265, EP1_ISL_781266, EP1_ISL_781267, EP1_ISL_781307, EP1_ISL_781313, EP1_ISL_781323                                                                                                                                                                                                                                                                                                                                                                                                                                                                                                                                                                                                                                                                                                                                                                                                                                                                                                                                                                                                                                                                                                                                                                                                                                                                                                                                                                                                                                                                                                                                                                                                                                                                                                                                                                                                                                                                                                                                                                                                                                                                                                                                                                                                                                                                                                                                                                                                                                                                                                                                                                                                                                                                                                                                                                                                                                                                                                                                                                                                                                                                                                                                                                                                                                                                                                                                                                                                                 | Lighthouse Lab in Alderley Park                                                               | Welcome Sanger Institute for the COVID-19 Genomics UK (COG-UK) Consortium                | Jacquelyn Wynn, Mairead Hyland, The Lighthouse Lab in Alderley Park and Alex Alderton, Roberto Amato, Sonia Goncalves, Ewan Harrison, David K. Jackson, Ian Johnston, Dominic Kwiatkowski, Cordelia Langford, John Sillitoe on behalf of the Wellcome Sanger Institute COVID-19 Surveillance Team |
| EP1_ISL_781334                                                                                                                                                                                                                                                                                                                                                                                                                                                                                                                                                                                                                                                                                                                                                                                                                                                                                                                                                                                                                                                                                                                                                                                                                                                                                                                                                                                                                                                                                                                                                                                                                                                                                                                                                                                                                                                                                                                                                                                                                                                                                                                                                                                                                                                                                                                                                                                                                                                                                                                                                                                                                                                                                                                                                                                                                                                                                                                                                                                                                                                                                                                                                                                                                                                                                                                                                                                                                                                                                                                                                                                 | Lighthouse Lab in Milton Keynes                                                               | Welcome Sanger Institute for the COVID-19 Genomics UK (COG-UK) Consortium                | The Lighthouse Lab in Milton Keynes and Alex Alderton, Roberto Amato, Sonia Goncalves, Ewan Harrison, David K. Jackson, Ian Johnston, Dominic Kwiatkowski, Cordelia Langford, John Sillitoe on behalf of the Wellcome Sanger Institute COVID-19 Surveillance Team                                 |
| EP1_ISL_781336, EP1_ISL_781349, EP1_ISL_781352, EP1_ISL_781356, EP1_ISL_781375                                                                                                                                                                                                                                                                                                                                                                                                                                                                                                                                                                                                                                                                                                                                                                                                                                                                                                                                                                                                                                                                                                                                                                                                                                                                                                                                                                                                                                                                                                                                                                                                                                                                                                                                                                                                                                                                                                                                                                                                                                                                                                                                                                                                                                                                                                                                                                                                                                                                                                                                                                                                                                                                                                                                                                                                                                                                                                                                                                                                                                                                                                                                                                                                                                                                                                                                                                                                                                                                                                                 | Lighthouse Lab in Alderley Park                                                               | Welcome Sanger Institute for the COVID-19 Genomics UK (COG-UK) Consortium                | Jacquelyn Wynn, Mairead Hyland, The Lighthouse Lab in Alderley Park and Alex Alderton, Roberto Amato, Sonia Goncalves, Ewan Harrison, David K. Jackson, Ian Johnston, Dominic Kwiatkowski, Cordelia Langford, John Sillitoe on behalf of the Wellcome Sanger Institute COVID-19 Surveillance Team |
| EP1_ISL_781398                                                                                                                                                                                                                                                                                                                                                                                                                                                                                                                                                                                                                                                                                                                                                                                                                                                                                                                                                                                                                                                                                                                                                                                                                                                                                                                                                                                                                                                                                                                                                                                                                                                                                                                                                                                                                                                                                                                                                                                                                                                                                                                                                                                                                                                                                                                                                                                                                                                                                                                                                                                                                                                                                                                                                                                                                                                                                                                                                                                                                                                                                                                                                                                                                                                                                                                                                                                                                                                                                                                                                                                 | Lighthouse Lab in Milton Keynes                                                               | Welcome Sanger Institute for the COVID-19 Genomics UK (COG-UK) Consortium                | The Lighthouse Lab in Milton Keynes and Alex Alderton, Roberto Amato, Sonia Goncalves, Ewan Harrison, David K. Jackson, Ian Johnston, Dominic Kwiatkowski, Cordelia Langford, John Sillitoe on behalf of the Wellcome Sanger Institute COVID-19 Surveillance Team                                 |
| EP1_ISL_781400                                                                                                                                                                                                                                                                                                                                                                                                                                                                                                                                                                                                                                                                                                                                                                                                                                                                                                                                                                                                                                                                                                                                                                                                                                                                                                                                                                                                                                                                                                                                                                                                                                                                                                                                                                                                                                                                                                                                                                                                                                                                                                                                                                                                                                                                                                                                                                                                                                                                                                                                                                                                                                                                                                                                                                                                                                                                                                                                                                                                                                                                                                                                                                                                                                                                                                                                                                                                                                                                                                                                                                                 | Lighthouse Lab in Alderley Park                                                               | Welcome Sanger Institute for the COVID-19 Genomics UK (COG-UK) Consortium                | Jacquelyn Wynn, Mairead Hyland, The Lighthouse Lab in Alderley Park and Alex Alderton, Roberto Amato, Sonia Goncalves, Ewan Harrison, David K. Jackson, Ian Johnston, Dominic Kwiatkowski, Cordelia Langford, John Sillitoe on behalf of the Wellcome Sanger Institute COVID-19 Surveillance Team |
| EP1_ISL_781411, EP1_ISL_781423                                                                                                                                                                                                                                                                                                                                                                                                                                                                                                                                                                                                                                                                                                                                                                                                                                                                                                                                                                                                                                                                                                                                                                                                                                                                                                                                                                                                                                                                                                                                                                                                                                                                                                                                                                                                                                                                                                                                                                                                                                                                                                                                                                                                                                                                                                                                                                                                                                                                                                                                                                                                                                                                                                                                                                                                                                                                                                                                                                                                                                                                                                                                                                                                                                                                                                                                                                                                                                                                                                                                                                 | Lighthouse Lab in Milton Keynes                                                               | Welcome Sanger Institute for the COVID-19 Genomics UK (COG-UK) Consortium                | The Lighthouse Lab in Milton Keynes and Alex Alderton, Roberto Amato, Sonia Goncalves, Ewan Harrison, David K. Jackson, Ian Johnston, Dominic Kwiatkowski, Cordelia Langford, John Sillitoe on behalf of the Wellcome Sanger Institute COVID-19 Surveillance Team                                 |
| EP1_ISL_781446, EP1_ISL_781447, EP1_ISL_781456, EP1_ISL_781457, EP1_ISL_781458, EP1_ISL_781463, EP1_ISL_781465, EP1_ISL_781475                                                                                                                                                                                                                                                                                                                                                                                                                                                                                                                                                                                                                                                                                                                                                                                                                                                                                                                                                                                                                                                                                                                                                                                                                                                                                                                                                                                                                                                                                                                                                                                                                                                                                                                                                                                                                                                                                                                                                                                                                                                                                                                                                                                                                                                                                                                                                                                                                                                                                                                                                                                                                                                                                                                                                                                                                                                                                                                                                                                                                                                                                                                                                                                                                                                                                                                                                                                                                                                                 | Lighthouse Lab in Alderley Park                                                               | Welcome Sanger Institute for the COVID-19 Genomics UK (COG-UK) Consortium                | Jacquelyn Wynn, Mairead Hyland, The Lighthouse Lab in Alderley Park and Alex Alderton, Roberto Amato, Sonia Goncalves, Ewan Harrison, David K. Jackson, Ian Johnston, Dominic Kwiatkowski, Cordelia Langford, John Sillitoe on behalf of the Wellcome Sanger Institute COVID-19 Surveillance Team |
| EP1_ISL_781493                                                                                                                                                                                                                                                                                                                                                                                                                                                                                                                                                                                                                                                                                                                                                                                                                                                                                                                                                                                                                                                                                                                                                                                                                                                                                                                                                                                                                                                                                                                                                                                                                                                                                                                                                                                                                                                                                                                                                                                                                                                                                                                                                                                                                                                                                                                                                                                                                                                                                                                                                                                                                                                                                                                                                                                                                                                                                                                                                                                                                                                                                                                                                                                                                                                                                                                                                                                                                                                                                                                                                                                 | Lighthouse Lab in Milton Keynes                                                               | Welcome Sanger Institute for the COVID-19 Genomics UK (COG-UK) Consortium                | Rob Howes, The Lighthouse Lab in Cambridge and Alex Alderton, Roberto Amato, Sonia Goncalves, Ewan Harrison, David K. Jackson, Ian Johnston, Dominic Kwiatkowski, Cordelia Langford, John Sillitoe on behalf of the Wellcome Sanger Institute COVID-19 Surveillance Team                          |
| EP1_ISL_781495, EP1_ISL_781499, EP1_ISL_781502, EP1_ISL_781505, EP1_ISL_781510, EP1_ISL_781516                                                                                                                                                                                                                                                                                                                                                                                                                                                                                                                                                                                                                                                                                                                                                                                                                                                                                                                                                                                                                                                                                                                                                                                                                                                                                                                                                                                                                                                                                                                                                                                                                                                                                                                                                                                                                                                                                                                                                                                                                                                                                                                                                                                                                                                                                                                                                                                                                                                                                                                                                                                                                                                                                                                                                                                                                                                                                                                                                                                                                                                                                                                                                                                                                                                                                                                                                                                                                                                                                                 | Lighthouse Lab in Alderley Park                                                               | Welcome Sanger Institute for the COVID-19 Genomics UK (COG-UK) Consortium                | The Lighthouse Lab in Milton Keynes and Alex Alderton, Roberto Amato, Sonia Goncalves, Ewan Harrison, David K. Jackson, Ian Johnston, Dominic Kwiatkowski, Cordelia Langford, John Sillitoe on behalf of the Wellcome Sanger Institute COVID-19 Surveillance Team                                 |
| EP1_ISL_781535, EP1_ISL_781551, EP1_ISL_781559, EP1_ISL_781570, EP1_ISL_781573, EP1_ISL_781603, EP1_ISL_781604, EP1_ISL_781607                                                                                                                                                                                                                                                                                                                                                                                                                                                                                                                                                                                                                                                                                                                                                                                                                                                                                                                                                                                                                                                                                                                                                                                                                                                                                                                                                                                                                                                                                                                                                                                                                                                                                                                                                                                                                                                                                                                                                                                                                                                                                                                                                                                                                                                                                                                                                                                                                                                                                                                                                                                                                                                                                                                                                                                                                                                                                                                                                                                                                                                                                                                                                                                                                                                                                                                                                                                                                                                                 | Lighthouse Lab in Cambridge                                                                   | Welcome Sanger Institute for the COVID-19 Genomics UK (COG-UK) Consortium                | Jacquelyn Wynn, Mairead Hyland, The Lighthouse Lab in Alderley Park and Alex Alderton, Roberto Amato, Sonia Goncalves, Ewan Harrison, David K. Jackson, Ian Johnston, Dominic Kwiatkowski, Cordelia Langford, John Sillitoe on behalf of the Wellcome Sanger Institute COVID-19 Surveillance Team |
| EP1_ISL_781617                                                                                                                                                                                                                                                                                                                                                                                                                                                                                                                                                                                                                                                                                                                                                                                                                                                                                                                                                                                                                                                                                                                                                                                                                                                                                                                                                                                                                                                                                                                                                                                                                                                                                                                                                                                                                                                                                                                                                                                                                                                                                                                                                                                                                                                                                                                                                                                                                                                                                                                                                                                                                                                                                                                                                                                                                                                                                                                                                                                                                                                                                                                                                                                                                                                                                                                                                                                                                                                                                                                                                                                 | Lighthouse Lab in Milton Keynes                                                               | Welcome Sanger Institute for the COVID-19 Genomics UK (COG-UK) Consortium                | Rob Howes, The Lighthouse Lab in Cambridge and Alex Alderton, Roberto Amato, Sonia Goncalves, Ewan Harrison, David K. Jackson, Ian Johnston, Dominic Kwiatkowski, Cordelia Langford, John Sillitoe on behalf of the Wellcome Sanger Institute COVID-19 Surveillance Team                          |
| EP1_ISL_781625                                                                                                                                                                                                                                                                                                                                                                                                                                                                                                                                                                                                                                                                                                                                                                                                                                                                                                                                                                                                                                                                                                                                                                                                                                                                                                                                                                                                                                                                                                                                                                                                                                                                                                                                                                                                                                                                                                                                                                                                                                                                                                                                                                                                                                                                                                                                                                                                                                                                                                                                                                                                                                                                                                                                                                                                                                                                                                                                                                                                                                                                                                                                                                                                                                                                                                                                                                                                                                                                                                                                                                                 | Lighthouse Lab in Cambridge                                                                   | Welcome Sanger Institute for the COVID-19 Genomics UK (COG-UK) Consortium                | The Lighthouse Lab in Milton Keynes and Alex Alderton, Roberto Amato, Sonia Goncalves, Ewan Harrison, David K. Jackson, Ian Johnston, Dominic Kwiatkowski, Cordelia Langford, John Sillitoe on behalf of the Wellcome Sanger Institute COVID-19 Surveillance Team                                 |
| EP1_ISL_781625                                                                                                                                                                                                                                                                                                                                                                                                                                                                                                                                                                                                                                                                                                                                                                                                                                                                                                                                                                                                                                                                                                                                                                                                                                                                                                                                                                                                                                                                                                                                                                                                                                                                                                                                                                                                                                                                                                                                                                                                                                                                                                                                                                                                                                                                                                                                                                                                                                                                                                                                                                                                                                                                                                                                                                                                                                                                                                                                                                                                                                                                                                                                                                                                                                                                                                                                                                                                                                                                                                                                                                                 | Lighthouse Lab in Cambridge                                                                   | Welcome Sanger Institute for the COVID-19 Genomics UK (COG-UK) Consortium                | Rob Howes, The Lighthouse Lab in Cambridge and Alex Alderton, Roberto Amato, Sonia Goncalves, Ewan Harrison, David K. Jackson, Ian Johnston, Dominic Kwiatkowski, Cordelia Langford, John Sillitoe on behalf of the Wellcome Sanger Institute COVID-19 Surveillance Team                          |













EPI\_ISL\_793821, EPI\_ISL\_793825, EPI\_ISL\_793837, EPI\_ISL\_7938917, EPI\_ISL\_793850, EPI\_ISL\_793888, EPI\_ISL\_794347, EPI\_ISL\_794507, EPI\_ISL\_794511, EPI\_ISL\_794587  
see above  
Department of Virus and Microbiological Special Diagnostics, Statens Serum Institut, Copenhagen, Denmark  
EPI\_ISL\_794614  
LabDT US  
Institute of Environmental Science and Research (ESR)  
Aalborg University, Denmark

EPI\_ISL\_794626  
Middlemore Hospital  
Institute of Environmental Science and Research (ESR)

EPI\_ISL\_794677  
PathWest Laboratory Medicine WA  
PathWest Laboratory Medicine WA Microbial Surveillance Unit

EPI\_ISL\_794737, EPI\_ISL\_794738  
1-Laboratory of Microbiology, National Reference Lab, Charles Nicolle Hospital, 2-University of Tunis ElManar, Faculty of Medicine of Tunis, LF93E509, Tunis, Tunisia  
1-Clinical and Experimental Pharmacology Lab, LFI6SP02, National Center of Pharmacovigilance, University of Tunis El Manar, Tunis, Tunisia  
2-Neurodegenerative diseases and psychiatric troubles, LRI83P03, Razi Hospital, University of Tunis El Manar, Tunis, Tunisia  
3- Ministry of Health, National Observatory of New and Emerging Diseases, 1006, Tunis, Tunisia

EPI\_ISL\_794753  
Ospedale Cardinale G. Panico  
Istituto Zoonofiliatico Sperimentale della Puglia e della Basilicata

EPI\_ISL\_794759, EPI\_ISL\_794764, EPI\_ISL\_794776, EPI\_ISL\_794780, EPI\_ISL\_794783, EPI\_ISL\_794793, EPI\_ISL\_794794, EPI\_ISL\_794797, EPI\_ISL\_794802, EPI\_ISL\_794803, EPI\_ISL\_794806, EPI\_ISL\_794807, EPI\_ISL\_794810, EPI\_ISL\_794811, EPI\_ISL\_794815  
see above  
Istituto Zoonofiliatico Sperimentale della Puglia e della Basilicata  
Istituto Zoonofiliatico Sperimentale della Puglia e della Basilicata  
Istituto Zoonofiliatico Sperimentale della Venetia Basilicata

EPI\_ISL\_794826  
ULSS 7 Pedemontana - Distretto 2  
Istituto Zoonofiliatico Sperimentale della Venetia Basilicata

EPI\_ISL\_794937, EPI\_ISL\_795011, EPI\_ISL\_795426, EPI\_ISL\_795444, EPI\_ISL\_795452, EPI\_ISL\_795467, EPI\_ISL\_795470, EPI\_ISL\_795475, EPI\_ISL\_795483, EPI\_ISL\_795519, EPI\_ISL\_795522, EPI\_ISL\_795524, EPI\_ISL\_795555, EPI\_ISL\_795557, EPI\_ISL\_795580, EPI\_ISL\_795581, EPI\_ISL\_795587, EPI\_ISL\_795588, EPI\_ISL\_795615, EPI\_ISL\_795624, EPI\_ISL\_795662, EPI\_ISL\_795676, EPI\_ISL\_795679, EPI\_ISL\_795728, EPI\_ISL\_795740, EPI\_ISL\_795796, EPI\_ISL\_795895, EPI\_ISL\_795896, EPI\_ISL\_795909, EPI\_ISL\_795923, EPI\_ISL\_795952, EPI\_ISL\_795999  
see above  
Department of Virus and Microbiology, Special Diagnostics, Statens Serum Institut, Copenhagen, Denmark  
Albertsen Lab, Department of Chemistry and Bioscience, Aalborg University, Denmark  
Salta Sierra, Gibrán Rubio, Zvezlana Trassalonia, Dominik Aschmeier, Eva Heger, Elena Kropp, Rolf Kaiser, Maximilian Damagetz, Andreas Walker, Jörg Timm, Alexander Dittley, Martin Dummer, Alex Thienau

EPI\_ISL\_796027, EPI\_ISL\_796028, EPI\_ISL\_796029, EPI\_ISL\_796030, EPI\_ISL\_796031, EPI\_ISL\_796032, EPI\_ISL\_796033, EPI\_ISL\_796034, EPI\_ISL\_796035, EPI\_ISL\_796036, EPI\_ISL\_796037, EPI\_ISL\_796038, EPI\_ISL\_796042, EPI\_ISL\_796046  
see above  
Institute of Virology, University of Cologne  
Institute of Virology, University of Cologne  
Salta Sierra, Gibrán Rubio, Zvezlana Trassalonia, Dominik Aschmeier, Eva Heger, Elena Kropp, Rolf Kaiser, Maximilian Damagetz, Andreas Walker, Jörg Timm, Alexander Dittley, Martin Dummer, Alex Thienau

EPI\_ISL\_796160, EPI\_ISL\_796163, EPI\_ISL\_796173, EPI\_ISL\_796177, EPI\_ISL\_796180, EPI\_ISL\_796181, EPI\_ISL\_796182, EPI\_ISL\_796183, EPI\_ISL\_796189, EPI\_ISL\_796195, EPI\_ISL\_796198, EPI\_ISL\_796205, EPI\_ISL\_796213, EPI\_ISL\_796215, EPI\_ISL\_796216, EPI\_ISL\_796220, EPI\_ISL\_796248, EPI\_ISL\_796250, EPI\_ISL\_796251, EPI\_ISL\_796265, EPI\_ISL\_796268, EPI\_ISL\_796279, EPI\_ISL\_796285, EPI\_ISL\_796293, EPI\_ISL\_796336, EPI\_ISL\_796345, EPI\_ISL\_796347, EPI\_ISL\_796351, EPI\_ISL\_796358, EPI\_ISL\_796382, EPI\_ISL\_796390, EPI\_ISL\_796392, EPI\_ISL\_796393, EPI\_ISL\_796398, EPI\_ISL\_796400, EPI\_ISL\_796401, EPI\_ISL\_796403, EPI\_ISL\_796405, EPI\_ISL\_796414, EPI\_ISL\_796419, EPI\_ISL\_796426, EPI\_ISL\_796437, EPI\_ISL\_796441, EPI\_ISL\_796469, EPI\_ISL\_796471, EPI\_ISL\_796476, EPI\_ISL\_796482, EPI\_ISL\_796491, EPI\_ISL\_796494, EPI\_ISL\_796509, EPI\_ISL\_796511, EPI\_ISL\_796514, EPI\_ISL\_796515, EPI\_ISL\_796519, EPI\_ISL\_796542, EPI\_ISL\_796545, EPI\_ISL\_796547, EPI\_ISL\_796548, EPI\_ISL\_796553, EPI\_ISL\_796555, EPI\_ISL\_796558, EPI\_ISL\_796582, EPI\_ISL\_796584, EPI\_ISL\_796586, EPI\_ISL\_796588, EPI\_ISL\_796572, EPI\_ISL\_796576, EPI\_ISL\_796589, EPI\_ISL\_796596, EPI\_ISL\_796598, EPI\_ISL\_796599, EPI\_ISL\_796605, EPI\_ISL\_796627, EPI\_ISL\_796633, EPI\_ISL\_796642, EPI\_ISL\_796643, EPI\_ISL\_796643, EPI\_ISL\_796646  
see above  
Vollier AG  
Department of Biosystems Science and Engineering, ETH Zurich

EPI\_ISL\_796671  
Fursi Medical Laboratory  
Norwegian Institute of Public Health, Department of Virology

EPI\_ISL\_796684  
Norwegian Institute of Public Health, Department of Virology

EPI\_ISL\_796712  
Akershus University Hospital, Department for Microbiology and Infectious Disease Control  
Norwegian Institute of Public Health, Department of Virology

EPI\_ISL\_796722  
Fursi Medical Laboratory  
Norwegian Institute of Public Health, Department of Virology

EPI\_ISL\_796776, EPI\_ISL\_796777, EPI\_ISL\_796778, EPI\_ISL\_796779, EPI\_ISL\_796781  
Instituto Nacional de Saude (INSA)  
Instituto Nacional de Saude (INSA)

EPI\_ISL\_796789, EPI\_ISL\_796795, EPI\_ISL\_796796, EPI\_ISL\_796810, EPI\_ISL\_796811, EPI\_ISL\_796812, EPI\_ISL\_796823, EPI\_ISL\_796825, EPI\_ISL\_796833, EPI\_ISL\_796838, EPI\_ISL\_796841, EPI\_ISL\_796843, EPI\_ISL\_796850, EPI\_ISL\_796851, EPI\_ISL\_796858, EPI\_ISL\_796860, EPI\_ISL\_796862, EPI\_ISL\_796866, EPI\_ISL\_796867, EPI\_ISL\_796874, EPI\_ISL\_796877, EPI\_ISL\_796880, EPI\_ISL\_796885, EPI\_ISL\_796888, EPI\_ISL\_796892, EPI\_ISL\_796893, EPI\_ISL\_796894, EPI\_ISL\_796897, EPI\_ISL\_796898, EPI\_ISL\_796917, EPI\_ISL\_796922, EPI\_ISL\_796937, EPI\_ISL\_796939, EPI\_ISL\_797006, EPI\_ISL\_797009, EPI\_ISL\_797016, EPI\_ISL\_797021, EPI\_ISL\_797022, EPI\_ISL\_797036, EPI\_ISL\_797036, EPI\_ISL\_797039, EPI\_ISL\_797058, EPI\_ISL\_797062, EPI\_ISL\_797062, EPI\_ISL\_797073, EPI\_ISL\_797074, EPI\_ISL\_797078, EPI\_ISL\_797083, EPI\_ISL\_797084, EPI\_ISL\_797087, EPI\_ISL\_797089, EPI\_ISL\_797102, EPI\_ISL\_797112, EPI\_ISL\_797113, EPI\_ISL\_797117  
see above  
Lighthouse Lab in Alderley Park  
Lighthouse Lab in Milton Keynes  
Lighthouse Lab in Glasgow  
Lighthouse Lab in Glasgow

EPI\_ISL\_797138, EPI\_ISL\_797164, EPI\_ISL\_797198, EPI\_ISL\_797211, EPI\_ISL\_797223, EPI\_ISL\_797309, EPI\_ISL\_797311, EPI\_ISL\_797338  
Instituto Nacional de Saude (INSA)  
Instituto Nacional de Saude (INSA)

EPI\_ISL\_797400  
Lighthouse Lab in Cambridge  
Welcome Sanger Institute for the COVID-19 Genomics UK (COG-UK) Consortium

EPI\_ISL\_797408  
Lighthouse Lab in Glasgow  
Welcome Sanger Institute for the COVID-19 Genomics UK (COG-UK) Consortium

EPI\_ISL\_797434, EPI\_ISL\_797439  
Lighthouse Lab in Cambridge  
Welcome Sanger Institute for the COVID-19 Genomics UK (COG-UK) Consortium

EPI\_ISL\_797459  
Lighthouse Lab in Glasgow  
Welcome Sanger Institute for the COVID-19 Genomics UK (COG-UK) Consortium

Xiayun Ren, Matt Storey, Nikki Freed, Muhammad Faisal, Jing Wang, Hernes Perez, Anja Werner, Antje van der Linden, Ario Upton, Chris Mansell, David Hammer, Dragana Dinkovic, Gary McAuliffe, Hana Sofia Andersson, James Ussher, Jill Shawood, Josi Freeman, Julia Howard, Juliet Eivy, Mary DeAlmeida, Matthew Rogers, Max Bloomfield, Michael Addie, Michele Bain, Sally Roberts, Sarah Jeffersons, Shermin Multayan, Susan Moppett, Susant Taylor, Timothy Blackmore, Vanu Satiyendran, Veronica Payne, Virginia Hope, Erasmus Smitt, Lauren Jely, Olaf Stander, Joep de Licht  
Khaoyun Ren, Matt Storey, Nikki Freed, Muhammad Faisal, Jing Wang, Hernes Perez, Anja Werner, Antje van der Linden, Ario Upton, Chris Mansell, David Hammer, Dragana Dinkovic, Gary McAuliffe, Hana Sofia Andersson, James Ussher, Jill Shawood, Josi Freeman, Julia Howard, Juliet Eivy, Mary DeAlmeida, Matthew Rogers, Max Bloomfield, Michael Addie, Michele Bain, Sally Roberts, Sarah Jeffersons, Shermin Multayan, Susan Moppett, Susant Taylor, Timothy Blackmore, Vanu Satiyendran, Veronica Payne, Virginia Hope, Erasmus Smitt, Lauren Jely, Olaf Stander, Joep de Licht

Ilhem Boubta-Den Boubaker, Sameh Trabelsi, Nissat Ben Abaya, Maher Kharat, Ala Ben Knailla, Jalaa Ben Krailli, Salma Abid, Sara Ferjan, Mouna Ben Sassi, Mouna Sater, Zahab Hamzaoui, Guedi Ali Barhen, Hayba Ben Romdhane, Soussi Amira, Sara Chammam, Hanen El Jebart, Asma Ferjan, Gates Emma, Riadh Daghous, Riadh Gouider.  
PathWest Laboratory Medicine WA Microbial Surveillance Unit

Parisi A, Bianco A, Capozzi L., Del Sambro L., Mendzulli V, Rondinone V., Pace L., Cipolletta D., Galatone D.  
Parisi A, Bianco A, Capozzi L., Del Sambro L., Mendzulli V, Rondinone V., Pace L., Cipolletta D., Galatone D.  
Parisi A, Bianco A, Capozzi L., Del Sambro L., Mendzulli V, Rondinone V., Pace L., Cipolletta D., Galatone D.  
Adelaide Milani, Alessia Schivo, Annalisa Salvato, Erika Giorgia Quaranta, Ambra Pastorini, Bianca Zecchin, Alice Fusaro, Isabella Wome, Calogero Terreggino, Antonia Ricci

Kathrine Stene-Johansen, Kamilla Heddeland Instefjord, Hilde Eirshaug, Aivya R AllMarie Paulsen Madson, Rasmus Rils Kopperud, Hilde Volian, Katrine Bragstad, Olav Hungnes  
Kathrine Stene-Johansen, Kamilla Heddeland Instefjord, Hilde Eirshaug, Aivya R AllMarie Paulsen Madson, Rasmus Rils Kopperud, Hilde Volian, Katrine Bragstad, Olav Hungnes  
Kathrine Stene-Johansen, Kamilla Heddeland Instefjord, Hilde Eirshaug, Aivya R AllMarie Paulsen Madson, Rasmus Rils Kopperud, Hilde Volian, Katrine Bragstad, Olav Hungnes

Kathrine Stene-Johansen, Kamilla Heddeland Instefjord, Hilde Eirshaug, Aivya R AllMarie Paulsen Madson, Rasmus Rils Kopperud, Hilde Volian, Katrine Bragstad, Olav Hungnes

Kathrine Stene-Johansen, Kamilla Heddeland Instefjord, Hilde Eirshaug, Aivya R AllMarie Paulsen Madson, Rasmus Rils Kopperud, Hilde Volian, Katrine Bragstad, Olav Hungnes

Kathrine Stene-Johansen, Kamilla Heddeland Instefjord, Hilde Eirshaug, Aivya R AllMarie Paulsen Madson, Rasmus Rils Kopperud, Hilde Volian, Katrine Bragstad, Olav Hungnes

Chaoron Chen, Sarah Neakaeu, Catharine Aquino, Ivan Topolsky, Philipp Jablonksi, Lara Fahrman, David Dralisc, Katharina Jahn, Andreia Cabral de Gouveia, Maria Domenica Mocca, Simon Gröber, Timothy Sykes, Lemnat Optik, Griffin White, Laura Neff, Doris Popovic, Andrea Patrangali, Jay Traoy, Ralph Schlapbach, Christiane Beckmann, Maurice Redouan, Maurice Kopp, Christoph Noppin, Sophie Seidel, Noémie Santamaría de Souza, Niko Beerwinkel, Tanja Stadler

Jacquelyn Wynn, Mairead Hyland, The Lighthouse Lab in Alderley Park and Alex Alderton, Roberto Amato, Sonia Goncalves, Ewan Harrison, David K Jackson, Ian Johnston, Dominic Kwiatkowski, Cordelia Langford, John Sillitoe on behalf of the Wellcome Sanger Institute COVID-19 Surveillance Team  
The Lighthouse Lab in Milton Keynes and Alex Alderton, Roberto Amato, Sonia Goncalves, Ewan Harrison, David K Jackson, Ian Johnston, Dominic Kwiatkowski, Cordelia Langford, John Sillitoe on behalf of the Wellcome Sanger Institute COVID-19 Surveillance Team  
The Lighthouse Lab in Cambridge and Alex Alderton, Roberto Amato, Sonia Goncalves, Ewan Harrison, David K Jackson, Ian Johnston, Dominic Kwiatkowski, Cordelia Langford, John Sillitoe on behalf of the Wellcome Sanger Institute COVID-19 Surveillance Team  
Harpreet Varsheeshwar, Yurni Kasai, David Gray, Carol Clugston, Anna Dominiczak and Alex Alderton, Roberto Amato, Sonia Goncalves, Ewan Harrison, David K Jackson, Ian Johnston, Dominic Kwiatkowski, Cordelia Langford, John Sillitoe on behalf of the Wellcome Sanger Institute COVID-19 Surveillance Team  
Harpreet Varsheeshwar, Yurni Kasai, David Gray, Carol Clugston, Anna Dominiczak and Alex Alderton, Roberto Amato, Sonia Goncalves, Ewan Harrison, David K Jackson, Ian Johnston, Dominic Kwiatkowski, Cordelia Langford, John Sillitoe on behalf of the Wellcome Sanger Institute COVID-19 Surveillance Team  
Harpreet Varsheeshwar, Yurni Kasai, David Gray, Carol Clugston, Anna Dominiczak and Alex Alderton, Roberto Amato, Sonia Goncalves, Ewan Harrison, David K Jackson, Ian Johnston, Dominic Kwiatkowski, Cordelia Langford, John Sillitoe on behalf of the Wellcome Sanger Institute COVID-19 Surveillance Team  
Harpreet Varsheeshwar, Yurni Kasai, David Gray, Carol Clugston, Anna Dominiczak and Alex Alderton, Roberto Amato, Sonia Goncalves, Ewan Harrison, David K Jackson, Ian Johnston, Dominic Kwiatkowski, Cordelia Langford, John Sillitoe on behalf of the Wellcome Sanger Institute COVID-19 Surveillance Team  
Harpreet Varsheeshwar, Yurni Kasai, David Gray, Carol Clugston, Anna Dominiczak and Alex Alderton, Roberto Amato, Sonia Goncalves, Ewan Harrison, David K Jackson, Ian Johnston, Dominic Kwiatkowski, Cordelia Langford, John Sillitoe on behalf of the Wellcome Sanger Institute COVID-19 Surveillance Team  
Harpreet Varsheeshwar, Yurni Kasai, David Gray, Carol Clugston, Anna Dominiczak and Alex Alderton, Roberto Amato, Sonia Goncalves, Ewan Harrison, David K Jackson, Ian Johnston, Dominic Kwiatkowski, Cordelia Langford, John Sillitoe on behalf of the Wellcome Sanger Institute COVID-19 Surveillance Team  
Harpreet Varsheeshwar, Yurni Kasai, David Gray, Carol Clugston, Anna Dominiczak and Alex Alderton, Roberto Amato, Sonia Goncalves, Ewan Harrison, David K Jackson, Ian Johnston, Dominic Kwiatkowski, Cordelia Langford, John Sillitoe on behalf of the Wellcome Sanger Institute COVID-19 Surveillance Team  
Harpreet Varsheeshwar, Yurni Kasai, David Gray, Carol Clugston, Anna Dominiczak and Alex Alderton, Roberto Amato, Sonia Goncalves, Ewan Harrison, David K Jackson, Ian Johnston, Dominic Kwiatkowski, Cordelia Langford, John Sillitoe on behalf of the Wellcome Sanger Institute COVID-19 Surveillance Team  
Harpreet Varsheeshwar, Yurni Kasai, David Gray, Carol Clugston, Anna Dominiczak and Alex Alderton, Roberto Amato, Sonia Goncalves, Ewan Harrison, David K Jackson, Ian Johnston, Dominic Kwiatkowski, Cordelia Langford, John Sillitoe on behalf of the Wellcome Sanger Institute COVID-19 Surveillance Team





















|                                                                                                                                                                                                                                                                                                                                                                                                                                                                                                                                                                                                                |                                         |                                                                            |                                                                                                                                                                                                                                                                                                                                                                                                                                                       |
|----------------------------------------------------------------------------------------------------------------------------------------------------------------------------------------------------------------------------------------------------------------------------------------------------------------------------------------------------------------------------------------------------------------------------------------------------------------------------------------------------------------------------------------------------------------------------------------------------------------|-----------------------------------------|----------------------------------------------------------------------------|-------------------------------------------------------------------------------------------------------------------------------------------------------------------------------------------------------------------------------------------------------------------------------------------------------------------------------------------------------------------------------------------------------------------------------------------------------|
| EPI_ISL_800786, EPI_ISL_800787                                                                                                                                                                                                                                                                                                                                                                                                                                                                                                                                                                                 | Lighthouse Lab in Glasgow               | Wellcome Sanger Institute for the COVID-19 Genomics UK (COG-UK) Consortium | Harper VanSteenhouse, Yurni Kasai, David Gray, Carol Clugston, Anna Dominiczak and Alex Alderton, Roberto Amato, Sonia Goncalves, Ewan Harrison, David K. Jackson, Ian Johnston, Dominic Kwiatkowski, Cordelia Langford, John Sillitoe on behalf of the Wellcome Sanger Institute COVID-19 Surveillance Team                                                                                                                                          |
| EPI_ISL_800789                                                                                                                                                                                                                                                                                                                                                                                                                                                                                                                                                                                                 | Lighthouse Lab in Milton Keynes         | Wellcome Sanger Institute for the COVID-19 Genomics UK (COG-UK) Consortium | The Lighthouse Lab in Milton Keynes and Alex Alderton, Roberto Amato, Sonia Goncalves, Ewan Harrison, David K. Jackson, Ian Johnston, Dominic Kwiatkowski, Cordelia Langford, John Sillitoe on behalf of the Wellcome Sanger Institute COVID-19 Surveillance Team                                                                                                                                                                                     |
| EPI_ISL_800790, EPI_ISL_800794, EPI_ISL_800796, EPI_ISL_800797, EPI_ISL_800799, EPI_ISL_800800, EPI_ISL_800801, EPI_ISL_800805, EPI_ISL_800809, EPI_ISL_800813                                                                                                                                                                                                                                                                                                                                                                                                                                                 | Lighthouse Lab in Glasgow               | Wellcome Sanger Institute for the COVID-19 Genomics UK (COG-UK) Consortium | Harper VanSteenhouse, Yurni Kasai, David Gray, Carol Clugston, Anna Dominiczak and Alex Alderton, Roberto Amato, Sonia Goncalves, Ewan Harrison, David K. Jackson, Ian Johnston, Dominic Kwiatkowski, Cordelia Langford, John Sillitoe on behalf of the Wellcome Sanger Institute COVID-19 Surveillance Team                                                                                                                                          |
| EPI_ISL_800820                                                                                                                                                                                                                                                                                                                                                                                                                                                                                                                                                                                                 | Lighthouse Lab in Milton Keynes         | Wellcome Sanger Institute for the COVID-19 Genomics UK (COG-UK) Consortium | The Lighthouse Lab in Milton Keynes and Alex Alderton, Roberto Amato, Sonia Goncalves, Ewan Harrison, David K. Jackson, Ian Johnston, Dominic Kwiatkowski, Cordelia Langford, John Sillitoe on behalf of the Wellcome Sanger Institute COVID-19 Surveillance Team                                                                                                                                                                                     |
| EPI_ISL_800823                                                                                                                                                                                                                                                                                                                                                                                                                                                                                                                                                                                                 | Lighthouse Lab in Glasgow               | Wellcome Sanger Institute for the COVID-19 Genomics UK (COG-UK) Consortium | Harper VanSteenhouse, Yurni Kasai, David Gray, Carol Clugston, Anna Dominiczak and Alex Alderton, Roberto Amato, Sonia Goncalves, Ewan Harrison, David K. Jackson, Ian Johnston, Dominic Kwiatkowski, Cordelia Langford, John Sillitoe on behalf of the Wellcome Sanger Institute COVID-19 Surveillance Team                                                                                                                                          |
| EPI_ISL_800824                                                                                                                                                                                                                                                                                                                                                                                                                                                                                                                                                                                                 | Lighthouse Lab in Milton Keynes         | Wellcome Sanger Institute for the COVID-19 Genomics UK (COG-UK) Consortium | The Lighthouse Lab in Milton Keynes and Alex Alderton, Roberto Amato, Sonia Goncalves, Ewan Harrison, David K. Jackson, Ian Johnston, Dominic Kwiatkowski, Cordelia Langford, John Sillitoe on behalf of the Wellcome Sanger Institute COVID-19 Surveillance Team                                                                                                                                                                                     |
| EPI_ISL_800826, EPI_ISL_800833                                                                                                                                                                                                                                                                                                                                                                                                                                                                                                                                                                                 | Lighthouse Lab in Glasgow               | Wellcome Sanger Institute for the COVID-19 Genomics UK (COG-UK) Consortium | Harper VanSteenhouse, Yurni Kasai, David Gray, Carol Clugston, Anna Dominiczak and Alex Alderton, Roberto Amato, Sonia Goncalves, Ewan Harrison, David K. Jackson, Ian Johnston, Dominic Kwiatkowski, Cordelia Langford, John Sillitoe on behalf of the Wellcome Sanger Institute COVID-19 Surveillance Team                                                                                                                                          |
| EPI_ISL_800836                                                                                                                                                                                                                                                                                                                                                                                                                                                                                                                                                                                                 | Lighthouse Lab in Milton Keynes         | Wellcome Sanger Institute for the COVID-19 Genomics UK (COG-UK) Consortium | The Lighthouse Lab in Milton Keynes and Alex Alderton, Roberto Amato, Sonia Goncalves, Ewan Harrison, David K. Jackson, Ian Johnston, Dominic Kwiatkowski, Cordelia Langford, John Sillitoe on behalf of the Wellcome Sanger Institute COVID-19 Surveillance Team                                                                                                                                                                                     |
| EPI_ISL_800840                                                                                                                                                                                                                                                                                                                                                                                                                                                                                                                                                                                                 | Lighthouse Lab in Milton Keynes         | Wellcome Sanger Institute for the COVID-19 Genomics UK (COG-UK) Consortium | The Lighthouse Lab in Milton Keynes and Alex Alderton, Roberto Amato, Sonia Goncalves, Ewan Harrison, David K. Jackson, Ian Johnston, Dominic Kwiatkowski, Cordelia Langford, John Sillitoe on behalf of the Wellcome Sanger Institute COVID-19 Surveillance Team                                                                                                                                                                                     |
| EPI_ISL_800843, EPI_ISL_800851, EPI_ISL_800852, EPI_ISL_800856                                                                                                                                                                                                                                                                                                                                                                                                                                                                                                                                                 | Lighthouse Lab in Glasgow               | Wellcome Sanger Institute for the COVID-19 Genomics UK (COG-UK) Consortium | Harper VanSteenhouse, Yurni Kasai, David Gray, Carol Clugston, Anna Dominiczak and Alex Alderton, Roberto Amato, Sonia Goncalves, Ewan Harrison, David K. Jackson, Ian Johnston, Dominic Kwiatkowski, Cordelia Langford, John Sillitoe on behalf of the Wellcome Sanger Institute COVID-19 Surveillance Team                                                                                                                                          |
| EPI_ISL_800857                                                                                                                                                                                                                                                                                                                                                                                                                                                                                                                                                                                                 | Lighthouse Lab in Milton Keynes         | Wellcome Sanger Institute for the COVID-19 Genomics UK (COG-UK) Consortium | The Lighthouse Lab in Milton Keynes and Alex Alderton, Roberto Amato, Sonia Goncalves, Ewan Harrison, David K. Jackson, Ian Johnston, Dominic Kwiatkowski, Cordelia Langford, John Sillitoe on behalf of the Wellcome Sanger Institute COVID-19 Surveillance Team                                                                                                                                                                                     |
| EPI_ISL_800860                                                                                                                                                                                                                                                                                                                                                                                                                                                                                                                                                                                                 | Lighthouse Lab in Glasgow               | Wellcome Sanger Institute for the COVID-19 Genomics UK (COG-UK) Consortium | Harper VanSteenhouse, Yurni Kasai, David Gray, Carol Clugston, Anna Dominiczak and Alex Alderton, Roberto Amato, Sonia Goncalves, Ewan Harrison, David K. Jackson, Ian Johnston, Dominic Kwiatkowski, Cordelia Langford, John Sillitoe on behalf of the Wellcome Sanger Institute COVID-19 Surveillance Team                                                                                                                                          |
| EPI_ISL_800864, EPI_ISL_800871                                                                                                                                                                                                                                                                                                                                                                                                                                                                                                                                                                                 | Lighthouse Lab in Milton Keynes         | Wellcome Sanger Institute for the COVID-19 Genomics UK (COG-UK) Consortium | The Lighthouse Lab in Milton Keynes and Alex Alderton, Roberto Amato, Sonia Goncalves, Ewan Harrison, David K. Jackson, Ian Johnston, Dominic Kwiatkowski, Cordelia Langford, John Sillitoe on behalf of the Wellcome Sanger Institute COVID-19 Surveillance Team                                                                                                                                                                                     |
| EPI_ISL_800874, EPI_ISL_800875                                                                                                                                                                                                                                                                                                                                                                                                                                                                                                                                                                                 | Lighthouse Lab in Glasgow               | Wellcome Sanger Institute for the COVID-19 Genomics UK (COG-UK) Consortium | Harper VanSteenhouse, Yurni Kasai, David Gray, Carol Clugston, Anna Dominiczak and Alex Alderton, Roberto Amato, Sonia Goncalves, Ewan Harrison, David K. Jackson, Ian Johnston, Dominic Kwiatkowski, Cordelia Langford, John Sillitoe on behalf of the Wellcome Sanger Institute COVID-19 Surveillance Team                                                                                                                                          |
| EPI_ISL_800878, EPI_ISL_800879                                                                                                                                                                                                                                                                                                                                                                                                                                                                                                                                                                                 | Lighthouse Lab in Milton Keynes         | Wellcome Sanger Institute for the COVID-19 Genomics UK (COG-UK) Consortium | The Lighthouse Lab in Milton Keynes and Alex Alderton, Roberto Amato, Sonia Goncalves, Ewan Harrison, David K. Jackson, Ian Johnston, Dominic Kwiatkowski, Cordelia Langford, John Sillitoe on behalf of the Wellcome Sanger Institute COVID-19 Surveillance Team                                                                                                                                                                                     |
| EPI_ISL_800880                                                                                                                                                                                                                                                                                                                                                                                                                                                                                                                                                                                                 | Lighthouse Lab in Glasgow               | Wellcome Sanger Institute for the COVID-19 Genomics UK (COG-UK) Consortium | Harper VanSteenhouse, Yurni Kasai, David Gray, Carol Clugston, Anna Dominiczak and Alex Alderton, Roberto Amato, Sonia Goncalves, Ewan Harrison, David K. Jackson, Ian Johnston, Dominic Kwiatkowski, Cordelia Langford, John Sillitoe on behalf of the Wellcome Sanger Institute COVID-19 Surveillance Team                                                                                                                                          |
| EPI_ISL_800881                                                                                                                                                                                                                                                                                                                                                                                                                                                                                                                                                                                                 | Lighthouse Lab in Milton Keynes         | Wellcome Sanger Institute for the COVID-19 Genomics UK (COG-UK) Consortium | The Lighthouse Lab in Milton Keynes and Alex Alderton, Roberto Amato, Sonia Goncalves, Ewan Harrison, David K. Jackson, Ian Johnston, Dominic Kwiatkowski, Cordelia Langford, John Sillitoe on behalf of the Wellcome Sanger Institute COVID-19 Surveillance Team                                                                                                                                                                                     |
| EPI_ISL_800882                                                                                                                                                                                                                                                                                                                                                                                                                                                                                                                                                                                                 | Lighthouse Lab in Glasgow               | Wellcome Sanger Institute for the COVID-19 Genomics UK (COG-UK) Consortium | Harper VanSteenhouse, Yurni Kasai, David Gray, Carol Clugston, Anna Dominiczak and Alex Alderton, Roberto Amato, Sonia Goncalves, Ewan Harrison, David K. Jackson, Ian Johnston, Dominic Kwiatkowski, Cordelia Langford, John Sillitoe on behalf of the Wellcome Sanger Institute COVID-19 Surveillance Team                                                                                                                                          |
| EPI_ISL_800885, EPI_ISL_800886, EPI_ISL_800890, EPI_ISL_800892, EPI_ISL_800893, EPI_ISL_800894, EPI_ISL_800895, EPI_ISL_800896, EPI_ISL_800897, EPI_ISL_800898, EPI_ISL_800899, EPI_ISL_800900, EPI_ISL_801004, EPI_ISL_801110, EPI_ISL_801111, EPI_ISL_801112, EPI_ISL_801116, EPI_ISL_801119, EPI_ISL_801121, EPI_ISL_801122, EPI_ISL_801128, EPI_ISL_801134, EPI_ISL_801143, EPI_ISL_801164                                                                                                                                                                                                                 | Lighthouse Lab in Cambridge             | Wellcome Sanger Institute for the COVID-19 Genomics UK (COG-UK) Consortium | Rao Hovav, The Lighthouse Lab in Cambridge and Alex Alderton, Roberto Amato, Sonia Goncalves, Ewan Harrison, David K. Jackson, Ian Johnston, Dominic Kwiatkowski, Cordelia Langford, John Sillitoe on behalf of the Wellcome Sanger Institute COVID-19 Surveillance Team                                                                                                                                                                              |
| EPI_ISL_801180, EPI_ISL_801181, EPI_ISL_801182, EPI_ISL_801183, EPI_ISL_801185, EPI_ISL_801186, EPI_ISL_801187, EPI_ISL_801191, EPI_ISL_801193, EPI_ISL_801196, EPI_ISL_801197, EPI_ISL_801203, EPI_ISL_801204, EPI_ISL_801206, EPI_ISL_801209, EPI_ISL_801213, EPI_ISL_801214, EPI_ISL_801215                                                                                                                                                                                                                                                                                                                 | Lighthouse Lab in Milton Keynes         | Wellcome Sanger Institute for the COVID-19 Genomics UK (COG-UK) Consortium | The Lighthouse Lab in Milton Keynes and Alex Alderton, Roberto Amato, Sonia Goncalves, Ewan Harrison, David K. Jackson, Ian Johnston, Dominic Kwiatkowski, Cordelia Langford, John Sillitoe on behalf of the Wellcome Sanger Institute COVID-19 Surveillance Team                                                                                                                                                                                     |
| EPI_ISL_801234, EPI_ISL_801238, EPI_ISL_801245, EPI_ISL_801246, EPI_ISL_801250, EPI_ISL_801251, EPI_ISL_801261, EPI_ISL_801266, EPI_ISL_801267, EPI_ISL_801269, EPI_ISL_801271, EPI_ISL_801288, EPI_ISL_801289, EPI_ISL_801291, EPI_ISL_801292, EPI_ISL_801293, EPI_ISL_801298, EPI_ISL_801299, EPI_ISL_801302, EPI_ISL_801309, EPI_ISL_801314, EPI_ISL_801315, EPI_ISL_801328, EPI_ISL_801331, EPI_ISL_801335, EPI_ISL_801336, EPI_ISL_801345, EPI_ISL_801353, EPI_ISL_801358, EPI_ISL_801363, EPI_ISL_801364, EPI_ISL_801371, EPI_ISL_801373, EPI_ISL_801378, EPI_ISL_801379, EPI_ISL_801380, EPI_ISL_801385 | Lighthouse Lab in Glasgow               | Wellcome Sanger Institute for the COVID-19 Genomics UK (COG-UK) Consortium | Harper VanSteenhouse, Yurni Kasai, David Gray, Carol Clugston, Anna Dominiczak and Alex Alderton, Roberto Amato, Sonia Goncalves, Ewan Harrison, David K. Jackson, Ian Johnston, Dominic Kwiatkowski, Cordelia Langford, John Sillitoe on behalf of the Wellcome Sanger Institute COVID-19 Surveillance Team                                                                                                                                          |
| EPI_ISL_801404, EPI_ISL_801411, EPI_ISL_801413, EPI_ISL_801416, EPI_ISL_801417, EPI_ISL_801418, EPI_ISL_801420, EPI_ISL_801428, EPI_ISL_801431, EPI_ISL_801432, EPI_ISL_801435, EPI_ISL_801452, EPI_ISL_801456, EPI_ISL_801460, EPI_ISL_801461, EPI_ISL_801462, EPI_ISL_801467, EPI_ISL_801468, EPI_ISL_801469, EPI_ISL_801482, EPI_ISL_801483, EPI_ISL_801484, EPI_ISL_801485, EPI_ISL_801486, EPI_ISL_801487, EPI_ISL_801488, EPI_ISL_801489, EPI_ISL_801491, EPI_ISL_801492, EPI_ISL_801495, EPI_ISL_801496, EPI_ISL_801497, EPI_ISL_801498, EPI_ISL_801505, EPI_ISL_801510                                 | Lighthouse Lab in Glasgow               | Wellcome Sanger Institute for the COVID-19 Genomics UK (COG-UK) Consortium | Harper VanSteenhouse, Yurni Kasai, David Gray, Carol Clugston, Anna Dominiczak and Alex Alderton, Roberto Amato, Sonia Goncalves, Ewan Harrison, David K. Jackson, Ian Johnston, Dominic Kwiatkowski, Cordelia Langford, John Sillitoe on behalf of the Wellcome Sanger Institute COVID-19 Surveillance Team                                                                                                                                          |
| EPI_ISL_801467, EPI_ISL_801468, EPI_ISL_801469, EPI_ISL_801470, EPI_ISL_801471, EPI_ISL_801486, EPI_ISL_801487, EPI_ISL_801488, EPI_ISL_801489, EPI_ISL_801491, EPI_ISL_801492, EPI_ISL_801495, EPI_ISL_801496, EPI_ISL_801497, EPI_ISL_801498, EPI_ISL_801499, EPI_ISL_801505, EPI_ISL_801510                                                                                                                                                                                                                                                                                                                 | Dutch COVID-19 response team            | Erasmus Medical Center                                                     | Bas Oude Munnink, Reina Sikerna, David Nuenhuysen, Inna Chastakova, Anne van de Linden, Maljan Stoter, Eimanuele Munger, Corine Geurtsinkse, Annemiek van der Elk, Richard Molenkamp, Marlon Koopmans, on behalf of the Dutch national COVID-19 response team.                                                                                                                                                                                        |
| EPI_ISL_801911, EPI_ISL_802176, EPI_ISL_802220, EPI_ISL_802289                                                                                                                                                                                                                                                                                                                                                                                                                                                                                                                                                 | MSHS Clinical Microbiology Laboratories | MSHS Pathogen Surveillance Program                                         | Ana S. Gonzalez-Ranche, Hala Alshamrani, Mitchell L. Sullivan, Brianna Ciferri, Aiyi Ochia, Angela Amato, Mahmood Awada, Elena Hirsch, Ashley S. Salimbenon, Levy Sonnensky, Katherine Beach, Kayla Russo, Charles Gleason, Stephanie Fedor, Giulio Kramer, Zahra Khan, Benny Albuquerque, Adriana van de Guchte, Konal Srivastava, Matthew M. Hernandez, Jayveeta Dutta, Denise Juczyszczak, Emily Ferreri, Rachel Ornela, Nancy Francoeur, Betsaida |

|                                                                                                                                                                                                                                                                                                                                                                                                                |                                                                                       |                                                                                              |                                                                                                                                                                                                                                                                                                                                            |
|----------------------------------------------------------------------------------------------------------------------------------------------------------------------------------------------------------------------------------------------------------------------------------------------------------------------------------------------------------------------------------------------------------------|---------------------------------------------------------------------------------------|----------------------------------------------------------------------------------------------|--------------------------------------------------------------------------------------------------------------------------------------------------------------------------------------------------------------------------------------------------------------------------------------------------------------------------------------------|
| EPI_ISL_802543                                                                                                                                                                                                                                                                                                                                                                                                 | Dutch COVID-19 response team                                                          | Erasmus Medical Center                                                                       |                                                                                                                                                                                                                                                                                                                                            |
| EPI_ISL_802726, EPI_ISL_802729, EPI_ISL_802731, EPI_ISL_802732, EPI_ISL_802733, EPI_ISL_802734, EPI_ISL_802735, EPI_ISL_802737, EPI_ISL_802740, EPI_ISL_802741, EPI_ISL_802742, EPI_ISL_802743, EPI_ISL_802744, EPI_ISL_802745, EPI_ISL_802747, EPI_ISL_802748, EPI_ISL_802749                                                                                                                                 | see above                                                                             | Instituto de Salud Carlos III                                                                | Salom Melo, Irina Oussenko, Gintaras Deikus, Juan Sobó, Shwetha Hara Sidhar, Ying-Chih Wang, Kaitlyn Twyman, Andrew Kasarskis, Deena R. Altman, Robert Sebri, Adolfo Garcia-Sastre, Maria Luksza, Gopi Patel, Sarah Schaefer, Melissa Gimran, Michael D. Nowak, Alberto Paniz-Mondolfi, Emilia Miaz Sordilo, Viviana Simon, Harm van Bekel |
| EPI_ISL_802750, EPI_ISL_802751, EPI_ISL_802752, EPI_ISL_802753, EPI_ISL_802754, EPI_ISL_802755, EPI_ISL_802756, EPI_ISL_802757, EPI_ISL_802758, EPI_ISL_802759, EPI_ISL_802760, EPI_ISL_802761, EPI_ISL_802762, EPI_ISL_802764, EPI_ISL_802765, EPI_ISL_802766, EPI_ISL_802767, EPI_ISL_802768, EPI_ISL_802769, EPI_ISL_802770, EPI_ISL_802771, EPI_ISL_802772, EPI_ISL_802773, EPI_ISL_802775, EPI_ISL_802776 | see above                                                                             | Instituto de Salud Carlos III                                                                | Bas Oude Munnink, Reina Sikkema, David Nieuwenhuijse, Irina Chesatukova, Anne van der Linden, Marjan Boter, Ermanuele Murger, Corine Geurtsvanakenst, Annetiek van der Eijk, Richard Moltenkamp, Marlon Koopmans, on behalf of the Dutch national COVID-19 response team.                                                                  |
| EPI_ISL_80319, EPI_ISL_803430, EPI_ISL_803851                                                                                                                                                                                                                                                                                                                                                                  | see above                                                                             | Hospital Santa Maria Nai                                                                     | Iglesias-Caballero, M, Molinero Calamita, M, González-Esguevillas, M, Camarero, S, Pozo, F, Casasa, I, Jiménez, P, Jiménez, M, Zaballos, A, Monzón, S, Varona, S, Julia, M, Cuesta, I, M, A, Marcos, Varona, S, Julia, M, Cuesta, I, J, Garcia                                                                                             |
| EPI_ISL_803897                                                                                                                                                                                                                                                                                                                                                                                                 | National Institute for Infectious Diseases, INMI, "L. Spallanzani" IRCOS              | National Institute for Infectious Diseases, INMI, "L. Spallanzani" IRCOS                     | Ighem Bouthe-den Bouabaker, Samah Trabehsi, Nisrati Ben Ateja, Maher Khirar, Alia BenKhalja, Jajla Ben Kneil, Saima Abid, Sara Ferjani, Mouna Ben Sassi, Mouna Sraier, Zaineb Hamrazou, Habiba Ben Romdhanne, Soussi Amira, Sara Charman, Haren El Jebeli, Ahmed Fakhriati, Gases Emma, Riadh Daighous, Riadh Gouider.                     |
| EPI_ISL_803900                                                                                                                                                                                                                                                                                                                                                                                                 | National Institute for Infectious Diseases, INMI, "L. Spallanzani" IRCOS              | National Institute for Infectious Diseases, INMI, "L. Spallanzani" IRCOS                     | B Bartolini, O Buera, C.E.M Gubler, M Rueda, F Messina, E Giombini, MR Capobianchi, A Di Caro                                                                                                                                                                                                                                              |
| EPI_ISL_803908                                                                                                                                                                                                                                                                                                                                                                                                 | BMP, Urban PHC                                                                        | Department of Neurovirology, National Institute of Mental Health and Neurosciences (NIMHANS) | Chitra Pattabiraman, Pramada Prasad, Risha Rashied, Anila S Desai, V Ravi                                                                                                                                                                                                                                                                  |
| EPI_ISL_803944, EPI_ISL_803953                                                                                                                                                                                                                                                                                                                                                                                 | Pathogen Genomics Center, National Institute of Infectious Diseases                   | Pathogen Genomics Center, National Institute of Infectious Diseases                          | Tsuyoshi Sekizuka, Kenaro Tokawa, Rina Tanaka, Masanori Hashino, Makoto Kuroda                                                                                                                                                                                                                                                             |
| EPI_ISL_803982                                                                                                                                                                                                                                                                                                                                                                                                 | National Public Health Laboratory, National Centre for Infectious Diseases            | National Public Health Laboratory, National Centre for Infectious Diseases                   | Tzê Minn Mak, Sophie Octavia, Zhenyang Zhou, Lin Cui, Raymond Tzê Pin Lin                                                                                                                                                                                                                                                                  |
| EPI_ISL_804098                                                                                                                                                                                                                                                                                                                                                                                                 | Israel Central Virology laboratory                                                    | Israel National Consortium for SARS-CoV-2 sequencing                                         | Neta Zuckerman, Eilat Dahan Bucris, Michal Mandelboim, Dana Barilan, Oran Erster, Tzvia Mann, Omer Munk, David A Zeevi, Assaf Rokny, Joseph Ephraim Fass, Gal Zivelski, Valenti, Mor Rubinstein, Eilat Forman, Israel Nissen, Eilat Glick-Saar, Omri Nayshool, Gideon Rechavi, Ella Mendelson, Orna Mor                                    |
| EPI_ISL_804216, EPI_ISL_804285, EPI_ISL_804286, EPI_ISL_804287, EPI_ISL_804288, EPI_ISL_804289, EPI_ISL_804290, EPI_ISL_804291, EPI_ISL_804292, EPI_ISL_804293, EPI_ISL_804361, EPI_ISL_804362, EPI_ISL_804363, EPI_ISL_804364, EPI_ISL_804366, EPI_ISL_804368                                                                                                                                                 | see above                                                                             | Respiratory Virus Unit, National Infection Service, Public Health England                    | PHE Covid Sequencing Team                                                                                                                                                                                                                                                                                                                  |
| EPI_ISL_804370, EPI_ISL_804373, EPI_ISL_804375, EPI_ISL_804377                                                                                                                                                                                                                                                                                                                                                 | CHU Purpan - Laboratoire de Virologie - Institut Fédératif de Biologie                | CHU Purpan - Laboratoire de Virologie - Institut Fédératif de Biologie                       | Latour J., Ranger N., Duois M., Carcenac R., Harter A., Boyer P., Terreaux P., Izopet J.                                                                                                                                                                                                                                                   |
| EPI_ISL_804468, EPI_ISL_804470, EPI_ISL_804473, EPI_ISL_804474, EPI_ISL_804512, EPI_ISL_804513, EPI_ISL_804518, EPI_ISL_804530, EPI_ISL_804534, EPI_ISL_804538, EPI_ISL_804547, EPI_ISL_804554, EPI_ISL_804565, EPI_ISL_804571                                                                                                                                                                                 | see above                                                                             | MEPH, Aix Marseille University<br>Hospital Comarcal de Melilla                               | Anthony LEVASSEUR<br>Iglesias-Caballero, M, Molinero Calamita, M, González-Esguevillas M, Camarero, S, Pozo, F, Casasa, I, Jiménez, P, Jiménez, M, Zaballos, A, Monzón, S, Varona, S, Julia, M, Cuesta, I, J, López                                                                                                                        |
| EPI_ISL_806731, EPI_ISL_806732                                                                                                                                                                                                                                                                                                                                                                                 | SIEP DIPARTIMENTO DI PREVENZIONE CHIETI                                               | Istituto Zooprofilattico Sperimentale dell'Abruzzo e Molise "G. Caporale"                    | Lorusso A, Maracci M, Di Domenico M, Ancora M, Curini V, Mangone I, Rinaldi A, Di Pasquale A, Cammà C, Puglia I, Calistri P, Savini G                                                                                                                                                                                                      |
| EPI_ISL_806733                                                                                                                                                                                                                                                                                                                                                                                                 | SIEP CHIETI - DRIVE IN CHIETI                                                         | Istituto Zooprofilattico Sperimentale dell'Abruzzo e Molise "G. Caporale"                    | Lorusso A, Maracci M, Di Domenico M, Ancora M, Curini V, Mangone I, Rinaldi A, Di Pasquale A, Cammà C, Puglia I, Calistri P, Savini G                                                                                                                                                                                                      |
| EPI_ISL_806734                                                                                                                                                                                                                                                                                                                                                                                                 | SIEP CHIETI - DRIVE IN LANCIANO                                                       | Istituto Zooprofilattico Sperimentale dell'Abruzzo e Molise "G. Caporale"                    | Lorusso A, Maracci M, Di Domenico M, Ancora M, Curini V, Mangone I, Rinaldi A, Di Pasquale A, Cammà C, Puglia I, Calistri P, Savini G                                                                                                                                                                                                      |
| EPI_ISL_806739                                                                                                                                                                                                                                                                                                                                                                                                 | SIEP DIPARTIMENTO DI PREVENZIONE TERAMO                                               | Istituto Zooprofilattico Sperimentale dell'Abruzzo e Molise "G. Caporale"                    | Lorusso A, Maracci M, Di Domenico M, Ancora M, Curini V, Mangone I, Rinaldi A, Di Pasquale A, Cammà C, Puglia I, Calistri P, Savini G                                                                                                                                                                                                      |
| EPI_ISL_806745                                                                                                                                                                                                                                                                                                                                                                                                 | RSA Giulianova                                                                        | Istituto Zooprofilattico Sperimentale dell'Abruzzo e Molise "G. Caporale"                    | Lorusso A, Maracci M, Di Domenico M, Ancora M, Curini V, Mangone I, Rinaldi A, Di Pasquale A, Cammà C, Puglia I, Calistri P, Savini G                                                                                                                                                                                                      |
| EPI_ISL_806747                                                                                                                                                                                                                                                                                                                                                                                                 | SIEP DIPARTIMENTO DI PREVENZIONE TERAMO                                               | Istituto Zooprofilattico Sperimentale dell'Abruzzo e Molise "G. Caporale"                    | Lorusso A, Maracci M, Di Domenico M, Ancora M, Curini V, Mangone I, Rinaldi A, Di Pasquale A, Cammà C, Puglia I, Calistri P, Savini G                                                                                                                                                                                                      |
| EPI_ISL_806749, EPI_ISL_806750, EPI_ISL_806751, EPI_ISL_806752, EPI_ISL_806753, EPI_ISL_806754, EPI_ISL_806755, EPI_ISL_806757                                                                                                                                                                                                                                                                                 | SIEP DIPARTIMENTO DI PREVENZIONE SULLMONA                                             | Istituto Zooprofilattico Sperimentale dell'Abruzzo e Molise "G. Caporale"                    | Lorusso A, Maracci M, Di Domenico M, Ancora M, Curini V, Mangone I, Rinaldi A, Di Pasquale A, Cammà C, Puglia I, Calistri P, Savini G                                                                                                                                                                                                      |
| EPI_ISL_806762                                                                                                                                                                                                                                                                                                                                                                                                 | SIEP CHIETI - DRIVE IN ORTONA                                                         | Istituto Zooprofilattico Sperimentale dell'Abruzzo e Molise "G. Caporale"                    | Lorusso A, Maracci M, Di Domenico M, Ancora M, Curini V, Mangone I, Rinaldi A, Di Pasquale A, Cammà C, Puglia I, Calistri P, Savini G                                                                                                                                                                                                      |
| EPI_ISL_806764                                                                                                                                                                                                                                                                                                                                                                                                 | DIPARTIMENTO PREVENZIONE AVEZZANO-SERVIZIO DI IGIENE EPIDEMIOLOGIA E SANITA' PUBBLICA | Istituto Zooprofilattico Sperimentale dell'Abruzzo e Molise "G. Caporale"                    | Lorusso A, Maracci M, Di Domenico M, Ancora M, Curini V, Mangone I, Rinaldi A, Di Pasquale A, Cammà C, Puglia I, Calistri P, Savini G                                                                                                                                                                                                      |
| EPI_ISL_806766, EPI_ISL_806770, EPI_ISL_806771                                                                                                                                                                                                                                                                                                                                                                 | SIEP DIPARTIMENTO DI PREVENZIONE TERAMO                                               | Istituto Zooprofilattico Sperimentale dell'Abruzzo e Molise "G. Caporale"                    | Lorusso A, Maracci M, Di Domenico M, Ancora M, Curini V, Mangone I, Rinaldi A, Di Pasquale A, Cammà C, Puglia I, Calistri P, Savini G                                                                                                                                                                                                      |
| EPI_ISL_806773, EPI_ISL_806774                                                                                                                                                                                                                                                                                                                                                                                 | Caspedale S.Salvatore-Medicina Interna L'Aquila                                       | Istituto Zooprofilattico Sperimentale dell'Abruzzo e Molise "G. Caporale"                    | Lorusso A, Maracci M, Di Domenico M, Ancora M, Curini V, Mangone I, Rinaldi A, Di Pasquale A, Cammà C, Puglia I, Calistri P, Savini G                                                                                                                                                                                                      |
| EPI_ISL_806777, EPI_ISL_806778                                                                                                                                                                                                                                                                                                                                                                                 | SIEP DIPARTIMENTO DI PREVENZIONE TERAMO                                               | Istituto Zooprofilattico Sperimentale dell'Abruzzo e Molise "G. Caporale"                    | Lorusso A, Maracci M, Di Domenico M, Ancora M, Curini V, Mangone I, Rinaldi A, Di Pasquale A, Cammà C, Puglia I, Calistri P, Savini G                                                                                                                                                                                                      |
| EPI_ISL_806781                                                                                                                                                                                                                                                                                                                                                                                                 | DIPARTIMENTO PREVENZIONE AVEZZANO-SERVIZIO DI IGIENE EPIDEMIOLOGIA E SANITA' PUBBLICA | Istituto Zooprofilattico Sperimentale dell'Abruzzo e Molise "G. Caporale"                    | Lorusso A, Maracci M, Di Domenico M, Ancora M, Curini V, Mangone I, Rinaldi A, Di Pasquale A, Cammà C, Puglia I, Calistri P, Savini G                                                                                                                                                                                                      |
| EPI_ISL_806786, EPI_ISL_806787, EPI_ISL_806788                                                                                                                                                                                                                                                                                                                                                                 | SIEP DIPARTIMENTO DI PREVENZIONE TERAMO                                               | Istituto Zooprofilattico Sperimentale dell'Abruzzo e Molise "G. Caporale"                    | Lorusso A, Maracci M, Di Domenico M, Ancora M, Curini V, Mangone I, Rinaldi A, Di Pasquale A, Cammà C, Puglia I, Calistri P, Savini G                                                                                                                                                                                                      |

|                                                                                                                                                                               |                                                                                                                                                                     |                                                                                                                                                                                                                                                                                                                                                                        |                                                                                                                                                                                                                                                                                                                    |
|-------------------------------------------------------------------------------------------------------------------------------------------------------------------------------|---------------------------------------------------------------------------------------------------------------------------------------------------------------------|------------------------------------------------------------------------------------------------------------------------------------------------------------------------------------------------------------------------------------------------------------------------------------------------------------------------------------------------------------------------|--------------------------------------------------------------------------------------------------------------------------------------------------------------------------------------------------------------------------------------------------------------------------------------------------------------------|
| EPI_ISL_806790                                                                                                                                                                | SIESP DIPARTIMENTO DI PREVENZIONE DELLAQUILA                                                                                                                        | Istituto Zooprofilattico Sperimentale dell'Abruzzo e Molise "G. Caporale"                                                                                                                                                                                                                                                                                              | Lorusso A, Marceaci M, Di Domenico M, Ancora M, Curri V, Mangone I, Rinaldi A, Di Pasquale A, Camma C, Puglia I, Calisiri P, Savini G                                                                                                                                                                              |
| EPI_ISL_806791, EPI_ISL_806792, EPI_ISL_806793, EPI_ISL_806794, EPI_ISL_806796, EPI_ISL_806797                                                                                | SIESP CHIETI - DRIVE IN ORTONA                                                                                                                                      | Istituto Zooprofilattico Sperimentale dell'Abruzzo e Molise "G. Caporale"                                                                                                                                                                                                                                                                                              | Lorusso A, Marceaci M, Di Domenico M, Ancora M, Curri V, Mangone I, Rinaldi A, Di Pasquale A, Camma C, Puglia I, Calisiri P, Savini G                                                                                                                                                                              |
| EPI_ISL_806799                                                                                                                                                                | SIESP CHIETI - DRIVE IN LANCIANO                                                                                                                                    | Istituto Zooprofilattico Sperimentale dell'Abruzzo e Molise "G. Caporale"                                                                                                                                                                                                                                                                                              | Lorusso A, Marceaci M, Di Domenico M, Ancora M, Curri V, Mangone I, Rinaldi A, Di Pasquale A, Camma C, Puglia I, Calisiri P, Savini G                                                                                                                                                                              |
| EPI_ISL_806805                                                                                                                                                                | SIESP CHIETI - DISTRETTO SANITARIO CHIETI                                                                                                                           | Istituto Zooprofilattico Sperimentale dell'Abruzzo e Molise "G. Caporale"                                                                                                                                                                                                                                                                                              | Lorusso A, Marceaci M, Di Domenico M, Ancora M, Curri V, Mangone I, Rinaldi A, Di Pasquale A, Camma C, Puglia I, Calisiri P, Savini G                                                                                                                                                                              |
| EPI_ISL_810973                                                                                                                                                                | MRCG at LSHTM Genomics lab                                                                                                                                          | MRCG at LSHTM Genomics lab                                                                                                                                                                                                                                                                                                                                             | Abdul Karim seasy, Abdouli Kanteh, Jarra Mennet, Mariana Kulabi, Bakary Sanyang                                                                                                                                                                                                                                    |
| EPI_ISL_811063, EPI_ISL_811064, EPI_ISL_811073, EPI_ISL_811077, EPI_ISL_811078, EPI_ISL_811079, EPI_ISL_811095, EPI_ISL_811100, EPI_ISL_811121                                | Respiratory Virus Unit, National Infection Service, Public Health England                                                                                           | COVID-19 Genomics UK (COG-UK) Consortium                                                                                                                                                                                                                                                                                                                               | PHE Covid Sequencing Team                                                                                                                                                                                                                                                                                          |
| EPI_ISL_811145                                                                                                                                                                | Laboratory of Microbiology, National Reference Lab, Charles Nicolle Hospital, 2-University of Tunis ElManar, Faculty of Medicine of Tunis, LR95E909, Tunis, Tunisia | Clinical and Experimental Pharmacology Lab, LR16SP02, National Center of Pharmacovigilance, University of Tunis El Manar, Tunis, Tunisia, 2-Neurodegenerative diseases and psychiatric troubles, LR185P03, Razi Hospital, University of Tunis El Manar, Tunis, Tunisia, 3- Ministry of Health, National Observatory of New and Emerging Diseases, 1006, Tunis, Tunisia | Iliem Bouiba-Ben Boulaker, Sameh Trabesli, Nissat Ben Aleya, Maher Kharrat, Ala Ben Kahla, Jallia Ben Khellil, Saima Abdi, Sara Fejjani, Mouna Ben Sassi, Mouna Safer, Awatef El Mousli, Habiba Ben Romdhane, Souissi Amira, Ines Mdini, Hanen El Jebari, Asma Fejjani, Gates Emma, Riadh Daghdous, Riadh Gaudier. |
| EPI_ISL_811282, EPI_ISL_811304                                                                                                                                                | Lighthouse Lab in Milton Keynes                                                                                                                                     | Wellcome Sanger Institute for the COVID-19 Genomics UK (COG-UK) Consortium                                                                                                                                                                                                                                                                                             | The Lighthouse Lab in Milton Keynes and Alex Alderton, Roberto Amato, Sonia Goncalves, Ewan Harrison, David K, Jackson, Ian Johnston, Dominic Kwiatkowski, Cordelia Langford, John Sillitoe on behalf of the Wellcome Sanger Institute COVID-19 Surveillance Team                                                  |
| EPI_ISL_811320, EPI_ISL_811341                                                                                                                                                | Lighthouse Lab in Glasgow                                                                                                                                           | Wellcome Sanger Institute for the COVID-19 Genomics UK (COG-UK) Consortium                                                                                                                                                                                                                                                                                             | Harper VanSteenhouse, Yurni Kasai, David Gray, Carol Clugston, Anna Dominiczak and Alex Alderton, Roberto Amato, Sonia Goncalves, Ewan Harrison, David K, Jackson, Ian Johnston, Dominic Kwiatkowski, Cordelia Langford, John Sillitoe on behalf of the Wellcome Sanger Institute COVID-19 Surveillance Team       |
| EPI_ISL_811345                                                                                                                                                                | Lighthouse Lab in Milton Keynes                                                                                                                                     | Wellcome Sanger Institute for the COVID-19 Genomics UK (COG-UK) Consortium                                                                                                                                                                                                                                                                                             | The Lighthouse Lab in Milton Keynes and Alex Alderton, Roberto Amato, Sonia Goncalves, Ewan Harrison, David K, Jackson, Ian Johnston, Dominic Kwiatkowski, Cordelia Langford, John Sillitoe on behalf of the Wellcome Sanger Institute COVID-19 Surveillance Team                                                  |
| EPI_ISL_811349, EPI_ISL_811363, EPI_ISL_811364                                                                                                                                | Lighthouse Lab in Glasgow                                                                                                                                           | Wellcome Sanger Institute for the COVID-19 Genomics UK (COG-UK) Consortium                                                                                                                                                                                                                                                                                             | Harper VanSteenhouse, Yurni Kasai, David Gray, Carol Clugston, Anna Dominiczak and Alex Alderton, Roberto Amato, Sonia Goncalves, Ewan Harrison, David K, Jackson, Ian Johnston, Dominic Kwiatkowski, Cordelia Langford, John Sillitoe on behalf of the Wellcome Sanger Institute COVID-19 Surveillance Team       |
| EPI_ISL_811366                                                                                                                                                                | Lighthouse Lab in Milton Keynes                                                                                                                                     | Wellcome Sanger Institute for the COVID-19 Genomics UK (COG-UK) Consortium                                                                                                                                                                                                                                                                                             | The Lighthouse Lab in Milton Keynes and Alex Alderton, Roberto Amato, Sonia Goncalves, Ewan Harrison, David K, Jackson, Ian Johnston, Dominic Kwiatkowski, Cordelia Langford, John Sillitoe on behalf of the Wellcome Sanger Institute COVID-19 Surveillance Team                                                  |
| EPI_ISL_811370, EPI_ISL_811375                                                                                                                                                | Lighthouse Lab in Glasgow                                                                                                                                           | Wellcome Sanger Institute for the COVID-19 Genomics UK (COG-UK) Consortium                                                                                                                                                                                                                                                                                             | Harper VanSteenhouse, Yurni Kasai, David Gray, Carol Clugston, Anna Dominiczak and Alex Alderton, Roberto Amato, Sonia Goncalves, Ewan Harrison, David K, Jackson, Ian Johnston, Dominic Kwiatkowski, Cordelia Langford, John Sillitoe on behalf of the Wellcome Sanger Institute COVID-19 Surveillance Team       |
| EPI_ISL_811377                                                                                                                                                                | Lighthouse Lab in Milton Keynes                                                                                                                                     | Wellcome Sanger Institute for the COVID-19 Genomics UK (COG-UK) Consortium                                                                                                                                                                                                                                                                                             | The Lighthouse Lab in Milton Keynes and Alex Alderton, Roberto Amato, Sonia Goncalves, Ewan Harrison, David K, Jackson, Ian Johnston, Dominic Kwiatkowski, Cordelia Langford, John Sillitoe on behalf of the Wellcome Sanger Institute COVID-19 Surveillance Team                                                  |
| EPI_ISL_811386, EPI_ISL_811390                                                                                                                                                | Lighthouse Lab in Glasgow                                                                                                                                           | Wellcome Sanger Institute for the COVID-19 Genomics UK (COG-UK) Consortium                                                                                                                                                                                                                                                                                             | Harper VanSteenhouse, Yurni Kasai, David Gray, Carol Clugston, Anna Dominiczak and Alex Alderton, Roberto Amato, Sonia Goncalves, Ewan Harrison, David K, Jackson, Ian Johnston, Dominic Kwiatkowski, Cordelia Langford, John Sillitoe on behalf of the Wellcome Sanger Institute COVID-19 Surveillance Team       |
| EPI_ISL_811392                                                                                                                                                                | Lighthouse Lab in Milton Keynes                                                                                                                                     | Wellcome Sanger Institute for the COVID-19 Genomics UK (COG-UK) Consortium                                                                                                                                                                                                                                                                                             | The Lighthouse Lab in Milton Keynes and Alex Alderton, Roberto Amato, Sonia Goncalves, Ewan Harrison, David K, Jackson, Ian Johnston, Dominic Kwiatkowski, Cordelia Langford, John Sillitoe on behalf of the Wellcome Sanger Institute COVID-19 Surveillance Team                                                  |
| EPI_ISL_811416, EPI_ISL_811418, EPI_ISL_811426, EPI_ISL_811438, EPI_ISL_811446                                                                                                | Lighthouse Lab in Glasgow                                                                                                                                           | Wellcome Sanger Institute for the COVID-19 Genomics UK (COG-UK) Consortium                                                                                                                                                                                                                                                                                             | Harper VanSteenhouse, Yurni Kasai, David Gray, Carol Clugston, Anna Dominiczak and Alex Alderton, Roberto Amato, Sonia Goncalves, Ewan Harrison, David K, Jackson, Ian Johnston, Dominic Kwiatkowski, Cordelia Langford, John Sillitoe on behalf of the Wellcome Sanger Institute COVID-19 Surveillance Team       |
| EPI_ISL_811452                                                                                                                                                                | Lighthouse Lab in Milton Keynes                                                                                                                                     | Wellcome Sanger Institute for the COVID-19 Genomics UK (COG-UK) Consortium                                                                                                                                                                                                                                                                                             | The Lighthouse Lab in Milton Keynes and Alex Alderton, Roberto Amato, Sonia Goncalves, Ewan Harrison, David K, Jackson, Ian Johnston, Dominic Kwiatkowski, Cordelia Langford, John Sillitoe on behalf of the Wellcome Sanger Institute COVID-19 Surveillance Team                                                  |
| EPI_ISL_811503, EPI_ISL_811506                                                                                                                                                | Lighthouse Lab in Cambridge                                                                                                                                         | Wellcome Sanger Institute for the COVID-19 Genomics UK (COG-UK) Consortium                                                                                                                                                                                                                                                                                             | Rob Howes, The Lighthouse Lab in Cambridge and Alex Alderton, Roberto Amato, Sonia Goncalves, Ewan Harrison, David K, Jackson, Ian Johnston, Dominic Kwiatkowski, Cordelia Langford, John Sillitoe on behalf of the Wellcome Sanger Institute COVID-19 Surveillance Team                                           |
| EPI_ISL_811511                                                                                                                                                                | Lighthouse Lab in Milton Keynes                                                                                                                                     | Wellcome Sanger Institute for the COVID-19 Genomics UK (COG-UK) Consortium                                                                                                                                                                                                                                                                                             | The Lighthouse Lab in Milton Keynes and Alex Alderton, Roberto Amato, Sonia Goncalves, Ewan Harrison, David K, Jackson, Ian Johnston, Dominic Kwiatkowski, Cordelia Langford, John Sillitoe on behalf of the Wellcome Sanger Institute COVID-19 Surveillance Team                                                  |
| EPI_ISL_811523                                                                                                                                                                | Lighthouse Lab in Cambridge                                                                                                                                         | Wellcome Sanger Institute for the COVID-19 Genomics UK (COG-UK) Consortium                                                                                                                                                                                                                                                                                             | Rob Howes, The Lighthouse Lab in Cambridge and Alex Alderton, Roberto Amato, Sonia Goncalves, Ewan Harrison, David K, Jackson, Ian Johnston, Dominic Kwiatkowski, Cordelia Langford, John Sillitoe on behalf of the Wellcome Sanger Institute COVID-19 Surveillance Team                                           |
| EPI_ISL_811549, EPI_ISL_811556                                                                                                                                                | Lighthouse Lab in Milton Keynes                                                                                                                                     | Wellcome Sanger Institute for the COVID-19 Genomics UK (COG-UK) Consortium                                                                                                                                                                                                                                                                                             | The Lighthouse Lab in Milton Keynes and Alex Alderton, Roberto Amato, Sonia Goncalves, Ewan Harrison, David K, Jackson, Ian Johnston, Dominic Kwiatkowski, Cordelia Langford, John Sillitoe on behalf of the Wellcome Sanger Institute COVID-19 Surveillance Team                                                  |
| EPI_ISL_811572, EPI_ISL_811598, EPI_ISL_811609, EPI_ISL_811614                                                                                                                | Lighthouse Lab in Cambridge                                                                                                                                         | Wellcome Sanger Institute for the COVID-19 Genomics UK (COG-UK) Consortium                                                                                                                                                                                                                                                                                             | Rob Howes, The Lighthouse Lab in Cambridge and Alex Alderton, Roberto Amato, Sonia Goncalves, Ewan Harrison, David K, Jackson, Ian Johnston, Dominic Kwiatkowski, Cordelia Langford, John Sillitoe on behalf of the Wellcome Sanger Institute COVID-19 Surveillance Team                                           |
| EPI_ISL_811703, EPI_ISL_81872, EPI_ISL_811895, EPI_ISL_811959, EPI_ISL_811978, EPI_ISL_811980, EPI_ISL_812026, EPI_ISL_812080, EPI_ISL_812097, EPI_ISL_812092, EPI_ISL_812100 | Lighthouse Lab in Milton Keynes                                                                                                                                     | Wellcome Sanger Institute for the COVID-19 Genomics UK (COG-UK) Consortium                                                                                                                                                                                                                                                                                             | The Lighthouse Lab in Milton Keynes and Alex Alderton, Roberto Amato, Sonia Goncalves, Ewan Harrison, David K, Jackson, Ian Johnston, Dominic Kwiatkowski, Cordelia Langford, John Sillitoe on behalf of the Wellcome Sanger Institute COVID-19 Surveillance Team                                                  |
| see above                                                                                                                                                                     |                                                                                                                                                                     |                                                                                                                                                                                                                                                                                                                                                                        |                                                                                                                                                                                                                                                                                                                    |
| EPI_ISL_812347                                                                                                                                                                | Area of Virology, Serology and Virology Division (SAVID), New South Wales Health Pathology Randwick                                                                 | Virology Research Laboratory, Area of Virology, Serology and Virology Division (SAVID), New South Wales Health Pathology Randwick                                                                                                                                                                                                                                      | Foster, C.; Au, J.; Ruiz Silva, M.; Devesson, I.; Bull, R.; Van Hal, S.; Rawlinson, W.                                                                                                                                                                                                                             |
| EPI_ISL_812452, EPI_ISL_812464                                                                                                                                                | Laboratorio de Referencia Nacional de Virus Respiratorios, Instituto Nacional de Salud Peru                                                                         | Laboratorio de Genomica Microbiana, Universidad Peruana Cayetano Heredia                                                                                                                                                                                                                                                                                               | Pablo Tsukayama, Alejandra Davila-Barclay, Guillermo Sakaherrera, Luis Gonzalez, Pedro E. Romero, Brenda Arzano, Janet Huanacachoque, Pool Marcos, Camila Castillo-Vicahuananti, Oscar Escalante, Priscila Lopez, Nancy Rojas                                                                                      |
| EPI_ISL_812755                                                                                                                                                                | DOHMH Morrisania                                                                                                                                                    | New York City Public Health Laboratory                                                                                                                                                                                                                                                                                                                                 | Jade Wang, et al.                                                                                                                                                                                                                                                                                                  |









|                                                                                                                                                                                                                                                                                                |                                                                                                                                  |                                          |                                                                                                                                                                                                                                                                                                                                                                                                                                                        |
|------------------------------------------------------------------------------------------------------------------------------------------------------------------------------------------------------------------------------------------------------------------------------------------------|----------------------------------------------------------------------------------------------------------------------------------|------------------------------------------|--------------------------------------------------------------------------------------------------------------------------------------------------------------------------------------------------------------------------------------------------------------------------------------------------------------------------------------------------------------------------------------------------------------------------------------------------------|
| EPI_ISL_819380, EPI_ISL_819385, EPI_ISL_819386, EPI_ISL_819389, EPI_ISL_819399                                                                                                                                                                                                                 | Queens Medical Centre, Clinical Microbiology Department / DeepSeq Nottingham                                                     | COVID-19 Genomics UK (COG-UK) Consortium | Gemma Clark, Wendy Smith, Manjinder Khakh, Vicki M Fleming, Michelle M Lister, Hannah Howson-Wells, Jonathan Ball, Patrick McCClure, Joseph Chappell, Theodoranis Tsolevidis, Nadine Holmes, Matthew Carlisle, Christopher Moore, Fei Sang, Johnny Debebe, Victoria Wright, Matthew Loose                                                                                                                                                              |
| EPI_ISL_819605, EPI_ISL_819608                                                                                                                                                                                                                                                                 | Oxford Virotics, NDM, University of Oxford, Oxford University Hospitals, Basingstoke and North Hampshire Hospital                | COVID-19 Genomics UK (COG-UK) Consortium | Tanya Goldchik, David Borsari, George MacIntyre, Amy Trebes, Manateresa de Cesare, Cairn Moore, Alex Mobbs, Anita Justice, Robert Shaw, Monique Andersson, Timothy Peo, Emma Wise, Nathan Moore, Jessica Lynch, Nick Cortes, Matilde Mori, Stephen Kidd, David Buck, John Todd, Christophe Fraser                                                                                                                                                      |
| EPI_ISL_819610, EPI_ISL_819611, EPI_ISL_819648, EPI_ISL_819650, EPI_ISL_819651                                                                                                                                                                                                                 | Queens Medical Centre, Clinical Microbiology Department / DeepSeq Nottingham                                                     | COVID-19 Genomics UK (COG-UK) Consortium | Gemma Clark, Wendy Smith, Manjinder Khakh, Vicki M Fleming, Michelle M Lister, Hannah Howson-Wells, Jonathan Ball, Patrick McCClure, Joseph Chappell, Theodoranis Tsolevidis, Nadine Holmes, Matthew Carlisle, Christopher Moore, Fei Sang, Johnny Debebe, Victoria Wright, Matthew Loose                                                                                                                                                              |
| EPI_ISL_819653, EPI_ISL_819655, EPI_ISL_819657, EPI_ISL_819661, EPI_ISL_819662, EPI_ISL_819665, EPI_ISL_819666, EPI_ISL_819667, EPI_ISL_819670, EPI_ISL_819720                                                                                                                                 | Oxford Virotics, NDM, University of Oxford, Oxford University Hospitals, Basingstoke and North Hampshire Hospital                | COVID-19 Genomics UK (COG-UK) Consortium | Tanya Goldchik, David Borsari, George MacIntyre, Amy Trebes, Manateresa de Cesare, Cairn Moore, Alex Mobbs, Anita Justice, Robert Shaw, Monique Andersson, Timothy Peo, Emma Wise, Nathan Moore, Jessica Lynch, Nick Cortes, Matilde Mori, Stephen Kidd, David Buck, John Todd, Christophe Fraser                                                                                                                                                      |
| EPI_ISL_819725, EPI_ISL_819731                                                                                                                                                                                                                                                                 | Queens Medical Centre, Clinical Microbiology Department / DeepSeq Nottingham                                                     | COVID-19 Genomics UK (COG-UK) Consortium | Gemma Clark, Wendy Smith, Manjinder Khakh, Vicki M Fleming, Michelle M Lister, Hannah Howson-Wells, Jonathan Ball, Patrick McCClure, Joseph Chappell, Theodoranis Tsolevidis, Nadine Holmes, Matthew Carlisle, Christopher Moore, Fei Sang, Johnny Debebe, Victoria Wright, Matthew Loose                                                                                                                                                              |
| EPI_ISL_819732, EPI_ISL_819735, EPI_ISL_819736, EPI_ISL_819737, EPI_ISL_819738, EPI_ISL_819739, EPI_ISL_819740, EPI_ISL_819741, EPI_ISL_819742, EPI_ISL_819744, EPI_ISL_819745, EPI_ISL_819747, EPI_ISL_819748, EPI_ISL_819749, EPI_ISL_819751, EPI_ISL_819752, EPI_ISL_819754, EPI_ISL_819755 | Oxford Virotics, NDM, University of Oxford, Oxford University Hospitals, Basingstoke and North Hampshire Hospital                | COVID-19 Genomics UK (COG-UK) Consortium | Tanya Goldchik, David Borsari, George MacIntyre, Amy Trebes, Manateresa de Cesare, Cairn Moore, Alex Mobbs, Anita Justice, Robert Shaw, Monique Andersson, Timothy Peo, Emma Wise, Nathan Moore, Jessica Lynch, Nick Cortes, Matilde Mori, Stephen Kidd, David Buck, John Todd, Christophe Fraser                                                                                                                                                      |
| EPI_ISL_819736                                                                                                                                                                                                                                                                                 | see above                                                                                                                        | COVID-19 Genomics UK (COG-UK) Consortium | Tanya Goldchik, David Borsari, George MacIntyre, Amy Trebes, Manateresa de Cesare, Cairn Moore, Alex Mobbs, Anita Justice, Robert Shaw, Monique Andersson, Timothy Peo, Emma Wise, Nathan Moore, Jessica Lynch, Nick Cortes, Matilde Mori, Stephen Kidd, David Buck, John Todd, Christophe Fraser                                                                                                                                                      |
| EPI_ISL_819739                                                                                                                                                                                                                                                                                 | Queens Medical Centre, Clinical Microbiology Department / DeepSeq Nottingham                                                     | COVID-19 Genomics UK (COG-UK) Consortium | Gemma Clark, Wendy Smith, Manjinder Khakh, Vicki M Fleming, Michelle M Lister, Hannah Howson-Wells, Jonathan Ball, Patrick McCClure, Joseph Chappell, Theodoranis Tsolevidis, Nadine Holmes, Matthew Carlisle, Christopher Moore, Fei Sang, Johnny Debebe, Victoria Wright, Matthew Loose                                                                                                                                                              |
| EPI_ISL_819804, EPI_ISL_819805, EPI_ISL_819807, EPI_ISL_819814, EPI_ISL_819815, EPI_ISL_819816, EPI_ISL_819818                                                                                                                                                                                 | Oxford Virotics, NDM, University of Oxford, Oxford University Hospitals, Basingstoke and North Hampshire Hospital                | COVID-19 Genomics UK (COG-UK) Consortium | Tanya Goldchik, David Borsari, George MacIntyre, Amy Trebes, Manateresa de Cesare, Cairn Moore, Alex Mobbs, Anita Justice, Robert Shaw, Monique Andersson, Timothy Peo, Emma Wise, Nathan Moore, Jessica Lynch, Nick Cortes, Matilde Mori, Stephen Kidd, David Buck, John Todd, Christophe Fraser                                                                                                                                                      |
| EPI_ISL_819821, EPI_ISL_819829, EPI_ISL_819831                                                                                                                                                                                                                                                 | Queens Medical Centre, Clinical Microbiology Department / DeepSeq Nottingham                                                     | COVID-19 Genomics UK (COG-UK) Consortium | Gemma Clark, Wendy Smith, Manjinder Khakh, Vicki M Fleming, Michelle M Lister, Hannah Howson-Wells, Jonathan Ball, Patrick McCClure, Joseph Chappell, Theodoranis Tsolevidis, Nadine Holmes, Matthew Carlisle, Christopher Moore, Fei Sang, Johnny Debebe, Victoria Wright, Matthew Loose                                                                                                                                                              |
| EPI_ISL_819835, EPI_ISL_819839, EPI_ISL_819841, EPI_ISL_819843, EPI_ISL_819846, EPI_ISL_819848, EPI_ISL_819849, EPI_ISL_819868, EPI_ISL_819869, EPI_ISL_819870, EPI_ISL_819871, EPI_ISL_819872                                                                                                 | Oxford Virotics, NDM, University of Oxford, Oxford University Hospitals, Basingstoke and North Hampshire Hospital                | COVID-19 Genomics UK (COG-UK) Consortium | Tanya Goldchik, David Borsari, George MacIntyre, Amy Trebes, Manateresa de Cesare, Cairn Moore, Alex Mobbs, Anita Justice, Robert Shaw, Monique Andersson, Timothy Peo, Emma Wise, Nathan Moore, Jessica Lynch, Nick Cortes, Matilde Mori, Stephen Kidd, David Buck, John Todd, Christophe Fraser                                                                                                                                                      |
| EPI_ISL_819882, EPI_ISL_819883                                                                                                                                                                                                                                                                 | University College London, Great Ormond Street Hospital for Children NHS Foundation Trust, Imperial College Healthcare NHS Trust | COVID-19 Genomics UK (COG-UK) Consortium | Sergio Castellano, Rachel Williams, Mark Kristiansen, Paola Resende Silva, Surando Roy, Tony Brooks, Helena Tullii, Paola Niola, Patricia Dyal, Charlotte Williams, Leysa Forrest, Yasmin Panchbhaya, Jacqueline Findlay, Samuel Weeks, Julianne Brown, Kathryn Harris, Paul Handell, James Price, Alison OGrady                                                                                                                                       |
| EPI_ISL_819891                                                                                                                                                                                                                                                                                 | Quadram Institute Bioscience                                                                                                     | COVID-19 Genomics UK (COG-UK) Consortium | Dave J Baker, Gemma L Kay, Alp Aydin, Thanh Le-Viet, Steven Rudder, Ara P. Tedim, Anastasia Kolyva, Maria Diaz, Leonardo de Oliveira Martins, Nabil-Fareed Alkhan, Lizzie Meadows, Rachael Stanley, Ngozi Elnunogo, Muhammad Yasir, Nicholas M. Thomson, Alexander J Trotter, Rachel Gilroy, Samuel Bloomfield, Claire Stuart, Andrew Bell, Reemesh Prakash, Samir Dervisovic, Alison E. Mahner, John Wain, Mark Webber, Andrew J. Page, Justin OGrady |
| EPI_ISL_819892, EPI_ISL_819893                                                                                                                                                                                                                                                                 | University College London, Great Ormond Street Hospital for Children NHS Foundation Trust, Imperial College Healthcare NHS Trust | COVID-19 Genomics UK (COG-UK) Consortium | Sergio Castellano, Rachel Williams, Mark Kristiansen, Paola Resende Silva, Surando Roy, Tony Brooks, Helena Tullii, Paola Niola, Patricia Dyal, Charlotte Williams, Leysa Forrest, Yasmin Panchbhaya, Jacqueline Findlay, Samuel Weeks, Julianne Brown, Kathryn Harris, Paul Handell, James Price, Alison OGrady                                                                                                                                       |
| EPI_ISL_819928                                                                                                                                                                                                                                                                                 | Quadram Institute Bioscience                                                                                                     | COVID-19 Genomics UK (COG-UK) Consortium | Dave J Baker, Gemma L Kay, Alp Aydin, Thanh Le-Viet, Steven Rudder, Ara P. Tedim, Anastasia Kolyva, Maria Diaz, Leonardo de Oliveira Martins, Nabil-Fareed Alkhan, Lizzie Meadows, Rachael Stanley, Ngozi Elnunogo, Muhammad Yasir, Nicholas M. Thomson, Alexander J Trotter, Rachel Gilroy, Samuel Bloomfield, Claire Stuart, Andrew Bell, Reemesh Prakash, Samir Dervisovic, Alison E. Mahner, John Wain, Mark Webber, Andrew J. Page, Justin OGrady |
| EPI_ISL_819940                                                                                                                                                                                                                                                                                 | University College London, Great Ormond Street Hospital for Children NHS Foundation Trust, Imperial College Healthcare NHS Trust | COVID-19 Genomics UK (COG-UK) Consortium | Sergio Castellano, Rachel Williams, Mark Kristiansen, Paola Resende Silva, Surando Roy, Tony Brooks, Helena Tullii, Paola Niola, Patricia Dyal, Charlotte Williams, Leysa Forrest, Yasmin Panchbhaya, Jacqueline Findlay, Samuel Weeks, Julianne Brown, Kathryn Harris, Paul Handell, James Price, Alison OGrady                                                                                                                                       |
| EPI_ISL_819945                                                                                                                                                                                                                                                                                 | Quadram Institute Bioscience                                                                                                     | COVID-19 Genomics UK (COG-UK) Consortium | Dave J Baker, Gemma L Kay, Alp Aydin, Thanh Le-Viet, Steven Rudder, Ara P. Tedim, Anastasia Kolyva, Maria Diaz, Leonardo de Oliveira Martins, Nabil-Fareed Alkhan, Lizzie Meadows, Rachael Stanley, Ngozi Elnunogo, Muhammad Yasir, Nicholas M. Thomson, Alexander J Trotter, Rachel Gilroy, Samuel Bloomfield, Claire Stuart, Andrew Bell, Reemesh Prakash, Samir Dervisovic, Alison E. Mahner, John Wain, Mark Webber, Andrew J. Page, Justin OGrady |
| EPI_ISL_819957                                                                                                                                                                                                                                                                                 | University College London, Great Ormond Street Hospital for Children NHS Foundation Trust, Imperial College Healthcare NHS Trust | COVID-19 Genomics UK (COG-UK) Consortium | Sergio Castellano, Rachel Williams, Mark Kristiansen, Paola Resende Silva, Surando Roy, Tony Brooks, Helena Tullii, Paola Niola, Patricia Dyal, Charlotte Williams, Leysa Forrest, Yasmin Panchbhaya, Jacqueline Findlay, Samuel Weeks, Julianne Brown, Kathryn Harris, Paul Handell, James Price, Alison OGrady                                                                                                                                       |
| EPI_ISL_819960, EPI_ISL_819963                                                                                                                                                                                                                                                                 | Quadram Institute Bioscience                                                                                                     | COVID-19 Genomics UK (COG-UK) Consortium | Dave J Baker, Gemma L Kay, Alp Aydin, Thanh Le-Viet, Steven Rudder, Ara P. Tedim, Anastasia Kolyva, Maria Diaz, Leonardo de Oliveira Martins, Nabil-Fareed Alkhan, Lizzie Meadows, Rachael Stanley, Ngozi Elnunogo, Muhammad Yasir, Nicholas M. Thomson, Alexander J Trotter, Rachel Gilroy, Samuel Bloomfield, Claire Stuart, Andrew Bell, Reemesh Prakash, Samir Dervisovic, Alison E. Mahner, John Wain, Mark Webber, Andrew J. Page, Justin OGrady |
| EPI_ISL_819967                                                                                                                                                                                                                                                                                 | University College London, Great Ormond Street Hospital for Children NHS Foundation Trust, Imperial College Healthcare NHS Trust | COVID-19 Genomics UK (COG-UK) Consortium | Sergio Castellano, Rachel Williams, Mark Kristiansen, Paola Resende Silva, Surando Roy, Tony Brooks, Helena Tullii, Paola Niola, Patricia Dyal, Charlotte Williams, Leysa Forrest, Yasmin Panchbhaya, Jacqueline Findlay, Samuel Weeks, Julianne Brown, Kathryn Harris, Paul Handell, James Price, Alison OGrady                                                                                                                                       |
| EPI_ISL_820001, EPI_ISL_820003, EPI_ISL_820004, EPI_ISL_820005                                                                                                                                                                                                                                 | Quadram Institute Bioscience                                                                                                     | COVID-19 Genomics UK (COG-UK) Consortium | Dave J Baker, Gemma L Kay, Alp Aydin, Thanh Le-Viet, Steven Rudder, Ara P. Tedim, Anastasia Kolyva, Maria Diaz, Leonardo de Oliveira Martins, Nabil-Fareed Alkhan, Lizzie Meadows, Rachael Stanley, Ngozi Elnunogo, Muhammad Yasir, Nicholas M. Thomson, Alexander J Trotter, Rachel Gilroy, Samuel Bloomfield, Claire Stuart, Andrew Bell, Reemesh Prakash, Samir Dervisovic, Alison E. Mahner, John Wain, Mark Webber, Andrew J. Page, Justin OGrady |

|                                                                |                                                                                                                                  |                                                                                                                                                        |                                                                                                                                                                                                                                                                                                                                                                                                                                                                                                                                                                                                                  |
|----------------------------------------------------------------|----------------------------------------------------------------------------------------------------------------------------------|--------------------------------------------------------------------------------------------------------------------------------------------------------|------------------------------------------------------------------------------------------------------------------------------------------------------------------------------------------------------------------------------------------------------------------------------------------------------------------------------------------------------------------------------------------------------------------------------------------------------------------------------------------------------------------------------------------------------------------------------------------------------------------|
| EPI_ISL_820006                                                 | Queens Medical Centre, Clinical Microbiology Department / DeepSeq Nottingham                                                     | COVID-19 Genomics UK (COG-UK) Consortium                                                                                                               | Gemma Clark, Wendy Smith, Marjinder Khakh, Vicki M Fleming, Michelle M Lister, Hannah Howson-Wells, Jonathan Ball, Patrick McCulloch, Joseph Chappell, Theochanis Tselofris, Nadine Holmes, Matthew Carlisle, Christopher Moore, Fai Sang, Johnny Debebe, Victoria Wright, Matthew Loose                                                                                                                                                                                                                                                                                                                         |
| EPI_ISL_820012, EPI_ISL_820019, EPI_ISL_820036, EPI_ISL_820039 | University College London, Great Ormond Street Hospital for Children NHS Foundation Trust, Imperial College Healthcare NHS Trust | COVID-19 Genomics UK (COG-UK) Consortium                                                                                                               | Sergi Castellano, Rachel Williams, Mark Kristiansen, Paola Resende Silva, Surando Roy, Tony Brooks, Helena Tullil, Paola Nola, Patricia Dyal, Charlotte Williams, Leysa Forrest, Yasmin Parochbaya, Jacqueline Findlay, Samuel Weeks, Julienne Brown, Kathryn Harris, Paul Randal, James Price, Alison Holmes, Judith Breuer                                                                                                                                                                                                                                                                                     |
| EPI_ISL_820041, EPI_ISL_820043                                 | Quadrant Institute Bioscience                                                                                                    | COVID-19 Genomics UK (COG-UK) Consortium                                                                                                               | Dave J. Baker, Gemma L. Kay, Alp Aydin, Thanh Le-Viet, Steven Rudder, Ara P. Tedim, Anastasia Kolyva, Maria Diaz, Leonardo de Oliveira Martins, Nabil-Fareed Alkhran, Lizzie Meadows, Rachael Stanley, Ngzot Elnurgo, Muhammed Yasar, Nicholas M. Thomson, Alexander J. Trotter, Rachel Gilroy, Samuel Bloomfield, Claire Stuart, Andrew Bell, Reemesh Prakash, Samir Dervisevic, Alison E. Mahner, John Wann, Mark Webber, Andrew J. Page, Justin O'Grady                                                                                                                                                       |
| EPI_ISL_820059                                                 | University College London, Great Ormond Street Hospital for Children NHS Foundation Trust, Imperial College Healthcare NHS Trust | COVID-19 Genomics UK (COG-UK) Consortium                                                                                                               | Sergi Castellano, Rachel Williams, Mark Kristiansen, Paola Resende Silva, Surando Roy, Tony Brooks, Helena Tullil, Paola Nola, Patricia Dyal, Charlotte Williams, Leysa Forrest, Yasmin Parochbaya, Jacqueline Findlay, Samuel Weeks, Julienne Brown, Kathryn Harris, Paul Randal, James Price, Alison Holmes, Judith Breuer                                                                                                                                                                                                                                                                                     |
| EPI_ISL_820062, EPI_ISL_820066                                 | Quadrant Institute Bioscience                                                                                                    | COVID-19 Genomics UK (COG-UK) Consortium                                                                                                               | Dave J. Baker, Gemma L. Kay, Alp Aydin, Thanh Le-Viet, Steven Rudder, Ara P. Tedim, Anastasia Kolyva, Maria Diaz, Leonardo de Oliveira Martins, Nabil-Fareed Alkhran, Lizzie Meadows, Rachael Stanley, Ngzot Elnurgo, Muhammed Yasar, Nicholas M. Thomson, Alexander J. Trotter, Rachel Gilroy, Samuel Bloomfield, Claire Stuart, Andrew Bell, Reemesh Prakash, Samir Dervisevic, Alison E. Mahner, John Wann, Mark Webber, Andrew J. Page, Justin O'Grady                                                                                                                                                       |
| EPI_ISL_820101                                                 | University College London, Great Ormond Street Hospital for Children NHS Foundation Trust, Imperial College Healthcare NHS Trust | COVID-19 Genomics UK (COG-UK) Consortium                                                                                                               | Sergi Castellano, Rachel Williams, Mark Kristiansen, Paola Resende Silva, Surando Roy, Tony Brooks, Helena Tullil, Paola Nola, Patricia Dyal, Charlotte Williams, Leysa Forrest, Yasmin Parochbaya, Jacqueline Findlay, Samuel Weeks, Julienne Brown, Kathryn Harris, Paul Randal, James Price, Alison Holmes, Judith Breuer                                                                                                                                                                                                                                                                                     |
| EPI_ISL_820104, EPI_ISL_820105, EPI_ISL_820107                 | Quadrant Institute Bioscience                                                                                                    | COVID-19 Genomics UK (COG-UK) Consortium                                                                                                               | Dave J. Baker, Gemma L. Kay, Alp Aydin, Thanh Le-Viet, Steven Rudder, Ara P. Tedim, Anastasia Kolyva, Maria Diaz, Leonardo de Oliveira Martins, Nabil-Fareed Alkhran, Lizzie Meadows, Rachael Stanley, Ngzot Elnurgo, Muhammed Yasar, Nicholas M. Thomson, Alexander J. Trotter, Rachel Gilroy, Samuel Bloomfield, Claire Stuart, Andrew Bell, Reemesh Prakash, Samir Dervisevic, Alison E. Mahner, John Wann, Mark Webber, Andrew J. Page, Justin O'Grady                                                                                                                                                       |
| EPI_ISL_820118, EPI_ISL_820123, EPI_ISL_820128                 | University College London, Great Ormond Street Hospital for Children NHS Foundation Trust, Imperial College Healthcare NHS Trust | COVID-19 Genomics UK (COG-UK) Consortium                                                                                                               | Sergi Castellano, Rachel Williams, Mark Kristiansen, Paola Resende Silva, Surando Roy, Tony Brooks, Helena Tullil, Paola Nola, Patricia Dyal, Charlotte Williams, Leysa Forrest, Yasmin Parochbaya, Jacqueline Findlay, Samuel Weeks, Julienne Brown, Kathryn Harris, Paul Randal, James Price, Alison Holmes, Judith Breuer                                                                                                                                                                                                                                                                                     |
| EPI_ISL_820134                                                 | Quadrant Institute Bioscience                                                                                                    | COVID-19 Genomics UK (COG-UK) Consortium                                                                                                               | Dave J. Baker, Gemma L. Kay, Alp Aydin, Thanh Le-Viet, Steven Rudder, Ara P. Tedim, Anastasia Kolyva, Maria Diaz, Leonardo de Oliveira Martins, Nabil-Fareed Alkhran, Lizzie Meadows, Rachael Stanley, Ngzot Elnurgo, Muhammed Yasar, Nicholas M. Thomson, Alexander J. Trotter, Rachel Gilroy, Samuel Bloomfield, Claire Stuart, Andrew Bell, Reemesh Prakash, Samir Dervisevic, Alison E. Mahner, John Wann, Mark Webber, Andrew J. Page, Justin O'Grady                                                                                                                                                       |
| EPI_ISL_820143, EPI_ISL_820168                                 | Lighthouse Lab in Alderley Park                                                                                                  | Welcome Sanger Institute for the COVID-19 Genomics UK (COG-UK) Consortium                                                                              | Jacquelyn Wynn, Mairead Hyland, The Lighthouse Lab in Alderley Park and Alex Alderton, Roberto Amato, Sonia Goncalves, Ewan Harrison, David K. Jackson, Ian Johnston, Dominic Kwiatkowski, Cordelia Langford, John Sillito on behalf of the Wellcome Sanger Institute COVID-19 Surveillance Team                                                                                                                                                                                                                                                                                                                 |
| EPI_ISL_820182                                                 | Lighthouse Lab in Glasgow                                                                                                        | Welcome Sanger Institute for the COVID-19 Genomics UK (COG-UK) Consortium                                                                              | Harper VanSteenuhouse, Yurni Kasai, David Gray, Carol Clugston, Anna Dominiczak and Alex Alderton, Roberto Amato, Sonia Goncalves, Ewan Harrison, David K. Jackson, Ian Johnston, Dominic Kwiatkowski, Cordelia Langford, John Sillito on behalf of the Wellcome Sanger Institute COVID-19 Surveillance Team                                                                                                                                                                                                                                                                                                     |
| EPI_ISL_820194, EPI_ISL_820224                                 | Lighthouse Lab in Alderley Park                                                                                                  | Welcome Sanger Institute for the COVID-19 Genomics UK (COG-UK) Consortium                                                                              | Jacquelyn Wynn, Mairead Hyland, The Lighthouse Lab in Alderley Park and Alex Alderton, Roberto Amato, Sonia Goncalves, Ewan Harrison, David K. Jackson, Ian Johnston, Dominic Kwiatkowski, Cordelia Langford, John Sillito on behalf of the Wellcome Sanger Institute COVID-19 Surveillance Team                                                                                                                                                                                                                                                                                                                 |
| EPI_ISL_820241, EPI_ISL_820244                                 | Quadrant Institute Bioscience                                                                                                    | COVID-19 Genomics UK (COG-UK) Consortium                                                                                                               | Dave J. Baker, Gemma L. Kay, Alp Aydin, Thanh Le-Viet, Steven Rudder, Ara P. Tedim, Anastasia Kolyva, Maria Diaz, Leonardo de Oliveira Martins, Nabil-Fareed Alkhran, Lizzie Meadows, Rachael Stanley, Ngzot Elnurgo, Muhammed Yasar, Nicholas M. Thomson, Alexander J. Trotter, Rachel Gilroy, Samuel Bloomfield, Claire Stuart, Andrew Bell, Reemesh Prakash, Samir Dervisevic, Alison E. Mahner, John Wann, Mark Webber, Andrew J. Page, Justin O'Grady                                                                                                                                                       |
| EPI_ISL_820250, EPI_ISL_820252, EPI_ISL_820254, EPI_ISL_820262 | Lighthouse Lab in Alderley Park<br>Lighthouse Lab in Glasgow                                                                     | Welcome Sanger Institute for the COVID-19 Genomics UK (COG-UK) Consortium<br>Welcome Sanger Institute for the COVID-19 Genomics UK (COG-UK) Consortium | Jacquelyn Wynn, Mairead Hyland, The Lighthouse Lab in Alderley Park and Alex Alderton, Roberto Amato, Sonia Goncalves, Ewan Harrison, David K. Jackson, Ian Johnston, Dominic Kwiatkowski, Cordelia Langford, John Sillito on behalf of the Wellcome Sanger Institute COVID-19 Surveillance Team<br>Harper VanSteenuhouse, Yurni Kasai, David Gray, Carol Clugston, Anna Dominiczak and Alex Alderton, Roberto Amato, Sonia Goncalves, Ewan Harrison, David K. Jackson, Ian Johnston, Dominic Kwiatkowski, Cordelia Langford, John Sillito on behalf of the Wellcome Sanger Institute COVID-19 Surveillance Team |
| EPI_ISL_820271, EPI_ISL_820282                                 | University College London, Great Ormond Street Hospital for Children NHS Foundation Trust, Imperial College Healthcare NHS Trust | COVID-19 Genomics UK (COG-UK) Consortium                                                                                                               | Sergi Castellano, Rachel Williams, Mark Kristiansen, Paola Resende Silva, Surando Roy, Tony Brooks, Helena Tullil, Paola Nola, Patricia Dyal, Charlotte Williams, Leysa Forrest, Yasmin Parochbaya, Jacqueline Findlay, Samuel Weeks, Julienne Brown, Kathryn Harris, Paul Randal, James Price, Alison Holmes, Judith Breuer                                                                                                                                                                                                                                                                                     |
| EPI_ISL_820284                                                 | Quadrant Institute Bioscience                                                                                                    | COVID-19 Genomics UK (COG-UK) Consortium                                                                                                               | Dave J. Baker, Gemma L. Kay, Alp Aydin, Thanh Le-Viet, Steven Rudder, Ara P. Tedim, Anastasia Kolyva, Maria Diaz, Leonardo de Oliveira Martins, Nabil-Fareed Alkhran, Lizzie Meadows, Rachael Stanley, Ngzot Elnurgo, Muhammed Yasar, Nicholas M. Thomson, Alexander J. Trotter, Rachel Gilroy, Samuel Bloomfield, Claire Stuart, Andrew Bell, Reemesh Prakash, Samir Dervisevic, Alison E. Mahner, John Wann, Mark Webber, Andrew J. Page, Justin O'Grady                                                                                                                                                       |
| EPI_ISL_820286                                                 | Lighthouse Lab in Alderley Park                                                                                                  | Welcome Sanger Institute for the COVID-19 Genomics UK (COG-UK) Consortium                                                                              | Jacquelyn Wynn, Mairead Hyland, The Lighthouse Lab in Alderley Park and Alex Alderton, Roberto Amato, Sonia Goncalves, Ewan Harrison, David K. Jackson, Ian Johnston, Dominic Kwiatkowski, Cordelia Langford, John Sillito on behalf of the Wellcome Sanger Institute COVID-19 Surveillance Team                                                                                                                                                                                                                                                                                                                 |
| EPI_ISL_820295                                                 | Lighthouse Lab in Glasgow                                                                                                        | Welcome Sanger Institute for the COVID-19 Genomics UK (COG-UK) Consortium                                                                              | Harper VanSteenuhouse, Yurni Kasai, David Gray, Carol Clugston, Anna Dominiczak and Alex Alderton, Roberto Amato, Sonia Goncalves, Ewan Harrison, David K. Jackson, Ian Johnston, Dominic Kwiatkowski, Cordelia Langford, John Sillito on behalf of the Wellcome Sanger Institute COVID-19 Surveillance Team                                                                                                                                                                                                                                                                                                     |
| EPI_ISL_820296, EPI_ISL_820305, EPI_ISL_820307, EPI_ISL_820308 | Lighthouse Lab in Alderley Park                                                                                                  | Welcome Sanger Institute for the COVID-19 Genomics UK (COG-UK) Consortium                                                                              | Jacquelyn Wynn, Mairead Hyland, The Lighthouse Lab in Alderley Park and Alex Alderton, Roberto Amato, Sonia Goncalves, Ewan Harrison, David K. Jackson, Ian Johnston, Dominic Kwiatkowski, Cordelia Langford, John Sillito on behalf of the Wellcome Sanger Institute COVID-19 Surveillance Team                                                                                                                                                                                                                                                                                                                 |
| EPI_ISL_820323                                                 | Quadrant Institute Bioscience                                                                                                    | COVID-19 Genomics UK (COG-UK) Consortium                                                                                                               | Dave J. Baker, Gemma L. Kay, Alp Aydin, Thanh Le-Viet, Steven Rudder, Ara P. Tedim, Anastasia Kolyva, Maria Diaz, Leonardo de Oliveira Martins, Nabil-Fareed Alkhran, Lizzie Meadows, Rachael Stanley, Ngzot Elnurgo, Muhammed Yasar, Nicholas M. Thomson, Alexander J. Trotter, Rachel Gilroy, Samuel Bloomfield, Claire Stuart, Andrew Bell, Reemesh Prakash, Samir Dervisevic, Alison E. Mahner, John Wann, Mark Webber, Andrew J. Page, Justin O'Grady                                                                                                                                                       |
| EPI_ISL_820329, EPI_ISL_820330                                 | Lighthouse Lab in Alderley Park                                                                                                  | Welcome Sanger Institute for the COVID-19 Genomics UK (COG-UK) Consortium                                                                              | Jacquelyn Wynn, Mairead Hyland, The Lighthouse Lab in Alderley Park and Alex Alderton, Roberto Amato, Sonia Goncalves, Ewan Harrison, David K. Jackson, Ian Johnston, Dominic Kwiatkowski, Cordelia Langford, John Sillito on behalf of the Wellcome Sanger Institute COVID-19 Surveillance Team                                                                                                                                                                                                                                                                                                                 |
| EPI_ISL_820331                                                 | University College London, Great Ormond Street Hospital for Children NHS Foundation Trust, Imperial College Healthcare NHS Trust | COVID-19 Genomics UK (COG-UK) Consortium                                                                                                               | Sergi Castellano, Rachel Williams, Mark Kristiansen, Paola Resende Silva, Surando Roy, Tony Brooks, Helena Tullil, Paola Nola, Patricia Dyal, Charlotte Williams, Leysa Forrest, Yasmin Parochbaya, Jacqueline Findlay, Samuel Weeks, Julienne Brown, Kathryn Harris, Paul Randal, James Price, Alison Holmes, Judith Breuer                                                                                                                                                                                                                                                                                     |
| EPI_ISL_820336, EPI_ISL_820344                                 | Lighthouse Lab in Alderley Park                                                                                                  | Welcome Sanger Institute for the COVID-19 Genomics UK (COG-UK) Consortium                                                                              | Jacquelyn Wynn, Mairead Hyland, The Lighthouse Lab in Alderley Park and Alex Alderton, Roberto Amato, Sonia Goncalves, Ewan Harrison, David K. Jackson, Ian Johnston, Dominic Kwiatkowski, Cordelia Langford, John Sillito on behalf of the Wellcome Sanger Institute COVID-19 Surveillance Team                                                                                                                                                                                                                                                                                                                 |
| EPI_ISL_820349, EPI_ISL_820356                                 | Lighthouse Lab in Glasgow                                                                                                        | Welcome Sanger Institute for the COVID-19 Genomics UK (COG-UK) Consortium                                                                              | Harper VanSteenuhouse, Yurni Kasai, David Gray, Carol Clugston, Anna Dominiczak and Alex Alderton, Roberto Amato, Sonia Goncalves, Ewan Harrison, David K. Jackson, Ian Johnston, Dominic Kwiatkowski, Cordelia Langford, John Sillito on behalf of the Wellcome Sanger Institute COVID-19 Surveillance Team                                                                                                                                                                                                                                                                                                     |
| EPI_ISL_820361                                                 | Lighthouse Lab in Alderley Park                                                                                                  | Welcome Sanger Institute for the COVID-19 Genomics UK (COG-UK) Consortium                                                                              | Jacquelyn Wynn, Mairead Hyland, The Lighthouse Lab in Alderley Park and Alex Alderton, Roberto Amato, Sonia Goncalves, Ewan Harrison, David K. Jackson, Ian Johnston, Dominic Kwiatkowski, Cordelia Langford, John Sillito on behalf of the Wellcome Sanger Institute COVID-19 Surveillance Team                                                                                                                                                                                                                                                                                                                 |

















|                                                                                                                                                                                                                                                                                                                                                                                                                                                                                                                                                                                                                                                                                                                                                                                                                                                                                                                                                                                                                                                                                                                                                                                                                                                                                                                                                                                                                                                                                                                                                                                                                |           |                                                                                                                                                                                                                                                                                                                |                                                                            |                                                                                                                                                                                                                                                                                                   |                                                                                                                                                   |
|----------------------------------------------------------------------------------------------------------------------------------------------------------------------------------------------------------------------------------------------------------------------------------------------------------------------------------------------------------------------------------------------------------------------------------------------------------------------------------------------------------------------------------------------------------------------------------------------------------------------------------------------------------------------------------------------------------------------------------------------------------------------------------------------------------------------------------------------------------------------------------------------------------------------------------------------------------------------------------------------------------------------------------------------------------------------------------------------------------------------------------------------------------------------------------------------------------------------------------------------------------------------------------------------------------------------------------------------------------------------------------------------------------------------------------------------------------------------------------------------------------------------------------------------------------------------------------------------------------------|-----------|----------------------------------------------------------------------------------------------------------------------------------------------------------------------------------------------------------------------------------------------------------------------------------------------------------------|----------------------------------------------------------------------------|---------------------------------------------------------------------------------------------------------------------------------------------------------------------------------------------------------------------------------------------------------------------------------------------------|---------------------------------------------------------------------------------------------------------------------------------------------------|
| EP1_ISL_833289                                                                                                                                                                                                                                                                                                                                                                                                                                                                                                                                                                                                                                                                                                                                                                                                                                                                                                                                                                                                                                                                                                                                                                                                                                                                                                                                                                                                                                                                                                                                                                                                 |           | DIPARTIMENTO PREVENZIONE AVEZZANO SERVIZIO DI IGIENE EPIDEMIOLOGIA E SANITA PUBBLICA                                                                                                                                                                                                                           |                                                                            | Istituto Zooprofilattico Sperimentale dell'Abruzzo e Molise "G. Caporale"                                                                                                                                                                                                                         | Lorusso A., Maracci M., Di Domenico M., Ancora M., Curini V., Mangone I., Rinaldi A., Di Pasquale A., Cammà C., Puglia I., Calistri P., Savini G. |
| EP1_ISL_833291                                                                                                                                                                                                                                                                                                                                                                                                                                                                                                                                                                                                                                                                                                                                                                                                                                                                                                                                                                                                                                                                                                                                                                                                                                                                                                                                                                                                                                                                                                                                                                                                 |           | SIESP DIPARTIMENTO DI PREVENZIONE DELL'AQUILA                                                                                                                                                                                                                                                                  |                                                                            | Istituto Zooprofilattico Sperimentale dell'Abruzzo e Molise "G. Caporale"                                                                                                                                                                                                                         | Lorusso A., Maracci M., Di Domenico M., Ancora M., Curini V., Mangone I., Rinaldi A., Di Pasquale A., Cammà C., Puglia I., Calistri P., Savini G. |
| EP1_ISL_833295, EP1_ISL_833296                                                                                                                                                                                                                                                                                                                                                                                                                                                                                                                                                                                                                                                                                                                                                                                                                                                                                                                                                                                                                                                                                                                                                                                                                                                                                                                                                                                                                                                                                                                                                                                 |           | SIESP DIPARTIMENTO DI PREVENZIONE TERAMO                                                                                                                                                                                                                                                                       |                                                                            | Istituto Zooprofilattico Sperimentale dell'Abruzzo e Molise "G. Caporale"                                                                                                                                                                                                                         | Lorusso A., Maracci M., Di Domenico M., Ancora M., Curini V., Mangone I., Rinaldi A., Di Pasquale A., Cammà C., Puglia I., Calistri P., Savini G. |
| EP1_ISL_833297                                                                                                                                                                                                                                                                                                                                                                                                                                                                                                                                                                                                                                                                                                                                                                                                                                                                                                                                                                                                                                                                                                                                                                                                                                                                                                                                                                                                                                                                                                                                                                                                 |           | Spedale Civile Giulianova                                                                                                                                                                                                                                                                                      |                                                                            | Istituto Zooprofilattico Sperimentale dell'Abruzzo e Molise "G. Caporale"                                                                                                                                                                                                                         | Lorusso A., Maracci M., Di Domenico M., Ancora M., Curini V., Mangone I., Rinaldi A., Di Pasquale A., Cammà C., Puglia I., Calistri P., Savini G. |
| EP1_ISL_833304, EP1_ISL_833305                                                                                                                                                                                                                                                                                                                                                                                                                                                                                                                                                                                                                                                                                                                                                                                                                                                                                                                                                                                                                                                                                                                                                                                                                                                                                                                                                                                                                                                                                                                                                                                 |           | SIESP DIPARTIMENTO DI PREVENZIONE TERAMO                                                                                                                                                                                                                                                                       |                                                                            | Istituto Zooprofilattico Sperimentale dell'Abruzzo e Molise "G. Caporale"                                                                                                                                                                                                                         | Lorusso A., Maracci M., Di Domenico M., Ancora M., Curini V., Mangone I., Rinaldi A., Di Pasquale A., Cammà C., Puglia I., Calistri P., Savini G. |
| EP1_ISL_833306, EP1_ISL_833308                                                                                                                                                                                                                                                                                                                                                                                                                                                                                                                                                                                                                                                                                                                                                                                                                                                                                                                                                                                                                                                                                                                                                                                                                                                                                                                                                                                                                                                                                                                                                                                 |           | SIESP CHIETI - DRIVE IN ORTONA                                                                                                                                                                                                                                                                                 |                                                                            | Istituto Zooprofilattico Sperimentale dell'Abruzzo e Molise "G. Caporale"                                                                                                                                                                                                                         | Lorusso A., Maracci M., Di Domenico M., Ancora M., Curini V., Mangone I., Rinaldi A., Di Pasquale A., Cammà C., Puglia I., Calistri P., Savini G. |
| EP1_ISL_833311, EP1_ISL_833312                                                                                                                                                                                                                                                                                                                                                                                                                                                                                                                                                                                                                                                                                                                                                                                                                                                                                                                                                                                                                                                                                                                                                                                                                                                                                                                                                                                                                                                                                                                                                                                 |           | SIESP CHIETI- DRIVE IN CHIETI                                                                                                                                                                                                                                                                                  |                                                                            | Istituto Zooprofilattico Sperimentale dell'Abruzzo e Molise "G. Caporale"                                                                                                                                                                                                                         | Lorusso A., Maracci M., Di Domenico M., Ancora M., Curini V., Mangone I., Rinaldi A., Di Pasquale A., Cammà C., Puglia I., Calistri P., Savini G. |
| EP1_ISL_833316                                                                                                                                                                                                                                                                                                                                                                                                                                                                                                                                                                                                                                                                                                                                                                                                                                                                                                                                                                                                                                                                                                                                                                                                                                                                                                                                                                                                                                                                                                                                                                                                 |           | SIESP CHIETI - DRIVE IN GISSI                                                                                                                                                                                                                                                                                  |                                                                            | Istituto Zooprofilattico Sperimentale dell'Abruzzo e Molise "G. Caporale"                                                                                                                                                                                                                         | Lorusso A., Maracci M., Di Domenico M., Ancora M., Curini V., Mangone I., Rinaldi A., Di Pasquale A., Cammà C., Puglia I., Calistri P., Savini G. |
| EP1_ISL_833320                                                                                                                                                                                                                                                                                                                                                                                                                                                                                                                                                                                                                                                                                                                                                                                                                                                                                                                                                                                                                                                                                                                                                                                                                                                                                                                                                                                                                                                                                                                                                                                                 |           | SIESP DIPARTIMENTO DI PREVENZIONE SULMONA                                                                                                                                                                                                                                                                      |                                                                            | Istituto Zooprofilattico Sperimentale dell'Abruzzo e Molise "G. Caporale"                                                                                                                                                                                                                         | Lorusso A., Maracci M., Di Domenico M., Ancora M., Curini V., Mangone I., Rinaldi A., Di Pasquale A., Cammà C., Puglia I., Calistri P., Savini G. |
| EP1_ISL_833325                                                                                                                                                                                                                                                                                                                                                                                                                                                                                                                                                                                                                                                                                                                                                                                                                                                                                                                                                                                                                                                                                                                                                                                                                                                                                                                                                                                                                                                                                                                                                                                                 |           | Spedale SS Annunziata Chieti                                                                                                                                                                                                                                                                                   |                                                                            | Istituto Zooprofilattico Sperimentale dell'Abruzzo e Molise "G. Caporale"                                                                                                                                                                                                                         | Lorusso A., Maracci M., Di Domenico M., Ancora M., Curini V., Mangone I., Rinaldi A., Di Pasquale A., Cammà C., Puglia I., Calistri P., Savini G. |
| EP1_ISL_833329, EP1_ISL_833330                                                                                                                                                                                                                                                                                                                                                                                                                                                                                                                                                                                                                                                                                                                                                                                                                                                                                                                                                                                                                                                                                                                                                                                                                                                                                                                                                                                                                                                                                                                                                                                 |           | SIESP CHIETI - DRIVE IN ORTONA                                                                                                                                                                                                                                                                                 |                                                                            | Istituto Zooprofilattico Sperimentale dell'Abruzzo e Molise "G. Caporale"                                                                                                                                                                                                                         | Lorusso A., Maracci M., Di Domenico M., Ancora M., Curini V., Mangone I., Rinaldi A., Di Pasquale A., Cammà C., Puglia I., Calistri P., Savini G. |
| EP1_ISL_833331                                                                                                                                                                                                                                                                                                                                                                                                                                                                                                                                                                                                                                                                                                                                                                                                                                                                                                                                                                                                                                                                                                                                                                                                                                                                                                                                                                                                                                                                                                                                                                                                 |           | Spedale Civile Atri                                                                                                                                                                                                                                                                                            |                                                                            | Istituto Zooprofilattico Sperimentale dell'Abruzzo e Molise "G. Caporale"                                                                                                                                                                                                                         | Lorusso A., Maracci M., Di Domenico M., Ancora M., Curini V., Mangone I., Rinaldi A., Di Pasquale A., Cammà C., Puglia I., Calistri P., Savini G. |
| EP1_ISL_833371                                                                                                                                                                                                                                                                                                                                                                                                                                                                                                                                                                                                                                                                                                                                                                                                                                                                                                                                                                                                                                                                                                                                                                                                                                                                                                                                                                                                                                                                                                                                                                                                 |           | Pathogen Genomics Center, National Institute of Infectious Diseases                                                                                                                                                                                                                                            |                                                                            | Tsuyoshi Sekizuka, Kenaro Tokawa, Rina Tanaka, Masanori Hashino, Makoto Kuroda                                                                                                                                                                                                                    |                                                                                                                                                   |
| EP1_ISL_833436, EP1_ISL_833439, EP1_ISL_833440, EP1_ISL_833441, EP1_ISL_833445, EP1_ISL_833446, EP1_ISL_833447, EP1_ISL_833448, EP1_ISL_833449, EP1_ISL_833450, EP1_ISL_833451, EP1_ISL_833452, EP1_ISL_833453, EP1_ISL_833455                                                                                                                                                                                                                                                                                                                                                                                                                                                                                                                                                                                                                                                                                                                                                                                                                                                                                                                                                                                                                                                                                                                                                                                                                                                                                                                                                                                 | see above | SC (UO) Igiene e Sanità Pubblica (funzione integrata con SC Microbiologia e Virologia) e Laboratory of Molecular Virology of the International Centre for Genetic Engineering and Biotechnology (ICGEB)                                                                                                        | ARGO Laboratorio Genomica ed Epigenomica                                   | Licastro D., Dal Monengo S., Degasperi M., Marcellio A., D'Agaro P.                                                                                                                                                                                                                               |                                                                                                                                                   |
| EP1_ISL_833457, EP1_ISL_833461, EP1_ISL_833469, EP1_ISL_833479                                                                                                                                                                                                                                                                                                                                                                                                                                                                                                                                                                                                                                                                                                                                                                                                                                                                                                                                                                                                                                                                                                                                                                                                                                                                                                                                                                                                                                                                                                                                                 |           | CHU Purpan - Laboratoire de Virologie - Institut Fédératif de Biologie                                                                                                                                                                                                                                         | CHU Purpan - Laboratoire de Virologie - Institut Fédératif de Biologie     | Lalour J., RANGER N., DUROS M., CARRENAC R., HARER A., BOYER P., TERREAUX P., IZPEAU I.                                                                                                                                                                                                           |                                                                                                                                                   |
| EP1_ISL_833586, EP1_ISL_833607                                                                                                                                                                                                                                                                                                                                                                                                                                                                                                                                                                                                                                                                                                                                                                                                                                                                                                                                                                                                                                                                                                                                                                                                                                                                                                                                                                                                                                                                                                                                                                                 |           | Lighthouse Lab in Milton Keynes                                                                                                                                                                                                                                                                                | Wellcome Sanger Institute for the COVID-19 Genomics UK (COG-UK) Consortium | The Lighthouse Lab in Milton Keynes and Alex Alderton, Roberto Amato, Sonia Goncalves, Ewan Harrison, David K. Jackson, Ian Johnston, Dominic Kwiatkowski, Cordelia Langford, John Sillitoe on behalf of the Wellcome Sanger Institute COVID-19 Surveillance Team                                 |                                                                                                                                                   |
| EP1_ISL_833630, EP1_ISL_833684, EP1_ISL_833699                                                                                                                                                                                                                                                                                                                                                                                                                                                                                                                                                                                                                                                                                                                                                                                                                                                                                                                                                                                                                                                                                                                                                                                                                                                                                                                                                                                                                                                                                                                                                                 |           | Lighthouse Lab in Cambridge                                                                                                                                                                                                                                                                                    | Wellcome Sanger Institute for the COVID-19 Genomics UK (COG-UK) Consortium | Rob Howes, The Lighthouse Lab in Cambridge and Alex Alderton, Roberto Amato, Sonia Goncalves, Ewan Harrison, David K. Jackson, Ian Johnston, Dominic Kwiatkowski, Cordelia Langford, John Sillitoe on behalf of the Wellcome Sanger Institute COVID-19 Surveillance Team                          |                                                                                                                                                   |
| EP1_ISL_833754, EP1_ISL_833769, EP1_ISL_833794                                                                                                                                                                                                                                                                                                                                                                                                                                                                                                                                                                                                                                                                                                                                                                                                                                                                                                                                                                                                                                                                                                                                                                                                                                                                                                                                                                                                                                                                                                                                                                 |           | Lighthouse Lab in Milton Keynes                                                                                                                                                                                                                                                                                | Wellcome Sanger Institute for the COVID-19 Genomics UK (COG-UK) Consortium | The Lighthouse Lab in Milton Keynes and Alex Alderton, Roberto Amato, Sonia Goncalves, Ewan Harrison, David K. Jackson, Ian Johnston, Dominic Kwiatkowski, Cordelia Langford, John Sillitoe on behalf of the Wellcome Sanger Institute COVID-19 Surveillance Team                                 |                                                                                                                                                   |
| EP1_ISL_833797                                                                                                                                                                                                                                                                                                                                                                                                                                                                                                                                                                                                                                                                                                                                                                                                                                                                                                                                                                                                                                                                                                                                                                                                                                                                                                                                                                                                                                                                                                                                                                                                 |           | Lighthouse Lab in Milton Keynes                                                                                                                                                                                                                                                                                | Wellcome Sanger Institute for the COVID-19 Genomics UK (COG-UK) Consortium | Rob Howes, The Lighthouse Lab in Cambridge and Alex Alderton, Roberto Amato, Sonia Goncalves, Ewan Harrison, David K. Jackson, Ian Johnston, Dominic Kwiatkowski, Cordelia Langford, John Sillitoe on behalf of the Wellcome Sanger Institute COVID-19 Surveillance Team                          |                                                                                                                                                   |
| EP1_ISL_833842, EP1_ISL_833849, EP1_ISL_833859, EP1_ISL_833910, EP1_ISL_833926                                                                                                                                                                                                                                                                                                                                                                                                                                                                                                                                                                                                                                                                                                                                                                                                                                                                                                                                                                                                                                                                                                                                                                                                                                                                                                                                                                                                                                                                                                                                 |           | Lighthouse Lab in Cambridge                                                                                                                                                                                                                                                                                    | Wellcome Sanger Institute for the COVID-19 Genomics UK (COG-UK) Consortium | Jacquelyn Wynn, Mairead Hyland, The Lighthouse Lab in Alderley Park and Alex Alderton, Roberto Amato, Sonia Goncalves, Ewan Harrison, David K. Jackson, Ian Johnston, Dominic Kwiatkowski, Cordelia Langford, John Sillitoe on behalf of the Wellcome Sanger Institute COVID-19 Surveillance Team |                                                                                                                                                   |
| EP1_ISL_833934, EP1_ISL_833944, EP1_ISL_833955, EP1_ISL_833960, EP1_ISL_833962, EP1_ISL_833979, EP1_ISL_833989, EP1_ISL_833991, EP1_ISL_833995, EP1_ISL_834001, EP1_ISL_834003, EP1_ISL_834004, EP1_ISL_834007, EP1_ISL_834013, EP1_ISL_834015, EP1_ISL_834017, EP1_ISL_834021, EP1_ISL_834023, EP1_ISL_834024, EP1_ISL_834032, EP1_ISL_834033, EP1_ISL_834034, EP1_ISL_834042, EP1_ISL_834045, EP1_ISL_834050, EP1_ISL_834052, EP1_ISL_834054, EP1_ISL_834057, EP1_ISL_834059, EP1_ISL_834062, EP1_ISL_834066, EP1_ISL_834070, EP1_ISL_834072, EP1_ISL_834074, EP1_ISL_834078, EP1_ISL_834087, EP1_ISL_834088, EP1_ISL_834098, EP1_ISL_834105, EP1_ISL_834109, EP1_ISL_834116, EP1_ISL_834118, EP1_ISL_834124, EP1_ISL_834129, EP1_ISL_834130, EP1_ISL_834136, EP1_ISL_834137, EP1_ISL_834147, EP1_ISL_834150, EP1_ISL_834159, EP1_ISL_834197, EP1_ISL_834198, EP1_ISL_834205, EP1_ISL_834206, EP1_ISL_834221, EP1_ISL_834223, EP1_ISL_834229, EP1_ISL_834230, EP1_ISL_834232, EP1_ISL_834233, EP1_ISL_834234, EP1_ISL_834236, EP1_ISL_834237, EP1_ISL_834260, EP1_ISL_834261, EP1_ISL_834262, EP1_ISL_834263, EP1_ISL_834264, EP1_ISL_834267, EP1_ISL_834281, EP1_ISL_834282, EP1_ISL_834283, EP1_ISL_834287, EP1_ISL_834294, EP1_ISL_834300, EP1_ISL_834306, EP1_ISL_834320, EP1_ISL_834330, EP1_ISL_834339, EP1_ISL_834343, EP1_ISL_834344, EP1_ISL_834345, EP1_ISL_834404, EP1_ISL_834409, EP1_ISL_834470, EP1_ISL_834472, EP1_ISL_834473, EP1_ISL_834476, EP1_ISL_834479, EP1_ISL_834481, EP1_ISL_834483, EP1_ISL_834497, EP1_ISL_834499, EP1_ISL_834522, EP1_ISL_834542, EP1_ISL_834543, EP1_ISL_834551 | see above | Jacquelyn Wynn, Mairead Hyland, The Lighthouse Lab in Alderley Park and Alex Alderton, Roberto Amato, Sonia Goncalves, Ewan Harrison, David K. Jackson, Ian Johnston, Dominic Kwiatkowski, Cordelia Langford, John Sillitoe on behalf of the Wellcome Sanger Institute COVID-19 Surveillance Team              |                                                                            |                                                                                                                                                                                                                                                                                                   |                                                                                                                                                   |
| EP1_ISL_834568, EP1_ISL_834571, EP1_ISL_834576, EP1_ISL_834582, EP1_ISL_834583, EP1_ISL_834584, EP1_ISL_834589, EP1_ISL_834603, EP1_ISL_834608, EP1_ISL_834613, EP1_ISL_834614, EP1_ISL_834623, EP1_ISL_834632, EP1_ISL_834633, EP1_ISL_834642, EP1_ISL_834644, EP1_ISL_834645, EP1_ISL_834646, EP1_ISL_834647, EP1_ISL_834657, EP1_ISL_834666, EP1_ISL_834668, EP1_ISL_834678, EP1_ISL_834684, EP1_ISL_834691, EP1_ISL_834693, EP1_ISL_834694, EP1_ISL_834724, EP1_ISL_834726, EP1_ISL_834729, EP1_ISL_834733, EP1_ISL_834737, EP1_ISL_834741, EP1_ISL_834752, EP1_ISL_834759, EP1_ISL_834771, EP1_ISL_834780, EP1_ISL_834781, EP1_ISL_834789, EP1_ISL_834793, EP1_ISL_834795                                                                                                                                                                                                                                                                                                                                                                                                                                                                                                                                                                                                                                                                                                                                                                                                                                                                                                                                 | see above | Harpreet Varshenbanshu, Yurni Kasai, David Gray, Carol Clugston, Anna Dominiczak and Alex Alderton, Roberto Amato, Sonia Goncalves, Ewan Harrison, David K. Jackson, Ian Johnston, Dominic Kwiatkowski, Cordelia Langford, John Sillitoe on behalf of the Wellcome Sanger Institute COVID-19 Surveillance Team |                                                                            |                                                                                                                                                                                                                                                                                                   |                                                                                                                                                   |
| EP1_ISL_834802, EP1_ISL_834817, EP1_ISL_834821, EP1_ISL_834828, EP1_ISL_834830, EP1_ISL_834835, EP1_ISL_834846, EP1_ISL_834854, EP1_ISL_834855, EP1_ISL_834856, EP1_ISL_834859, EP1_ISL_834862, EP1_ISL_834863, EP1_ISL_834877, EP1_ISL_834879, EP1_ISL_834887, EP1_ISL_834895, EP1_ISL_834902, EP1_ISL_834906, EP1_ISL_834907, EP1_ISL_834913, EP1_ISL_834918, EP1_ISL_834929, EP1_ISL_834944, EP1_ISL_834946, EP1_ISL_834968, EP1_ISL_834978, EP1_ISL_834980, EP1_ISL_834986, EP1_ISL_834998, EP1_ISL_835012, EP1_ISL_835014, EP1_ISL_835021, EP1_ISL_835023, EP1_ISL_835028, EP1_ISL_835030, EP1_ISL_835039, EP1_ISL_835072, EP1_ISL_835073, EP1_ISL_835076, EP1_ISL_835077, EP1_ISL_835082, EP1_ISL_835085, EP1_ISL_835088, EP1_ISL_835093, EP1_ISL_835100, EP1_ISL_835106, EP1_ISL_835108, EP1_ISL_835111, EP1_ISL_835114, EP1_ISL_835120, EP1_ISL_835121, EP1_ISL_835124, EP1_ISL_835126, EP1_ISL_835129, EP1_ISL_835131, EP1_ISL_835134, EP1_ISL_835142                                                                                                                                                                                                                                                                                                                                                                                                                                                                                                                                                                                                                                                 | see above | Jacquelyn Wynn, Mairead Hyland, The Lighthouse Lab in Alderley Park and Alex Alderton, Roberto Amato, Sonia Goncalves, Ewan Harrison, David K. Jackson, Ian Johnston, Dominic Kwiatkowski, Cordelia Langford, John Sillitoe on behalf of the Wellcome Sanger Institute COVID-19 Surveillance Team              |                                                                            |                                                                                                                                                                                                                                                                                                   |                                                                                                                                                   |
| EP1_ISL_835143, EP1_ISL_835145, EP1_ISL_835149, EP1_ISL_835153, EP1_ISL_835156, EP1_ISL_835157, EP1_ISL_835159, EP1_ISL_835160, EP1_ISL_835165, EP1_ISL_835167, EP1_ISL_835169, EP1_ISL_835183, EP1_ISL_835186, EP1_ISL_835194, EP1_ISL_835198, EP1_ISL_835200, EP1_ISL_835204, EP1_ISL_835217, EP1_ISL_835219, EP1_ISL_835223, EP1_ISL_835231, EP1_ISL_835232, EP1_ISL_835237, EP1_ISL_835240, EP1_ISL_835241, EP1_ISL_835246, EP1_ISL_835252, EP1_ISL_835258, EP1_ISL_835268, EP1_ISL_835269, EP1_ISL_835270, EP1_ISL_835271, EP1_ISL_835272, EP1_ISL_835284                                                                                                                                                                                                                                                                                                                                                                                                                                                                                                                                                                                                                                                                                                                                                                                                                                                                                                                                                                                                                                                 | see above | Jacquelyn Wynn, Mairead Hyland, The Lighthouse Lab in Alderley Park and Alex Alderton, Roberto Amato, Sonia Goncalves, Ewan Harrison, David K. Jackson, Ian Johnston, Dominic Kwiatkowski, Cordelia Langford, John Sillitoe on behalf of the Wellcome Sanger Institute COVID-19 Surveillance Team              |                                                                            |                                                                                                                                                                                                                                                                                                   |                                                                                                                                                   |



|                                                                                                                                                                                                                                                                                                                                                                                                                                                                                                                                                                                                                                                                                                                                                                                                                                                                                                                                                                                                                                                                                                                                                                                                                                                                                                                                                                                                                                                                                                                                                                                                                                                                                                                                                                                                                                                                                                                                                                                                                                                                                                                                                                                                                                                                                                                                                                                                                                                                                                                                                                                                                                                                                                                                                                                                                                                                                                                                                                                                                                                                                                                                                                                                                                                                                                                                                                                                                                                                                                                                                                                                                                                                                                                                                                                                                                                                                                                                                                                                                                                                                                                                                                                                                                                                                                                                                                                                                                                                                                                                                                                                                                                                                                                                                                                                                                                                                                                                                                                                                                                                                                                                                                                                                |                                                                                                                                                                                                                                                                                                                                                                                                                                                                                                                                     |                                                                                                                                                                                                           |                                                                                                                                                                                                                                                                                                                                                                   |
|----------------------------------------------------------------------------------------------------------------------------------------------------------------------------------------------------------------------------------------------------------------------------------------------------------------------------------------------------------------------------------------------------------------------------------------------------------------------------------------------------------------------------------------------------------------------------------------------------------------------------------------------------------------------------------------------------------------------------------------------------------------------------------------------------------------------------------------------------------------------------------------------------------------------------------------------------------------------------------------------------------------------------------------------------------------------------------------------------------------------------------------------------------------------------------------------------------------------------------------------------------------------------------------------------------------------------------------------------------------------------------------------------------------------------------------------------------------------------------------------------------------------------------------------------------------------------------------------------------------------------------------------------------------------------------------------------------------------------------------------------------------------------------------------------------------------------------------------------------------------------------------------------------------------------------------------------------------------------------------------------------------------------------------------------------------------------------------------------------------------------------------------------------------------------------------------------------------------------------------------------------------------------------------------------------------------------------------------------------------------------------------------------------------------------------------------------------------------------------------------------------------------------------------------------------------------------------------------------------------------------------------------------------------------------------------------------------------------------------------------------------------------------------------------------------------------------------------------------------------------------------------------------------------------------------------------------------------------------------------------------------------------------------------------------------------------------------------------------------------------------------------------------------------------------------------------------------------------------------------------------------------------------------------------------------------------------------------------------------------------------------------------------------------------------------------------------------------------------------------------------------------------------------------------------------------------------------------------------------------------------------------------------------------------------------------------------------------------------------------------------------------------------------------------------------------------------------------------------------------------------------------------------------------------------------------------------------------------------------------------------------------------------------------------------------------------------------------------------------------------------------------------------------------------------------------------------------------------------------------------------------------------------------------------------------------------------------------------------------------------------------------------------------------------------------------------------------------------------------------------------------------------------------------------------------------------------------------------------------------------------------------------------------------------------------------------------------------------------------------------------------------------------------------------------------------------------------------------------------------------------------------------------------------------------------------------------------------------------------------------------------------------------------------------------------------------------------------------------------------------------------------------------------------------------------------------------------------|-------------------------------------------------------------------------------------------------------------------------------------------------------------------------------------------------------------------------------------------------------------------------------------------------------------------------------------------------------------------------------------------------------------------------------------------------------------------------------------------------------------------------------------|-----------------------------------------------------------------------------------------------------------------------------------------------------------------------------------------------------------|-------------------------------------------------------------------------------------------------------------------------------------------------------------------------------------------------------------------------------------------------------------------------------------------------------------------------------------------------------------------|
| EPI_ISL_836858; EPI_ISL_836863                                                                                                                                                                                                                                                                                                                                                                                                                                                                                                                                                                                                                                                                                                                                                                                                                                                                                                                                                                                                                                                                                                                                                                                                                                                                                                                                                                                                                                                                                                                                                                                                                                                                                                                                                                                                                                                                                                                                                                                                                                                                                                                                                                                                                                                                                                                                                                                                                                                                                                                                                                                                                                                                                                                                                                                                                                                                                                                                                                                                                                                                                                                                                                                                                                                                                                                                                                                                                                                                                                                                                                                                                                                                                                                                                                                                                                                                                                                                                                                                                                                                                                                                                                                                                                                                                                                                                                                                                                                                                                                                                                                                                                                                                                                                                                                                                                                                                                                                                                                                                                                                                                                                                                                 | Lighthouse Lab in Alderley Park                                                                                                                                                                                                                                                                                                                                                                                                                                                                                                     | Wellcome Sanger Institute for the COVID-19 Genomics UK (COG-UK) Consortium                                                                                                                                | Jacquelyn Wynn, Mairead Hyland, The Lighthouse Lab in Alderley Park and Alex Alderton, Roberto Amato, Sonia Goncalves, Ewan Harrison, David K. Jackson, Ian Johnston, Dominic Kwiatkowski, Cordelia Langford, John Sillince on behalf of the Wellcome Sanger Institute COVID-19 Surveillance Team                                                                 |
| EPI_ISL_836864                                                                                                                                                                                                                                                                                                                                                                                                                                                                                                                                                                                                                                                                                                                                                                                                                                                                                                                                                                                                                                                                                                                                                                                                                                                                                                                                                                                                                                                                                                                                                                                                                                                                                                                                                                                                                                                                                                                                                                                                                                                                                                                                                                                                                                                                                                                                                                                                                                                                                                                                                                                                                                                                                                                                                                                                                                                                                                                                                                                                                                                                                                                                                                                                                                                                                                                                                                                                                                                                                                                                                                                                                                                                                                                                                                                                                                                                                                                                                                                                                                                                                                                                                                                                                                                                                                                                                                                                                                                                                                                                                                                                                                                                                                                                                                                                                                                                                                                                                                                                                                                                                                                                                                                                 | Lighthouse Lab in Glasgow                                                                                                                                                                                                                                                                                                                                                                                                                                                                                                           | Wellcome Sanger Institute for the COVID-19 Genomics UK (COG-UK) Consortium                                                                                                                                | Harper VanSleenhouse, Yurni Kasai, David Gray, Carol Clugston, Anna Dominiczak and Alex Alderton, Roberto Amato, Sonia Goncalves, Ewan Harrison, David K. Jackson, Ian Johnston, Dominic Kwiatkowski, Cordelia Langford, John Sillince on behalf of the Wellcome Sanger Institute COVID-19 Surveillance Team                                                      |
| EPI_ISL_836867                                                                                                                                                                                                                                                                                                                                                                                                                                                                                                                                                                                                                                                                                                                                                                                                                                                                                                                                                                                                                                                                                                                                                                                                                                                                                                                                                                                                                                                                                                                                                                                                                                                                                                                                                                                                                                                                                                                                                                                                                                                                                                                                                                                                                                                                                                                                                                                                                                                                                                                                                                                                                                                                                                                                                                                                                                                                                                                                                                                                                                                                                                                                                                                                                                                                                                                                                                                                                                                                                                                                                                                                                                                                                                                                                                                                                                                                                                                                                                                                                                                                                                                                                                                                                                                                                                                                                                                                                                                                                                                                                                                                                                                                                                                                                                                                                                                                                                                                                                                                                                                                                                                                                                                                 | Lighthouse Lab in Alderley Park                                                                                                                                                                                                                                                                                                                                                                                                                                                                                                     | Wellcome Sanger Institute for the COVID-19 Genomics UK (COG-UK) Consortium                                                                                                                                | Jacquelyn Wynn, Mairead Hyland, The Lighthouse Lab in Alderley Park and Alex Alderton, Roberto Amato, Sonia Goncalves, Ewan Harrison, David K. Jackson, Ian Johnston, Dominic Kwiatkowski, Cordelia Langford, John Sillince on behalf of the Wellcome Sanger Institute COVID-19 Surveillance Team                                                                 |
| EPI_ISL_836869; EPI_ISL_836893                                                                                                                                                                                                                                                                                                                                                                                                                                                                                                                                                                                                                                                                                                                                                                                                                                                                                                                                                                                                                                                                                                                                                                                                                                                                                                                                                                                                                                                                                                                                                                                                                                                                                                                                                                                                                                                                                                                                                                                                                                                                                                                                                                                                                                                                                                                                                                                                                                                                                                                                                                                                                                                                                                                                                                                                                                                                                                                                                                                                                                                                                                                                                                                                                                                                                                                                                                                                                                                                                                                                                                                                                                                                                                                                                                                                                                                                                                                                                                                                                                                                                                                                                                                                                                                                                                                                                                                                                                                                                                                                                                                                                                                                                                                                                                                                                                                                                                                                                                                                                                                                                                                                                                                 | Lighthouse Lab in Glasgow                                                                                                                                                                                                                                                                                                                                                                                                                                                                                                           | Wellcome Sanger Institute for the COVID-19 Genomics UK (COG-UK) Consortium                                                                                                                                | Harper VanSleenhouse, Yurni Kasai, David Gray, Carol Clugston, Anna Dominiczak and Alex Alderton, Roberto Amato, Sonia Goncalves, Ewan Harrison, David K. Jackson, Ian Johnston, Dominic Kwiatkowski, Cordelia Langford, John Sillince on behalf of the Wellcome Sanger Institute COVID-19 Surveillance Team                                                      |
| EPI_ISL_836914                                                                                                                                                                                                                                                                                                                                                                                                                                                                                                                                                                                                                                                                                                                                                                                                                                                                                                                                                                                                                                                                                                                                                                                                                                                                                                                                                                                                                                                                                                                                                                                                                                                                                                                                                                                                                                                                                                                                                                                                                                                                                                                                                                                                                                                                                                                                                                                                                                                                                                                                                                                                                                                                                                                                                                                                                                                                                                                                                                                                                                                                                                                                                                                                                                                                                                                                                                                                                                                                                                                                                                                                                                                                                                                                                                                                                                                                                                                                                                                                                                                                                                                                                                                                                                                                                                                                                                                                                                                                                                                                                                                                                                                                                                                                                                                                                                                                                                                                                                                                                                                                                                                                                                                                 | Lighthouse Lab in Glasgow                                                                                                                                                                                                                                                                                                                                                                                                                                                                                                           | Wellcome Sanger Institute for the COVID-19 Genomics UK (COG-UK) Consortium                                                                                                                                | Harper VanSleenhouse, Yurni Kasai, David Gray, Carol Clugston, Anna Dominiczak and Alex Alderton, Roberto Amato, Sonia Goncalves, Ewan Harrison, David K. Jackson, Ian Johnston, Dominic Kwiatkowski, Cordelia Langford, John Sillince on behalf of the Wellcome Sanger Institute COVID-19 Surveillance Team                                                      |
| EPI_ISL_836897; EPI_ISL_836903                                                                                                                                                                                                                                                                                                                                                                                                                                                                                                                                                                                                                                                                                                                                                                                                                                                                                                                                                                                                                                                                                                                                                                                                                                                                                                                                                                                                                                                                                                                                                                                                                                                                                                                                                                                                                                                                                                                                                                                                                                                                                                                                                                                                                                                                                                                                                                                                                                                                                                                                                                                                                                                                                                                                                                                                                                                                                                                                                                                                                                                                                                                                                                                                                                                                                                                                                                                                                                                                                                                                                                                                                                                                                                                                                                                                                                                                                                                                                                                                                                                                                                                                                                                                                                                                                                                                                                                                                                                                                                                                                                                                                                                                                                                                                                                                                                                                                                                                                                                                                                                                                                                                                                                 | Lighthouse Lab in Alderley Park                                                                                                                                                                                                                                                                                                                                                                                                                                                                                                     | Wellcome Sanger Institute for the COVID-19 Genomics UK (COG-UK) Consortium                                                                                                                                | Jacquelyn Wynn, Mairead Hyland, The Lighthouse Lab in Alderley Park and Alex Alderton, Roberto Amato, Sonia Goncalves, Ewan Harrison, David K. Jackson, Ian Johnston, Dominic Kwiatkowski, Cordelia Langford, John Sillince on behalf of the Wellcome Sanger Institute COVID-19 Surveillance Team                                                                 |
| EPI_ISL_836909                                                                                                                                                                                                                                                                                                                                                                                                                                                                                                                                                                                                                                                                                                                                                                                                                                                                                                                                                                                                                                                                                                                                                                                                                                                                                                                                                                                                                                                                                                                                                                                                                                                                                                                                                                                                                                                                                                                                                                                                                                                                                                                                                                                                                                                                                                                                                                                                                                                                                                                                                                                                                                                                                                                                                                                                                                                                                                                                                                                                                                                                                                                                                                                                                                                                                                                                                                                                                                                                                                                                                                                                                                                                                                                                                                                                                                                                                                                                                                                                                                                                                                                                                                                                                                                                                                                                                                                                                                                                                                                                                                                                                                                                                                                                                                                                                                                                                                                                                                                                                                                                                                                                                                                                 | Lighthouse Lab in Glasgow                                                                                                                                                                                                                                                                                                                                                                                                                                                                                                           | Wellcome Sanger Institute for the COVID-19 Genomics UK (COG-UK) Consortium                                                                                                                                | Harper VanSleenhouse, Yurni Kasai, David Gray, Carol Clugston, Anna Dominiczak and Alex Alderton, Roberto Amato, Sonia Goncalves, Ewan Harrison, David K. Jackson, Ian Johnston, Dominic Kwiatkowski, Cordelia Langford, John Sillince on behalf of the Wellcome Sanger Institute COVID-19 Surveillance Team                                                      |
| EPI_ISL_836917                                                                                                                                                                                                                                                                                                                                                                                                                                                                                                                                                                                                                                                                                                                                                                                                                                                                                                                                                                                                                                                                                                                                                                                                                                                                                                                                                                                                                                                                                                                                                                                                                                                                                                                                                                                                                                                                                                                                                                                                                                                                                                                                                                                                                                                                                                                                                                                                                                                                                                                                                                                                                                                                                                                                                                                                                                                                                                                                                                                                                                                                                                                                                                                                                                                                                                                                                                                                                                                                                                                                                                                                                                                                                                                                                                                                                                                                                                                                                                                                                                                                                                                                                                                                                                                                                                                                                                                                                                                                                                                                                                                                                                                                                                                                                                                                                                                                                                                                                                                                                                                                                                                                                                                                 | Lighthouse Lab in Glasgow                                                                                                                                                                                                                                                                                                                                                                                                                                                                                                           | Wellcome Sanger Institute for the COVID-19 Genomics UK (COG-UK) Consortium                                                                                                                                | Harper VanSleenhouse, Yurni Kasai, David Gray, Carol Clugston, Anna Dominiczak and Alex Alderton, Roberto Amato, Sonia Goncalves, Ewan Harrison, David K. Jackson, Ian Johnston, Dominic Kwiatkowski, Cordelia Langford, John Sillince on behalf of the Wellcome Sanger Institute COVID-19 Surveillance Team                                                      |
| EPI_ISL_836926; EPI_ISL_836935                                                                                                                                                                                                                                                                                                                                                                                                                                                                                                                                                                                                                                                                                                                                                                                                                                                                                                                                                                                                                                                                                                                                                                                                                                                                                                                                                                                                                                                                                                                                                                                                                                                                                                                                                                                                                                                                                                                                                                                                                                                                                                                                                                                                                                                                                                                                                                                                                                                                                                                                                                                                                                                                                                                                                                                                                                                                                                                                                                                                                                                                                                                                                                                                                                                                                                                                                                                                                                                                                                                                                                                                                                                                                                                                                                                                                                                                                                                                                                                                                                                                                                                                                                                                                                                                                                                                                                                                                                                                                                                                                                                                                                                                                                                                                                                                                                                                                                                                                                                                                                                                                                                                                                                 | Lighthouse Lab in Alderley Park                                                                                                                                                                                                                                                                                                                                                                                                                                                                                                     | Wellcome Sanger Institute for the COVID-19 Genomics UK (COG-UK) Consortium                                                                                                                                | Jacquelyn Wynn, Mairead Hyland, The Lighthouse Lab in Alderley Park and Alex Alderton, Roberto Amato, Sonia Goncalves, Ewan Harrison, David K. Jackson, Ian Johnston, Dominic Kwiatkowski, Cordelia Langford, John Sillince on behalf of the Wellcome Sanger Institute COVID-19 Surveillance Team                                                                 |
| EPI_ISL_836937; EPI_ISL_836939; EPI_ISL_836952; EPI_ISL_836969; EPI_ISL_836971                                                                                                                                                                                                                                                                                                                                                                                                                                                                                                                                                                                                                                                                                                                                                                                                                                                                                                                                                                                                                                                                                                                                                                                                                                                                                                                                                                                                                                                                                                                                                                                                                                                                                                                                                                                                                                                                                                                                                                                                                                                                                                                                                                                                                                                                                                                                                                                                                                                                                                                                                                                                                                                                                                                                                                                                                                                                                                                                                                                                                                                                                                                                                                                                                                                                                                                                                                                                                                                                                                                                                                                                                                                                                                                                                                                                                                                                                                                                                                                                                                                                                                                                                                                                                                                                                                                                                                                                                                                                                                                                                                                                                                                                                                                                                                                                                                                                                                                                                                                                                                                                                                                                 | Lighthouse Lab in Glasgow                                                                                                                                                                                                                                                                                                                                                                                                                                                                                                           | Wellcome Sanger Institute for the COVID-19 Genomics UK (COG-UK) Consortium                                                                                                                                | Harper VanSleenhouse, Yurni Kasai, David Gray, Carol Clugston, Anna Dominiczak and Alex Alderton, Roberto Amato, Sonia Goncalves, Ewan Harrison, David K. Jackson, Ian Johnston, Dominic Kwiatkowski, Cordelia Langford, John Sillince on behalf of the Wellcome Sanger Institute COVID-19 Surveillance Team                                                      |
| EPI_ISL_837229; EPI_ISL_837205; EPI_ISL_837206; EPI_ISL_837207; EPI_ISL_837208; EPI_ISL_837233; EPI_ISL_837234; EPI_ISL_837238; EPI_ISL_837240; EPI_ISL_837241; EPI_ISL_837245                                                                                                                                                                                                                                                                                                                                                                                                                                                                                                                                                                                                                                                                                                                                                                                                                                                                                                                                                                                                                                                                                                                                                                                                                                                                                                                                                                                                                                                                                                                                                                                                                                                                                                                                                                                                                                                                                                                                                                                                                                                                                                                                                                                                                                                                                                                                                                                                                                                                                                                                                                                                                                                                                                                                                                                                                                                                                                                                                                                                                                                                                                                                                                                                                                                                                                                                                                                                                                                                                                                                                                                                                                                                                                                                                                                                                                                                                                                                                                                                                                                                                                                                                                                                                                                                                                                                                                                                                                                                                                                                                                                                                                                                                                                                                                                                                                                                                                                                                                                                                                 | Respiratory Virus Unit, National Infection Service, Public Health England                                                                                                                                                                                                                                                                                                                                                                                                                                                           | COVID-19 Genomics UK (COG-UK) Consortium                                                                                                                                                                  | Antonia Giamaldi, Patrizia Annunziata, Francesco Panarello, Biancamaria Pierri, Valentina Bouche, Chiara Colaninno, Maria Concetta Cuomo, Denise Di Concilio, Luco Di Filippo, Anna Marrella, Marcello Salvi, Antonio Limone, Pelegino Centro, Andrea Balbado, Davide Cacchiarelli, Michael Carr, Gabriel Gonzalez, Jonathan Dean, Cillian F De Gascon            |
| EPI_ISL_837249; EPI_ISL_837251; EPI_ISL_837261; EPI_ISL_837262; EPI_ISL_837265; EPI_ISL_837266; EPI_ISL_837267; EPI_ISL_837268; EPI_ISL_837271; EPI_ISL_837272; EPI_ISL_837284; EPI_ISL_837287; EPI_ISL_837297; EPI_ISL_837305; EPI_ISL_837306; EPI_ISL_837307; EPI_ISL_837309; EPI_ISL_837318; EPI_ISL_837332; EPI_ISL_837324                                                                                                                                                                                                                                                                                                                                                                                                                                                                                                                                                                                                                                                                                                                                                                                                                                                                                                                                                                                                                                                                                                                                                                                                                                                                                                                                                                                                                                                                                                                                                                                                                                                                                                                                                                                                                                                                                                                                                                                                                                                                                                                                                                                                                                                                                                                                                                                                                                                                                                                                                                                                                                                                                                                                                                                                                                                                                                                                                                                                                                                                                                                                                                                                                                                                                                                                                                                                                                                                                                                                                                                                                                                                                                                                                                                                                                                                                                                                                                                                                                                                                                                                                                                                                                                                                                                                                                                                                                                                                                                                                                                                                                                                                                                                                                                                                                                                                 | Istituto Zooprofilattico Sperimentale del Mezzogiorno                                                                                                                                                                                                                                                                                                                                                                                                                                                                               | COVID-19 Genomics UK (COG-UK) Consortium                                                                                                                                                                  | Antonia Giamaldi, Patrizia Annunziata, Francesco Panarello, Biancamaria Pierri, Valentina Bouche, Chiara Colaninno, Maria Concetta Cuomo, Denise Di Concilio, Luco Di Filippo, Anna Marrella, Marcello Salvi, Antonio Limone, Pelegino Centro, Andrea Balbado, Davide Cacchiarelli, Michael Carr, Gabriel Gonzalez, Jonathan Dean, Cillian F De Gascon            |
| EPI_ISL_837354; EPI_ISL_837397; EPI_ISL_837406; EPI_ISL_837426; EPI_ISL_837415; EPI_ISL_837425                                                                                                                                                                                                                                                                                                                                                                                                                                                                                                                                                                                                                                                                                                                                                                                                                                                                                                                                                                                                                                                                                                                                                                                                                                                                                                                                                                                                                                                                                                                                                                                                                                                                                                                                                                                                                                                                                                                                                                                                                                                                                                                                                                                                                                                                                                                                                                                                                                                                                                                                                                                                                                                                                                                                                                                                                                                                                                                                                                                                                                                                                                                                                                                                                                                                                                                                                                                                                                                                                                                                                                                                                                                                                                                                                                                                                                                                                                                                                                                                                                                                                                                                                                                                                                                                                                                                                                                                                                                                                                                                                                                                                                                                                                                                                                                                                                                                                                                                                                                                                                                                                                                 | National Virus Reference Laboratory                                                                                                                                                                                                                                                                                                                                                                                                                                                                                                 | National Virus Reference Laboratory                                                                                                                                                                       | Michael Carr, Gabriel Gonzalez, Jonathan Dean, Cillian F De Gascon                                                                                                                                                                                                                                                                                                |
| EPI_ISL_837433; EPI_ISL_837434; EPI_ISL_837435; EPI_ISL_837436; EPI_ISL_837443; EPI_ISL_837446; EPI_ISL_837451; EPI_ISL_837453; EPI_ISL_837454; EPI_ISL_837457; EPI_ISL_837461; EPI_ISL_837463; EPI_ISL_837464; EPI_ISL_837465; EPI_ISL_837470; EPI_ISL_837471; EPI_ISL_837479; EPI_ISL_837480; EPI_ISL_837483; EPI_ISL_837489; EPI_ISL_837490; EPI_ISL_837491; EPI_ISL_837492; EPI_ISL_837493; EPI_ISL_837494; EPI_ISL_837495; EPI_ISL_837497; EPI_ISL_837498; EPI_ISL_837501; EPI_ISL_837502; EPI_ISL_837503; EPI_ISL_837504                                                                                                                                                                                                                                                                                                                                                                                                                                                                                                                                                                                                                                                                                                                                                                                                                                                                                                                                                                                                                                                                                                                                                                                                                                                                                                                                                                                                                                                                                                                                                                                                                                                                                                                                                                                                                                                                                                                                                                                                                                                                                                                                                                                                                                                                                                                                                                                                                                                                                                                                                                                                                                                                                                                                                                                                                                                                                                                                                                                                                                                                                                                                                                                                                                                                                                                                                                                                                                                                                                                                                                                                                                                                                                                                                                                                                                                                                                                                                                                                                                                                                                                                                                                                                                                                                                                                                                                                                                                                                                                                                                                                                                                                                 | Istituto Zooprofilattico Sperimentale del Mezzogiorno                                                                                                                                                                                                                                                                                                                                                                                                                                                                               | COVID-19 Genomics UK (COG-UK) Consortium                                                                                                                                                                  | Antonia Giamaldi, Patrizia Annunziata, Francesco Panarello, Biancamaria Pierri, Valentina Bouche, Chiara Colaninno, Maria Concetta Cuomo, Denise Di Concilio, Luco Di Filippo, Anna Marrella, Marcello Salvi, Antonio Limone, Pelegino Centro, Andrea Balbado, Davide Cacchiarelli, Michael Carr, Gabriel Gonzalez, Jonathan Dean, Cillian F De Gascon            |
| EPI_ISL_838014; EPI_ISL_838042; EPI_ISL_838048                                                                                                                                                                                                                                                                                                                                                                                                                                                                                                                                                                                                                                                                                                                                                                                                                                                                                                                                                                                                                                                                                                                                                                                                                                                                                                                                                                                                                                                                                                                                                                                                                                                                                                                                                                                                                                                                                                                                                                                                                                                                                                                                                                                                                                                                                                                                                                                                                                                                                                                                                                                                                                                                                                                                                                                                                                                                                                                                                                                                                                                                                                                                                                                                                                                                                                                                                                                                                                                                                                                                                                                                                                                                                                                                                                                                                                                                                                                                                                                                                                                                                                                                                                                                                                                                                                                                                                                                                                                                                                                                                                                                                                                                                                                                                                                                                                                                                                                                                                                                                                                                                                                                                                 | University of Exeter                                                                                                                                                                                                                                                                                                                                                                                                                                                                                                                | COVID-19 Genomics UK (COG-UK) Consortium                                                                                                                                                                  | Ben Temperton, Aaron Jeffries, Michelle Michelson, Joanna Warwick-Dugdale, Audrey Fardos, Robyn Manley, Stephen Mitchell, Jane Masoli                                                                                                                                                                                                                             |
| EPI_ISL_838059; EPI_ISL_838063; EPI_ISL_838071; EPI_ISL_838075; EPI_ISL_838077; EPI_ISL_838079; EPI_ISL_838082; EPI_ISL_838108; EPI_ISL_838117; EPI_ISL_838118; EPI_ISL_838121; EPI_ISL_838122; EPI_ISL_838125; EPI_ISL_838126; EPI_ISL_838127; EPI_ISL_838128; EPI_ISL_838129; EPI_ISL_838143; EPI_ISL_838147; EPI_ISL_838148; EPI_ISL_838150; EPI_ISL_838151; EPI_ISL_838155; EPI_ISL_838156; EPI_ISL_838159; EPI_ISL_838160; EPI_ISL_838161; EPI_ISL_838162; EPI_ISL_838164; EPI_ISL_838167; EPI_ISL_838174; EPI_ISL_838177; EPI_ISL_838179; EPI_ISL_838180; EPI_ISL_838183; EPI_ISL_838185; EPI_ISL_838188; EPI_ISL_838194; EPI_ISL_838196; EPI_ISL_838206                                                                                                                                                                                                                                                                                                                                                                                                                                                                                                                                                                                                                                                                                                                                                                                                                                                                                                                                                                                                                                                                                                                                                                                                                                                                                                                                                                                                                                                                                                                                                                                                                                                                                                                                                                                                                                                                                                                                                                                                                                                                                                                                                                                                                                                                                                                                                                                                                                                                                                                                                                                                                                                                                                                                                                                                                                                                                                                                                                                                                                                                                                                                                                                                                                                                                                                                                                                                                                                                                                                                                                                                                                                                                                                                                                                                                                                                                                                                                                                                                                                                                                                                                                                                                                                                                                                                                                                                                                                                                                                                                 | Department of Pathology, University of Cambridge                                                                                                                                                                                                                                                                                                                                                                                                                                                                                    | COVID-19 Genomics UK (COG-UK) Consortium                                                                                                                                                                  | Aminu S. Jalun, Yashini Chaudhry, Grant Hall, Iliana Georgiana, Myra Hosiolo, Martin D. Curran, Mairé Prickett, Surindira Panar, Ian Goodfellow                                                                                                                                                                                                                   |
| EPI_ISL_838214; EPI_ISL_838215; EPI_ISL_838216; EPI_ISL_838217; EPI_ISL_838218; EPI_ISL_838219; EPI_ISL_838220; EPI_ISL_838221; EPI_ISL_838222; EPI_ISL_838223; EPI_ISL_838224; EPI_ISL_838225; EPI_ISL_838226; EPI_ISL_838228; EPI_ISL_838229; EPI_ISL_838230; EPI_ISL_838231; EPI_ISL_838232; EPI_ISL_838233; EPI_ISL_838234; EPI_ISL_838235; EPI_ISL_838236; EPI_ISL_838237; EPI_ISL_838238; EPI_ISL_838239; EPI_ISL_838240; EPI_ISL_838241; EPI_ISL_838242; EPI_ISL_838243; EPI_ISL_838244; EPI_ISL_838245; EPI_ISL_838246; EPI_ISL_838247; EPI_ISL_838248; EPI_ISL_838249; EPI_ISL_838250; EPI_ISL_838251; EPI_ISL_838252; EPI_ISL_838253; EPI_ISL_838254; EPI_ISL_838255; EPI_ISL_838256; EPI_ISL_838257; EPI_ISL_838258; EPI_ISL_838259; EPI_ISL_838260; EPI_ISL_838261; EPI_ISL_838262; EPI_ISL_838263; EPI_ISL_838264; EPI_ISL_838265; EPI_ISL_838266; EPI_ISL_838267; EPI_ISL_838268; EPI_ISL_838269; EPI_ISL_838270; EPI_ISL_838271; EPI_ISL_838272; EPI_ISL_838273; EPI_ISL_838274; EPI_ISL_838275; EPI_ISL_838276; EPI_ISL_838277; EPI_ISL_838278; EPI_ISL_838279; EPI_ISL_838280; EPI_ISL_838281; EPI_ISL_838282; EPI_ISL_838283; EPI_ISL_838289; EPI_ISL_838294; EPI_ISL_838298; EPI_ISL_838299; EPI_ISL_838300; EPI_ISL_838301; EPI_ISL_838302; EPI_ISL_838303; EPI_ISL_838309; EPI_ISL_838310; EPI_ISL_838311; EPI_ISL_838312; EPI_ISL_838313; EPI_ISL_838314                                                                                                                                                                                                                                                                                                                                                                                                                                                                                                                                                                                                                                                                                                                                                                                                                                                                                                                                                                                                                                                                                                                                                                                                                                                                                                                                                                                                                                                                                                                                                                                                                                                                                                                                                                                                                                                                                                                                                                                                                                                                                                                                                                                                                                                                                                                                                                                                                                                                                                                                                                                                                                                                                                                                                                                                                                                                                                                                                                                                                                                                                                                                                                                                                                                                                                                                                                                                                                                                                                                                                                                                                                                                                                                                                                                                                                 | West of Scotland Specialist Virology Centre, NHS/GGC / MRC-University of Glasgow Centre for Virus Research                                                                                                                                                                                                                                                                                                                                                                                                                          | COVID-19 Genomics UK (COG-UK) Consortium                                                                                                                                                                  | Ana de Silva, Filipa, Natasha Johnson, Kathy Snodgrass, Daniel Mar, Stephen Carmichael, Alice Brooks, Lily Tong, Jenna Nicolson, Kyriaki Nomiou, Sarah Macdonald, Richard Oton, Joseph Hughes, Steven Vardielli, David L Robertson, Alasdair MacLellan, Rory Gunson, Sarah Thomson, Rachel Burrow, Guy Molllet, Kathy L, James Shepherd, Antonia Ho, Emma Thomson |
| EPI_ISL_838319; EPI_ISL_838326; EPI_ISL_838327; EPI_ISL_838330; EPI_ISL_838332; EPI_ISL_838337; EPI_ISL_838339; EPI_ISL_838341; EPI_ISL_838342                                                                                                                                                                                                                                                                                                                                                                                                                                                                                                                                                                                                                                                                                                                                                                                                                                                                                                                                                                                                                                                                                                                                                                                                                                                                                                                                                                                                                                                                                                                                                                                                                                                                                                                                                                                                                                                                                                                                                                                                                                                                                                                                                                                                                                                                                                                                                                                                                                                                                                                                                                                                                                                                                                                                                                                                                                                                                                                                                                                                                                                                                                                                                                                                                                                                                                                                                                                                                                                                                                                                                                                                                                                                                                                                                                                                                                                                                                                                                                                                                                                                                                                                                                                                                                                                                                                                                                                                                                                                                                                                                                                                                                                                                                                                                                                                                                                                                                                                                                                                                                                                 | University of Edinburgh                                                                                                                                                                                                                                                                                                                                                                                                                                                                                                             | COVID-19 Genomics UK (COG-UK) Consortium                                                                                                                                                                  | Ben Temperton, Aaron Jeffries, Michelle Michelson, Joanna Warwick-Dugdale, Audrey Fardos, Robyn Manley, Stephen Mitchell, Jane Masoli                                                                                                                                                                                                                             |
| EPI_ISL_838356; EPI_ISL_838359; EPI_ISL_838360; EPI_ISL_838361; EPI_ISL_838362; EPI_ISL_838363; EPI_ISL_838364; EPI_ISL_838365; EPI_ISL_838366; EPI_ISL_838367; EPI_ISL_838368; EPI_ISL_838369; EPI_ISL_838370; EPI_ISL_838371; EPI_ISL_838372; EPI_ISL_838373; EPI_ISL_838374; EPI_ISL_838375; EPI_ISL_838376; EPI_ISL_838377; EPI_ISL_838378; EPI_ISL_838379; EPI_ISL_838380; EPI_ISL_838381; EPI_ISL_838382; EPI_ISL_838383; EPI_ISL_838384; EPI_ISL_838385; EPI_ISL_838386; EPI_ISL_838387; EPI_ISL_838388; EPI_ISL_838389; EPI_ISL_838390; EPI_ISL_838391; EPI_ISL_838392; EPI_ISL_838393; EPI_ISL_838394; EPI_ISL_838395; EPI_ISL_838396; EPI_ISL_838397; EPI_ISL_838398; EPI_ISL_838399; EPI_ISL_838400; EPI_ISL_838401; EPI_ISL_838402; EPI_ISL_838403; EPI_ISL_838404; EPI_ISL_838405; EPI_ISL_838406; EPI_ISL_838407; EPI_ISL_838408; EPI_ISL_838409; EPI_ISL_838410; EPI_ISL_838411; EPI_ISL_838412; EPI_ISL_838413; EPI_ISL_838414; EPI_ISL_838415; EPI_ISL_838416; EPI_ISL_838417; EPI_ISL_838418; EPI_ISL_838419; EPI_ISL_838420; EPI_ISL_838421; EPI_ISL_838422; EPI_ISL_838423; EPI_ISL_838424; EPI_ISL_838425; EPI_ISL_838426; EPI_ISL_838427; EPI_ISL_838428; EPI_ISL_838429; EPI_ISL_838430; EPI_ISL_838431; EPI_ISL_838432; EPI_ISL_838433; EPI_ISL_838434; EPI_ISL_838435; EPI_ISL_838436; EPI_ISL_838437; EPI_ISL_838438; EPI_ISL_838439; EPI_ISL_838440; EPI_ISL_838441; EPI_ISL_838442; EPI_ISL_838443; EPI_ISL_838444; EPI_ISL_838445; EPI_ISL_838446; EPI_ISL_838447; EPI_ISL_838448; EPI_ISL_838449; EPI_ISL_838450; EPI_ISL_838451; EPI_ISL_838452; EPI_ISL_838453; EPI_ISL_838454; EPI_ISL_838455; EPI_ISL_838456; EPI_ISL_838457; EPI_ISL_838458; EPI_ISL_838459; EPI_ISL_838460; EPI_ISL_838461; EPI_ISL_838462; EPI_ISL_838463; EPI_ISL_838464; EPI_ISL_838465; EPI_ISL_838466; EPI_ISL_838467; EPI_ISL_838468; EPI_ISL_838469; EPI_ISL_838470; EPI_ISL_838471; EPI_ISL_838472; EPI_ISL_838473; EPI_ISL_838474; EPI_ISL_838475; EPI_ISL_838476; EPI_ISL_838477; EPI_ISL_838478; EPI_ISL_838479; EPI_ISL_838480; EPI_ISL_838481; EPI_ISL_838482; EPI_ISL_838483; EPI_ISL_838484; EPI_ISL_838485; EPI_ISL_838486; EPI_ISL_838487; EPI_ISL_838488; EPI_ISL_838489; EPI_ISL_838490; EPI_ISL_838491; EPI_ISL_838492; EPI_ISL_838493; EPI_ISL_838494; EPI_ISL_838495; EPI_ISL_838496; EPI_ISL_838497; EPI_ISL_838498; EPI_ISL_838499; EPI_ISL_838500; EPI_ISL_838501; EPI_ISL_838502; EPI_ISL_838503; EPI_ISL_838504; EPI_ISL_838505; EPI_ISL_838506; EPI_ISL_838507; EPI_ISL_838510; EPI_ISL_838511; EPI_ISL_838512; EPI_ISL_838513; EPI_ISL_838514; EPI_ISL_838515; EPI_ISL_838516; EPI_ISL_838517; EPI_ISL_838518; EPI_ISL_838519; EPI_ISL_838520; EPI_ISL_838521; EPI_ISL_838522; EPI_ISL_838523; EPI_ISL_838524; EPI_ISL_838525; EPI_ISL_838526; EPI_ISL_838527; EPI_ISL_838528; EPI_ISL_838529; EPI_ISL_838530; EPI_ISL_838531; EPI_ISL_838532; EPI_ISL_838533; EPI_ISL_838534; EPI_ISL_838535; EPI_ISL_838536; EPI_ISL_838537; EPI_ISL_838538; EPI_ISL_838539; EPI_ISL_838540; EPI_ISL_838541; EPI_ISL_838542; EPI_ISL_838543; EPI_ISL_838544; EPI_ISL_838545; EPI_ISL_838546; EPI_ISL_838547; EPI_ISL_838548; EPI_ISL_838549; EPI_ISL_838550; EPI_ISL_838551; EPI_ISL_838552; EPI_ISL_838553; EPI_ISL_838554; EPI_ISL_838555; EPI_ISL_838556; EPI_ISL_838557; EPI_ISL_838558; EPI_ISL_838559; EPI_ISL_838560; EPI_ISL_838561; EPI_ISL_838562; EPI_ISL_838563; EPI_ISL_838564; EPI_ISL_838565; EPI_ISL_838566; EPI_ISL_838567; EPI_ISL_838568; EPI_ISL_838569; EPI_ISL_838570; EPI_ISL_838571; EPI_ISL_838572; EPI_ISL_838573; EPI_ISL_838574; EPI_ISL_838575; EPI_ISL_838576; EPI_ISL_838577; EPI_ISL_838578; EPI_ISL_838579; EPI_ISL_838580; EPI_ISL_838581; EPI_ISL_838582; EPI_ISL_838583; EPI_ISL_838584; EPI_ISL_838585; EPI_ISL_838586; EPI_ISL_838587; EPI_ISL_838588; EPI_ISL_838589; EPI_ISL_838590; EPI_ISL_838591; EPI_ISL_838592; EPI_ISL_838593; EPI_ISL_838594; EPI_ISL_838595; EPI_ISL_838596; EPI_ISL_838597; EPI_ISL_838598; EPI_ISL_838599; EPI_ISL_838600; EPI_ISL_838601; EPI_ISL_838602; EPI_ISL_838603; EPI_ISL_838604; EPI_ISL_838605; EPI_ISL_838606; EPI_ISL_838607; EPI_ISL_838608; EPI_ISL_838609; EPI_ISL_838610; EPI_ISL_838611; EPI_ISL_838612; EPI_ISL_838613; EPI_ISL_838614; EPI_ISL_838615; EPI_ISL_838616; EPI_ISL_838617; EPI_ISL_838618; EPI_ISL_838619; EPI_ISL_838620; EPI_ISL_838621; EPI_ISL_838622; EPI_ISL_838623; EPI_ISL_838624; EPI_ISL_838625; EPI_ISL_838626; EPI_ISL_838627; EPI_ISL_838628; EPI_ISL_838629; EPI_ISL_838630; EPI_ISL_838631; EPI_ISL_838632; EPI_ISL_838633; EPI_ISL_838634; EPI_ISL_838635; EPI_ISL_838636; EPI_ISL_838637; EPI_ISL_838638; EPI_ISL_838639; EPI_ISL_838640; EPI_ISL_838641; EPI_ISL_838642; EPI_ISL_838643; EPI_ISL_838644; EPI_ISL_838645; EPI_ISL_838646; EPI_ISL_838647; EPI_ISL_838648; EPI_ISL_838649; EPI_ISL_838650; EPI_ISL_838651; EPI_ISL_838652; EPI_ISL_838653; EPI_ISL_838654; EPI_ISL_838655; EPI_ISL_838656; EPI_ISL_838657; EPI_ISL_838658; EPI_ISL_838659; EPI_ISL_838660; EPI_ISL_838661; EPI_ISL_838662; EPI_ISL_838663; EPI_ISL_838664; EPI_ISL_838665; EPI_ISL_838666; EPI_ISL_838667; EPI_ISL_838668; EPI_ISL_838669; EPI_ISL_838670; EPI_ISL_838671; EPI_ISL_838672 | University of Edinburgh<br>Virology Department, Royal Infirmary of Edinburgh, NHS Lothian / School of Biological Sciences, University of Edinburgh / Institute of Molecular Medicine, University of Edinburgh<br>University of Exeter<br>Queen's Medical Centre, Clinical Microbiology Department / DeepSeq Nottingham<br>COVID-19 Genomics UK (COG-UK) Consortium<br>COVID-19 Genomics UK (COG-UK) Consortium<br>COVID-19 Genomics UK (COG-UK) Consortium<br>COVID-19 Genomics UK (COG-UK) Consortium<br>PHE Covid Sequencing Team | COVID-19 Genomics UK (COG-UK) Consortium<br>COVID-19 Genomics UK (COG-UK) Consortium<br>COVID-19 Genomics UK (COG-UK) Consortium<br>COVID-19 Genomics UK (COG-UK) Consortium<br>PHE Covid Sequencing Team | Gemma Clark, Wendy Smith, Manjinder Khakh, Vicki M Fleming, Michelle M Lister, Hannah Howson-Wells, Jonathan Dall, Patrick McCure, Joseph Chappell, Theocharis Tsoloidis, Nadine Holmes, Matthew Carlisle, Christopher Moore, Fai Sang, Johnny Deleve, Victoria Wright, Matthew Looise                                                                            |



EPI\_ISL\_841764, EPI\_ISL\_841767, EPI\_ISL\_841771, EPI\_ISL\_841778, EPI\_ISL\_841786, EPI\_ISL\_841791, EPI\_ISL\_841797, EPI\_ISL\_841846, EPI\_ISL\_841850, EPI\_ISL\_841866, EPI\_ISL\_841871, EPI\_ISL\_841904, EPI\_ISL\_841908, EPI\_ISL\_841912, EPI\_ISL\_841917, EPI\_ISL\_841922, EPI\_ISL\_841928, EPI\_ISL\_841940, EPI\_ISL\_841941, EPI\_ISL\_841955, EPI\_ISL\_841989, EPI\_ISL\_841994, EPI\_ISL\_842033, EPI\_ISL\_842042, EPI\_ISL\_842049, EPI\_ISL\_842059, EPI\_ISL\_842064  
see above  
Centre for Enzyme Innovation, University of Portsmouth /  
Translational Research Laboratory, Portsmouth Hospitals  
NHS Trust  
EPI\_ISL\_842105  
Quadrum Institute Bioscience  
COVID-19 Genomics UK (COG-UK) Consortium  
Angela Beckett, Yann Bourgeois, Garry Scarlett, Sharon Glaysher, Scott Elliott, Kelly Dicknell, Robert Impuy, Alyson Lloyd, Sarah Wylie, Ethan Butcher, Anoop Chaitan, Sammel Hoosen  
EPI\_ISL\_842123, EPI\_ISL\_842124, EPI\_ISL\_842126, EPI\_ISL\_842128, EPI\_ISL\_842138, EPI\_ISL\_842140, EPI\_ISL\_842144, EPI\_ISL\_842151, EPI\_ISL\_842152, EPI\_ISL\_842154, EPI\_ISL\_842156, EPI\_ISL\_842159, EPI\_ISL\_842162, EPI\_ISL\_842163, EPI\_ISL\_842167, EPI\_ISL\_842169, EPI\_ISL\_842171, EPI\_ISL\_842178, EPI\_ISL\_842186, EPI\_ISL\_842187, EPI\_ISL\_842191, EPI\_ISL\_842192, EPI\_ISL\_842194, EPI\_ISL\_842195, EPI\_ISL\_842200  
see above  
Oxford Virotics, NDM, University of Oxford, Oxford University  
Hospitals, Basings Stoke and North Hampshire Hospital  
Tanya Golubchik, David Bonsal, George McIntyre, Amy Teebse, Mariateresa de Casera, Cairn Moore, Alex Mobbs, Anila Justice, Robert Shaw, Monique Anderson, Timothy P'ao, Emma Vase, Nathan Moore, Jessica Lynch, Nick Cortes, Maléide Mori, Stephen Kidd, David Buck, John Todd, Christophe Fraser  
EPI\_ISL\_842201, EPI\_ISL\_842205, EPI\_ISL\_842209, EPI\_ISL\_842218, EPI\_ISL\_842219, EPI\_ISL\_842222, EPI\_ISL\_842226, EPI\_ISL\_842228, EPI\_ISL\_842230, EPI\_ISL\_842231, EPI\_ISL\_842233, EPI\_ISL\_842234, EPI\_ISL\_842256, EPI\_ISL\_842257, EPI\_ISL\_842259, EPI\_ISL\_842261, EPI\_ISL\_842262, EPI\_ISL\_842263, EPI\_ISL\_842264, EPI\_ISL\_842265, EPI\_ISL\_842266, EPI\_ISL\_842267, EPI\_ISL\_842268, EPI\_ISL\_842272, EPI\_ISL\_842281, EPI\_ISL\_842282, EPI\_ISL\_842288, EPI\_ISL\_842289, EPI\_ISL\_842290, EPI\_ISL\_842295, EPI\_ISL\_842300, EPI\_ISL\_842306, EPI\_ISL\_842307, EPI\_ISL\_842311, EPI\_ISL\_842313, EPI\_ISL\_842314, EPI\_ISL\_842315, EPI\_ISL\_842316, EPI\_ISL\_842317, EPI\_ISL\_842318, EPI\_ISL\_842319, EPI\_ISL\_842320, EPI\_ISL\_842328, EPI\_ISL\_842336, EPI\_ISL\_842338, EPI\_ISL\_842340, EPI\_ISL\_842344, EPI\_ISL\_842352  
see above  
Virology Department, Sheffield Teaching Hospitals NHS  
Foundation Trust, Department of Infection, Immunology and  
Cardiovascular Disease, The Medical School, University of  
Sheffield  
Thushan de Silva, Matthew Parker, Nikki Smith, Aditi Argyal, Rebecca Brown, Luke Green, Rachel Tucker, Paul Parsons, Danielle Groves, Katie Johnson,  
Laura Camilleri, Alex Keeley, Dave Partridge, Matthew Wyles, Benjamin Lindsey, Meinert Yawz, Mohammed Raza, Candia Evans  
EPI\_ISL\_842358, EPI\_ISL\_842359, EPI\_ISL\_842366, EPI\_ISL\_842374, EPI\_ISL\_842375, EPI\_ISL\_842379, EPI\_ISL\_842386, EPI\_ISL\_842390, EPI\_ISL\_842391, EPI\_ISL\_842394, EPI\_ISL\_842403, EPI\_ISL\_842409, EPI\_ISL\_842421, EPI\_ISL\_842424, EPI\_ISL\_842438, EPI\_ISL\_842440, EPI\_ISL\_842453, EPI\_ISL\_842479, EPI\_ISL\_842484, EPI\_ISL\_842487, EPI\_ISL\_842489, EPI\_ISL\_842492, EPI\_ISL\_842517, EPI\_ISL\_842520, EPI\_ISL\_842523, EPI\_ISL\_842526, EPI\_ISL\_842529, EPI\_ISL\_842541, EPI\_ISL\_842548, EPI\_ISL\_842552, EPI\_ISL\_842576, EPI\_ISL\_842587, EPI\_ISL\_842589, EPI\_ISL\_842592  
see above  
Bioinformatics and Biostatistics Lab, Advanced Sequencing  
Facility  
Aengus Stewart, Jerome Nicood, Chelsea Sawyer, Laura Chhib, Harshil Patel, Margaret Crawford  
EPI\_ISL\_842560, EPI\_ISL\_842563, EPI\_ISL\_842566, EPI\_ISL\_842572, EPI\_ISL\_842575, EPI\_ISL\_842584, EPI\_ISL\_842589, EPI\_ISL\_842707, EPI\_ISL\_842711, EPI\_ISL\_842714, EPI\_ISL\_842743, EPI\_ISL\_842744, EPI\_ISL\_842749, EPI\_ISL\_842774, EPI\_ISL\_842786, EPI\_ISL\_842788  
see above  
Furst Medical Laboratory  
Norwegian Institute of Public Health, Department of Virology  
Kathrine Stene-Johansen, Kamilla Heddeland, Insetjord, Hilde Einshaug, Aliva R All-Marie Paulsen Madsen, Rasmus Rits Kopperud, Hilde Volian, Karoline  
Bragstad, Olav Hungnes  
EPI\_ISL\_842924, EPI\_ISL\_842932, EPI\_ISL\_842934, EPI\_ISL\_842938, EPI\_ISL\_842943, EPI\_ISL\_842954, EPI\_ISL\_842965, EPI\_ISL\_842967, EPI\_ISL\_842971, EPI\_ISL\_842979, EPI\_ISL\_842982, EPI\_ISL\_842987, EPI\_ISL\_842991, EPI\_ISL\_842994, EPI\_ISL\_843004, EPI\_ISL\_843007, EPI\_ISL\_843010, EPI\_ISL\_843020, EPI\_ISL\_843022, EPI\_ISL\_843029, EPI\_ISL\_843030, EPI\_ISL\_843032, EPI\_ISL\_843033, EPI\_ISL\_843037, EPI\_ISL\_843038, EPI\_ISL\_843040, EPI\_ISL\_843067, EPI\_ISL\_843076, EPI\_ISL\_843077, EPI\_ISL\_843078, EPI\_ISL\_843079, EPI\_ISL\_843083, EPI\_ISL\_843084, EPI\_ISL\_843087, EPI\_ISL\_843097, EPI\_ISL\_843101, EPI\_ISL\_843121  
see above  
Barts Health NHS Trust  
COVID-19 Genomics UK (COG-UK) Consortium  
Judith Heaney, Matthew Byott, Catherine Houlihan, Dan Frampton, Stuart Kirk, Moria Spyer and Elean Nestouli  
EPI\_ISL\_843205, EPI\_ISL\_843208, EPI\_ISL\_843239, EPI\_ISL\_843264, EPI\_ISL\_843292, EPI\_ISL\_843382, EPI\_ISL\_843444, EPI\_ISL\_843456, EPI\_ISL\_843459, EPI\_ISL\_843476, EPI\_ISL\_843523, EPI\_ISL\_843542, EPI\_ISL\_843581, EPI\_ISL\_843630, EPI\_ISL\_843748, EPI\_ISL\_843810, EPI\_ISL\_843863, EPI\_ISL\_843919, EPI\_ISL\_843936, EPI\_ISL\_843938, EPI\_ISL\_844063, EPI\_ISL\_844119, EPI\_ISL\_844228, EPI\_ISL\_844281, EPI\_ISL\_844373, EPI\_ISL\_844416, EPI\_ISL\_844420, EPI\_ISL\_844462, EPI\_ISL\_844469, EPI\_ISL\_844489, EPI\_ISL\_844501, EPI\_ISL\_844520, EPI\_ISL\_844581, EPI\_ISL\_844583, EPI\_ISL\_844588, EPI\_ISL\_844640, EPI\_ISL\_844939, EPI\_ISL\_844939, EPI\_ISL\_844939, EPI\_ISL\_845003, EPI\_ISL\_845003, EPI\_ISL\_845006, EPI\_ISL\_845066, EPI\_ISL\_845107, EPI\_ISL\_845113, EPI\_ISL\_845116, EPI\_ISL\_845121, EPI\_ISL\_845125, EPI\_ISL\_845132, EPI\_ISL\_845148, EPI\_ISL\_845170, EPI\_ISL\_845183, EPI\_ISL\_845189, EPI\_ISL\_845221, EPI\_ISL\_845227, EPI\_ISL\_845232, EPI\_ISL\_845247, EPI\_ISL\_845254, EPI\_ISL\_845271, EPI\_ISL\_845279, EPI\_ISL\_845331, EPI\_ISL\_845341, EPI\_ISL\_845344, EPI\_ISL\_845350, EPI\_ISL\_845360, EPI\_ISL\_845377, EPI\_ISL\_845454, EPI\_ISL\_845527  
see above  
Department of Virus and Microbiological Special Diagnostics,  
Statens Serum Institut, Copenhagen, Denmark  
Alpbjersn Lab, Department of Chemistry and Biocscience,  
Aalborg University, Denmark  
COVID-19 Genomics UK (COG-UK) Consortium  
Rob Howes, The Lighthouse Lab in Cambridge and Alex Alderton, Roberto Amato, Sonia Gonçalves, Ewan Harrison, David K. Jackson, Ian Johnston,  
Dominic Kwiatkowski, Cordelia Langford, John Sillitoe on behalf of the Wellcome Sanger Institute COVID-19 Surveillance Team  
EPI\_ISL\_845934, EPI\_ISL\_846022, EPI\_ISL\_846033, EPI\_ISL\_846180  
see above  
Department of Virus and Microbiological Special Diagnostics,  
Statens Serum Institut, Copenhagen, Denmark  
Alpbjersn Lab, Department of Chemistry and Biocscience,  
Aalborg University, Denmark  
COVID-19 Genomics UK (COG-UK) Consortium  
Jaquelyn Wynn, Mairead Hyland, The Lighthouse Lab in Alderley Park and Alex Alderton, Roberto Amato, Sonia Gonçalves, Ewan Harrison, David K  
Jackson, Ian Johnston, Dominic Kwiatkowski, Cordelia Langford, John Sillitoe on behalf of the Wellcome Sanger Institute COVID-19 Surveillance Team  
EPI\_ISL\_846202, EPI\_ISL\_846206, EPI\_ISL\_846207, EPI\_ISL\_846214, EPI\_ISL\_846217, EPI\_ISL\_846220, EPI\_ISL\_846222, EPI\_ISL\_846223, EPI\_ISL\_846225, EPI\_ISL\_846226, EPI\_ISL\_846230, EPI\_ISL\_846232, EPI\_ISL\_846241, EPI\_ISL\_846242, EPI\_ISL\_846255, EPI\_ISL\_846256, EPI\_ISL\_846259, EPI\_ISL\_846268, EPI\_ISL\_846270, EPI\_ISL\_846272, EPI\_ISL\_846281, EPI\_ISL\_846282, EPI\_ISL\_846283, EPI\_ISL\_846290, EPI\_ISL\_846310, EPI\_ISL\_846312, EPI\_ISL\_846314, EPI\_ISL\_846317, EPI\_ISL\_846318, EPI\_ISL\_846320, EPI\_ISL\_846328, EPI\_ISL\_846332, EPI\_ISL\_846333, EPI\_ISL\_846334, EPI\_ISL\_846336, EPI\_ISL\_846341, EPI\_ISL\_846342, EPI\_ISL\_846343, EPI\_ISL\_846349, EPI\_ISL\_846352, EPI\_ISL\_846358, EPI\_ISL\_846358, EPI\_ISL\_846359, EPI\_ISL\_846375, EPI\_ISL\_846381, EPI\_ISL\_846385, EPI\_ISL\_846393, EPI\_ISL\_846396, EPI\_ISL\_846411, EPI\_ISL\_846412, EPI\_ISL\_846418, EPI\_ISL\_846430, EPI\_ISL\_846432, EPI\_ISL\_846433, EPI\_ISL\_846441, EPI\_ISL\_846442, EPI\_ISL\_846444, EPI\_ISL\_846446, EPI\_ISL\_846451, EPI\_ISL\_846452, EPI\_ISL\_846452, EPI\_ISL\_846453, EPI\_ISL\_846454, EPI\_ISL\_846454, EPI\_ISL\_846467, EPI\_ISL\_846475, EPI\_ISL\_846477, EPI\_ISL\_846484, EPI\_ISL\_846487, EPI\_ISL\_846488, EPI\_ISL\_846490, EPI\_ISL\_846491, EPI\_ISL\_846492, EPI\_ISL\_846493, EPI\_ISL\_846504, EPI\_ISL\_846504, EPI\_ISL\_846505, EPI\_ISL\_846510  
see above  
Lighthouse Lab in Alderley Park  
Wellcome Sanger Institute for the COVID-19 Genomics UK  
(COG-UK) Consortium  
Daniel J. Jackson, Sonia Gonçalves, Ewan Harrison, David K  
Jackson, Ian Johnston, Dominic Kwiatkowski, Cordelia Langford, John Sillitoe on behalf of the Wellcome Sanger Institute COVID-19 Surveillance Team  
EPI\_ISL\_846529, EPI\_ISL\_846533  
see above  
Lighthouse Lab in Glasgow  
Wellcome Sanger Institute for the COVID-19 Genomics UK  
(COG-UK) Consortium  
Harpreet VanSteenhouzen, Yurni Kasal, David Gray, Carol Clogston, Anna Dominiczak and Alex Alderton, Roberto Amato, Sonia Gonçalves, Ewan Harrison,  
David K. Jackson, Ian Johnston, Dominic Kwiatkowski, Cordelia Langford, John Sillitoe on behalf of the Wellcome Sanger Institute COVID-19 Surveillance  
Team  
EPI\_ISL\_846552, EPI\_ISL\_846557, EPI\_ISL\_846578, EPI\_ISL\_846579  
see above  
Lighthouse Lab in Glasgow  
Wellcome Sanger Institute for the COVID-19 Genomics UK  
(COG-UK) Consortium  
Hannevor Heineinck, Bruno Vernassell  
EPI\_ISL\_846593, EPI\_ISL\_846599  
National Reference Center for Viruses of Respiratory  
Infections, Institut Pasteur, Paris  
Marion Barbet, Sylvie Benhill, Meline Bizard, Angella Bisebeane, Camille Capel, Etienne Simon-Loribe, Vincem Enouf, Maud Vanpee, Sylvie van der  
Went-Fanour Eric  
EPI\_ISL\_846942, EPI\_ISL\_846944, EPI\_ISL\_846946, EPI\_ISL\_847008, EPI\_ISL\_847021, EPI\_ISL\_847029, EPI\_ISL\_847038, EPI\_ISL\_847086, EPI\_ISL\_847116, EPI\_ISL\_847124, EPI\_ISL\_847177, EPI\_ISL\_847270, EPI\_ISL\_847383, EPI\_ISL\_847390, EPI\_ISL\_847399, EPI\_ISL\_847405, EPI\_ISL\_847423, EPI\_ISL\_847438, EPI\_ISL\_847475, EPI\_ISL\_847485  
see above  
Department of Virus and Microbiological Special Diagnostics,  
Statens Serum Institut, Copenhagen, Denmark  
HUG, Laboratory of Virology and the Health2030 Genome  
Center  
Samuel Corday, Ana Rita Gonçalves, Laurent Kaiser, Lorenzo Cerulli, Henri Pegoff, Melyssa Elias, Keith Hashman, Ioannis Xenarios, Emmanuel  
Dermizakis  
EPI\_ISL\_847859, EPI\_ISL\_847882, EPI\_ISL\_847906, EPI\_ISL\_847910, EPI\_ISL\_847918, EPI\_ISL\_847954, EPI\_ISL\_847976, EPI\_ISL\_847977  
CHU Purpan - Laboratoire de Virologie - Institut Fédératif de  
Biologie  
Lator J., Rancier N., Dubois M., Carcenac R., Harter A., Boyer P., Tremeauux P., Izopet J.  
EPI\_ISL\_848005, EPI\_ISL\_848006, EPI\_ISL\_848007, EPI\_ISL\_848008  
Public Health Virology Laboratory, Forensic and Scientific  
Services (PVV-FSS)  
EPI\_ISL\_849727  
Public Health Virology Laboratory, Forensic and Scientific  
Services (PVV-FSS)  
EPI\_ISL\_849736, EPI\_ISL\_849804, EPI\_ISL\_849817, EPI\_ISL\_849826, EPI\_ISL\_849828, EPI\_ISL\_849838  
A Kumbholz, Labor Dr. Krause und Kollegen MVZ GmbH,  
Kiel  
Charité Universitätsmedizin Berlin, Institut für Virologie  
Victor M Corman, Jörn Behneim-Schwarzbach, Tathia Veith, Julia Schneider, Tobias Blecker, Julia Tesch, Barbara Mühlemann, Terry Jones, Christian  
Drosien







|                                                                                                                                                                                                                                                                |                                                                                                                                                                                                                                                                                                                          |                                                                                                                                                                                                                                                                                                                                   |                                                                                                                                                                                                                                                                                                                                                                                                                                                                                                                                                                                                                                                                                                                                                                                                                                                                                               |
|----------------------------------------------------------------------------------------------------------------------------------------------------------------------------------------------------------------------------------------------------------------|--------------------------------------------------------------------------------------------------------------------------------------------------------------------------------------------------------------------------------------------------------------------------------------------------------------------------|-----------------------------------------------------------------------------------------------------------------------------------------------------------------------------------------------------------------------------------------------------------------------------------------------------------------------------------|-----------------------------------------------------------------------------------------------------------------------------------------------------------------------------------------------------------------------------------------------------------------------------------------------------------------------------------------------------------------------------------------------------------------------------------------------------------------------------------------------------------------------------------------------------------------------------------------------------------------------------------------------------------------------------------------------------------------------------------------------------------------------------------------------------------------------------------------------------------------------------------------------|
| EPI_ISL_855563, EPI_ISL_855566, EPI_ISL_855570, EPI_ISL_855572                                                                                                                                                                                                 | Department of Virology, Principal Military Hospital of Tunisia<br>Lab. Microbiologia e Virologia, Colugno, A.O. del Coll                                                                                                                                                                                                 | Bundeswehr Institute of Microbiology<br>Lab. Microbiologia e Virologia, Colugno, A.O. del Coll                                                                                                                                                                                                                                    | Susanne Handrick, Malena Besthorn-Willmann, Simone Eckstein, Mathias C. Walter, Markus H. Ammerpenn, Hatiba Najla, Kilian Stoedcker, Roman Wölfel & Mohamed Ben Mousssa                                                                                                                                                                                                                                                                                                                                                                                                                                                                                                                                                                                                                                                                                                                       |
| EPI_ISL_855615, EPI_ISL_855620, EPI_ISL_855635, EPI_ISL_855647, EPI_ISL_855654, EPI_ISL_855660, EPI_ISL_855665, EPI_ISL_855685, EPI_ISL_855689, EPI_ISL_855731, EPI_ISL_855745, EPI_ISL_855751, EPI_ISL_855752                                                 | Department of Virology, Principal Military Hospital of Tunisia<br>Lab. Microbiologia e Virologia, Colugno, A.O. del Coll<br>Statens Serum Institut, Copenhagen, Denmark<br>Department of Virology, National Centre for Infectious Diseases<br>National Public Health Laboratory, National Centre for Infectious Diseases | Aalborg University<br>Lab. Microbiologia e Virologia, Colugno, A.O. del Coll<br>GIGA Medical Genomics<br>New York City Public Health Laboratory<br>National Public Health Laboratory, National Centre for Infectious Diseases<br>Swiss National Reference Centre for Influenza                                                    | Liligi Atirpaldi, Claudia Tiberio, Anna Peretti<br>Luigi Atirpaldi, Claudia Tiberio, Anna Peretti<br>Keith Durkin, Maria Atesi, Sébastien Bonniers, Raphaël Bouvier, Bouchna Boujemla, Cécile Meay, Pierrette Melin, Marie-Pierre Hayette, Vincent Bours<br>Tze Minn Mak, Sophie Octavia, Zhenyong Zhou, Lin Cui, Raymond Tze Pin Lin<br>Ana Rita Gonçalves, Samuel Cordey, Laurent Kaiser, Lorenzo Cerutti, Henri Peged, Malysa Elies, Keith Harshman, Ioannis Xenarios, Emmanouil Dermitsakis                                                                                                                                                                                                                                                                                                                                                                                               |
| EPI_ISL_855749, EPI_ISL_857494, EPI_ISL_857501, EPI_ISL_857505, EPI_ISL_857510, EPI_ISL_857512                                                                                                                                                                 | Swiss National Reference Centre for Influenza                                                                                                                                                                                                                                                                            | Swiss National Reference Centre for Influenza                                                                                                                                                                                                                                                                                     | Tim Rudolf, Ana Rita Gonçalves, Madlen Stange, Helena M. Seb-Smith, Alfredo Mari, Karoline Leuzinger, Julia Batlicki, Manuel Battegay, Hans Hirsch, Laurent Kaiser, Adrian Egli                                                                                                                                                                                                                                                                                                                                                                                                                                                                                                                                                                                                                                                                                                               |
| EPI_ISL_857548, EPI_ISL_857550, EPI_ISL_857565, EPI_ISL_857579, EPI_ISL_857597, EPI_ISL_857631, EPI_ISL_857647, EPI_ISL_857656, EPI_ISL_857680, EPI_ISL_857696, EPI_ISL_857700, EPI_ISL_857704, EPI_ISL_857726, EPI_ISL_857730, EPI_ISL_857784, EPI_ISL_857817 | see above<br>Lighthouse Lab in Cambridge<br>Lighthouse Lab in Glasgow<br>Lighthouse Lab in Glasgow<br>Lighthouse Lab in Glasgow<br>Lighthouse Lab in Glasgow                                                                                                                                                             | see above<br>Wellcome Sanger Institute for the COVID-19 Genomics UK (COG-UK) Consortium<br>Wellcome Sanger Institute for the COVID-19 Genomics UK (COG-UK) Consortium<br>Wellcome Sanger Institute for the COVID-19 Genomics UK (COG-UK) Consortium<br>Wellcome Sanger Institute for the COVID-19 Genomics UK (COG-UK) Consortium | Rob Howes, The Lighthouse Lab in Cambridge and Alex Alderton, Roberto Amato, Sonia Gonçalves, Ewan Harrison, David K. Jackson, Ian Johnston, Dominic Kwiatkowski, Cordelia Langford, John Sillitoe on behalf of the Wellcome Sanger Institute COVID-19 Surveillance Team<br>Harper VanSteenhouse, Yurni Kasal, David Gray, Carol Clugston, Anna Dominiczak and Alex Alderton, Roberto Amato, Sonia Gonçalves, Ewan Harrison, David K. Jackson, Ian Johnston, Dominic Kwiatkowski, Cordelia Langford, John Sillitoe on behalf of the Wellcome Sanger Institute COVID-19 Surveillance Team<br>Jacquelyn Wynn, Mairead Hyland, The Lighthouse Lab in Alderley Park and Alex Alderton, Roberto Amato, Sonia Gonçalves, Ewan Harrison, David K. Jackson, Ian Johnston, Dominic Kwiatkowski, Cordelia Langford, John Sillitoe on behalf of the Wellcome Sanger Institute COVID-19 Surveillance Team |
| EPI_ISL_857892, EPI_ISL_857899, EPI_ISL_857901, EPI_ISL_857907, EPI_ISL_857921, EPI_ISL_857935, EPI_ISL_857951, EPI_ISL_857956                                                                                                                                 | see above<br>Lighthouse Lab in Glasgow<br>Lighthouse Lab in Glasgow                                                                                                                                                                                                                                                      | see above<br>Wellcome Sanger Institute for the COVID-19 Genomics UK (COG-UK) Consortium<br>Wellcome Sanger Institute for the COVID-19 Genomics UK (COG-UK) Consortium                                                                                                                                                             | Harper VanSteenhouse, Yurni Kasal, David Gray, Carol Clugston, Anna Dominiczak and Alex Alderton, Roberto Amato, Sonia Gonçalves, Ewan Harrison, David K. Jackson, Ian Johnston, Dominic Kwiatkowski, Cordelia Langford, John Sillitoe on behalf of the Wellcome Sanger Institute COVID-19 Surveillance Team<br>David K. Jackson, Ian Johnston, Dominic Kwiatkowski, Cordelia Langford, John Sillitoe on behalf of the Wellcome Sanger Institute COVID-19 Surveillance Team                                                                                                                                                                                                                                                                                                                                                                                                                   |
| EPI_ISL_857965, EPI_ISL_857981, EPI_ISL_857982, EPI_ISL_857994, EPI_ISL_858001, EPI_ISL_858005, EPI_ISL_858008                                                                                                                                                 | see above<br>Lighthouse Lab in Glasgow                                                                                                                                                                                                                                                                                   | see above<br>Wellcome Sanger Institute for the COVID-19 Genomics UK (COG-UK) Consortium                                                                                                                                                                                                                                           | Harper VanSteenhouse, Yurni Kasal, David Gray, Carol Clugston, Anna Dominiczak and Alex Alderton, Roberto Amato, Sonia Gonçalves, Ewan Harrison, David K. Jackson, Ian Johnston, Dominic Kwiatkowski, Cordelia Langford, John Sillitoe on behalf of the Wellcome Sanger Institute COVID-19 Surveillance Team                                                                                                                                                                                                                                                                                                                                                                                                                                                                                                                                                                                  |
| EPI_ISL_858013, EPI_ISL_858016, EPI_ISL_858021, EPI_ISL_858027, EPI_ISL_858034, EPI_ISL_858037, EPI_ISL_858039, EPI_ISL_858042, EPI_ISL_858045, EPI_ISL_858046, EPI_ISL_858047, EPI_ISL_858053, EPI_ISL_858056, EPI_ISL_858062, EPI_ISL_858063                 | see above<br>Lighthouse Lab in Glasgow                                                                                                                                                                                                                                                                                   | see above<br>Wellcome Sanger Institute for the COVID-19 Genomics UK (COG-UK) Consortium                                                                                                                                                                                                                                           | Harper VanSteenhouse, Yurni Kasal, David Gray, Carol Clugston, Anna Dominiczak and Alex Alderton, Roberto Amato, Sonia Gonçalves, Ewan Harrison, David K. Jackson, Ian Johnston, Dominic Kwiatkowski, Cordelia Langford, John Sillitoe on behalf of the Wellcome Sanger Institute COVID-19 Surveillance Team                                                                                                                                                                                                                                                                                                                                                                                                                                                                                                                                                                                  |
| EPI_ISL_858065, EPI_ISL_858069, EPI_ISL_858077, EPI_ISL_858078, EPI_ISL_858083, EPI_ISL_858086, EPI_ISL_858094, EPI_ISL_858097, EPI_ISL_858101, EPI_ISL_858106, EPI_ISL_858110, EPI_ISL_858114, EPI_ISL_858121, EPI_ISL_858125, EPI_ISL_858126, EPI_ISL_858136 | see above<br>Lighthouse Lab in Alderley Park<br>Lighthouse Lab in Glasgow                                                                                                                                                                                                                                                | see above<br>Wellcome Sanger Institute for the COVID-19 Genomics UK (COG-UK) Consortium<br>Wellcome Sanger Institute for the COVID-19 Genomics UK (COG-UK) Consortium                                                                                                                                                             | Harper VanSteenhouse, Yurni Kasal, David Gray, Carol Clugston, Anna Dominiczak and Alex Alderton, Roberto Amato, Sonia Gonçalves, Ewan Harrison, David K. Jackson, Ian Johnston, Dominic Kwiatkowski, Cordelia Langford, John Sillitoe on behalf of the Wellcome Sanger Institute COVID-19 Surveillance Team<br>David K. Jackson, Ian Johnston, Dominic Kwiatkowski, Cordelia Langford, John Sillitoe on behalf of the Wellcome Sanger Institute COVID-19 Surveillance Team<br>Harper VanSteenhouse, Yurni Kasal, David Gray, Carol Clugston, Anna Dominiczak and Alex Alderton, Roberto Amato, Sonia Gonçalves, Ewan Harrison, David K. Jackson, Ian Johnston, Dominic Kwiatkowski, Cordelia Langford, John Sillitoe on behalf of the Wellcome Sanger Institute COVID-19 Surveillance Team                                                                                                   |
| EPI_ISL_858159, EPI_ISL_858161, EPI_ISL_858163, EPI_ISL_858165, EPI_ISL_858169, EPI_ISL_858170, EPI_ISL_858171, EPI_ISL_858189, EPI_ISL_858195, EPI_ISL_858196, EPI_ISL_858200, EPI_ISL_858202                                                                 | see above<br>Lighthouse Lab in Glasgow                                                                                                                                                                                                                                                                                   | see above<br>Wellcome Sanger Institute for the COVID-19 Genomics UK (COG-UK) Consortium                                                                                                                                                                                                                                           | Harper VanSteenhouse, Yurni Kasal, David Gray, Carol Clugston, Anna Dominiczak and Alex Alderton, Roberto Amato, Sonia Gonçalves, Ewan Harrison, David K. Jackson, Ian Johnston, Dominic Kwiatkowski, Cordelia Langford, John Sillitoe on behalf of the Wellcome Sanger Institute COVID-19 Surveillance Team                                                                                                                                                                                                                                                                                                                                                                                                                                                                                                                                                                                  |
| EPI_ISL_858224, EPI_ISL_858225, EPI_ISL_858226, EPI_ISL_858227, EPI_ISL_858228, EPI_ISL_858229, EPI_ISL_858232, EPI_ISL_858237, EPI_ISL_858302, EPI_ISL_858310, EPI_ISL_858312, EPI_ISL_858315, EPI_ISL_858319, EPI_ISL_858335, EPI_ISL_858342                 | see above<br>Lighthouse Lab in Glasgow                                                                                                                                                                                                                                                                                   | see above<br>Wellcome Sanger Institute for the COVID-19 Genomics UK (COG-UK) Consortium                                                                                                                                                                                                                                           | Harper VanSteenhouse, Yurni Kasal, David Gray, Carol Clugston, Anna Dominiczak and Alex Alderton, Roberto Amato, Sonia Gonçalves, Ewan Harrison, David K. Jackson, Ian Johnston, Dominic Kwiatkowski, Cordelia Langford, John Sillitoe on behalf of the Wellcome Sanger Institute COVID-19 Surveillance Team                                                                                                                                                                                                                                                                                                                                                                                                                                                                                                                                                                                  |
| EPI_ISL_858350, EPI_ISL_858355, EPI_ISL_858356, EPI_ISL_858361, EPI_ISL_858365, EPI_ISL_858380                                                                                                                                                                 | see above<br>Lighthouse Lab in Glasgow                                                                                                                                                                                                                                                                                   | see above<br>Wellcome Sanger Institute for the COVID-19 Genomics UK (COG-UK) Consortium                                                                                                                                                                                                                                           | Harper VanSteenhouse, Yurni Kasal, David Gray, Carol Clugston, Anna Dominiczak and Alex Alderton, Roberto Amato, Sonia Gonçalves, Ewan Harrison, David K. Jackson, Ian Johnston, Dominic Kwiatkowski, Cordelia Langford, John Sillitoe on behalf of the Wellcome Sanger Institute COVID-19 Surveillance Team                                                                                                                                                                                                                                                                                                                                                                                                                                                                                                                                                                                  |
| EPI_ISL_858382                                                                                                                                                                                                                                                 | Lighthouse Lab in Alderley Park                                                                                                                                                                                                                                                                                          | Wellcome Sanger Institute for the COVID-19 Genomics UK (COG-UK) Consortium                                                                                                                                                                                                                                                        | Jacquelyn Wynn, Mairead Hyland, The Lighthouse Lab in Alderley Park and Alex Alderton, Roberto Amato, Sonia Gonçalves, Ewan Harrison, David K. Jackson, Ian Johnston, Dominic Kwiatkowski, Cordelia Langford, John Sillitoe on behalf of the Wellcome Sanger Institute COVID-19 Surveillance Team                                                                                                                                                                                                                                                                                                                                                                                                                                                                                                                                                                                             |
| EPI_ISL_858391                                                                                                                                                                                                                                                 | Lighthouse Lab in Glasgow                                                                                                                                                                                                                                                                                                | Wellcome Sanger Institute for the COVID-19 Genomics UK (COG-UK) Consortium                                                                                                                                                                                                                                                        | Jacquelyn Wynn, Mairead Hyland, The Lighthouse Lab in Alderley Park and Alex Alderton, Roberto Amato, Sonia Gonçalves, Ewan Harrison, David K. Jackson, Ian Johnston, Dominic Kwiatkowski, Cordelia Langford, John Sillitoe on behalf of the Wellcome Sanger Institute COVID-19 Surveillance Team                                                                                                                                                                                                                                                                                                                                                                                                                                                                                                                                                                                             |
| EPI_ISL_858393                                                                                                                                                                                                                                                 | Lighthouse Lab in Alderley Park                                                                                                                                                                                                                                                                                          | Wellcome Sanger Institute for the COVID-19 Genomics UK (COG-UK) Consortium                                                                                                                                                                                                                                                        | Jacquelyn Wynn, Mairead Hyland, The Lighthouse Lab in Alderley Park and Alex Alderton, Roberto Amato, Sonia Gonçalves, Ewan Harrison, David K. Jackson, Ian Johnston, Dominic Kwiatkowski, Cordelia Langford, John Sillitoe on behalf of the Wellcome Sanger Institute COVID-19 Surveillance Team                                                                                                                                                                                                                                                                                                                                                                                                                                                                                                                                                                                             |
| EPI_ISL_858396, EPI_ISL_858398                                                                                                                                                                                                                                 | Lighthouse Lab in Glasgow                                                                                                                                                                                                                                                                                                | Wellcome Sanger Institute for the COVID-19 Genomics UK (COG-UK) Consortium                                                                                                                                                                                                                                                        | Harper VanSteenhouse, Yurni Kasal, David Gray, Carol Clugston, Anna Dominiczak and Alex Alderton, Roberto Amato, Sonia Gonçalves, Ewan Harrison, David K. Jackson, Ian Johnston, Dominic Kwiatkowski, Cordelia Langford, John Sillitoe on behalf of the Wellcome Sanger Institute COVID-19 Surveillance Team                                                                                                                                                                                                                                                                                                                                                                                                                                                                                                                                                                                  |
| EPI_ISL_858402, EPI_ISL_858415                                                                                                                                                                                                                                 | Lighthouse Lab in Alderley Park                                                                                                                                                                                                                                                                                          | Wellcome Sanger Institute for the COVID-19 Genomics UK (COG-UK) Consortium                                                                                                                                                                                                                                                        | Jacquelyn Wynn, Mairead Hyland, The Lighthouse Lab in Alderley Park and Alex Alderton, Roberto Amato, Sonia Gonçalves, Ewan Harrison, David K. Jackson, Ian Johnston, Dominic Kwiatkowski, Cordelia Langford, John Sillitoe on behalf of the Wellcome Sanger Institute COVID-19 Surveillance Team                                                                                                                                                                                                                                                                                                                                                                                                                                                                                                                                                                                             |
| EPI_ISL_858416                                                                                                                                                                                                                                                 | Lighthouse Lab in Alderley Park                                                                                                                                                                                                                                                                                          | Wellcome Sanger Institute for the COVID-19 Genomics UK (COG-UK) Consortium                                                                                                                                                                                                                                                        | Jacquelyn Wynn, Mairead Hyland, The Lighthouse Lab in Alderley Park and Alex Alderton, Roberto Amato, Sonia Gonçalves, Ewan Harrison, David K. Jackson, Ian Johnston, Dominic Kwiatkowski, Cordelia Langford, John Sillitoe on behalf of the Wellcome Sanger Institute COVID-19 Surveillance Team                                                                                                                                                                                                                                                                                                                                                                                                                                                                                                                                                                                             |
| EPI_ISL_858417                                                                                                                                                                                                                                                 | Lighthouse Lab in Glasgow                                                                                                                                                                                                                                                                                                | Wellcome Sanger Institute for the COVID-19 Genomics UK (COG-UK) Consortium                                                                                                                                                                                                                                                        | Harper VanSteenhouse, Yurni Kasal, David Gray, Carol Clugston, Anna Dominiczak and Alex Alderton, Roberto Amato, Sonia Gonçalves, Ewan Harrison, David K. Jackson, Ian Johnston, Dominic Kwiatkowski, Cordelia Langford, John Sillitoe on behalf of the Wellcome Sanger Institute COVID-19 Surveillance Team                                                                                                                                                                                                                                                                                                                                                                                                                                                                                                                                                                                  |
| EPI_ISL_858418                                                                                                                                                                                                                                                 | Lighthouse Lab in Alderley Park                                                                                                                                                                                                                                                                                          | Wellcome Sanger Institute for the COVID-19 Genomics UK (COG-UK) Consortium                                                                                                                                                                                                                                                        | Jacquelyn Wynn, Mairead Hyland, The Lighthouse Lab in Alderley Park and Alex Alderton, Roberto Amato, Sonia Gonçalves, Ewan Harrison, David K. Jackson, Ian Johnston, Dominic Kwiatkowski, Cordelia Langford, John Sillitoe on behalf of the Wellcome Sanger Institute COVID-19 Surveillance Team                                                                                                                                                                                                                                                                                                                                                                                                                                                                                                                                                                                             |









|                                                                                                                                                                                                                                                                                                                                                                                                                                                                                                                                                                                                                                                                                                                                                                                                                                                                                                                                                                                                                                                                                                                                |                                                                                                  |                                                                                                  |                                                                                                                                                                                                                                                                                                                 |
|--------------------------------------------------------------------------------------------------------------------------------------------------------------------------------------------------------------------------------------------------------------------------------------------------------------------------------------------------------------------------------------------------------------------------------------------------------------------------------------------------------------------------------------------------------------------------------------------------------------------------------------------------------------------------------------------------------------------------------------------------------------------------------------------------------------------------------------------------------------------------------------------------------------------------------------------------------------------------------------------------------------------------------------------------------------------------------------------------------------------------------|--------------------------------------------------------------------------------------------------|--------------------------------------------------------------------------------------------------|-----------------------------------------------------------------------------------------------------------------------------------------------------------------------------------------------------------------------------------------------------------------------------------------------------------------|
| EPI_ISL_860310                                                                                                                                                                                                                                                                                                                                                                                                                                                                                                                                                                                                                                                                                                                                                                                                                                                                                                                                                                                                                                                                                                                 | Unit 17: Influenza & Other Respiratory Viruses, German National Influenza Center                 | Project group Epidemiology of Highly Pathogenic Microorganisms, Robert Koch-Institute            | Andreas Sachse, Grit Schubert, Essia Belarbi, Sebastian Calvignac-Spencer, Thorsten Wolff, Ralf Durwald, Jin-Ye Oh, Marianne Wedde                                                                                                                                                                              |
| EPI_ISL_860639, EPI_ISL_860638, EPI_ISL_860639, EPI_ISL_860661, EPI_ISL_860664, EPI_ISL_860678, EPI_ISL_860679, EPI_ISL_860680, EPI_ISL_860687, EPI_ISL_860697, EPI_ISL_860698, EPI_ISL_860746, EPI_ISL_860759, EPI_ISL_860764, EPI_ISL_860768, EPI_ISL_860771, EPI_ISL_860772                                                                                                                                                                                                                                                                                                                                                                                                                                                                                                                                                                                                                                                                                                                                                                                                                                                 | Respiratory Virus Unit, National Infection Service, Public Health England                        | COVID-19 Genomics UK (COG-UK) Consortium                                                         |                                                                                                                                                                                                                                                                                                                 |
| EPI_ISL_860719, EPI_ISL_860728                                                                                                                                                                                                                                                                                                                                                                                                                                                                                                                                                                                                                                                                                                                                                                                                                                                                                                                                                                                                                                                                                                 | Institute for Infectious Diseases, University of Bern, Switzerland                               | Institute for Infectious Diseases, University of Bern, Switzerland                               | Michel C Koch, Christian Baumann, Miguel A Tarazona Milani, Cora Stegesser, Pascal Bittel, Stephen L Leib, Peter Keller, Franziska Suter-Flinker, Alban Rannette                                                                                                                                                |
| EPI_ISL_860734, EPI_ISL_860735, EPI_ISL_860746, EPI_ISL_860759, EPI_ISL_860764, EPI_ISL_860768, EPI_ISL_860771, EPI_ISL_860772                                                                                                                                                                                                                                                                                                                                                                                                                                                                                                                                                                                                                                                                                                                                                                                                                                                                                                                                                                                                 | Swiss National Reference Centre for Influenza                                                    | Swiss National Reference Centre for Influenza                                                    | Ana Rita Gonçalves Cabecinhas, Samuel Cordey, Florian Laubscher, Christoph Grüting, Laurent Kaiser                                                                                                                                                                                                              |
| EPI_ISL_860784                                                                                                                                                                                                                                                                                                                                                                                                                                                                                                                                                                                                                                                                                                                                                                                                                                                                                                                                                                                                                                                                                                                 | Charité Universitätsmedizin Berlin, Institute of Virology, Charitéplatz 1, 10117 Berlin, Germany | Charité Universitätsmedizin Berlin, Institute of Virology, Charitéplatz 1, 10117 Berlin, Germany | Victor M Corman, Julia Schneider, Jörn Behm-Schwarzbach, Tobias Biecker, Julia Tesch, Barbara Mühlemann, Talitha Veith, Terry Jones, Christian Drosen                                                                                                                                                           |
| EPI_ISL_860794                                                                                                                                                                                                                                                                                                                                                                                                                                                                                                                                                                                                                                                                                                                                                                                                                                                                                                                                                                                                                                                                                                                 | Lab. Microbiologia e Virologia, Colúgno, A.O. del Coll                                           | Lab. Microbiologia e Virologia, Colúgno, A.O. del Coll                                           | Luigi Ataripaldi, Claudia Tiberio, Anna Peretti                                                                                                                                                                                                                                                                 |
| EPI_ISL_860822, EPI_ISL_860825, EPI_ISL_860827, EPI_ISL_860832, EPI_ISL_860897                                                                                                                                                                                                                                                                                                                                                                                                                                                                                                                                                                                                                                                                                                                                                                                                                                                                                                                                                                                                                                                 | CHU Tours - Virologie                                                                            | National Reference Center for Viruses of Respiratory Infections, Institut Pasteur, Paris         | Marion Barbet, Sylvie Behilli, Méline Bizard, Angéla Bisebarre, Camille Capel, Etienne Simon-Lorière, Vincent Enouf, Maud Vanpeepe, Sylvie van der Wert, Gaudy Gréfin Cathenne                                                                                                                                  |
| EPI_ISL_860905, EPI_ISL_860906                                                                                                                                                                                                                                                                                                                                                                                                                                                                                                                                                                                                                                                                                                                                                                                                                                                                                                                                                                                                                                                                                                 | CHU Angers - Dpt des Agents Infectieux                                                           | National Reference Center for Viruses of Respiratory Infections, Institut Pasteur, Paris         | Marion Barbet, Sylvie Behilli, Méline Bizard, Angéla Bisebarre, Camille Capel, Etienne Simon-Lorière, Vincent Enouf, Maud Vanpeepe, Sylvie van der Wert, Ducancele Alexandra                                                                                                                                    |
| EPI_ISL_860909                                                                                                                                                                                                                                                                                                                                                                                                                                                                                                                                                                                                                                                                                                                                                                                                                                                                                                                                                                                                                                                                                                                 | CHU Tours - Virologie                                                                            | National Reference Center for Viruses of Respiratory Infections, Institut Pasteur, Paris         | Marion Barbet, Sylvie Behilli, Méline Bizard, Angéla Bisebarre, Camille Capel, Etienne Simon-Lorière, Vincent Enouf, Maud Vanpeepe, Sylvie van der Wert, Ducancele Alexandra                                                                                                                                    |
| EPI_ISL_860910                                                                                                                                                                                                                                                                                                                                                                                                                                                                                                                                                                                                                                                                                                                                                                                                                                                                                                                                                                                                                                                                                                                 | CH du MANS - Lab. Bio. Moléculaire                                                               | National Reference Center for Viruses of Respiratory Infections, Institut Pasteur, Paris         | Marion Barbet, Sylvie Behilli, Méline Bizard, Angéla Bisebarre, Camille Capel, Etienne Simon-Lorière, Vincent Enouf, Maud Vanpeepe, Sylvie van der Wert, Ducancele Alexandra                                                                                                                                    |
| EPI_ISL_860911, EPI_ISL_860912                                                                                                                                                                                                                                                                                                                                                                                                                                                                                                                                                                                                                                                                                                                                                                                                                                                                                                                                                                                                                                                                                                 | CHU Angers - Dpt des Agents Infectieux                                                           | National Reference Center for Viruses of Respiratory Infections, Institut Pasteur, Paris         | Marion Barbet, Sylvie Behilli, Méline Bizard, Angéla Bisebarre, Camille Capel, Etienne Simon-Lorière, Vincent Enouf, Maud Vanpeepe, Sylvie van der Wert, Ducancele Alexandra                                                                                                                                    |
| EPI_ISL_860919, EPI_ISL_860920, EPI_ISL_860930                                                                                                                                                                                                                                                                                                                                                                                                                                                                                                                                                                                                                                                                                                                                                                                                                                                                                                                                                                                                                                                                                 | CHU de Nantes - Hôtel Dieu - Labo. Virologie                                                     | National Reference Center for Viruses of Respiratory Infections, Institut Pasteur, Paris         | Marion Barbet, Sylvie Behilli, Méline Bizard, Angéla Bisebarre, Camille Capel, Etienne Simon-Lorière, Vincent Enouf, Maud Vanpeepe, Sylvie van der Wert, Ducancele Alexandra                                                                                                                                    |
| EPI_ISL_861236                                                                                                                                                                                                                                                                                                                                                                                                                                                                                                                                                                                                                                                                                                                                                                                                                                                                                                                                                                                                                                                                                                                 | CHU Angers - Dpt des Agents Infectieux                                                           | National Reference Center for Viruses of Respiratory Infections, Institut Pasteur, Paris         | Marion Barbet, Sylvie Behilli, Méline Bizard, Angéla Bisebarre, Camille Capel, Etienne Simon-Lorière, Vincent Enouf, Maud Vanpeepe, Sylvie van der Wert, Ducancele Alexandra                                                                                                                                    |
| EPI_ISL_861511, EPI_ISL_861512, EPI_ISL_861518                                                                                                                                                                                                                                                                                                                                                                                                                                                                                                                                                                                                                                                                                                                                                                                                                                                                                                                                                                                                                                                                                 | ZOTZ KLIMAS MVZ Düsseldorf-Centrum GbR ÜRBAG für Labormedizin, Genetik, Zytologie, Pathologie    | Center of Medical Microbiology, Virology, and Hospital Hygiene, University of Düsseldorf         | Maximilian Damagnez, Alexander Diltney, Ashley-Jane Duplessis, Patrick Finzer, Katrin Hoffmann, Torsten Houwaart, Lisanna Hülse, Malte Kolms Vasconcelos, Marek Korencak, Nadine Lübke, Jessica Nicolai, Klaus Pfeifer, Daniel Strölow, Jörg Trimn, Andreas Walker, Tobias Wienenmann, Rainer Zatz Borges et al |
| EPI_ISL_861526, EPI_ISL_861586, EPI_ISL_861590, EPI_ISL_861591, EPI_ISL_861610, EPI_ISL_861614                                                                                                                                                                                                                                                                                                                                                                                                                                                                                                                                                                                                                                                                                                                                                                                                                                                                                                                                                                                                                                 | Instituto Nacional de Saude (INSA)                                                               | Instituto Nacional de Saude (INSA)                                                               |                                                                                                                                                                                                                                                                                                                 |
| EPI_ISL_861773, EPI_ISL_861774, EPI_ISL_861775, EPI_ISL_861777, EPI_ISL_861778, EPI_ISL_861779, EPI_ISL_861781, EPI_ISL_861783, EPI_ISL_861785, EPI_ISL_861786, EPI_ISL_861788, EPI_ISL_861789, EPI_ISL_861790, EPI_ISL_861791, EPI_ISL_861792, EPI_ISL_861794, EPI_ISL_861795, EPI_ISL_861796, EPI_ISL_861797, EPI_ISL_861798, EPI_ISL_861799, EPI_ISL_861800, EPI_ISL_861801, EPI_ISL_861802, EPI_ISL_861803, EPI_ISL_861805, EPI_ISL_861806, EPI_ISL_861807, EPI_ISL_861808, EPI_ISL_861810, EPI_ISL_861811, EPI_ISL_861812, EPI_ISL_861813, EPI_ISL_861814, EPI_ISL_861815, EPI_ISL_861816, EPI_ISL_861817, EPI_ISL_861818, EPI_ISL_861819, EPI_ISL_861820, EPI_ISL_861821, EPI_ISL_861822, EPI_ISL_861823, EPI_ISL_861824, EPI_ISL_861825, EPI_ISL_861826, EPI_ISL_861828, EPI_ISL_861830, EPI_ISL_861831, EPI_ISL_861832, EPI_ISL_861833, EPI_ISL_861834, EPI_ISL_861835, EPI_ISL_861836, EPI_ISL_861837, EPI_ISL_861838, EPI_ISL_861841, EPI_ISL_861842, EPI_ISL_861843, EPI_ISL_861844, EPI_ISL_861845, EPI_ISL_861846, EPI_ISL_861847, EPI_ISL_861848, EPI_ISL_861850, EPI_ISL_861851, EPI_ISL_861852, EPI_ISL_861855 | Hospital General Universitario Gregorio Marañón                                                  | SeqCOVID-SPAIN consortium/IBV(CSIC)                                                              | Dario Garcia de Viedma, Laura Perez-Lago, Pedro J Sola-Campoy, Sergio Bunesateb-Serrano, Maria Herranz, Victor Manuel de la Cueva, Julia Suárez, Pilar Catalan, Patricia Muñoz and SeqCOVID-SPAIN consortium                                                                                                    |
| see above                                                                                                                                                                                                                                                                                                                                                                                                                                                                                                                                                                                                                                                                                                                                                                                                                                                                                                                                                                                                                                                                                                                      |                                                                                                  |                                                                                                  |                                                                                                                                                                                                                                                                                                                 |
| EPI_ISL_862789                                                                                                                                                                                                                                                                                                                                                                                                                                                                                                                                                                                                                                                                                                                                                                                                                                                                                                                                                                                                                                                                                                                 | Cancer Biology Department, National Cancer Institute                                             | Cancer Biology Department, National Cancer Institute                                             | Zekri, A.N., Sedawy, M.G., Ahmed, O.S., Hafez, M.M., Soliman, H.K., Bahnassy, A.A., Elmohty, F.W., Gad, A.E., Hamdy, M.S., Soliman, M.S., Soliman, L., Abouelhadia, M.                                                                                                                                          |



|                                                                                                |                                                                                                                                                                                                |                                                                            |                                                                                                                                                                                                                                                                                                                                                                                                                                                                                                                                                                                                                                                                                   |
|------------------------------------------------------------------------------------------------|------------------------------------------------------------------------------------------------------------------------------------------------------------------------------------------------|----------------------------------------------------------------------------|-----------------------------------------------------------------------------------------------------------------------------------------------------------------------------------------------------------------------------------------------------------------------------------------------------------------------------------------------------------------------------------------------------------------------------------------------------------------------------------------------------------------------------------------------------------------------------------------------------------------------------------------------------------------------------------|
| EPI_ISL_702485                                                                                 | Lighthouse Lab in Adeley Park                                                                                                                                                                  | Wellcome Sanger Institute for the COVID-19 Genomics UK (COG-UK) Consortium | Jacquelyn Wynn, Mairead Hyland, The Lighthouse Lab in Adeley Park and Alex Alderton, Roberto Anado, Sonia Goncalves, Ewan Harrison, David K. Jackson, Ian Johnston, Dominic Kwiatkowski, Cordelia Langford, John Sillito on behalf of the Wellcome Sanger Institute COVID-19 Surveillance Team                                                                                                                                                                                                                                                                                                                                                                                    |
| EPI_ISL_702487                                                                                 | Virology Department, Sheffield Teaching Hospitals NHS Foundation Trust, Department of Infection, Immunity and Cardiovascular Disease, The Medical School, University of Sheffield              | COVID-19 Genomics UK (COG-UK) Consortium                                   | Benjamin, Eleanor G Bentley, Anu Chawla, Jordan J Clark, Angela Cowell, Richard Eccles, Isabel Garcia-Donval, Matthew Gemmill, Alessandro Gerada, PFR Gilmore, Richard Gregory, Ximeng Han, Catherine Hartley, Margaret Hughes, Miran Ilturza-Gomara, James Johnson, L Liu, Jennifer Manson, Charlotte Nelson, Elaine O'Toole, Cassie Oriadeji, Rebekah Penrice-Handal, Lucile Rahnov, N P Randle, Trevor Ian Robinson, Parul Sharma, Ghada T Shawil, James P Stewart, Neil Swainson, Ecaterina Varnos, Joanne Waihs, Mark Whitehead                                                                                                                                              |
| EPI_ISL_702489, EPI_ISL_702491, EPI_ISL_702494, EPI_ISL_702502                                 | Lighthouse Lab in Adeley Park                                                                                                                                                                  | Wellcome Sanger Institute for the COVID-19 Genomics UK (COG-UK) Consortium | Jacquelyn Wynn, Mairead Hyland, The Lighthouse Lab in Adeley Park and Alex Alderton, Roberto Anado, Sonia Goncalves, Ewan Harrison, David K. Jackson, Ian Johnston, Dominic Kwiatkowski, Cordelia Langford, John Sillito on behalf of the Wellcome Sanger Institute COVID-19 Surveillance Team                                                                                                                                                                                                                                                                                                                                                                                    |
| EPI_ISL_702505                                                                                 | Northumbria University / South Tees Hospitals NHS Foundation Trust / North Tees and Hartlepool NHS Foundation Trust / Newcastle Hospitals NHS Foundation Trust                                 | COVID-19 Genomics UK (COG-UK) Consortium                                   | Jacquelyn Wynn, Mairead Hyland, The Lighthouse Lab in Adeley Park and Alex Alderton, Roberto Anado, Sonia Goncalves, Ewan Harrison, David K. Jackson, Ian Johnston, Dominic Kwiatkowski, Cordelia Langford, John Sillito on behalf of the Wellcome Sanger Institute COVID-19 Surveillance Team                                                                                                                                                                                                                                                                                                                                                                                    |
| EPI_ISL_702506                                                                                 | Lighthouse Lab in Adeley Park                                                                                                                                                                  | Wellcome Sanger Institute for the COVID-19 Genomics UK (COG-UK) Consortium | Jacquelyn Wynn, Mairead Hyland, The Lighthouse Lab in Adeley Park and Alex Alderton, Roberto Anado, Sonia Goncalves, Ewan Harrison, David K. Jackson, Ian Johnston, Dominic Kwiatkowski, Cordelia Langford, John Sillito on behalf of the Wellcome Sanger Institute COVID-19 Surveillance Team                                                                                                                                                                                                                                                                                                                                                                                    |
| EPI_ISL_702507                                                                                 | University College London Hospital                                                                                                                                                             | COVID-19 Genomics UK (COG-UK) Consortium                                   | Jacquelyn Wynn, Mairead Hyland, The Lighthouse Lab in Adeley Park and Alex Alderton, Roberto Anado, Sonia Goncalves, Ewan Harrison, David K. Jackson, Ian Johnston, Dominic Kwiatkowski, Cordelia Langford, John Sillito on behalf of the Wellcome Sanger Institute COVID-19 Surveillance Team                                                                                                                                                                                                                                                                                                                                                                                    |
| EPI_ISL_702509, EPI_ISL_702511, EPI_ISL_702516, EPI_ISL_702517, EPI_ISL_702521, EPI_ISL_702522 | Lighthouse Lab in Adeley Park                                                                                                                                                                  | Wellcome Sanger Institute for the COVID-19 Genomics UK (COG-UK) Consortium | Jacquelyn Wynn, Mairead Hyland, The Lighthouse Lab in Adeley Park and Alex Alderton, Roberto Anado, Sonia Goncalves, Ewan Harrison, David K. Jackson, Ian Johnston, Dominic Kwiatkowski, Cordelia Langford, John Sillito on behalf of the Wellcome Sanger Institute COVID-19 Surveillance Team                                                                                                                                                                                                                                                                                                                                                                                    |
| EPI_ISL_702523                                                                                 | Liverpool Clinical Laboratories                                                                                                                                                                | COVID-19 Genomics UK (COG-UK) Consortium                                   | Sam Hadenby, Anita Luczai, Steve Paterson, Julian Hiscox, Alistair Darty, M Amsaud, A Alvezahi, Muhammad Alruwail, Stuart D Armstrong, Jones Benjamin, Eleanor G Bentley, Anu Chawla, Jordan J Clark, Angela Cowell, Richard Eccles, Isabel Garcia-Donval, Matthew Gemmill, Alessandro Gerada, PFR Gilmore, Richard Gregory, Ximeng Han, Catherine Hartley, Margaret Hughes, Miran Ilturza-Gomara, James Johnson, L Liu, Jennifer Manson, Charlotte Nelson, Elaine O'Toole, Cassie Oriadeji, Rebekah Penrice-Handal, Lucile Rahnov, N P Randle, Trevor Ian Robinson, Parul Sharma, Ghada T Shawil, James P Stewart, Neil Swainson, Ecaterina Varnos, Joanne Waihs, Mark Whitehead |
| EPI_ISL_702528                                                                                 | Virology Department, Royal Infirmary of Edinburgh, NHS Lothian, School of Biological Sciences, University of Edinburgh / Institute of Genetics and Molecular Medicine, University of Edinburgh | COVID-19 Genomics UK (COG-UK) Consortium                                   | McHugh M, Dawar R, Roke S, Gallagher M, Balazs C, O'Toole A, Soper E, Hill V, McCrone JT, Colquhoun R, Yu X, Jackson B, Rambauf A, Williams TC, Templeton K                                                                                                                                                                                                                                                                                                                                                                                                                                                                                                                       |
| EPI_ISL_702529, EPI_ISL_702530, EPI_ISL_702538                                                 | Lighthouse Lab in Adeley Park                                                                                                                                                                  | Wellcome Sanger Institute for the COVID-19 Genomics UK (COG-UK) Consortium | Jacquelyn Wynn, Mairead Hyland, The Lighthouse Lab in Adeley Park and Alex Alderton, Roberto Anado, Sonia Goncalves, Ewan Harrison, David K. Jackson, Ian Johnston, Dominic Kwiatkowski, Cordelia Langford, John Sillito on behalf of the Wellcome Sanger Institute COVID-19 Surveillance Team                                                                                                                                                                                                                                                                                                                                                                                    |
| EPI_ISL_702539                                                                                 | Northumbria University / South Tees Hospitals NHS Foundation Trust / North Tees and Hartlepool NHS Foundation Trust / Newcastle Hospitals NHS Foundation Trust                                 | COVID-19 Genomics UK (COG-UK) Consortium                                   | Jacquelyn Wynn, Mairead Hyland, The Lighthouse Lab in Adeley Park and Alex Alderton, Roberto Anado, Sonia Goncalves, Ewan Harrison, David K. Jackson, Ian Johnston, Dominic Kwiatkowski, Cordelia Langford, John Sillito on behalf of the Wellcome Sanger Institute COVID-19 Surveillance Team                                                                                                                                                                                                                                                                                                                                                                                    |
| EPI_ISL_702540, EPI_ISL_702543, EPI_ISL_702546                                                 | Lighthouse Lab in Adeley Park                                                                                                                                                                  | Wellcome Sanger Institute for the COVID-19 Genomics UK (COG-UK) Consortium | Jacquelyn Wynn, Mairead Hyland, The Lighthouse Lab in Adeley Park and Alex Alderton, Roberto Anado, Sonia Goncalves, Ewan Harrison, David K. Jackson, Ian Johnston, Dominic Kwiatkowski, Cordelia Langford, John Sillito on behalf of the Wellcome Sanger Institute COVID-19 Surveillance Team                                                                                                                                                                                                                                                                                                                                                                                    |
| EPI_ISL_702547                                                                                 | Northumbria University / South Tees Hospitals NHS Foundation Trust / North Tees and Hartlepool NHS Foundation Trust / Newcastle Hospitals NHS Foundation Trust                                 | COVID-19 Genomics UK (COG-UK) Consortium                                   | Jacquelyn Wynn, Mairead Hyland, The Lighthouse Lab in Adeley Park and Alex Alderton, Roberto Anado, Sonia Goncalves, Ewan Harrison, David K. Jackson, Ian Johnston, Dominic Kwiatkowski, Cordelia Langford, John Sillito on behalf of the Wellcome Sanger Institute COVID-19 Surveillance Team                                                                                                                                                                                                                                                                                                                                                                                    |
| EPI_ISL_702553                                                                                 | Wales Specialist Virology Centre Sequencing lab, Pathogen Genomics Unit                                                                                                                        | COVID-19 Genomics UK (COG-UK) Consortium                                   | Catherine Moore, Johnathan Evans, Laura Gifford, Malorie Perry, Simon Cottrell, Angela Marchbank, Alec Bitchley, Alexander Adams, Amy Gaskin, Bree Galica-Wilcox, Jason Coombes, Joel Southgate, Lauren Gilbert, Lee Graham, Nicole Paschianri, Sara Kunzians-Summerhayes, Sarah Taylor, Sophie Jones, Sara Ray, Matthew Bull, Joanna Walkins, Sally Corden, Tom Connor                                                                                                                                                                                                                                                                                                           |
| EPI_ISL_702554                                                                                 | Lighthouse Lab in Adeley Park                                                                                                                                                                  | Wellcome Sanger Institute for the COVID-19 Genomics UK (COG-UK) Consortium | Jacquelyn Wynn, Mairead Hyland, The Lighthouse Lab in Adeley Park and Alex Alderton, Roberto Anado, Sonia Goncalves, Ewan Harrison, David K. Jackson, Ian Johnston, Dominic Kwiatkowski, Cordelia Langford, John Sillito on behalf of the Wellcome Sanger Institute COVID-19 Surveillance Team                                                                                                                                                                                                                                                                                                                                                                                    |
| EPI_ISL_702562                                                                                 | University of Exeter                                                                                                                                                                           | COVID-19 Genomics UK (COG-UK) Consortium                                   | Ban Temponor, Aaron Jeffries, Michelle Michelsen, Joanna Warwick-Dugdale, Audrey Farbos, Robyn Manley, Stephen Mitchell, Jane Masoli                                                                                                                                                                                                                                                                                                                                                                                                                                                                                                                                              |
| EPI_ISL_702565                                                                                 | Lighthouse Lab in Adeley Park                                                                                                                                                                  | Wellcome Sanger Institute for the COVID-19 Genomics UK (COG-UK) Consortium | Jacquelyn Wynn, Mairead Hyland, The Lighthouse Lab in Adeley Park and Alex Alderton, Roberto Anado, Sonia Goncalves, Ewan Harrison, David K. Jackson, Ian Johnston, Dominic Kwiatkowski, Cordelia Langford, John Sillito on behalf of the Wellcome Sanger Institute COVID-19 Surveillance Team                                                                                                                                                                                                                                                                                                                                                                                    |
| EPI_ISL_702566                                                                                 | Liverpool Clinical Laboratories                                                                                                                                                                | COVID-19 Genomics UK (COG-UK) Consortium                                   | Sam Hadenby, Anita Luczai, Steve Paterson, Julian Hiscox, Alistair Darty, M Amsaud, A Alvezahi, Muhammad Alruwail, Stuart D Armstrong, Jones Benjamin, Eleanor G Bentley, Anu Chawla, Jordan J Clark, Angela Cowell, Richard Eccles, Isabel Garcia-Donval, Matthew Gemmill, Alessandro Gerada, PFR Gilmore, Richard Gregory, Ximeng Han, Catherine Hartley, Margaret Hughes, Miran Ilturza-Gomara, James Johnson, L Liu, Jennifer Manson, Charlotte Nelson, Elaine O'Toole, Cassie Oriadeji, Rebekah Penrice-Handal, Lucile Rahnov, N P Randle, Trevor Ian Robinson, Parul Sharma, Ghada T Shawil, James P Stewart, Neil Swainson, Ecaterina Varnos, Joanne Waihs, Mark Whitehead |
| EPI_ISL_702567, EPI_ISL_702568, EPI_ISL_702570                                                 | Lighthouse Lab in Adeley Park                                                                                                                                                                  | Wellcome Sanger Institute for the COVID-19 Genomics UK (COG-UK) Consortium | Jacquelyn Wynn, Mairead Hyland, The Lighthouse Lab in Adeley Park and Alex Alderton, Roberto Anado, Sonia Goncalves, Ewan Harrison, David K. Jackson, Ian Johnston, Dominic Kwiatkowski, Cordelia Langford, John Sillito on behalf of the Wellcome Sanger Institute COVID-19 Surveillance Team                                                                                                                                                                                                                                                                                                                                                                                    |
| EPI_ISL_702574                                                                                 | Liverpool Clinical Laboratories                                                                                                                                                                | COVID-19 Genomics UK (COG-UK) Consortium                                   | Sam Hadenby, Anita Luczai, Steve Paterson, Julian Hiscox, Alistair Darty, M Amsaud, A Alvezahi, Muhammad Alruwail, Stuart D Armstrong, Jones Benjamin, Eleanor G Bentley, Anu Chawla, Jordan J Clark, Angela Cowell, Richard Eccles, Isabel Garcia-Donval, Matthew Gemmill, Alessandro Gerada, PFR Gilmore, Richard Gregory, Ximeng Han, Catherine Hartley, Margaret Hughes, Miran Ilturza-Gomara, James Johnson, L Liu, Jennifer Manson, Charlotte Nelson, Elaine O'Toole, Cassie Oriadeji, Rebekah Penrice-Handal, Lucile Rahnov, N P Randle, Trevor Ian Robinson, Parul Sharma, Ghada T Shawil, James P Stewart, Neil Swainson, Ecaterina Varnos, Joanne Waihs, Mark Whitehead |
| EPI_ISL_702578                                                                                 | Lighthouse Lab in Adeley Park                                                                                                                                                                  | Wellcome Sanger Institute for the COVID-19 Genomics UK (COG-UK) Consortium | Jacquelyn Wynn, Mairead Hyland, The Lighthouse Lab in Adeley Park and Alex Alderton, Roberto Anado, Sonia Goncalves, Ewan Harrison, David K. Jackson, Ian Johnston, Dominic Kwiatkowski, Cordelia Langford, John Sillito on behalf of the Wellcome Sanger Institute COVID-19 Surveillance Team                                                                                                                                                                                                                                                                                                                                                                                    |
| EPI_ISL_702579                                                                                 | Virology Department, Sheffield Teaching Hospitals NHS Foundation Trust, Department of Infection, Immunity and Cardiovascular Disease, The Medical School, University of Sheffield              | COVID-19 Genomics UK (COG-UK) Consortium                                   | Thushan de Silva, Matthew Parker, Nikki Smith, Aidi Argyal, Rebecca Brown, Luke Green, Rachel Tucker, Paul Parsons, Danielle Groves, Katie Johnson, Laura Carrillo, Alex Kealey, Dave Partridge, Matthew Wyles, Benjamin Lindsey, Mehmet Yavuz, Mohammad Raza, Carad Evans                                                                                                                                                                                                                                                                                                                                                                                                        |
| EPI_ISL_702580, EPI_ISL_702581                                                                 | Lighthouse Lab in Adeley Park                                                                                                                                                                  | Wellcome Sanger Institute for the COVID-19 Genomics UK (COG-UK) Consortium | Jacquelyn Wynn, Mairead Hyland, The Lighthouse Lab in Adeley Park and Alex Alderton, Roberto Anado, Sonia Goncalves, Ewan Harrison, David K. Jackson, Ian Johnston, Dominic Kwiatkowski, Cordelia Langford, John Sillito on behalf of the Wellcome Sanger Institute COVID-19 Surveillance Team                                                                                                                                                                                                                                                                                                                                                                                    |
| EPI_ISL_702582                                                                                 | Liverpool Clinical Laboratories                                                                                                                                                                | COVID-19 Genomics UK (COG-UK) Consortium                                   | Sam Hadenby, Anita Luczai, Steve Paterson, Julian Hiscox, Alistair Darty, M Amsaud, A Alvezahi, Muhammad Alruwail, Stuart D Armstrong, Jones Benjamin, Eleanor G Bentley, Anu Chawla, Jordan J Clark, Angela Cowell, Richard Eccles, Isabel Garcia-Donval, Matthew Gemmill, Alessandro Gerada, PFR Gilmore, Richard Gregory, Ximeng Han, Catherine Hartley, Margaret Hughes, Miran Ilturza-Gomara, James Johnson, L Liu, Jennifer Manson, Charlotte Nelson, Elaine O'Toole, Cassie Oriadeji, Rebekah Penrice-Handal, Lucile Rahnov, N P Randle, Trevor Ian Robinson, Parul Sharma, Ghada T Shawil, James P Stewart, Neil Swainson, Ecaterina Varnos, Joanne Waihs, Mark Whitehead |



|                                                                                                |                                                                                                                                                                                   |                                                                            |                                                                                                                                                                                                                                                                                                                                                                                                                                                                                                                                                                                                                                                                                      |
|------------------------------------------------------------------------------------------------|-----------------------------------------------------------------------------------------------------------------------------------------------------------------------------------|----------------------------------------------------------------------------|--------------------------------------------------------------------------------------------------------------------------------------------------------------------------------------------------------------------------------------------------------------------------------------------------------------------------------------------------------------------------------------------------------------------------------------------------------------------------------------------------------------------------------------------------------------------------------------------------------------------------------------------------------------------------------------|
| EP1_ISL_702585                                                                                 | Centre for Enzyme Innovation, University of Portsmouth / Translational Research Laboratory, Portsmouth Hospitals NHS Trust                                                        | COVID-19 Genomics UK (COG-UK) Consortium                                   | Sam Hadenby, Anita Luczad, Steve Paterson, Julian Hiscox, Alistair Darcy, M Almsaud, A Alvezahi, Muhammad Alruwaili, Stuart D Armstrong, Jones Benjamin, Eleanor G Bentley, Anu Chawla, Jordan J Clark, Angela Cowell, Richard Eccles, Isabel Garcia-Donval, Matthew Gemmill, Alessandro Gerada, PKF Gilmore, Richard Gregory, Ximeng Han, Catherine Hartley, Margaret Hughes, Miran Ijurza-Gomara, James Johnson, L Lluu, Jennifer Manson, Charlotte Nelson, Elaine O'Toole, Cassie Orlaqui, Rebekah Penrice-Flandri, Lucile Ranbow, N P Randle, Trevor Ian Robinson, Parul Sharma, Ghada T Shawil, James P Stewart, Neil Swainson, Ecaterina Varnos, Joanne Waiats, Mark Whithread |
| EP1_ISL_702587                                                                                 | Liverpool Clinical Laboratories                                                                                                                                                   | COVID-19 Genomics UK (COG-UK) Consortium                                   | Sam Hadenby, Anita Luczad, Steve Paterson, Julian Hiscox, Alistair Darcy, M Almsaud, A Alvezahi, Muhammad Alruwaili, Stuart D Armstrong, Jones Benjamin, Eleanor G Bentley, Anu Chawla, Jordan J Clark, Angela Cowell, Richard Eccles, Isabel Garcia-Donval, Matthew Gemmill, Alessandro Gerada, PKF Gilmore, Richard Gregory, Ximeng Han, Catherine Hartley, Margaret Hughes, Miran Ijurza-Gomara, James Johnson, L Lluu, Jennifer Manson, Charlotte Nelson, Elaine O'Toole, Cassie Orlaqui, Rebekah Penrice-Flandri, Lucile Ranbow, N P Randle, Trevor Ian Robinson, Parul Sharma, Ghada T Shawil, James P Stewart, Neil Swainson, Ecaterina Varnos, Joanne Waiats, Mark Whithread |
| EP1_ISL_702592, EP1_ISL_702593, EP1_ISL_702595, EP1_ISL_702596, EP1_ISL_702599                 | Lighthouse Lab in Alderley Park                                                                                                                                                   | Wellcome Sanger Institute for the COVID-19 Genomics UK (COG-UK) Consortium | Jacquelyn Wynn, Mairead Hyland, The Lighthouse Lab in Alderley Park and Alex Alderton, Roberto Amato, Sonia Goncalves, Ewan Harrison, David K Jackson, Ian Johnston, Dominic Kwiatkowski, Cordelia Langford, John Sillito on behalf of the Wellcome Sanger Institute COVID-19 Surveillance Team                                                                                                                                                                                                                                                                                                                                                                                      |
| EP1_ISL_702602                                                                                 | University College London Hospital                                                                                                                                                | COVID-19 Genomics UK (COG-UK) Consortium                                   | Judith Heaney, Matthew Byott, Catherine Hourigan, Dan Frampton, Stuart Kirk, Maria Szyer and Emani Nestouli                                                                                                                                                                                                                                                                                                                                                                                                                                                                                                                                                                          |
| EP1_ISL_702603                                                                                 | Lighthouse Lab in Alderley Park                                                                                                                                                   | Wellcome Sanger Institute for the COVID-19 Genomics UK (COG-UK) Consortium | Jacquelyn Wynn, Mairead Hyland, The Lighthouse Lab in Alderley Park and Alex Alderton, Roberto Amato, Sonia Goncalves, Ewan Harrison, David K Jackson, Ian Johnston, Dominic Kwiatkowski, Cordelia Langford, John Sillito on behalf of the Wellcome Sanger Institute COVID-19 Surveillance Team                                                                                                                                                                                                                                                                                                                                                                                      |
| EP1_ISL_702605                                                                                 | Liverpool Clinical Laboratories                                                                                                                                                   | COVID-19 Genomics UK (COG-UK) Consortium                                   | Sam Hadenby, Anita Luczad, Steve Paterson, Julian Hiscox, Alistair Darcy, M Almsaud, A Alvezahi, Muhammad Alruwaili, Stuart D Armstrong, Jones Benjamin, Eleanor G Bentley, Anu Chawla, Jordan J Clark, Angela Cowell, Richard Eccles, Isabel Garcia-Donval, Matthew Gemmill, Alessandro Gerada, PKF Gilmore, Richard Gregory, Ximeng Han, Catherine Hartley, Margaret Hughes, Miran Ijurza-Gomara, James Johnson, L Lluu, Jennifer Manson, Charlotte Nelson, Elaine O'Toole, Cassie Orlaqui, Rebekah Penrice-Flandri, Lucile Ranbow, N P Randle, Trevor Ian Robinson, Parul Sharma, Ghada T Shawil, James P Stewart, Neil Swainson, Ecaterina Varnos, Joanne Waiats, Mark Whithread |
| EP1_ISL_702607                                                                                 | Virology Department, Sheffield Teaching Hospitals NHS Foundation Trust,Department of Infection, Immunity, and Cardiovascular Disease, The Medical School, University of Sheffield | COVID-19 Genomics UK (COG-UK) Consortium                                   | Thushan de Silva, Matthew Parker, Nikki Smith, Adri Angyal, Rebecca Brown, Luke Green, Rachel Tucker, Paul Parsons, Danielle Groves, Katie Johnson, Laura Carrilero, Alex Keesley, Dave Partridge, Matthew Wyles, Benjamin Lindsey, Mehmet Yavuz, Mohammad Raza, Carlad Evans                                                                                                                                                                                                                                                                                                                                                                                                        |
| EP1_ISL_702608, EP1_ISL_702609, EP1_ISL_702614                                                 | Lighthouse Lab in Alderley Park                                                                                                                                                   | Wellcome Sanger Institute for the COVID-19 Genomics UK (COG-UK) Consortium | Jacquelyn Wynn, Mairead Hyland, The Lighthouse Lab in Alderley Park and Alex Alderton, Roberto Amato, Sonia Goncalves, Ewan Harrison, David K Jackson, Ian Johnston, Dominic Kwiatkowski, Cordelia Langford, John Sillito on behalf of the Wellcome Sanger Institute COVID-19 Surveillance Team                                                                                                                                                                                                                                                                                                                                                                                      |
| EP1_ISL_702615                                                                                 | Liverpool Clinical Laboratories                                                                                                                                                   | COVID-19 Genomics UK (COG-UK) Consortium                                   | Sam Hadenby, Anita Luczad, Steve Paterson, Julian Hiscox, Alistair Darcy, M Almsaud, A Alvezahi, Muhammad Alruwaili, Stuart D Armstrong, Jones Benjamin, Eleanor G Bentley, Anu Chawla, Jordan J Clark, Angela Cowell, Richard Eccles, Isabel Garcia-Donval, Matthew Gemmill, Alessandro Gerada, PKF Gilmore, Richard Gregory, Ximeng Han, Catherine Hartley, Margaret Hughes, Miran Ijurza-Gomara, James Johnson, L Lluu, Jennifer Manson, Charlotte Nelson, Elaine O'Toole, Cassie Orlaqui, Rebekah Penrice-Flandri, Lucile Ranbow, N P Randle, Trevor Ian Robinson, Parul Sharma, Ghada T Shawil, James P Stewart, Neil Swainson, Ecaterina Varnos, Joanne Waiats, Mark Whithread |
| EP1_ISL_702618                                                                                 | West of Scotland Specialist Virology Centre, NHSGCG / MRC-University of Glasgow Centre for Virus Research                                                                         | COVID-19 Genomics UK (COG-UK) Consortium                                   | Ana da Silva Filipe, Natasha Johnson, Kathy Smollett, Daniel Mair, Stephen Carmichael, Alice Boos, Lily Tong, Jenna Nichols, Kyriaki Nomioku, Sarah McDonald, Richard Orton, Joseph Higgins, Steenu Vaidipally, David L Robertson, Alexander Maclean, Rory Gunson, Sharif Shaaban, Matthew Holden, Rachel Biscox, Guy Mollett, Kathy U, James Shepherd, Antonia Ho, Emma Thomson                                                                                                                                                                                                                                                                                                     |
| EP1_ISL_702619                                                                                 | Lighthouse Lab in Alderley Park                                                                                                                                                   | Wellcome Sanger Institute for the COVID-19 Genomics UK (COG-UK) Consortium | Jacquelyn Wynn, Mairead Hyland, The Lighthouse Lab in Alderley Park and Alex Alderton, Roberto Amato, Sonia Goncalves, Ewan Harrison, David K Jackson, Ian Johnston, Dominic Kwiatkowski, Cordelia Langford, John Sillito on behalf of the Wellcome Sanger Institute COVID-19 Surveillance Team                                                                                                                                                                                                                                                                                                                                                                                      |
| EP1_ISL_702623                                                                                 | Liverpool Clinical Laboratories                                                                                                                                                   | COVID-19 Genomics UK (COG-UK) Consortium                                   | Sam Hadenby, Anita Luczad, Steve Paterson, Julian Hiscox, Alistair Darcy, M Almsaud, A Alvezahi, Muhammad Alruwaili, Stuart D Armstrong, Jones Benjamin, Eleanor G Bentley, Anu Chawla, Jordan J Clark, Angela Cowell, Richard Eccles, Isabel Garcia-Donval, Matthew Gemmill, Alessandro Gerada, PKF Gilmore, Richard Gregory, Ximeng Han, Catherine Hartley, Margaret Hughes, Miran Ijurza-Gomara, James Johnson, L Lluu, Jennifer Manson, Charlotte Nelson, Elaine O'Toole, Cassie Orlaqui, Rebekah Penrice-Flandri, Lucile Ranbow, N P Randle, Trevor Ian Robinson, Parul Sharma, Ghada T Shawil, James P Stewart, Neil Swainson, Ecaterina Varnos, Joanne Waiats, Mark Whithread |
| EP1_ISL_702627, EP1_ISL_702630, EP1_ISL_702632, EP1_ISL_702634, EP1_ISL_702638                 | Lighthouse Lab in Alderley Park                                                                                                                                                   | Wellcome Sanger Institute for the COVID-19 Genomics UK (COG-UK) Consortium | Jacquelyn Wynn, Mairead Hyland, The Lighthouse Lab in Alderley Park and Alex Alderton, Roberto Amato, Sonia Goncalves, Ewan Harrison, David K Jackson, Ian Johnston, Dominic Kwiatkowski, Cordelia Langford, John Sillito on behalf of the Wellcome Sanger Institute COVID-19 Surveillance Team                                                                                                                                                                                                                                                                                                                                                                                      |
| EP1_ISL_702649                                                                                 | Liverpool Clinical Laboratories                                                                                                                                                   | COVID-19 Genomics UK (COG-UK) Consortium                                   | Sam Hadenby, Anita Luczad, Steve Paterson, Julian Hiscox, Alistair Darcy, M Almsaud, A Alvezahi, Muhammad Alruwaili, Stuart D Armstrong, Jones Benjamin, Eleanor G Bentley, Anu Chawla, Jordan J Clark, Angela Cowell, Richard Eccles, Isabel Garcia-Donval, Matthew Gemmill, Alessandro Gerada, PKF Gilmore, Richard Gregory, Ximeng Han, Catherine Hartley, Margaret Hughes, Miran Ijurza-Gomara, James Johnson, L Lluu, Jennifer Manson, Charlotte Nelson, Elaine O'Toole, Cassie Orlaqui, Rebekah Penrice-Flandri, Lucile Ranbow, N P Randle, Trevor Ian Robinson, Parul Sharma, Ghada T Shawil, James P Stewart, Neil Swainson, Ecaterina Varnos, Joanne Waiats, Mark Whithread |
| EP1_ISL_702651                                                                                 | Lighthouse Lab in Alderley Park                                                                                                                                                   | Wellcome Sanger Institute for the COVID-19 Genomics UK (COG-UK) Consortium | Jacquelyn Wynn, Mairead Hyland, The Lighthouse Lab in Alderley Park and Alex Alderton, Roberto Amato, Sonia Goncalves, Ewan Harrison, David K Jackson, Ian Johnston, Dominic Kwiatkowski, Cordelia Langford, John Sillito on behalf of the Wellcome Sanger Institute COVID-19 Surveillance Team                                                                                                                                                                                                                                                                                                                                                                                      |
| EP1_ISL_702652                                                                                 | Quadram Institute Bioscience                                                                                                                                                      | COVID-19 Genomics UK (COG-UK) Consortium                                   | Dave J Baker, Gemma L Kay, Alp Aydin, Thanh Le-Viet, Steven Rudder, Ana P Tedin, Anastasia Kolyva, Maria Diaz, Leonardo de Oliveira Martins, Nabil-Fareed Alkhran, Lezli Meadows, Rachael Stanley, Nguzi Eunogo, Muhammad Yasir, Nicholas M Thomson, Alexander J Trotter, Rachel Gilroy, Samuel Bloomfield, Claire Stuart, Andrew Bell, Heenesh Prakash, Samir Dervisevic, Alison E Walker, John Watt, Mark Webber, Andrew J Page, Justin O'Grady                                                                                                                                                                                                                                    |
| EP1_ISL_702660, EP1_ISL_702662, EP1_ISL_702663, EP1_ISL_702665, EP1_ISL_702666, EP1_ISL_702671 | Lighthouse Lab in Alderley Park                                                                                                                                                   | Wellcome Sanger Institute for the COVID-19 Genomics UK (COG-UK) Consortium | Jacquelyn Wynn, Mairead Hyland, The Lighthouse Lab in Alderley Park and Alex Alderton, Roberto Amato, Sonia Goncalves, Ewan Harrison, David K Jackson, Ian Johnston, Dominic Kwiatkowski, Cordelia Langford, John Sillito on behalf of the Wellcome Sanger Institute COVID-19 Surveillance Team                                                                                                                                                                                                                                                                                                                                                                                      |
| EP1_ISL_702672, EP1_ISL_702674                                                                 | Liverpool Clinical Laboratories                                                                                                                                                   | COVID-19 Genomics UK (COG-UK) Consortium                                   | Sam Hadenby, Anita Luczad, Steve Paterson, Julian Hiscox, Alistair Darcy, M Almsaud, A Alvezahi, Muhammad Alruwaili, Stuart D Armstrong, Jones Benjamin, Eleanor G Bentley, Anu Chawla, Jordan J Clark, Angela Cowell, Richard Eccles, Isabel Garcia-Donval, Matthew Gemmill, Alessandro Gerada, PKF Gilmore, Richard Gregory, Ximeng Han, Catherine Hartley, Margaret Hughes, Miran Ijurza-Gomara, James Johnson, L Lluu, Jennifer Manson, Charlotte Nelson, Elaine O'Toole, Cassie Orlaqui, Rebekah Penrice-Flandri, Lucile Ranbow, N P Randle, Trevor Ian Robinson, Parul Sharma, Ghada T Shawil, James P Stewart, Neil Swainson, Ecaterina Varnos, Joanne Waiats, Mark Whithread |
| EP1_ISL_702675                                                                                 | Lighthouse Lab in Alderley Park                                                                                                                                                   | Wellcome Sanger Institute for the COVID-19 Genomics UK (COG-UK) Consortium | Jacquelyn Wynn, Mairead Hyland, The Lighthouse Lab in Alderley Park and Alex Alderton, Roberto Amato, Sonia Goncalves, Ewan Harrison, David K Jackson, Ian Johnston, Dominic Kwiatkowski, Cordelia Langford, John Sillito on behalf of the Wellcome Sanger Institute COVID-19 Surveillance Team                                                                                                                                                                                                                                                                                                                                                                                      |
| EP1_ISL_702677                                                                                 | Liverpool Clinical Laboratories                                                                                                                                                   | COVID-19 Genomics UK (COG-UK) Consortium                                   | Sam Hadenby, Anita Luczad, Steve Paterson, Julian Hiscox, Alistair Darcy, M Almsaud, A Alvezahi, Muhammad Alruwaili, Stuart D Armstrong, Jones Benjamin, Eleanor G Bentley, Anu Chawla, Jordan J Clark, Angela Cowell, Richard Eccles, Isabel Garcia-Donval, Matthew Gemmill, Alessandro Gerada, PKF Gilmore, Richard Gregory, Ximeng Han, Catherine Hartley, Margaret Hughes, Miran Ijurza-Gomara, James Johnson, L Lluu, Jennifer Manson, Charlotte Nelson, Elaine O'Toole, Cassie Orlaqui, Rebekah Penrice-Flandri, Lucile Ranbow, N P Randle, Trevor Ian Robinson, Parul Sharma, Ghada T Shawil, James P Stewart, Neil Swainson, Ecaterina Varnos, Joanne Waiats, Mark Whithread |
| EP1_ISL_702678, EP1_ISL_702680                                                                 | Lighthouse Lab in Alderley Park                                                                                                                                                   | Wellcome Sanger Institute for the COVID-19 Genomics UK (COG-UK) Consortium | Jacquelyn Wynn, Mairead Hyland, The Lighthouse Lab in Alderley Park and Alex Alderton, Roberto Amato, Sonia Goncalves, Ewan Harrison, David K Jackson, Ian Johnston, Dominic Kwiatkowski, Cordelia Langford, John Sillito on behalf of the Wellcome Sanger Institute COVID-19 Surveillance Team                                                                                                                                                                                                                                                                                                                                                                                      |
| EP1_ISL_702682                                                                                 | Virology Department, Sheffield Teaching Hospitals NHS Foundation Trust,Department of Infection, Immunity, and                                                                     | COVID-19 Genomics UK (COG-UK) Consortium                                   | Thushan de Silva, Matthew Parker, Nikki Smith, Adri Angyal, Rebecca Brown, Luke Green, Rachel Tucker, Paul Parsons, Danielle Groves, Katie Johnson, Laura Carrilero, Alex Keesley, Dave Partridge, Matthew Wyles, Benjamin Lindsey, Mehmet Yavuz, Mohammad Raza, Carlad Evans                                                                                                                                                                                                                                                                                                                                                                                                        |

|                                                                                                                                |                                                                                                                                                                                                                     |                                                                            |                                                                                                                                                                                                                                                                                                                                                                                                                                                                                                                                                                                                                                                                                       |  |  |
|--------------------------------------------------------------------------------------------------------------------------------|---------------------------------------------------------------------------------------------------------------------------------------------------------------------------------------------------------------------|----------------------------------------------------------------------------|---------------------------------------------------------------------------------------------------------------------------------------------------------------------------------------------------------------------------------------------------------------------------------------------------------------------------------------------------------------------------------------------------------------------------------------------------------------------------------------------------------------------------------------------------------------------------------------------------------------------------------------------------------------------------------------|--|--|
|                                                                                                                                | Cardiovascular Disease, The Medical School, University of Sheffield                                                                                                                                                 |                                                                            |                                                                                                                                                                                                                                                                                                                                                                                                                                                                                                                                                                                                                                                                                       |  |  |
| EPI_ISL_702693                                                                                                                 | Lighthouse Lab in Alderley Park                                                                                                                                                                                     | Wellcome Sanger Institute for the COVID-19 Genomics UK (COG-UK) Consortium | Jacquelyn Wynn, Mairead Hyland, The Lighthouse Lab in Alderley Park and Alex Alderton, Roberto Anado, Sonia Goncalves, Ewan Harrison, David K. Jackson, Ian Johnston, Dominic Kwiatkowski, Cordelia Langford, John Sillito on behalf of the Wellcome Sanger Institute COVID-19 Surveillance Team                                                                                                                                                                                                                                                                                                                                                                                      |  |  |
| EPI_ISL_702694                                                                                                                 | Liverpool Clinical Laboratories                                                                                                                                                                                     | COVID-19 Genomics UK (COG-UK) Consortium                                   | Sam Hadenby, Anita Lucaci, Steve Paterson, Julian Hiscox, Alistair Darty, M Aimsaud, A Alvezahli, Muhammad Alruwaili, Stuart D Armstrong, Jones Benjamin, Eleanor G Bentley, Anu Charwia, Jordan J Clark, Angela Cowell, Richard Eccles, Isabel Garcia-Dornal, Matthew Gemmill, Alessandro Gerada, PKF Gilmore, Richard Gregory, Ximeng Han, Catherine Hartley, Margaret Hughes, Miran Iuriza-Gomara, James Johnson, L Liu, Jennifer Manson, Charlotte Nelson, Elaine O'Toole, Casise Orladiu, Rebekah Penrice-Handal, Lucille Rahnov, N P Randle, Trevor Ian Robinson, Parul Sharma, Ghada T Shawli, James P Stewart, Neil Swainston, Ecaterina Varnos, Joanne Waihs, Mark Whitehead |  |  |
| EPI_ISL_702696, EPI_ISL_702698, EPI_ISL_702699                                                                                 | Lighthouse Lab in Alderley Park                                                                                                                                                                                     | Wellcome Sanger Institute for the COVID-19 Genomics UK (COG-UK) Consortium | Jacquelyn Wynn, Mairead Hyland, The Lighthouse Lab in Alderley Park and Alex Alderton, Roberto Anado, Sonia Goncalves, Ewan Harrison, David K. Jackson, Ian Johnston, Dominic Kwiatkowski, Cordelia Langford, John Sillito on behalf of the Wellcome Sanger Institute COVID-19 Surveillance Team                                                                                                                                                                                                                                                                                                                                                                                      |  |  |
| EPI_ISL_702700                                                                                                                 | Quadrant Institute Bioscience                                                                                                                                                                                       | COVID-19 Genomics UK (COG-UK) Consortium                                   | Sam Hadenby, Anita Lucaci, Steve Paterson, Julian Hiscox, Alistair Darty, M Aimsaud, A Alvezahli, Muhammad Alruwaili, Stuart D Armstrong, Jones Benjamin, Eleanor G Bentley, Anu Charwia, Jordan J Clark, Angela Cowell, Richard Eccles, Isabel Garcia-Dornal, Matthew Gemmill, Alessandro Gerada, PKF Gilmore, Richard Gregory, Ximeng Han, Catherine Hartley, Margaret Hughes, Miran Iuriza-Gomara, James Johnson, L Liu, Jennifer Manson, Charlotte Nelson, Elaine O'Toole, Casise Orladiu, Rebekah Penrice-Handal, Lucille Rahnov, N P Randle, Trevor Ian Robinson, Parul Sharma, Ghada T Shawli, James P Stewart, Neil Swainston, Ecaterina Varnos, Joanne Waihs, Mark Whitehead |  |  |
| EPI_ISL_702705                                                                                                                 | Virology Department, Sheffield Teaching Hospitals NHS Foundation Trust/Department of Infection, Immunity and Cardiovascular Disease, The Medical School, University of Sheffield                                    | COVID-19 Genomics UK (COG-UK) Consortium                                   | Thushan de Silva, Matthew Parker, Nikki Smith, Adri Angyal, Rebecca Brown, Luke Green, Rachel Tucker, Paul Parsons, Danielle Groves, Katie Johnson, Laura Carrilero, Alex Keesley, Dave Partridge, Matthew Wyles, Benjamin Lindsey, Mehmet Yavuz, Mohammad Raza, Carad Evans                                                                                                                                                                                                                                                                                                                                                                                                          |  |  |
| EPI_ISL_702710                                                                                                                 | Liverpool Clinical Laboratories                                                                                                                                                                                     | COVID-19 Genomics UK (COG-UK) Consortium                                   | Sam Hadenby, Anita Lucaci, Steve Paterson, Julian Hiscox, Alistair Darty, M Aimsaud, A Alvezahli, Muhammad Alruwaili, Stuart D Armstrong, Jones Benjamin, Eleanor G Bentley, Anu Charwia, Jordan J Clark, Angela Cowell, Richard Eccles, Isabel Garcia-Dornal, Matthew Gemmill, Alessandro Gerada, PKF Gilmore, Richard Gregory, Ximeng Han, Catherine Hartley, Margaret Hughes, Miran Iuriza-Gomara, James Johnson, L Liu, Jennifer Manson, Charlotte Nelson, Elaine O'Toole, Casise Orladiu, Rebekah Penrice-Handal, Lucille Rahnov, N P Randle, Trevor Ian Robinson, Parul Sharma, Ghada T Shawli, James P Stewart, Neil Swainston, Ecaterina Varnos, Joanne Waihs, Mark Whitehead |  |  |
| EPI_ISL_702715, EPI_ISL_702717                                                                                                 | Lighthouse Lab in Alderley Park                                                                                                                                                                                     | Wellcome Sanger Institute for the COVID-19 Genomics UK (COG-UK) Consortium | Jacquelyn Wynn, Mairead Hyland, The Lighthouse Lab in Alderley Park and Alex Alderton, Roberto Anado, Sonia Goncalves, Ewan Harrison, David K. Jackson, Ian Johnston, Dominic Kwiatkowski, Cordelia Langford, John Sillito on behalf of the Wellcome Sanger Institute COVID-19 Surveillance Team                                                                                                                                                                                                                                                                                                                                                                                      |  |  |
| EPI_ISL_702718                                                                                                                 | Liverpool Clinical Laboratories                                                                                                                                                                                     | COVID-19 Genomics UK (COG-UK) Consortium                                   | Sam Hadenby, Anita Lucaci, Steve Paterson, Julian Hiscox, Alistair Darty, M Aimsaud, A Alvezahli, Muhammad Alruwaili, Stuart D Armstrong, Jones Benjamin, Eleanor G Bentley, Anu Charwia, Jordan J Clark, Angela Cowell, Richard Eccles, Isabel Garcia-Dornal, Matthew Gemmill, Alessandro Gerada, PKF Gilmore, Richard Gregory, Ximeng Han, Catherine Hartley, Margaret Hughes, Miran Iuriza-Gomara, James Johnson, L Liu, Jennifer Manson, Charlotte Nelson, Elaine O'Toole, Casise Orladiu, Rebekah Penrice-Handal, Lucille Rahnov, N P Randle, Trevor Ian Robinson, Parul Sharma, Ghada T Shawli, James P Stewart, Neil Swainston, Ecaterina Varnos, Joanne Waihs, Mark Whitehead |  |  |
| EPI_ISL_702722, EPI_ISL_702725                                                                                                 | Lighthouse Lab in Alderley Park                                                                                                                                                                                     | Wellcome Sanger Institute for the COVID-19 Genomics UK (COG-UK) Consortium | Jacquelyn Wynn, Mairead Hyland, The Lighthouse Lab in Alderley Park and Alex Alderton, Roberto Anado, Sonia Goncalves, Ewan Harrison, David K. Jackson, Ian Johnston, Dominic Kwiatkowski, Cordelia Langford, John Sillito on behalf of the Wellcome Sanger Institute COVID-19 Surveillance Team                                                                                                                                                                                                                                                                                                                                                                                      |  |  |
| EPI_ISL_702729                                                                                                                 | Liverpool Clinical Laboratories                                                                                                                                                                                     | COVID-19 Genomics UK (COG-UK) Consortium                                   | Sam Hadenby, Anita Lucaci, Steve Paterson, Julian Hiscox, Alistair Darty, M Aimsaud, A Alvezahli, Muhammad Alruwaili, Stuart D Armstrong, Jones Benjamin, Eleanor G Bentley, Anu Charwia, Jordan J Clark, Angela Cowell, Richard Eccles, Isabel Garcia-Dornal, Matthew Gemmill, Alessandro Gerada, PKF Gilmore, Richard Gregory, Ximeng Han, Catherine Hartley, Margaret Hughes, Miran Iuriza-Gomara, James Johnson, L Liu, Jennifer Manson, Charlotte Nelson, Elaine O'Toole, Casise Orladiu, Rebekah Penrice-Handal, Lucille Rahnov, N P Randle, Trevor Ian Robinson, Parul Sharma, Ghada T Shawli, James P Stewart, Neil Swainston, Ecaterina Varnos, Joanne Waihs, Mark Whitehead |  |  |
| EPI_ISL_702740, EPI_ISL_702743, EPI_ISL_702748, EPI_ISL_702757, EPI_ISL_702764, EPI_ISL_702765, EPI_ISL_702767, EPI_ISL_702768 | Lighthouse Lab in Alderley Park                                                                                                                                                                                     | Wellcome Sanger Institute for the COVID-19 Genomics UK (COG-UK) Consortium | Jacquelyn Wynn, Mairead Hyland, The Lighthouse Lab in Alderley Park and Alex Alderton, Roberto Anado, Sonia Goncalves, Ewan Harrison, David K. Jackson, Ian Johnston, Dominic Kwiatkowski, Cordelia Langford, John Sillito on behalf of the Wellcome Sanger Institute COVID-19 Surveillance Team                                                                                                                                                                                                                                                                                                                                                                                      |  |  |
| EPI_ISL_702769                                                                                                                 | Liverpool Clinical Laboratories                                                                                                                                                                                     | COVID-19 Genomics UK (COG-UK) Consortium                                   | Sam Hadenby, Anita Lucaci, Steve Paterson, Julian Hiscox, Alistair Darty, M Aimsaud, A Alvezahli, Muhammad Alruwaili, Stuart D Armstrong, Jones Benjamin, Eleanor G Bentley, Anu Charwia, Jordan J Clark, Angela Cowell, Richard Eccles, Isabel Garcia-Dornal, Matthew Gemmill, Alessandro Gerada, PKF Gilmore, Richard Gregory, Ximeng Han, Catherine Hartley, Margaret Hughes, Miran Iuriza-Gomara, James Johnson, L Liu, Jennifer Manson, Charlotte Nelson, Elaine O'Toole, Casise Orladiu, Rebekah Penrice-Handal, Lucille Rahnov, N P Randle, Trevor Ian Robinson, Parul Sharma, Ghada T Shawli, James P Stewart, Neil Swainston, Ecaterina Varnos, Joanne Waihs, Mark Whitehead |  |  |
| EPI_ISL_702771                                                                                                                 | West of Scotland Specialist Virology Centre, NHSGCG / MRC-University of Glasgow Centre for Virus Research                                                                                                           | COVID-19 Genomics UK (COG-UK) Consortium                                   | Ana de Silva Filipe, Natasha Johnson, Kathy Snoddy, Daniel Meir, Stephen Carmichael, Alice Boos, Lily Tong, Janna Nichols, Kyriaki Nomiou, Sarah McQuinn, Richard Oron, Joseph Hughes, Steven Vattipalli, David L Robertson, Alexander MacLean, Rory Gurnon, Shariq Shaaban, Matthew Holden, Rachel Blacow, Guy Molteni, Kathy L, James Shepherd, Antonia Ho, Emma Thomson                                                                                                                                                                                                                                                                                                            |  |  |
| EPI_ISL_702776                                                                                                                 | Virology Department, Sheffield Teaching Hospitals NHS Foundation Trust/Department of Infection, Immunity and Cardiovascular Disease, The Medical School, University of Sheffield                                    | COVID-19 Genomics UK (COG-UK) Consortium                                   | Thushan de Silva, Matthew Parker, Nikki Smith, Adri Angyal, Rebecca Brown, Luke Green, Rachel Tucker, Paul Parsons, Danielle Groves, Katie Johnson, Laura Carrilero, Alex Keesley, Dave Partridge, Matthew Wyles, Benjamin Lindsey, Mehmet Yavuz, Mohammad Raza, Carad Evans                                                                                                                                                                                                                                                                                                                                                                                                          |  |  |
| EPI_ISL_702778, EPI_ISL_702781, EPI_ISL_702783                                                                                 | Lighthouse Lab in Alderley Park                                                                                                                                                                                     | Wellcome Sanger Institute for the COVID-19 Genomics UK (COG-UK) Consortium | Jacquelyn Wynn, Mairead Hyland, The Lighthouse Lab in Alderley Park and Alex Alderton, Roberto Anado, Sonia Goncalves, Ewan Harrison, David K. Jackson, Ian Johnston, Dominic Kwiatkowski, Cordelia Langford, John Sillito on behalf of the Wellcome Sanger Institute COVID-19 Surveillance Team                                                                                                                                                                                                                                                                                                                                                                                      |  |  |
| EPI_ISL_702784                                                                                                                 | Northumbria University / South Tees Hospitals NHS Foundation Trust / North Cumbria Integrated Care NHS Foundation Trust / North Tees and Hartlepool NHS Foundation Trust / Newcastle Hospitals NHS Foundation Trust | COVID-19 Genomics UK (COG-UK) Consortium                                   | Sam Hadenby, Anita Lucaci, Steve Paterson, Julian Hiscox, Alistair Darty, M Aimsaud, A Alvezahli, Muhammad Alruwaili, Stuart D Armstrong, Jones Benjamin, Eleanor G Bentley, Anu Charwia, Jordan J Clark, Angela Cowell, Richard Eccles, Isabel Garcia-Dornal, Matthew Gemmill, Alessandro Gerada, PKF Gilmore, Richard Gregory, Ximeng Han, Catherine Hartley, Margaret Hughes, Miran Iuriza-Gomara, James Johnson, L Liu, Jennifer Manson, Charlotte Nelson, Elaine O'Toole, Casise Orladiu, Rebekah Penrice-Handal, Lucille Rahnov, N P Randle, Trevor Ian Robinson, Parul Sharma, Ghada T Shawli, James P Stewart, Neil Swainston, Ecaterina Varnos, Joanne Waihs, Mark Whitehead |  |  |
| EPI_ISL_702787                                                                                                                 | Department of Pathology, University of Cambridge                                                                                                                                                                    | COVID-19 Genomics UK (COG-UK) Consortium                                   | Thushan de Silva, Matthew Parker, Nikki Smith, Adri Angyal, Rebecca Brown, Luke Green, Rachel Tucker, Paul Parsons, Danielle Groves, Katie Johnson, Laura Carrilero, Alex Keesley, Dave Partridge, Matthew Wyles, Benjamin Lindsey, Mehmet Yavuz, Mohammad Raza, Carad Evans                                                                                                                                                                                                                                                                                                                                                                                                          |  |  |
| EPI_ISL_702792                                                                                                                 | Liverpool Clinical Laboratories                                                                                                                                                                                     | COVID-19 Genomics UK (COG-UK) Consortium                                   | Sam Hadenby, Anita Lucaci, Steve Paterson, Julian Hiscox, Alistair Darty, M Aimsaud, A Alvezahli, Muhammad Alruwaili, Stuart D Armstrong, Jones Benjamin, Eleanor G Bentley, Anu Charwia, Jordan J Clark, Angela Cowell, Richard Eccles, Isabel Garcia-Dornal, Matthew Gemmill, Alessandro Gerada, PKF Gilmore, Richard Gregory, Ximeng Han, Catherine Hartley, Margaret Hughes, Miran Iuriza-Gomara, James Johnson, L Liu, Jennifer Manson, Charlotte Nelson, Elaine O'Toole, Casise Orladiu, Rebekah Penrice-Handal, Lucille Rahnov, N P Randle, Trevor Ian Robinson, Parul Sharma, Ghada T Shawli, James P Stewart, Neil Swainston, Ecaterina Varnos, Joanne Waihs, Mark Whitehead |  |  |
| EPI_ISL_702798                                                                                                                 | Virology Department, Sheffield Teaching Hospitals NHS Foundation Trust/Department of Infection, Immunity and Cardiovascular Disease, The Medical School, University of Sheffield                                    | COVID-19 Genomics UK (COG-UK) Consortium                                   | Thushan de Silva, Matthew Parker, Nikki Smith, Adri Angyal, Rebecca Brown, Luke Green, Rachel Tucker, Paul Parsons, Danielle Groves, Katie Johnson, Laura Carrilero, Alex Keesley, Dave Partridge, Matthew Wyles, Benjamin Lindsey, Mehmet Yavuz, Mohammad Raza, Carad Evans                                                                                                                                                                                                                                                                                                                                                                                                          |  |  |
| EPI_ISL_702799, EPI_ISL_702800                                                                                                 | Lighthouse Lab in Alderley Park                                                                                                                                                                                     | Wellcome Sanger Institute for the COVID-19 Genomics UK (COG-UK) Consortium | Jacquelyn Wynn, Mairead Hyland, The Lighthouse Lab in Alderley Park and Alex Alderton, Roberto Anado, Sonia Goncalves, Ewan Harrison, David K. Jackson, Ian Johnston, Dominic Kwiatkowski, Cordelia Langford, John Sillito on behalf of the Wellcome Sanger Institute COVID-19 Surveillance Team                                                                                                                                                                                                                                                                                                                                                                                      |  |  |

|                                             |  |  |  |  |  |  |  |                                                                                                                                                                                                                                                                                                                                                                                                                                                                                                                                                                                                                                                                                    |
|---------------------------------------------|--|--|--|--|--|--|--|------------------------------------------------------------------------------------------------------------------------------------------------------------------------------------------------------------------------------------------------------------------------------------------------------------------------------------------------------------------------------------------------------------------------------------------------------------------------------------------------------------------------------------------------------------------------------------------------------------------------------------------------------------------------------------|
| EP1_SL_702802                               |  |  |  |  |  |  |  | Jackson, Ian Johnston, Dominic Kwiatkowski, Cordelia Langford, John Sillcoe on behalf of the Wellcome Sanger Institute COVID-19 Surveillance Team                                                                                                                                                                                                                                                                                                                                                                                                                                                                                                                                  |
| EP1_SL_702803                               |  |  |  |  |  |  |  | Darren L Smith, Andrew Nelson, Matthew Bashton, Greg R Young, Joshua Loh, John Allen, Mohammad A Tariq, Giles S Holt, Gary Black, Wen C Yew, Lynn Dover, Paul Baker, Steve Liggitt, Sarah Essex, Jane Greenaway, Debra Padgett, Clive Graham, Darren Scott, Edward Barton, Emma Swindells, Brendan Payne, Jennifer Collins, Yusra Taha, Gary Ellingham                                                                                                                                                                                                                                                                                                                             |
| EP1_SL_702806                               |  |  |  |  |  |  |  |                                                                                                                                                                                                                                                                                                                                                                                                                                                                                                                                                                                                                                                                                    |
| EP1_SL_702808                               |  |  |  |  |  |  |  | Sam Haddenby, Anita Luczai, Steve Paterson, Julian Hiscox, Alistair Darcy, M Almsaud, A Alvezzali, Muhammad Atirwaili, Stuart D Armstrong, Jones Benjamin, Eleanor G Bentley, Anu Charwa, Jordan J Clark, Angela Cawell, Richard Eccles, Isabel Garcia-Dornal, Matthew Gemmill, Alessandro Gerada, PKF Gilmore, Richard Gregory, Ximeng Han, Catherine Hartley, Margaret Hughes, Miran Iltunza-Gomara, James Johnson, L Lluu, Jennifer Manson, Charlotte Nelson, Elaine O'Toole, Cassie Orlady, Rebekah Penrice-Handel, Lucile Rambow, N P Randie, Trevor Ian Robinson, Parul Sharma, Ghada T Shawli, James P Stewart, Neil Swainson, Eaterina Varnos, Joanne Wats, Mark Whitehead |
| EP1_SL_702809                               |  |  |  |  |  |  |  |                                                                                                                                                                                                                                                                                                                                                                                                                                                                                                                                                                                                                                                                                    |
| EP1_SL_702810, EP1_SL_702814                |  |  |  |  |  |  |  | Jacquelyn Wynn, Mairead Hyland, The Lighthouse Lab in Aderley Park and Alex Alderton, Roberto Anato, Sonia Goncalves, Ewan Harrison, David K Jackson, Ian Johnston, Dominic Kwiatkowski, Cordelia Langford, John Sillcoe on behalf of the Wellcome Sanger Institute COVID-19 Surveillance Team                                                                                                                                                                                                                                                                                                                                                                                     |
| EP1_SL_702815                               |  |  |  |  |  |  |  | Darren L Smith, Andrew Nelson, Matthew Bashton, Greg R Young, Joshua Loh, John Allen, Mohammad A Tariq, Giles S Holt, Gary Black, Wen C Yew, Lynn Dover, Paul Baker, Steve Liggitt, Sarah Essex, Jane Greenaway, Debra Padgett, Clive Graham, Darren Scott, Edward Barton, Emma Swindells, Brendan Payne, Jennifer Collins, Yusra Taha, Gary Ellingham                                                                                                                                                                                                                                                                                                                             |
| EP1_SL_702818, EP1_SL_702819                |  |  |  |  |  |  |  | Jacquelyn Wynn, Mairead Hyland, The Lighthouse Lab in Aderley Park and Alex Alderton, Roberto Anato, Sonia Goncalves, Ewan Harrison, David K Jackson, Ian Johnston, Dominic Kwiatkowski, Cordelia Langford, John Sillcoe on behalf of the Wellcome Sanger Institute COVID-19 Surveillance Team                                                                                                                                                                                                                                                                                                                                                                                     |
| EP1_SL_702823                               |  |  |  |  |  |  |  | Darren L Smith, Andrew Nelson, Matthew Bashton, Greg R Young, Joshua Loh, John Allen, Mohammad A Tariq, Giles S Holt, Gary Black, Wen C Yew, Lynn Dover, Paul Baker, Steve Liggitt, Sarah Essex, Jane Greenaway, Debra Padgett, Clive Graham, Darren Scott, Edward Barton, Emma Swindells, Brendan Payne, Jennifer Collins, Yusra Taha, Gary Ellingham                                                                                                                                                                                                                                                                                                                             |
| EP1_SL_702825                               |  |  |  |  |  |  |  | Dave J Baker, Gemma L Kay, Alp Aydin, Thanh Le-Viet, Steven Rudder, Ana P. Tedim, Anastasia Kolyva, Maria Diaz, Leonardo de Oliveira Martins, Nabil-Fareed Alhitan, Lizze Meadows, Rachael Stanley, Ngozi Elnunogo, Muhammad Yasar, Nicholas M. Thompson, Alexander J Trotter, Rachael Gilroy, Samuel Bloomfield, Claire Stuart, Andrew Bell, Reenesh Prakash, Sami Dervisevic, Alison E. Mathur, John Wain, Mark Webber, Andrew J. Page, Justin O'Grady                                                                                                                                                                                                                           |
| EP1_SL_702826                               |  |  |  |  |  |  |  |                                                                                                                                                                                                                                                                                                                                                                                                                                                                                                                                                                                                                                                                                    |
| EP1_SL_702835                               |  |  |  |  |  |  |  | Sam Haddenby, Anita Luczai, Steve Paterson, Julian Hiscox, Alistair Darcy, M Almsaud, A Alvezzali, Muhammad Atirwaili, Stuart D Armstrong, Jones Benjamin, Eleanor G Bentley, Anu Charwa, Jordan J Clark, Angela Cawell, Richard Eccles, Isabel Garcia-Dornal, Matthew Gemmill, Alessandro Gerada, PKF Gilmore, Richard Gregory, Ximeng Han, Catherine Hartley, Margaret Hughes, Miran Iltunza-Gomara, James Johnson, L Lluu, Jennifer Manson, Charlotte Nelson, Elaine O'Toole, Cassie Orlady, Rebekah Penrice-Handel, Lucile Rambow, N P Randie, Trevor Ian Robinson, Parul Sharma, Ghada T Shawli, James P Stewart, Neil Swainson, Eaterina Varnos, Joanne Wats, Mark Whitehead |
| EP1_SL_702840                               |  |  |  |  |  |  |  | Darren L Smith, Andrew Nelson, Matthew Bashton, Greg R Young, Joshua Loh, John Allen, Mohammad A Tariq, Giles S Holt, Gary Black, Wen C Yew, Lynn Dover, Paul Baker, Steve Liggitt, Sarah Essex, Jane Greenaway, Debra Padgett, Clive Graham, Darren Scott, Edward Barton, Emma Swindells, Brendan Payne, Jennifer Collins, Yusra Taha, Gary Ellingham                                                                                                                                                                                                                                                                                                                             |
| EP1_SL_702841                               |  |  |  |  |  |  |  | Dave J Baker, Gemma L Kay, Alp Aydin, Thanh Le-Viet, Steven Rudder, Ana P. Tedim, Anastasia Kolyva, Maria Diaz, Leonardo de Oliveira Martins, Nabil-Fareed Alhitan, Lizze Meadows, Rachael Stanley, Ngozi Elnunogo, Muhammad Yasar, Nicholas M. Thompson, Alexander J Trotter, Rachael Gilroy, Samuel Bloomfield, Claire Stuart, Andrew Bell, Reenesh Prakash, Sami Dervisevic, Alison E. Mathur, John Wain, Mark Webber, Andrew J. Page, Justin O'Grady                                                                                                                                                                                                                           |
| EP1_SL_702842, EP1_SL_702843                |  |  |  |  |  |  |  | Thushan de Silva, Matthew Parker, Nikki Smith, Adri Angyal, Rebecca Brown, Luke Green, Rachel Tucker, Paul Parsons, Danielle Groves, Katie Johnson, Laura Carriero, Alex Keeley, Dave Partridge, Matthew Wyles, Benjamin Lindsey, Mehmet Yavuz, Mohammad Raza, Carad Evans                                                                                                                                                                                                                                                                                                                                                                                                         |
| EP1_SL_702845                               |  |  |  |  |  |  |  |                                                                                                                                                                                                                                                                                                                                                                                                                                                                                                                                                                                                                                                                                    |
| EP1_SL_702846                               |  |  |  |  |  |  |  | Gemma Clark, Wendy Smith, Manjinder Khakh, Vicki M Fleming, Michelle M Lister, Hannah Howson-Wells, Jonathan Ball, Patrick McCure, Joseph Chappell, Theoclitus Tsileiolas, Nadine Holmes, Matthew Carlisle, Christopher Moore, Fai Sang, Johnny Debebe, Victoria Wright, Matthew Coose                                                                                                                                                                                                                                                                                                                                                                                             |
| EP1_SL_702847                               |  |  |  |  |  |  |  | Thushan de Silva, Matthew Parker, Nikki Smith, Adri Angyal, Rebecca Brown, Luke Green, Rachel Tucker, Paul Parsons, Danielle Groves, Katie Johnson, Laura Carriero, Alex Keeley, Dave Partridge, Matthew Wyles, Benjamin Lindsey, Mehmet Yavuz, Mohammad Raza, Carad Evans                                                                                                                                                                                                                                                                                                                                                                                                         |
| EP1_SL_702853, EP1_SL_702854, EP1_SL_702856 |  |  |  |  |  |  |  | Gemma Clark, Wendy Smith, Manjinder Khakh, Vicki M Fleming, Michelle M Lister, Hannah Howson-Wells, Jonathan Ball, Patrick McCure, Joseph Chappell, Theoclitus Tsileiolas, Nadine Holmes, Matthew Carlisle, Christopher Moore, Fai Sang, Johnny Debebe, Victoria Wright, Matthew Coose                                                                                                                                                                                                                                                                                                                                                                                             |
| EP1_SL_702867                               |  |  |  |  |  |  |  | Ana da Silva Filipe, Nafisha Johnson, Kathy Smollett, Daniel Mair, Stephen Carmichael, Alice Boos, Lily Tong, Janna Nichols, Kyriaki Nomiou, Sarah McQuaid, Richard Orton, Joseph Hughes, Sreenu Vairappalli, David L Robinson, Alasdair MacLellan, Rory Gunson, Shariq Shaaban, Matthew Holden, Rachel Bascow, Guy Mollatt, Kathy L, James Shepherd, Antonia Ho, Emma Thomson                                                                                                                                                                                                                                                                                                     |
| EP1_SL_702874, EP1_SL_702877, EP1_SL_702878 |  |  |  |  |  |  |  | Sam Haddenby, Anita Luczai, Steve Paterson, Julian Hiscox, Alistair Darcy, M Almsaud, A Alvezzali, Muhammad Atirwaili, Stuart D Armstrong, Jones Benjamin, Eleanor G Bentley, Anu Charwa, Jordan J Clark, Angela Cawell, Richard Eccles, Isabel Garcia-Dornal, Matthew Gemmill, Alessandro Gerada, PKF Gilmore, Richard Gregory, Ximeng Han, Catherine Hartley, Margaret Hughes, Miran Iltunza-Gomara, James Johnson, L Lluu, Jennifer Manson, Charlotte Nelson, Elaine O'Toole, Cassie Orlady, Rebekah Penrice-Handel, Lucile Rambow, N P Randie, Trevor Ian Robinson, Parul Sharma, Ghada T Shawli, James P Stewart, Neil Swainson, Eaterina Varnos, Joanne Wats, Mark Whitehead |
| EP1_SL_702890                               |  |  |  |  |  |  |  | Thushan de Silva, Matthew Parker, Nikki Smith, Adri Angyal, Rebecca Brown, Luke Green, Rachel Tucker, Paul Parsons, Danielle Groves, Katie Johnson, Laura Carriero, Alex Keeley, Dave Partridge, Matthew Wyles, Benjamin Lindsey, Mehmet Yavuz, Mohammad Raza, Carad Evans                                                                                                                                                                                                                                                                                                                                                                                                         |

EPI\_ISL\_702889  
Queens Medical Centre, Clinical Microbiology Department / DeepSeq Nottingham

EPI\_ISL\_702890  
Wales Specialist Virology Centre Sequencing lab: Pathogen Genomics Unit

EPI\_ISL\_702893  
West of Scotland Specialist Virology Centre, NHSGCG / MRC-University of Glasgow Centre for Virus Research

COVID-19 Genomics UK (COG-UK) Consortium  
COVID-19 Genomics UK (COG-UK) Consortium  
COVID-19 Genomics UK (COG-UK) Consortium

Gemma Clark, Wendy Smith, Manjinder Khakh, Vicki M Fleming, Michelle M Later, Hannah Howson-Wells, Jonathan Ball, Patrick McClure, Joseph Chappell, Theochanis Tsileidis, Nadine Holmes, Matthew Carlisle, Christopher Moore, Fei Sang, Johnny Debele, Victoria Wright, Matthew Loose  
Catherine Moore, Johnathan Evans, Laura Gifford, Malorie Perry, Simon Cottrell, Angela Marchbank, Alec Birtchley, Alexander Adams, Amy Gasikin, Bree Gatica-Wilcox, Sarah Fatchhani, Lee Scoutingate, Lauren Gilbert, Lee Graham, Nicole Fatchhani, Sara Kunzler-Summerhayes, Sarah Taylor, Sophie Jones, Sara Ray, Matthew Bui, Joanne Walkins, Sally Corden, Tom Connor  
Ana da Silva Filipe, Nafsa Johnson, Kathy Smolter, Daniel Mair, Stephen Carmichael, Alice Boes, Lily Tong, Jenna Nicolson, Kyriaki Nomiou, Sarah McDonald, Richard Orton, Joseph Hughes, Steenu Vaidiplaji, David L Robertson, Alasdair Maclean, Rory Gunnors, Sharif Shaaban, Matthew Holden, Rachel Biscoe, Guy Mollett, Kathy U, James Sheppard, Antonia Ho, Emma Thomson

EPI\_ISL\_702895  
Wales Specialist Virology Centre Sequencing lab: Pathogen Genomics Unit

COVID-19 Genomics UK (COG-UK) Consortium

Catherine Moore, Johnathan Evans, Laura Gifford, Malorie Perry, Simon Cottrell, Angela Marchbank, Alec Birtchley, Alexander Adams, Amy Gasikin, Bree Gatica-Wilcox, Jason Coombes, Joel Scoutingate, Lauren Gilbert, Lee Graham, Nicole Fatchhani, Sara Kunzler-Summerhayes, Sarah Taylor, Sophie Jones, Sara Ray, Matthew Bui, Joanne Walkins, Sally Corden, Tom Connor

EPI\_ISL\_702906  
Lighthouse Lab in Adeley Park

Wellcome Sanger Institute for the COVID-19 Genomics UK (COG-UK) Consortium

Jacquelyn Wynn, Mairead Hyland, The Lighthouse Lab in Adeley Park and Alex Alderton, Roberto Anado, Sonia Goncalves, Ewan Harrison, David K Jackson, Ian Johnston, Dominic Kwiatkowski, Cordelia Langford, John Sillito on behalf of the Wellcome Sanger Institute COVID-19 Surveillance Team

EPI\_ISL\_702917  
Liverpool Clinical Laboratories

COVID-19 Genomics UK (COG-UK) Consortium

Sam Hadenby, Anila Lucaci, Steve Paterson, Julian Hiscox, Alistair Darcy, M Aimsaud, A Alrezakhi, Muhammad Alirwali, Stuart D Armstrong, Jones Benjamin, Eleanor G Bentley, Anu Chawla, Jordan J Clark, Angela Cawell, Richard Eccles, Isabel Garcia-Donval, Matthew Gemmill, Alessandro Gerada, PKF Gilmore, Richard Gregory, Ximeng Han, Catherine Hartley, Margaret Hughes, Miran Iurtza-Gomara, James Johnson, L Liu, Jennifer Manson, Charlotte Nelson, Elaine O'Toole, Casisse Orlaolu, Rebekah Penrice-Handel, Lucille Rahnbow, N P Randle, Trevor Ian Robinson, Parul Sharma, Ghada T Shawli, James P Stewart, Neil Swainston, Eaterina Varnos, Joanne Waiats, Mark Whitehead

EPI\_ISL\_702923  
Lighthouse Lab in Adeley Park

Wellcome Sanger Institute for the COVID-19 Genomics UK (COG-UK) Consortium

Jacquelyn Wynn, Mairead Hyland, The Lighthouse Lab in Adeley Park and Alex Alderton, Roberto Anado, Sonia Goncalves, Ewan Harrison, David K Jackson, Ian Johnston, Dominic Kwiatkowski, Cordelia Langford, John Sillito on behalf of the Wellcome Sanger Institute COVID-19 Surveillance Team

EPI\_ISL\_702933  
Lighthouse Lab in Adeley Park

EPI\_ISL\_702935  
Liverpool Clinical Laboratories

Wellcome Sanger Institute for the COVID-19 Genomics UK (COG-UK) Consortium  
COVID-19 Genomics UK (COG-UK) Consortium

Jacquelyn Wynn, Mairead Hyland, The Lighthouse Lab in Adeley Park and Alex Alderton, Roberto Anado, Sonia Goncalves, Ewan Harrison, David K Jackson, Ian Johnston, Dominic Kwiatkowski, Cordelia Langford, John Sillito on behalf of the Wellcome Sanger Institute COVID-19 Surveillance Team

EPI\_ISL\_702940  
Lighthouse Lab in Adeley Park

EPI\_ISL\_702945  
Liverpool Clinical Laboratories

EPI\_ISL\_702948  
Liverpool Clinical Laboratories

EPI\_ISL\_702950  
Liverpool Clinical Laboratories

Wellcome Sanger Institute for the COVID-19 Genomics UK (COG-UK) Consortium

Jacquelyn Wynn, Mairead Hyland, The Lighthouse Lab in Adeley Park and Alex Alderton, Roberto Anado, Sonia Goncalves, Ewan Harrison, David K Jackson, Ian Johnston, Dominic Kwiatkowski, Cordelia Langford, John Sillito on behalf of the Wellcome Sanger Institute COVID-19 Surveillance Team

EPI\_ISL\_702951  
Lighthouse Lab in Adeley Park

Wellcome Sanger Institute for the COVID-19 Genomics UK (COG-UK) Consortium

Jacquelyn Wynn, Mairead Hyland, The Lighthouse Lab in Adeley Park and Alex Alderton, Roberto Anado, Sonia Goncalves, Ewan Harrison, David K Jackson, Ian Johnston, Dominic Kwiatkowski, Cordelia Langford, John Sillito on behalf of the Wellcome Sanger Institute COVID-19 Surveillance Team

EPI\_ISL\_702956  
Liverpool Clinical Laboratories

COVID-19 Genomics UK (COG-UK) Consortium

Sam Hadenby, Anila Lucaci, Steve Paterson, Julian Hiscox, Alistair Darcy, M Aimsaud, A Alrezakhi, Muhammad Alirwali, Stuart D Armstrong, Jones Benjamin, Eleanor G Bentley, Anu Chawla, Jordan J Clark, Angela Cawell, Richard Eccles, Isabel Garcia-Donval, Matthew Gemmill, Alessandro Gerada, PKF Gilmore, Richard Gregory, Ximeng Han, Catherine Hartley, Margaret Hughes, Miran Iurtza-Gomara, James Johnson, L Liu, Jennifer Manson, Charlotte Nelson, Elaine O'Toole, Casisse Orlaolu, Rebekah Penrice-Handel, Lucille Rahnbow, N P Randle, Trevor Ian Robinson, Parul Sharma, Ghada T Shawli, James P Stewart, Neil Swainston, Eaterina Varnos, Joanne Waiats, Mark Whitehead

EPI\_ISL\_702957  
Lighthouse Lab in Adeley Park

Wellcome Sanger Institute for the COVID-19 Genomics UK (COG-UK) Consortium

Jacquelyn Wynn, Mairead Hyland, The Lighthouse Lab in Adeley Park and Alex Alderton, Roberto Anado, Sonia Goncalves, Ewan Harrison, David K Jackson, Ian Johnston, Dominic Kwiatkowski, Cordelia Langford, John Sillito on behalf of the Wellcome Sanger Institute COVID-19 Surveillance Team

EPI\_ISL\_702974  
Liverpool Clinical Laboratories

COVID-19 Genomics UK (COG-UK) Consortium

Sam Hadenby, Anila Lucaci, Steve Paterson, Julian Hiscox, Alistair Darcy, M Aimsaud, A Alrezakhi, Muhammad Alirwali, Stuart D Armstrong, Jones Benjamin, Eleanor G Bentley, Anu Chawla, Jordan J Clark, Angela Cawell, Richard Eccles, Isabel Garcia-Donval, Matthew Gemmill, Alessandro Gerada, PKF Gilmore, Richard Gregory, Ximeng Han, Catherine Hartley, Margaret Hughes, Miran Iurtza-Gomara, James Johnson, L Liu, Jennifer Manson, Charlotte Nelson, Elaine O'Toole, Casisse Orlaolu, Rebekah Penrice-Handel, Lucille Rahnbow, N P Randle, Trevor Ian Robinson, Parul Sharma, Ghada T Shawli, James P Stewart, Neil Swainston, Eaterina Varnos, Joanne Waiats, Mark Whitehead

EPI\_ISL\_702975  
Lighthouse Lab in Adeley Park

Wellcome Sanger Institute for the COVID-19 Genomics UK (COG-UK) Consortium

Jacquelyn Wynn, Mairead Hyland, The Lighthouse Lab in Adeley Park and Alex Alderton, Roberto Anado, Sonia Goncalves, Ewan Harrison, David K Jackson, Ian Johnston, Dominic Kwiatkowski, Cordelia Langford, John Sillito on behalf of the Wellcome Sanger Institute COVID-19 Surveillance Team

EPI\_ISL\_702977  
Department of Pathology, University of Cambridge

COVID-19 Genomics UK (COG-UK) Consortium

Aminu S. Jaruru, Yashmin Chaudhry, Grant Hall, Iliana Georgina, Myra Hosmioli, Martin D. Curran, Malie Pickett, Surendra Panwar, Ian Goodfellow Team

EPI\_ISL\_702980  
Liverpool Clinical Laboratories

COVID-19 Genomics UK (COG-UK) Consortium

Sam Hadenby, Anila Lucaci, Steve Paterson, Julian Hiscox, Alistair Darcy, M Aimsaud, A Alrezakhi, Muhammad Alirwali, Stuart D Armstrong, Jones Benjamin, Eleanor G Bentley, Anu Chawla, Jordan J Clark, Angela Cawell, Richard Eccles, Isabel Garcia-Donval, Matthew Gemmill, Alessandro Gerada, PKF Gilmore, Richard Gregory, Ximeng Han, Catherine Hartley, Margaret Hughes, Miran Iurtza-Gomara, James Johnson, L Liu, Jennifer Manson, Charlotte Nelson, Elaine O'Toole, Casisse Orlaolu, Rebekah Penrice-Handel, Lucille Rahnbow, N P Randle, Trevor Ian Robinson, Parul Sharma, Ghada T Shawli, James P Stewart, Neil Swainston, Eaterina Varnos, Joanne Waiats, Mark Whitehead

EPI\_ISL\_702982  
Northumbria University / South Tees Hospitals NHS Foundation Trust / North Tees and Hartlepool NHS Foundation Trust / Newcastle Hospitals NHS Foundation Trust

COVID-19 Genomics UK (COG-UK) Consortium

Darren L Smith, Andrew Nelson, Matthew Bashon, Greg R Young, Joshua Lon, John Allen, Mohammad A, Tarq, Giles S Holt, Gary Black, Wen C Yew, Lynn Dover, Paul Baker, Steve Uggell, Sarah Essex, Jane Greenway, Debra Padgett, Olive Graham, Carmen Scott, Edward Barton, Emma Swindells, Brendan Payne, Jennifer Collins, Yusra Tahra, Gary Ellingham

EPI\_ISL\_702984  
Lighthouse Lab in Adeley Park

EPI\_ISL\_702987  
Centre for Enzyme Innovation, University of Portsmouth / Translational Research Laboratory, Portsmouth Hospitals NHS Trust

Wellcome Sanger Institute for the COVID-19 Genomics UK (COG-UK) Consortium  
COVID-19 Genomics UK (COG-UK) Consortium

Jacquelyn Wynn, Mairead Hyland, The Lighthouse Lab in Adeley Park and Alex Alderton, Roberto Anado, Sonia Goncalves, Ewan Harrison, David K Jackson, Ian Johnston, Dominic Kwiatkowski, Cordelia Langford, John Sillito on behalf of the Wellcome Sanger Institute COVID-19 Surveillance Team

EPI\_ISL\_702988  
Lighthouse Lab in Adeley Park

EPI\_ISL\_702990  
Northumbria University / South Tees Hospitals NHS Foundation Trust / North Tees and Hartlepool NHS Foundation Trust / North Tees and Hartlepool NHS Foundation Trust

Wellcome Sanger Institute for the COVID-19 Genomics UK (COG-UK) Consortium  
COVID-19 Genomics UK (COG-UK) Consortium

Jacquelyn Wynn, Mairead Hyland, The Lighthouse Lab in Adeley Park and Alex Alderton, Roberto Anado, Sonia Goncalves, Ewan Harrison, David K Jackson, Ian Johnston, Dominic Kwiatkowski, Cordelia Langford, John Sillito on behalf of the Wellcome Sanger Institute COVID-19 Surveillance Team

Darren L Smith, Andrew Nelson, Matthew Bashon, Greg R Young, Joshua Lon, John Allen, Mohammad A, Tarq, Giles S Holt, Gary Black, Wen C Yew, Lynn Dover, Paul Baker, Steve Uggell, Sarah Essex, Jane Greenway, Debra Padgett, Olive Graham, Carmen Scott, Edward Barton, Emma Swindells, Brendan Payne, Jennifer Collins, Yusra Tahra, Gary Ellingham



|                                                |                                                                                                                                                                                                                     |                                                                            |                                                                                                                                                                                                                                                                                                                                                                                                                                                                                                                                                                                                                                                                                    |
|------------------------------------------------|---------------------------------------------------------------------------------------------------------------------------------------------------------------------------------------------------------------------|----------------------------------------------------------------------------|------------------------------------------------------------------------------------------------------------------------------------------------------------------------------------------------------------------------------------------------------------------------------------------------------------------------------------------------------------------------------------------------------------------------------------------------------------------------------------------------------------------------------------------------------------------------------------------------------------------------------------------------------------------------------------|
| EPI_ISL_703093                                 | Department of Pathology, University of Cambridge                                                                                                                                                                    | COVID-19 Genomics UK (COG-UK) Consortium                                   | Aminu S. Jabun, Yasmin Chaudhry, Grant Hall, Iliana Georgiana, Myra Hosmillo, Martin D. Curran, Maïte Prickett, Surendra Parmar, Ian Goodfellow                                                                                                                                                                                                                                                                                                                                                                                                                                                                                                                                    |
| EPI_ISL_703096                                 | Northumbria University / South Tees Hospitals NHS Foundation Trust / North Cumbria Integrated Care NHS Foundation Trust / North Tees and Hartlepool NHS Foundation Trust / Newcastle Hospitals NHS Foundation Trust | COVID-19 Genomics UK (COG-UK) Consortium                                   | Darren L Smith, Andrew Nelson, Matthew Bashiron, Gagg R Young, Joshua Loh, John Ailan, Mohammad A Tariq, Giles S Holt, Gary Black, Wen C Yew, Lynn Dover, Paul Baker, Steve Liggitt, Sarah Essex, Jane Greenaway, Debra Padgett, Coive Graham, Gáram Scott, Edward Barton, Emma Swaddels, Brendan Payne, Jennifer Collins, Yusra Taha, Gary Eltringham                                                                                                                                                                                                                                                                                                                             |
| EPI_ISL_703100                                 | Lighthouse Lab in Adeley Park                                                                                                                                                                                       | Wellcome Sanger Institute for the COVID-19 Genomics UK (COG-UK) Consortium | Jacquelyn Wynn, Mairead Hyland, The Lighthouse Lab in Adeley Park and Alex Alderton, Roberto Anato, Sonia Goncalves, Ewan Harrison, David K Jackson, Ian Johnston, Dominic Kwiatkowski, Cordelia Langford, John Sillito on behalf of the Wellcome Sanger Institute COVID-19 Surveillance Team                                                                                                                                                                                                                                                                                                                                                                                      |
| EPI_ISL_703102                                 | Liverpool Clinical Laboratories                                                                                                                                                                                     | COVID-19 Genomics UK (COG-UK) Consortium                                   | Sam Hadenby, Anita Luczai, Steve Paterson, Julian Hiscox, Alistair Darby, M Aimsaud, A Alvezzahi, Muhammad Alruwaili, Stuart D Armstrong, Jones Benjamin, Eleanor G Bentley, Anu Chawla, Jordan J Clark, Angela Cowell, Richard Eccles, Isabel Garcia-Donval, Matthew Gemmill, Alessandro Gerada, PFR Gilmore, Richard Gregory, Ximeng Han, Catherine Hartley, Margaret Hughes, Miran Turzta-Gomara, James Johnson, L Llu, Jenifer Manson, Charlotte Nelson, Elaine O'Toole, Cassie Orlaolu, Rebekah Penrice-Handel, Lucille Rahnov, N P Randle, Trevor Ian Robinson, Parul Sharma, Ghada T Shawli, James P Stewart, Neil Swainson, Ecaterina Varnos, Joanne Watts, Mark Whitehead |
| EPI_ISL_703106                                 | Lighthouse Lab in Adeley Park                                                                                                                                                                                       | Wellcome Sanger Institute for the COVID-19 Genomics UK (COG-UK) Consortium | Jacquelyn Wynn, Mairead Hyland, The Lighthouse Lab in Adeley Park and Alex Alderton, Roberto Anato, Sonia Goncalves, Ewan Harrison, David K Jackson, Ian Johnston, Dominic Kwiatkowski, Cordelia Langford, John Sillito on behalf of the Wellcome Sanger Institute COVID-19 Surveillance Team                                                                                                                                                                                                                                                                                                                                                                                      |
| EPI_ISL_703110                                 | Liverpool Clinical Laboratories                                                                                                                                                                                     | COVID-19 Genomics UK (COG-UK) Consortium                                   | Sam Hadenby, Anita Luczai, Steve Paterson, Julian Hiscox, Alistair Darby, M Aimsaud, A Alvezzahi, Muhammad Alruwaili, Stuart D Armstrong, Jones Benjamin, Eleanor G Bentley, Anu Chawla, Jordan J Clark, Angela Cowell, Richard Eccles, Isabel Garcia-Donval, Matthew Gemmill, Alessandro Gerada, PFR Gilmore, Richard Gregory, Ximeng Han, Catherine Hartley, Margaret Hughes, Miran Turzta-Gomara, James Johnson, L Llu, Jenifer Manson, Charlotte Nelson, Elaine O'Toole, Cassie Orlaolu, Rebekah Penrice-Handel, Lucille Rahnov, N P Randle, Trevor Ian Robinson, Parul Sharma, Ghada T Shawli, James P Stewart, Neil Swainson, Ecaterina Varnos, Joanne Watts, Mark Whitehead |
| EPI_ISL_703112, EPI_ISL_703114                 | Lighthouse Lab in Adeley Park                                                                                                                                                                                       | Wellcome Sanger Institute for the COVID-19 Genomics UK (COG-UK) Consortium | Jacquelyn Wynn, Mairead Hyland, The Lighthouse Lab in Adeley Park and Alex Alderton, Roberto Anato, Sonia Goncalves, Ewan Harrison, David K Jackson, Ian Johnston, Dominic Kwiatkowski, Cordelia Langford, John Sillito on behalf of the Wellcome Sanger Institute COVID-19 Surveillance Team                                                                                                                                                                                                                                                                                                                                                                                      |
| EPI_ISL_703115, EPI_ISL_703118                 | Department of Pathology, University of Cambridge                                                                                                                                                                    | COVID-19 Genomics UK (COG-UK) Consortium                                   | Aminu S. Jabun, Yasmin Chaudhry, Grant Hall, Iliana Georgiana, Myra Hosmillo, Martin D. Curran, Maïte Prickett, Surendra Parmar, Ian Goodfellow                                                                                                                                                                                                                                                                                                                                                                                                                                                                                                                                    |
| EPI_ISL_703120, EPI_ISL_703122, EPI_ISL_703126 | Lighthouse Lab in Adeley Park                                                                                                                                                                                       | Wellcome Sanger Institute for the COVID-19 Genomics UK (COG-UK) Consortium | Jacquelyn Wynn, Mairead Hyland, The Lighthouse Lab in Adeley Park and Alex Alderton, Roberto Anato, Sonia Goncalves, Ewan Harrison, David K Jackson, Ian Johnston, Dominic Kwiatkowski, Cordelia Langford, John Sillito on behalf of the Wellcome Sanger Institute COVID-19 Surveillance Team                                                                                                                                                                                                                                                                                                                                                                                      |
| EPI_ISL_703133                                 | Virology Department, Sheffield Teaching Hospitals NHS Foundation Trust, Department of Infection, Immunity and Cardiovascular Disease, The Medical School, University of Sheffield                                   | COVID-19 Genomics UK (COG-UK) Consortium                                   | Thushan de Silva, Matthew Parker, Nikki Smith, Adir Anygal, Rebecca Brown, Luke Green, Rachel Tucker, Paul Parsons, Danielle Groves, Katie Johnson, Laura Carrilero, Alex Keesley, Dave Partridge, Matthew Wyles, Benjamin Lindsey, Mehina Yavuz, Mohammad Raza, Carad Evans                                                                                                                                                                                                                                                                                                                                                                                                       |
| EPI_ISL_703134                                 | Lighthouse Lab in Adeley Park                                                                                                                                                                                       | Wellcome Sanger Institute for the COVID-19 Genomics UK (COG-UK) Consortium | Jacquelyn Wynn, Mairead Hyland, The Lighthouse Lab in Adeley Park and Alex Alderton, Roberto Anato, Sonia Goncalves, Ewan Harrison, David K Jackson, Ian Johnston, Dominic Kwiatkowski, Cordelia Langford, John Sillito on behalf of the Wellcome Sanger Institute COVID-19 Surveillance Team                                                                                                                                                                                                                                                                                                                                                                                      |
| EPI_ISL_703136                                 | West of Scotland Specialist Virology Centre, NHSGSGC / MRC-University of Glasgow Centre for Virus Research                                                                                                          | COVID-19 Genomics UK (COG-UK) Consortium                                   | Anna de Silva, Filipa, Natasha Johnson, Katy Snodden, Daniela Mar, Stephen Carmichael, Alice Bence, Lily Tong, James Nichols, Kyriaki Ntomika, Sarah McDonald, Richard Orton, Joseph Hughes, Steen Veldhuyzen, David L Robinson, Alexander Merclean, Rory Green, Sharif Shaaban, Matthew Holder, Rachel Blazov, Guy Mellett, Kathy L, James Shepherd, Antonia Ho, Emma Thomson                                                                                                                                                                                                                                                                                                     |
| EPI_ISL_703139                                 | Wales Specialist Virology Centre Sequencing lab: Pathogen Genomics Unit                                                                                                                                             | COVID-19 Genomics UK (COG-UK) Consortium                                   | Catherine Moore, Jonathan Evans, Laura Gifford, Malorie Parry, Simon Cortell, Angela Marchbank, Alec Birtley, Alexander Adams, Amy Gaskin, Bree Gatica-Wilcox, Jason Coombes, Joel Southgate, Lauren Gilbert, Lee Graham, Nicole Pochiniati, Sara Kunziane-Summerhayes, Sarah Taylor, Sophie Jones, Sara Ray, Matthew Bull, Joanne Watkins, Sally Corbett, Tom Connor                                                                                                                                                                                                                                                                                                              |
| EPI_ISL_703142, EPI_ISL_703143                 | Lighthouse Lab in Adeley Park                                                                                                                                                                                       | Wellcome Sanger Institute for the COVID-19 Genomics UK (COG-UK) Consortium | Jacquelyn Wynn, Mairead Hyland, The Lighthouse Lab in Adeley Park and Alex Alderton, Roberto Anato, Sonia Goncalves, Ewan Harrison, David K Jackson, Ian Johnston, Dominic Kwiatkowski, Cordelia Langford, John Sillito on behalf of the Wellcome Sanger Institute COVID-19 Surveillance Team                                                                                                                                                                                                                                                                                                                                                                                      |
| EPI_ISL_703147, EPI_ISL_703150                 | Liverpool Clinical Laboratories                                                                                                                                                                                     | COVID-19 Genomics UK (COG-UK) Consortium                                   | Sam Hadenby, Anita Luczai, Steve Paterson, Julian Hiscox, Alistair Darby, M Aimsaud, A Alvezzahi, Muhammad Alruwaili, Stuart D Armstrong, Jones Benjamin, Eleanor G Bentley, Anu Chawla, Jordan J Clark, Angela Cowell, Richard Eccles, Isabel Garcia-Donval, Matthew Gemmill, Alessandro Gerada, PFR Gilmore, Richard Gregory, Ximeng Han, Catherine Hartley, Margaret Hughes, Miran Turzta-Gomara, James Johnson, L Llu, Jenifer Manson, Charlotte Nelson, Elaine O'Toole, Cassie Orlaolu, Rebekah Penrice-Handel, Lucille Rahnov, N P Randle, Trevor Ian Robinson, Parul Sharma, Ghada T Shawli, James P Stewart, Neil Swainson, Ecaterina Varnos, Joanne Watts, Mark Whitehead |
| EPI_ISL_703153, EPI_ISL_703156                 | Lighthouse Lab in Adeley Park                                                                                                                                                                                       | Wellcome Sanger Institute for the COVID-19 Genomics UK (COG-UK) Consortium | Jacquelyn Wynn, Mairead Hyland, The Lighthouse Lab in Adeley Park and Alex Alderton, Roberto Anato, Sonia Goncalves, Ewan Harrison, David K Jackson, Ian Johnston, Dominic Kwiatkowski, Cordelia Langford, John Sillito on behalf of the Wellcome Sanger Institute COVID-19 Surveillance Team                                                                                                                                                                                                                                                                                                                                                                                      |
| EPI_ISL_703158                                 | Liverpool Clinical Laboratories                                                                                                                                                                                     | COVID-19 Genomics UK (COG-UK) Consortium                                   | Sam Hadenby, Anita Luczai, Steve Paterson, Julian Hiscox, Alistair Darby, M Aimsaud, A Alvezzahi, Muhammad Alruwaili, Stuart D Armstrong, Jones Benjamin, Eleanor G Bentley, Anu Chawla, Jordan J Clark, Angela Cowell, Richard Eccles, Isabel Garcia-Donval, Matthew Gemmill, Alessandro Gerada, PFR Gilmore, Richard Gregory, Ximeng Han, Catherine Hartley, Margaret Hughes, Miran Turzta-Gomara, James Johnson, L Llu, Jenifer Manson, Charlotte Nelson, Elaine O'Toole, Cassie Orlaolu, Rebekah Penrice-Handel, Lucille Rahnov, N P Randle, Trevor Ian Robinson, Parul Sharma, Ghada T Shawli, James P Stewart, Neil Swainson, Ecaterina Varnos, Joanne Watts, Mark Whitehead |
| EPI_ISL_703159, EPI_ISL_703160                 | Lighthouse Lab in Adeley Park                                                                                                                                                                                       | Wellcome Sanger Institute for the COVID-19 Genomics UK (COG-UK) Consortium | Jacquelyn Wynn, Mairead Hyland, The Lighthouse Lab in Adeley Park and Alex Alderton, Roberto Anato, Sonia Goncalves, Ewan Harrison, David K Jackson, Ian Johnston, Dominic Kwiatkowski, Cordelia Langford, John Sillito on behalf of the Wellcome Sanger Institute COVID-19 Surveillance Team                                                                                                                                                                                                                                                                                                                                                                                      |
| EPI_ISL_703162                                 | Liverpool Clinical Laboratories                                                                                                                                                                                     | COVID-19 Genomics UK (COG-UK) Consortium                                   | Sam Hadenby, Anita Luczai, Steve Paterson, Julian Hiscox, Alistair Darby, M Aimsaud, A Alvezzahi, Muhammad Alruwaili, Stuart D Armstrong, Jones Benjamin, Eleanor G Bentley, Anu Chawla, Jordan J Clark, Angela Cowell, Richard Eccles, Isabel Garcia-Donval, Matthew Gemmill, Alessandro Gerada, PFR Gilmore, Richard Gregory, Ximeng Han, Catherine Hartley, Margaret Hughes, Miran Turzta-Gomara, James Johnson, L Llu, Jenifer Manson, Charlotte Nelson, Elaine O'Toole, Cassie Orlaolu, Rebekah Penrice-Handel, Lucille Rahnov, N P Randle, Trevor Ian Robinson, Parul Sharma, Ghada T Shawli, James P Stewart, Neil Swainson, Ecaterina Varnos, Joanne Watts, Mark Whitehead |
| EPI_ISL_703166                                 | Lighthouse Lab in Adeley Park                                                                                                                                                                                       | Wellcome Sanger Institute for the COVID-19 Genomics UK (COG-UK) Consortium | Jacquelyn Wynn, Mairead Hyland, The Lighthouse Lab in Adeley Park and Alex Alderton, Roberto Anato, Sonia Goncalves, Ewan Harrison, David K Jackson, Ian Johnston, Dominic Kwiatkowski, Cordelia Langford, John Sillito on behalf of the Wellcome Sanger Institute COVID-19 Surveillance Team                                                                                                                                                                                                                                                                                                                                                                                      |
| EPI_ISL_703167                                 | Liverpool Clinical Laboratories                                                                                                                                                                                     | COVID-19 Genomics UK (COG-UK) Consortium                                   | Sam Hadenby, Anita Luczai, Steve Paterson, Julian Hiscox, Alistair Darby, M Aimsaud, A Alvezzahi, Muhammad Alruwaili, Stuart D Armstrong, Jones Benjamin, Eleanor G Bentley, Anu Chawla, Jordan J Clark, Angela Cowell, Richard Eccles, Isabel Garcia-Donval, Matthew Gemmill, Alessandro Gerada, PFR Gilmore, Richard Gregory, Ximeng Han, Catherine Hartley, Margaret Hughes, Miran Turzta-Gomara, James Johnson, L Llu, Jenifer Manson, Charlotte Nelson, Elaine O'Toole, Cassie Orlaolu, Rebekah Penrice-Handel, Lucille Rahnov, N P Randle, Trevor Ian Robinson, Parul Sharma, Ghada T Shawli, James P Stewart, Neil Swainson, Ecaterina Varnos, Joanne Watts, Mark Whitehead |
| EPI_ISL_703173                                 | Lighthouse Lab in Adeley Park                                                                                                                                                                                       | Wellcome Sanger Institute for the COVID-19 Genomics UK (COG-UK) Consortium | Jacquelyn Wynn, Mairead Hyland, The Lighthouse Lab in Adeley Park and Alex Alderton, Roberto Anato, Sonia Goncalves, Ewan Harrison, David K Jackson, Ian Johnston, Dominic Kwiatkowski, Cordelia Langford, John Sillito on behalf of the Wellcome Sanger Institute COVID-19 Surveillance Team                                                                                                                                                                                                                                                                                                                                                                                      |
| EPI_ISL_703174, EPI_ISL_703176, EPI_ISL_703182 | Liverpool Clinical Laboratories                                                                                                                                                                                     | COVID-19 Genomics UK (COG-UK) Consortium                                   | Sam Hadenby, Anita Luczai, Steve Paterson, Julian Hiscox, Alistair Darby, M Aimsaud, A Alvezzahi, Muhammad Alruwaili, Stuart D Armstrong, Jones Benjamin, Eleanor G Bentley, Anu Chawla, Jordan J Clark, Angela Cowell, Richard Eccles, Isabel Garcia-Donval, Matthew Gemmill, Alessandro Gerada, PFR Gilmore, Richard Gregory, Ximeng Han, Catherine Hartley, Margaret Hughes, Miran Turzta-Gomara, James Johnson, L Llu, Jenifer Manson, Charlotte Nelson, Elaine O'Toole, Cassie Orlaolu, Rebekah Penrice-Handel, Lucille Rahnov, N P Randle, Trevor Ian Robinson, Parul Sharma, Ghada T Shawli, James P Stewart, Neil Swainson, Ecaterina Varnos, Joanne Watts, Mark Whitehead |
| EPI_ISL_703183                                 | Lighthouse Lab in Adeley Park                                                                                                                                                                                       | Wellcome Sanger Institute for the COVID-19 Genomics UK (COG-UK) Consortium | Jacquelyn Wynn, Mairead Hyland, The Lighthouse Lab in Adeley Park and Alex Alderton, Roberto Anato, Sonia Goncalves, Ewan Harrison, David K Jackson, Ian Johnston, Dominic Kwiatkowski, Cordelia Langford, John Sillito on behalf of the Wellcome Sanger Institute COVID-19 Surveillance Team                                                                                                                                                                                                                                                                                                                                                                                      |
| EPI_ISL_703184                                 | Liverpool Clinical Laboratories                                                                                                                                                                                     | COVID-19 Genomics UK (COG-UK) Consortium                                   | Sam Hadenby, Anita Luczai, Steve Paterson, Julian Hiscox, Alistair Darby, M Aimsaud, A Alvezzahi, Muhammad Alruwaili, Stuart D Armstrong, Jones Benjamin, Eleanor G Bentley, Anu Chawla, Jordan J Clark, Angela Cowell, Richard Eccles, Isabel Garcia-Donval, Matthew Gemmill, Alessandro Gerada, PFR Gilmore, Richard Gregory, Ximeng Han, Catherine Hartley, Margaret Hughes, Miran Turzta-Gomara, James Johnson, L Llu, Jenifer Manson, Charlotte Nelson, Elaine O'Toole, Cassie Orlaolu, Rebekah Penrice-Handel, Lucille Rahnov, N P Randle, Trevor Ian Robinson, Parul Sharma, Ghada T Shawli, James P Stewart, Neil Swainson, Ecaterina Varnos, Joanne Watts, Mark Whitehead |

|                                                                |                                                                                                                                                                                                 |                                                                            |                                                                                                                                                                                                                                                                                                                                                                                                                                                                                                                                                                                                                                                                                    |
|----------------------------------------------------------------|-------------------------------------------------------------------------------------------------------------------------------------------------------------------------------------------------|----------------------------------------------------------------------------|------------------------------------------------------------------------------------------------------------------------------------------------------------------------------------------------------------------------------------------------------------------------------------------------------------------------------------------------------------------------------------------------------------------------------------------------------------------------------------------------------------------------------------------------------------------------------------------------------------------------------------------------------------------------------------|
| EPI_ISL_703185                                                 | Lighthouse Lab in Aderley Park                                                                                                                                                                  | Wellcome Sanger Institute for the COVID-19 Genomics UK (COG-UK) Consortium | Jacquelyn Wynn, Mairead Hyland, The Lighthouse Lab in Aderley Park and Alex Alderton, Roberto Amato, Sonia Goncalves, Ewan Harrison, David K. Jackson, Ian Johnston, Dominic Kwiatkowski, Cordelia Langford, John Sillito on behalf of the Wellcome Sanger Institute COVID-19 Surveillance Team                                                                                                                                                                                                                                                                                                                                                                                    |
| EPI_ISL_703192                                                 | West of Scotland Specialist Virology Centre, NHSGGC / MRC-University of Glasgow Centre for Virus Research                                                                                       | COVID-19 Genomics UK (COG-UK) Consortium                                   | PKF Gilmore, Richard Gregory, Ximeng Han, Catherine Hartley, Margaret Hughes, Miran Ijurza-Gomara, James Johnson, L. Liu, Jennifer Manson, Charlotte Nelson, Elaine O'Toole, Neil Swainson, Eaterina Varnos, Joanna Waiats, Mark Whitehead                                                                                                                                                                                                                                                                                                                                                                                                                                         |
| EPI_ISL_703198                                                 | Virology Department, Royal Infirmary of Edinburgh, NHS Lothian / School of Biological Sciences, University of Edinburgh / Institute of Genetics and Molecular Medicine, University of Edinburgh | COVID-19 Genomics UK (COG-UK) Consortium                                   | Jacquelyn Wynn, Mairead Hyland, The Lighthouse Lab in Aderley Park and Alex Alderton, Roberto Amato, Sonia Goncalves, Ewan Harrison, David K. Jackson, Ian Johnston, Dominic Kwiatkowski, Cordelia Langford, John Sillito on behalf of the Wellcome Sanger Institute COVID-19 Surveillance Team                                                                                                                                                                                                                                                                                                                                                                                    |
| EPI_ISL_703207                                                 | Lighthouse Lab in Aderley Park                                                                                                                                                                  | Wellcome Sanger Institute for the COVID-19 Genomics UK (COG-UK) Consortium | Ana da Silva Filipe, Natasha Johnson, Kathy Snodlett, Daniel Mar, Stephen Carmichael, Alice Brooks, Lily Tong, Jenna Nichols, Kyriaki Nomioku, Sarah McDonald, Richard Otron, Joseph Hughes, Sreeni Vaidikpally, David L Robertson, Alasdair MacLean, Rory Gurnson, Sharif Shaaban, Matthew Holden, Rachel Blacow, Guy Mollath, Kathy L, James Shephard, Antonia Ho, Emma Thomson                                                                                                                                                                                                                                                                                                  |
| EPI_ISL_703208                                                 | Liverpool Clinical Laboratories                                                                                                                                                                 | COVID-19 Genomics UK (COG-UK) Consortium                                   | McHugh M, Dewar R, Rooke S, Gallagher M, Balcaza C, O'Toole A, Scher E, Hill V, McCrone JT, Colquhoun R, Yu X, Jackson B, Rambaut A, Williams TC, Templeton K                                                                                                                                                                                                                                                                                                                                                                                                                                                                                                                      |
| EPI_ISL_703212                                                 | Lighthouse Lab in Aderley Park                                                                                                                                                                  | Wellcome Sanger Institute for the COVID-19 Genomics UK (COG-UK) Consortium | Jacquelyn Wynn, Mairead Hyland, The Lighthouse Lab in Aderley Park and Alex Alderton, Roberto Amato, Sonia Goncalves, Ewan Harrison, David K. Jackson, Ian Johnston, Dominic Kwiatkowski, Cordelia Langford, John Sillito on behalf of the Wellcome Sanger Institute COVID-19 Surveillance Team                                                                                                                                                                                                                                                                                                                                                                                    |
| EPI_ISL_703216                                                 | Liverpool Clinical Laboratories                                                                                                                                                                 | COVID-19 Genomics UK (COG-UK) Consortium                                   | Sam Hadenby, Anita Lucsd, Steve Paterson, Julian Hiscox, Alistair Darby, M Almsaudi, A Alzeizhi, Muhammad Alruwaili, Stuart D Armstrong, Jones Benjamin, Eleanor G Bentley, Anu Chawla, Jordan J Clark, Angela Cowell, Richard Eccles, Isabel Garcia-Donval, Matthew Gemmill, Alessandro Gerada, PKF Gilmore, Richard Gregory, Ximeng Han, Catherine Hartley, Margaret Hughes, Miran Ijurza-Gomara, James Johnson, L. Liu, Jennifer Manson, Charlotte Nelson, Elaine O'Toole, Cassie Orlady, Rebekah Penrice-Handel, Lucille Rahnov, N P Randle, Trevor Ian Robinson, Parul Sharma, Ghada T Shawil, James P Stewart, Neil Swainson, Eaterina Varnos, Joanna Waiats, Mark Whitehead |
| EPI_ISL_703224, EPI_ISL_703226                                 | Lighthouse Lab in Aderley Park                                                                                                                                                                  | Wellcome Sanger Institute for the COVID-19 Genomics UK (COG-UK) Consortium | Jacquelyn Wynn, Mairead Hyland, The Lighthouse Lab in Aderley Park and Alex Alderton, Roberto Amato, Sonia Goncalves, Ewan Harrison, David K. Jackson, Ian Johnston, Dominic Kwiatkowski, Cordelia Langford, John Sillito on behalf of the Wellcome Sanger Institute COVID-19 Surveillance Team                                                                                                                                                                                                                                                                                                                                                                                    |
| EPI_ISL_703227                                                 | Wales Specialist Virology Centre Sequencing lab: Pathogen Genomics Unit                                                                                                                         | COVID-19 Genomics UK (COG-UK) Consortium                                   | Catherine Moore, Johnathan Evans, Laura Gifford, Malorie Parry, Simon Cortell, Angela Marchbank, Alec Birchley, Alexander Adams, Amy Gaslin, Bree Gatica-Wilcox, Jason Coombes, Joel Southgate, Lauren Gilbert, Lee Graham, Nicole Paschallani, Sara Kunziane-Summerhayes, Sarah Taylor, Sophie Jones, Sara Ray, Matthew Bull, Joanna Watkins, Sally Corden, Tom Connor                                                                                                                                                                                                                                                                                                            |
| EPI_ISL_703232, EPI_ISL_703237, EPI_ISL_703239                 | Lighthouse Lab in Aderley Park                                                                                                                                                                  | Wellcome Sanger Institute for the COVID-19 Genomics UK (COG-UK) Consortium | Jacquelyn Wynn, Mairead Hyland, The Lighthouse Lab in Aderley Park and Alex Alderton, Roberto Amato, Sonia Goncalves, Ewan Harrison, David K. Jackson, Ian Johnston, Dominic Kwiatkowski, Cordelia Langford, John Sillito on behalf of the Wellcome Sanger Institute COVID-19 Surveillance Team                                                                                                                                                                                                                                                                                                                                                                                    |
| EPI_ISL_703240, EPI_ISL_703243                                 | West of Scotland Specialist Virology Centre, NHSGGC / MRC-University of Glasgow Centre for Virus Research                                                                                       | COVID-19 Genomics UK (COG-UK) Consortium                                   | Ana da Silva Filipe, Natasha Johnson, Kathy Snodlett, Daniel Mar, Stephen Carmichael, Alice Brooks, Lily Tong, Jenna Nichols, Kyriaki Nomioku, Sarah McDonald, Richard Otron, Joseph Hughes, Sreeni Vaidikpally, David L Robertson, Alasdair MacLean, Rory Gurnson, Sharif Shaaban, Matthew Holden, Rachel Blacow, Guy Mollath, Kathy L, James Shephard, Antonia Ho, Emma Thomson                                                                                                                                                                                                                                                                                                  |
| EPI_ISL_703245                                                 | Lighthouse Lab in Aderley Park                                                                                                                                                                  | Wellcome Sanger Institute for the COVID-19 Genomics UK (COG-UK) Consortium | Jacquelyn Wynn, Mairead Hyland, The Lighthouse Lab in Aderley Park and Alex Alderton, Roberto Amato, Sonia Goncalves, Ewan Harrison, David K. Jackson, Ian Johnston, Dominic Kwiatkowski, Cordelia Langford, John Sillito on behalf of the Wellcome Sanger Institute COVID-19 Surveillance Team                                                                                                                                                                                                                                                                                                                                                                                    |
| EPI_ISL_703246, EPI_ISL_703249                                 | West of Scotland Specialist Virology Centre, NHSGGC / MRC-University of Glasgow Centre for Virus Research                                                                                       | COVID-19 Genomics UK (COG-UK) Consortium                                   | Angela Beckett, Yann Bourgeois Garry Scarlett, Sharon Glaysher, Scott Elliott, Kelly Becknell, Robert Impoy, Alyson Lloyd, Sarah Wylie, Ethan Butcher, Anoop Chauhan, Samuel Hobson                                                                                                                                                                                                                                                                                                                                                                                                                                                                                                |
| EPI_ISL_703252, EPI_ISL_703253, EPI_ISL_703258, EPI_ISL_703260 | Lighthouse Lab in Aderley Park                                                                                                                                                                  | Wellcome Sanger Institute for the COVID-19 Genomics UK (COG-UK) Consortium | Jacquelyn Wynn, Mairead Hyland, The Lighthouse Lab in Aderley Park and Alex Alderton, Roberto Amato, Sonia Goncalves, Ewan Harrison, David K. Jackson, Ian Johnston, Dominic Kwiatkowski, Cordelia Langford, John Sillito on behalf of the Wellcome Sanger Institute COVID-19 Surveillance Team                                                                                                                                                                                                                                                                                                                                                                                    |
| EPI_ISL_703267                                                 | Centre for Enzyme Innovation, University of Portsmouth / Translational Research Laboratory, Portsmouth Hospitals NHS Trust                                                                      | COVID-19 Genomics UK (COG-UK) Consortium                                   | Harper VansSteerhouse, Yurni Kasai, David Gray, Carol Clugston, Anna Dominiczak and Alex Alderton, Roberto Amato, Sonia Goncalves, Ewan Harrison, David K. Jackson, Ian Johnston, Dominic Kwiatkowski, Cordelia Langford, John Sillito on behalf of the Wellcome Sanger Institute COVID-19 Surveillance Team                                                                                                                                                                                                                                                                                                                                                                       |
| EPI_ISL_703270, EPI_ISL_703273                                 | Lighthouse Lab in Glasgow                                                                                                                                                                       | Wellcome Sanger Institute for the COVID-19 Genomics UK (COG-UK) Consortium | Harper VansSteerhouse, Yurni Kasai, David Gray, Carol Clugston, Anna Dominiczak and Alex Alderton, Roberto Amato, Sonia Goncalves, Ewan Harrison, David K. Jackson, Ian Johnston, Dominic Kwiatkowski, Cordelia Langford, John Sillito on behalf of the Wellcome Sanger Institute COVID-19 Surveillance Team                                                                                                                                                                                                                                                                                                                                                                       |
| EPI_ISL_703282                                                 | Lighthouse Lab in Aderley Park                                                                                                                                                                  | Wellcome Sanger Institute for the COVID-19 Genomics UK (COG-UK) Consortium | Jacquelyn Wynn, Mairead Hyland, The Lighthouse Lab in Aderley Park and Alex Alderton, Roberto Amato, Sonia Goncalves, Ewan Harrison, David K. Jackson, Ian Johnston, Dominic Kwiatkowski, Cordelia Langford, John Sillito on behalf of the Wellcome Sanger Institute COVID-19 Surveillance Team                                                                                                                                                                                                                                                                                                                                                                                    |
| EPI_ISL_703283                                                 | Lighthouse Lab in Glasgow                                                                                                                                                                       | Wellcome Sanger Institute for the COVID-19 Genomics UK (COG-UK) Consortium | Harper VansSteerhouse, Yurni Kasai, David Gray, Carol Clugston, Anna Dominiczak and Alex Alderton, Roberto Amato, Sonia Goncalves, Ewan Harrison, David K. Jackson, Ian Johnston, Dominic Kwiatkowski, Cordelia Langford, John Sillito on behalf of the Wellcome Sanger Institute COVID-19 Surveillance Team                                                                                                                                                                                                                                                                                                                                                                       |
| EPI_ISL_703284                                                 | Liverpool Clinical Laboratories                                                                                                                                                                 | COVID-19 Genomics UK (COG-UK) Consortium                                   | Sam Hadenby, Anita Lucsd, Steve Paterson, Julian Hiscox, Alistair Darby, M Almsaudi, A Alzeizhi, Muhammad Alruwaili, Stuart D Armstrong, Jones Benjamin, Eleanor G Bentley, Anu Chawla, Jordan J Clark, Angela Cowell, Richard Eccles, Isabel Garcia-Donval, Matthew Gemmill, Alessandro Gerada, PKF Gilmore, Richard Gregory, Ximeng Han, Catherine Hartley, Margaret Hughes, Miran Ijurza-Gomara, James Johnson, L. Liu, Jennifer Manson, Charlotte Nelson, Elaine O'Toole, Cassie Orlady, Rebekah Penrice-Handel, Lucille Rahnov, N P Randle, Trevor Ian Robinson, Parul Sharma, Ghada T Shawil, James P Stewart, Neil Swainson, Eaterina Varnos, Joanna Waiats, Mark Whitehead |
| EPI_ISL_703290                                                 | Lighthouse Lab in Glasgow                                                                                                                                                                       | Wellcome Sanger Institute for the COVID-19 Genomics UK (COG-UK) Consortium | Harper VansSteerhouse, Yurni Kasai, David Gray, Carol Clugston, Anna Dominiczak and Alex Alderton, Roberto Amato, Sonia Goncalves, Ewan Harrison, David K. Jackson, Ian Johnston, Dominic Kwiatkowski, Cordelia Langford, John Sillito on behalf of the Wellcome Sanger Institute COVID-19 Surveillance Team                                                                                                                                                                                                                                                                                                                                                                       |
| EPI_ISL_703293                                                 | Lighthouse Lab in Aderley Park                                                                                                                                                                  | Wellcome Sanger Institute for the COVID-19 Genomics UK (COG-UK) Consortium | Jacquelyn Wynn, Mairead Hyland, The Lighthouse Lab in Aderley Park and Alex Alderton, Roberto Amato, Sonia Goncalves, Ewan Harrison, David K. Jackson, Ian Johnston, Dominic Kwiatkowski, Cordelia Langford, John Sillito on behalf of the Wellcome Sanger Institute COVID-19 Surveillance Team                                                                                                                                                                                                                                                                                                                                                                                    |
| EPI_ISL_703294                                                 | Lighthouse Lab in Aderley Park                                                                                                                                                                  | Wellcome Sanger Institute for the COVID-19 Genomics UK (COG-UK) Consortium | Harper VansSteerhouse, Yurni Kasai, David Gray, Carol Clugston, Anna Dominiczak and Alex Alderton, Roberto Amato, Sonia Goncalves, Ewan Harrison, David K. Jackson, Ian Johnston, Dominic Kwiatkowski, Cordelia Langford, John Sillito on behalf of the Wellcome Sanger Institute COVID-19 Surveillance Team                                                                                                                                                                                                                                                                                                                                                                       |
| EPI_ISL_703295                                                 | Quadram Institute Bioscience                                                                                                                                                                    | COVID-19 Genomics UK (COG-UK) Consortium                                   | Dave J Baker, Gemma L. Kay, Ab Aydin, Thanh Le-Viet, Steven Rudder, Ana P. Tedim, Anastasia Kolyva, Maria Diaz, Leonardo de Oliveira Martins, Nabih-areed Alhntar, Lizzie Meadows, Rachael Stanley, Nguz Elmurog, Muhammad Yasar, Nicholas M. Thomson, Alexander J Trotter, Rachel Gilroy, Samuel Bloomfield, Claire Stuart, Andrew Bell, Reenesh Prakash, Sami Dervisevic, Alison E. Maher, John Wain, Mark Webber, Andrew J. Page, Justin O'Grady                                                                                                                                                                                                                                |
| EPI_ISL_703296                                                 | Lighthouse Lab in Glasgow                                                                                                                                                                       | Wellcome Sanger Institute for the COVID-19 Genomics UK (COG-UK) Consortium | Harper VansSteerhouse, Yurni Kasai, David Gray, Carol Clugston, Anna Dominiczak and Alex Alderton, Roberto Amato, Sonia Goncalves, Ewan Harrison, David K. Jackson, Ian Johnston, Dominic Kwiatkowski, Cordelia Langford, John Sillito on behalf of the Wellcome Sanger Institute COVID-19 Surveillance Team                                                                                                                                                                                                                                                                                                                                                                       |
| EPI_ISL_703299                                                 | Wales Specialist Virology Centre Sequencing lab: Pathogen Genomics Unit                                                                                                                         | COVID-19 Genomics UK (COG-UK) Consortium                                   | Catherine Moore, Johnathan Evans, Laura Gifford, Malorie Parry, Simon Cortell, Angela Marchbank, Alec Birchley, Alexander Adams, Amy Gaslin, Bree Gatica-Wilcox, Jason Coombes, Joel Southgate, Lauren Gilbert, Lee Graham, Nicole Paschallani, Sara Kunziane-Summerhayes, Sarah Taylor, Sophie Jones, Sara Ray, Matthew Bull, Joanna Watkins, Sally Corden, Tom Connor                                                                                                                                                                                                                                                                                                            |

|                                                |                                                                         |                                                                            |                                                                                                                                                                                                                                                                                                                                                                                                                                                                                                                                                                                                                                                                                |
|------------------------------------------------|-------------------------------------------------------------------------|----------------------------------------------------------------------------|--------------------------------------------------------------------------------------------------------------------------------------------------------------------------------------------------------------------------------------------------------------------------------------------------------------------------------------------------------------------------------------------------------------------------------------------------------------------------------------------------------------------------------------------------------------------------------------------------------------------------------------------------------------------------------|
| EPI_ISL_703301                                 | Lighthouse Lab in Aderley Park                                          | Wellcome Sanger Institute for the COVID-19 Genomics UK (COG-UK) Consortium | Jacquelyn Wynn, Mairead Hyland, The Lighthouse Lab in Aderley Park and Alex Alderton, Roberto Amato, Sonia Goncalves, Ewan Harrison, David K. Jackson, Ian Johnston, Dominic Kwiatkowski, Cordelia Langford, John Sillito on behalf of the Wellcome Sanger Institute COVID-19 Surveillance Team                                                                                                                                                                                                                                                                                                                                                                                |
| EPI_ISL_703303                                 | Lighthouse Lab in Glasgow                                               | Wellcome Sanger Institute for the COVID-19 Genomics UK (COG-UK) Consortium | Harper VanSteerhouse, Yurni Kasai, David Gray, Carol Clugston, Anna Dominiczak and Alex Alderton, Roberto Amato, Sonia Goncalves, Ewan Harrison, David K. Jackson, Ian Johnston, Dominic Kwiatkowski, Cordelia Langford, John Sillito on behalf of the Wellcome Sanger Institute COVID-19 Surveillance Team                                                                                                                                                                                                                                                                                                                                                                    |
| EPI_ISL_703306, EPI_ISL_703307                 | Lighthouse Lab in Aderley Park                                          | Wellcome Sanger Institute for the COVID-19 Genomics UK (COG-UK) Consortium | Jacquelyn Wynn, Mairead Hyland, The Lighthouse Lab in Aderley Park and Alex Alderton, Roberto Amato, Sonia Goncalves, Ewan Harrison, David K. Jackson, Ian Johnston, Dominic Kwiatkowski, Cordelia Langford, John Sillito on behalf of the Wellcome Sanger Institute COVID-19 Surveillance Team                                                                                                                                                                                                                                                                                                                                                                                |
| EPI_ISL_703308, EPI_ISL_703310                 | Liverpool Clinical Laboratories                                         | COVID-19 Genomics UK (COG-UK) Consortium                                   | Sam Hadenby, Anita Luceai, Steve Paterson, Julian Hiscox, Alistair Darby, M Amsaud, A Alvezahi, Muhammad Atrurail, Stuart D Armstrong, Jones Benjamin, Eleanor G Bentley, Anu Chawla, Jordan J Clark, Angela Cowell, Richard Eccles, Isabel Garcia-Donval, Matthew Gemmill, Alessandro Gerada, PFR Gilmore, Richard Gregory, Ximeng Han, Catherine Hartley, Margaret Hughes, Miran Turzta-Gomara, James Johnson, L Liu, Jennifer Manson, Charlotte Nelson, Elaine O'Toole, Cassie Orlaigh, Rebekah Penrice-Handel, Lucile Rahnov, N P Randle, Trevor Ian Robinson, Parul Sharma, Ghada T Shawil, James P Stewart, Neil Swainson, Ecaterina Varnos, Joanne Wats, Mark Whitehead |
| EPI_ISL_703311, EPI_ISL_703312                 | Lighthouse Lab in Aderley Park                                          | Wellcome Sanger Institute for the COVID-19 Genomics UK (COG-UK) Consortium | Jacquelyn Wynn, Mairead Hyland, The Lighthouse Lab in Aderley Park and Alex Alderton, Roberto Amato, Sonia Goncalves, Ewan Harrison, David K. Jackson, Ian Johnston, Dominic Kwiatkowski, Cordelia Langford, John Sillito on behalf of the Wellcome Sanger Institute COVID-19 Surveillance Team                                                                                                                                                                                                                                                                                                                                                                                |
| EPI_ISL_703313                                 | Liverpool Clinical Laboratories                                         | COVID-19 Genomics UK (COG-UK) Consortium                                   | Sam Hadenby, Anita Luceai, Steve Paterson, Julian Hiscox, Alistair Darby, M Amsaud, A Alvezahi, Muhammad Atrurail, Stuart D Armstrong, Jones Benjamin, Eleanor G Bentley, Anu Chawla, Jordan J Clark, Angela Cowell, Richard Eccles, Isabel Garcia-Donval, Matthew Gemmill, Alessandro Gerada, PFR Gilmore, Richard Gregory, Ximeng Han, Catherine Hartley, Margaret Hughes, Miran Turzta-Gomara, James Johnson, L Liu, Jennifer Manson, Charlotte Nelson, Elaine O'Toole, Cassie Orlaigh, Rebekah Penrice-Handel, Lucile Rahnov, N P Randle, Trevor Ian Robinson, Parul Sharma, Ghada T Shawil, James P Stewart, Neil Swainson, Ecaterina Varnos, Joanne Wats, Mark Whitehead |
| EPI_ISL_703314                                 | Lighthouse Lab in Aderley Park                                          | Wellcome Sanger Institute for the COVID-19 Genomics UK (COG-UK) Consortium | Jacquelyn Wynn, Mairead Hyland, The Lighthouse Lab in Aderley Park and Alex Alderton, Roberto Amato, Sonia Goncalves, Ewan Harrison, David K. Jackson, Ian Johnston, Dominic Kwiatkowski, Cordelia Langford, John Sillito on behalf of the Wellcome Sanger Institute COVID-19 Surveillance Team                                                                                                                                                                                                                                                                                                                                                                                |
| EPI_ISL_703315                                 | Lighthouse Lab in Glasgow                                               | Wellcome Sanger Institute for the COVID-19 Genomics UK (COG-UK) Consortium | Harper VanSteerhouse, Yurni Kasai, David Gray, Carol Clugston, Anna Dominiczak and Alex Alderton, Roberto Amato, Sonia Goncalves, Ewan Harrison, David K. Jackson, Ian Johnston, Dominic Kwiatkowski, Cordelia Langford, John Sillito on behalf of the Wellcome Sanger Institute COVID-19 Surveillance Team                                                                                                                                                                                                                                                                                                                                                                    |
| EPI_ISL_703317, EPI_ISL_703318                 | Lighthouse Lab in Aderley Park                                          | Wellcome Sanger Institute for the COVID-19 Genomics UK (COG-UK) Consortium | Jacquelyn Wynn, Mairead Hyland, The Lighthouse Lab in Aderley Park and Alex Alderton, Roberto Amato, Sonia Goncalves, Ewan Harrison, David K. Jackson, Ian Johnston, Dominic Kwiatkowski, Cordelia Langford, John Sillito on behalf of the Wellcome Sanger Institute COVID-19 Surveillance Team                                                                                                                                                                                                                                                                                                                                                                                |
| EPI_ISL_703320                                 | Lighthouse Lab in Glasgow                                               | Wellcome Sanger Institute for the COVID-19 Genomics UK (COG-UK) Consortium | Harper VanSteerhouse, Yurni Kasai, David Gray, Carol Clugston, Anna Dominiczak and Alex Alderton, Roberto Amato, Sonia Goncalves, Ewan Harrison, David K. Jackson, Ian Johnston, Dominic Kwiatkowski, Cordelia Langford, John Sillito on behalf of the Wellcome Sanger Institute COVID-19 Surveillance Team                                                                                                                                                                                                                                                                                                                                                                    |
| EPI_ISL_703321                                 | Wales Specialist Virology Centre Sequencing lab: Pathogen Genomics Unit | COVID-19 Genomics UK (COG-UK) Consortium                                   | Catherine Moore, Johnathan Evans, Laura Gifford, Malone Perry, Simon Cottrell, Angela Marchbank, Alec Birchley, Alexander Adams, Amy Gaslin, Bree Gatica-Wilcox, Jason Coombes, Joel Scudgale, Lauren Gilbert, Lee Graham, Nicole Pacharaini, Sara Kunzrizen-Summerhayes, Sarah Taylor, Sophie Jones, Sara Hay, Matthew Bull, Joanne Watkins, Sally Corden, Tom Connor                                                                                                                                                                                                                                                                                                         |
| EPI_ISL_703322                                 | Lighthouse Lab in Aderley Park                                          | Wellcome Sanger Institute for the COVID-19 Genomics UK (COG-UK) Consortium | Jacquelyn Wynn, Mairead Hyland, The Lighthouse Lab in Aderley Park and Alex Alderton, Roberto Amato, Sonia Goncalves, Ewan Harrison, David K. Jackson, Ian Johnston, Dominic Kwiatkowski, Cordelia Langford, John Sillito on behalf of the Wellcome Sanger Institute COVID-19 Surveillance Team                                                                                                                                                                                                                                                                                                                                                                                |
| EPI_ISL_703323                                 | Lighthouse Lab in Glasgow                                               | Wellcome Sanger Institute for the COVID-19 Genomics UK (COG-UK) Consortium | Harper VanSteerhouse, Yurni Kasai, David Gray, Carol Clugston, Anna Dominiczak and Alex Alderton, Roberto Amato, Sonia Goncalves, Ewan Harrison, David K. Jackson, Ian Johnston, Dominic Kwiatkowski, Cordelia Langford, John Sillito on behalf of the Wellcome Sanger Institute COVID-19 Surveillance Team                                                                                                                                                                                                                                                                                                                                                                    |
| EPI_ISL_703324                                 | Liverpool Clinical Laboratories                                         | COVID-19 Genomics UK (COG-UK) Consortium                                   | Sam Hadenby, Anita Luceai, Steve Paterson, Julian Hiscox, Alistair Darby, M Amsaud, A Alvezahi, Muhammad Atrurail, Stuart D Armstrong, Jones Benjamin, Eleanor G Bentley, Anu Chawla, Jordan J Clark, Angela Cowell, Richard Eccles, Isabel Garcia-Donval, Matthew Gemmill, Alessandro Gerada, PFR Gilmore, Richard Gregory, Ximeng Han, Catherine Hartley, Margaret Hughes, Miran Turzta-Gomara, James Johnson, L Liu, Jennifer Manson, Charlotte Nelson, Elaine O'Toole, Cassie Orlaigh, Rebekah Penrice-Handel, Lucile Rahnov, N P Randle, Trevor Ian Robinson, Parul Sharma, Ghada T Shawil, James P Stewart, Neil Swainson, Ecaterina Varnos, Joanne Wats, Mark Whitehead |
| EPI_ISL_703325                                 | Lighthouse Lab in Glasgow                                               | Wellcome Sanger Institute for the COVID-19 Genomics UK (COG-UK) Consortium | Harper VanSteerhouse, Yurni Kasai, David Gray, Carol Clugston, Anna Dominiczak and Alex Alderton, Roberto Amato, Sonia Goncalves, Ewan Harrison, David K. Jackson, Ian Johnston, Dominic Kwiatkowski, Cordelia Langford, John Sillito on behalf of the Wellcome Sanger Institute COVID-19 Surveillance Team                                                                                                                                                                                                                                                                                                                                                                    |
| EPI_ISL_703326, EPI_ISL_703329                 | Lighthouse Lab in Aderley Park                                          | Wellcome Sanger Institute for the COVID-19 Genomics UK (COG-UK) Consortium | Jacquelyn Wynn, Mairead Hyland, The Lighthouse Lab in Aderley Park and Alex Alderton, Roberto Amato, Sonia Goncalves, Ewan Harrison, David K. Jackson, Ian Johnston, Dominic Kwiatkowski, Cordelia Langford, John Sillito on behalf of the Wellcome Sanger Institute COVID-19 Surveillance Team                                                                                                                                                                                                                                                                                                                                                                                |
| EPI_ISL_703331, EPI_ISL_703334                 | Lighthouse Lab in Glasgow                                               | Wellcome Sanger Institute for the COVID-19 Genomics UK (COG-UK) Consortium | Harper VanSteerhouse, Yurni Kasai, David Gray, Carol Clugston, Anna Dominiczak and Alex Alderton, Roberto Amato, Sonia Goncalves, Ewan Harrison, David K. Jackson, Ian Johnston, Dominic Kwiatkowski, Cordelia Langford, John Sillito on behalf of the Wellcome Sanger Institute COVID-19 Surveillance Team                                                                                                                                                                                                                                                                                                                                                                    |
| EPI_ISL_703336                                 | Lighthouse Lab in Aderley Park                                          | Wellcome Sanger Institute for the COVID-19 Genomics UK (COG-UK) Consortium | Jacquelyn Wynn, Mairead Hyland, The Lighthouse Lab in Aderley Park and Alex Alderton, Roberto Amato, Sonia Goncalves, Ewan Harrison, David K. Jackson, Ian Johnston, Dominic Kwiatkowski, Cordelia Langford, John Sillito on behalf of the Wellcome Sanger Institute COVID-19 Surveillance Team                                                                                                                                                                                                                                                                                                                                                                                |
| EPI_ISL_703337                                 | Lighthouse Lab in Glasgow                                               | Wellcome Sanger Institute for the COVID-19 Genomics UK (COG-UK) Consortium | Harper VanSteerhouse, Yurni Kasai, David Gray, Carol Clugston, Anna Dominiczak and Alex Alderton, Roberto Amato, Sonia Goncalves, Ewan Harrison, David K. Jackson, Ian Johnston, Dominic Kwiatkowski, Cordelia Langford, John Sillito on behalf of the Wellcome Sanger Institute COVID-19 Surveillance Team                                                                                                                                                                                                                                                                                                                                                                    |
| EPI_ISL_703342                                 | Lighthouse Lab in Aderley Park                                          | Wellcome Sanger Institute for the COVID-19 Genomics UK (COG-UK) Consortium | Jacquelyn Wynn, Mairead Hyland, The Lighthouse Lab in Aderley Park and Alex Alderton, Roberto Amato, Sonia Goncalves, Ewan Harrison, David K. Jackson, Ian Johnston, Dominic Kwiatkowski, Cordelia Langford, John Sillito on behalf of the Wellcome Sanger Institute COVID-19 Surveillance Team                                                                                                                                                                                                                                                                                                                                                                                |
| EPI_ISL_703346                                 | Wales Specialist Virology Centre Sequencing lab: Pathogen Genomics Unit | COVID-19 Genomics UK (COG-UK) Consortium                                   | Catherine Moore, Johnathan Evans, Laura Gifford, Malone Perry, Simon Cottrell, Angela Marchbank, Alec Birchley, Alexander Adams, Amy Gaslin, Bree Gatica-Wilcox, Jason Coombes, Joel Scudgale, Lauren Gilbert, Lee Graham, Nicole Pacharaini, Sara Kunzrizen-Summerhayes, Sarah Taylor, Sophie Jones, Sara Hay, Matthew Bull, Joanne Watkins, Sally Corden, Tom Connor                                                                                                                                                                                                                                                                                                         |
| EPI_ISL_703347                                 | Lighthouse Lab in Aderley Park                                          | Wellcome Sanger Institute for the COVID-19 Genomics UK (COG-UK) Consortium | Jacquelyn Wynn, Mairead Hyland, The Lighthouse Lab in Aderley Park and Alex Alderton, Roberto Amato, Sonia Goncalves, Ewan Harrison, David K. Jackson, Ian Johnston, Dominic Kwiatkowski, Cordelia Langford, John Sillito on behalf of the Wellcome Sanger Institute COVID-19 Surveillance Team                                                                                                                                                                                                                                                                                                                                                                                |
| EPI_ISL_703348                                 | Liverpool Clinical Laboratories                                         | COVID-19 Genomics UK (COG-UK) Consortium                                   | Sam Hadenby, Anita Luceai, Steve Paterson, Julian Hiscox, Alistair Darby, M Amsaud, A Alvezahi, Muhammad Atrurail, Stuart D Armstrong, Jones Benjamin, Eleanor G Bentley, Anu Chawla, Jordan J Clark, Angela Cowell, Richard Eccles, Isabel Garcia-Donval, Matthew Gemmill, Alessandro Gerada, PFR Gilmore, Richard Gregory, Ximeng Han, Catherine Hartley, Margaret Hughes, Miran Turzta-Gomara, James Johnson, L Liu, Jennifer Manson, Charlotte Nelson, Elaine O'Toole, Cassie Orlaigh, Rebekah Penrice-Handel, Lucile Rahnov, N P Randle, Trevor Ian Robinson, Parul Sharma, Ghada T Shawil, James P Stewart, Neil Swainson, Ecaterina Varnos, Joanne Wats, Mark Whitehead |
| EPI_ISL_703350, EPI_ISL_703354, EPI_ISL_703355 | Lighthouse Lab in Glasgow                                               | Wellcome Sanger Institute for the COVID-19 Genomics UK (COG-UK) Consortium | Harper VanSteerhouse, Yurni Kasai, David Gray, Carol Clugston, Anna Dominiczak and Alex Alderton, Roberto Amato, Sonia Goncalves, Ewan Harrison, David K. Jackson, Ian Johnston, Dominic Kwiatkowski, Cordelia Langford, John Sillito on behalf of the Wellcome Sanger Institute COVID-19 Surveillance Team                                                                                                                                                                                                                                                                                                                                                                    |
| EPI_ISL_703357                                 | Lighthouse Lab in Aderley Park                                          | Wellcome Sanger Institute for the COVID-19 Genomics UK (COG-UK) Consortium | Jacquelyn Wynn, Mairead Hyland, The Lighthouse Lab in Aderley Park and Alex Alderton, Roberto Amato, Sonia Goncalves, Ewan Harrison, David K. Jackson, Ian Johnston, Dominic Kwiatkowski, Cordelia Langford, John Sillito on behalf of the Wellcome Sanger Institute COVID-19 Surveillance Team                                                                                                                                                                                                                                                                                                                                                                                |
| EPI_ISL_703359                                 | Wales Specialist Virology Centre Sequencing lab: Pathogen Genomics Unit | COVID-19 Genomics UK (COG-UK) Consortium                                   | Catherine Moore, Johnathan Evans, Laura Gifford, Malone Perry, Simon Cottrell, Angela Marchbank, Alec Birchley, Alexander Adams, Amy Gaslin, Bree Gatica-Wilcox, Jason Coombes, Joel Scudgale, Lauren Gilbert, Lee Graham, Nicole Pacharaini, Sara Kunzrizen-Summerhayes, Sarah Taylor, Sophie Jones, Sara Hay, Matthew Bull, Joanne Watkins, Sally Corden, Tom Connor                                                                                                                                                                                                                                                                                                         |



|                                |                                                                                                                                                                                                 |                                                                            |                                                                                                                                                                                                                                                                                                                                                                                                                                                                                                                                                                                                                                                                   |
|--------------------------------|-------------------------------------------------------------------------------------------------------------------------------------------------------------------------------------------------|----------------------------------------------------------------------------|-------------------------------------------------------------------------------------------------------------------------------------------------------------------------------------------------------------------------------------------------------------------------------------------------------------------------------------------------------------------------------------------------------------------------------------------------------------------------------------------------------------------------------------------------------------------------------------------------------------------------------------------------------------------|
| EPI_ISL_703361                 | Liverpool Clinical Laboratories                                                                                                                                                                 | COVID-19 Genomics UK (COG-UK) Consortium                                   | Sam Hadenby, Anila Lucea, Steve Paterson, Julian Hiscox, Alistair Darcy, M Almsaud, A Altezahli, Muhammad Alruwail, Stuart D Armstrong, Jones Benjamin, Eleanor G Bentley, Anu Chawla, Jordan J Clark, Angela Eccles, Isabel Garcia-Donval, Matthew Gemmill, Alessandro Gerada, PKF Gilmore, Richard Gregory, Ximeng Han, Catherine Hartley, Margaret Hughes, Miran Ijurza-Gomara, James Johnson, L Liu, Jennifer Manson, Charlotte Nelson, Elaine O'Toole, Cassie Orlaolu, Rebekah Penrice-Handel, Lucille Rahnbow, NP Randle, Trevor Ian Robinson, Parul Sharma, Ghada T Shawli, James P Stewart, Neil Swainson, Ecaterina Varnos, Joanne Waihs, Mark Whitehead |
| EPI_ISL_703362                 | Lighthouse Lab in Glasgow                                                                                                                                                                       | Wellcome Sanger Institute for the COVID-19 Genomics UK (COG-UK) Consortium | Happer VansSteerhouse, Yurni Kasasi, David Gray, Carol Clugston, Anna Dominiczak and Alex Alderton, Roberto Arango, Sonia Goncalves, Ewan Harrison, David K, Jackson, Ian Johnston, Dominic Kwiatkowski, Cordelia Langford, John Sillito on behalf of the Wellcome Sanger Institute COVID-19 Surveillance Team                                                                                                                                                                                                                                                                                                                                                    |
| EPI_ISL_703367, EPI_ISL_703372 | Liverpool Clinical Laboratories                                                                                                                                                                 | COVID-19 Genomics UK (COG-UK) Consortium                                   | Sam Hadenby, Anila Lucea, Steve Paterson, Julian Hiscox, Alistair Darcy, M Almsaud, A Altezahli, Muhammad Alruwail, Stuart D Armstrong, Jones Benjamin, Eleanor G Bentley, Anu Chawla, Jordan J Clark, Angela Eccles, Isabel Garcia-Donval, Matthew Gemmill, Alessandro Gerada, PKF Gilmore, Richard Gregory, Ximeng Han, Catherine Hartley, Margaret Hughes, Miran Ijurza-Gomara, James Johnson, L Liu, Jennifer Manson, Charlotte Nelson, Elaine O'Toole, Cassie Orlaolu, Rebekah Penrice-Handel, Lucille Rahnbow, NP Randle, Trevor Ian Robinson, Parul Sharma, Ghada T Shawli, James P Stewart, Neil Swainson, Ecaterina Varnos, Joanne Waihs, Mark Whitehead |
| EPI_ISL_703373, EPI_ISL_703374 | Lighthouse Lab in Aderley Park                                                                                                                                                                  | Wellcome Sanger Institute for the COVID-19 Genomics UK (COG-UK) Consortium | Jacquelyn Wynn, Mairead Hyland, The Lighthouse Lab in Aderley Park and Alex Alderton, Roberto Arango, Sonia Goncalves, Ewan Harrison, David K, Jackson, Ian Johnston, Dominic Kwiatkowski, Cordelia Langford, John Sillito on behalf of the Wellcome Sanger Institute COVID-19 Surveillance Team                                                                                                                                                                                                                                                                                                                                                                  |
| EPI_ISL_703375, EPI_ISL_703380 | Liverpool Clinical Laboratories                                                                                                                                                                 | COVID-19 Genomics UK (COG-UK) Consortium                                   | Sam Hadenby, Anila Lucea, Steve Paterson, Julian Hiscox, Alistair Darcy, M Almsaud, A Altezahli, Muhammad Alruwail, Stuart D Armstrong, Jones Benjamin, Eleanor G Bentley, Anu Chawla, Jordan J Clark, Angela Eccles, Isabel Garcia-Donval, Matthew Gemmill, Alessandro Gerada, PKF Gilmore, Richard Gregory, Ximeng Han, Catherine Hartley, Margaret Hughes, Miran Ijurza-Gomara, James Johnson, L Liu, Jennifer Manson, Charlotte Nelson, Elaine O'Toole, Cassie Orlaolu, Rebekah Penrice-Handel, Lucille Rahnbow, NP Randle, Trevor Ian Robinson, Parul Sharma, Ghada T Shawli, James P Stewart, Neil Swainson, Ecaterina Varnos, Joanne Waihs, Mark Whitehead |
| EPI_ISL_703381                 | Lighthouse Lab in Glasgow                                                                                                                                                                       | Wellcome Sanger Institute for the COVID-19 Genomics UK (COG-UK) Consortium | Happer VansSteerhouse, Yurni Kasasi, David Gray, Carol Clugston, Anna Dominiczak and Alex Alderton, Roberto Arango, Sonia Goncalves, Ewan Harrison, David K, Jackson, Ian Johnston, Dominic Kwiatkowski, Cordelia Langford, John Sillito on behalf of the Wellcome Sanger Institute COVID-19 Surveillance Team                                                                                                                                                                                                                                                                                                                                                    |
| EPI_ISL_703386                 | Lighthouse Lab in Aderley Park                                                                                                                                                                  | Wellcome Sanger Institute for the COVID-19 Genomics UK (COG-UK) Consortium | Jacquelyn Wynn, Mairead Hyland, The Lighthouse Lab in Aderley Park and Alex Alderton, Roberto Arango, Sonia Goncalves, Ewan Harrison, David K, Jackson, Ian Johnston, Dominic Kwiatkowski, Cordelia Langford, John Sillito on behalf of the Wellcome Sanger Institute COVID-19 Surveillance Team                                                                                                                                                                                                                                                                                                                                                                  |
| EPI_ISL_703387                 | Liverpool Clinical Laboratories                                                                                                                                                                 | COVID-19 Genomics UK (COG-UK) Consortium                                   | Sam Hadenby, Anila Lucea, Steve Paterson, Julian Hiscox, Alistair Darcy, M Almsaud, A Altezahli, Muhammad Alruwail, Stuart D Armstrong, Jones Benjamin, Eleanor G Bentley, Anu Chawla, Jordan J Clark, Angela Eccles, Isabel Garcia-Donval, Matthew Gemmill, Alessandro Gerada, PKF Gilmore, Richard Gregory, Ximeng Han, Catherine Hartley, Margaret Hughes, Miran Ijurza-Gomara, James Johnson, L Liu, Jennifer Manson, Charlotte Nelson, Elaine O'Toole, Cassie Orlaolu, Rebekah Penrice-Handel, Lucille Rahnbow, NP Randle, Trevor Ian Robinson, Parul Sharma, Ghada T Shawli, James P Stewart, Neil Swainson, Ecaterina Varnos, Joanne Waihs, Mark Whitehead |
| EPI_ISL_703395                 | Wales Specialist Virology Centre Sequencing lab: Pathogen Genomics Unit                                                                                                                         | COVID-19 Genomics UK (COG-UK) Consortium                                   | Catherine Moore, Johnathan Evans, Laura Gilford, Malorie Parry, Simon Cottrell, Angela Marchbank, Alec Birtchley, Alexander Adams, Amy Gaskin, Bree Gatica-Wilcox, Joel Soutfing, Lauren Gilbert, Lee Graham, Nicole Pachlirani, Sara Kunzlenen-Sumnerhayes, Sarah Taylor, Sophie Jones, Sara Ray, Matthew Bui, Joanne Watkins, Sally Cordeu, Tom Connor                                                                                                                                                                                                                                                                                                          |
| EPI_ISL_703396, EPI_ISL_703397 | Lighthouse Lab in Aderley Park                                                                                                                                                                  | Wellcome Sanger Institute for the COVID-19 Genomics UK (COG-UK) Consortium | Jacquelyn Wynn, Mairead Hyland, The Lighthouse Lab in Aderley Park and Alex Alderton, Roberto Arango, Sonia Goncalves, Ewan Harrison, David K, Jackson, Ian Johnston, Dominic Kwiatkowski, Cordelia Langford, John Sillito on behalf of the Wellcome Sanger Institute COVID-19 Surveillance Team                                                                                                                                                                                                                                                                                                                                                                  |
| EPI_ISL_703400                 | Virology Department, Sheffield Teaching Hospitals NHS Foundation Trust/Department of Infection, Immunity and Cardiovascular Disease, The Medical School, University of Sheffield                | COVID-19 Genomics UK (COG-UK) Consortium                                   | Thushan de Silva, Matthew Parker, Nikki Smith, Adri Anguel, Rebecca Brown, Luke Green, Rachel Tucker, Paul Parsons, Danielle Groves, Katie Johnson, Laura Carrtero, Alex Kealey, Dave Partridge, Matthew Wyles, Benjamin Linden, Mehmet Yavuz, Mohammad Raza, Parul Sharma, Ghada T Shawli, James P Stewart, Neil Swainson, Ecaterina Varnos, Joanne Waihs, Mark Whitehead                                                                                                                                                                                                                                                                                        |
| EPI_ISL_703407, EPI_ISL_703408 | Lighthouse Lab in Glasgow                                                                                                                                                                       | Wellcome Sanger Institute for the COVID-19 Genomics UK (COG-UK) Consortium | Happer VansSteerhouse, Yurni Kasasi, David Gray, Carol Clugston, Anna Dominiczak and Alex Alderton, Roberto Arango, Sonia Goncalves, Ewan Harrison, David K, Jackson, Ian Johnston, Dominic Kwiatkowski, Cordelia Langford, John Sillito on behalf of the Wellcome Sanger Institute COVID-19 Surveillance Team                                                                                                                                                                                                                                                                                                                                                    |
| EPI_ISL_703409                 | Liverpool Clinical Laboratories                                                                                                                                                                 | COVID-19 Genomics UK (COG-UK) Consortium                                   | Sam Hadenby, Anila Lucea, Steve Paterson, Julian Hiscox, Alistair Darcy, M Almsaud, A Altezahli, Muhammad Alruwail, Stuart D Armstrong, Jones Benjamin, Eleanor G Bentley, Anu Chawla, Jordan J Clark, Angela Eccles, Isabel Garcia-Donval, Matthew Gemmill, Alessandro Gerada, PKF Gilmore, Richard Gregory, Ximeng Han, Catherine Hartley, Margaret Hughes, Miran Ijurza-Gomara, James Johnson, L Liu, Jennifer Manson, Charlotte Nelson, Elaine O'Toole, Cassie Orlaolu, Rebekah Penrice-Handel, Lucille Rahnbow, NP Randle, Trevor Ian Robinson, Parul Sharma, Ghada T Shawli, James P Stewart, Neil Swainson, Ecaterina Varnos, Joanne Waihs, Mark Whitehead |
| EPI_ISL_703410, EPI_ISL_703411 | Lighthouse Lab in Glasgow                                                                                                                                                                       | Wellcome Sanger Institute for the COVID-19 Genomics UK (COG-UK) Consortium | Happer VansSteerhouse, Yurni Kasasi, David Gray, Carol Clugston, Anna Dominiczak and Alex Alderton, Roberto Arango, Sonia Goncalves, Ewan Harrison, David K, Jackson, Ian Johnston, Dominic Kwiatkowski, Cordelia Langford, John Sillito on behalf of the Wellcome Sanger Institute COVID-19 Surveillance Team                                                                                                                                                                                                                                                                                                                                                    |
| EPI_ISL_703413                 | Lighthouse Lab in Aderley Park                                                                                                                                                                  | Wellcome Sanger Institute for the COVID-19 Genomics UK (COG-UK) Consortium | Jacquelyn Wynn, Mairead Hyland, The Lighthouse Lab in Aderley Park and Alex Alderton, Roberto Arango, Sonia Goncalves, Ewan Harrison, David K, Jackson, Ian Johnston, Dominic Kwiatkowski, Cordelia Langford, John Sillito on behalf of the Wellcome Sanger Institute COVID-19 Surveillance Team                                                                                                                                                                                                                                                                                                                                                                  |
| EPI_ISL_703414                 | Virology Department, Royal Infirmary of Edinburgh, NHS Lothian / School of Biological Sciences, University of Edinburgh / Institute of Genetics and Molecular Medicine, University of Edinburgh | COVID-19 Genomics UK (COG-UK) Consortium                                   | McHugh M, Dewar R, Rooke S, Gallagher M, Balcaza C, O'Toole A, Scher E, Hill V, McCrone JT, Colquhoun R, Yu X, Jackson B, Rambaut A, Williams TC, Templeton K                                                                                                                                                                                                                                                                                                                                                                                                                                                                                                     |
| EPI_ISL_703415                 | Lighthouse Lab in Glasgow                                                                                                                                                                       | Wellcome Sanger Institute for the COVID-19 Genomics UK (COG-UK) Consortium | Happer VansSteerhouse, Yurni Kasasi, David Gray, Carol Clugston, Anna Dominiczak and Alex Alderton, Roberto Arango, Sonia Goncalves, Ewan Harrison, David K, Jackson, Ian Johnston, Dominic Kwiatkowski, Cordelia Langford, John Sillito on behalf of the Wellcome Sanger Institute COVID-19 Surveillance Team                                                                                                                                                                                                                                                                                                                                                    |
| EPI_ISL_703416                 | Lighthouse Lab in Aderley Park                                                                                                                                                                  | Wellcome Sanger Institute for the COVID-19 Genomics UK (COG-UK) Consortium | Jacquelyn Wynn, Mairead Hyland, The Lighthouse Lab in Aderley Park and Alex Alderton, Roberto Arango, Sonia Goncalves, Ewan Harrison, David K, Jackson, Ian Johnston, Dominic Kwiatkowski, Cordelia Langford, John Sillito on behalf of the Wellcome Sanger Institute COVID-19 Surveillance Team                                                                                                                                                                                                                                                                                                                                                                  |
| EPI_ISL_703417                 | Liverpool Clinical Laboratories                                                                                                                                                                 | COVID-19 Genomics UK (COG-UK) Consortium                                   | Sam Hadenby, Anila Lucea, Steve Paterson, Julian Hiscox, Alistair Darcy, M Almsaud, A Altezahli, Muhammad Alruwail, Stuart D Armstrong, Jones Benjamin, Eleanor G Bentley, Anu Chawla, Jordan J Clark, Angela Eccles, Isabel Garcia-Donval, Matthew Gemmill, Alessandro Gerada, PKF Gilmore, Richard Gregory, Ximeng Han, Catherine Hartley, Margaret Hughes, Miran Ijurza-Gomara, James Johnson, L Liu, Jennifer Manson, Charlotte Nelson, Elaine O'Toole, Cassie Orlaolu, Rebekah Penrice-Handel, Lucille Rahnbow, NP Randle, Trevor Ian Robinson, Parul Sharma, Ghada T Shawli, James P Stewart, Neil Swainson, Ecaterina Varnos, Joanne Waihs, Mark Whitehead |
| EPI_ISL_703418                 | Lighthouse Lab in Aderley Park                                                                                                                                                                  | Wellcome Sanger Institute for the COVID-19 Genomics UK (COG-UK) Consortium | Jacquelyn Wynn, Mairead Hyland, The Lighthouse Lab in Aderley Park and Alex Alderton, Roberto Arango, Sonia Goncalves, Ewan Harrison, David K, Jackson, Ian Johnston, Dominic Kwiatkowski, Cordelia Langford, John Sillito on behalf of the Wellcome Sanger Institute COVID-19 Surveillance Team                                                                                                                                                                                                                                                                                                                                                                  |
| EPI_ISL_703421                 | Liverpool Clinical Laboratories                                                                                                                                                                 | COVID-19 Genomics UK (COG-UK) Consortium                                   | Sam Hadenby, Anila Lucea, Steve Paterson, Julian Hiscox, Alistair Darcy, M Almsaud, A Altezahli, Muhammad Alruwail, Stuart D Armstrong, Jones Benjamin, Eleanor G Bentley, Anu Chawla, Jordan J Clark, Angela Eccles, Isabel Garcia-Donval, Matthew Gemmill, Alessandro Gerada, PKF Gilmore, Richard Gregory, Ximeng Han, Catherine Hartley, Margaret Hughes, Miran Ijurza-Gomara, James Johnson, L Liu, Jennifer Manson, Charlotte Nelson, Elaine O'Toole, Cassie Orlaolu, Rebekah Penrice-Handel, Lucille Rahnbow, NP Randle, Trevor Ian Robinson, Parul Sharma, Ghada T Shawli, James P Stewart, Neil Swainson, Ecaterina Varnos, Joanne Waihs, Mark Whitehead |
| EPI_ISL_703422                 | Lighthouse Lab in Glasgow                                                                                                                                                                       | Wellcome Sanger Institute for the COVID-19 Genomics UK (COG-UK) Consortium | Happer VansSteerhouse, Yurni Kasasi, David Gray, Carol Clugston, Anna Dominiczak and Alex Alderton, Roberto Arango, Sonia Goncalves, Ewan Harrison, David K, Jackson, Ian Johnston, Dominic Kwiatkowski, Cordelia Langford, John Sillito on behalf of the Wellcome Sanger Institute COVID-19 Surveillance Team                                                                                                                                                                                                                                                                                                                                                    |

|                                             |                                                                                                                                                                                    |                                                                            |                                                                                                                                                                                                                                                                                                                                                                                                                                                                                                                                                                                                                                                                              |
|---------------------------------------------|------------------------------------------------------------------------------------------------------------------------------------------------------------------------------------|----------------------------------------------------------------------------|------------------------------------------------------------------------------------------------------------------------------------------------------------------------------------------------------------------------------------------------------------------------------------------------------------------------------------------------------------------------------------------------------------------------------------------------------------------------------------------------------------------------------------------------------------------------------------------------------------------------------------------------------------------------------|
| EPI_SL_703425                               | Lighthouse Lab in Aderley Park                                                                                                                                                     | Wellcome Sanger Institute for the COVID-19 Genomics UK (COG-UK) Consortium | Jacquelyn Wynn, Mairead Hyland, The Lighthouse Lab in Aderley Park and Alex Alderton, Roberto Amato, Sonia Goncalves, Ewan Harrison, David K. Jackson, Ian Johnston, Dominic Kwiatkowski, Cordelia Langford, John Sillito on behalf of the Wellcome Sanger Institute COVID-19 Surveillance Team                                                                                                                                                                                                                                                                                                                                                                              |
| EPI_SL_703428                               | Lighthouse Lab in Glasgow                                                                                                                                                          | Wellcome Sanger Institute for the COVID-19 Genomics UK (COG-UK) Consortium | Happer VanSteerhouse, Yurni Kasai, David Gray, Carol Clugston, Anna Dominiczak and Alex Alderton, Roberto Amato, Sonia Goncalves, Ewan Harrison, David K. Jackson, Ian Johnston, Dominic Kwiatkowski, Cordelia Langford, John Sillito on behalf of the Wellcome Sanger Institute COVID-19 Surveillance Team                                                                                                                                                                                                                                                                                                                                                                  |
| EPI_SL_703430                               | West of Scotland Specialist Virology Centre, NHSGSC / MRC-University of Glasgow Centre for Virus Research                                                                          | COVID-19 Genomics UK (COG-UK) Consortium                                   | Ana da Silva Filipe, Natasha Johnson, Kathy Smollett, Daniel Mair, Stephen Carmichael, Alice Boos, Lily Tong, Jenna Nichols, Kyriaki Nomikou, Sarah McDonald, Richard Orton, Joseph Hughes, Sreenu Vaidikali, David L Robertson, Alasdair MacLennan, Rory Gunson, Sharif Shaaban, Matthew Holden, Rachel Biscoe, Guy Mollati, Kathy U, James Sheppard, Antonia Ho, Emma Thomson                                                                                                                                                                                                                                                                                              |
| EPI_SL_703432                               | Department of Pathology, University of Cambridge                                                                                                                                   | COVID-19 Genomics UK (COG-UK) Consortium                                   | Aminu S. Jahun, Yasmin Chaudhry, Grant Hall, Iliana Georgiana, Myra Hosmilo, Martin D. Curran, Maile Plockert, Surendra Parmar, Ian Goodfellow                                                                                                                                                                                                                                                                                                                                                                                                                                                                                                                               |
| EPI_SL_703436                               | Lighthouse Lab in Aderley Park                                                                                                                                                     | Wellcome Sanger Institute for the COVID-19 Genomics UK (COG-UK) Consortium | Jacquelyn Wynn, Mairead Hyland, The Lighthouse Lab in Aderley Park and Alex Alderton, Roberto Amato, Sonia Goncalves, Ewan Harrison, David K. Jackson, Ian Johnston, Dominic Kwiatkowski, Cordelia Langford, John Sillito on behalf of the Wellcome Sanger Institute COVID-19 Surveillance Team                                                                                                                                                                                                                                                                                                                                                                              |
| EPI_SL_703440                               | Department of Pathology, University of Cambridge                                                                                                                                   | COVID-19 Genomics UK (COG-UK) Consortium                                   | Aminu S. Jahun, Yasmin Chaudhry, Grant Hall, Iliana Georgiana, Myra Hosmilo, Martin D. Curran, Maile Plockert, Surendra Parmar, Ian Goodfellow                                                                                                                                                                                                                                                                                                                                                                                                                                                                                                                               |
| EPI_SL_703441                               | Lighthouse Lab in Aderley Park                                                                                                                                                     | Wellcome Sanger Institute for the COVID-19 Genomics UK (COG-UK) Consortium | Jacquelyn Wynn, Mairead Hyland, The Lighthouse Lab in Aderley Park and Alex Alderton, Roberto Amato, Sonia Goncalves, Ewan Harrison, David K. Jackson, Ian Johnston, Dominic Kwiatkowski, Cordelia Langford, John Sillito on behalf of the Wellcome Sanger Institute COVID-19 Surveillance Team                                                                                                                                                                                                                                                                                                                                                                              |
| EPI_SL_703442                               | Lighthouse Lab in Glasgow                                                                                                                                                          | Wellcome Sanger Institute for the COVID-19 Genomics UK (COG-UK) Consortium | Happer VanSteerhouse, Yurni Kasai, David Gray, Carol Clugston, Anna Dominiczak and Alex Alderton, Roberto Amato, Sonia Goncalves, Ewan Harrison, David K. Jackson, Ian Johnston, Dominic Kwiatkowski, Cordelia Langford, John Sillito on behalf of the Wellcome Sanger Institute COVID-19 Surveillance Team                                                                                                                                                                                                                                                                                                                                                                  |
| EPI_SL_703443                               | Wales Specialist Virology Centre Sequencing lab: Pathogen Genomics Unit                                                                                                            | COVID-19 Genomics UK (COG-UK) Consortium                                   | Catherine Moore, Johnathan Evans, Laura Gifford, Madeline Perry, Simon Cottrell, Angela Marchbank, Alec Birchley, Alexander Adams, Amy Gaslin, Bree Garcia-Wilcox, Jason Coombes, Joel Scudungale, Lauren Gilbert, Lee Graham, Nicole Pechanini, Sara Kuruzems-Sumnerhayes, Sarah Taylor, Sophie Jones, Sara Hay, Matthew Burt, Joanne Watkins, Sally Corbett, Tom Curran                                                                                                                                                                                                                                                                                                    |
| EPI_SL_703444, EPI_SL_703447                | Lighthouse Lab in Glasgow                                                                                                                                                          | Wellcome Sanger Institute for the COVID-19 Genomics UK (COG-UK) Consortium | Happer VanSteerhouse, Yurni Kasai, David Gray, Carol Clugston, Anna Dominiczak and Alex Alderton, Roberto Amato, Sonia Goncalves, Ewan Harrison, David K. Jackson, Ian Johnston, Dominic Kwiatkowski, Cordelia Langford, John Sillito on behalf of the Wellcome Sanger Institute COVID-19 Surveillance Team                                                                                                                                                                                                                                                                                                                                                                  |
| EPI_SL_703449                               | Virology Department, Sheffield Teaching Hospitals NHS Foundation Trust/Department of Infection, Immunology and Cardiovascular Disease, The Medical School, University of Sheffield | COVID-19 Genomics UK (COG-UK) Consortium                                   | Thushan de Silva, Matthew Parker, Nikki Smith, Adri Anytal, Rebecca Brown, Luke Green, Rachel Tucker, Paul Parsons, Danielle Groves, Katie Johnson, Laura Carrillo, Alex Kealey, Dave Partridge, Matthew Wyles, Benjamin Lindsey, Mehmet Yavuz, Mohammed Raza, Conrad Evans                                                                                                                                                                                                                                                                                                                                                                                                  |
| EPI_SL_703450, EPI_SL_703452, EPI_SL_703455 | Lighthouse Lab in Aderley Park                                                                                                                                                     | Wellcome Sanger Institute for the COVID-19 Genomics UK (COG-UK) Consortium | Jacquelyn Wynn, Mairead Hyland, The Lighthouse Lab in Aderley Park and Alex Alderton, Roberto Amato, Sonia Goncalves, Ewan Harrison, David K. Jackson, Ian Johnston, Dominic Kwiatkowski, Cordelia Langford, John Sillito on behalf of the Wellcome Sanger Institute COVID-19 Surveillance Team                                                                                                                                                                                                                                                                                                                                                                              |
| EPI_SL_703458                               | Lighthouse Lab in Glasgow                                                                                                                                                          | Wellcome Sanger Institute for the COVID-19 Genomics UK (COG-UK) Consortium | Happer VanSteerhouse, Yurni Kasai, David Gray, Carol Clugston, Anna Dominiczak and Alex Alderton, Roberto Amato, Sonia Goncalves, Ewan Harrison, David K. Jackson, Ian Johnston, Dominic Kwiatkowski, Cordelia Langford, John Sillito on behalf of the Wellcome Sanger Institute COVID-19 Surveillance Team                                                                                                                                                                                                                                                                                                                                                                  |
| EPI_SL_703462                               | Department of Pathology, University of Cambridge                                                                                                                                   | COVID-19 Genomics UK (COG-UK) Consortium                                   | Aminu S. Jahun, Yasmin Chaudhry, Grant Hall, Iliana Georgiana, Myra Hosmilo, Martin D. Curran, Maile Plockert, Surendra Parmar, Ian Goodfellow                                                                                                                                                                                                                                                                                                                                                                                                                                                                                                                               |
| EPI_SL_703463                               | Lighthouse Lab in Glasgow                                                                                                                                                          | Wellcome Sanger Institute for the COVID-19 Genomics UK (COG-UK) Consortium | Happer VanSteerhouse, Yurni Kasai, David Gray, Carol Clugston, Anna Dominiczak and Alex Alderton, Roberto Amato, Sonia Goncalves, Ewan Harrison, David K. Jackson, Ian Johnston, Dominic Kwiatkowski, Cordelia Langford, John Sillito on behalf of the Wellcome Sanger Institute COVID-19 Surveillance Team                                                                                                                                                                                                                                                                                                                                                                  |
| EPI_SL_703467                               | Lighthouse Lab in Aderley Park                                                                                                                                                     | Wellcome Sanger Institute for the COVID-19 Genomics UK (COG-UK) Consortium | Jacquelyn Wynn, Mairead Hyland, The Lighthouse Lab in Aderley Park and Alex Alderton, Roberto Amato, Sonia Goncalves, Ewan Harrison, David K. Jackson, Ian Johnston, Dominic Kwiatkowski, Cordelia Langford, John Sillito on behalf of the Wellcome Sanger Institute COVID-19 Surveillance Team                                                                                                                                                                                                                                                                                                                                                                              |
| EPI_SL_703471                               | Department of Pathology, University of Cambridge                                                                                                                                   | COVID-19 Genomics UK (COG-UK) Consortium                                   | Aminu S. Jahun, Yasmin Chaudhry, Grant Hall, Iliana Georgiana, Myra Hosmilo, Martin D. Curran, Maile Plockert, Surendra Parmar, Ian Goodfellow                                                                                                                                                                                                                                                                                                                                                                                                                                                                                                                               |
| EPI_SL_703475, EPI_SL_703478, EPI_SL_703480 | Lighthouse Lab in Aderley Park                                                                                                                                                     | Wellcome Sanger Institute for the COVID-19 Genomics UK (COG-UK) Consortium | Jacquelyn Wynn, Mairead Hyland, The Lighthouse Lab in Aderley Park and Alex Alderton, Roberto Amato, Sonia Goncalves, Ewan Harrison, David K. Jackson, Ian Johnston, Dominic Kwiatkowski, Cordelia Langford, John Sillito on behalf of the Wellcome Sanger Institute COVID-19 Surveillance Team                                                                                                                                                                                                                                                                                                                                                                              |
| EPI_SL_703481                               | Liverpool Clinical Laboratories                                                                                                                                                    | COVID-19 Genomics UK (COG-UK) Consortium                                   | Sam Hadeney, Anika Lueder, Steve Paterson, Julian Hiscox, Alistair Dargy, M Almsaid, A Alrezkhi, Muhammad Alruway, Stuart D Armstrong, Jones Benjamin, Eleanor G Bentley, Anu Charwal, Jordan Clark, Angela Cowell, Richard Eccles, Isabel Garcia-Domingo, Matthew Gemmill, Alessandro Gerada, PFR Gilmore, Richard Gregory, Ximeng Han, Catherine Hartley, Margaret Hughes, Miran Iurizaga-Gomara, James Jones, L Liu, Jennifer Manson, Charlotte Nelson, Elaine O'Leary, Cassie Orlaji, Rebekah Penrice-Handl, Lucile Rankow, NP P Randle, Trevor Ian Robinson, Parul Sharma, Ghada T Shawil, James P Stewart, Neil Swainston, Estelma Vamos, Joanne Watts, Mark Whitehead |
| EPI_SL_703484, EPI_SL_703487                | Northumbria University / South Tees Hospitals NHS Foundation Trust / North Tees and Hartlepool NHS Foundation Trust / Newcastle Hospitals NHS Foundation Trust                     | COVID-19 Genomics UK (COG-UK) Consortium                                   | Darren L Smith, Andrew Nelson, Matthew Bastion, Gagg R Young, Joshua Loh, John Allan, Mohammad A Tariq, Giles S Holt, Gary Black, Wen C Yew, Lynn Dover, Paul Baker, Steve Liggitt, Sarah Essex, Jane Greenaway, Debra Padgett, Olive Graham, Garen Scott, Edward Barton, Emma Swindells, Brendan Payne, Jennifer Collins, Yvst Taha, Gary Eltringham                                                                                                                                                                                                                                                                                                                        |
| EPI_SL_703488                               | Lighthouse Lab in Aderley Park                                                                                                                                                     | Wellcome Sanger Institute for the COVID-19 Genomics UK (COG-UK) Consortium | Jacquelyn Wynn, Mairead Hyland, The Lighthouse Lab in Aderley Park and Alex Alderton, Roberto Amato, Sonia Goncalves, Ewan Harrison, David K. Jackson, Ian Johnston, Dominic Kwiatkowski, Cordelia Langford, John Sillito on behalf of the Wellcome Sanger Institute COVID-19 Surveillance Team                                                                                                                                                                                                                                                                                                                                                                              |
| EPI_SL_703489                               | Centre for Enzyme Innovation, University of Portsmouth / Translational Research Laboratory, Portsmouth Hospitals NHS Trust                                                         | COVID-19 Genomics UK (COG-UK) Consortium                                   | Angela Beckett, Yann Bourgeois Garry Scarlett, Sharon Glaysher, Scott Elliott, Kelly Dicknell, Robert Impey, Alyson Lloyd/Sarah Wylie, Ethan Butcher, Aroop Chaulhan, Samuel Hoosen                                                                                                                                                                                                                                                                                                                                                                                                                                                                                          |
| EPI_SL_703491                               | Lighthouse Lab in Glasgow                                                                                                                                                          | Wellcome Sanger Institute for the COVID-19 Genomics UK (COG-UK) Consortium | Happer VanSteerhouse, Yurni Kasai, David Gray, Carol Clugston, Anna Dominiczak and Alex Alderton, Roberto Amato, Sonia Goncalves, Ewan Harrison, David K. Jackson, Ian Johnston, Dominic Kwiatkowski, Cordelia Langford, John Sillito on behalf of the Wellcome Sanger Institute COVID-19 Surveillance Team                                                                                                                                                                                                                                                                                                                                                                  |
| EPI_SL_703493                               | Lighthouse Lab in Aderley Park                                                                                                                                                     | Wellcome Sanger Institute for the COVID-19 Genomics UK (COG-UK) Consortium | Jacquelyn Wynn, Mairead Hyland, The Lighthouse Lab in Aderley Park and Alex Alderton, Roberto Amato, Sonia Goncalves, Ewan Harrison, David K. Jackson, Ian Johnston, Dominic Kwiatkowski, Cordelia Langford, John Sillito on behalf of the Wellcome Sanger Institute COVID-19 Surveillance Team                                                                                                                                                                                                                                                                                                                                                                              |
| EPI_SL_703497                               | Centre for Enzyme Innovation, University of Portsmouth / Translational Research Laboratory, Portsmouth Hospitals NHS Trust                                                         | COVID-19 Genomics UK (COG-UK) Consortium                                   | Happer VanSteerhouse, Yurni Kasai, David Gray, Carol Clugston, Anna Dominiczak and Alex Alderton, Roberto Amato, Sonia Goncalves, Ewan Harrison, David K. Jackson, Ian Johnston, Dominic Kwiatkowski, Cordelia Langford, John Sillito on behalf of the Wellcome Sanger Institute COVID-19 Surveillance Team                                                                                                                                                                                                                                                                                                                                                                  |
| EPI_SL_703498                               | Lighthouse Lab in Aderley Park                                                                                                                                                     | Wellcome Sanger Institute for the COVID-19 Genomics UK (COG-UK) Consortium | Angela Beckett, Yann Bourgeois Garry Scarlett, Sharon Glaysher, Scott Elliott, Kelly Dicknell, Robert Impey, Alyson Lloyd/Sarah Wylie, Ethan Butcher, Aroop Chaulhan, Samuel Hoosen                                                                                                                                                                                                                                                                                                                                                                                                                                                                                          |
| EPI_SL_703506                               | Lighthouse Lab in Glasgow                                                                                                                                                          | Wellcome Sanger Institute for the COVID-19 Genomics UK (COG-UK) Consortium | Jacquelyn Wynn, Mairead Hyland, The Lighthouse Lab in Aderley Park and Alex Alderton, Roberto Amato, Sonia Goncalves, Ewan Harrison, David K. Jackson, Ian Johnston, Dominic Kwiatkowski, Cordelia Langford, John Sillito on behalf of the Wellcome Sanger Institute COVID-19 Surveillance Team                                                                                                                                                                                                                                                                                                                                                                              |
| EPI_SL_703507                               | Lighthouse Lab in Aderley Park                                                                                                                                                     | Wellcome Sanger Institute for the COVID-19 Genomics UK (COG-UK) Consortium | Jacquelyn Wynn, Mairead Hyland, The Lighthouse Lab in Aderley Park and Alex Alderton, Roberto Amato, Sonia Goncalves, Ewan Harrison, David K. Jackson, Ian Johnston, Dominic Kwiatkowski, Cordelia Langford, John Sillito on behalf of the Wellcome Sanger Institute COVID-19 Surveillance Team                                                                                                                                                                                                                                                                                                                                                                              |
| EPI_SL_703513                               | Department of Pathology, University of Cambridge                                                                                                                                   | COVID-19 Genomics UK (COG-UK) Consortium                                   | Aminu S. Jahun, Yasmin Chaudhry, Grant Hall, Iliana Georgiana, Myra Hosmilo, Martin D. Curran, Maile Plockert, Surendra Parmar, Ian Goodfellow                                                                                                                                                                                                                                                                                                                                                                                                                                                                                                                               |
| EPI_SL_703517                               | Lighthouse Lab in Glasgow                                                                                                                                                          | Wellcome Sanger Institute for the COVID-19 Genomics UK (COG-UK) Consortium | Happer VanSteerhouse, Yurni Kasai, David Gray, Carol Clugston, Anna Dominiczak and Alex Alderton, Roberto Amato, Sonia Goncalves, Ewan Harrison, David K. Jackson, Ian Johnston, Dominic Kwiatkowski, Cordelia Langford, John Sillito on behalf of the Wellcome Sanger Institute COVID-19 Surveillance Team                                                                                                                                                                                                                                                                                                                                                                  |

|                                |                                                                                                                                                                                  |                                                                            |                                                                                                                                                                                                                                                                                                                                                                                                                                                                                                                                                                                                                                                                  |
|--------------------------------|----------------------------------------------------------------------------------------------------------------------------------------------------------------------------------|----------------------------------------------------------------------------|------------------------------------------------------------------------------------------------------------------------------------------------------------------------------------------------------------------------------------------------------------------------------------------------------------------------------------------------------------------------------------------------------------------------------------------------------------------------------------------------------------------------------------------------------------------------------------------------------------------------------------------------------------------|
| EPI_ISL_703518, EPI_ISL_703528 | Lighthouse Lab in Adeley Park                                                                                                                                                    | Wellcome Sanger Institute for the COVID-19 Genomics UK (COG-UK) Consortium | Jacquelyn Wynn, Mairead Hyland, The Lighthouse Lab in Adeley Park and Alex Alderton, Roberto Amato, Sonia Goncalves, Ewan Harrison, David K. Jackson, Ian Johnston, Dominic Kwiatkowski, Cordelia Langford, John Sillitoe on behalf of the Wellcome Sanger Institute COVID-19 Surveillance Team                                                                                                                                                                                                                                                                                                                                                                  |
| EPI_ISL_703527                 | Liverpool Clinical Laboratories                                                                                                                                                  | COVID-19 Genomics UK (COG-UK) Consortium                                   | Sam Hadenay, Anita Luciad, Steve Paterson, Julian Hiscox, Alistair Darby, M Almsaud, A Alrezghi, Mubammad Alruwaili, Stuart D Armstrong, Jones Benjamin, Eleanor G Bentley, Amy Chawla, Jordan J Clark, Angela Howell, Muhammed Alruwaili, Stuart D Armstrong, Jones Benjamin, PKF Gilmore, Richard Gregory, Xming Han, Catherine Hartley, Margaret Hughes, Miran Ilturza-Gomara, James Johnson, Liliu, Jennifer Hanson, Charlotte Nelson, Elaine O'Toole, Cassie O'Leary, Rebekah Penrice-Frandel, Lucille Rankow, N.P Randle, Trevor Ian Robinson, Paul Sharma, Ghada T Shavli, James P Stewart, Neil Swainson, Exaterina Varnos, Joanna Watts, Mark Whitehead |
| EPI_ISL_703529                 | Lighthouse Lab in Glasgow                                                                                                                                                        | Wellcome Sanger Institute for the COVID-19 Genomics UK (COG-UK) Consortium | Jacquelyn Wynn, Mairead Hyland, The Lighthouse Lab in Adeley Park and Alex Alderton, Roberto Amato, Sonia Goncalves, Ewan Harrison, David K. Jackson, Ian Johnston, Dominic Kwiatkowski, Cordelia Langford, John Sillitoe on behalf of the Wellcome Sanger Institute COVID-19 Surveillance Team                                                                                                                                                                                                                                                                                                                                                                  |
| EPI_ISL_703530                 | Liverpool Clinical Laboratories                                                                                                                                                  | COVID-19 Genomics UK (COG-UK) Consortium                                   | Sam Hadenay, Anita Luciad, Steve Paterson, Julian Hiscox, Alistair Darby, M Almsaud, A Alrezghi, Mubammad Alruwaili, Stuart D Armstrong, Jones Benjamin, Eleanor G Bentley, Amy Chawla, Jordan J Clark, Angela Howell, Muhammed Alruwaili, Stuart D Armstrong, Jones Benjamin, PKF Gilmore, Richard Gregory, Xming Han, Catherine Hartley, Margaret Hughes, Miran Ilturza-Gomara, James Johnson, Liliu, Jennifer Hanson, Charlotte Nelson, Elaine O'Toole, Cassie O'Leary, Rebekah Penrice-Frandel, Lucille Rankow, N.P Randle, Trevor Ian Robinson, Paul Sharma, Ghada T Shavli, James P Stewart, Neil Swainson, Exaterina Varnos, Joanna Watts, Mark Whitehead |
| EPI_ISL_703531, EPI_ISL_703532 | Lighthouse Lab in Adeley Park                                                                                                                                                    | Wellcome Sanger Institute for the COVID-19 Genomics UK (COG-UK) Consortium | Jacquelyn Wynn, Mairead Hyland, The Lighthouse Lab in Adeley Park and Alex Alderton, Roberto Amato, Sonia Goncalves, Ewan Harrison, David K. Jackson, Ian Johnston, Dominic Kwiatkowski, Cordelia Langford, John Sillitoe on behalf of the Wellcome Sanger Institute COVID-19 Surveillance Team                                                                                                                                                                                                                                                                                                                                                                  |
| EPI_ISL_703533                 | Northumbria University / South Tees Hospitals NHS Foundation Trust / North Tees and Hartlepool NHS Foundation Trust / Newcastle Hospitals NHS Foundation Trust                   | COVID-19 Genomics UK (COG-UK) Consortium                                   | Jacquelyn Wynn, Mairead Hyland, The Lighthouse Lab in Adeley Park and Alex Alderton, Roberto Amato, Sonia Goncalves, Ewan Harrison, David K. Jackson, Ian Johnston, Dominic Kwiatkowski, Cordelia Langford, John Sillitoe on behalf of the Wellcome Sanger Institute COVID-19 Surveillance Team                                                                                                                                                                                                                                                                                                                                                                  |
| EPI_ISL_703534                 | Lighthouse Lab in Glasgow                                                                                                                                                        | Wellcome Sanger Institute for the COVID-19 Genomics UK (COG-UK) Consortium | Jacquelyn Wynn, Mairead Hyland, The Lighthouse Lab in Adeley Park and Alex Alderton, Roberto Amato, Sonia Goncalves, Ewan Harrison, David K. Jackson, Ian Johnston, Dominic Kwiatkowski, Cordelia Langford, John Sillitoe on behalf of the Wellcome Sanger Institute COVID-19 Surveillance Team                                                                                                                                                                                                                                                                                                                                                                  |
| EPI_ISL_703535                 | Northumbria University / South Tees Hospitals NHS Foundation Trust / North Tees and Hartlepool NHS Foundation Trust / Newcastle Hospitals NHS Foundation Trust                   | COVID-19 Genomics UK (COG-UK) Consortium                                   | Jacquelyn Wynn, Mairead Hyland, The Lighthouse Lab in Adeley Park and Alex Alderton, Roberto Amato, Sonia Goncalves, Ewan Harrison, David K. Jackson, Ian Johnston, Dominic Kwiatkowski, Cordelia Langford, John Sillitoe on behalf of the Wellcome Sanger Institute COVID-19 Surveillance Team                                                                                                                                                                                                                                                                                                                                                                  |
| EPI_ISL_703536                 | Lighthouse Lab in Adeley Park                                                                                                                                                    | Wellcome Sanger Institute for the COVID-19 Genomics UK (COG-UK) Consortium | Jacquelyn Wynn, Mairead Hyland, The Lighthouse Lab in Adeley Park and Alex Alderton, Roberto Amato, Sonia Goncalves, Ewan Harrison, David K. Jackson, Ian Johnston, Dominic Kwiatkowski, Cordelia Langford, John Sillitoe on behalf of the Wellcome Sanger Institute COVID-19 Surveillance Team                                                                                                                                                                                                                                                                                                                                                                  |
| EPI_ISL_703537                 | Northumbria University / South Tees Hospitals NHS Foundation Trust / North Tees and Hartlepool NHS Foundation Trust / Newcastle Hospitals NHS Foundation Trust                   | COVID-19 Genomics UK (COG-UK) Consortium                                   | Jacquelyn Wynn, Mairead Hyland, The Lighthouse Lab in Adeley Park and Alex Alderton, Roberto Amato, Sonia Goncalves, Ewan Harrison, David K. Jackson, Ian Johnston, Dominic Kwiatkowski, Cordelia Langford, John Sillitoe on behalf of the Wellcome Sanger Institute COVID-19 Surveillance Team                                                                                                                                                                                                                                                                                                                                                                  |
| EPI_ISL_703539                 | Lighthouse Lab in Adeley Park                                                                                                                                                    | Wellcome Sanger Institute for the COVID-19 Genomics UK (COG-UK) Consortium | Jacquelyn Wynn, Mairead Hyland, The Lighthouse Lab in Adeley Park and Alex Alderton, Roberto Amato, Sonia Goncalves, Ewan Harrison, David K. Jackson, Ian Johnston, Dominic Kwiatkowski, Cordelia Langford, John Sillitoe on behalf of the Wellcome Sanger Institute COVID-19 Surveillance Team                                                                                                                                                                                                                                                                                                                                                                  |
| EPI_ISL_703540                 | Northumbria University / South Tees Hospitals NHS Foundation Trust / North Tees and Hartlepool NHS Foundation Trust / Newcastle Hospitals NHS Foundation Trust                   | COVID-19 Genomics UK (COG-UK) Consortium                                   | Jacquelyn Wynn, Mairead Hyland, The Lighthouse Lab in Adeley Park and Alex Alderton, Roberto Amato, Sonia Goncalves, Ewan Harrison, David K. Jackson, Ian Johnston, Dominic Kwiatkowski, Cordelia Langford, John Sillitoe on behalf of the Wellcome Sanger Institute COVID-19 Surveillance Team                                                                                                                                                                                                                                                                                                                                                                  |
| EPI_ISL_703541                 | Lighthouse Lab in Glasgow                                                                                                                                                        | Wellcome Sanger Institute for the COVID-19 Genomics UK (COG-UK) Consortium | Jacquelyn Wynn, Mairead Hyland, The Lighthouse Lab in Adeley Park and Alex Alderton, Roberto Amato, Sonia Goncalves, Ewan Harrison, David K. Jackson, Ian Johnston, Dominic Kwiatkowski, Cordelia Langford, John Sillitoe on behalf of the Wellcome Sanger Institute COVID-19 Surveillance Team                                                                                                                                                                                                                                                                                                                                                                  |
| EPI_ISL_703542                 | Northumbria University / South Tees Hospitals NHS Foundation Trust / North Tees and Hartlepool NHS Foundation Trust / Newcastle Hospitals NHS Foundation Trust                   | COVID-19 Genomics UK (COG-UK) Consortium                                   | Jacquelyn Wynn, Mairead Hyland, The Lighthouse Lab in Adeley Park and Alex Alderton, Roberto Amato, Sonia Goncalves, Ewan Harrison, David K. Jackson, Ian Johnston, Dominic Kwiatkowski, Cordelia Langford, John Sillitoe on behalf of the Wellcome Sanger Institute COVID-19 Surveillance Team                                                                                                                                                                                                                                                                                                                                                                  |
| EPI_ISL_703543                 | Lighthouse Lab in Adeley Park                                                                                                                                                    | Wellcome Sanger Institute for the COVID-19 Genomics UK (COG-UK) Consortium | Jacquelyn Wynn, Mairead Hyland, The Lighthouse Lab in Adeley Park and Alex Alderton, Roberto Amato, Sonia Goncalves, Ewan Harrison, David K. Jackson, Ian Johnston, Dominic Kwiatkowski, Cordelia Langford, John Sillitoe on behalf of the Wellcome Sanger Institute COVID-19 Surveillance Team                                                                                                                                                                                                                                                                                                                                                                  |
| EPI_ISL_703545                 | Northumbria University / South Tees Hospitals NHS Foundation Trust / North Tees and Hartlepool NHS Foundation Trust / Newcastle Hospitals NHS Foundation Trust                   | COVID-19 Genomics UK (COG-UK) Consortium                                   | Jacquelyn Wynn, Mairead Hyland, The Lighthouse Lab in Adeley Park and Alex Alderton, Roberto Amato, Sonia Goncalves, Ewan Harrison, David K. Jackson, Ian Johnston, Dominic Kwiatkowski, Cordelia Langford, John Sillitoe on behalf of the Wellcome Sanger Institute COVID-19 Surveillance Team                                                                                                                                                                                                                                                                                                                                                                  |
| EPI_ISL_703553, EPI_ISL_703557 | Lighthouse Lab in Glasgow                                                                                                                                                        | Wellcome Sanger Institute for the COVID-19 Genomics UK (COG-UK) Consortium | Jacquelyn Wynn, Mairead Hyland, The Lighthouse Lab in Adeley Park and Alex Alderton, Roberto Amato, Sonia Goncalves, Ewan Harrison, David K. Jackson, Ian Johnston, Dominic Kwiatkowski, Cordelia Langford, John Sillitoe on behalf of the Wellcome Sanger Institute COVID-19 Surveillance Team                                                                                                                                                                                                                                                                                                                                                                  |
| EPI_ISL_703559                 | Centre for Enzyme Innovation, University of Portsmouth / Translational Research Laboratory, Portsmouth Hospitals NHS Trust                                                       | COVID-19 Genomics UK (COG-UK) Consortium                                   | Angela Beckett, Yann Bourgeois Garry Scarlett, Sharon Glaysher, Scott Elliott, Kelly Dicknell, Robert Impey, Allison Lloyd/Sarah, Willie Ethan Butcher, Aroop Chaudhan, Samuel Rossen                                                                                                                                                                                                                                                                                                                                                                                                                                                                            |
| EPI_ISL_703561                 | Lighthouse Lab in Glasgow                                                                                                                                                        | Wellcome Sanger Institute for the COVID-19 Genomics UK (COG-UK) Consortium | Happer VansSteerhouse, Yurni Kasai, David Gray, Carol Clugston, Anna Dominiczak and Alex Alderton, Roberto Amato, Sonia Goncalves, Ewan Harrison, David K. Jackson, Ian Johnston, Dominic Kwiatkowski, Cordelia Langford, John Sillitoe on behalf of the Wellcome Sanger Institute COVID-19 Surveillance Team                                                                                                                                                                                                                                                                                                                                                    |
| EPI_ISL_703578                 | Lighthouse Lab in Glasgow                                                                                                                                                        | Wellcome Sanger Institute for the COVID-19 Genomics UK (COG-UK) Consortium | Jacquelyn Wynn, Mairead Hyland, The Lighthouse Lab in Adeley Park and Alex Alderton, Roberto Amato, Sonia Goncalves, Ewan Harrison, David K. Jackson, Ian Johnston, Dominic Kwiatkowski, Cordelia Langford, John Sillitoe on behalf of the Wellcome Sanger Institute COVID-19 Surveillance Team                                                                                                                                                                                                                                                                                                                                                                  |
| EPI_ISL_703579                 | Virlogy Department, Sheffield Teaching Hospitals NHS Foundation Trust, Department of Infection, Immunity and Cardiovascular Disease, The Medical School, University of Sheffield | COVID-19 Genomics UK (COG-UK) Consortium                                   | Thushani de Silva, Matthew Parker, Nikki Smith, Adri Anjali, Rebecca Brown, Luke Green, Rachel Tucker, Paul Parsons, Danielle Groves, Katie Johnson, Laura Carrtero, Alex Keeley, Dave Partridge, Matthew Wyles, Benjamin Lindsay, Mehmet Yazuz, Mohammad Raza, Carad E vans                                                                                                                                                                                                                                                                                                                                                                                     |
| EPI_ISL_703580                 | Lighthouse Lab in Adeley Park                                                                                                                                                    | Wellcome Sanger Institute for the COVID-19 Genomics UK (COG-UK) Consortium | Jacquelyn Wynn, Mairead Hyland, The Lighthouse Lab in Adeley Park and Alex Alderton, Roberto Amato, Sonia Goncalves, Ewan Harrison, David K. Jackson, Ian Johnston, Dominic Kwiatkowski, Cordelia Langford, John Sillitoe on behalf of the Wellcome Sanger Institute COVID-19 Surveillance Team                                                                                                                                                                                                                                                                                                                                                                  |
| EPI_ISL_703583                 | Lighthouse Lab in Glasgow                                                                                                                                                        | Wellcome Sanger Institute for the COVID-19 Genomics UK (COG-UK) Consortium | Jacquelyn Wynn, Mairead Hyland, The Lighthouse Lab in Adeley Park and Alex Alderton, Roberto Amato, Sonia Goncalves, Ewan Harrison, David K. Jackson, Ian Johnston, Dominic Kwiatkowski, Cordelia Langford, John Sillitoe on behalf of the Wellcome Sanger Institute COVID-19 Surveillance Team                                                                                                                                                                                                                                                                                                                                                                  |

|                                                                                                |                                                                                                                                                                                  |                                                                            |                                                                                                                                                                                                                                                                                                                                                                                                                                                                                                                                                                                                                                                                                    |
|------------------------------------------------------------------------------------------------|----------------------------------------------------------------------------------------------------------------------------------------------------------------------------------|----------------------------------------------------------------------------|------------------------------------------------------------------------------------------------------------------------------------------------------------------------------------------------------------------------------------------------------------------------------------------------------------------------------------------------------------------------------------------------------------------------------------------------------------------------------------------------------------------------------------------------------------------------------------------------------------------------------------------------------------------------------------|
| EPI_ISL_703586, EPI_ISL_703588, EPI_ISL_703596, EPI_ISL_703591, EPI_ISL_703594, EPI_ISL_703597 | Lighthouse Lab in Glasgow                                                                                                                                                        | Wellcome Sanger Institute for the COVID-19 Genomics UK (COG-UK) Consortium | Jacquelyn Wynn, Mairead Hyland, The Lighthouse Lab in Alderley Park and Alex Alderton, Roberto Amato, Sonia Goncalves, Ewan Harrison, David K. Jackson, Ian Johnston, Dominic Kwiatkowski, Cordelia Langford, John Sillito on behalf of the Wellcome Sanger Institute COVID-19 Surveillance Team                                                                                                                                                                                                                                                                                                                                                                                   |
| EPI_ISL_703601                                                                                 | Lighthouse Lab in Glasgow                                                                                                                                                        | Wellcome Sanger Institute for the COVID-19 Genomics UK (COG-UK) Consortium | Harper VansSteerhouse, Yurni Kasai, David Gray, Carol Clugston, Anna Dominiczak and Alex Alderton, Roberto Amato, Sonia Goncalves, Ewan Harrison, David K. Jackson, Ian Johnston, Dominic Kwiatkowski, Cordelia Langford, John Sillito on behalf of the Wellcome Sanger Institute COVID-19 Surveillance Team                                                                                                                                                                                                                                                                                                                                                                       |
| EPI_ISL_703602                                                                                 | Lighthouse Lab in Alderley Park                                                                                                                                                  | Wellcome Sanger Institute for the COVID-19 Genomics UK (COG-UK) Consortium | Thushan de Silva, Matthew Parker, Nikki Smith, Adri Anygal, Rebecca Brown, Luke Green, Rachel Tucker, Paul Parsons, Danielle Groves, Katie Johnson, Laura Carriero, Alex Kealey, Dave Partridge, Matthew Wyles, Benjamin Lindsey, Mehmet Yavuz, Mohammad Raza, Carad Evans                                                                                                                                                                                                                                                                                                                                                                                                         |
| EPI_ISL_703604                                                                                 | Lighthouse Lab in Alderley Park                                                                                                                                                  | Wellcome Sanger Institute for the COVID-19 Genomics UK (COG-UK) Consortium | Jacquelyn Wynn, Mairead Hyland, The Lighthouse Lab in Alderley Park and Alex Alderton, Roberto Amato, Sonia Goncalves, Ewan Harrison, David K. Jackson, Ian Johnston, Dominic Kwiatkowski, Cordelia Langford, John Sillito on behalf of the Wellcome Sanger Institute COVID-19 Surveillance Team                                                                                                                                                                                                                                                                                                                                                                                   |
| EPI_ISL_703605                                                                                 | Lighthouse Lab in Alderley Park                                                                                                                                                  | Wellcome Sanger Institute for the COVID-19 Genomics UK (COG-UK) Consortium | Thushan de Silva, Matthew Parker, Nikki Smith, Adri Anygal, Rebecca Brown, Luke Green, Rachel Tucker, Paul Parsons, Danielle Groves, Katie Johnson, Laura Carriero, Alex Kealey, Dave Partridge, Matthew Wyles, Benjamin Lindsey, Mehmet Yavuz, Mohammad Raza, Carad Evans                                                                                                                                                                                                                                                                                                                                                                                                         |
| EPI_ISL_703608                                                                                 | Lighthouse Lab in Glasgow                                                                                                                                                        | Wellcome Sanger Institute for the COVID-19 Genomics UK (COG-UK) Consortium | Jacquelyn Wynn, Mairead Hyland, The Lighthouse Lab in Alderley Park and Alex Alderton, Roberto Amato, Sonia Goncalves, Ewan Harrison, David K. Jackson, Ian Johnston, Dominic Kwiatkowski, Cordelia Langford, John Sillito on behalf of the Wellcome Sanger Institute COVID-19 Surveillance Team                                                                                                                                                                                                                                                                                                                                                                                   |
| EPI_ISL_703609                                                                                 | Lighthouse Lab in Glasgow                                                                                                                                                        | Wellcome Sanger Institute for the COVID-19 Genomics UK (COG-UK) Consortium | Harper VansSteerhouse, Yurni Kasai, David Gray, Carol Clugston, Anna Dominiczak and Alex Alderton, Roberto Amato, Sonia Goncalves, Ewan Harrison, David K. Jackson, Ian Johnston, Dominic Kwiatkowski, Cordelia Langford, John Sillito on behalf of the Wellcome Sanger Institute COVID-19 Surveillance Team                                                                                                                                                                                                                                                                                                                                                                       |
| EPI_ISL_703611                                                                                 | Liverpool Clinical Laboratories                                                                                                                                                  | Wellcome Sanger Institute for the COVID-19 Genomics UK (COG-UK) Consortium | Catherine Moore, Johnathan Evans, Laura Gifford, Malorie Perry, Simon Cottrell, Angela Marchbank, Alec Birchley, Alexander Adams, Amy Gaskin, Bree Gattica-Wilcox, Jason Coombes, Joel Southgate, Lauren Gilbert, Lee Graham, Nicole Paschiani, Sara Kunzjens-Summerhayes, Sarah Taylor, Sophie Jones, Sara Ray, Matthew Bull, Joanna Walkins, Sally Corden, Tom Connor                                                                                                                                                                                                                                                                                                            |
| EPI_ISL_703617                                                                                 | Lighthouse Lab in Glasgow                                                                                                                                                        | Wellcome Sanger Institute for the COVID-19 Genomics UK (COG-UK) Consortium | Sam Haddenby, Ania Luczak, Steve Paterson, Julian Hiscox, Alistair Darcy, M Aimsaud, A Altezah, Muhammad Alruwaili, Stuart D Armstrong, Jones Benjamin, Eleanor G Bentley, Anu Chawla, Jordan J Clark, Angela Cowell, Richard Eccles, Isabel Garcia-Donval, Matthew Gemmel, Alessandro Gerada, PFR Gilmore, Richard Gregory, Ximeng Han, Catherine Hartley, Margaret Hughes, Miran Irturza-Gomara, James Johnson, L Liu, Jennifer Manson, Charlotte Nelson, Elaine O'Toole, Casiste Oriadeji, Rebekah Penrice-Randall, Lucile Rambow, N P Randle, Trevor Ian Robinson, Parul Sharma, Ghada T Shawi, James P Stewart, Neil Swainston, Esaterina Varnos, Joanne Wats, Mark Whitehead |
| EPI_ISL_703618, EPI_ISL_703620                                                                 | Lighthouse Lab in Alderley Park                                                                                                                                                  | Wellcome Sanger Institute for the COVID-19 Genomics UK (COG-UK) Consortium | Harper VansSteerhouse, Yurni Kasai, David Gray, Carol Clugston, Anna Dominiczak and Alex Alderton, Roberto Amato, Sonia Goncalves, Ewan Harrison, David K. Jackson, Ian Johnston, Dominic Kwiatkowski, Cordelia Langford, John Sillito on behalf of the Wellcome Sanger Institute COVID-19 Surveillance Team                                                                                                                                                                                                                                                                                                                                                                       |
| EPI_ISL_703621                                                                                 | Lighthouse Lab in Glasgow                                                                                                                                                        | Wellcome Sanger Institute for the COVID-19 Genomics UK (COG-UK) Consortium | Harper VansSteerhouse, Yurni Kasai, David Gray, Carol Clugston, Anna Dominiczak and Alex Alderton, Roberto Amato, Sonia Goncalves, Ewan Harrison, David K. Jackson, Ian Johnston, Dominic Kwiatkowski, Cordelia Langford, John Sillito on behalf of the Wellcome Sanger Institute COVID-19 Surveillance Team                                                                                                                                                                                                                                                                                                                                                                       |
| EPI_ISL_703623                                                                                 | Lighthouse Lab in Alderley Park                                                                                                                                                  | Wellcome Sanger Institute for the COVID-19 Genomics UK (COG-UK) Consortium | Jacquelyn Wynn, Mairead Hyland, The Lighthouse Lab in Alderley Park and Alex Alderton, Roberto Amato, Sonia Goncalves, Ewan Harrison, David K. Jackson, Ian Johnston, Dominic Kwiatkowski, Cordelia Langford, John Sillito on behalf of the Wellcome Sanger Institute COVID-19 Surveillance Team                                                                                                                                                                                                                                                                                                                                                                                   |
| EPI_ISL_703626                                                                                 | Lighthouse Lab in Glasgow                                                                                                                                                        | Wellcome Sanger Institute for the COVID-19 Genomics UK (COG-UK) Consortium | Harper VansSteerhouse, Yurni Kasai, David Gray, Carol Clugston, Anna Dominiczak and Alex Alderton, Roberto Amato, Sonia Goncalves, Ewan Harrison, David K. Jackson, Ian Johnston, Dominic Kwiatkowski, Cordelia Langford, John Sillito on behalf of the Wellcome Sanger Institute COVID-19 Surveillance Team                                                                                                                                                                                                                                                                                                                                                                       |
| EPI_ISL_703627                                                                                 | Wales Specialist Virology Centre Sequencing lab: Pathogen Genomics Unit                                                                                                          | Wellcome Sanger Institute for the COVID-19 Genomics UK (COG-UK) Consortium | Harper VansSteerhouse, Yurni Kasai, David Gray, Carol Clugston, Anna Dominiczak and Alex Alderton, Roberto Amato, Sonia Goncalves, Ewan Harrison, David K. Jackson, Ian Johnston, Dominic Kwiatkowski, Cordelia Langford, John Sillito on behalf of the Wellcome Sanger Institute COVID-19 Surveillance Team                                                                                                                                                                                                                                                                                                                                                                       |
| EPI_ISL_703630                                                                                 | Lighthouse Lab in Alderley Park                                                                                                                                                  | Wellcome Sanger Institute for the COVID-19 Genomics UK (COG-UK) Consortium | Catherine Moore, Johnathan Evans, Laura Gifford, Malorie Perry, Simon Cottrell, Angela Marchbank, Alec Birchley, Alexander Adams, Amy Gaskin, Bree Gattica-Wilcox, Jason Coombes, Joel Southgate, Lauren Gilbert, Lee Graham, Nicole Paschiani, Sara Kunzjens-Summerhayes, Sarah Taylor, Sophie Jones, Sara Ray, Matthew Bull, Joanna Walkins, Sally Corden, Tom Connor                                                                                                                                                                                                                                                                                                            |
| EPI_ISL_703633, EPI_ISL_703634                                                                 | Lighthouse Lab in Glasgow                                                                                                                                                        | Wellcome Sanger Institute for the COVID-19 Genomics UK (COG-UK) Consortium | Jacquelyn Wynn, Mairead Hyland, The Lighthouse Lab in Alderley Park and Alex Alderton, Roberto Amato, Sonia Goncalves, Ewan Harrison, David K. Jackson, Ian Johnston, Dominic Kwiatkowski, Cordelia Langford, John Sillito on behalf of the Wellcome Sanger Institute COVID-19 Surveillance Team                                                                                                                                                                                                                                                                                                                                                                                   |
| EPI_ISL_703636                                                                                 | Virology Department, Sheffield Teaching Hospitals NHS Foundation Trust/Department of Infection, Immunity and Cardiovascular Disease, The Medical School, University of Sheffield | Wellcome Sanger Institute for the COVID-19 Genomics UK (COG-UK) Consortium | Thushan de Silva, Matthew Parker, Nikki Smith, Adri Anygal, Rebecca Brown, Luke Green, Rachel Tucker, Paul Parsons, Danielle Groves, Katie Johnson, Laura Carriero, Alex Kealey, Dave Partridge, Matthew Wyles, Benjamin Lindsey, Mehmet Yavuz, Mohammad Raza, Carad Evans                                                                                                                                                                                                                                                                                                                                                                                                         |
| EPI_ISL_703637, EPI_ISL_703638                                                                 | Lighthouse Lab in Alderley Park                                                                                                                                                  | Wellcome Sanger Institute for the COVID-19 Genomics UK (COG-UK) Consortium | Jacquelyn Wynn, Mairead Hyland, The Lighthouse Lab in Alderley Park and Alex Alderton, Roberto Amato, Sonia Goncalves, Ewan Harrison, David K. Jackson, Ian Johnston, Dominic Kwiatkowski, Cordelia Langford, John Sillito on behalf of the Wellcome Sanger Institute COVID-19 Surveillance Team                                                                                                                                                                                                                                                                                                                                                                                   |
| EPI_ISL_703640, EPI_ISL_703641, EPI_ISL_703643                                                 | Lighthouse Lab in Glasgow                                                                                                                                                        | Wellcome Sanger Institute for the COVID-19 Genomics UK (COG-UK) Consortium | Harper VansSteerhouse, Yurni Kasai, David Gray, Carol Clugston, Anna Dominiczak and Alex Alderton, Roberto Amato, Sonia Goncalves, Ewan Harrison, David K. Jackson, Ian Johnston, Dominic Kwiatkowski, Cordelia Langford, John Sillito on behalf of the Wellcome Sanger Institute COVID-19 Surveillance Team                                                                                                                                                                                                                                                                                                                                                                       |
| EPI_ISL_703646                                                                                 | Lighthouse Lab in Alderley Park                                                                                                                                                  | Wellcome Sanger Institute for the COVID-19 Genomics UK (COG-UK) Consortium | Jacquelyn Wynn, Mairead Hyland, The Lighthouse Lab in Alderley Park and Alex Alderton, Roberto Amato, Sonia Goncalves, Ewan Harrison, David K. Jackson, Ian Johnston, Dominic Kwiatkowski, Cordelia Langford, John Sillito on behalf of the Wellcome Sanger Institute COVID-19 Surveillance Team                                                                                                                                                                                                                                                                                                                                                                                   |
| EPI_ISL_703651, EPI_ISL_703654, EPI_ISL_703661                                                 | Lighthouse Lab in Glasgow                                                                                                                                                        | Wellcome Sanger Institute for the COVID-19 Genomics UK (COG-UK) Consortium | Harper VansSteerhouse, Yurni Kasai, David Gray, Carol Clugston, Anna Dominiczak and Alex Alderton, Roberto Amato, Sonia Goncalves, Ewan Harrison, David K. Jackson, Ian Johnston, Dominic Kwiatkowski, Cordelia Langford, John Sillito on behalf of the Wellcome Sanger Institute COVID-19 Surveillance Team                                                                                                                                                                                                                                                                                                                                                                       |
| EPI_ISL_703662                                                                                 | Lighthouse Lab in Alderley Park                                                                                                                                                  | Wellcome Sanger Institute for the COVID-19 Genomics UK (COG-UK) Consortium | Jacquelyn Wynn, Mairead Hyland, The Lighthouse Lab in Alderley Park and Alex Alderton, Roberto Amato, Sonia Goncalves, Ewan Harrison, David K. Jackson, Ian Johnston, Dominic Kwiatkowski, Cordelia Langford, John Sillito on behalf of the Wellcome Sanger Institute COVID-19 Surveillance Team                                                                                                                                                                                                                                                                                                                                                                                   |
| EPI_ISL_703663                                                                                 | Liverpool Clinical Laboratories                                                                                                                                                  | Wellcome Sanger Institute for the COVID-19 Genomics UK (COG-UK) Consortium | Sam Haddenby, Ania Luczak, Steve Paterson, Julian Hiscox, Alistair Darcy, M Aimsaud, A Altezah, Muhammad Alruwaili, Stuart D Armstrong, Jones Benjamin, Eleanor G Bentley, Anu Chawla, Jordan J Clark, Angela Cowell, Richard Eccles, Isabel Garcia-Donval, Matthew Gemmel, Alessandro Gerada, PFR Gilmore, Richard Gregory, Ximeng Han, Catherine Hartley, Margaret Hughes, Miran Irturza-Gomara, James Johnson, L Liu, Jennifer Manson, Charlotte Nelson, Elaine O'Toole, Casiste Oriadeji, Rebekah Penrice-Randall, Lucile Rambow, N P Randle, Trevor Ian Robinson, Parul Sharma, Ghada T Shawi, James P Stewart, Neil Swainston, Esaterina Varnos, Joanne Wats, Mark Whitehead |
| EPI_ISL_703665                                                                                 | Lighthouse Lab in Alderley Park                                                                                                                                                  | Wellcome Sanger Institute for the COVID-19 Genomics UK (COG-UK) Consortium | Jacquelyn Wynn, Mairead Hyland, The Lighthouse Lab in Alderley Park and Alex Alderton, Roberto Amato, Sonia Goncalves, Ewan Harrison, David K. Jackson, Ian Johnston, Dominic Kwiatkowski, Cordelia Langford, John Sillito on behalf of the Wellcome Sanger Institute COVID-19 Surveillance Team                                                                                                                                                                                                                                                                                                                                                                                   |
| EPI_ISL_703669, EPI_ISL_703672                                                                 | Lighthouse Lab in Glasgow                                                                                                                                                        | Wellcome Sanger Institute for the COVID-19 Genomics UK (COG-UK) Consortium | Harper VansSteerhouse, Yurni Kasai, David Gray, Carol Clugston, Anna Dominiczak and Alex Alderton, Roberto Amato, Sonia Goncalves, Ewan Harrison, David K. Jackson, Ian Johnston, Dominic Kwiatkowski, Cordelia Langford, John Sillito on behalf of the Wellcome Sanger Institute COVID-19 Surveillance Team                                                                                                                                                                                                                                                                                                                                                                       |

|                                                                |                                                                                                                                                                                                                     |                                                                            |                                                                                                                                                                                                                                                                                                                                                                                                                                                                                                                                                                                                                                                                                     |
|----------------------------------------------------------------|---------------------------------------------------------------------------------------------------------------------------------------------------------------------------------------------------------------------|----------------------------------------------------------------------------|-------------------------------------------------------------------------------------------------------------------------------------------------------------------------------------------------------------------------------------------------------------------------------------------------------------------------------------------------------------------------------------------------------------------------------------------------------------------------------------------------------------------------------------------------------------------------------------------------------------------------------------------------------------------------------------|
| EP1_ISL_703675, EP1_ISL_703678                                 | Lighthouse Lab in Adeleley Park                                                                                                                                                                                     | Wellcome Sanger Institute for the COVID-19 Genomics UK (COG-UK) Consortium | Jacquelyn Wynn, Mairead Hyland, The Lighthouse Lab in Adeleley Park and Alex Alderton, Roberto Amato, Sonia Goncalves, Ewan Harrison, David K. Jackson, Ian Johnston, Dominic Kwiatkowski, Cordelia Langford, John Sillito on behalf of the Wellcome Sanger Institute COVID-19 Surveillance Team                                                                                                                                                                                                                                                                                                                                                                                    |
| EP1_ISL_703685                                                 | Lighthouse Lab in Glasgow                                                                                                                                                                                           | Wellcome Sanger Institute for the COVID-19 Genomics UK (COG-UK) Consortium | Harper VanSteenhouse, Yumi Kasai, Carol Clugston, Anna Dominiczak and Alex Alderton, Roberto Amato, Sonia Goncalves, Ewan Harrison, David K. Jackson, Ian Johnston, Dominic Kwiatkowski, Cordelia Langford, John Sillito on behalf of the Wellcome Sanger Institute COVID-19 Surveillance Team                                                                                                                                                                                                                                                                                                                                                                                      |
| EP1_ISL_703688                                                 | Lighthouse Lab in Adeleley Park                                                                                                                                                                                     | Wellcome Sanger Institute for the COVID-19 Genomics UK (COG-UK) Consortium | Jacquelyn Wynn, Mairead Hyland, The Lighthouse Lab in Adeleley Park and Alex Alderton, Roberto Amato, Sonia Goncalves, Ewan Harrison, David K. Jackson, Ian Johnston, Dominic Kwiatkowski, Cordelia Langford, John Sillito on behalf of the Wellcome Sanger Institute COVID-19 Surveillance Team                                                                                                                                                                                                                                                                                                                                                                                    |
| EP1_ISL_703690                                                 | Liverpool Clinical Laboratories                                                                                                                                                                                     | COVID-19 Genomics UK (COG-UK) Consortium                                   | Sam Hadenby, Anila Lucaci, Steve Paterson, Julian Hiscox, Alistair Darby, M Almsaud, A Alrezkhi, Muhammad Alruwaili, Stuart D Armstrong, Jones Benjamin, Eleanor G Bentley, Anu Chawla, Jordan J Clark, Angela Cowell, Richard Eccles, Isabel Garcia-Donval, Matthew Gemmill, Alessandro Gerada, PKF Gilmore, Richard Gregory, Ximeng Han, Catherine Hartley, Margaret Hughes, Mirren Iurriza-Gomara, James Johnson, L Liu, Jennifer Manson, Charlotte Nelson, Elaine O'Toole, Cassie Orladi, Rebekah Penrice-Hande, Lucille Rahnouk, N P Randle, Trevor Ian Robinson, Parul Sharma, Ghada T Shawil, James P Stewart, Neil Swainson, Ecaterina Varnos, Joanne Waits, Mark Whithread |
| EP1_ISL_703694                                                 | Lighthouse Lab in Glasgow                                                                                                                                                                                           | Wellcome Sanger Institute for the COVID-19 Genomics UK (COG-UK) Consortium | Harper VanSteenhouse, Yumi Kasai, Carol Clugston, Anna Dominiczak and Alex Alderton, Roberto Amato, Sonia Goncalves, Ewan Harrison, David K. Jackson, Ian Johnston, Dominic Kwiatkowski, Cordelia Langford, John Sillito on behalf of the Wellcome Sanger Institute COVID-19 Surveillance Team                                                                                                                                                                                                                                                                                                                                                                                      |
| EP1_ISL_703695                                                 | Liverpool Clinical Laboratories                                                                                                                                                                                     | COVID-19 Genomics UK (COG-UK) Consortium                                   | Sam Hadenby, Anila Lucaci, Steve Paterson, Julian Hiscox, Alistair Darby, M Almsaud, A Alrezkhi, Muhammad Alruwaili, Stuart D Armstrong, Jones Benjamin, Eleanor G Bentley, Anu Chawla, Jordan J Clark, Angela Cowell, Richard Eccles, Isabel Garcia-Donval, Matthew Gemmill, Alessandro Gerada, PKF Gilmore, Richard Gregory, Ximeng Han, Catherine Hartley, Margaret Hughes, Mirren Iurriza-Gomara, James Johnson, L Liu, Jennifer Manson, Charlotte Nelson, Elaine O'Toole, Cassie Orladi, Rebekah Penrice-Hande, Lucille Rahnouk, N P Randle, Trevor Ian Robinson, Parul Sharma, Ghada T Shawil, James P Stewart, Neil Swainson, Ecaterina Varnos, Joanne Waits, Mark Whithread |
| EP1_ISL_703696                                                 | Lighthouse Lab in Adeleley Park                                                                                                                                                                                     | Wellcome Sanger Institute for the COVID-19 Genomics UK (COG-UK) Consortium | Jacquelyn Wynn, Mairead Hyland, The Lighthouse Lab in Adeleley Park and Alex Alderton, Roberto Amato, Sonia Goncalves, Ewan Harrison, David K. Jackson, Ian Johnston, Dominic Kwiatkowski, Cordelia Langford, John Sillito on behalf of the Wellcome Sanger Institute COVID-19 Surveillance Team                                                                                                                                                                                                                                                                                                                                                                                    |
| EP1_ISL_703703                                                 | Lighthouse Lab in Glasgow                                                                                                                                                                                           | Wellcome Sanger Institute for the COVID-19 Genomics UK (COG-UK) Consortium | Harper VanSteenhouse, Yumi Kasai, Carol Clugston, Anna Dominiczak and Alex Alderton, Roberto Amato, Sonia Goncalves, Ewan Harrison, David K. Jackson, Ian Johnston, Dominic Kwiatkowski, Cordelia Langford, John Sillito on behalf of the Wellcome Sanger Institute COVID-19 Surveillance Team                                                                                                                                                                                                                                                                                                                                                                                      |
| EP1_ISL_703704                                                 | Northumbria University / South Tees Hospitals NHS Foundation Trust / North Cumbria Integrated Care NHS Foundation Trust / North Tees and Hartlepool NHS Foundation Trust / Newcastle Hospitals NHS Foundation Trust | COVID-19 Genomics UK (COG-UK) Consortium                                   | Darren L Smith, Andrew Nelson, Matthew Bashton, Greg R Young, Joshua Loh, John Allen, Mohammad A Tariq, Giles S Holt, Gary Black, Wen C Yew, Lynn Dover, Paul Baker, Steve Uggell, Sarah Essex, Jane Greenaway, Debra Padgett, Clive Graham, Garren Scott, Edward Barton, Emma Swindells, Brendan Payne, Jennifer Collins, Yusef Taha, Gary Eltringham                                                                                                                                                                                                                                                                                                                              |
| EP1_ISL_703707                                                 | Lighthouse Lab in Adeleley Park                                                                                                                                                                                     | Wellcome Sanger Institute for the COVID-19 Genomics UK (COG-UK) Consortium | Jacquelyn Wynn, Mairead Hyland, The Lighthouse Lab in Adeleley Park and Alex Alderton, Roberto Amato, Sonia Goncalves, Ewan Harrison, David K. Jackson, Ian Johnston, Dominic Kwiatkowski, Cordelia Langford, John Sillito on behalf of the Wellcome Sanger Institute COVID-19 Surveillance Team                                                                                                                                                                                                                                                                                                                                                                                    |
| EP1_ISL_703708                                                 | Department of Pathology, University of Cambridge                                                                                                                                                                    | COVID-19 Genomics UK (COG-UK) Consortium                                   | Annu S. Jahnu, Yasmin Chaudhry, Grant Hall, Iliana Georgina, Myra Hosmillo, Martin D. Curran, Malte Prockert, Surendra Parmar, Ian Goodfellow                                                                                                                                                                                                                                                                                                                                                                                                                                                                                                                                       |
| EP1_ISL_703717, EP1_ISL_703718, EP1_ISL_703719                 | West of Scotland Specialist Virology Centre, NHSGGC / MRC-University of Glasgow Centre for Virus Research                                                                                                           | COVID-19 Genomics UK (COG-UK) Consortium                                   | Ana da Silva Filipe, Natasha Johnson, Kathy Smollett, Daniel Mair, Stephen Carmichael, Alice Boos, Lily Tong, Jenna Nichols, Kyriaki Nomikou, Sarah McDonald, Richard Orton, Joseph Hughes, Steenu Vaidipally, David L Robertson, Alasdair McLean, Rory Gurnson, Sharif Shaaban, Matthew Holden, Rachel Blacow, Guy Mollett, Kathy U, James Shepherd, Antonia Ho, Emma Thomson                                                                                                                                                                                                                                                                                                      |
| EP1_ISL_703727, EP1_ISL_703728                                 | Northumbria University / South Tees Hospitals NHS Foundation Trust / North Cumbria Integrated Care NHS Foundation Trust / Newcastle Hospitals NHS Foundation Trust                                                  | COVID-19 Genomics UK (COG-UK) Consortium                                   | Darren L Smith, Andrew Nelson, Matthew Bashton, Greg R Young, Joshua Loh, John Allen, Mohammad A Tariq, Giles S Holt, Gary Black, Wen C Yew, Lynn Dover, Paul Baker, Steve Uggell, Sarah Essex, Jane Greenaway, Debra Padgett, Clive Graham, Garren Scott, Edward Barton, Emma Swindells, Brendan Payne, Jennifer Collins, Yusef Taha, Gary Eltringham                                                                                                                                                                                                                                                                                                                              |
| EP1_ISL_703729, EP1_ISL_703730, EP1_ISL_703734, EP1_ISL_703735 | Liverpool Clinical Laboratories                                                                                                                                                                                     | COVID-19 Genomics UK (COG-UK) Consortium                                   | Sam Hadenby, Anila Lucaci, Steve Paterson, Julian Hiscox, Alistair Darby, M Almsaud, A Alrezkhi, Muhammad Alruwaili, Stuart D Armstrong, Jones Benjamin, Eleanor G Bentley, Anu Chawla, Jordan J Clark, Angela Cowell, Richard Eccles, Isabel Garcia-Donval, Matthew Gemmill, Alessandro Gerada, PKF Gilmore, Richard Gregory, Ximeng Han, Catherine Hartley, Margaret Hughes, Mirren Iurriza-Gomara, James Johnson, L Liu, Jennifer Manson, Charlotte Nelson, Elaine O'Toole, Cassie Orladi, Rebekah Penrice-Hande, Lucille Rahnouk, N P Randle, Trevor Ian Robinson, Parul Sharma, Ghada T Shawil, James P Stewart, Neil Swainson, Ecaterina Varnos, Joanne Waits, Mark Whithread |
| EP1_ISL_703737                                                 | West of Scotland Specialist Virology Centre, NHSGGC / MRC-University of Glasgow Centre for Virus Research                                                                                                           | COVID-19 Genomics UK (COG-UK) Consortium                                   | Ana da Silva Filipe, Natasha Johnson, Kathy Smollett, Daniel Mair, Stephen Carmichael, Alice Boos, Lily Tong, Jenna Nichols, Kyriaki Nomikou, Sarah McDonald, Richard Orton, Joseph Hughes, Steenu Vaidipally, David L Robertson, Alasdair McLean, Rory Gurnson, Sharif Shaaban, Matthew Holden, Rachel Blacow, Guy Mollett, Kathy U, James Shepherd, Antonia Ho, Emma Thomson                                                                                                                                                                                                                                                                                                      |
| EP1_ISL_703738                                                 | Liverpool Clinical Laboratories                                                                                                                                                                                     | COVID-19 Genomics UK (COG-UK) Consortium                                   | Sam Hadenby, Anila Lucaci, Steve Paterson, Julian Hiscox, Alistair Darby, M Almsaud, A Alrezkhi, Muhammad Alruwaili, Stuart D Armstrong, Jones Benjamin, Eleanor G Bentley, Anu Chawla, Jordan J Clark, Angela Cowell, Richard Eccles, Isabel Garcia-Donval, Matthew Gemmill, Alessandro Gerada, PKF Gilmore, Richard Gregory, Ximeng Han, Catherine Hartley, Margaret Hughes, Mirren Iurriza-Gomara, James Johnson, L Liu, Jennifer Manson, Charlotte Nelson, Elaine O'Toole, Cassie Orladi, Rebekah Penrice-Hande, Lucille Rahnouk, N P Randle, Trevor Ian Robinson, Parul Sharma, Ghada T Shawil, James P Stewart, Neil Swainson, Ecaterina Varnos, Joanne Waits, Mark Whithread |
| EP1_ISL_703741, EP1_ISL_703742                                 | Department of Pathology, University of Cambridge                                                                                                                                                                    | COVID-19 Genomics UK (COG-UK) Consortium                                   | Annu S. Jahnu, Yasmin Chaudhry, Grant Hall, Iliana Georgina, Myra Hosmillo, Martin D. Curran, Malte Prockert, Surendra Parmar, Ian Goodfellow                                                                                                                                                                                                                                                                                                                                                                                                                                                                                                                                       |
| EP1_ISL_703750, EP1_ISL_703752                                 | West of Scotland Specialist Virology Centre, NHSGGC / MRC-University of Glasgow Centre for Virus Research                                                                                                           | COVID-19 Genomics UK (COG-UK) Consortium                                   | Ana da Silva Filipe, Natasha Johnson, Kathy Smollett, Daniel Mair, Stephen Carmichael, Alice Boos, Lily Tong, Jenna Nichols, Kyriaki Nomikou, Sarah McDonald, Richard Orton, Joseph Hughes, Steenu Vaidipally, David L Robertson, Alasdair McLean, Rory Gurnson, Sharif Shaaban, Matthew Holden, Rachel Blacow, Guy Mollett, Kathy U, James Shepherd, Antonia Ho, Emma Thomson                                                                                                                                                                                                                                                                                                      |
| EP1_ISL_703759, EP1_ISL_703762                                 | Liverpool Clinical Laboratories                                                                                                                                                                                     | COVID-19 Genomics UK (COG-UK) Consortium                                   | Sam Hadenby, Anila Lucaci, Steve Paterson, Julian Hiscox, Alistair Darby, M Almsaud, A Alrezkhi, Muhammad Alruwaili, Stuart D Armstrong, Jones Benjamin, Eleanor G Bentley, Anu Chawla, Jordan J Clark, Angela Cowell, Richard Eccles, Isabel Garcia-Donval, Matthew Gemmill, Alessandro Gerada, PKF Gilmore, Richard Gregory, Ximeng Han, Catherine Hartley, Margaret Hughes, Mirren Iurriza-Gomara, James Johnson, L Liu, Jennifer Manson, Charlotte Nelson, Elaine O'Toole, Cassie Orladi, Rebekah Penrice-Hande, Lucille Rahnouk, N P Randle, Trevor Ian Robinson, Parul Sharma, Ghada T Shawil, James P Stewart, Neil Swainson, Ecaterina Varnos, Joanne Waits, Mark Whithread |
| EP1_ISL_703766                                                 | Virology Department, Sheffield Teaching Hospitals NHS Foundation Trust/Department of Infection, Immunity and Cardiovascular Disease, The Medical School, University of Sheffield                                    | COVID-19 Genomics UK (COG-UK) Consortium                                   | Thushan de Silva, Matthew Parker, Nikki Smith, Adri Anygal, Rebecca Brown, Luke Green, Rachel Tucker, Paul Parsons, Danielle Groves, Katie Johnson, Laura Carrilero, Alex Keesley, Dave Partridge, Matthew Wyles, Benjamin Lindsey, Mehmet Yavuz, Mohammed Raza, Carad Evans                                                                                                                                                                                                                                                                                                                                                                                                        |
| EP1_ISL_703770                                                 | Liverpool Clinical Laboratories                                                                                                                                                                                     | COVID-19 Genomics UK (COG-UK) Consortium                                   | Sam Hadenby, Anila Lucaci, Steve Paterson, Julian Hiscox, Alistair Darby, M Almsaud, A Alrezkhi, Muhammad Alruwaili, Stuart D Armstrong, Jones Benjamin, Eleanor G Bentley, Anu Chawla, Jordan J Clark, Angela Cowell, Richard Eccles, Isabel Garcia-Donval, Matthew Gemmill, Alessandro Gerada, PKF Gilmore, Richard Gregory, Ximeng Han, Catherine Hartley, Margaret Hughes, Mirren Iurriza-Gomara, James Johnson, L Liu, Jennifer Manson, Charlotte Nelson, Elaine O'Toole, Cassie Orladi, Rebekah Penrice-Hande, Lucille Rahnouk, N P Randle, Trevor Ian Robinson, Parul Sharma, Ghada T Shawil, James P Stewart, Neil Swainson, Ecaterina Varnos, Joanne Waits, Mark Whithread |
| EP1_ISL_703771                                                 | West of Scotland Specialist Virology Centre, NHSGGC / MRC-University of Glasgow Centre for Virus Research                                                                                                           | COVID-19 Genomics UK (COG-UK) Consortium                                   | Ana da Silva Filipe, Natasha Johnson, Kathy Smollett, Daniel Mair, Stephen Carmichael, Alice Boos, Lily Tong, Jenna Nichols, Kyriaki Nomikou, Sarah McDonald, Richard Orton, Joseph Hughes, Steenu Vaidipally, David L Robertson, Alasdair McLean, Rory Gurnson, Sharif Shaaban, Matthew Holden, Rachel Blacow, Guy Mollett, Kathy U, James Shepherd, Antonia Ho, Emma Thomson                                                                                                                                                                                                                                                                                                      |
| EP1_ISL_703777, EP1_ISL_703778                                 | Lighthouse Lab in Adeleley Park                                                                                                                                                                                     | Wellcome Sanger Institute for the COVID-19 Genomics UK (COG-UK) Consortium | Jacquelyn Wynn, Mairead Hyland, The Lighthouse Lab in Adeleley Park and Alex Alderton, Roberto Amato, Sonia Goncalves, Ewan Harrison, David K. Jackson, Ian Johnston, Dominic Kwiatkowski, Cordelia Langford, John Sillito on behalf of the Wellcome Sanger Institute COVID-19 Surveillance Team                                                                                                                                                                                                                                                                                                                                                                                    |

|                                |                                                                                                                                                                                                 |                                                                            |                                                                                                                                                                                                                                                                                                                                                                                                                                                                                                                                                                                                                                                                                    |
|--------------------------------|-------------------------------------------------------------------------------------------------------------------------------------------------------------------------------------------------|----------------------------------------------------------------------------|------------------------------------------------------------------------------------------------------------------------------------------------------------------------------------------------------------------------------------------------------------------------------------------------------------------------------------------------------------------------------------------------------------------------------------------------------------------------------------------------------------------------------------------------------------------------------------------------------------------------------------------------------------------------------------|
| EPI_ISL_703779                 | Virology Department, Royal Infirmary of Edinburgh, NHS Lothian / School of Biological Sciences, University of Edinburgh / Institute of Genetics and Molecular Medicine, University of Edinburgh | COVID-19 Genomics UK (COG-UK) Consortium                                   | McHugh M, Dewar R, Rooke S, Gallagher M, Balcazza C, O'Toole A, Scher E, Hill V, McCrone JT, Colquhoun R, Yu X, Jackson B, Rambaut A, Williams TC, Templeton K                                                                                                                                                                                                                                                                                                                                                                                                                                                                                                                     |
| EPI_ISL_703780, EPI_ISL_703781 | Lighthouse Lab in Akeley Park                                                                                                                                                                   | Wellcome Sanger Institute for the COVID-19 Genomics UK (COG-UK) Consortium | Jacquelyn Wynn, Mairead Hyland, The Lighthouse Lab in Akeley Park and Alex Alderton, Roberto Amato, Sonia Goncalves, Ewan Harrison, David K Jackson, Ian Johnston, Dominic Kwiatkowski, Cordelia Langford, John Sillito on behalf of the Wellcome Sanger Institute COVID-19 Surveillance Team                                                                                                                                                                                                                                                                                                                                                                                      |
| EPI_ISL_703782, EPI_ISL_703784 | Virology Department, Royal Infirmary of Edinburgh, NHS Lothian / School of Biological Sciences, University of Edinburgh / Institute of Genetics and Molecular Medicine, University of Edinburgh | COVID-19 Genomics UK (COG-UK) Consortium                                   | McHugh M, Dewar R, Rooke S, Gallagher M, Balcazza C, O'Toole A, Scher E, Hill V, McCrone JT, Colquhoun R, Yu X, Jackson B, Rambaut A, Williams TC, Templeton K                                                                                                                                                                                                                                                                                                                                                                                                                                                                                                                     |
| EPI_ISL_703788                 | Lighthouse Lab in Akeley Park                                                                                                                                                                   | Wellcome Sanger Institute for the COVID-19 Genomics UK (COG-UK) Consortium | Jacquelyn Wynn, Mairead Hyland, The Lighthouse Lab in Akeley Park and Alex Alderton, Roberto Amato, Sonia Goncalves, Ewan Harrison, David K Jackson, Ian Johnston, Dominic Kwiatkowski, Cordelia Langford, John Sillito on behalf of the Wellcome Sanger Institute COVID-19 Surveillance Team                                                                                                                                                                                                                                                                                                                                                                                      |
| EPI_ISL_703790                 | Lighthouse Lab in Glasgow                                                                                                                                                                       | Wellcome Sanger Institute for the COVID-19 Genomics UK (COG-UK) Consortium | Happer VanSteerhouse, Yurni Kasai, David Gray, Carol Clugston, Anna Dominiczak and Alex Alderton, Roberto Amato, Sonia Goncalves, Ewan Harrison, David K Jackson, Ian Johnston, Dominic Kwiatkowski, Cordelia Langford, John Sillito on behalf of the Wellcome Sanger Institute COVID-19 Surveillance Team                                                                                                                                                                                                                                                                                                                                                                         |
| EPI_ISL_703791                 | Lighthouse Lab in Akeley Park                                                                                                                                                                   | Wellcome Sanger Institute for the COVID-19 Genomics UK (COG-UK) Consortium | Jacquelyn Wynn, Mairead Hyland, The Lighthouse Lab in Akeley Park and Alex Alderton, Roberto Amato, Sonia Goncalves, Ewan Harrison, David K Jackson, Ian Johnston, Dominic Kwiatkowski, Cordelia Langford, John Sillito on behalf of the Wellcome Sanger Institute COVID-19 Surveillance Team                                                                                                                                                                                                                                                                                                                                                                                      |
| EPI_ISL_703792                 | Queens Medical Centre, Clinical Microbiology Department/ DeepSeq Nottingham                                                                                                                     | COVID-19 Genomics UK (COG-UK) Consortium                                   | Gemma Clark, Wendy Smith, Manjinder Khatkhat, Vicki M Fleming, Michelle M Lister, Hannah Howson-Wells, Jonathan Ball, Patrick McCure, Joseph Chappell, Theodoros Tsolendis, Nadine Holmes, Matthew Carlisle, Christopher Moore, Fel Saeng, Johnny Debebe, Victoria Wright, Matthew Loose                                                                                                                                                                                                                                                                                                                                                                                           |
| EPI_ISL_703793                 | Lighthouse Lab in Akeley Park                                                                                                                                                                   | Wellcome Sanger Institute for the COVID-19 Genomics UK (COG-UK) Consortium | Jacquelyn Wynn, Mairead Hyland, The Lighthouse Lab in Akeley Park and Alex Alderton, Roberto Amato, Sonia Goncalves, Ewan Harrison, David K Jackson, Ian Johnston, Dominic Kwiatkowski, Cordelia Langford, John Sillito on behalf of the Wellcome Sanger Institute COVID-19 Surveillance Team                                                                                                                                                                                                                                                                                                                                                                                      |
| EPI_ISL_703794                 | Queens Medical Centre, Clinical Microbiology Department/ DeepSeq Nottingham                                                                                                                     | COVID-19 Genomics UK (COG-UK) Consortium                                   | Gemma Clark, Wendy Smith, Manjinder Khatkhat, Vicki M Fleming, Michelle M Lister, Hannah Howson-Wells, Jonathan Ball, Patrick McCure, Joseph Chappell, Theodoros Tsolendis, Nadine Holmes, Matthew Carlisle, Christopher Moore, Fel Saeng, Johnny Debebe, Victoria Wright, Matthew Loose                                                                                                                                                                                                                                                                                                                                                                                           |
| EPI_ISL_703796, EPI_ISL_703798 | Lighthouse Lab in Akeley Park                                                                                                                                                                   | Wellcome Sanger Institute for the COVID-19 Genomics UK (COG-UK) Consortium | Jacquelyn Wynn, Mairead Hyland, The Lighthouse Lab in Akeley Park and Alex Alderton, Roberto Amato, Sonia Goncalves, Ewan Harrison, David K Jackson, Ian Johnston, Dominic Kwiatkowski, Cordelia Langford, John Sillito on behalf of the Wellcome Sanger Institute COVID-19 Surveillance Team                                                                                                                                                                                                                                                                                                                                                                                      |
| EPI_ISL_703799, EPI_ISL_703801 | Lighthouse Lab in Glasgow                                                                                                                                                                       | Wellcome Sanger Institute for the COVID-19 Genomics UK (COG-UK) Consortium | Happer VanSteerhouse, Yurni Kasai, David Gray, Carol Clugston, Anna Dominiczak and Alex Alderton, Roberto Amato, Sonia Goncalves, Ewan Harrison, David K Jackson, Ian Johnston, Dominic Kwiatkowski, Cordelia Langford, John Sillito on behalf of the Wellcome Sanger Institute COVID-19 Surveillance Team                                                                                                                                                                                                                                                                                                                                                                         |
| EPI_ISL_703803, EPI_ISL_703804 | Lighthouse Lab in Akeley Park                                                                                                                                                                   | Wellcome Sanger Institute for the COVID-19 Genomics UK (COG-UK) Consortium | Jacquelyn Wynn, Mairead Hyland, The Lighthouse Lab in Akeley Park and Alex Alderton, Roberto Amato, Sonia Goncalves, Ewan Harrison, David K Jackson, Ian Johnston, Dominic Kwiatkowski, Cordelia Langford, John Sillito on behalf of the Wellcome Sanger Institute COVID-19 Surveillance Team                                                                                                                                                                                                                                                                                                                                                                                      |
| EPI_ISL_703806                 | Lighthouse Lab in Glasgow                                                                                                                                                                       | Wellcome Sanger Institute for the COVID-19 Genomics UK (COG-UK) Consortium | Happer VanSteerhouse, Yurni Kasai, David Gray, Carol Clugston, Anna Dominiczak and Alex Alderton, Roberto Amato, Sonia Goncalves, Ewan Harrison, David K Jackson, Ian Johnston, Dominic Kwiatkowski, Cordelia Langford, John Sillito on behalf of the Wellcome Sanger Institute COVID-19 Surveillance Team                                                                                                                                                                                                                                                                                                                                                                         |
| EPI_ISL_703809                 | Lighthouse Lab in Akeley Park                                                                                                                                                                   | Wellcome Sanger Institute for the COVID-19 Genomics UK (COG-UK) Consortium | Jacquelyn Wynn, Mairead Hyland, The Lighthouse Lab in Akeley Park and Alex Alderton, Roberto Amato, Sonia Goncalves, Ewan Harrison, David K Jackson, Ian Johnston, Dominic Kwiatkowski, Cordelia Langford, John Sillito on behalf of the Wellcome Sanger Institute COVID-19 Surveillance Team                                                                                                                                                                                                                                                                                                                                                                                      |
| EPI_ISL_703810, EPI_ISL_703813 | Virology Department, Royal Infirmary of Edinburgh, NHS Lothian / School of Biological Sciences, University of Edinburgh / Institute of Genetics and Molecular Medicine, University of Edinburgh | COVID-19 Genomics UK (COG-UK) Consortium                                   | McHugh M, Dewar R, Rooke S, Gallagher M, Balcazza C, O'Toole A, Scher E, Hill V, McCrone JT, Colquhoun R, Yu X, Jackson B, Rambaut A, Williams TC, Templeton K                                                                                                                                                                                                                                                                                                                                                                                                                                                                                                                     |
| EPI_ISL_703815                 | Liverpool Clinical Laboratories                                                                                                                                                                 | COVID-19 Genomics UK (COG-UK) Consortium                                   | Sam Hadenby, Anita Luczad, Steve Paterson, Julian Hiscox, Alistair Darty, M Almsaud, A Alvezali, Muhammad Alruwaili, Stuart D Armstrong, Jones Benjamin, Eleanor G Bentley, Anu Chawla, Jordan J Clark, Angela Cowell, Richard Eccles, Isabel Garcia-Donval, Matthew Gemmill, Alessandro Gerada, PKF Gilmore, Richard Gregory, Ximeng Han, Catherine Hartley, Margaret Hughes, Miran Jurzica-Gomara, James Johnson, L Liu, Jennifer Manson, Charlotte Nelson, Elaine O'Toole, Cassie Orlady, Rebekah Penrice-Handel, Lucille Rahnov, N P Randle, Trevor Ian Robinson, Parul Sharma, Ghada T Shawli, James P Stewart, Neil Swainston, Ecaterina Varnos, Joanne Wats, Mark Whitehead |
| EPI_ISL_703816                 | Lighthouse Lab in Glasgow                                                                                                                                                                       | Wellcome Sanger Institute for the COVID-19 Genomics UK (COG-UK) Consortium | Happer VanSteerhouse, Yurni Kasai, David Gray, Carol Clugston, Anna Dominiczak and Alex Alderton, Roberto Amato, Sonia Goncalves, Ewan Harrison, David K Jackson, Ian Johnston, Dominic Kwiatkowski, Cordelia Langford, John Sillito on behalf of the Wellcome Sanger Institute COVID-19 Surveillance Team                                                                                                                                                                                                                                                                                                                                                                         |
| EPI_ISL_703818                 | Liverpool Clinical Laboratories                                                                                                                                                                 | COVID-19 Genomics UK (COG-UK) Consortium                                   | Sam Hadenby, Anita Luczad, Steve Paterson, Julian Hiscox, Alistair Darty, M Almsaud, A Alvezali, Muhammad Alruwaili, Stuart D Armstrong, Jones Benjamin, Eleanor G Bentley, Anu Chawla, Jordan J Clark, Angela Cowell, Richard Eccles, Isabel Garcia-Donval, Matthew Gemmill, Alessandro Gerada, PKF Gilmore, Richard Gregory, Ximeng Han, Catherine Hartley, Margaret Hughes, Miran Jurzica-Gomara, James Johnson, L Liu, Jennifer Manson, Charlotte Nelson, Elaine O'Toole, Cassie Orlady, Rebekah Penrice-Handel, Lucille Rahnov, N P Randle, Trevor Ian Robinson, Parul Sharma, Ghada T Shawli, James P Stewart, Neil Swainston, Ecaterina Varnos, Joanne Wats, Mark Whitehead |
| EPI_ISL_703819, EPI_ISL_703822 | Lighthouse Lab in Glasgow                                                                                                                                                                       | Wellcome Sanger Institute for the COVID-19 Genomics UK (COG-UK) Consortium | Happer VanSteerhouse, Yurni Kasai, David Gray, Carol Clugston, Anna Dominiczak and Alex Alderton, Roberto Amato, Sonia Goncalves, Ewan Harrison, David K Jackson, Ian Johnston, Dominic Kwiatkowski, Cordelia Langford, John Sillito on behalf of the Wellcome Sanger Institute COVID-19 Surveillance Team                                                                                                                                                                                                                                                                                                                                                                         |
| EPI_ISL_703823                 | Liverpool Clinical Laboratories                                                                                                                                                                 | COVID-19 Genomics UK (COG-UK) Consortium                                   | Sam Hadenby, Anita Luczad, Steve Paterson, Julian Hiscox, Alistair Darty, M Almsaud, A Alvezali, Muhammad Alruwaili, Stuart D Armstrong, Jones Benjamin, Eleanor G Bentley, Anu Chawla, Jordan J Clark, Angela Cowell, Richard Eccles, Isabel Garcia-Donval, Matthew Gemmill, Alessandro Gerada, PKF Gilmore, Richard Gregory, Ximeng Han, Catherine Hartley, Margaret Hughes, Miran Jurzica-Gomara, James Johnson, L Liu, Jennifer Manson, Charlotte Nelson, Elaine O'Toole, Cassie Orlady, Rebekah Penrice-Handel, Lucille Rahnov, N P Randle, Trevor Ian Robinson, Parul Sharma, Ghada T Shawli, James P Stewart, Neil Swainston, Ecaterina Varnos, Joanne Wats, Mark Whitehead |
| EPI_ISL_703825, EPI_ISL_703827 | Lighthouse Lab in Glasgow                                                                                                                                                                       | Wellcome Sanger Institute for the COVID-19 Genomics UK (COG-UK) Consortium | Happer VanSteerhouse, Yurni Kasai, David Gray, Carol Clugston, Anna Dominiczak and Alex Alderton, Roberto Amato, Sonia Goncalves, Ewan Harrison, David K Jackson, Ian Johnston, Dominic Kwiatkowski, Cordelia Langford, John Sillito on behalf of the Wellcome Sanger Institute COVID-19 Surveillance Team                                                                                                                                                                                                                                                                                                                                                                         |
| EPI_ISL_703829, EPI_ISL_703831 | West of Scotland Specialist Virology Centre, NHSGGC / MRC-University of Glasgow Centre for Virus Research                                                                                       | COVID-19 Genomics UK (COG-UK) Consortium                                   | Ana da Silva Filipe, Natasha Johnson, Kathy Snoddy, Daniel Mair, Stephen Carmichael, Alice Boos, Lily Tong, Janna Nichols, Kyriaki Nomikou, Sarah McDonald, Richard Orton, Joseph Hughes, Steven Vaitheelilly, David L Robertson, Alasdair MacLellan, Rory Gunson, Sharif Shaaban, Matthew Holden, Rachel Bascow, Guy Mollath, Kathy U, James Shepherd, Antonia Ho, Emma Thomson                                                                                                                                                                                                                                                                                                   |
| EPI_ISL_703833                 | Lighthouse Lab in Glasgow                                                                                                                                                                       | Wellcome Sanger Institute for the COVID-19 Genomics UK (COG-UK) Consortium | Happer VanSteerhouse, Yurni Kasai, David Gray, Carol Clugston, Anna Dominiczak and Alex Alderton, Roberto Amato, Sonia Goncalves, Ewan Harrison, David K Jackson, Ian Johnston, Dominic Kwiatkowski, Cordelia Langford, John Sillito on behalf of the Wellcome Sanger Institute COVID-19 Surveillance Team                                                                                                                                                                                                                                                                                                                                                                         |
| EPI_ISL_703834                 | West of Scotland Specialist Virology Centre, NHSGGC / MRC-University of Glasgow Centre for Virus Research                                                                                       | COVID-19 Genomics UK (COG-UK) Consortium                                   | Ana da Silva Filipe, Natasha Johnson, Kathy Snoddy, Daniel Mair, Stephen Carmichael, Alice Boos, Lily Tong, Janna Nichols, Kyriaki Nomikou, Sarah McDonald, Richard Orton, Joseph Hughes, Steven Vaitheelilly, David L Robertson, Alasdair MacLellan, Rory Gunson, Sharif Shaaban, Matthew Holden, Rachel Bascow, Guy Mollath, Kathy U, James Shepherd, Antonia Ho, Emma Thomson                                                                                                                                                                                                                                                                                                   |
| EPI_ISL_703835, EPI_ISL_703836 | Lighthouse Lab in Glasgow                                                                                                                                                                       | Wellcome Sanger Institute for the COVID-19 Genomics UK (COG-UK) Consortium | Happer VanSteerhouse, Yurni Kasai, David Gray, Carol Clugston, Anna Dominiczak and Alex Alderton, Roberto Amato, Sonia Goncalves, Ewan Harrison, David K Jackson, Ian Johnston, Dominic Kwiatkowski, Cordelia Langford, John Sillito on behalf of the Wellcome Sanger Institute COVID-19 Surveillance Team                                                                                                                                                                                                                                                                                                                                                                         |

|                                                                                                                                |                                                                                                           |                                                                            |                                                                                                                                                                                                                                                                                                                                                                                                                                                                                                                                                                                                                                                                                      |
|--------------------------------------------------------------------------------------------------------------------------------|-----------------------------------------------------------------------------------------------------------|----------------------------------------------------------------------------|--------------------------------------------------------------------------------------------------------------------------------------------------------------------------------------------------------------------------------------------------------------------------------------------------------------------------------------------------------------------------------------------------------------------------------------------------------------------------------------------------------------------------------------------------------------------------------------------------------------------------------------------------------------------------------------|
| EPI_ISL_703837                                                                                                                 | West of Scotland Specialist Virology Centre, NHSGGC / MRC-University of Glasgow Centre for Virus Research | COVID-19 Genomics UK (COG-UK) Consortium                                   | Ana da Silva Filipe, Natasha Johnson, Kathy Snollett, Daniel Mair, Stephen Carmichael, Alice Brooks, Lily Tong, Jenna Nichols, Kyriaki Nomioku, Sarah McDonald, Richard Orton, Joseph Hughes, Steen Vahlfabell, David L Robertson, Alasdair MacLean, Rory Gurnson, Sharif Shaaban, Matthew Holden, Rachel Blacow, Guy Mollath, Kathy U, James Shepherd, Antonia Ho, Emma Thomson                                                                                                                                                                                                                                                                                                     |
| EPI_ISL_703838                                                                                                                 | Lighthouse Lab in Glasgow                                                                                 | Wellcome Sanger Institute for the COVID-19 Genomics UK (COG-UK) Consortium | Harper VanSteerthouse, Yurni Kasai, Carol Clugston, Anna Dominiczak and Alex Alderton, Roberto Amato, Sonia Goncalves, Ewan Harrison, David K, Jackson, Ian Johnston, Dominic Kwiatkowski, Cordella Langford, John Sillitoe on behalf of the Wellcome Sanger Institute COVID-19 Surveillance Team                                                                                                                                                                                                                                                                                                                                                                                    |
| EPI_ISL_703839                                                                                                                 | West of Scotland Specialist Virology Centre, NHSGGC / MRC-University of Glasgow Centre for Virus Research | COVID-19 Genomics UK (COG-UK) Consortium                                   | Ana da Silva Filipe, Natasha Johnson, Kathy Snollett, Daniel Mair, Stephen Carmichael, Alice Brooks, Lily Tong, Jenna Nichols, Kyriaki Nomioku, Sarah McDonald, Richard Orton, Joseph Hughes, Steen Vahlfabell, David L Robertson, Alasdair MacLean, Rory Gurnson, Sharif Shaaban, Matthew Holden, Rachel Blacow, Guy Mollath, Kathy U, James Shepherd, Antonia Ho, Emma Thomson                                                                                                                                                                                                                                                                                                     |
| EPI_ISL_703840, EPI_ISL_703841                                                                                                 | Lighthouse Lab in Glasgow                                                                                 | Wellcome Sanger Institute for the COVID-19 Genomics UK (COG-UK) Consortium | Harper VanSteerthouse, Yurni Kasai, Carol Clugston, Anna Dominiczak and Alex Alderton, Roberto Amato, Sonia Goncalves, Ewan Harrison, David K, Jackson, Ian Johnston, Dominic Kwiatkowski, Cordella Langford, John Sillitoe on behalf of the Wellcome Sanger Institute COVID-19 Surveillance Team                                                                                                                                                                                                                                                                                                                                                                                    |
| EPI_ISL_703842                                                                                                                 | West of Scotland Specialist Virology Centre, NHSGGC / MRC-University of Glasgow Centre for Virus Research | COVID-19 Genomics UK (COG-UK) Consortium                                   | Ana da Silva Filipe, Natasha Johnson, Kathy Snollett, Daniel Mair, Stephen Carmichael, Alice Brooks, Lily Tong, Jenna Nichols, Kyriaki Nomioku, Sarah McDonald, Richard Orton, Joseph Hughes, Steen Vahlfabell, David L Robertson, Alasdair MacLean, Rory Gurnson, Sharif Shaaban, Matthew Holden, Rachel Blacow, Guy Mollath, Kathy U, James Shepherd, Antonia Ho, Emma Thomson                                                                                                                                                                                                                                                                                                     |
| EPI_ISL_703844                                                                                                                 | Lighthouse Lab in Glasgow                                                                                 | Wellcome Sanger Institute for the COVID-19 Genomics UK (COG-UK) Consortium | Harper VanSteerthouse, Yurni Kasai, Carol Clugston, Anna Dominiczak and Alex Alderton, Roberto Amato, Sonia Goncalves, Ewan Harrison, David K, Jackson, Ian Johnston, Dominic Kwiatkowski, Cordella Langford, John Sillitoe on behalf of the Wellcome Sanger Institute COVID-19 Surveillance Team                                                                                                                                                                                                                                                                                                                                                                                    |
| EPI_ISL_703845                                                                                                                 | West of Scotland Specialist Virology Centre, NHSGGC / MRC-University of Glasgow Centre for Virus Research | COVID-19 Genomics UK (COG-UK) Consortium                                   | Ana da Silva Filipe, Natasha Johnson, Kathy Snollett, Daniel Mair, Stephen Carmichael, Alice Brooks, Lily Tong, Jenna Nichols, Kyriaki Nomioku, Sarah McDonald, Richard Orton, Joseph Hughes, Steen Vahlfabell, David L Robertson, Alasdair MacLean, Rory Gurnson, Sharif Shaaban, Matthew Holden, Rachel Blacow, Guy Mollath, Kathy U, James Shepherd, Antonia Ho, Emma Thomson                                                                                                                                                                                                                                                                                                     |
| EPI_ISL_703846                                                                                                                 | Lighthouse Lab in Glasgow                                                                                 | Wellcome Sanger Institute for the COVID-19 Genomics UK (COG-UK) Consortium | Harper VanSteerthouse, Yurni Kasai, Carol Clugston, Anna Dominiczak and Alex Alderton, Roberto Amato, Sonia Goncalves, Ewan Harrison, David K, Jackson, Ian Johnston, Dominic Kwiatkowski, Cordella Langford, John Sillitoe on behalf of the Wellcome Sanger Institute COVID-19 Surveillance Team                                                                                                                                                                                                                                                                                                                                                                                    |
| EPI_ISL_703847                                                                                                                 | Liverpool Clinical Laboratories                                                                           | COVID-19 Genomics UK (COG-UK) Consortium                                   | Sam Haddenby, Anita Luczai, Steve Paterson, Julian Hiscox, Alistair Darby, M Almsaud, A Alvezahi, Muhannad Alruwaili, Stuart D Armstrong, Jones Benjamin, Eleanor G Bentley, Anu Chawla, Jordan J Clark, Angela Cowell, Richard Eccles, Isabel Garcia-Dornal, Matthew Gemmel, Alessandro Gerada, PKF Gilmore, Richard Gregory, Ximeng Han, Catherine Hartley, Margaret Hughes, Miran Iurriza-Gomara, James Johnson, L L Liu, Jennifer Manson, Charlotte Nelson, Elaine O'Toole, Cassie Orlady, Rebekah Penrice-Handel, Lucile Rahnouy, N P Randle, Trevor Ian Robinson, Parul Sharma, Ghada T Shawil, James P Stewart, Neil Swainston, Ecaterina Vamos, Joanne Waihs, Mark Whithread |
| EPI_ISL_703849                                                                                                                 | Lighthouse Lab in Glasgow                                                                                 | Wellcome Sanger Institute for the COVID-19 Genomics UK (COG-UK) Consortium | Harper VanSteerthouse, Yurni Kasai, Carol Clugston, Anna Dominiczak and Alex Alderton, Roberto Amato, Sonia Goncalves, Ewan Harrison, David K, Jackson, Ian Johnston, Dominic Kwiatkowski, Cordella Langford, John Sillitoe on behalf of the Wellcome Sanger Institute COVID-19 Surveillance Team                                                                                                                                                                                                                                                                                                                                                                                    |
| EPI_ISL_703850                                                                                                                 | Liverpool Clinical Laboratories                                                                           | COVID-19 Genomics UK (COG-UK) Consortium                                   | Sam Haddenby, Anita Luczai, Steve Paterson, Julian Hiscox, Alistair Darby, M Almsaud, A Alvezahi, Muhannad Alruwaili, Stuart D Armstrong, Jones Benjamin, Eleanor G Bentley, Anu Chawla, Jordan J Clark, Angela Cowell, Richard Eccles, Isabel Garcia-Dornal, Matthew Gemmel, Alessandro Gerada, PKF Gilmore, Richard Gregory, Ximeng Han, Catherine Hartley, Margaret Hughes, Miran Iurriza-Gomara, James Johnson, L L Liu, Jennifer Manson, Charlotte Nelson, Elaine O'Toole, Cassie Orlady, Rebekah Penrice-Handel, Lucile Rahnouy, N P Randle, Trevor Ian Robinson, Parul Sharma, Ghada T Shawil, James P Stewart, Neil Swainston, Ecaterina Vamos, Joanne Waihs, Mark Whithread |
| EPI_ISL_703852, EPI_ISL_703854                                                                                                 | Lighthouse Lab in Glasgow                                                                                 | Wellcome Sanger Institute for the COVID-19 Genomics UK (COG-UK) Consortium | Harper VanSteerthouse, Yurni Kasai, Carol Clugston, Anna Dominiczak and Alex Alderton, Roberto Amato, Sonia Goncalves, Ewan Harrison, David K, Jackson, Ian Johnston, Dominic Kwiatkowski, Cordella Langford, John Sillitoe on behalf of the Wellcome Sanger Institute COVID-19 Surveillance Team                                                                                                                                                                                                                                                                                                                                                                                    |
| EPI_ISL_703855                                                                                                                 | Wales Specialist Virology Centre Sequencing Lab: Pathogen Genomics Unit                                   | COVID-19 Genomics UK (COG-UK) Consortium                                   | Catherine Moore, Johnathan Evans, Laura Gifford, Malorie Perry, Simon Cottrell, Angela Marchbank, Alec Birchley, Alexander Adams, Amy Gaskin, Bree Gatica-Wilcox, Jason Coombes, Joel Southgate, Lauren Gilbert, Lee Graham, Nicole Paschianini, Sara Kunzrzens-Sumnerhays, Sarah Taylor, Sophie Jones, Sara Hay, Matthew Bull, Joanne Watkins, Sally Cordein, Tom Connor                                                                                                                                                                                                                                                                                                            |
| EPI_ISL_703857, EPI_ISL_703864, EPI_ISL_703866, EPI_ISL_703867, EPI_ISL_703871, EPI_ISL_703877                                 | Lighthouse Lab in Glasgow                                                                                 | Wellcome Sanger Institute for the COVID-19 Genomics UK (COG-UK) Consortium | Harper VanSteerthouse, Yurni Kasai, David Gray, Carol Clugston, Anna Dominiczak and Alex Alderton, Roberto Amato, Sonia Goncalves, Ewan Harrison, David K, Jackson, Ian Johnston, Dominic Kwiatkowski, Cordella Langford, John Sillitoe on behalf of the Wellcome Sanger Institute COVID-19 Surveillance Team                                                                                                                                                                                                                                                                                                                                                                        |
| EPI_ISL_703884                                                                                                                 | Liverpool Clinical Laboratories                                                                           | COVID-19 Genomics UK (COG-UK) Consortium                                   | Sam Haddenby, Anita Luczai, Steve Paterson, Julian Hiscox, Alistair Darby, M Almsaud, A Alvezahi, Muhannad Alruwaili, Stuart D Armstrong, Jones Benjamin, Eleanor G Bentley, Anu Chawla, Jordan J Clark, Angela Cowell, Richard Eccles, Isabel Garcia-Dornal, Matthew Gemmel, Alessandro Gerada, PKF Gilmore, Richard Gregory, Ximeng Han, Catherine Hartley, Margaret Hughes, Miran Iurriza-Gomara, James Johnson, L L Liu, Jennifer Manson, Charlotte Nelson, Elaine O'Toole, Cassie Orlady, Rebekah Penrice-Handel, Lucile Rahnouy, N P Randle, Trevor Ian Robinson, Parul Sharma, Ghada T Shawil, James P Stewart, Neil Swainston, Ecaterina Vamos, Joanne Waihs, Mark Whithread |
| EPI_ISL_703885, EPI_ISL_703890, EPI_ISL_703892, EPI_ISL_703893, EPI_ISL_703896, EPI_ISL_703900, EPI_ISL_703901, EPI_ISL_703906 | Lighthouse Lab in Glasgow                                                                                 | Wellcome Sanger Institute for the COVID-19 Genomics UK (COG-UK) Consortium | Harper VanSteerthouse, Yurni Kasai, David Gray, Carol Clugston, Anna Dominiczak and Alex Alderton, Roberto Amato, Sonia Goncalves, Ewan Harrison, David K, Jackson, Ian Johnston, Dominic Kwiatkowski, Cordella Langford, John Sillitoe on behalf of the Wellcome Sanger Institute COVID-19 Surveillance Team                                                                                                                                                                                                                                                                                                                                                                        |
| EPI_ISL_703911                                                                                                                 | West of Scotland Specialist Virology Centre, NHSGGC / MRC-University of Glasgow Centre for Virus Research | COVID-19 Genomics UK (COG-UK) Consortium                                   | Ana da Silva Filipe, Natasha Johnson, Kathy Snollett, Daniel Mair, Stephen Carmichael, Alice Brooks, Lily Tong, Jenna Nichols, Kyriaki Nomioku, Sarah McDonald, Richard Orton, Joseph Hughes, Steen Vahlfabell, David L Robertson, Alasdair MacLean, Rory Gurnson, Sharif Shaaban, Matthew Holden, Rachel Blacow, Guy Mollath, Kathy U, James Shepherd, Antonia Ho, Emma Thomson                                                                                                                                                                                                                                                                                                     |
| EPI_ISL_703913                                                                                                                 | Liverpool Clinical Laboratories                                                                           | COVID-19 Genomics UK (COG-UK) Consortium                                   | Sam Haddenby, Anita Luczai, Steve Paterson, Julian Hiscox, Alistair Darby, M Almsaud, A Alvezahi, Muhannad Alruwaili, Stuart D Armstrong, Jones Benjamin, Eleanor G Bentley, Anu Chawla, Jordan J Clark, Angela Cowell, Richard Eccles, Isabel Garcia-Dornal, Matthew Gemmel, Alessandro Gerada, PKF Gilmore, Richard Gregory, Ximeng Han, Catherine Hartley, Margaret Hughes, Miran Iurriza-Gomara, James Johnson, L L Liu, Jennifer Manson, Charlotte Nelson, Elaine O'Toole, Cassie Orlady, Rebekah Penrice-Handel, Lucile Rahnouy, N P Randle, Trevor Ian Robinson, Parul Sharma, Ghada T Shawil, James P Stewart, Neil Swainston, Ecaterina Vamos, Joanne Waihs, Mark Whithread |
| EPI_ISL_703914, EPI_ISL_703915                                                                                                 | Lighthouse Lab in Glasgow                                                                                 | Wellcome Sanger Institute for the COVID-19 Genomics UK (COG-UK) Consortium | Harper VanSteerthouse, Yurni Kasai, David Gray, Carol Clugston, Anna Dominiczak and Alex Alderton, Roberto Amato, Sonia Goncalves, Ewan Harrison, David K, Jackson, Ian Johnston, Dominic Kwiatkowski, Cordella Langford, John Sillitoe on behalf of the Wellcome Sanger Institute COVID-19 Surveillance Team                                                                                                                                                                                                                                                                                                                                                                        |
| EPI_ISL_703916                                                                                                                 | Liverpool Clinical Laboratories                                                                           | COVID-19 Genomics UK (COG-UK) Consortium                                   | Sam Haddenby, Anita Luczai, Steve Paterson, Julian Hiscox, Alistair Darby, M Almsaud, A Alvezahi, Muhannad Alruwaili, Stuart D Armstrong, Jones Benjamin, Eleanor G Bentley, Anu Chawla, Jordan J Clark, Angela Cowell, Richard Eccles, Isabel Garcia-Dornal, Matthew Gemmel, Alessandro Gerada, PKF Gilmore, Richard Gregory, Ximeng Han, Catherine Hartley, Margaret Hughes, Miran Iurriza-Gomara, James Johnson, L L Liu, Jennifer Manson, Charlotte Nelson, Elaine O'Toole, Cassie Orlady, Rebekah Penrice-Handel, Lucile Rahnouy, N P Randle, Trevor Ian Robinson, Parul Sharma, Ghada T Shawil, James P Stewart, Neil Swainston, Ecaterina Vamos, Joanne Waihs, Mark Whithread |
| EPI_ISL_703917                                                                                                                 | Lighthouse Lab in Glasgow                                                                                 | Wellcome Sanger Institute for the COVID-19 Genomics UK (COG-UK) Consortium | Harper VanSteerthouse, Yurni Kasai, David Gray, Carol Clugston, Anna Dominiczak and Alex Alderton, Roberto Amato, Sonia Goncalves, Ewan Harrison, David K, Jackson, Ian Johnston, Dominic Kwiatkowski, Cordella Langford, John Sillitoe on behalf of the Wellcome Sanger Institute COVID-19 Surveillance Team                                                                                                                                                                                                                                                                                                                                                                        |
| EPI_ISL_703918                                                                                                                 | Wales Specialist Virology Centre Sequencing Lab: Pathogen Genomics Unit                                   | COVID-19 Genomics UK (COG-UK) Consortium                                   | Catherine Moore, Johnathan Evans, Laura Gifford, Malorie Perry, Simon Cottrell, Angela Marchbank, Alec Birchley, Alexander Adams, Amy Gaskin, Bree Gatica-Wilcox, Jason Coombes, Joel Southgate, Lauren Gilbert, Lee Graham, Nicole Paschianini, Sara Kunzrzens-Sumnerhays, Sarah Taylor, Sophie Jones, Sara Hay, Matthew Bull, Joanne Watkins, Sally Cordein, Tom Connor                                                                                                                                                                                                                                                                                                            |

|                                                                                                                |                                                                                                                                                                                               |                                                                            |                                                                                                                                                                                                                                                                                                                                                                                                                                                                                                                                                                                                                                                                                    |
|----------------------------------------------------------------------------------------------------------------|-----------------------------------------------------------------------------------------------------------------------------------------------------------------------------------------------|----------------------------------------------------------------------------|------------------------------------------------------------------------------------------------------------------------------------------------------------------------------------------------------------------------------------------------------------------------------------------------------------------------------------------------------------------------------------------------------------------------------------------------------------------------------------------------------------------------------------------------------------------------------------------------------------------------------------------------------------------------------------|
| EP1_ISL_703920, EP1_ISL_703922                                                                                 | Lighthouse Lab in Glasgow                                                                                                                                                                     | Wellcome Sanger Institute for the COVID-19 Genomics UK (COG-UK) Consortium | Haper VanSteenhouse, Yurni Kasai, Carol Clugston, Anna Dominiczak and Alex Alderton, Roberto Amato, Sonia Goncalves, Ewan Harrison, David K. Jackson, Ian Johnston, Dominic Kwiatkowski, Cordelia Langford, John Sillitoe on behalf of the Wellcome Sanger Institute COVID-19 Surveillance Team                                                                                                                                                                                                                                                                                                                                                                                    |
| EP1_ISL_703924                                                                                                 | West of Scotland Specialist Virology Centre, NHSGCG / MRC-University of Glasgow Centre for Virus Research                                                                                     | COVID-19 Genomics UK (COG-UK) Consortium                                   | Ana da Silva Filipe, Natasha Johnson, Kathy Smollett, Daniel Mair, Stephen Carmichael, Alice Boos, Lily Tong, Jenna Nichols, Kyriaki Nomiokou, Sarah McDonald, Richard Orton, Joseph Hughes, Steenu Vaidipally, David L Robertson, Alasdair McLean, Rory Gunson, Sharif Shaaban, Matthew Holden, Rachel Blacow, Guy Mollett, Kathy U, James Shepherd, Anthony Ho, Emma Thomson                                                                                                                                                                                                                                                                                                     |
| EP1_ISL_703925                                                                                                 | Lighthouse Lab in Glasgow                                                                                                                                                                     | Wellcome Sanger Institute for the COVID-19 Genomics UK (COG-UK) Consortium | Haper VanSteenhouse, Yurni Kasai, David Gray, Carol Clugston, Anna Dominiczak and Alex Alderton, Roberto Amato, Sonia Goncalves, Ewan Harrison, David K. Jackson, Ian Johnston, Dominic Kwiatkowski, Cordelia Langford, John Sillitoe on behalf of the Wellcome Sanger Institute COVID-19 Surveillance Team                                                                                                                                                                                                                                                                                                                                                                        |
| EP1_ISL_703927                                                                                                 | West of Scotland Specialist Virology Centre, NHSGCG / MRC-University of Glasgow Centre for Virus Research                                                                                     | COVID-19 Genomics UK (COG-UK) Consortium                                   | Ana da Silva Filipe, Natasha Johnson, Kathy Smollett, Daniel Mair, Stephen Carmichael, Alice Boos, Lily Tong, Jenna Nichols, Kyriaki Nomiokou, Sarah McDonald, Richard Orton, Joseph Hughes, Steenu Vaidipally, David L Robertson, Alasdair McLean, Rory Gunson, Sharif Shaaban, Matthew Holden, Rachel Blacow, Guy Mollett, Kathy U, James Shepherd, Anthony Ho, Emma Thomson                                                                                                                                                                                                                                                                                                     |
| EP1_ISL_703930, EP1_ISL_703931, EP1_ISL_703934, EP1_ISL_703936                                                 | Lighthouse Lab in Glasgow                                                                                                                                                                     | Wellcome Sanger Institute for the COVID-19 Genomics UK (COG-UK) Consortium | Haper VanSteenhouse, Yurni Kasai, David Gray, Carol Clugston, Anna Dominiczak and Alex Alderton, Roberto Amato, Sonia Goncalves, Ewan Harrison, David K. Jackson, Ian Johnston, Dominic Kwiatkowski, Cordelia Langford, John Sillitoe on behalf of the Wellcome Sanger Institute COVID-19 Surveillance Team                                                                                                                                                                                                                                                                                                                                                                        |
| EP1_ISL_703937                                                                                                 | Liverpool Clinical Laboratories                                                                                                                                                               | COVID-19 Genomics UK (COG-UK) Consortium                                   | Sam Hadenby, Anita Luczad, Steve Paterson, Julian Hiscox, Alistair Dardy, M Aimsaud, A Alvezahli, Muhammad Atruwail, Stuart D Armstrong, Jones Benjamin, Eleanor G Bentley, Anu Charwa, Jordan J Clark, Angela Cowell, Richard Eccles, Isabel Garcia-Donval, Matthew Gemmill, Alessandro Gerada, PKF Gilmore, Richard Gregory, Ximeng Han, Catherine Hartley, Margaret Hughes, Miran Turzija-Gomara, James Johnson, L Liu, Jennifer Manson, Charlotte Nelson, Elaine O'Toole, Cassie Orlaigh, Rebekah Penrice-Handel, Lucille Rahnov, N P Randle, Trevor Ian Robinson, Parul Sharma, Ghada T Shawli, James P Stewart, Neil Swainson, Ecaterina Varnos, Joanne Wats, Mark Whitehead |
| EP1_ISL_703938, EP1_ISL_703939, EP1_ISL_703941, EP1_ISL_703943, EP1_ISL_703944, EP1_ISL_703946, EP1_ISL_703949 | Lighthouse Lab in Glasgow                                                                                                                                                                     | Wellcome Sanger Institute for the COVID-19 Genomics UK (COG-UK) Consortium | Haper VanSteenhouse, Yurni Kasai, David Gray, Carol Clugston, Anna Dominiczak and Alex Alderton, Roberto Amato, Sonia Goncalves, Ewan Harrison, David K. Jackson, Ian Johnston, Dominic Kwiatkowski, Cordelia Langford, John Sillitoe on behalf of the Wellcome Sanger Institute COVID-19 Surveillance Team                                                                                                                                                                                                                                                                                                                                                                        |
| EP1_ISL_703950                                                                                                 | Viology Department, Royal Infirmary of Edinburgh, NHS Lothian, School of Biological Sciences, University of Edinburgh / Institute of Genetics and Molecular Medicine, University of Edinburgh | COVID-19 Genomics UK (COG-UK) Consortium                                   | Mchugh M, Dewar R, Froke S, Gallagher M, Balcazac C, O'Toole A, Scher E, Hill V, McCrone JT, Colquhoun R, Yu X, Jackson B, Rambaut A, Williams TC, Templeton K                                                                                                                                                                                                                                                                                                                                                                                                                                                                                                                     |
| EP1_ISL_703954, EP1_ISL_703956                                                                                 | Lighthouse Lab in Glasgow                                                                                                                                                                     | Wellcome Sanger Institute for the COVID-19 Genomics UK (COG-UK) Consortium | Haper VanSteenhouse, Yurni Kasai, David Gray, Carol Clugston, Anna Dominiczak and Alex Alderton, Roberto Amato, Sonia Goncalves, Ewan Harrison, David K. Jackson, Ian Johnston, Dominic Kwiatkowski, Cordelia Langford, John Sillitoe on behalf of the Wellcome Sanger Institute COVID-19 Surveillance Team                                                                                                                                                                                                                                                                                                                                                                        |
| EP1_ISL_703958, EP1_ISL_703961                                                                                 | Liverpool Clinical Laboratories                                                                                                                                                               | COVID-19 Genomics UK (COG-UK) Consortium                                   | Sam Hadenby, Anita Luczad, Steve Paterson, Julian Hiscox, Alistair Dardy, M Aimsaud, A Alvezahli, Muhammad Atruwail, Stuart D Armstrong, Jones Benjamin, Eleanor G Bentley, Anu Charwa, Jordan J Clark, Angela Cowell, Richard Eccles, Isabel Garcia-Donval, Matthew Gemmill, Alessandro Gerada, PKF Gilmore, Richard Gregory, Ximeng Han, Catherine Hartley, Margaret Hughes, Miran Turzija-Gomara, James Johnson, L Liu, Jennifer Manson, Charlotte Nelson, Elaine O'Toole, Cassie Orlaigh, Rebekah Penrice-Handel, Lucille Rahnov, N P Randle, Trevor Ian Robinson, Parul Sharma, Ghada T Shawli, James P Stewart, Neil Swainson, Ecaterina Varnos, Joanne Wats, Mark Whitehead |
| EP1_ISL_703962, EP1_ISL_703964, EP1_ISL_703967, EP1_ISL_703969                                                 | Lighthouse Lab in Glasgow                                                                                                                                                                     | Wellcome Sanger Institute for the COVID-19 Genomics UK (COG-UK) Consortium | Haper VanSteenhouse, Yurni Kasai, David Gray, Carol Clugston, Anna Dominiczak and Alex Alderton, Roberto Amato, Sonia Goncalves, Ewan Harrison, David K. Jackson, Ian Johnston, Dominic Kwiatkowski, Cordelia Langford, John Sillitoe on behalf of the Wellcome Sanger Institute COVID-19 Surveillance Team                                                                                                                                                                                                                                                                                                                                                                        |
| EP1_ISL_703971                                                                                                 | Liverpool Clinical Laboratories                                                                                                                                                               | COVID-19 Genomics UK (COG-UK) Consortium                                   | Sam Hadenby, Anita Luczad, Steve Paterson, Julian Hiscox, Alistair Dardy, M Aimsaud, A Alvezahli, Muhammad Atruwail, Stuart D Armstrong, Jones Benjamin, Eleanor G Bentley, Anu Charwa, Jordan J Clark, Angela Cowell, Richard Eccles, Isabel Garcia-Donval, Matthew Gemmill, Alessandro Gerada, PKF Gilmore, Richard Gregory, Ximeng Han, Catherine Hartley, Margaret Hughes, Miran Turzija-Gomara, James Johnson, L Liu, Jennifer Manson, Charlotte Nelson, Elaine O'Toole, Cassie Orlaigh, Rebekah Penrice-Handel, Lucille Rahnov, N P Randle, Trevor Ian Robinson, Parul Sharma, Ghada T Shawli, James P Stewart, Neil Swainson, Ecaterina Varnos, Joanne Wats, Mark Whitehead |
| EP1_ISL_703972, EP1_ISL_703975                                                                                 | Lighthouse Lab in Glasgow                                                                                                                                                                     | Wellcome Sanger Institute for the COVID-19 Genomics UK (COG-UK) Consortium | Haper VanSteenhouse, Yurni Kasai, David Gray, Carol Clugston, Anna Dominiczak and Alex Alderton, Roberto Amato, Sonia Goncalves, Ewan Harrison, David K. Jackson, Ian Johnston, Dominic Kwiatkowski, Cordelia Langford, John Sillitoe on behalf of the Wellcome Sanger Institute COVID-19 Surveillance Team                                                                                                                                                                                                                                                                                                                                                                        |
| EP1_ISL_703977                                                                                                 | Liverpool Clinical Laboratories                                                                                                                                                               | COVID-19 Genomics UK (COG-UK) Consortium                                   | Sam Hadenby, Anita Luczad, Steve Paterson, Julian Hiscox, Alistair Dardy, M Aimsaud, A Alvezahli, Muhammad Atruwail, Stuart D Armstrong, Jones Benjamin, Eleanor G Bentley, Anu Charwa, Jordan J Clark, Angela Cowell, Richard Eccles, Isabel Garcia-Donval, Matthew Gemmill, Alessandro Gerada, PKF Gilmore, Richard Gregory, Ximeng Han, Catherine Hartley, Margaret Hughes, Miran Turzija-Gomara, James Johnson, L Liu, Jennifer Manson, Charlotte Nelson, Elaine O'Toole, Cassie Orlaigh, Rebekah Penrice-Handel, Lucille Rahnov, N P Randle, Trevor Ian Robinson, Parul Sharma, Ghada T Shawli, James P Stewart, Neil Swainson, Ecaterina Varnos, Joanne Wats, Mark Whitehead |
| EP1_ISL_703978, EP1_ISL_703980, EP1_ISL_703983                                                                 | Lighthouse Lab in Glasgow                                                                                                                                                                     | Wellcome Sanger Institute for the COVID-19 Genomics UK (COG-UK) Consortium | Haper VanSteenhouse, Yurni Kasai, David Gray, Carol Clugston, Anna Dominiczak and Alex Alderton, Roberto Amato, Sonia Goncalves, Ewan Harrison, David K. Jackson, Ian Johnston, Dominic Kwiatkowski, Cordelia Langford, John Sillitoe on behalf of the Wellcome Sanger Institute COVID-19 Surveillance Team                                                                                                                                                                                                                                                                                                                                                                        |
| EP1_ISL_703985, EP1_ISL_703987                                                                                 | Wales Specialist Virology Centre Sequencing lab: Pathogen Genomics Unit                                                                                                                       | COVID-19 Genomics UK (COG-UK) Consortium                                   | Catherine Moore, Johnathan Evans, Laura Gifford, Malone Perry, Simon Cottrell, Angela Marchbank, Alec Birchley, Alexander Adams, Amy Gaskin, Bree Gatica-Wilcox, Jason Coombes, Joel Southgate, Lauren Gilbert, Lee Graham, Nicole Paschianzi, Sara Kunzenga-Summerhayes, Sarah Taylor, Sophie Jones, Sara Ray, Matthew Bili, Joanne Walkins, Sally Corden, Tom Connor                                                                                                                                                                                                                                                                                                             |
| EP1_ISL_703988                                                                                                 | Lighthouse Lab in Glasgow                                                                                                                                                                     | Wellcome Sanger Institute for the COVID-19 Genomics UK (COG-UK) Consortium | Haper VanSteenhouse, Yurni Kasai, David Gray, Carol Clugston, Anna Dominiczak and Alex Alderton, Roberto Amato, Sonia Goncalves, Ewan Harrison, David K. Jackson, Ian Johnston, Dominic Kwiatkowski, Cordelia Langford, John Sillitoe on behalf of the Wellcome Sanger Institute COVID-19 Surveillance Team                                                                                                                                                                                                                                                                                                                                                                        |
| EP1_ISL_703990, EP1_ISL_703992                                                                                 | Liverpool Clinical Laboratories                                                                                                                                                               | COVID-19 Genomics UK (COG-UK) Consortium                                   | Sam Hadenby, Anita Luczad, Steve Paterson, Julian Hiscox, Alistair Dardy, M Aimsaud, A Alvezahli, Muhammad Atruwail, Stuart D Armstrong, Jones Benjamin, Eleanor G Bentley, Anu Charwa, Jordan J Clark, Angela Cowell, Richard Eccles, Isabel Garcia-Donval, Matthew Gemmill, Alessandro Gerada, PKF Gilmore, Richard Gregory, Ximeng Han, Catherine Hartley, Margaret Hughes, Miran Turzija-Gomara, James Johnson, L Liu, Jennifer Manson, Charlotte Nelson, Elaine O'Toole, Cassie Orlaigh, Rebekah Penrice-Handel, Lucille Rahnov, N P Randle, Trevor Ian Robinson, Parul Sharma, Ghada T Shawli, James P Stewart, Neil Swainson, Ecaterina Varnos, Joanne Wats, Mark Whitehead |
| EP1_ISL_703994                                                                                                 | Lighthouse Lab in Glasgow                                                                                                                                                                     | Wellcome Sanger Institute for the COVID-19 Genomics UK (COG-UK) Consortium | Haper VanSteenhouse, Yurni Kasai, David Gray, Carol Clugston, Anna Dominiczak and Alex Alderton, Roberto Amato, Sonia Goncalves, Ewan Harrison, David K. Jackson, Ian Johnston, Dominic Kwiatkowski, Cordelia Langford, John Sillitoe on behalf of the Wellcome Sanger Institute COVID-19 Surveillance Team                                                                                                                                                                                                                                                                                                                                                                        |
| EP1_ISL_703995                                                                                                 | Liverpool Clinical Laboratories                                                                                                                                                               | COVID-19 Genomics UK (COG-UK) Consortium                                   | Sam Hadenby, Anita Luczad, Steve Paterson, Julian Hiscox, Alistair Dardy, M Aimsaud, A Alvezahli, Muhammad Atruwail, Stuart D Armstrong, Jones Benjamin, Eleanor G Bentley, Anu Charwa, Jordan J Clark, Angela Cowell, Richard Eccles, Isabel Garcia-Donval, Matthew Gemmill, Alessandro Gerada, PKF Gilmore, Richard Gregory, Ximeng Han, Catherine Hartley, Margaret Hughes, Miran Turzija-Gomara, James Johnson, L Liu, Jennifer Manson, Charlotte Nelson, Elaine O'Toole, Cassie Orlaigh, Rebekah Penrice-Handel, Lucille Rahnov, N P Randle, Trevor Ian Robinson, Parul Sharma, Ghada T Shawli, James P Stewart, Neil Swainson, Ecaterina Varnos, Joanne Wats, Mark Whitehead |
| EP1_ISL_704002, EP1_ISL_704004                                                                                 | Lighthouse Lab in Glasgow                                                                                                                                                                     | Wellcome Sanger Institute for the COVID-19 Genomics UK (COG-UK) Consortium | Haper VanSteenhouse, Yurni Kasai, David Gray, Carol Clugston, Anna Dominiczak and Alex Alderton, Roberto Amato, Sonia Goncalves, Ewan Harrison, David K. Jackson, Ian Johnston, Dominic Kwiatkowski, Cordelia Langford, John Sillitoe on behalf of the Wellcome Sanger Institute COVID-19 Surveillance Team                                                                                                                                                                                                                                                                                                                                                                        |



|                                                                                                                        |                                                                         |                                                                            |                                                                                                                                                                                                                                                                                                                                                                                                                                                                                                                                                                                                                                                                                    |
|------------------------------------------------------------------------------------------------------------------------|-------------------------------------------------------------------------|----------------------------------------------------------------------------|------------------------------------------------------------------------------------------------------------------------------------------------------------------------------------------------------------------------------------------------------------------------------------------------------------------------------------------------------------------------------------------------------------------------------------------------------------------------------------------------------------------------------------------------------------------------------------------------------------------------------------------------------------------------------------|
| EPI_SL_704006                                                                                                          | Liverpool Clinical Laboratories                                         | COVID-19 Genomics UK (COG-UK) Consortium                                   | Sam Hadenby, Anita Lucead, Steve Paterson, Julian Hiscox, Alistair Darby, M Almsaud, A Alvezahli, Muhammad Atruwail, Stuart D Armstrong, Jones Benjamin, Eleanor G Bentley, Anu Chawla, Jordan J Clark, Angela Cowell, Richard Eccles, Isabel Garcia-Donval, Matthew Gemmill, Alessandro Gerada, PFR Gilmore, Richard Gregory, Ximeng Han, Catherine Hartley, Margaret Hughes, Miran Iurriza-Gomara, James Johnson, L Liu, Jennifer Manson, Charlotte Nelson, Elaine O'Toole, Cassie Orlaigh, Rebekah Penrice-Handel, Lucille Rahnov, N P Randle, Trevor Ian Robinson, Parul Sharma, Ghada T Shawli, James P Stewart, Neil Swainson, Ecaterina Varnos, Joanne Wats, Mark Whitehead |
| EPI_SL_704009                                                                                                          | Liverpool Clinical Laboratories                                         | COVID-19 Genomics UK (COG-UK) Consortium                                   | Sam Hadenby, Anita Lucead, Steve Paterson, Julian Hiscox, Alistair Darby, M Almsaud, A Alvezahli, Muhammad Atruwail, Stuart D Armstrong, Jones Benjamin, Eleanor G Bentley, Anu Chawla, Jordan J Clark, Angela Cowell, Richard Eccles, Isabel Garcia-Donval, Matthew Gemmill, Alessandro Gerada, PFR Gilmore, Richard Gregory, Ximeng Han, Catherine Hartley, Margaret Hughes, Miran Iurriza-Gomara, James Johnson, L Liu, Jennifer Manson, Charlotte Nelson, Elaine O'Toole, Cassie Orlaigh, Rebekah Penrice-Handel, Lucille Rahnov, N P Randle, Trevor Ian Robinson, Parul Sharma, Ghada T Shawli, James P Stewart, Neil Swainson, Ecaterina Varnos, Joanne Wats, Mark Whitehead |
| EPI_SL_704013                                                                                                          | Lighthouse Lab in Glasgow                                               | Wellcome Sanger Institute for the COVID-19 Genomics UK (COG-UK) Consortium | Happer VanSteenhouse, Yurni Kasali, David Gray, Carol Clugston, Anna Dominiczak and Alex Alderton, Roberto Amato, Sonia Goncalves, Ewan Harrison, David K. Jackson, Ian Johnston, Dominic Kwiatkowski, Cordelia Langford, John Sillitoe on behalf of the Wellcome Sanger Institute COVID-19 Surveillance Team                                                                                                                                                                                                                                                                                                                                                                      |
| EPI_SL_704014                                                                                                          | Wales Specialist Virology Centre Sequencing lab: Pathogen Genomics Unit | COVID-19 Genomics UK (COG-UK) Consortium                                   | Catherine Moore, Johnathan Evans, Laura Gifford, Malorie Perry, Simon Cottrell, Angela Marchbank, Alec Birchley, Alexander Adams, Amy Gasikin, Bree Galica-Wilcox, Jason Coombes, Joel Soutargate, Lauren Gilbert, Lee Graham, Nicole Fracharini, Sara Kunzrens-Summerhayes, Sarah Taylor, Sophie Jones, Sara Hay, Matthew Bui, Joanne Walkins, Sally Corden, Tom Connor                                                                                                                                                                                                                                                                                                           |
| EPI_SL_704015                                                                                                          | Lighthouse Lab in Glasgow                                               | Wellcome Sanger Institute for the COVID-19 Genomics UK (COG-UK) Consortium | Happer VanSteenhouse, Yurni Kasali, David Gray, Carol Clugston, Anna Dominiczak and Alex Alderton, Roberto Amato, Sonia Goncalves, Ewan Harrison, David K. Jackson, Ian Johnston, Dominic Kwiatkowski, Cordelia Langford, John Sillitoe on behalf of the Wellcome Sanger Institute COVID-19 Surveillance Team                                                                                                                                                                                                                                                                                                                                                                      |
| EPI_SL_704017                                                                                                          | Wales Specialist Virology Centre Sequencing lab: Pathogen Genomics Unit | COVID-19 Genomics UK (COG-UK) Consortium                                   | Catherine Moore, Johnathan Evans, Laura Gifford, Malorie Perry, Simon Cottrell, Angela Marchbank, Alec Birchley, Alexander Adams, Amy Gasikin, Bree Galica-Wilcox, Jason Coombes, Joel Soutargate, Lauren Gilbert, Lee Graham, Nicole Fracharini, Sara Kunzrens-Summerhayes, Sarah Taylor, Sophie Jones, Sara Hay, Matthew Bui, Joanne Walkins, Sally Corden, Tom Connor                                                                                                                                                                                                                                                                                                           |
| EPI_SL_704020                                                                                                          | Liverpool Clinical Laboratories                                         | COVID-19 Genomics UK (COG-UK) Consortium                                   | Sam Hadenby, Anita Lucead, Steve Paterson, Julian Hiscox, Alistair Darby, M Almsaud, A Alvezahli, Muhammad Atruwail, Stuart D Armstrong, Jones Benjamin, Eleanor G Bentley, Anu Chawla, Jordan J Clark, Angela Cowell, Richard Eccles, Isabel Garcia-Donval, Matthew Gemmill, Alessandro Gerada, PFR Gilmore, Richard Gregory, Ximeng Han, Catherine Hartley, Margaret Hughes, Miran Iurriza-Gomara, James Johnson, L Liu, Jennifer Manson, Charlotte Nelson, Elaine O'Toole, Cassie Orlaigh, Rebekah Penrice-Handel, Lucille Rahnov, N P Randle, Trevor Ian Robinson, Parul Sharma, Ghada T Shawli, James P Stewart, Neil Swainson, Ecaterina Varnos, Joanne Wats, Mark Whitehead |
| EPI_SL_704021, EPI_SL_704023, EPI_SL_704024, EPI_SL_704026                                                             | Lighthouse Lab in Glasgow                                               | Wellcome Sanger Institute for the COVID-19 Genomics UK (COG-UK) Consortium | Happer VanSteenhouse, Yurni Kasali, David Gray, Carol Clugston, Anna Dominiczak and Alex Alderton, Roberto Amato, Sonia Goncalves, Ewan Harrison, David K. Jackson, Ian Johnston, Dominic Kwiatkowski, Cordelia Langford, John Sillitoe on behalf of the Wellcome Sanger Institute COVID-19 Surveillance Team                                                                                                                                                                                                                                                                                                                                                                      |
| EPI_SL_704028                                                                                                          | Liverpool Clinical Laboratories                                         | COVID-19 Genomics UK (COG-UK) Consortium                                   | Sam Hadenby, Anita Lucead, Steve Paterson, Julian Hiscox, Alistair Darby, M Almsaud, A Alvezahli, Muhammad Atruwail, Stuart D Armstrong, Jones Benjamin, Eleanor G Bentley, Anu Chawla, Jordan J Clark, Angela Cowell, Richard Eccles, Isabel Garcia-Donval, Matthew Gemmill, Alessandro Gerada, PFR Gilmore, Richard Gregory, Ximeng Han, Catherine Hartley, Margaret Hughes, Miran Iurriza-Gomara, James Johnson, L Liu, Jennifer Manson, Charlotte Nelson, Elaine O'Toole, Cassie Orlaigh, Rebekah Penrice-Handel, Lucille Rahnov, N P Randle, Trevor Ian Robinson, Parul Sharma, Ghada T Shawli, James P Stewart, Neil Swainson, Ecaterina Varnos, Joanne Wats, Mark Whitehead |
| EPI_SL_704032, EPI_SL_704034, EPI_SL_704035, EPI_SL_704037, EPI_SL_704039, EPI_SL_704042, EPI_SL_704045, EPI_SL_704048 | Lighthouse Lab in Glasgow                                               | Wellcome Sanger Institute for the COVID-19 Genomics UK (COG-UK) Consortium | Happer VanSteenhouse, Yurni Kasali, David Gray, Carol Clugston, Anna Dominiczak and Alex Alderton, Roberto Amato, Sonia Goncalves, Ewan Harrison, David K. Jackson, Ian Johnston, Dominic Kwiatkowski, Cordelia Langford, John Sillitoe on behalf of the Wellcome Sanger Institute COVID-19 Surveillance Team                                                                                                                                                                                                                                                                                                                                                                      |
| EPI_SL_704049                                                                                                          | Liverpool Clinical Laboratories                                         | COVID-19 Genomics UK (COG-UK) Consortium                                   | Sam Hadenby, Anita Lucead, Steve Paterson, Julian Hiscox, Alistair Darby, M Almsaud, A Alvezahli, Muhammad Atruwail, Stuart D Armstrong, Jones Benjamin, Eleanor G Bentley, Anu Chawla, Jordan J Clark, Angela Cowell, Richard Eccles, Isabel Garcia-Donval, Matthew Gemmill, Alessandro Gerada, PFR Gilmore, Richard Gregory, Ximeng Han, Catherine Hartley, Margaret Hughes, Miran Iurriza-Gomara, James Johnson, L Liu, Jennifer Manson, Charlotte Nelson, Elaine O'Toole, Cassie Orlaigh, Rebekah Penrice-Handel, Lucille Rahnov, N P Randle, Trevor Ian Robinson, Parul Sharma, Ghada T Shawli, James P Stewart, Neil Swainson, Ecaterina Varnos, Joanne Wats, Mark Whitehead |
| EPI_SL_704051                                                                                                          | Lighthouse Lab in Glasgow                                               | Wellcome Sanger Institute for the COVID-19 Genomics UK (COG-UK) Consortium | Happer VanSteenhouse, Yurni Kasali, David Gray, Carol Clugston, Anna Dominiczak and Alex Alderton, Roberto Amato, Sonia Goncalves, Ewan Harrison, David K. Jackson, Ian Johnston, Dominic Kwiatkowski, Cordelia Langford, John Sillitoe on behalf of the Wellcome Sanger Institute COVID-19 Surveillance Team                                                                                                                                                                                                                                                                                                                                                                      |
| EPI_SL_704052                                                                                                          | University College London Hospital                                      | COVID-19 Genomics UK (COG-UK) Consortium                                   | Judith Heaney, Matthew Byott, Catherine Houllihan, Dan Frampton, Stuart Kirk, Maura Spyer and Elani Nastouli                                                                                                                                                                                                                                                                                                                                                                                                                                                                                                                                                                       |
| EPI_SL_704056                                                                                                          | Lighthouse Lab in Glasgow                                               | Wellcome Sanger Institute for the COVID-19 Genomics UK (COG-UK) Consortium | Happer VanSteenhouse, Yurni Kasali, David Gray, Carol Clugston, Anna Dominiczak and Alex Alderton, Roberto Amato, Sonia Goncalves, Ewan Harrison, David K. Jackson, Ian Johnston, Dominic Kwiatkowski, Cordelia Langford, John Sillitoe on behalf of the Wellcome Sanger Institute COVID-19 Surveillance Team                                                                                                                                                                                                                                                                                                                                                                      |
| EPI_SL_704057                                                                                                          | Liverpool Clinical Laboratories                                         | COVID-19 Genomics UK (COG-UK) Consortium                                   | Sam Hadenby, Anita Lucead, Steve Paterson, Julian Hiscox, Alistair Darby, M Almsaud, A Alvezahli, Muhammad Atruwail, Stuart D Armstrong, Jones Benjamin, Eleanor G Bentley, Anu Chawla, Jordan J Clark, Angela Cowell, Richard Eccles, Isabel Garcia-Donval, Matthew Gemmill, Alessandro Gerada, PFR Gilmore, Richard Gregory, Ximeng Han, Catherine Hartley, Margaret Hughes, Miran Iurriza-Gomara, James Johnson, L Liu, Jennifer Manson, Charlotte Nelson, Elaine O'Toole, Cassie Orlaigh, Rebekah Penrice-Handel, Lucille Rahnov, N P Randle, Trevor Ian Robinson, Parul Sharma, Ghada T Shawli, James P Stewart, Neil Swainson, Ecaterina Varnos, Joanne Wats, Mark Whitehead |
| EPI_SL_704060                                                                                                          | Department of Pathology, University of Cambridge                        | COVID-19 Genomics UK (COG-UK) Consortium                                   | Aminu S. Jatum, Yasmin Chaudhry, Grant Hall, Ilana Georgiana, Myra Hosniilo, Martin D. Curran, Malte Frickert, Surendra Parmar, Ian Goodfellow                                                                                                                                                                                                                                                                                                                                                                                                                                                                                                                                     |
| EPI_SL_704063                                                                                                          | Lighthouse Lab in Glasgow                                               | Wellcome Sanger Institute for the COVID-19 Genomics UK (COG-UK) Consortium | Happer VanSteenhouse, Yurni Kasali, David Gray, Carol Clugston, Anna Dominiczak and Alex Alderton, Roberto Amato, Sonia Goncalves, Ewan Harrison, David K. Jackson, Ian Johnston, Dominic Kwiatkowski, Cordelia Langford, John Sillitoe on behalf of the Wellcome Sanger Institute COVID-19 Surveillance Team                                                                                                                                                                                                                                                                                                                                                                      |
| EPI_SL_704065                                                                                                          | Liverpool Clinical Laboratories                                         | COVID-19 Genomics UK (COG-UK) Consortium                                   | Sam Hadenby, Anita Lucead, Steve Paterson, Julian Hiscox, Alistair Darby, M Almsaud, A Alvezahli, Muhammad Atruwail, Stuart D Armstrong, Jones Benjamin, Eleanor G Bentley, Anu Chawla, Jordan J Clark, Angela Cowell, Richard Eccles, Isabel Garcia-Donval, Matthew Gemmill, Alessandro Gerada, PFR Gilmore, Richard Gregory, Ximeng Han, Catherine Hartley, Margaret Hughes, Miran Iurriza-Gomara, James Johnson, L Liu, Jennifer Manson, Charlotte Nelson, Elaine O'Toole, Cassie Orlaigh, Rebekah Penrice-Handel, Lucille Rahnov, N P Randle, Trevor Ian Robinson, Parul Sharma, Ghada T Shawli, James P Stewart, Neil Swainson, Ecaterina Varnos, Joanne Wats, Mark Whitehead |
| EPI_SL_704066                                                                                                          | Lighthouse Lab in Glasgow                                               | Wellcome Sanger Institute for the COVID-19 Genomics UK (COG-UK) Consortium | Happer VanSteenhouse, Yurni Kasali, David Gray, Carol Clugston, Anna Dominiczak and Alex Alderton, Roberto Amato, Sonia Goncalves, Ewan Harrison, David K. Jackson, Ian Johnston, Dominic Kwiatkowski, Cordelia Langford, John Sillitoe on behalf of the Wellcome Sanger Institute COVID-19 Surveillance Team                                                                                                                                                                                                                                                                                                                                                                      |
| EPI_SL_704068                                                                                                          | Liverpool Clinical Laboratories                                         | COVID-19 Genomics UK (COG-UK) Consortium                                   | Sam Hadenby, Anita Lucead, Steve Paterson, Julian Hiscox, Alistair Darby, M Almsaud, A Alvezahli, Muhammad Atruwail, Stuart D Armstrong, Jones Benjamin, Eleanor G Bentley, Anu Chawla, Jordan J Clark, Angela Cowell, Richard Eccles, Isabel Garcia-Donval, Matthew Gemmill, Alessandro Gerada, PFR Gilmore, Richard Gregory, Ximeng Han, Catherine Hartley, Margaret Hughes, Miran Iurriza-Gomara, James Johnson, L Liu, Jennifer Manson, Charlotte Nelson, Elaine O'Toole, Cassie Orlaigh, Rebekah Penrice-Handel, Lucille Rahnov, N P Randle, Trevor Ian Robinson, Parul Sharma, Ghada T Shawli, James P Stewart, Neil Swainson, Ecaterina Varnos, Joanne Wats, Mark Whitehead |

|                                                                                                                                                                                |                                                                                                           |                                                                            |                                                                                                                                                                                                                                                                                                                                                                                                                                                                                                                                                                                                                                                                                     |
|--------------------------------------------------------------------------------------------------------------------------------------------------------------------------------|-----------------------------------------------------------------------------------------------------------|----------------------------------------------------------------------------|-------------------------------------------------------------------------------------------------------------------------------------------------------------------------------------------------------------------------------------------------------------------------------------------------------------------------------------------------------------------------------------------------------------------------------------------------------------------------------------------------------------------------------------------------------------------------------------------------------------------------------------------------------------------------------------|
| EPL_ISL_704069                                                                                                                                                                 | Lighthouse Lab in Glasgow                                                                                 | Wellcome Sanger Institute for the COVID-19 Genomics UK (COG-UK) Consortium | Haperi VansSteerhouse, Yurni Kasali, David Gray, Carol Clugston, Anna Dominiczak and Alex Alderton, Roberto Amato, Sonia Goncalves, Ewan Harrison, David K. Jackson, Ian Johnston, Dominic Kwiatkowski, Cordelia Langford, John Sillitoe on behalf of the Wellcome Sanger Institute COVID-19 Surveillance Team                                                                                                                                                                                                                                                                                                                                                                      |
| EPL_ISL_704070                                                                                                                                                                 | Quadram Institute Bioscience                                                                              | COVID-19 Genomics UK (COG-UK) Consortium                                   | Dave J. Baker, Gemma L. Kay, Alp Aydin, Thanh Le-Viet, Steven Rudder, Ana P. Tedim, Anastasia Kolyva, Maria Diaz, Leonardo de Oliveira Martins, Nabil-Farzed Alkhran, Lizzie Meadows, Rachael Stanley, Nguzi Elnurgo, Muhammad Yasir, Nicholas M. Thomson, Alexander J. Trotter, Rachel Gilroy, Samuel Bloomfield, Claire Stuart, Andrew Bell, Heenesh Prakash, Sami Dervisevic, Alison E. Mather, John Wan, Mark Webber, Andrew J. Page, Justin O'Grady                                                                                                                                                                                                                            |
| EPL_ISL_704071                                                                                                                                                                 | Lighthouse Lab in Glasgow                                                                                 | Wellcome Sanger Institute for the COVID-19 Genomics UK (COG-UK) Consortium | Haperi VansSteerhouse, Yurni Kasali, David Gray, Carol Clugston, Anna Dominiczak and Alex Alderton, Roberto Amato, Sonia Goncalves, Ewan Harrison, David K. Jackson, Ian Johnston, Dominic Kwiatkowski, Cordelia Langford, John Sillitoe on behalf of the Wellcome Sanger Institute COVID-19 Surveillance Team                                                                                                                                                                                                                                                                                                                                                                      |
| EPL_ISL_704076                                                                                                                                                                 | Department of Pathology, University of Cambridge                                                          | COVID-19 Genomics UK (COG-UK) Consortium                                   | Annu S. Jatun, Yasmin Chaudhry, Grant Hall, Iliana Georgiana, Myra Hosmilo, Martin D. Curran, Malte Prickett, Surendra Parmar, Ian Goodfellow                                                                                                                                                                                                                                                                                                                                                                                                                                                                                                                                       |
| EPL_ISL_704077, EPL_ISL_704078                                                                                                                                                 | Lighthouse Lab in Glasgow                                                                                 | Wellcome Sanger Institute for the COVID-19 Genomics UK (COG-UK) Consortium | Haperi VansSteerhouse, Yurni Kasali, David Gray, Carol Clugston, Anna Dominiczak and Alex Alderton, Roberto Amato, Sonia Goncalves, Ewan Harrison, David K. Jackson, Ian Johnston, Dominic Kwiatkowski, Cordelia Langford, John Sillitoe on behalf of the Wellcome Sanger Institute COVID-19 Surveillance Team                                                                                                                                                                                                                                                                                                                                                                      |
| EPL_ISL_704089                                                                                                                                                                 | West of Scotland Specialist Virology Centre, NHSGCG / MRC-University of Glasgow Centre for Virus Research | COVID-19 Genomics UK (COG-UK) Consortium                                   | Ana da Silva Filipe, Natasha Johnson, Kathy Shmilet, Daniel Mair, Stephen Carmichael, Alice Boos, Lily Tong, Jenna Nichols, Kyriaki Ntomkou, Sarah McDonald, Rachel Higgins, Steenu Vaidipally, David L. Robertson, Alasdair Maclean, Rory Gurnson, Sharif Shaaban, Matthew Holden, Rachel Biscoe, Guy Mollett, Kathy U, James Shepherd, Antonia Ho, Emma Thomson                                                                                                                                                                                                                                                                                                                   |
| EPL_ISL_704090, EPL_ISL_704091, EPL_ISL_704094, EPL_ISL_704096                                                                                                                 | Lighthouse Lab in Glasgow                                                                                 | Wellcome Sanger Institute for the COVID-19 Genomics UK (COG-UK) Consortium | Haperi VansSteerhouse, Yurni Kasali, David Gray, Carol Clugston, Anna Dominiczak and Alex Alderton, Roberto Amato, Sonia Goncalves, Ewan Harrison, David K. Jackson, Ian Johnston, Dominic Kwiatkowski, Cordelia Langford, John Sillitoe on behalf of the Wellcome Sanger Institute COVID-19 Surveillance Team                                                                                                                                                                                                                                                                                                                                                                      |
| EPL_ISL_704097                                                                                                                                                                 | Liverpool Clinical Laboratories                                                                           | COVID-19 Genomics UK (COG-UK) Consortium                                   | Sam Hadenby, Anita Lucad, Steve Paterson, Julian Hiscox, Alistair Darby, M Aimsaud, A Alvezzali, Muhammad Airuwalli, Stuart D Armstrong, Jones Benjamin, Eleanor G Bentley, Anu Chawla, Jordan J Clark, Angela Cawell, Richard Eccles, Isabel Garcia-Donval, Matthew Gemmill, Alessandro Gerada, PFK Gilmore, Richard Gregory, Ximeng Han, Catherine Hartley, Margaret Hughes, Miran Ijurza-Gomara, James Johnson, L. Liu, Jennifer Manson, Charlotte Nelson, Elaine O'Toole, Cassie Olatelu, Rebekah Penrice-Handel, Lucille Ranbow, N P Randle, Trevor Ian Robinson, Parul Sharma, Ghada T Shawli, James P Stewart, Neil Swainson, Ecaterina Varnos, Joanne Watts, Mark Whitehead |
| EPL_ISL_704103, EPL_ISL_704106, EPL_ISL_704107, EPL_ISL_704110, EPL_ISL_704116, EPL_ISL_704117, EPL_ISL_704122, EPL_ISL_704124, EPL_ISL_704125, EPL_ISL_704127, EPL_ISL_704130 | Lighthouse Lab in Glasgow                                                                                 | Wellcome Sanger Institute for the COVID-19 Genomics UK (COG-UK) Consortium | Haperi VansSteerhouse, Yurni Kasali, David Gray, Carol Clugston, Anna Dominiczak and Alex Alderton, Roberto Amato, Sonia Goncalves, Ewan Harrison, David K. Jackson, Ian Johnston, Dominic Kwiatkowski, Cordelia Langford, John Sillitoe on behalf of the Wellcome Sanger Institute COVID-19 Surveillance Team                                                                                                                                                                                                                                                                                                                                                                      |
| EPL_ISL_704131                                                                                                                                                                 | Liverpool Clinical Laboratories                                                                           | COVID-19 Genomics UK (COG-UK) Consortium                                   | Sam Hadenby, Anita Lucad, Steve Paterson, Julian Hiscox, Alistair Darby, M Aimsaud, A Alvezzali, Muhammad Airuwalli, Stuart D Armstrong, Jones Benjamin, Eleanor G Bentley, Anu Chawla, Jordan J Clark, Angela Cawell, Richard Eccles, Isabel Garcia-Donval, Matthew Gemmill, Alessandro Gerada, PFK Gilmore, Richard Gregory, Ximeng Han, Catherine Hartley, Margaret Hughes, Miran Ijurza-Gomara, James Johnson, L. Liu, Jennifer Manson, Charlotte Nelson, Elaine O'Toole, Cassie Olatelu, Rebekah Penrice-Handel, Lucille Ranbow, N P Randle, Trevor Ian Robinson, Parul Sharma, Ghada T Shawli, James P Stewart, Neil Swainson, Ecaterina Varnos, Joanne Watts, Mark Whitehead |
| EPL_ISL_704133                                                                                                                                                                 | Lighthouse Lab in Glasgow                                                                                 | Wellcome Sanger Institute for the COVID-19 Genomics UK (COG-UK) Consortium | Haperi VansSteerhouse, Yurni Kasali, David Gray, Carol Clugston, Anna Dominiczak and Alex Alderton, Roberto Amato, Sonia Goncalves, Ewan Harrison, David K. Jackson, Ian Johnston, Dominic Kwiatkowski, Cordelia Langford, John Sillitoe on behalf of the Wellcome Sanger Institute COVID-19 Surveillance Team                                                                                                                                                                                                                                                                                                                                                                      |
| EPL_ISL_704137                                                                                                                                                                 | Liverpool Clinical Laboratories                                                                           | COVID-19 Genomics UK (COG-UK) Consortium                                   | Sam Hadenby, Anita Lucad, Steve Paterson, Julian Hiscox, Alistair Darby, M Aimsaud, A Alvezzali, Muhammad Airuwalli, Stuart D Armstrong, Jones Benjamin, Eleanor G Bentley, Anu Chawla, Jordan J Clark, Angela Cawell, Richard Eccles, Isabel Garcia-Donval, Matthew Gemmill, Alessandro Gerada, PFK Gilmore, Richard Gregory, Ximeng Han, Catherine Hartley, Margaret Hughes, Miran Ijurza-Gomara, James Johnson, L. Liu, Jennifer Manson, Charlotte Nelson, Elaine O'Toole, Cassie Olatelu, Rebekah Penrice-Handel, Lucille Ranbow, N P Randle, Trevor Ian Robinson, Parul Sharma, Ghada T Shawli, James P Stewart, Neil Swainson, Ecaterina Varnos, Joanne Watts, Mark Whitehead |
| EPL_ISL_704138                                                                                                                                                                 | Lighthouse Lab in Glasgow                                                                                 | Wellcome Sanger Institute for the COVID-19 Genomics UK (COG-UK) Consortium | Haperi VansSteerhouse, Yurni Kasali, David Gray, Carol Clugston, Anna Dominiczak and Alex Alderton, Roberto Amato, Sonia Goncalves, Ewan Harrison, David K. Jackson, Ian Johnston, Dominic Kwiatkowski, Cordelia Langford, John Sillitoe on behalf of the Wellcome Sanger Institute COVID-19 Surveillance Team                                                                                                                                                                                                                                                                                                                                                                      |
| EPL_ISL_704139                                                                                                                                                                 | Quadram Institute Bioscience                                                                              | COVID-19 Genomics UK (COG-UK) Consortium                                   | Dave J. Baker, Gemma L. Kay, Alp Aydin, Thanh Le-Viet, Steven Rudder, Ana P. Tedim, Anastasia Kolyva, Maria Diaz, Leonardo de Oliveira Martins, Nabil-Farzed Alkhran, Lizzie Meadows, Rachael Stanley, Nguzi Elnurgo, Muhammad Yasir, Nicholas M. Thomson, Alexander J. Trotter, Rachel Gilroy, Samuel Bloomfield, Claire Stuart, Andrew Bell, Heenesh Prakash, Sami Dervisevic, Alison E. Mather, John Wan, Mark Webber, Andrew J. Page, Justin O'Grady                                                                                                                                                                                                                            |
| EPL_ISL_704140                                                                                                                                                                 | Lighthouse Lab in Glasgow                                                                                 | Wellcome Sanger Institute for the COVID-19 Genomics UK (COG-UK) Consortium | Haperi VansSteerhouse, Yurni Kasali, David Gray, Carol Clugston, Anna Dominiczak and Alex Alderton, Roberto Amato, Sonia Goncalves, Ewan Harrison, David K. Jackson, Ian Johnston, Dominic Kwiatkowski, Cordelia Langford, John Sillitoe on behalf of the Wellcome Sanger Institute COVID-19 Surveillance Team                                                                                                                                                                                                                                                                                                                                                                      |
| EPL_ISL_704142, EPL_ISL_704145, EPL_ISL_704148                                                                                                                                 | Quadram Institute Bioscience                                                                              | COVID-19 Genomics UK (COG-UK) Consortium                                   | Dave J. Baker, Gemma L. Kay, Alp Aydin, Thanh Le-Viet, Steven Rudder, Ana P. Tedim, Anastasia Kolyva, Maria Diaz, Leonardo de Oliveira Martins, Nabil-Farzed Alkhran, Lizzie Meadows, Rachael Stanley, Nguzi Elnurgo, Muhammad Yasir, Nicholas M. Thomson, Alexander J. Trotter, Rachel Gilroy, Samuel Bloomfield, Claire Stuart, Andrew Bell, Heenesh Prakash, Sami Dervisevic, Alison E. Mather, John Wan, Mark Webber, Andrew J. Page, Justin O'Grady                                                                                                                                                                                                                            |
| EPL_ISL_704149                                                                                                                                                                 | Lighthouse Lab in Glasgow                                                                                 | Wellcome Sanger Institute for the COVID-19 Genomics UK (COG-UK) Consortium | Haperi VansSteerhouse, Yurni Kasali, David Gray, Carol Clugston, Anna Dominiczak and Alex Alderton, Roberto Amato, Sonia Goncalves, Ewan Harrison, David K. Jackson, Ian Johnston, Dominic Kwiatkowski, Cordelia Langford, John Sillitoe on behalf of the Wellcome Sanger Institute COVID-19 Surveillance Team                                                                                                                                                                                                                                                                                                                                                                      |
| EPL_ISL_704150                                                                                                                                                                 | Quadram Institute Bioscience                                                                              | COVID-19 Genomics UK (COG-UK) Consortium                                   | Dave J. Baker, Gemma L. Kay, Alp Aydin, Thanh Le-Viet, Steven Rudder, Ana P. Tedim, Anastasia Kolyva, Maria Diaz, Leonardo de Oliveira Martins, Nabil-Farzed Alkhran, Lizzie Meadows, Rachael Stanley, Nguzi Elnurgo, Muhammad Yasir, Nicholas M. Thomson, Alexander J. Trotter, Rachel Gilroy, Samuel Bloomfield, Claire Stuart, Andrew Bell, Heenesh Prakash, Sami Dervisevic, Alison E. Mather, John Wan, Mark Webber, Andrew J. Page, Justin O'Grady                                                                                                                                                                                                                            |
| EPL_ISL_704151, EPL_ISL_704152                                                                                                                                                 | Lighthouse Lab in Glasgow                                                                                 | Wellcome Sanger Institute for the COVID-19 Genomics UK (COG-UK) Consortium | Haperi VansSteerhouse, Yurni Kasali, David Gray, Carol Clugston, Anna Dominiczak and Alex Alderton, Roberto Amato, Sonia Goncalves, Ewan Harrison, David K. Jackson, Ian Johnston, Dominic Kwiatkowski, Cordelia Langford, John Sillitoe on behalf of the Wellcome Sanger Institute COVID-19 Surveillance Team                                                                                                                                                                                                                                                                                                                                                                      |
| EPL_ISL_704153                                                                                                                                                                 | Liverpool Clinical Laboratories                                                                           | COVID-19 Genomics UK (COG-UK) Consortium                                   | Sam Hadenby, Anita Lucad, Steve Paterson, Julian Hiscox, Alistair Darby, M Aimsaud, A Alvezzali, Muhammad Airuwalli, Stuart D Armstrong, Jones Benjamin, Eleanor G Bentley, Anu Chawla, Jordan J Clark, Angela Cawell, Richard Eccles, Isabel Garcia-Donval, Matthew Gemmill, Alessandro Gerada, PFK Gilmore, Richard Gregory, Ximeng Han, Catherine Hartley, Margaret Hughes, Miran Ijurza-Gomara, James Johnson, L. Liu, Jennifer Manson, Charlotte Nelson, Elaine O'Toole, Cassie Olatelu, Rebekah Penrice-Handel, Lucille Ranbow, N P Randle, Trevor Ian Robinson, Parul Sharma, Ghada T Shawli, James P Stewart, Neil Swainson, Ecaterina Varnos, Joanne Watts, Mark Whitehead |
| EPL_ISL_704154, EPL_ISL_704155                                                                                                                                                 | Lighthouse Lab in Glasgow                                                                                 | Wellcome Sanger Institute for the COVID-19 Genomics UK (COG-UK) Consortium | Haperi VansSteerhouse, Yurni Kasali, David Gray, Carol Clugston, Anna Dominiczak and Alex Alderton, Roberto Amato, Sonia Goncalves, Ewan Harrison, David K. Jackson, Ian Johnston, Dominic Kwiatkowski, Cordelia Langford, John Sillitoe on behalf of the Wellcome Sanger Institute COVID-19 Surveillance Team                                                                                                                                                                                                                                                                                                                                                                      |
| EPL_ISL_704156                                                                                                                                                                 | Liverpool Clinical Laboratories                                                                           | COVID-19 Genomics UK (COG-UK) Consortium                                   | Sam Hadenby, Anita Lucad, Steve Paterson, Julian Hiscox, Alistair Darby, M Aimsaud, A Alvezzali, Muhammad Airuwalli, Stuart D Armstrong, Jones Benjamin, Eleanor G Bentley, Anu Chawla, Jordan J Clark, Angela Cawell, Richard Eccles, Isabel Garcia-Donval, Matthew Gemmill, Alessandro Gerada, PFK Gilmore, Richard Gregory, Ximeng Han, Catherine Hartley, Margaret Hughes, Miran Ijurza-Gomara, James Johnson, L. Liu, Jennifer Manson, Charlotte Nelson, Elaine O'Toole, Cassie Olatelu, Rebekah Penrice-Handel, Lucille Ranbow, N P Randle, Trevor Ian Robinson, Parul Sharma, Ghada T Shawli, James P Stewart, Neil Swainson, Ecaterina Varnos, Joanne Watts, Mark Whitehead |

|                                                                                                |                                                                                                           |                                                                            |                                                                                                                                                                                                                                                                                                                                                                                                                                                                                                                                                                                                                                                                                       |
|------------------------------------------------------------------------------------------------|-----------------------------------------------------------------------------------------------------------|----------------------------------------------------------------------------|---------------------------------------------------------------------------------------------------------------------------------------------------------------------------------------------------------------------------------------------------------------------------------------------------------------------------------------------------------------------------------------------------------------------------------------------------------------------------------------------------------------------------------------------------------------------------------------------------------------------------------------------------------------------------------------|
| EPI_ISL_704157                                                                                 | Lighthouse Lab in Glasgow                                                                                 | Wellcome Sanger Institute for the COVID-19 Genomics UK (COG-UK) Consortium | PFK Gilmore, Richard Gregory, Ximeng Han, Catherine Hartley, Margaret Hughes, Miran Iurriza-Gomara, James Johnson, L Liu, Jennifer Manson, Charlotte Nelson, Elaine O'Toole, Rebekah Penrice-Handel, Lucille Rahnlow, N P Randle, Trevor Ian Robinson, Parul Sharma, Ghada T Shawli, James P Stewart, Neil Swainson, Ecaterina Varnos, Joanne Waiats, Mark Whitehead                                                                                                                                                                                                                                                                                                                  |
| EPI_ISL_704161                                                                                 | Wales Specialist Virology Centre Sequencing lab: Pathogen Genomics Unit                                   | COVID-19 Genomics UK (COG-UK) Consortium                                   | Catherine Moore, Johnathan Evans, Laura Gifford, Malorie Perry, Simon Cottrell, Angela Marchbank, Alec Birchley, Alexander Adams, Amy Gaskin, Bree Gallica-Wilcox, Jason Coombes, Joel Soudrigat, Lauren Gilbert, Lee Graham, Nicole Pacharini, Sara Kunzraben-Sumnerhayes, Sarah Taylor, Sophie Jones, Sara Ray, Matthew Bull, Joanne Walkins, Sally Corden, Tom Connor                                                                                                                                                                                                                                                                                                              |
| EPI_ISL_704162, EPI_ISL_704164, EPI_ISL_704165, EPI_ISL_704167                                 | Lighthouse Lab in Glasgow                                                                                 | Wellcome Sanger Institute for the COVID-19 Genomics UK (COG-UK) Consortium | Happer VanSteenhouse, Yurni Kasai, David Gray, Carol Clugston, Anna Dominiczak and Alex Alderton, Roberto Amato, Sonia Goncalves, Ewan Harrison, David K, Jackson, Ian Johnston, Dominic Kwiatkowski, Cordelia Langford, John Sillitoe on behalf of the Wellcome Sanger Institute COVID-19 Surveillance Team                                                                                                                                                                                                                                                                                                                                                                          |
| EPI_ISL_704168                                                                                 | Liverpool Clinical Laboratories                                                                           | COVID-19 Genomics UK (COG-UK) Consortium                                   | Sam Hadenby, Anita Lucaci, Steve Paterson, Julian Hiscox, Alistair Darcy, M Almsaud, A Alvezalhi, Muhammad Alruwaili, Stuart D Armstrong, Jones Benjamin, Eleanor G Bentley, Anu Chawla, Jordan J Clark, Angela Cowell, Richard Eccles, Isabel Garcia-Dorval, Matthew Gemmill, Alessandro Gerada, PFK Gilmore, Richard Gregory, Ximeng Han, Catherine Hartley, Margaret Hughes, Miran Iurriza-Gomara, James Johnson, L Liu, Jennifer Manson, Charlotte Nelson, Elaine O'Toole, Cassie Orladi, Rebekah Penrice-Handel, Lucille Rahnlow, N P Randle, Trevor Ian Robinson, Parul Sharma, Ghada T Shawli, James P Stewart, Neil Swainson, Ecaterina Varnos, Joanne Waiats, Mark Whitehead |
| EPI_ISL_704170                                                                                 | Lighthouse Lab in Glasgow                                                                                 | Wellcome Sanger Institute for the COVID-19 Genomics UK (COG-UK) Consortium | Happer VanSteenhouse, Yurni Kasai, David Gray, Carol Clugston, Anna Dominiczak and Alex Alderton, Roberto Amato, Sonia Goncalves, Ewan Harrison, David K, Jackson, Ian Johnston, Dominic Kwiatkowski, Cordelia Langford, John Sillitoe on behalf of the Wellcome Sanger Institute COVID-19 Surveillance Team                                                                                                                                                                                                                                                                                                                                                                          |
| EPI_ISL_704171                                                                                 | Wales Specialist Virology Centre Sequencing lab: Pathogen Genomics Unit                                   | COVID-19 Genomics UK (COG-UK) Consortium                                   | Catherine Moore, Johnathan Evans, Laura Gifford, Malorie Perry, Simon Cottrell, Angela Marchbank, Alec Birchley, Alexander Adams, Amy Gaskin, Bree Gallica-Wilcox, Jason Coombes, Joel Soudrigat, Lauren Gilbert, Lee Graham, Nicole Pacharini, Sara Kunzraben-Sumnerhayes, Sarah Taylor, Sophie Jones, Sara Ray, Matthew Bull, Joanne Walkins, Sally Corden, Tom Connor                                                                                                                                                                                                                                                                                                              |
| EPI_ISL_704173, EPI_ISL_704177, EPI_ISL_704178, EPI_ISL_704182, EPI_ISL_704183, EPI_ISL_704185 | Lighthouse Lab in Glasgow                                                                                 | Wellcome Sanger Institute for the COVID-19 Genomics UK (COG-UK) Consortium | Happer VanSteenhouse, Yurni Kasai, David Gray, Carol Clugston, Anna Dominiczak and Alex Alderton, Roberto Amato, Sonia Goncalves, Ewan Harrison, David K, Jackson, Ian Johnston, Dominic Kwiatkowski, Cordelia Langford, John Sillitoe on behalf of the Wellcome Sanger Institute COVID-19 Surveillance Team                                                                                                                                                                                                                                                                                                                                                                          |
| EPI_ISL_704187                                                                                 | Wales Specialist Virology Centre Sequencing lab: Pathogen Genomics Unit                                   | COVID-19 Genomics UK (COG-UK) Consortium                                   | Catherine Moore, Johnathan Evans, Laura Gifford, Malorie Perry, Simon Cottrell, Angela Marchbank, Alec Birchley, Alexander Adams, Amy Gaskin, Bree Gallica-Wilcox, Jason Coombes, Joel Soudrigat, Lauren Gilbert, Lee Graham, Nicole Pacharini, Sara Kunzraben-Sumnerhayes, Sarah Taylor, Sophie Jones, Sara Ray, Matthew Bull, Joanne Walkins, Sally Corden, Tom Connor                                                                                                                                                                                                                                                                                                              |
| EPI_ISL_704192, EPI_ISL_704194                                                                 | Lighthouse Lab in Glasgow                                                                                 | Wellcome Sanger Institute for the COVID-19 Genomics UK (COG-UK) Consortium | McHugh M, Dewar R, Rooke S, Gallagher M, Balcazac C, O'Toole A, Scher E, Hill V, McCrone JT, Colquhoun R, Yu X, Jackson B, Rambaut A, Williams TC, Templeton K                                                                                                                                                                                                                                                                                                                                                                                                                                                                                                                        |
| EPI_ISL_704201                                                                                 | Liverpool Clinical Laboratories                                                                           | COVID-19 Genomics UK (COG-UK) Consortium                                   | Happer VanSteenhouse, Yurni Kasai, David Gray, Carol Clugston, Anna Dominiczak and Alex Alderton, Roberto Amato, Sonia Goncalves, Ewan Harrison, David K, Jackson, Ian Johnston, Dominic Kwiatkowski, Cordelia Langford, John Sillitoe on behalf of the Wellcome Sanger Institute COVID-19 Surveillance Team                                                                                                                                                                                                                                                                                                                                                                          |
| EPI_ISL_704202, EPI_ISL_704204, EPI_ISL_704205, EPI_ISL_704210, EPI_ISL_704211                 | Lighthouse Lab in Glasgow                                                                                 | Wellcome Sanger Institute for the COVID-19 Genomics UK (COG-UK) Consortium | Sam Hadenby, Anita Lucaci, Steve Paterson, Julian Hiscox, Alistair Darcy, M Almsaud, A Alvezalhi, Muhammad Alruwaili, Stuart D Armstrong, Jones Benjamin, Eleanor G Bentley, Anu Chawla, Jordan J Clark, Angela Cowell, Richard Eccles, Isabel Garcia-Dorval, Matthew Gemmill, Alessandro Gerada, PFK Gilmore, Richard Gregory, Ximeng Han, Catherine Hartley, Margaret Hughes, Miran Iurriza-Gomara, James Johnson, L Liu, Jennifer Manson, Charlotte Nelson, Elaine O'Toole, Cassie Orladi, Rebekah Penrice-Handel, Lucille Rahnlow, N P Randle, Trevor Ian Robinson, Parul Sharma, Ghada T Shawli, James P Stewart, Neil Swainson, Ecaterina Varnos, Joanne Waiats, Mark Whitehead |
| EPI_ISL_704217                                                                                 | Quadrant Institute Bioscience                                                                             | COVID-19 Genomics UK (COG-UK) Consortium                                   | Happer VanSteenhouse, Yurni Kasai, David Gray, Carol Clugston, Anna Dominiczak and Alex Alderton, Roberto Amato, Sonia Goncalves, Ewan Harrison, David K, Jackson, Ian Johnston, Dominic Kwiatkowski, Cordelia Langford, John Sillitoe on behalf of the Wellcome Sanger Institute COVID-19 Surveillance Team                                                                                                                                                                                                                                                                                                                                                                          |
| EPI_ISL_704218                                                                                 | Lighthouse Lab in Glasgow                                                                                 | Wellcome Sanger Institute for the COVID-19 Genomics UK (COG-UK) Consortium | Happer VanSteenhouse, Yurni Kasai, David Gray, Carol Clugston, Anna Dominiczak and Alex Alderton, Roberto Amato, Sonia Goncalves, Ewan Harrison, David K, Jackson, Ian Johnston, Dominic Kwiatkowski, Cordelia Langford, John Sillitoe on behalf of the Wellcome Sanger Institute COVID-19 Surveillance Team                                                                                                                                                                                                                                                                                                                                                                          |
| EPI_ISL_704219                                                                                 | Department of Pathology, University of Cambridge                                                          | COVID-19 Genomics UK (COG-UK) Consortium                                   | Aminu S, Jalun, Yasmin Chaudhry, Grant Hall, Iliana Georgina, Myra Hosnilo, Martin D, Curran, Malie Prickett, Surendra Parmar, Ian Goodfellow                                                                                                                                                                                                                                                                                                                                                                                                                                                                                                                                         |
| EPI_ISL_704221                                                                                 | Lighthouse Lab in Glasgow                                                                                 | Wellcome Sanger Institute for the COVID-19 Genomics UK (COG-UK) Consortium | Happer VanSteenhouse, Yurni Kasai, David Gray, Carol Clugston, Anna Dominiczak and Alex Alderton, Roberto Amato, Sonia Goncalves, Ewan Harrison, David K, Jackson, Ian Johnston, Dominic Kwiatkowski, Cordelia Langford, John Sillitoe on behalf of the Wellcome Sanger Institute COVID-19 Surveillance Team                                                                                                                                                                                                                                                                                                                                                                          |
| EPI_ISL_704222                                                                                 | Department of Pathology, University of Cambridge                                                          | COVID-19 Genomics UK (COG-UK) Consortium                                   | Aminu S, Jalun, Yasmin Chaudhry, Grant Hall, Iliana Georgina, Myra Hosnilo, Martin D, Curran, Malie Prickett, Surendra Parmar, Ian Goodfellow                                                                                                                                                                                                                                                                                                                                                                                                                                                                                                                                         |
| EPI_ISL_704223                                                                                 | Lighthouse Lab in Glasgow                                                                                 | Wellcome Sanger Institute for the COVID-19 Genomics UK (COG-UK) Consortium | Happer VanSteenhouse, Yurni Kasai, David Gray, Carol Clugston, Anna Dominiczak and Alex Alderton, Roberto Amato, Sonia Goncalves, Ewan Harrison, David K, Jackson, Ian Johnston, Dominic Kwiatkowski, Cordelia Langford, John Sillitoe on behalf of the Wellcome Sanger Institute COVID-19 Surveillance Team                                                                                                                                                                                                                                                                                                                                                                          |
| EPI_ISL_704228                                                                                 | West of Scotland Specialist Virology Centre, NHSGGC / MHC-University of Glasgow Centre for Virus Research | COVID-19 Genomics UK (COG-UK) Consortium                                   | Ana da Silva Filipe, Natasha Johnson, Kathy Snodgett, Daniel Meri, Stephen Carmichael, Alice Brooks, Lily Tong, Jenna Nichols, Kyriaki Donikou, Sarah McDoonard, Richard Orron, Joseph Hughes, Steven Vekrellis, David L Robinson, Alastair Maclean, Rory Gunnson, Shiraz Shaaban, Matthew Holden, Rachel Blazow, Guy Mollart, Kathy U, James Shephard, Antonia Ho, Emma Thurrow                                                                                                                                                                                                                                                                                                      |
| EPI_ISL_704231                                                                                 | Liverpool Clinical Laboratories                                                                           | COVID-19 Genomics UK (COG-UK) Consortium                                   | Sam Hadenby, Anita Lucaci, Steve Paterson, Julian Hiscox, Alistair Darcy, M Almsaud, A Alvezalhi, Muhammad Alruwaili, Stuart D Armstrong, Jones Benjamin, Eleanor G Bentley, Anu Chawla, Jordan J Clark, Angela Cowell, Richard Eccles, Isabel Garcia-Dorval, Matthew Gemmill, Alessandro Gerada, PFK Gilmore, Richard Gregory, Ximeng Han, Catherine Hartley, Margaret Hughes, Miran Iurriza-Gomara, James Johnson, L Liu, Jennifer Manson, Charlotte Nelson, Elaine O'Toole, Cassie Orladi, Rebekah Penrice-Handel, Lucille Rahnlow, N P Randle, Trevor Ian Robinson, Parul Sharma, Ghada T Shawli, James P Stewart, Neil Swainson, Ecaterina Varnos, Joanne Waiats, Mark Whitehead |
| EPI_ISL_704232                                                                                 | Lighthouse Lab in Glasgow                                                                                 | Wellcome Sanger Institute for the COVID-19 Genomics UK (COG-UK) Consortium | Happer VanSteenhouse, Yurni Kasai, David Gray, Carol Clugston, Anna Dominiczak and Alex Alderton, Roberto Amato, Sonia Goncalves, Ewan Harrison, David K, Jackson, Ian Johnston, Dominic Kwiatkowski, Cordelia Langford, John Sillitoe on behalf of the Wellcome Sanger Institute COVID-19 Surveillance Team                                                                                                                                                                                                                                                                                                                                                                          |
| EPI_ISL_704233                                                                                 | Quadrant Institute Bioscience                                                                             | COVID-19 Genomics UK (COG-UK) Consortium                                   | Happer VanSteenhouse, Yurni Kasai, David Gray, Carol Clugston, Anna Dominiczak and Alex Alderton, Roberto Amato, Sonia Goncalves, Ewan Harrison, David K, Jackson, Ian Johnston, Dominic Kwiatkowski, Cordelia Langford, John Sillitoe on behalf of the Wellcome Sanger Institute COVID-19 Surveillance Team                                                                                                                                                                                                                                                                                                                                                                          |
| EPI_ISL_704234                                                                                 | Lighthouse Lab in Glasgow                                                                                 | Wellcome Sanger Institute for the COVID-19 Genomics UK (COG-UK) Consortium | Happer VanSteenhouse, Yurni Kasai, David Gray, Carol Clugston, Anna Dominiczak and Alex Alderton, Roberto Amato, Sonia Goncalves, Ewan Harrison, David K, Jackson, Ian Johnston, Dominic Kwiatkowski, Cordelia Langford, John Sillitoe on behalf of the Wellcome Sanger Institute COVID-19 Surveillance Team                                                                                                                                                                                                                                                                                                                                                                          |
| EPI_ISL_704236, EPI_ISL_704238                                                                 | Quadrant Institute Bioscience                                                                             | COVID-19 Genomics UK (COG-UK) Consortium                                   | Dave J Baker, Gemma L Kay, Alp Aydin, Thanh Le-Viet, Steven Rudder, Ana P, Tedin, Anastasia Kolyva, Maria Diaz, Leonardo de Oliveira Martins, Nabil-Fareed Alkhatib, Lizzie Meadows, Rachael Stanley, Ngzot Eurnogo, Muhammad Yasir, Nicholas M, Thomson, Alexander J, Trotter, Rachel Gilroy, Samuel Bloomfield, Claire Stuart, Andrew Bell, Reemesh Prakash, Sami Dervisevic, Alison E, Mather, John Wain, Mark Webber, Andrew J, Page, Justin O'Grady                                                                                                                                                                                                                              |

|                                                                                                                                                                                                                                                                                                |                                                                                                                                                                |                                                                            |                                                                                                                                                                                                                                                                                                                                                                                                                                                                                                                                                                                                                                                                                      |
|------------------------------------------------------------------------------------------------------------------------------------------------------------------------------------------------------------------------------------------------------------------------------------------------|----------------------------------------------------------------------------------------------------------------------------------------------------------------|----------------------------------------------------------------------------|--------------------------------------------------------------------------------------------------------------------------------------------------------------------------------------------------------------------------------------------------------------------------------------------------------------------------------------------------------------------------------------------------------------------------------------------------------------------------------------------------------------------------------------------------------------------------------------------------------------------------------------------------------------------------------------|
| EPI_ISL_704240                                                                                                                                                                                                                                                                                 | Lighthouse Lab in Glasgow                                                                                                                                      | Wellcome Sanger Institute for the COVID-19 Genomics UK (COG-UK) Consortium | Samuel Bloomfield, Claire Stuart, Andrew Bell, Feenesh Prakash, Sami Dervisevic, Alison E. Mather, John Wain, Mark Webber, Andrew J. Page, Justin O'Grady                                                                                                                                                                                                                                                                                                                                                                                                                                                                                                                            |
| EPI_ISL_704241                                                                                                                                                                                                                                                                                 | Quadram Institute Bioscience                                                                                                                                   | COVID-19 Genomics UK (COG-UK) Consortium                                   | Dave J. Baker, Gemma L. Kay, Alp Aydin, Thanh Le-Viet, Steven Rudder, Ana P. Tedim, Anastasia Kojva, Maria Diaz, Leonardo de Oliveira Martins, Nabil-Fareed Alkhatib, Lizzie Meadows, Fachiha Stanley, Nguzi Elmurogo, Muhammad Yasir, Nicholas M. Thomson, Alexander J. Trotter, Rachel Gilroy, Samuel Bloomfield, Claire Stuart, Andrew Bell, Feenesh Prakash, Sami Dervisevic, Alison E. Mather, John Wain, Mark Webber, Andrew J. Page, Justin O'Grady                                                                                                                                                                                                                           |
| EPI_ISL_704243                                                                                                                                                                                                                                                                                 | Centre for Enzyme Innovation, University of Portsmouth / Translational Research Laboratory, Portsmouth Hospitals NHS Trust                                     | COVID-19 Genomics UK (COG-UK) Consortium                                   | Angela Beckett, Yann Bougeois, Garry Scarlett, Sharon Glaysher, Scott Elliott, Kelly Becknell, Robert Impey, Alyson Lloyd, Sarah Wylie, Ethan Butler, Anoop Chauhan, Samuel Robson                                                                                                                                                                                                                                                                                                                                                                                                                                                                                                   |
| EPI_ISL_704248, EPI_ISL_704251, EPI_ISL_704254, EPI_ISL_704256, EPI_ISL_704259                                                                                                                                                                                                                 | Lighthouse Lab in Glasgow                                                                                                                                      | Wellcome Sanger Institute for the COVID-19 Genomics UK (COG-UK) Consortium | Haper VanSteerhouse, Yurni Kasai, David Gray, Carol Clugston, Anna Dominiczak and Alex Alderton, Roberto Amato, Sonia Goncalves, Ewan Harrison, David K. Jackson, Ian Johnston, Dominic Kwiatkowski, Cordelia Langford, John Sillito on behalf of the Wellcome Sanger Institute COVID-19 Surveillance Team                                                                                                                                                                                                                                                                                                                                                                           |
| EPI_ISL_704260                                                                                                                                                                                                                                                                                 | Liverpool Clinical Laboratories                                                                                                                                | COVID-19 Genomics UK (COG-UK) Consortium                                   | Sam Haddenby, Anita Lucaci, Steve Paterson, Julian Hiscox, Alistair Darby, M Almsaudi, A Alvezhali, Muhammad Atirwail, Stuart D Armstrong, Jones Benjamin, Eleanor G Bentley, Anu Charwal, Jordan J Clark, Angela Cowell, Richard Eccles, Isabel Garcia-Donval, Matthew Gemmill, Alessandro Gerada, PFK Gilmore, Richard Gregory, Ximeng Han, Catherine Hartley, Margaret Hughes, Miran Juriza-Gomara, James Johnson, L Luu, Jennifer Manson, Charlotte Nelson, Elaine O'Toole, Cassie O'Leary, Rebekah Parrice-Handel, Lucile Rambow, N P Randie, Trevor Ian Robinson, Parul Sharma, Ghada T Shawil, James P Stewart, Neil Swainson, Ecaterina Varnos, Joanna Watts, Mart Whitehead |
| EPI_ISL_704261                                                                                                                                                                                                                                                                                 | Lighthouse Lab in Glasgow                                                                                                                                      | Wellcome Sanger Institute for the COVID-19 Genomics UK (COG-UK) Consortium | Haper VanSteerhouse, Yurni Kasai, David Gray, Carol Clugston, Anna Dominiczak and Alex Alderton, Roberto Amato, Sonia Goncalves, Ewan Harrison, David K. Jackson, Ian Johnston, Dominic Kwiatkowski, Cordelia Langford, John Sillito on behalf of the Wellcome Sanger Institute COVID-19 Surveillance Team                                                                                                                                                                                                                                                                                                                                                                           |
| EPI_ISL_704262                                                                                                                                                                                                                                                                                 | Northumbria University / South Tees Hospitals NHS Foundation Trust / North Tees and Hartlepool NHS Foundation Trust / Newcastle Hospitals NHS Foundation Trust | COVID-19 Genomics UK (COG-UK) Consortium                                   | Darren L Smith, Andrew Nelson, Matthew Bashon, Greg R Young, Joshua Lon, John Allen, Mohammad A Tariq, Giles S Holt, Gary Black, Wen C Yew, Lynn Dover, Paul Baker, Steve Liggett, Sarah Essex, Jane Essex, Jane Padgett, Clive Graham, Garraen Scott, Edward Barton, Emma Swindells, Brendan Payne, Jennifer Collins, Yusra Talha, Gary Ellingham                                                                                                                                                                                                                                                                                                                                   |
| EPI_ISL_704263, EPI_ISL_704265                                                                                                                                                                                                                                                                 | Lighthouse Lab in Glasgow                                                                                                                                      | Wellcome Sanger Institute for the COVID-19 Genomics UK (COG-UK) Consortium | Haper VanSteerhouse, Yurni Kasai, David Gray, Carol Clugston, Anna Dominiczak and Alex Alderton, Roberto Amato, Sonia Goncalves, Ewan Harrison, David K. Jackson, Ian Johnston, Dominic Kwiatkowski, Cordelia Langford, John Sillito on behalf of the Wellcome Sanger Institute COVID-19 Surveillance Team                                                                                                                                                                                                                                                                                                                                                                           |
| EPI_ISL_704269                                                                                                                                                                                                                                                                                 | Department of Pathology, University of Cambridge                                                                                                               | COVID-19 Genomics UK (COG-UK) Consortium                                   | Aminu S. Jahun, Yasmin Chaudhry, Grant Hall, Iliana Georgiana, Myra Hosnilo, Martin D. Curran, Malte Prickett, Surendra Parmar, Ian Goodfellow                                                                                                                                                                                                                                                                                                                                                                                                                                                                                                                                       |
| EPI_ISL_704272                                                                                                                                                                                                                                                                                 | Lighthouse Lab in Glasgow                                                                                                                                      | Wellcome Sanger Institute for the COVID-19 Genomics UK (COG-UK) Consortium | Haper VanSteerhouse, Yurni Kasai, David Gray, Carol Clugston, Anna Dominiczak and Alex Alderton, Roberto Amato, Sonia Goncalves, Ewan Harrison, David K. Jackson, Ian Johnston, Dominic Kwiatkowski, Cordelia Langford, John Sillito on behalf of the Wellcome Sanger Institute COVID-19 Surveillance Team                                                                                                                                                                                                                                                                                                                                                                           |
| EPI_ISL_704273                                                                                                                                                                                                                                                                                 | Department of Pathology, University of Cambridge                                                                                                               | COVID-19 Genomics UK (COG-UK) Consortium                                   | Aminu S. Jahun, Yasmin Chaudhry, Grant Hall, Iliana Georgiana, Myra Hosnilo, Martin D. Curran, Malte Prickett, Surendra Parmar, Ian Goodfellow                                                                                                                                                                                                                                                                                                                                                                                                                                                                                                                                       |
| EPI_ISL_704275                                                                                                                                                                                                                                                                                 | Lighthouse Lab in Glasgow                                                                                                                                      | Wellcome Sanger Institute for the COVID-19 Genomics UK (COG-UK) Consortium | Haper VanSteerhouse, Yurni Kasai, David Gray, Carol Clugston, Anna Dominiczak and Alex Alderton, Roberto Amato, Sonia Goncalves, Ewan Harrison, David K. Jackson, Ian Johnston, Dominic Kwiatkowski, Cordelia Langford, John Sillito on behalf of the Wellcome Sanger Institute COVID-19 Surveillance Team                                                                                                                                                                                                                                                                                                                                                                           |
| EPI_ISL_704276                                                                                                                                                                                                                                                                                 | Department of Pathology, University of Cambridge                                                                                                               | COVID-19 Genomics UK (COG-UK) Consortium                                   | Aminu S. Jahun, Yasmin Chaudhry, Grant Hall, Iliana Georgiana, Myra Hosnilo, Martin D. Curran, Malte Prickett, Surendra Parmar, Ian Goodfellow                                                                                                                                                                                                                                                                                                                                                                                                                                                                                                                                       |
| EPI_ISL_704277, EPI_ISL_704278                                                                                                                                                                                                                                                                 | Lighthouse Lab in Glasgow                                                                                                                                      | Wellcome Sanger Institute for the COVID-19 Genomics UK (COG-UK) Consortium | Haper VanSteerhouse, Yurni Kasai, David Gray, Carol Clugston, Anna Dominiczak and Alex Alderton, Roberto Amato, Sonia Goncalves, Ewan Harrison, David K. Jackson, Ian Johnston, Dominic Kwiatkowski, Cordelia Langford, John Sillito on behalf of the Wellcome Sanger Institute COVID-19 Surveillance Team                                                                                                                                                                                                                                                                                                                                                                           |
| EPI_ISL_704280, EPI_ISL_704283, EPI_ISL_704286, EPI_ISL_704297                                                                                                                                                                                                                                 | Department of Pathology, University of Cambridge                                                                                                               | COVID-19 Genomics UK (COG-UK) Consortium                                   | Haper VanSteerhouse, Yurni Kasai, David Gray, Carol Clugston, Anna Dominiczak and Alex Alderton, Roberto Amato, Sonia Goncalves, Ewan Harrison, David K. Jackson, Ian Johnston, Dominic Kwiatkowski, Cordelia Langford, John Sillito on behalf of the Wellcome Sanger Institute COVID-19 Surveillance Team                                                                                                                                                                                                                                                                                                                                                                           |
| EPI_ISL_704298                                                                                                                                                                                                                                                                                 | Lighthouse Lab in Glasgow                                                                                                                                      | Wellcome Sanger Institute for the COVID-19 Genomics UK (COG-UK) Consortium | Aminu S. Jahun, Yasmin Chaudhry, Grant Hall, Iliana Georgiana, Myra Hosnilo, Martin D. Curran, Malte Prickett, Surendra Parmar, Ian Goodfellow                                                                                                                                                                                                                                                                                                                                                                                                                                                                                                                                       |
| EPI_ISL_704302, EPI_ISL_704305, EPI_ISL_704307                                                                                                                                                                                                                                                 | Department of Pathology, University of Cambridge                                                                                                               | COVID-19 Genomics UK (COG-UK) Consortium                                   | Haper VanSteerhouse, Yurni Kasai, David Gray, Carol Clugston, Anna Dominiczak and Alex Alderton, Roberto Amato, Sonia Goncalves, Ewan Harrison, David K. Jackson, Ian Johnston, Dominic Kwiatkowski, Cordelia Langford, John Sillito on behalf of the Wellcome Sanger Institute COVID-19 Surveillance Team                                                                                                                                                                                                                                                                                                                                                                           |
| EPI_ISL_704308                                                                                                                                                                                                                                                                                 | Lighthouse Lab in Glasgow                                                                                                                                      | Wellcome Sanger Institute for the COVID-19 Genomics UK (COG-UK) Consortium | Aminu S. Jahun, Yasmin Chaudhry, Grant Hall, Iliana Georgiana, Myra Hosnilo, Martin D. Curran, Malte Prickett, Surendra Parmar, Ian Goodfellow                                                                                                                                                                                                                                                                                                                                                                                                                                                                                                                                       |
| EPI_ISL_704309                                                                                                                                                                                                                                                                                 | Department of Pathology, University of Cambridge                                                                                                               | COVID-19 Genomics UK (COG-UK) Consortium                                   | Aminu S. Jahun, Yasmin Chaudhry, Grant Hall, Iliana Georgiana, Myra Hosnilo, Martin D. Curran, Malte Prickett, Surendra Parmar, Ian Goodfellow                                                                                                                                                                                                                                                                                                                                                                                                                                                                                                                                       |
| EPI_ISL_704313                                                                                                                                                                                                                                                                                 | Lighthouse Lab in Glasgow                                                                                                                                      | Wellcome Sanger Institute for the COVID-19 Genomics UK (COG-UK) Consortium | Haper VanSteerhouse, Yurni Kasai, David Gray, Carol Clugston, Anna Dominiczak and Alex Alderton, Roberto Amato, Sonia Goncalves, Ewan Harrison, David K. Jackson, Ian Johnston, Dominic Kwiatkowski, Cordelia Langford, John Sillito on behalf of the Wellcome Sanger Institute COVID-19 Surveillance Team                                                                                                                                                                                                                                                                                                                                                                           |
| EPI_ISL_704315                                                                                                                                                                                                                                                                                 | Queens Medical Centre, Clinical Microbiology Department / DeepSeq Nottingham                                                                                   | COVID-19 Genomics UK (COG-UK) Consortium                                   | Gemma Clark, Wendy Smith, Manjinder Khakh, Viki M Fleming, Michelle M Later, Hannah Howson-Wells, Jonathan Ball, Patrick McClure, Joseph Chappell, Theodoras Tsolendis, Nadine Holmes, Matthew Carlisle, Christopher Moore, Fei Sang, Johnny Debebe, Victoria Wright, Matthew Loose                                                                                                                                                                                                                                                                                                                                                                                                  |
| EPI_ISL_704316, EPI_ISL_704318, EPI_ISL_704319                                                                                                                                                                                                                                                 | Lighthouse Lab in Glasgow                                                                                                                                      | Wellcome Sanger Institute for the COVID-19 Genomics UK (COG-UK) Consortium | Haper VanSteerhouse, Yurni Kasai, David Gray, Carol Clugston, Anna Dominiczak and Alex Alderton, Roberto Amato, Sonia Goncalves, Ewan Harrison, David K. Jackson, Ian Johnston, Dominic Kwiatkowski, Cordelia Langford, John Sillito on behalf of the Wellcome Sanger Institute COVID-19 Surveillance Team                                                                                                                                                                                                                                                                                                                                                                           |
| EPI_ISL_704320                                                                                                                                                                                                                                                                                 | Wales Specialist Virology Centre Sequencing lab: Pathogen Genomics Unit                                                                                        | COVID-19 Genomics UK (COG-UK) Consortium                                   | Catherine Moore, Johnathan Evans, Laura Gifford, Malorie Parry, Simon Cottrell, Angela Marchbank, Alec Birchley, Alexander Adams, Amy Gaskin, Bree Galica-Wilcox, Jason Coombes, Joel Southgate, Lauren Gilbert, Lee Graham, Nicole Paschianri, Sara Kunzans-Summerhayes, Sarah Taylor, Sophie Jones, Sara Ray, Matthew Bill, Joanna Walkins, Sally Cordean, Tom Connor                                                                                                                                                                                                                                                                                                              |
| EPI_ISL_704321                                                                                                                                                                                                                                                                                 | Lighthouse Lab in Glasgow                                                                                                                                      | Wellcome Sanger Institute for the COVID-19 Genomics UK (COG-UK) Consortium | Haper VanSteerhouse, Yurni Kasai, David Gray, Carol Clugston, Anna Dominiczak and Alex Alderton, Roberto Amato, Sonia Goncalves, Ewan Harrison, David K. Jackson, Ian Johnston, Dominic Kwiatkowski, Cordelia Langford, John Sillito on behalf of the Wellcome Sanger Institute COVID-19 Surveillance Team                                                                                                                                                                                                                                                                                                                                                                           |
| EPI_ISL_704322, EPI_ISL_704325                                                                                                                                                                                                                                                                 | Centre for Enzyme Innovation, University of Portsmouth / Translational Research Laboratory, Portsmouth Hospitals NHS Trust                                     | COVID-19 Genomics UK (COG-UK) Consortium                                   | Angela Beckett, Yann Bougeois, Garry Scarlett, Sharon Glaysher, Scott Elliott, Kelly Becknell, Robert Impey, Alyson Lloyd, Sarah Wylie, Ethan Butler, Anoop Chauhan, Samuel Robson                                                                                                                                                                                                                                                                                                                                                                                                                                                                                                   |
| EPI_ISL_704326, EPI_ISL_704330, EPI_ISL_704335, EPI_ISL_704340, EPI_ISL_704345, EPI_ISL_704348, EPI_ISL_704349, EPI_ISL_704351, EPI_ISL_704354, EPI_ISL_704355, EPI_ISL_704357, EPI_ISL_704362, EPI_ISL_704365, EPI_ISL_704368, EPI_ISL_704370, EPI_ISL_704376, EPI_ISL_704380, EPI_ISL_704383 | Lighthouse Lab in Glasgow                                                                                                                                      | Wellcome Sanger Institute for the COVID-19 Genomics UK (COG-UK) Consortium | Haper VanSteerhouse, Yurni Kasai, David Gray, Carol Clugston, Anna Dominiczak and Alex Alderton, Roberto Amato, Sonia Goncalves, Ewan Harrison, David K. Jackson, Ian Johnston, Dominic Kwiatkowski, Cordelia Langford, John Sillito on behalf of the Wellcome Sanger Institute COVID-19 Surveillance Team                                                                                                                                                                                                                                                                                                                                                                           |



|                                                                                                                                                                                                                                                                                                                                |                                                                                                                                                                                                                     |                                                                            |                                                                                                                                                                                                                                                                                                                                                                                                                                                                                                                                                                                                                                                                                      |
|--------------------------------------------------------------------------------------------------------------------------------------------------------------------------------------------------------------------------------------------------------------------------------------------------------------------------------|---------------------------------------------------------------------------------------------------------------------------------------------------------------------------------------------------------------------|----------------------------------------------------------------------------|--------------------------------------------------------------------------------------------------------------------------------------------------------------------------------------------------------------------------------------------------------------------------------------------------------------------------------------------------------------------------------------------------------------------------------------------------------------------------------------------------------------------------------------------------------------------------------------------------------------------------------------------------------------------------------------|
| EPI_ISL_704518                                                                                                                                                                                                                                                                                                                 | Department of Pathology, University of Cambridge                                                                                                                                                                    | COVID-19 Genomics UK (COG-UK) Consortium                                   | Aminu S. Jaitun, Yasmin Chaudhry, Grant Hall, Iliana Georgiana, Myra Hosnilo, Martin D. Curran, Malte Plockert, Surendra Parmar, Ian Goodfellow                                                                                                                                                                                                                                                                                                                                                                                                                                                                                                                                      |
| EPI_ISL_704523                                                                                                                                                                                                                                                                                                                 | Lighthouse Lab in Glasgow                                                                                                                                                                                           | Wellcome Sanger Institute for the COVID-19 Genomics UK (COG-UK) Consortium | Happer VanSteerthouse, Yurni Kasali, David Gray, Carol Clugston, Anna Dominiczak and Alex Alderton, Roberto Amato, Sonia Goncalves, Ewan Harrison, David K. Jackson, Ian Johnston, Dominic Kwiatkowski, Cordella Langford, John Sillitoe on behalf of the Wellcome Sanger Institute COVID-19 Surveillance Team                                                                                                                                                                                                                                                                                                                                                                       |
| EPI_ISL_704524                                                                                                                                                                                                                                                                                                                 | Department of Pathology, University of Cambridge                                                                                                                                                                    | COVID-19 Genomics UK (COG-UK) Consortium                                   | Aminu S. Jaitun, Yasmin Chaudhry, Grant Hall, Iliana Georgiana, Myra Hosnilo, Martin D. Curran, Malte Plockert, Surendra Parmar, Ian Goodfellow                                                                                                                                                                                                                                                                                                                                                                                                                                                                                                                                      |
| EPI_ISL_704525, EPI_ISL_704527, EPI_ISL_704530, EPI_ISL_704534, EPI_ISL_704536, EPI_ISL_704544, EPI_ISL_704546, EPI_ISL_704547, EPI_ISL_704550                                                                                                                                                                                 | Lighthouse Lab in Glasgow                                                                                                                                                                                           | Wellcome Sanger Institute for the COVID-19 Genomics UK (COG-UK) Consortium | Happer VanSteerthouse, Yurni Kasali, David Gray, Carol Clugston, Anna Dominiczak and Alex Alderton, Roberto Amato, Sonia Goncalves, Ewan Harrison, David K. Jackson, Ian Johnston, Dominic Kwiatkowski, Cordella Langford, John Sillitoe on behalf of the Wellcome Sanger Institute COVID-19 Surveillance Team                                                                                                                                                                                                                                                                                                                                                                       |
| EPI_ISL_704551                                                                                                                                                                                                                                                                                                                 | Department of Pathology, University of Cambridge                                                                                                                                                                    | COVID-19 Genomics UK (COG-UK) Consortium                                   | Aminu S. Jaitun, Yasmin Chaudhry, Grant Hall, Iliana Georgiana, Myra Hosnilo, Martin D. Curran, Malte Plockert, Surendra Parmar, Ian Goodfellow                                                                                                                                                                                                                                                                                                                                                                                                                                                                                                                                      |
| EPI_ISL_704552, EPI_ISL_704556                                                                                                                                                                                                                                                                                                 | Lighthouse Lab in Glasgow                                                                                                                                                                                           | Wellcome Sanger Institute for the COVID-19 Genomics UK (COG-UK) Consortium | Happer VanSteerthouse, Yurni Kasali, David Gray, Carol Clugston, Anna Dominiczak and Alex Alderton, Roberto Amato, Sonia Goncalves, Ewan Harrison, David K. Jackson, Ian Johnston, Dominic Kwiatkowski, Cordella Langford, John Sillitoe on behalf of the Wellcome Sanger Institute COVID-19 Surveillance Team                                                                                                                                                                                                                                                                                                                                                                       |
| EPI_ISL_704559                                                                                                                                                                                                                                                                                                                 | Victory Department, Royal Infirmary of Edinburgh, NHS Lothian / School of Biological Sciences, University of Edinburgh / Institute of Genetics and Molecular Medicine, University of Edinburgh                      | COVID-19 Genomics UK (COG-UK) Consortium                                   | Mchughn M, Dewar R, Rooke S, Gallagher M, Balazca C, O'Toole A, Soper E, Hill V, McCrone JT, Colquhoun R, Yu X, Jackson B, Rambaut A, Williams TC, Templeton K                                                                                                                                                                                                                                                                                                                                                                                                                                                                                                                       |
| EPI_ISL_704561                                                                                                                                                                                                                                                                                                                 | Lighthouse Lab in Glasgow                                                                                                                                                                                           | Wellcome Sanger Institute for the COVID-19 Genomics UK (COG-UK) Consortium | Happer VanSteerthouse, Yurni Kasali, David Gray, Carol Clugston, Anna Dominiczak and Alex Alderton, Roberto Amato, Sonia Goncalves, Ewan Harrison, David K. Jackson, Ian Johnston, Dominic Kwiatkowski, Cordella Langford, John Sillitoe on behalf of the Wellcome Sanger Institute COVID-19 Surveillance Team                                                                                                                                                                                                                                                                                                                                                                       |
| EPI_ISL_704564                                                                                                                                                                                                                                                                                                                 | Northumbria University / South Tees Hospitals NHS Foundation Trust / North Cumbria Integrated Care NHS Foundation Trust / North Tees and Hartlepool NHS Foundation Trust / Newcastle Hospitals NHS Foundation Trust | COVID-19 Genomics UK (COG-UK) Consortium                                   | Darren L Smith, Andrew Nelson, Matthew Bastion, Greg R Young, Joshua Loh, John Allan, Mohammad A Tariq, Giles S Holt, Gary Black, Wen C Yew, Lynn Dove, Paul Baker, Steve Liggitt, Sarah Essex, Jane Payne, Jennifer Collins, Yusra Tahra, Gary Eltringham                                                                                                                                                                                                                                                                                                                                                                                                                           |
| EPI_ISL_704565, EPI_ISL_704566                                                                                                                                                                                                                                                                                                 | Lighthouse Lab in Glasgow                                                                                                                                                                                           | Wellcome Sanger Institute for the COVID-19 Genomics UK (COG-UK) Consortium | Happer VanSteerthouse, Yurni Kasali, David Gray, Carol Clugston, Anna Dominiczak and Alex Alderton, Roberto Amato, Sonia Goncalves, Ewan Harrison, David K. Jackson, Ian Johnston, Dominic Kwiatkowski, Cordella Langford, John Sillitoe on behalf of the Wellcome Sanger Institute COVID-19 Surveillance Team                                                                                                                                                                                                                                                                                                                                                                       |
| EPI_ISL_704567                                                                                                                                                                                                                                                                                                                 | Northumbria University / South Tees Hospitals NHS Foundation Trust / North Cumbria Integrated Care NHS Foundation Trust / North Tees and Hartlepool NHS Foundation Trust / Newcastle Hospitals NHS Foundation Trust | COVID-19 Genomics UK (COG-UK) Consortium                                   | Darren L Smith, Andrew Nelson, Matthew Bastion, Greg R Young, Joshua Loh, John Allan, Mohammad A Tariq, Giles S Holt, Gary Black, Wen C Yew, Lynn Dove, Paul Baker, Steve Liggitt, Sarah Essex, Jane Payne, Jennifer Collins, Yusra Tahra, Gary Eltringham                                                                                                                                                                                                                                                                                                                                                                                                                           |
| EPI_ISL_704568, EPI_ISL_704569                                                                                                                                                                                                                                                                                                 | Lighthouse Lab in Glasgow                                                                                                                                                                                           | Wellcome Sanger Institute for the COVID-19 Genomics UK (COG-UK) Consortium | Happer VanSteerthouse, Yurni Kasali, David Gray, Carol Clugston, Anna Dominiczak and Alex Alderton, Roberto Amato, Sonia Goncalves, Ewan Harrison, David K. Jackson, Ian Johnston, Dominic Kwiatkowski, Cordella Langford, John Sillitoe on behalf of the Wellcome Sanger Institute COVID-19 Surveillance Team                                                                                                                                                                                                                                                                                                                                                                       |
| EPI_ISL_704570                                                                                                                                                                                                                                                                                                                 | Northumbria University / South Tees Hospitals NHS Foundation Trust / North Cumbria Integrated Care NHS Foundation Trust / North Tees and Hartlepool NHS Foundation Trust / Newcastle Hospitals NHS Foundation Trust | COVID-19 Genomics UK (COG-UK) Consortium                                   | Darren L Smith, Andrew Nelson, Matthew Bastion, Greg R Young, Joshua Loh, John Allan, Mohammad A Tariq, Giles S Holt, Gary Black, Wen C Yew, Lynn Dove, Paul Baker, Steve Liggitt, Sarah Essex, Jane Payne, Jennifer Collins, Yusra Tahra, Gary Eltringham                                                                                                                                                                                                                                                                                                                                                                                                                           |
| EPI_ISL_704571                                                                                                                                                                                                                                                                                                                 | Lighthouse Lab in Glasgow                                                                                                                                                                                           | Wellcome Sanger Institute for the COVID-19 Genomics UK (COG-UK) Consortium | Happer VanSteerthouse, Yurni Kasali, David Gray, Carol Clugston, Anna Dominiczak and Alex Alderton, Roberto Amato, Sonia Goncalves, Ewan Harrison, David K. Jackson, Ian Johnston, Dominic Kwiatkowski, Cordella Langford, John Sillitoe on behalf of the Wellcome Sanger Institute COVID-19 Surveillance Team                                                                                                                                                                                                                                                                                                                                                                       |
| EPI_ISL_704572, EPI_ISL_704574, EPI_ISL_704579                                                                                                                                                                                                                                                                                 | Northumbria University / South Tees Hospitals NHS Foundation Trust / North Cumbria Integrated Care NHS Foundation Trust / North Tees and Hartlepool NHS Foundation Trust / Newcastle Hospitals NHS Foundation Trust | COVID-19 Genomics UK (COG-UK) Consortium                                   | Darren L Smith, Andrew Nelson, Matthew Bastion, Greg R Young, Joshua Loh, John Allan, Mohammad A Tariq, Giles S Holt, Gary Black, Wen C Yew, Lynn Dove, Paul Baker, Steve Liggitt, Sarah Essex, Jane Payne, Jennifer Collins, Yusra Tahra, Gary Eltringham                                                                                                                                                                                                                                                                                                                                                                                                                           |
| EPI_ISL_704588                                                                                                                                                                                                                                                                                                                 | Centre for Enzyme Innovation, University of Portsmouth / Translational Research Laboratory, Portsmouth Hospitals NHS Trust                                                                                          | COVID-19 Genomics UK (COG-UK) Consortium                                   | Angela Beckett, Yann Bourgeois, Garry Scarlett, Sharon Glyashter, Scott Elliott, Kelly Becknell, Robert Impey, Alyson Lloyd, Sarah Wylie, Ethan Butcher, Anoop Chauhan, Samuel Hoosen                                                                                                                                                                                                                                                                                                                                                                                                                                                                                                |
| EPI_ISL_704642, EPI_ISL_704644, EPI_ISL_704645, EPI_ISL_704658, EPI_ISL_704661, EPI_ISL_704670, EPI_ISL_704672, EPI_ISL_704675, EPI_ISL_704677, EPI_ISL_704680, EPI_ISL_704681                                                                                                                                                 | Lighthouse Lab in Glasgow                                                                                                                                                                                           | Wellcome Sanger Institute for the COVID-19 Genomics UK (COG-UK) Consortium | Happer VanSteerthouse, Yurni Kasali, David Gray, Carol Clugston, Anna Dominiczak and Alex Alderton, Roberto Amato, Sonia Goncalves, Ewan Harrison, David K. Jackson, Ian Johnston, Dominic Kwiatkowski, Cordella Langford, John Sillitoe on behalf of the Wellcome Sanger Institute COVID-19 Surveillance Team                                                                                                                                                                                                                                                                                                                                                                       |
| EPI_ISL_704688, EPI_ISL_704696, EPI_ISL_704722, EPI_ISL_704732, EPI_ISL_704733, EPI_ISL_704743, EPI_ISL_704745, EPI_ISL_704756, EPI_ISL_704767, EPI_ISL_704769, EPI_ISL_704774, EPI_ISL_704778, EPI_ISL_704781, EPI_ISL_704782, EPI_ISL_704785, EPI_ISL_704792, EPI_ISL_704793, EPI_ISL_704800, EPI_ISL_704810, EPI_ISL_704811 | Lighthouse Lab in Cambridge                                                                                                                                                                                         | Wellcome Sanger Institute for the COVID-19 Genomics UK (COG-UK) Consortium | Rob Howes, The Lighthouse Lab in Cambridge and Alex Alderton, Roberto Amato, Sonia Goncalves, Ewan Harrison, David K. Jackson, Ian Johnston, Dominic Kwiatkowski, Cordella Langford, John Sillitoe on behalf of the Wellcome Sanger Institute COVID-19 Surveillance Team                                                                                                                                                                                                                                                                                                                                                                                                             |
| EPI_ISL_704812                                                                                                                                                                                                                                                                                                                 | Oxford Victoria, NDM, University of Oxford, Oxford University Hospitals, Basingsstone and North Hampshire Hospital                                                                                                  | COVID-19 Genomics UK (COG-UK) Consortium                                   | Tanya Golubchik, David Bonasall, George MacIntyre, Amy Tebbs, Mariateresa de Cesare, Caitin Moore, Alex Mobbs, Anita Justica, Robert Shaw, Monique Andersson, Timothy Peio, Emma Wise, Nathan Moore, Jessica Lynch, Nick Cortes, Malibu Mori, Stephen Kidd, David Buck, John Todd, Christopher Fraser                                                                                                                                                                                                                                                                                                                                                                                |
| EPI_ISL_704821, EPI_ISL_704824, EPI_ISL_704840, EPI_ISL_704841, EPI_ISL_704857, EPI_ISL_704859, EPI_ISL_704865, EPI_ISL_704870, EPI_ISL_704880, EPI_ISL_704881, EPI_ISL_704889, EPI_ISL_704894                                                                                                                                 | Lighthouse Lab in Cambridge                                                                                                                                                                                         | Wellcome Sanger Institute for the COVID-19 Genomics UK (COG-UK) Consortium | Rob Howes, The Lighthouse Lab in Cambridge and Alex Alderton, Roberto Amato, Sonia Goncalves, Ewan Harrison, David K. Jackson, Ian Johnston, Dominic Kwiatkowski, Cordella Langford, John Sillitoe on behalf of the Wellcome Sanger Institute COVID-19 Surveillance Team                                                                                                                                                                                                                                                                                                                                                                                                             |
| EPI_ISL_704895, EPI_ISL_704897, EPI_ISL_704900, EPI_ISL_704903, EPI_ISL_704905                                                                                                                                                                                                                                                 | Liverpool Clinical Laboratories                                                                                                                                                                                     | COVID-19 Genomics UK (COG-UK) Consortium                                   | Sam Hadeney, Ania Luczak, Steve Paterson, Julian Harko, Alistair Darcy, M Almsaad, A Alrezaifi, Muhammad Alruwaili, Stuart D Armstrong, Jones Benjamin, Eleanor G Bentley, Anu Chawla, Jordan J Clark, Angela Cowell, Richard Eccles, Isabel Garcia-Dorival, Matthew Gemmill, Alessandro Gerada, PKF Gilmore, Richard Gregory, Ximeng Han, Catherine Hartley, Margaret Hughes, Miran Jurinca-Gomara, James Johnson, L Liu, Jennifer Mansson, Charlotte Nelson, Elaine O'Toole, Cassie Orladiu, Rebekah Penrice-Randall, Lucille Rankow, NP Randle, Trevor Ian Robinson, Parul Sharma, Ghada T Shawil, James P Stewart, Neil Swainston, Esterina Varnos, Joanne Walis, Mark Whithread |
| EPI_ISL_704912, EPI_ISL_704915                                                                                                                                                                                                                                                                                                 | Lighthouse Lab in Cambridge                                                                                                                                                                                         | Wellcome Sanger Institute for the COVID-19 Genomics UK (COG-UK) Consortium | Rob Howes, The Lighthouse Lab in Cambridge and Alex Alderton, Roberto Amato, Sonia Goncalves, Ewan Harrison, David K. Jackson, Ian Johnston, Dominic Kwiatkowski, Cordella Langford, John Sillitoe on behalf of the Wellcome Sanger Institute COVID-19 Surveillance Team                                                                                                                                                                                                                                                                                                                                                                                                             |
| EPI_ISL_704918                                                                                                                                                                                                                                                                                                                 | Wales Specialist Victory Centre Sequencing lab: Pathogen Genomics Unit                                                                                                                                              | COVID-19 Genomics UK (COG-UK) Consortium                                   | Catherine Moore, Johnathan Evans, Laura Gifford, Malorie Perry, Simon Cottrell, Angela Marchbank, Alec Birchley, Alexander Adams, Amy Gaslin, Brie Gatica-Wilcox, Jason Coombes, Joel Southgate, Lauren Gilbert, Lee Graham, Nicola Pascolunghi, Sara Kuzunze-Summerhayes, Sarah Taylor, Sophie Jones, Sara Ray, Matthew Bull, Joanne Watkins, Sally Cordean, Tom Connor                                                                                                                                                                                                                                                                                                             |
| EPI_ISL_704921, EPI_ISL_704923, EPI_ISL_704926                                                                                                                                                                                                                                                                                 | Quadram Institute Bioscience                                                                                                                                                                                        | COVID-19 Genomics UK (COG-UK) Consortium                                   | Dave J Baker, Gemma L Kay, Abi Aydin, Thanh Le-Viet, Steven Rudder, Ana P. Tedim, Anastasia Kolyva, Maria Diaz, Leonardo de Oliveira Martins, Nabil-Fareed Alkhan, Lizzie Meadows, Rachael Stanley, Ngzi Elnogoo, Muhammed Yasir, Nicholas M. Thomson, Alexander J Trotter, Rachel Gilroy,                                                                                                                                                                                                                                                                                                                                                                                           |

|                |                                                                                                                                                                                  |                                                                            |                                                                                                                                                                                                                                                                                                                                                                                                                                                                                                                                                                                                                                                                                           |
|----------------|----------------------------------------------------------------------------------------------------------------------------------------------------------------------------------|----------------------------------------------------------------------------|-------------------------------------------------------------------------------------------------------------------------------------------------------------------------------------------------------------------------------------------------------------------------------------------------------------------------------------------------------------------------------------------------------------------------------------------------------------------------------------------------------------------------------------------------------------------------------------------------------------------------------------------------------------------------------------------|
| EPI_ISL_704927 | Lighthouse Lab in Cambridge                                                                                                                                                      | Wellcome Sanger Institute for the COVID-19 Genomics UK (COG-UK) Consortium | Rob Howes, The Lighthouse Lab in Cambridge and Alex Alderton, Roberto Amato, Sonia Goncalves, Ewan Harrison, David K. Jackson, Ian Johnston, Dominic Kwiatkowski, Cordelia Langford, John Sillcoe on behalf of the Wellcome Sanger Institute COVID-19 Surveillance Team                                                                                                                                                                                                                                                                                                                                                                                                                   |
| EPI_ISL_704929 | Quadram Institute Bioscience                                                                                                                                                     | COVID-19 Genomics UK (COG-UK) Consortium                                   | Dave J. Baker, Gemma L. Kay, Aly Avdin, Thanh Le-Viet, Steven Rudder, Ana P. Tadin, Anastasiya Kolyva, Maria Diaz, Leonardo de Oliveira Martins, Nihal-Fareed Alihan, Lizzie Leungos, Pachai Stanley, Nguzi Elnurogo, Muhammad Noor, Nicholas M. Thomson, Alexander J. Trotter, Rachel Gilroy, Samuel Bloomfield, Claire Stuart, Andrew Bell, Reemesh Prakash, Samir Dervisevic, Alison E. Mather, John Wain, Mark Webber, Andrew J. Page, Justin O'Grady                                                                                                                                                                                                                                 |
| EPI_ISL_704934 | Liverpool Clinical Laboratories                                                                                                                                                  | COVID-19 Genomics UK (COG-UK) Consortium                                   | Sam Haddenby, Anita Luczad, Steve Paterson, Julian Hiscox, Alistair Darby, M. Almsaud, A. Alvezzahi, Muhammad Alruwaili, Stuart D Armstrong, Jones Benjamin, Eleanor G Bentley, Anu Chawla, Jordan J Clark, Angela Cowell, Richard Eccles, Isabel Garcia-Donval, Matthew Gemmill, Alessandro Gerada, PFR Gilmore, Richard Gregory, Ximeng Han, Catherine Hartley, Margaret Hughes, Miran Juriza-Gomara, James Johnson, L. Liu, Jennifer Manson, Charlotte Nelson, Elaine O'Toole, Casise Olatelu, Rebekah Parrice-Frandel, Lucille Rahnov, N.P Randle, Trevor Ian Robinson, Parul Sharma, Ghada T Shawli, James P Stewart, Neil Swainson, Ecaterina Varnos, Joanne Waiats, Mark Whitehead |
| EPI_ISL_704935 | Lighthouse Lab in Cambridge                                                                                                                                                      | Wellcome Sanger Institute for the COVID-19 Genomics UK (COG-UK) Consortium | Rob Howes, The Lighthouse Lab in Cambridge and Alex Alderton, Roberto Amato, Sonia Goncalves, Ewan Harrison, David K. Jackson, Ian Johnston, Dominic Kwiatkowski, Cordelia Langford, John Sillcoe on behalf of the Wellcome Sanger Institute COVID-19 Surveillance Team                                                                                                                                                                                                                                                                                                                                                                                                                   |
| EPI_ISL_704937 | Liverpool Clinical Laboratories                                                                                                                                                  | COVID-19 Genomics UK (COG-UK) Consortium                                   | Sam Haddenby, Anita Luczad, Steve Paterson, Julian Hiscox, Alistair Darby, M. Almsaud, A. Alvezzahi, Muhammad Alruwaili, Stuart D Armstrong, Jones Benjamin, Eleanor G Bentley, Anu Chawla, Jordan J Clark, Angela Cowell, Richard Eccles, Isabel Garcia-Donval, Matthew Gemmill, Alessandro Gerada, PFR Gilmore, Richard Gregory, Ximeng Han, Catherine Hartley, Margaret Hughes, Miran Juriza-Gomara, James Johnson, L. Liu, Jennifer Manson, Charlotte Nelson, Elaine O'Toole, Casise Olatelu, Rebekah Parrice-Frandel, Lucille Rahnov, N.P Randle, Trevor Ian Robinson, Parul Sharma, Ghada T Shawli, James P Stewart, Neil Swainson, Ecaterina Varnos, Joanne Waiats, Mark Whitehead |
| EPI_ISL_704938 | Lighthouse Lab in Cambridge                                                                                                                                                      | Wellcome Sanger Institute for the COVID-19 Genomics UK (COG-UK) Consortium | Rob Howes, The Lighthouse Lab in Cambridge and Alex Alderton, Roberto Amato, Sonia Goncalves, Ewan Harrison, David K. Jackson, Ian Johnston, Dominic Kwiatkowski, Cordelia Langford, John Sillcoe on behalf of the Wellcome Sanger Institute COVID-19 Surveillance Team                                                                                                                                                                                                                                                                                                                                                                                                                   |
| EPI_ISL_704942 | Liverpool Clinical Laboratories                                                                                                                                                  | COVID-19 Genomics UK (COG-UK) Consortium                                   | Sam Haddenby, Anita Luczad, Steve Paterson, Julian Hiscox, Alistair Darby, M. Almsaud, A. Alvezzahi, Muhammad Alruwaili, Stuart D Armstrong, Jones Benjamin, Eleanor G Bentley, Anu Chawla, Jordan J Clark, Angela Cowell, Richard Eccles, Isabel Garcia-Donval, Matthew Gemmill, Alessandro Gerada, PFR Gilmore, Richard Gregory, Ximeng Han, Catherine Hartley, Margaret Hughes, Miran Juriza-Gomara, James Johnson, L. Liu, Jennifer Manson, Charlotte Nelson, Elaine O'Toole, Casise Olatelu, Rebekah Parrice-Frandel, Lucille Rahnov, N.P Randle, Trevor Ian Robinson, Parul Sharma, Ghada T Shawli, James P Stewart, Neil Swainson, Ecaterina Varnos, Joanne Waiats, Mark Whitehead |
| EPI_ISL_704943 | Lighthouse Lab in Cambridge                                                                                                                                                      | Wellcome Sanger Institute for the COVID-19 Genomics UK (COG-UK) Consortium | Rob Howes, The Lighthouse Lab in Cambridge and Alex Alderton, Roberto Amato, Sonia Goncalves, Ewan Harrison, David K. Jackson, Ian Johnston, Dominic Kwiatkowski, Cordelia Langford, John Sillcoe on behalf of the Wellcome Sanger Institute COVID-19 Surveillance Team                                                                                                                                                                                                                                                                                                                                                                                                                   |
| EPI_ISL_704945 | Liverpool Clinical Laboratories                                                                                                                                                  | COVID-19 Genomics UK (COG-UK) Consortium                                   | Sam Haddenby, Anita Luczad, Steve Paterson, Julian Hiscox, Alistair Darby, M. Almsaud, A. Alvezzahi, Muhammad Alruwaili, Stuart D Armstrong, Jones Benjamin, Eleanor G Bentley, Anu Chawla, Jordan J Clark, Angela Cowell, Richard Eccles, Isabel Garcia-Donval, Matthew Gemmill, Alessandro Gerada, PFR Gilmore, Richard Gregory, Ximeng Han, Catherine Hartley, Margaret Hughes, Miran Juriza-Gomara, James Johnson, L. Liu, Jennifer Manson, Charlotte Nelson, Elaine O'Toole, Casise Olatelu, Rebekah Parrice-Frandel, Lucille Rahnov, N.P Randle, Trevor Ian Robinson, Parul Sharma, Ghada T Shawli, James P Stewart, Neil Swainson, Ecaterina Varnos, Joanne Waiats, Mark Whitehead |
| EPI_ISL_704948 | Lighthouse Lab in Cambridge                                                                                                                                                      | Wellcome Sanger Institute for the COVID-19 Genomics UK (COG-UK) Consortium | Rob Howes, The Lighthouse Lab in Cambridge and Alex Alderton, Roberto Amato, Sonia Goncalves, Ewan Harrison, David K. Jackson, Ian Johnston, Dominic Kwiatkowski, Cordelia Langford, John Sillcoe on behalf of the Wellcome Sanger Institute COVID-19 Surveillance Team                                                                                                                                                                                                                                                                                                                                                                                                                   |
| EPI_ISL_704952 | West of Scotland Specialist Virology Centre, NHSGGC / MRC-University of Glasgow Centre for Virus Research                                                                        | COVID-19 Genomics UK (COG-UK) Consortium                                   | Ana da Silva Filipe, Natasha Johnson, Kathy Smollett, Daniel Meir, Stephen Carmichael, Alice Brooks, Lily Tong, Jenna Nichols, Kyriaki Nomioku, Sarah McDonald, Rachel Blacow, Guy Mollath, Kathy L, James Shepherd, Antonia Ho, Emma Thomson                                                                                                                                                                                                                                                                                                                                                                                                                                             |
| EPI_ISL_704954 | Lighthouse Lab in Cambridge                                                                                                                                                      | Wellcome Sanger Institute for the COVID-19 Genomics UK (COG-UK) Consortium | Rob Howes, The Lighthouse Lab in Cambridge and Alex Alderton, Roberto Amato, Sonia Goncalves, Ewan Harrison, David K. Jackson, Ian Johnston, Dominic Kwiatkowski, Cordelia Langford, John Sillcoe on behalf of the Wellcome Sanger Institute COVID-19 Surveillance Team                                                                                                                                                                                                                                                                                                                                                                                                                   |
| EPI_ISL_704960 | Virology Department, Sheffield Teaching Hospitals NHS Foundation Trust/Department of Infection, Immunity and Cardiovascular Disease, The Medical School, University of Sheffield | COVID-19 Genomics UK (COG-UK) Consortium                                   | Thushan de Silva, Matthew Parker, Nikki Smith, Adri Anygal, Rebecca Brown, Luke Green, Rachel Tucker, Paul Parsons, Danielle Groves, Katie Johnson, Laura Carrilero, Alex Keesley, Dave Partridge, Matthew Wyles, Benjamin Wyles, Benjamin Vanz, Mohammed Raza, Carad Evans                                                                                                                                                                                                                                                                                                                                                                                                               |
| EPI_ISL_704961 | Lighthouse Lab in Cambridge                                                                                                                                                      | Wellcome Sanger Institute for the COVID-19 Genomics UK (COG-UK) Consortium | Rob Howes, The Lighthouse Lab in Cambridge and Alex Alderton, Roberto Amato, Sonia Goncalves, Ewan Harrison, David K. Jackson, Ian Johnston, Dominic Kwiatkowski, Cordelia Langford, John Sillcoe on behalf of the Wellcome Sanger Institute COVID-19 Surveillance Team                                                                                                                                                                                                                                                                                                                                                                                                                   |
| EPI_ISL_704965 | University College London, Great Ormond Street Hospital for Children NHS Foundation Trust, Imperial College Healthcare NHS Trust                                                 | COVID-19 Genomics UK (COG-UK) Consortium                                   | Sergi Castellano, Rachel Williams, Mark Kristiansen, Paola Resende Silva, Surando Roy, Tony Brooks, Helena Tuili, Paola Niola, Patricia Dyal, Charlotte Williams, Leyza Forrest, Yasmin Panchbhaya, Jacqueline Findlay, Samuel Weeks, Julianne Brown, Kathryn Harris, Paul Randell, James Price, Alison Holmes, Judith Breuer                                                                                                                                                                                                                                                                                                                                                             |
| EPI_ISL_704976 | Northumbria University / South Tees Hospitals NHS Foundation Trust / North Cumbria Integrated Care NHS Foundation Trust / Newcastle Hospitals NHS Foundation Trust               | COVID-19 Genomics UK (COG-UK) Consortium                                   | Daren L Smith, Andrew Nelson, Matthew Bashton, Greg R Young, Joshua Loh, John Allen, Mohammad A Tariq, Giles S Holt, Gary Black, Wen C Yew, Lynn Dover, Paul Baker, Steve Liggett, Sarah Essex, Jane Greenaway, Dora Padgett, Clive Graham, Garryon Scott, Edward Barton, Emma Swindells, Brendan Payne, Jennifer Collins, Yvett Taha, Gary Eltringham                                                                                                                                                                                                                                                                                                                                    |
| EPI_ISL_704989 | Liverpool Clinical Laboratories                                                                                                                                                  | COVID-19 Genomics UK (COG-UK) Consortium                                   | Sam Haddenby, Anita Luczad, Steve Paterson, Julian Hiscox, Alistair Darby, M. Almsaud, A. Alvezzahi, Muhammad Alruwaili, Stuart D Armstrong, Jones Benjamin, Eleanor G Bentley, Anu Chawla, Jordan J Clark, Angela Cowell, Richard Eccles, Isabel Garcia-Donval, Matthew Gemmill, Alessandro Gerada, PFR Gilmore, Richard Gregory, Ximeng Han, Catherine Hartley, Margaret Hughes, Miran Juriza-Gomara, James Johnson, L. Liu, Jennifer Manson, Charlotte Nelson, Elaine O'Toole, Casise Olatelu, Rebekah Parrice-Frandel, Lucille Rahnov, N.P Randle, Trevor Ian Robinson, Parul Sharma, Ghada T Shawli, James P Stewart, Neil Swainson, Ecaterina Varnos, Joanne Waiats, Mark Whitehead |
| EPI_ISL_704992 | Lighthouse Lab in Cambridge                                                                                                                                                      | Wellcome Sanger Institute for the COVID-19 Genomics UK (COG-UK) Consortium | Rob Howes, The Lighthouse Lab in Cambridge and Alex Alderton, Roberto Amato, Sonia Goncalves, Ewan Harrison, David K. Jackson, Ian Johnston, Dominic Kwiatkowski, Cordelia Langford, John Sillcoe on behalf of the Wellcome Sanger Institute COVID-19 Surveillance Team                                                                                                                                                                                                                                                                                                                                                                                                                   |
| EPI_ISL_704997 | University College London, Great Ormond Street Hospital for Children NHS Foundation Trust, Imperial College Healthcare NHS Trust                                                 | COVID-19 Genomics UK (COG-UK) Consortium                                   | Sergi Castellano, Rachel Williams, Mark Kristiansen, Paola Resende Silva, Surando Roy, Tony Brooks, Helena Tuili, Paola Niola, Patricia Dyal, Charlotte Williams, Leyza Forrest, Yasmin Panchbhaya, Jacqueline Findlay, Samuel Weeks, Julianne Brown, Kathryn Harris, Paul Randell, James Price, Alison Holmes, Judith Breuer                                                                                                                                                                                                                                                                                                                                                             |
| EPI_ISL_705002 | West of Scotland Specialist Virology Centre, NHSGGC / MRC-University of Glasgow Centre for Virus Research                                                                        | COVID-19 Genomics UK (COG-UK) Consortium                                   | Ana da Silva Filipe, Natasha Johnson, Kathy Smollett, Daniel Meir, Stephen Carmichael, Alice Brooks, Lily Tong, Jenna Nichols, Kyriaki Nomioku, Sarah McDonald, Richard Orton, Joseph Hughes, Steenu Vairappilly, David L Robinson, Alasdair Maclean, Rory Gurnson, Sharif Shaaban, Matthew Holden, Rachel Blacow, Guy Mollath, Kathy L, James Shepherd, Antonia Ho, Emma Thomson                                                                                                                                                                                                                                                                                                         |
| EPI_ISL_705005 | Liverpool Clinical Laboratories                                                                                                                                                  | COVID-19 Genomics UK (COG-UK) Consortium                                   | Sam Haddenby, Anita Luczad, Steve Paterson, Julian Hiscox, Alistair Darby, M. Almsaud, A. Alvezzahi, Muhammad Alruwaili, Stuart D Armstrong, Jones Benjamin, Eleanor G Bentley, Anu Chawla, Jordan J Clark, Angela Cowell, Richard Eccles, Isabel Garcia-Donval, Matthew Gemmill, Alessandro Gerada, PFR Gilmore, Richard Gregory, Ximeng Han, Catherine Hartley, Margaret Hughes, Miran Juriza-Gomara, James Johnson, L. Liu, Jennifer Manson, Charlotte Nelson, Elaine O'Toole, Casise Olatelu, Rebekah Parrice-Frandel, Lucille Rahnov, N.P Randle, Trevor Ian Robinson, Parul Sharma, Ghada T Shawli, James P Stewart, Neil Swainson, Ecaterina Varnos, Joanne Waiats, Mark Whitehead |
| EPI_ISL_705009 | Lighthouse Lab in Cambridge                                                                                                                                                      | Wellcome Sanger Institute for the COVID-19 Genomics UK (COG-UK) Consortium | Rob Howes, The Lighthouse Lab in Cambridge and Alex Alderton, Roberto Amato, Sonia Goncalves, Ewan Harrison, David K. Jackson, Ian Johnston, Dominic Kwiatkowski, Cordelia Langford, John Sillcoe on behalf of the Wellcome Sanger Institute COVID-19 Surveillance Team                                                                                                                                                                                                                                                                                                                                                                                                                   |
| EPI_ISL_705010 | Northumbria University / South Tees Hospitals NHS Foundation Trust / North Cumbria Integrated Care NHS                                                                           | COVID-19 Genomics UK (COG-UK) Consortium                                   | Daren L Smith, Andrew Nelson, Matthew Bashton, Greg R Young, Joshua Loh, John Allen, Mohammad A Tariq, Giles S Holt, Gary Black, Wen C Yew, Lynn Dover, Paul Baker, Steve Liggett, Sarah Essex, Jane Greenaway, Dora Padgett, Clive Graham, Garryon Scott, Edward Barton, Emma Swindells, Brendan                                                                                                                                                                                                                                                                                                                                                                                         |

|                                |                                                                                                                                                                                  |                                                                            |                                                                                                                                                                                                                                                                                                                                                                                                                                                                                                                                                                                                                                                                                     |
|--------------------------------|----------------------------------------------------------------------------------------------------------------------------------------------------------------------------------|----------------------------------------------------------------------------|-------------------------------------------------------------------------------------------------------------------------------------------------------------------------------------------------------------------------------------------------------------------------------------------------------------------------------------------------------------------------------------------------------------------------------------------------------------------------------------------------------------------------------------------------------------------------------------------------------------------------------------------------------------------------------------|
| EPI_ISL_705011                 | Lighthouse Lab in Cambridge                                                                                                                                                      | Wellcome Sanger Institute for the COVID-19 Genomics UK (COG-UK) Consortium | Rob Howes, The Lighthouse Lab in Cambridge and Alex Alderton, Roberto Amato, Sonia Goncalves, Ewan Harrison, David K. Jackson, Ian Johnston, Dominic Kwiatkowski, Cordelia Langford, John Sillcoe on behalf of the Wellcome Sanger Institute COVID-19 Surveillance Team                                                                                                                                                                                                                                                                                                                                                                                                             |
| EPI_ISL_705013                 | Liverpool Clinical Laboratories                                                                                                                                                  | COVID-19 Genomics UK (COG-UK) Consortium                                   | Sam Hadenby, Ania Lucea, Steve Paterson, Julian Hiscox, Alistair Darty, M Aimsaud, A Alrezahli, Muhammad Alruwaili, Stuart D Armstrong, Jones Benjamin, Eleanor G Bentley, Anu Chawla, Jordan J Clark, Angela Cowell, Richard Eccles, Isabel Garcia-Domval, Matthew Gemmill, Alessandro Gerada, PKF Gilmore, Richard Gregory, Ximeng Han, Catherine Hartley, Margaret Hughes, Miran Ijurza-Gomara, James Johnson, L Liu, Jennifer Manson, Charlotte Nelson, Elaine O'Toole, Cassie Orlaolu, Rebekah Penrice-Handel, Lucille Rahnbow, N P Randle, Trevor Ian Robinson, Parul Sharma, Ghada T Shawil, James P Stewart, Neil Swainston, Ecaterina Varnos, Joanne Waihs, Mark Whitehead |
| EPI_ISL_705014, EPI_ISL_705023 | Lighthouse Lab in Cambridge                                                                                                                                                      | Wellcome Sanger Institute for the COVID-19 Genomics UK (COG-UK) Consortium | Rob Howes, The Lighthouse Lab in Cambridge and Alex Alderton, Roberto Amato, Sonia Goncalves, Ewan Harrison, David K. Jackson, Ian Johnston, Dominic Kwiatkowski, Cordelia Langford, John Sillcoe on behalf of the Wellcome Sanger Institute COVID-19 Surveillance Team                                                                                                                                                                                                                                                                                                                                                                                                             |
| EPI_ISL_705024                 | Liverpool Clinical Laboratories                                                                                                                                                  | COVID-19 Genomics UK (COG-UK) Consortium                                   | Sam Hadenby, Ania Lucea, Steve Paterson, Julian Hiscox, Alistair Darty, M Aimsaud, A Alrezahli, Muhammad Alruwaili, Stuart D Armstrong, Jones Benjamin, Eleanor G Bentley, Anu Chawla, Jordan J Clark, Angela Cowell, Richard Eccles, Isabel Garcia-Domval, Matthew Gemmill, Alessandro Gerada, PKF Gilmore, Richard Gregory, Ximeng Han, Catherine Hartley, Margaret Hughes, Miran Ijurza-Gomara, James Johnson, L Liu, Jennifer Manson, Charlotte Nelson, Elaine O'Toole, Cassie Orlaolu, Rebekah Penrice-Handel, Lucille Rahnbow, N P Randle, Trevor Ian Robinson, Parul Sharma, Ghada T Shawil, James P Stewart, Neil Swainston, Ecaterina Varnos, Joanne Waihs, Mark Whitehead |
| EPI_ISL_705025                 | Lighthouse Lab in Cambridge                                                                                                                                                      | Wellcome Sanger Institute for the COVID-19 Genomics UK (COG-UK) Consortium | Rob Howes, The Lighthouse Lab in Cambridge and Alex Alderton, Roberto Amato, Sonia Goncalves, Ewan Harrison, David K. Jackson, Ian Johnston, Dominic Kwiatkowski, Cordelia Langford, John Sillcoe on behalf of the Wellcome Sanger Institute COVID-19 Surveillance Team                                                                                                                                                                                                                                                                                                                                                                                                             |
| EPI_ISL_705030, EPI_ISL_705032 | Liverpool Clinical Laboratories                                                                                                                                                  | COVID-19 Genomics UK (COG-UK) Consortium                                   | Sam Hadenby, Ania Lucea, Steve Paterson, Julian Hiscox, Alistair Darty, M Aimsaud, A Alrezahli, Muhammad Alruwaili, Stuart D Armstrong, Jones Benjamin, Eleanor G Bentley, Anu Chawla, Jordan J Clark, Angela Cowell, Richard Eccles, Isabel Garcia-Domval, Matthew Gemmill, Alessandro Gerada, PKF Gilmore, Richard Gregory, Ximeng Han, Catherine Hartley, Margaret Hughes, Miran Ijurza-Gomara, James Johnson, L Liu, Jennifer Manson, Charlotte Nelson, Elaine O'Toole, Cassie Orlaolu, Rebekah Penrice-Handel, Lucille Rahnbow, N P Randle, Trevor Ian Robinson, Parul Sharma, Ghada T Shawil, James P Stewart, Neil Swainston, Ecaterina Varnos, Joanne Waihs, Mark Whitehead |
| EPI_ISL_705034, EPI_ISL_705037 | Lighthouse Lab in Cambridge                                                                                                                                                      | Wellcome Sanger Institute for the COVID-19 Genomics UK (COG-UK) Consortium | Rob Howes, The Lighthouse Lab in Cambridge and Alex Alderton, Roberto Amato, Sonia Goncalves, Ewan Harrison, David K. Jackson, Ian Johnston, Dominic Kwiatkowski, Cordelia Langford, John Sillcoe on behalf of the Wellcome Sanger Institute COVID-19 Surveillance Team                                                                                                                                                                                                                                                                                                                                                                                                             |
| EPI_ISL_705038                 | Liverpool Clinical Laboratories                                                                                                                                                  | COVID-19 Genomics UK (COG-UK) Consortium                                   | Sam Hadenby, Ania Lucea, Steve Paterson, Julian Hiscox, Alistair Darty, M Aimsaud, A Alrezahli, Muhammad Alruwaili, Stuart D Armstrong, Jones Benjamin, Eleanor G Bentley, Anu Chawla, Jordan J Clark, Angela Cowell, Richard Eccles, Isabel Garcia-Domval, Matthew Gemmill, Alessandro Gerada, PKF Gilmore, Richard Gregory, Ximeng Han, Catherine Hartley, Margaret Hughes, Miran Ijurza-Gomara, James Johnson, L Liu, Jennifer Manson, Charlotte Nelson, Elaine O'Toole, Cassie Orlaolu, Rebekah Penrice-Handel, Lucille Rahnbow, N P Randle, Trevor Ian Robinson, Parul Sharma, Ghada T Shawil, James P Stewart, Neil Swainston, Ecaterina Varnos, Joanne Waihs, Mark Whitehead |
| EPI_ISL_705042                 | Lighthouse Lab in Cambridge                                                                                                                                                      | Wellcome Sanger Institute for the COVID-19 Genomics UK (COG-UK) Consortium | Rob Howes, The Lighthouse Lab in Cambridge and Alex Alderton, Roberto Amato, Sonia Goncalves, Ewan Harrison, David K. Jackson, Ian Johnston, Dominic Kwiatkowski, Cordelia Langford, John Sillcoe on behalf of the Wellcome Sanger Institute COVID-19 Surveillance Team                                                                                                                                                                                                                                                                                                                                                                                                             |
| EPI_ISL_705043                 | Liverpool Clinical Laboratories                                                                                                                                                  | COVID-19 Genomics UK (COG-UK) Consortium                                   | Sam Hadenby, Ania Lucea, Steve Paterson, Julian Hiscox, Alistair Darty, M Aimsaud, A Alrezahli, Muhammad Alruwaili, Stuart D Armstrong, Jones Benjamin, Eleanor G Bentley, Anu Chawla, Jordan J Clark, Angela Cowell, Richard Eccles, Isabel Garcia-Domval, Matthew Gemmill, Alessandro Gerada, PKF Gilmore, Richard Gregory, Ximeng Han, Catherine Hartley, Margaret Hughes, Miran Ijurza-Gomara, James Johnson, L Liu, Jennifer Manson, Charlotte Nelson, Elaine O'Toole, Cassie Orlaolu, Rebekah Penrice-Handel, Lucille Rahnbow, N P Randle, Trevor Ian Robinson, Parul Sharma, Ghada T Shawil, James P Stewart, Neil Swainston, Ecaterina Varnos, Joanne Waihs, Mark Whitehead |
| EPI_ISL_705045                 | Lighthouse Lab in Cambridge                                                                                                                                                      | Wellcome Sanger Institute for the COVID-19 Genomics UK (COG-UK) Consortium | Rob Howes, The Lighthouse Lab in Cambridge and Alex Alderton, Roberto Amato, Sonia Goncalves, Ewan Harrison, David K. Jackson, Ian Johnston, Dominic Kwiatkowski, Cordelia Langford, John Sillcoe on behalf of the Wellcome Sanger Institute COVID-19 Surveillance Team                                                                                                                                                                                                                                                                                                                                                                                                             |
| EPI_ISL_705048                 | Liverpool Clinical Laboratories                                                                                                                                                  | COVID-19 Genomics UK (COG-UK) Consortium                                   | Sam Hadenby, Ania Lucea, Steve Paterson, Julian Hiscox, Alistair Darty, M Aimsaud, A Alrezahli, Muhammad Alruwaili, Stuart D Armstrong, Jones Benjamin, Eleanor G Bentley, Anu Chawla, Jordan J Clark, Angela Cowell, Richard Eccles, Isabel Garcia-Domval, Matthew Gemmill, Alessandro Gerada, PKF Gilmore, Richard Gregory, Ximeng Han, Catherine Hartley, Margaret Hughes, Miran Ijurza-Gomara, James Johnson, L Liu, Jennifer Manson, Charlotte Nelson, Elaine O'Toole, Cassie Orlaolu, Rebekah Penrice-Handel, Lucille Rahnbow, N P Randle, Trevor Ian Robinson, Parul Sharma, Ghada T Shawil, James P Stewart, Neil Swainston, Ecaterina Varnos, Joanne Waihs, Mark Whitehead |
| EPI_ISL_705050, EPI_ISL_705052 | Lighthouse Lab in Cambridge                                                                                                                                                      | Wellcome Sanger Institute for the COVID-19 Genomics UK (COG-UK) Consortium | Rob Howes, The Lighthouse Lab in Cambridge and Alex Alderton, Roberto Amato, Sonia Goncalves, Ewan Harrison, David K. Jackson, Ian Johnston, Dominic Kwiatkowski, Cordelia Langford, John Sillcoe on behalf of the Wellcome Sanger Institute COVID-19 Surveillance Team                                                                                                                                                                                                                                                                                                                                                                                                             |
| EPI_ISL_705054, EPI_ISL_705056 | Liverpool Clinical Laboratories                                                                                                                                                  | COVID-19 Genomics UK (COG-UK) Consortium                                   | Sam Hadenby, Ania Lucea, Steve Paterson, Julian Hiscox, Alistair Darty, M Aimsaud, A Alrezahli, Muhammad Alruwaili, Stuart D Armstrong, Jones Benjamin, Eleanor G Bentley, Anu Chawla, Jordan J Clark, Angela Cowell, Richard Eccles, Isabel Garcia-Domval, Matthew Gemmill, Alessandro Gerada, PKF Gilmore, Richard Gregory, Ximeng Han, Catherine Hartley, Margaret Hughes, Miran Ijurza-Gomara, James Johnson, L Liu, Jennifer Manson, Charlotte Nelson, Elaine O'Toole, Cassie Orlaolu, Rebekah Penrice-Handel, Lucille Rahnbow, N P Randle, Trevor Ian Robinson, Parul Sharma, Ghada T Shawil, James P Stewart, Neil Swainston, Ecaterina Varnos, Joanne Waihs, Mark Whitehead |
| EPI_ISL_705058                 | Lighthouse Lab in Cambridge                                                                                                                                                      | Wellcome Sanger Institute for the COVID-19 Genomics UK (COG-UK) Consortium | Rob Howes, The Lighthouse Lab in Cambridge and Alex Alderton, Roberto Amato, Sonia Goncalves, Ewan Harrison, David K. Jackson, Ian Johnston, Dominic Kwiatkowski, Cordelia Langford, John Sillcoe on behalf of the Wellcome Sanger Institute COVID-19 Surveillance Team                                                                                                                                                                                                                                                                                                                                                                                                             |
| EPI_ISL_705070                 | Wales Specialist Virology Centre Sequencing lab: Pathogen Genomics Unit                                                                                                          | COVID-19 Genomics UK (COG-UK) Consortium                                   | Catherine Moore, Johnathan Evans, Laura Gifford, Malorie Parry, Simon Cottrell, Angela Marchbank, Alec Birchley, Alexander Adams, Amy Gaslin, Bree Galica-Wilcox, Jason Coombes, Joel Scudgale, Lauren Gilbert, Lee Graham, Nicole P Kochharli, Sara Kurzenes-Summerhays, Sarah Taylor, Sophie Jones, Sara Hay, Matthew Burt, Joanne Watkins, Sally Conden, Tom Connor                                                                                                                                                                                                                                                                                                              |
| EPI_ISL_705080                 | Lighthouse Lab in Cambridge                                                                                                                                                      | Wellcome Sanger Institute for the COVID-19 Genomics UK (COG-UK) Consortium | Rob Howes, The Lighthouse Lab in Cambridge and Alex Alderton, Roberto Amato, Sonia Goncalves, Ewan Harrison, David K. Jackson, Ian Johnston, Dominic Kwiatkowski, Cordelia Langford, John Sillcoe on behalf of the Wellcome Sanger Institute COVID-19 Surveillance Team                                                                                                                                                                                                                                                                                                                                                                                                             |
| EPI_ISL_705083                 | Liverpool Clinical Laboratories                                                                                                                                                  | COVID-19 Genomics UK (COG-UK) Consortium                                   | Sam Hadenby, Ania Lucea, Steve Paterson, Julian Hiscox, Alistair Darty, M Aimsaud, A Alrezahli, Muhammad Alruwaili, Stuart D Armstrong, Jones Benjamin, Eleanor G Bentley, Anu Chawla, Jordan J Clark, Angela Cowell, Richard Eccles, Isabel Garcia-Domval, Matthew Gemmill, Alessandro Gerada, PKF Gilmore, Richard Gregory, Ximeng Han, Catherine Hartley, Margaret Hughes, Miran Ijurza-Gomara, James Johnson, L Liu, Jennifer Manson, Charlotte Nelson, Elaine O'Toole, Cassie Orlaolu, Rebekah Penrice-Handel, Lucille Rahnbow, N P Randle, Trevor Ian Robinson, Parul Sharma, Ghada T Shawil, James P Stewart, Neil Swainston, Ecaterina Varnos, Joanne Waihs, Mark Whitehead |
| EPI_ISL_705084                 | Lighthouse Lab in Cambridge                                                                                                                                                      | Wellcome Sanger Institute for the COVID-19 Genomics UK (COG-UK) Consortium | Rob Howes, The Lighthouse Lab in Cambridge and Alex Alderton, Roberto Amato, Sonia Goncalves, Ewan Harrison, David K. Jackson, Ian Johnston, Dominic Kwiatkowski, Cordelia Langford, John Sillcoe on behalf of the Wellcome Sanger Institute COVID-19 Surveillance Team                                                                                                                                                                                                                                                                                                                                                                                                             |
| EPI_ISL_705086                 | Liverpool Clinical Laboratories                                                                                                                                                  | COVID-19 Genomics UK (COG-UK) Consortium                                   | Sam Hadenby, Ania Lucea, Steve Paterson, Julian Hiscox, Alistair Darty, M Aimsaud, A Alrezahli, Muhammad Alruwaili, Stuart D Armstrong, Jones Benjamin, Eleanor G Bentley, Anu Chawla, Jordan J Clark, Angela Cowell, Richard Eccles, Isabel Garcia-Domval, Matthew Gemmill, Alessandro Gerada, PKF Gilmore, Richard Gregory, Ximeng Han, Catherine Hartley, Margaret Hughes, Miran Ijurza-Gomara, James Johnson, L Liu, Jennifer Manson, Charlotte Nelson, Elaine O'Toole, Cassie Orlaolu, Rebekah Penrice-Handel, Lucille Rahnbow, N P Randle, Trevor Ian Robinson, Parul Sharma, Ghada T Shawil, James P Stewart, Neil Swainston, Ecaterina Varnos, Joanne Waihs, Mark Whitehead |
| EPI_ISL_705087                 | Lighthouse Lab in Cambridge                                                                                                                                                      | Wellcome Sanger Institute for the COVID-19 Genomics UK (COG-UK) Consortium | Rob Howes, The Lighthouse Lab in Cambridge and Alex Alderton, Roberto Amato, Sonia Goncalves, Ewan Harrison, David K. Jackson, Ian Johnston, Dominic Kwiatkowski, Cordelia Langford, John Sillcoe on behalf of the Wellcome Sanger Institute COVID-19 Surveillance Team                                                                                                                                                                                                                                                                                                                                                                                                             |
| EPI_ISL_705088                 | Virology Department, Sheffield Teaching Hospitals NHS Foundation Trust/Department of Infection, Immunity and Cardiovascular Disease, The Medical School, University of Sheffield | COVID-19 Genomics UK (COG-UK) Consortium                                   | Thushan de Silva, Matthew Parker, Nikki Smith, Adri Anguix, Rebecca Brown, Luke Green, Rachel Tucker, Paul Parsons, Danielle Groves, Katie Johnson, Laura Carrtero, Alex Keesley, Dave Partridge, Matthew Wyles, Benjamin Lindsey, Mehmet Yavuz, Mohammad Raza, Carlad Evans                                                                                                                                                                                                                                                                                                                                                                                                        |



|                                |                                                                                                                                                                                  |                                                                            |                                                                                                                                                                                                                                                                                                                                                                                                                                                                                                                                                                                                                                                                                     |
|--------------------------------|----------------------------------------------------------------------------------------------------------------------------------------------------------------------------------|----------------------------------------------------------------------------|-------------------------------------------------------------------------------------------------------------------------------------------------------------------------------------------------------------------------------------------------------------------------------------------------------------------------------------------------------------------------------------------------------------------------------------------------------------------------------------------------------------------------------------------------------------------------------------------------------------------------------------------------------------------------------------|
| EP1_ISL_705089                 | Lighthouse Lab in Cambridge                                                                                                                                                      | Wellcome Sanger Institute for the COVID-19 Genomics UK (COG-UK) Consortium | Rob Howes, The Lighthouse Lab in Cambridge and Alex Alderton, Roberto Amato, Sonia Goncalves, Ewan Harrison, David K. Jackson, Ian Johnston, Dominic Kwiatkowski, Cordelia Langford, John Sillitoe on behalf of the Wellcome Sanger Institute COVID-19 Surveillance Team                                                                                                                                                                                                                                                                                                                                                                                                            |
| EP1_ISL_705091                 | Quadram Institute Bioscience                                                                                                                                                     | COVID-19 Genomics UK (COG-UK) Consortium                                   | Dave J Baker, Gemma L. Kay, Alp Aydin, Thanh Le-Viet, Steven Rudder, Ana P. Tedim, Anastasia Kolva, Maria Diaz, Leonor de Oliveira Martins, Nabil-areed Alkhatib, Lizzie Meadows, Rachael Stanley, Nygøz Eurugoo, Muhammad Yasir, Nicholas M. Thomson, Alexander J Trotter, Rachel Gilroy, Samuel Bloomfield, Claire Stuart, Andrew Bell, Heenesh Prakash, Sami Derwisic, Alison E. Maher, John Wan, Mark Webber, Andrew J. Page, Justin O'Grady                                                                                                                                                                                                                                    |
| EP1_ISL_705096                 | Virology Department, Sheffield Teaching Hospitals NHS Foundation Trust/Department of Infection, Immunity and Cardiovascular Disease, The Medical School, University of Sheffield | COVID-19 Genomics UK (COG-UK) Consortium                                   | Thushan de Silva, Matthew Parker, Nikki Smith, Adir Arnyal, Rebecca Brown, Luke Green, Rachel Tucker, Paul Parsons, Danielle Groves, Katie Johnson, Laura Carrilero, Alex Keeley, Dave Partridge, Matthew Wyles, Benjamin Lindsey, Mehmet Yavuz, Mohammad Raza, Carad Evans                                                                                                                                                                                                                                                                                                                                                                                                         |
| EP1_ISL_705097                 | Lighthouse Lab in Cambridge                                                                                                                                                      | Wellcome Sanger Institute for the COVID-19 Genomics UK (COG-UK) Consortium | Rob Howes, The Lighthouse Lab in Cambridge and Alex Alderton, Roberto Amato, Sonia Goncalves, Ewan Harrison, David K. Jackson, Ian Johnston, Dominic Kwiatkowski, Cordelia Langford, John Sillitoe on behalf of the Wellcome Sanger Institute COVID-19 Surveillance Team                                                                                                                                                                                                                                                                                                                                                                                                            |
| EP1_ISL_705102                 | Northumbria University / South Tees Hospitals NHS Foundation Trust / North Tees and Hartlepool NHS Foundation Trust / Newcastle Hospitals NHS Foundation Trust                   | COVID-19 Genomics UK (COG-UK) Consortium                                   | Darren L Smith, Andrew Nelson, Matthew Bashford, Gao R Young, Joshua Job, John Allen, Mohammad A, Tariq Giles S, Holt, Gary Black, Wen C Yew, Lynn Dover, Paul Baker, Steve Liggett, Sarah Essex, Jane Greenaway, Debra Padgett, Clive Graham, Garren Scott, Edward Barton, Emma Swindells, Brendan Payne, Jennifer Collins, Yvstl Taha, Gary Ellingham                                                                                                                                                                                                                                                                                                                             |
| EP1_ISL_705107                 | Lighthouse Lab in Cambridge                                                                                                                                                      | Wellcome Sanger Institute for the COVID-19 Genomics UK (COG-UK) Consortium | Rob Howes, The Lighthouse Lab in Cambridge and Alex Alderton, Roberto Amato, Sonia Goncalves, Ewan Harrison, David K. Jackson, Ian Johnston, Dominic Kwiatkowski, Cordelia Langford, John Sillitoe on behalf of the Wellcome Sanger Institute COVID-19 Surveillance Team                                                                                                                                                                                                                                                                                                                                                                                                            |
| EP1_ISL_705108                 | Liverpool Clinical Laboratories                                                                                                                                                  | COVID-19 Genomics UK (COG-UK) Consortium                                   | Sam Hadenby, Ania Luczak, Steve Paterson, Julian Hiscox, Alistair Darcy, M Aimsaud, A Alrezkhi, Muhammad Alruwaili, Stuart D Armstrong, Jones Benjamin, Eleanor G Bentley, Anu Charwa, Jordan J Clark, Angela Cawell, Richard Eccles, Isabel Garcia-Donval, Matthew Gemmill, Alessandro Gerada, PFR Gilmore, Richard Gregory, Ximeng Han, Catherine Hartley, Margaret Hughes, Miran Iurizza-Gomara, James Johnson, L Liu, Jennifer Manson, Charlotte Nelson, Elaine O'Toole, Cassie Orladi, Rebekah Penrice-Handel, Lucille Rahnov, N P Randle, Trevor Ian Robinson, Parul Sharma, Ghada T Shawil, James P Stewart, Neil Swainston, Ecaterina Varnos, Joanne Waiats, Mark Whitehead |
| EP1_ISL_705109, EP1_ISL_705117 | Lighthouse Lab in Cambridge                                                                                                                                                      | Wellcome Sanger Institute for the COVID-19 Genomics UK (COG-UK) Consortium | Rob Howes, The Lighthouse Lab in Cambridge and Alex Alderton, Roberto Amato, Sonia Goncalves, Ewan Harrison, David K. Jackson, Ian Johnston, Dominic Kwiatkowski, Cordelia Langford, John Sillitoe on behalf of the Wellcome Sanger Institute COVID-19 Surveillance Team                                                                                                                                                                                                                                                                                                                                                                                                            |
| EP1_ISL_705121                 | Liverpool Clinical Laboratories                                                                                                                                                  | COVID-19 Genomics UK (COG-UK) Consortium                                   | Sam Hadenby, Ania Luczak, Steve Paterson, Julian Hiscox, Alistair Darcy, M Aimsaud, A Alrezkhi, Muhammad Alruwaili, Stuart D Armstrong, Jones Benjamin, Eleanor G Bentley, Anu Charwa, Jordan J Clark, Angela Cawell, Richard Eccles, Isabel Garcia-Donval, Matthew Gemmill, Alessandro Gerada, PFR Gilmore, Richard Gregory, Ximeng Han, Catherine Hartley, Margaret Hughes, Miran Iurizza-Gomara, James Johnson, L Liu, Jennifer Manson, Charlotte Nelson, Elaine O'Toole, Cassie Orladi, Rebekah Penrice-Handel, Lucille Rahnov, N P Randle, Trevor Ian Robinson, Parul Sharma, Ghada T Shawil, James P Stewart, Neil Swainston, Ecaterina Varnos, Joanne Waiats, Mark Whitehead |
| EP1_ISL_705124                 | West of Scotland Specialist Virology Centre, NHSGGC / MRC-University of Glasgow Centre for Virus Research                                                                        | COVID-19 Genomics UK (COG-UK) Consortium                                   | Ana de Silva Filipe, Natasha Johnson, Kathy Snodden, Daniel Mar, Stephen Carmichael, Alice Brooks, Lily Tong, James Nichols, Kyriaki Nomiou, Sarah McDonald, Richard Oates, Joseph Hughes, Steen V. Jørgensen, David L Robinson, Alexander Meiri, Alan Roy, Gary Scott, Shafrin Shaaban, Matthew Holder, Rachel Biscoe, Guy Mollett, Kathy L, James Shepherd, Antonia Ho, Emma Thomson                                                                                                                                                                                                                                                                                              |
| EP1_ISL_705126                 | Liverpool Clinical Laboratories                                                                                                                                                  | COVID-19 Genomics UK (COG-UK) Consortium                                   | Sam Hadenby, Ania Luczak, Steve Paterson, Julian Hiscox, Alistair Darcy, M Aimsaud, A Alrezkhi, Muhammad Alruwaili, Stuart D Armstrong, Jones Benjamin, Eleanor G Bentley, Anu Charwa, Jordan J Clark, Angela Cawell, Richard Eccles, Isabel Garcia-Donval, Matthew Gemmill, Alessandro Gerada, PFR Gilmore, Richard Gregory, Ximeng Han, Catherine Hartley, Margaret Hughes, Miran Iurizza-Gomara, James Johnson, L Liu, Jennifer Manson, Charlotte Nelson, Elaine O'Toole, Cassie Orladi, Rebekah Penrice-Handel, Lucille Rahnov, N P Randle, Trevor Ian Robinson, Parul Sharma, Ghada T Shawil, James P Stewart, Neil Swainston, Ecaterina Varnos, Joanne Waiats, Mark Whitehead |
| EP1_ISL_705127, EP1_ISL_705135 | Lighthouse Lab in Cambridge                                                                                                                                                      | Wellcome Sanger Institute for the COVID-19 Genomics UK (COG-UK) Consortium | Rob Howes, The Lighthouse Lab in Cambridge and Alex Alderton, Roberto Amato, Sonia Goncalves, Ewan Harrison, David K. Jackson, Ian Johnston, Dominic Kwiatkowski, Cordelia Langford, John Sillitoe on behalf of the Wellcome Sanger Institute COVID-19 Surveillance Team                                                                                                                                                                                                                                                                                                                                                                                                            |
| EP1_ISL_705137, EP1_ISL_705145 | Northumbria University / South Tees Hospitals NHS Foundation Trust / North Tees and Hartlepool NHS Foundation Trust / Newcastle Hospitals NHS Foundation Trust                   | COVID-19 Genomics UK (COG-UK) Consortium                                   | Darren L Smith, Andrew Nelson, Matthew Bashford, Gao R Young, Joshua Job, John Allen, Mohammad A, Tariq Giles S, Holt, Gary Black, Wen C Yew, Lynn Dover, Paul Baker, Steve Liggett, Sarah Essex, Jane Greenaway, Debra Padgett, Clive Graham, Garren Scott, Edward Barton, Emma Swindells, Brendan Payne, Jennifer Collins, Yvstl Taha, Gary Ellingham                                                                                                                                                                                                                                                                                                                             |
| EP1_ISL_705146, EP1_ISL_705147 | Lighthouse Lab in Cambridge                                                                                                                                                      | Wellcome Sanger Institute for the COVID-19 Genomics UK (COG-UK) Consortium | Rob Howes, The Lighthouse Lab in Cambridge and Alex Alderton, Roberto Amato, Sonia Goncalves, Ewan Harrison, David K. Jackson, Ian Johnston, Dominic Kwiatkowski, Cordelia Langford, John Sillitoe on behalf of the Wellcome Sanger Institute COVID-19 Surveillance Team                                                                                                                                                                                                                                                                                                                                                                                                            |
| EP1_ISL_705150                 | Liverpool Clinical Laboratories                                                                                                                                                  | COVID-19 Genomics UK (COG-UK) Consortium                                   | Sam Hadenby, Ania Luczak, Steve Paterson, Julian Hiscox, Alistair Darcy, M Aimsaud, A Alrezkhi, Muhammad Alruwaili, Stuart D Armstrong, Jones Benjamin, Eleanor G Bentley, Anu Charwa, Jordan J Clark, Angela Cawell, Richard Eccles, Isabel Garcia-Donval, Matthew Gemmill, Alessandro Gerada, PFR Gilmore, Richard Gregory, Ximeng Han, Catherine Hartley, Margaret Hughes, Miran Iurizza-Gomara, James Johnson, L Liu, Jennifer Manson, Charlotte Nelson, Elaine O'Toole, Cassie Orladi, Rebekah Penrice-Handel, Lucille Rahnov, N P Randle, Trevor Ian Robinson, Parul Sharma, Ghada T Shawil, James P Stewart, Neil Swainston, Ecaterina Varnos, Joanne Waiats, Mark Whitehead |
| EP1_ISL_705153                 | Virology Department, Sheffield Teaching Hospitals NHS Foundation Trust/Department of Infection, Immunity and Cardiovascular Disease, The Medical School, University of Sheffield | COVID-19 Genomics UK (COG-UK) Consortium                                   | Thushan de Silva, Matthew Parker, Nikki Smith, Adir Arnyal, Rebecca Brown, Luke Green, Rachel Tucker, Paul Parsons, Danielle Groves, Katie Johnson, Laura Carrilero, Alex Keeley, Dave Partridge, Matthew Wyles, Benjamin Lindsey, Mehmet Yavuz, Mohammad Raza, Carad Evans                                                                                                                                                                                                                                                                                                                                                                                                         |
| EP1_ISL_705155                 | Lighthouse Lab in Cambridge                                                                                                                                                      | Wellcome Sanger Institute for the COVID-19 Genomics UK (COG-UK) Consortium | Rob Howes, The Lighthouse Lab in Cambridge and Alex Alderton, Roberto Amato, Sonia Goncalves, Ewan Harrison, David K. Jackson, Ian Johnston, Dominic Kwiatkowski, Cordelia Langford, John Sillitoe on behalf of the Wellcome Sanger Institute COVID-19 Surveillance Team                                                                                                                                                                                                                                                                                                                                                                                                            |
| EP1_ISL_705161, EP1_ISL_705168 | Liverpool Clinical Laboratories                                                                                                                                                  | COVID-19 Genomics UK (COG-UK) Consortium                                   | Sam Hadenby, Ania Luczak, Steve Paterson, Julian Hiscox, Alistair Darcy, M Aimsaud, A Alrezkhi, Muhammad Alruwaili, Stuart D Armstrong, Jones Benjamin, Eleanor G Bentley, Anu Charwa, Jordan J Clark, Angela Cawell, Richard Eccles, Isabel Garcia-Donval, Matthew Gemmill, Alessandro Gerada, PFR Gilmore, Richard Gregory, Ximeng Han, Catherine Hartley, Margaret Hughes, Miran Iurizza-Gomara, James Johnson, L Liu, Jennifer Manson, Charlotte Nelson, Elaine O'Toole, Cassie Orladi, Rebekah Penrice-Handel, Lucille Rahnov, N P Randle, Trevor Ian Robinson, Parul Sharma, Ghada T Shawil, James P Stewart, Neil Swainston, Ecaterina Varnos, Joanne Waiats, Mark Whitehead |
| EP1_ISL_705174                 | Liverpool Clinical Laboratories                                                                                                                                                  | COVID-19 Genomics UK (COG-UK) Consortium                                   | Rob Howes, The Lighthouse Lab in Cambridge and Alex Alderton, Roberto Amato, Sonia Goncalves, Ewan Harrison, David K. Jackson, Ian Johnston, Dominic Kwiatkowski, Cordelia Langford, John Sillitoe on behalf of the Wellcome Sanger Institute COVID-19 Surveillance Team                                                                                                                                                                                                                                                                                                                                                                                                            |
| EP1_ISL_705180, EP1_ISL_705183 | Lighthouse Lab in Cambridge                                                                                                                                                      | Wellcome Sanger Institute for the COVID-19 Genomics UK (COG-UK) Consortium | Rob Howes, The Lighthouse Lab in Cambridge and Alex Alderton, Roberto Amato, Sonia Goncalves, Ewan Harrison, David K. Jackson, Ian Johnston, Dominic Kwiatkowski, Cordelia Langford, John Sillitoe on behalf of the Wellcome Sanger Institute COVID-19 Surveillance Team                                                                                                                                                                                                                                                                                                                                                                                                            |
| EP1_ISL_705190                 | Liverpool Clinical Laboratories                                                                                                                                                  | COVID-19 Genomics UK (COG-UK) Consortium                                   | Sam Hadenby, Ania Luczak, Steve Paterson, Julian Hiscox, Alistair Darcy, M Aimsaud, A Alrezkhi, Muhammad Alruwaili, Stuart D Armstrong, Jones Benjamin, Eleanor G Bentley, Anu Charwa, Jordan J Clark, Angela Cawell, Richard Eccles, Isabel Garcia-Donval, Matthew Gemmill, Alessandro Gerada, PFR Gilmore, Richard Gregory, Ximeng Han, Catherine Hartley, Margaret Hughes, Miran Iurizza-Gomara, James Johnson, L Liu, Jennifer Manson, Charlotte Nelson, Elaine O'Toole, Cassie Orladi, Rebekah Penrice-Handel, Lucille Rahnov, N P Randle, Trevor Ian Robinson, Parul Sharma, Ghada T Shawil, James P Stewart, Neil Swainston, Ecaterina Varnos, Joanne Waiats, Mark Whitehead |

|                                                                                                                |                                                                                                                                                                                  |  |                                          |                                                                                                                                                                                                                                                                                                                                                                                                                                                                                                                                                                                                                                                                                |
|----------------------------------------------------------------------------------------------------------------|----------------------------------------------------------------------------------------------------------------------------------------------------------------------------------|--|------------------------------------------|--------------------------------------------------------------------------------------------------------------------------------------------------------------------------------------------------------------------------------------------------------------------------------------------------------------------------------------------------------------------------------------------------------------------------------------------------------------------------------------------------------------------------------------------------------------------------------------------------------------------------------------------------------------------------------|
| EP1_ISL_705195                                                                                                 | Virology Department, Sheffield Teaching Hospitals NHS Foundation Trust/Department of Infection, Immunity and Cardiovascular Disease, The Medical School, University of Sheffield |  | COVID-19 Genomics UK (COG-UK) Consortium | Thushan de Silva, Matthew Parker, Nikki Smith, Adri Argyal, Rebecca Brown, Luke Green, Rachel Tucker, Paul Parsons, Danielle Groves, Katie Johnson, Laura Carrilero, Alex Kealey, Dave Partridge, Matthew Wyles, Benjamin Lindsey, Mehmet Yavuz, Mohammad Raza, Carad Evans                                                                                                                                                                                                                                                                                                                                                                                                    |
| EP1_ISL_705196, EP1_ISL_705197, EP1_ISL_705200, EP1_ISL_705202                                                 | Lighthouse Lab in Million Keynes                                                                                                                                                 |  | COVID-19 Genomics UK (COG-UK) Consortium | The Lighthouse Lab in Million Keynes and Alex Alderton, Roberto Amato, Sonia Goncalves, Ewan Harrison, David K, Jackson, Ian Johnston, Dominic Kwiatkowski, Cordelia Langford, John Sillitoe on behalf of the Wellcome Sanger Institute COVID-19 Surveillance Team                                                                                                                                                                                                                                                                                                                                                                                                             |
| EP1_ISL_705204                                                                                                 | Virology Department, Sheffield Teaching Hospitals NHS Foundation Trust/Department of Infection, Immunity and Cardiovascular Disease, The Medical School, University of Sheffield |  | COVID-19 Genomics UK (COG-UK) Consortium | Thushan de Silva, Matthew Parker, Nikki Smith, Adri Argyal, Rebecca Brown, Luke Green, Rachel Tucker, Paul Parsons, Danielle Groves, Katie Johnson, Laura Carrilero, Alex Kealey, Dave Partridge, Matthew Wyles, Benjamin Lindsey, Mehmet Yavuz, Mohammad Raza, Carad Evans                                                                                                                                                                                                                                                                                                                                                                                                    |
| EP1_ISL_705206, EP1_ISL_705208                                                                                 | Liverpool Clinical Laboratories                                                                                                                                                  |  | COVID-19 Genomics UK (COG-UK) Consortium | Sam Haddenby, Anita Luczad, Steve Paterson, Julian Hiscox, Alistair Darcy, M Amsaud, A Alvezali, Muhammad Atruwail, Stuart D Armstrong, Jones Benjamin, Eleanor G Bentley, Anu Chawla, Jordan J Clark, Angela Cowell, Richard Eccles, Isabel Garcia-Donval, Matthew Gemmel, Alessandro Gerada, PKF Gilmore, Richard Gregory, Ximeng Han, Catherine Hartley, Margaret Hughes, Miran Iurtza-Gomara, James Johnson, L Liu, Jennifer Manson, Charlotte Nelson, Elaine O'Toole, Casise Olatelu, Rebekah Penrice-Handal, Lucille Rando, N P Randle, Trevor Ian Robinson, Parul Sharma, Ghada T Shawil, James P Stewart, Neil Swainson, Ecaterina Varnos, Joanne Wats, Mark Whitehead |
| EP1_ISL_705210                                                                                                 | Virology Department, Sheffield Teaching Hospitals NHS Foundation Trust/Department of Infection, Immunity and Cardiovascular Disease, The Medical School, University of Sheffield |  | COVID-19 Genomics UK (COG-UK) Consortium | Thushan de Silva, Matthew Parker, Nikki Smith, Adri Argyal, Rebecca Brown, Luke Green, Rachel Tucker, Paul Parsons, Danielle Groves, Katie Johnson, Laura Carrilero, Alex Kealey, Dave Partridge, Matthew Wyles, Benjamin Lindsey, Mehmet Yavuz, Mohammad Raza, Carad Evans                                                                                                                                                                                                                                                                                                                                                                                                    |
| EP1_ISL_705211                                                                                                 | Quadrant Institute Bioscience                                                                                                                                                    |  | COVID-19 Genomics UK (COG-UK) Consortium | Dave J Baker, Gemma L Kay, Alp Aydin, Thanh Le-Viet, Steven Rudder, Ana P Tedim, Anastasiia Kolyva, Maria Diaz, Leonardo de Oliveira Martins, Nabil-Fareed Alihan, Lizzie Meadows, Rachael Stanley, Ngozi Eunnogo, Muhammad Yasir, Nicholas M. Thompson, Alexander J Trotter, Rachel Gilroy, Samuel Bloomfield, Claire Stuart, Andrew Bell, Reenesh Prakash, Sami Dervisovic, Alison E. Mather, John Wain, Mark Webber, Andrew J Page, Justin O'Grady                                                                                                                                                                                                                          |
| EP1_ISL_705218, EP1_ISL_705221, EP1_ISL_705227                                                                 | Liverpool Clinical Laboratories                                                                                                                                                  |  | COVID-19 Genomics UK (COG-UK) Consortium | Sam Haddenby, Anita Luczad, Steve Paterson, Julian Hiscox, Alistair Darcy, M Amsaud, A Alvezali, Muhammad Atruwail, Stuart D Armstrong, Jones Benjamin, Eleanor G Bentley, Anu Chawla, Jordan J Clark, Angela Cowell, Richard Eccles, Isabel Garcia-Donval, Matthew Gemmel, Alessandro Gerada, PKF Gilmore, Richard Gregory, Ximeng Han, Catherine Hartley, Margaret Hughes, Miran Iurtza-Gomara, James Johnson, L Liu, Jennifer Manson, Charlotte Nelson, Elaine O'Toole, Casise Olatelu, Rebekah Penrice-Handal, Lucille Rando, N P Randle, Trevor Ian Robinson, Parul Sharma, Ghada T Shawil, James P Stewart, Neil Swainson, Ecaterina Varnos, Joanne Wats, Mark Whitehead |
| EP1_ISL_705228                                                                                                 | Quadrant Institute Bioscience                                                                                                                                                    |  | COVID-19 Genomics UK (COG-UK) Consortium | Dave J Baker, Gemma L Kay, Alp Aydin, Thanh Le-Viet, Steven Rudder, Ana P Tedim, Anastasiia Kolyva, Maria Diaz, Leonardo de Oliveira Martins, Nabil-Fareed Alihan, Lizzie Meadows, Rachael Stanley, Ngozi Eunnogo, Muhammad Yasir, Nicholas M. Thompson, Alexander J Trotter, Rachel Gilroy, Samuel Bloomfield, Claire Stuart, Andrew Bell, Reenesh Prakash, Sami Dervisovic, Alison E. Mather, John Wain, Mark Webber, Andrew J Page, Justin O'Grady                                                                                                                                                                                                                          |
| EP1_ISL_705229                                                                                                 | Wales Specialist Virology Centre Sequencing lab: Pathogen Genomics Unit                                                                                                          |  | COVID-19 Genomics UK (COG-UK) Consortium | Catherine Moore, Johnathan Evans, Laura Gifford, Malone Perry, Simon Cottrell, Angela Marchbank, Alec Birchley, Alexander Adams, Amy Gasikin, Bree Gatica-Wilcox, Jason Coombes, Joel Soutirgale, Lauren Gilbert, Lee Graham, Nicole Paochiani, Sara Kunzlenes-Summerhayes, Sarah Taylor, Sophie Jones, Sara Ray, Matthew Bui, Joanne Walkins, Sally Cordeir, Tom Connor                                                                                                                                                                                                                                                                                                       |
| EP1_ISL_705230                                                                                                 | Virology Department, Sheffield Teaching Hospitals NHS Foundation Trust/Department of Infection, Immunity and Cardiovascular Disease, The Medical School, University of Sheffield |  | COVID-19 Genomics UK (COG-UK) Consortium | Thushan de Silva, Matthew Parker, Nikki Smith, Adri Argyal, Rebecca Brown, Luke Green, Rachel Tucker, Paul Parsons, Danielle Groves, Katie Johnson, Laura Carrilero, Alex Kealey, Dave Partridge, Matthew Wyles, Benjamin Lindsey, Mehmet Yavuz, Mohammad Raza, Carad Evans                                                                                                                                                                                                                                                                                                                                                                                                    |
| EP1_ISL_705234                                                                                                 | Centre for Enzyme Innovation, University of Portsmouth / Translational Research Laboratory, Portsmouth Hospitals NHS Trust                                                       |  | COVID-19 Genomics UK (COG-UK) Consortium | Angela Beckett, Yann Bougois, Garry Scarlett, Sharon Glaysier, Scott Elliott, Kelly Dicknell, Robert Inpey, Allyson Loyd, Sarah Wylie, Ethan Butcher, Aroop Chaudhan, Samuel Hobson                                                                                                                                                                                                                                                                                                                                                                                                                                                                                            |
| EP1_ISL_705239                                                                                                 | Wales Specialist Virology Centre Sequencing lab: Pathogen Genomics Unit                                                                                                          |  | COVID-19 Genomics UK (COG-UK) Consortium | Catherine Moore, Johnathan Evans, Laura Gifford, Malone Perry, Simon Cottrell, Angela Marchbank, Alec Birchley, Alexander Adams, Amy Gasikin, Bree Gatica-Wilcox, Jason Coombes, Joel Soutirgale, Lauren Gilbert, Lee Graham, Nicole Paochiani, Sara Kunzlenes-Summerhayes, Sarah Taylor, Sophie Jones, Sara Ray, Matthew Bui, Joanne Walkins, Sally Cordeir, Tom Connor                                                                                                                                                                                                                                                                                                       |
| EP1_ISL_705240, EP1_ISL_705241, EP1_ISL_705242                                                                 | Liverpool Clinical Laboratories                                                                                                                                                  |  | COVID-19 Genomics UK (COG-UK) Consortium | Sam Haddenby, Anita Luczad, Steve Paterson, Julian Hiscox, Alistair Darcy, M Amsaud, A Alvezali, Muhammad Atruwail, Stuart D Armstrong, Jones Benjamin, Eleanor G Bentley, Anu Chawla, Jordan J Clark, Angela Cowell, Richard Eccles, Isabel Garcia-Donval, Matthew Gemmel, Alessandro Gerada, PKF Gilmore, Richard Gregory, Ximeng Han, Catherine Hartley, Margaret Hughes, Miran Iurtza-Gomara, James Johnson, L Liu, Jennifer Manson, Charlotte Nelson, Elaine O'Toole, Casise Olatelu, Rebekah Penrice-Handal, Lucille Rando, N P Randle, Trevor Ian Robinson, Parul Sharma, Ghada T Shawil, James P Stewart, Neil Swainson, Ecaterina Varnos, Joanne Wats, Mark Whitehead |
| EP1_ISL_705243                                                                                                 | University College London, Great Ormond Street Hospital for Children NHS Foundation Trust, Imperial College Healthcare NHS Trust                                                 |  | COVID-19 Genomics UK (COG-UK) Consortium | Sergi Castellano, Rachael Williams, Mark Kristiansen, Paola Resende Silva, Surando Roy, Tony Brooks, Helena Tujill, Paula Nicola, Patricia Dyal, Charlotte Williams, Leysa Forast, Yasmin Panchbhaya, Jacqueline Findley, Samuel Weeks, Julianne Brown, Kathryn Harris, Paul Randal, James Price, Alison Holmes, Judith Breuer                                                                                                                                                                                                                                                                                                                                                 |
| EP1_ISL_705246, EP1_ISL_705248                                                                                 | Liverpool Clinical Laboratories                                                                                                                                                  |  | COVID-19 Genomics UK (COG-UK) Consortium | Sam Haddenby, Anita Luczad, Steve Paterson, Julian Hiscox, Alistair Darcy, M Amsaud, A Alvezali, Muhammad Atruwail, Stuart D Armstrong, Jones Benjamin, Eleanor G Bentley, Anu Chawla, Jordan J Clark, Angela Cowell, Richard Eccles, Isabel Garcia-Donval, Matthew Gemmel, Alessandro Gerada, PKF Gilmore, Richard Gregory, Ximeng Han, Catherine Hartley, Margaret Hughes, Miran Iurtza-Gomara, James Johnson, L Liu, Jennifer Manson, Charlotte Nelson, Elaine O'Toole, Casise Olatelu, Rebekah Penrice-Handal, Lucille Rando, N P Randle, Trevor Ian Robinson, Parul Sharma, Ghada T Shawil, James P Stewart, Neil Swainson, Ecaterina Varnos, Joanne Wats, Mark Whitehead |
| EP1_ISL_705249                                                                                                 | Centre for Enzyme Innovation, University of Portsmouth / Translational Research Laboratory, Portsmouth Hospitals NHS Trust                                                       |  | COVID-19 Genomics UK (COG-UK) Consortium | Angela Beckett, Yann Bougois, Garry Scarlett, Sharon Glaysier, Scott Elliott, Kelly Dicknell, Robert Inpey, Allyson Loyd, Sarah Wylie, Ethan Butcher, Aroop Chaudhan, Samuel Hobson                                                                                                                                                                                                                                                                                                                                                                                                                                                                                            |
| EP1_ISL_705250                                                                                                 | Liverpool Clinical Laboratories                                                                                                                                                  |  | COVID-19 Genomics UK (COG-UK) Consortium | Sam Haddenby, Anita Luczad, Steve Paterson, Julian Hiscox, Alistair Darcy, M Amsaud, A Alvezali, Muhammad Atruwail, Stuart D Armstrong, Jones Benjamin, Eleanor G Bentley, Anu Chawla, Jordan J Clark, Angela Cowell, Richard Eccles, Isabel Garcia-Donval, Matthew Gemmel, Alessandro Gerada, PKF Gilmore, Richard Gregory, Ximeng Han, Catherine Hartley, Margaret Hughes, Miran Iurtza-Gomara, James Johnson, L Liu, Jennifer Manson, Charlotte Nelson, Elaine O'Toole, Casise Olatelu, Rebekah Penrice-Handal, Lucille Rando, N P Randle, Trevor Ian Robinson, Parul Sharma, Ghada T Shawil, James P Stewart, Neil Swainson, Ecaterina Varnos, Joanne Wats, Mark Whitehead |
| EP1_ISL_705255                                                                                                 | Quadrant Institute Bioscience                                                                                                                                                    |  | COVID-19 Genomics UK (COG-UK) Consortium | Dave J Baker, Gemma L Kay, Alp Aydin, Thanh Le-Viet, Steven Rudder, Ana P Tedim, Anastasiia Kolyva, Maria Diaz, Leonardo de Oliveira Martins, Nabil-Fareed Alihan, Lizzie Meadows, Rachael Stanley, Ngozi Eunnogo, Muhammad Yasir, Nicholas M. Thompson, Alexander J Trotter, Rachel Gilroy, Samuel Bloomfield, Claire Stuart, Andrew Bell, Reenesh Prakash, Sami Dervisovic, Alison E. Mather, John Wain, Mark Webber, Andrew J Page, Justin O'Grady                                                                                                                                                                                                                          |
| EP1_ISL_705259, EP1_ISL_705260, EP1_ISL_705263, EP1_ISL_705264, EP1_ISL_705267, EP1_ISL_705269, EP1_ISL_705271 | Liverpool Clinical Laboratories                                                                                                                                                  |  | COVID-19 Genomics UK (COG-UK) Consortium | Sam Haddenby, Anita Luczad, Steve Paterson, Julian Hiscox, Alistair Darcy, M Amsaud, A Alvezali, Muhammad Atruwail, Stuart D Armstrong, Jones Benjamin, Eleanor G Bentley, Anu Chawla, Jordan J Clark, Angela Cowell, Richard Eccles, Isabel Garcia-Donval, Matthew Gemmel, Alessandro Gerada, PKF Gilmore, Richard Gregory, Ximeng Han, Catherine Hartley, Margaret Hughes, Miran Iurtza-Gomara, James Johnson, L Liu, Jennifer Manson, Charlotte Nelson, Elaine O'Toole, Casise Olatelu, Rebekah Penrice-Handal, Lucille Rando, N P Randle, Trevor Ian Robinson, Parul Sharma, Ghada T Shawil, James P Stewart, Neil Swainson, Ecaterina Varnos, Joanne Wats, Mark Whitehead |
| EP1_ISL_705272                                                                                                 | Virology Department, Sheffield Teaching Hospitals NHS Foundation Trust/Department of Infection, Immunity and                                                                     |  | COVID-19 Genomics UK (COG-UK) Consortium | Thushan de Silva, Matthew Parker, Nikki Smith, Adri Argyal, Rebecca Brown, Luke Green, Rachel Tucker, Paul Parsons, Danielle Groves, Katie Johnson, Laura Carrilero, Alex Kealey, Dave Partridge, Matthew Wyles, Benjamin Lindsey, Mehmet Yavuz, Mohammad Raza, Carad Evans                                                                                                                                                                                                                                                                                                                                                                                                    |

|                                                                                                                |                                                                                                                                                                                                                 |                                          |                                                                                                                                                                                                                                                                                                                                                                                                                                                                                                                                                                                                                                                                                     |
|----------------------------------------------------------------------------------------------------------------|-----------------------------------------------------------------------------------------------------------------------------------------------------------------------------------------------------------------|------------------------------------------|-------------------------------------------------------------------------------------------------------------------------------------------------------------------------------------------------------------------------------------------------------------------------------------------------------------------------------------------------------------------------------------------------------------------------------------------------------------------------------------------------------------------------------------------------------------------------------------------------------------------------------------------------------------------------------------|
| EPI_ISL_705273                                                                                                 | Cardiovascular Disease, The Medical School, University of Sheffield                                                                                                                                             | COVID-19 Genomics UK (COG-UK) Consortium | Darren L Smith, Andrew Nelson, Matthew Easton, Gagr R Young, Joshua Loh, John Allan, Mohammad A Tariq, Giles S Holt, Gary Black, Wen C Yew, Lynn Dover, Paul Baker, Steve Liggitt, Sarah Essex, Jane Greenaway, Debra Padgett, Olive Graham, Garen Scott, Edward Barton, Emma Swindells, Brendan Payne, Jennifer Collins, Yusril Taha, Gary Eltringham                                                                                                                                                                                                                                                                                                                              |
| EPI_ISL_705274                                                                                                 | Northumbria University / South Tees Hospitals NHS Foundation Trust / North Tees and Hartlepool NHS Foundation Trust / Newcastle Hospitals NHS Foundation Trust                                                  | COVID-19 Genomics UK (COG-UK) Consortium | Sam Hadenby, Anita Lucaci, Steve Paterson, Julian Hiscox, Alistair Dardy, M Aimsaud, A Alvezzihi, Muhammad Alruwaili, Stuart D Armstrong, Jones Benjamin, Eleanor G Bentley, Anu Chawla, Jordan J Clark, Angela Cowell, Richard Eccles, Isabel Garcia-Donval, Matthew Gemmill, Alessandro Gerada, PKF Gilmore, Richard Gregory, Ximeng Han, Catherine Hartley, Margaret Hughes, Miran Iuriza-Gomara, James Johnson, L Liu, Jennifer Manson, Charlotte Nelson, Elaine O'Toole, Cassie Orlaolu, Rebekah Penrice-Handal, Lucille Rahnou, N P Randle, Trevor Ian Robinson, Parul Sharma, Ghada T Shawli, James P Stewart, Neil Swainston, Ecaterina Varnos, Joanne Wats, Mark Whitehead |
| EPI_ISL_705276                                                                                                 | Virlogy Department, Sheffield Teaching Hospitals NHS Foundation Trust/Department of Infection, Immunity and Cardiovascular Disease, The Medical School, University of Sheffield                                 | COVID-19 Genomics UK (COG-UK) Consortium | Thushan de Silva, Matthew Parker, Nikki Smith, Aidi Argyaki, Rebecca Brown, Luke Green, Rachel Tucker, Paul Parsons, Danielle Groves, Katie Johnson, Laura Carrilero, Alex Keeley, Dave Partridge, Matthew Wyles, Benjamin Lindsey, Mehmet Yavuz, Mohammed Raza, Carrad Evans                                                                                                                                                                                                                                                                                                                                                                                                       |
| EPI_ISL_705279, EPI_ISL_705280, EPI_ISL_705281                                                                 | Northumbria University / South Tees Hospitals NHS Foundation Trust / North Tees and Hartlepool NHS Foundation Trust / Newcastle Hospitals NHS Foundation Trust                                                  | COVID-19 Genomics UK (COG-UK) Consortium | Darren L Smith, Andrew Nelson, Matthew Easton, Gagr R Young, Joshua Loh, John Allan, Mohammad A Tariq, Giles S Holt, Gary Black, Wen C Yew, Lynn Dover, Paul Baker, Steve Liggitt, Sarah Essex, Jane Greenaway, Debra Padgett, Olive Graham, Garen Scott, Edward Barton, Emma Swindells, Brendan Payne, Jennifer Collins, Yusril Taha, Gary Eltringham                                                                                                                                                                                                                                                                                                                              |
| EPI_ISL_705283                                                                                                 | University College London, Great Ormond Street Hospital for Children NHS Foundation Trust, Imperial College Healthcare NHS Trust                                                                                | COVID-19 Genomics UK (COG-UK) Consortium | Sergi Castellano, Rachel Williams, Mark Kristiansen, Paola Resende Silva, Surando Poy, Tony Brooks, Helena Tullj, Paola Niola, Patricia Dyal, Charlotte Williams, Leyza Forrest, Yasmin Panchbhaya, Jacqueline Findlay, Samuel Weeks, Julianne Brown, Kathryn Harris, Paul Randlel, James Price, Alison Holmes, Judith Breuer                                                                                                                                                                                                                                                                                                                                                       |
| EPI_ISL_705286                                                                                                 | Liverpool Clinical Laboratories                                                                                                                                                                                 | COVID-19 Genomics UK (COG-UK) Consortium | Sam Hadenby, Anita Lucaci, Steve Paterson, Julian Hiscox, Alistair Dardy, M Aimsaud, A Alvezzihi, Muhammad Alruwaili, Stuart D Armstrong, Jones Benjamin, Eleanor G Bentley, Anu Chawla, Jordan J Clark, Angela Cowell, Richard Eccles, Isabel Garcia-Donval, Matthew Gemmill, Alessandro Gerada, PKF Gilmore, Richard Gregory, Ximeng Han, Catherine Hartley, Margaret Hughes, Miran Iuriza-Gomara, James Johnson, L Liu, Jennifer Manson, Charlotte Nelson, Elaine O'Toole, Cassie Orlaolu, Rebekah Penrice-Handal, Lucille Rahnou, N P Randle, Trevor Ian Robinson, Parul Sharma, Ghada T Shawli, James P Stewart, Neil Swainston, Ecaterina Varnos, Joanne Wats, Mark Whitehead |
| EPI_ISL_705290                                                                                                 | Department of Pathology, University of Cambridge                                                                                                                                                                | COVID-19 Genomics UK (COG-UK) Consortium | Aminu S. Jahun, Yasmin Chaudhry, Grant Hall, Iliana Georgiana, Myra Hosmillo, Martin D. Curran, Maile Prickett, Surendra Parmar, Ian Goodfellow                                                                                                                                                                                                                                                                                                                                                                                                                                                                                                                                     |
| EPI_ISL_705291, EPI_ISL_705292, EPI_ISL_705298, EPI_ISL_705299, EPI_ISL_705301, EPI_ISL_705304, EPI_ISL_705305 | Liverpool Clinical Laboratories                                                                                                                                                                                 | COVID-19 Genomics UK (COG-UK) Consortium | Sam Hadenby, Anita Lucaci, Steve Paterson, Julian Hiscox, Alistair Dardy, M Aimsaud, A Alvezzihi, Muhammad Alruwaili, Stuart D Armstrong, Jones Benjamin, Eleanor G Bentley, Anu Chawla, Jordan J Clark, Angela Cowell, Richard Eccles, Isabel Garcia-Donval, Matthew Gemmill, Alessandro Gerada, PKF Gilmore, Richard Gregory, Ximeng Han, Catherine Hartley, Margaret Hughes, Miran Iuriza-Gomara, James Johnson, L Liu, Jennifer Manson, Charlotte Nelson, Elaine O'Toole, Cassie Orlaolu, Rebekah Penrice-Handal, Lucille Rahnou, N P Randle, Trevor Ian Robinson, Parul Sharma, Ghada T Shawli, James P Stewart, Neil Swainston, Ecaterina Varnos, Joanne Wats, Mark Whitehead |
| EPI_ISL_705306                                                                                                 | Wales Specialist Virology Centre Sequencing lab: Pathogen Genomics Unit                                                                                                                                         | COVID-19 Genomics UK (COG-UK) Consortium | Catherine Moore, Johnathan Evans, Laura Gifford, Malorie Perry, Simon Cottrell, Angela Marchbank, Alec Birchley, Alexander Adams, Amy Gaskin, Bree Gatica-Wilcox, Jason Coombes, Joel Southgate, Lauren Gilbert, Lee Graham, Nicole Frachinelli, Sara Kunzrens-Summerhayes, Sarah Taylor, Sophie Jones, Sara Hay, Matthew Bull, Joanne Watkins, Sally Corden, Tom Connor                                                                                                                                                                                                                                                                                                            |
| EPI_ISL_705311, EPI_ISL_705313, EPI_ISL_705314, EPI_ISL_705318, EPI_ISL_705321, EPI_ISL_705324                 | Liverpool Clinical Laboratories                                                                                                                                                                                 | COVID-19 Genomics UK (COG-UK) Consortium | Sam Hadenby, Anita Lucaci, Steve Paterson, Julian Hiscox, Alistair Dardy, M Aimsaud, A Alvezzihi, Muhammad Alruwaili, Stuart D Armstrong, Jones Benjamin, Eleanor G Bentley, Anu Chawla, Jordan J Clark, Angela Cowell, Richard Eccles, Isabel Garcia-Donval, Matthew Gemmill, Alessandro Gerada, PKF Gilmore, Richard Gregory, Ximeng Han, Catherine Hartley, Margaret Hughes, Miran Iuriza-Gomara, James Johnson, L Liu, Jennifer Manson, Charlotte Nelson, Elaine O'Toole, Cassie Orlaolu, Rebekah Penrice-Handal, Lucille Rahnou, N P Randle, Trevor Ian Robinson, Parul Sharma, Ghada T Shawli, James P Stewart, Neil Swainston, Ecaterina Varnos, Joanne Wats, Mark Whitehead |
| EPI_ISL_705327                                                                                                 | Wales Specialist Virology Centre Sequencing lab: Pathogen Genomics Unit                                                                                                                                         | COVID-19 Genomics UK (COG-UK) Consortium | Catherine Moore, Johnathan Evans, Laura Gifford, Malorie Perry, Simon Cottrell, Angela Marchbank, Alec Birchley, Alexander Adams, Amy Gaskin, Bree Gatica-Wilcox, Jason Coombes, Joel Southgate, Lauren Gilbert, Lee Graham, Nicole Frachinelli, Sara Kunzrens-Summerhayes, Sarah Taylor, Sophie Jones, Sara Hay, Matthew Bull, Joanne Watkins, Sally Corden, Tom Connor                                                                                                                                                                                                                                                                                                            |
| EPI_ISL_705329                                                                                                 | Liverpool Clinical Laboratories                                                                                                                                                                                 | COVID-19 Genomics UK (COG-UK) Consortium | Sam Hadenby, Anita Lucaci, Steve Paterson, Julian Hiscox, Alistair Dardy, M Aimsaud, A Alvezzihi, Muhammad Alruwaili, Stuart D Armstrong, Jones Benjamin, Eleanor G Bentley, Anu Chawla, Jordan J Clark, Angela Cowell, Richard Eccles, Isabel Garcia-Donval, Matthew Gemmill, Alessandro Gerada, PKF Gilmore, Richard Gregory, Ximeng Han, Catherine Hartley, Margaret Hughes, Miran Iuriza-Gomara, James Johnson, L Liu, Jennifer Manson, Charlotte Nelson, Elaine O'Toole, Cassie Orlaolu, Rebekah Penrice-Handal, Lucille Rahnou, N P Randle, Trevor Ian Robinson, Parul Sharma, Ghada T Shawli, James P Stewart, Neil Swainston, Ecaterina Varnos, Joanne Wats, Mark Whitehead |
| EPI_ISL_705333                                                                                                 | Department of Pathology, University of Cambridge                                                                                                                                                                | COVID-19 Genomics UK (COG-UK) Consortium | Aminu S. Jahun, Yasmin Chaudhry, Grant Hall, Iliana Georgiana, Myra Hosmillo, Martin D. Curran, Maile Prickett, Surendra Parmar, Ian Goodfellow                                                                                                                                                                                                                                                                                                                                                                                                                                                                                                                                     |
| EPI_ISL_705334, EPI_ISL_705336                                                                                 | Liverpool Clinical Laboratories                                                                                                                                                                                 | COVID-19 Genomics UK (COG-UK) Consortium | Sam Hadenby, Anita Lucaci, Steve Paterson, Julian Hiscox, Alistair Dardy, M Aimsaud, A Alvezzihi, Muhammad Alruwaili, Stuart D Armstrong, Jones Benjamin, Eleanor G Bentley, Anu Chawla, Jordan J Clark, Angela Cowell, Richard Eccles, Isabel Garcia-Donval, Matthew Gemmill, Alessandro Gerada, PKF Gilmore, Richard Gregory, Ximeng Han, Catherine Hartley, Margaret Hughes, Miran Iuriza-Gomara, James Johnson, L Liu, Jennifer Manson, Charlotte Nelson, Elaine O'Toole, Cassie Orlaolu, Rebekah Penrice-Handal, Lucille Rahnou, N P Randle, Trevor Ian Robinson, Parul Sharma, Ghada T Shawli, James P Stewart, Neil Swainston, Ecaterina Varnos, Joanne Wats, Mark Whitehead |
| EPI_ISL_705337                                                                                                 | University College London, Great Ormond Street Hospital for Children NHS Foundation Trust, Imperial College Healthcare NHS Trust                                                                                | COVID-19 Genomics UK (COG-UK) Consortium | Sergi Castellano, Rachel Williams, Mark Kristiansen, Paola Resende Silva, Surando Poy, Tony Brooks, Helena Tullj, Paola Niola, Patricia Dyal, Charlotte Williams, Leyza Forrest, Yasmin Panchbhaya, Jacqueline Findlay, Samuel Weeks, Julianne Brown, Kathryn Harris, Paul Randlel, James Price, Alison Holmes, Judith Breuer                                                                                                                                                                                                                                                                                                                                                       |
| EPI_ISL_705340                                                                                                 | Liverpool Clinical Laboratories                                                                                                                                                                                 | COVID-19 Genomics UK (COG-UK) Consortium | Sam Hadenby, Anita Lucaci, Steve Paterson, Julian Hiscox, Alistair Dardy, M Aimsaud, A Alvezzihi, Muhammad Alruwaili, Stuart D Armstrong, Jones Benjamin, Eleanor G Bentley, Anu Chawla, Jordan J Clark, Angela Cowell, Richard Eccles, Isabel Garcia-Donval, Matthew Gemmill, Alessandro Gerada, PKF Gilmore, Richard Gregory, Ximeng Han, Catherine Hartley, Margaret Hughes, Miran Iuriza-Gomara, James Johnson, L Liu, Jennifer Manson, Charlotte Nelson, Elaine O'Toole, Cassie Orlaolu, Rebekah Penrice-Handal, Lucille Rahnou, N P Randle, Trevor Ian Robinson, Parul Sharma, Ghada T Shawli, James P Stewart, Neil Swainston, Ecaterina Varnos, Joanne Wats, Mark Whitehead |
| EPI_ISL_705346                                                                                                 | Northumbria University / South Tees Hospitals NHS Foundation Trust / North Tees and Hartlepool NHS Foundation Trust / Newcastle Hospitals NHS Foundation Trust                                                  | COVID-19 Genomics UK (COG-UK) Consortium | Darren L Smith, Andrew Nelson, Matthew Easton, Gagr R Young, Joshua Loh, John Allan, Mohammad A Tariq, Giles S Holt, Gary Black, Wen C Yew, Lynn Dover, Paul Baker, Steve Liggitt, Sarah Essex, Jane Greenaway, Debra Padgett, Olive Graham, Garen Scott, Edward Barton, Emma Swindells, Brendan Payne, Jennifer Collins, Yusril Taha, Gary Eltringham                                                                                                                                                                                                                                                                                                                              |
| EPI_ISL_705347, EPI_ISL_705349, EPI_ISL_705350, EPI_ISL_705358, EPI_ISL_705360                                 | Department of Pathology, University of Cambridge                                                                                                                                                                | COVID-19 Genomics UK (COG-UK) Consortium | Sergi Castellano, Rachel Williams, Mark Kristiansen, Paola Resende Silva, Surando Poy, Tony Brooks, Helena Tullj, Paola Niola, Patricia Dyal, Charlotte Williams, Leyza Forrest, Yasmin Panchbhaya, Jacqueline Findlay, Samuel Weeks, Julianne Brown, Kathryn Harris, Paul Randlel, James Price, Alison Holmes, Judith Breuer                                                                                                                                                                                                                                                                                                                                                       |
| EPI_ISL_705361                                                                                                 | Liverpool Clinical Laboratories                                                                                                                                                                                 | COVID-19 Genomics UK (COG-UK) Consortium | Sam Hadenby, Anita Lucaci, Steve Paterson, Julian Hiscox, Alistair Dardy, M Aimsaud, A Alvezzihi, Muhammad Alruwaili, Stuart D Armstrong, Jones Benjamin, Eleanor G Bentley, Anu Chawla, Jordan J Clark, Angela Cowell, Richard Eccles, Isabel Garcia-Donval, Matthew Gemmill, Alessandro Gerada, PKF Gilmore, Richard Gregory, Ximeng Han, Catherine Hartley, Margaret Hughes, Miran Iuriza-Gomara, James Johnson, L Liu, Jennifer Manson, Charlotte Nelson, Elaine O'Toole, Cassie Orlaolu, Rebekah Penrice-Handal, Lucille Rahnou, N P Randle, Trevor Ian Robinson, Parul Sharma, Ghada T Shawli, James P Stewart, Neil Swainston, Ecaterina Varnos, Joanne Wats, Mark Whitehead |
| EPI_ISL_705361                                                                                                 | Northumbria University / South Tees Hospitals NHS Foundation Trust / North Tees and Hartlepool NHS Foundation Trust / North Tees and Hartlepool NHS Foundation Trust / Newcastle Hospitals NHS Foundation Trust | COVID-19 Genomics UK (COG-UK) Consortium | Darren L Smith, Andrew Nelson, Matthew Easton, Gagr R Young, Joshua Loh, John Allan, Mohammad A Tariq, Giles S Holt, Gary Black, Wen C Yew, Lynn Dover, Paul Baker, Steve Liggitt, Sarah Essex, Jane Greenaway, Debra Padgett, Olive Graham, Garen Scott, Edward Barton, Emma Swindells, Brendan Payne, Jennifer Collins, Yusril Taha, Gary Eltringham                                                                                                                                                                                                                                                                                                                              |

|                 |                                                                                                                                                                |                                          |                                                                                                                                                                                                                                                                                                                                                                                                                                                                                                                                                                                                                                                                                         |
|-----------------|----------------------------------------------------------------------------------------------------------------------------------------------------------------|------------------------------------------|-----------------------------------------------------------------------------------------------------------------------------------------------------------------------------------------------------------------------------------------------------------------------------------------------------------------------------------------------------------------------------------------------------------------------------------------------------------------------------------------------------------------------------------------------------------------------------------------------------------------------------------------------------------------------------------------|
| EPI_ISL_705363  | Liverpool Clinical Laboratories                                                                                                                                | COVID-19 Genomics UK (COG-UK) Consortium | Sam Haddenby, Anita Luczad, Steve Paterson, Julian Hiscox, Alistair Darty, M Aimsaud, A Alvezahli, Muhammad Alruwaili, Stuart D Armstrong, Jones Benjamin, Eleanor G Bentley, Anu Chawla, Jordan J Clark, Angela Cowell, Richard Eccles, Isabel Garcia-Domval, Matthew Gemmill, Alessandro Gerada, PFR Gilmore, Richard Gregory, Ximeng Han, Catherine Hartley, Margaret Hughes, Miran Iurtza-Gomara, James Johnson, L Liu, Jennifer Manson, Charlotte Nelson, Elaine O'Toole, Cassie Orlateli, Rebekah Penrice-Handel, Lucille Randolph, N P Randle, Trevor Ian Robinson, Parul Sharma, Ghada T Shawli, James P Stewart, Neil Swainson, Ecaterina Varnos, Joanne Watts, Mark Whitehead |
| EPI_ISL_705365  | Department of Pathology, University of Cambridge                                                                                                               | COVID-19 Genomics UK (COG-UK) Consortium | Aminu S. Jahnu, Yasmin Chaudhry, Grant Hall, Iliana Georgiana, Myra Hosnillo, Martin D Curran, Malte Prickett, Surendra Parmar, Ian Goodfellow                                                                                                                                                                                                                                                                                                                                                                                                                                                                                                                                          |
| EPI_ISL_705367  | Northumbria University / South Tees Hospitals NHS Foundation Trust / North Tees and Hartlepool NHS Foundation Trust / Newcastle Hospitals NHS Foundation Trust | COVID-19 Genomics UK (COG-UK) Consortium | Darren L Smith, Andrew Nelson, Matthew Bastion, Greg R Young, Joshua Loh, John Allan, Mohammad A Tariq, Giles S Holt, Gary Black, Wen C Yew, Lynn Dover, Paul Baker, Steve Liggett, Sarah Essex, Jane Greenaway, Debra Padgett, Olive Graham, Garen Scott, Edward Barton, Emma Swindells, Brendan Payne, Jennifer Collins, Yvstl Taha, Gary Eltringham                                                                                                                                                                                                                                                                                                                                  |
| EPI_ISL_705372  | Liverpool Clinical Laboratories                                                                                                                                | COVID-19 Genomics UK (COG-UK) Consortium | Judith Heaney, Matthew Byott, Catherine Hourigan, Dan Frampton, Stuart Kirk, Maria Szyer, and Eleri Nestouli                                                                                                                                                                                                                                                                                                                                                                                                                                                                                                                                                                            |
| EPI_ISL_705378  | University College London Hospital                                                                                                                             | COVID-19 Genomics UK (COG-UK) Consortium | Darren L Smith, Andrew Nelson, Matthew Bastion, Greg R Young, Joshua Loh, John Allan, Mohammad A Tariq, Giles S Holt, Gary Black, Wen C Yew, Lynn Dover, Paul Baker, Steve Liggett, Sarah Essex, Jane Greenaway, Debra Padgett, Olive Graham, Garen Scott, Edward Barton, Emma Swindells, Brendan Payne, Jennifer Collins, Yvstl Taha, Gary Eltringham                                                                                                                                                                                                                                                                                                                                  |
| EPI_ISL_705381  | Northumbria University / South Tees Hospitals NHS Foundation Trust / North Tees and Hartlepool NHS Foundation Trust / Newcastle Hospitals NHS Foundation Trust | COVID-19 Genomics UK (COG-UK) Consortium | Aminu S. Jahnu, Yasmin Chaudhry, Grant Hall, Iliana Georgiana, Myra Hosnillo, Martin D Curran, Malte Prickett, Surendra Parmar, Ian Goodfellow                                                                                                                                                                                                                                                                                                                                                                                                                                                                                                                                          |
| EPI_ISL_705382  | Department of Pathology, University of Cambridge                                                                                                               | COVID-19 Genomics UK (COG-UK) Consortium | Ban Templeton, Aaron Jeffries, Michelle Michelsen, Joanna Warwick-Duggdale, Audrey Fardos, Robyn Manley, Stephen Mitchell, Jane Masoli                                                                                                                                                                                                                                                                                                                                                                                                                                                                                                                                                  |
| EPI_ISL_705383  | University of Exeter                                                                                                                                           | COVID-19 Genomics UK (COG-UK) Consortium | Sam Haddenby, Anita Luczad, Steve Paterson, Julian Hiscox, Alistair Darty, M Aimsaud, A Alvezahli, Muhammad Alruwaili, Stuart D Armstrong, Jones Benjamin, Eleanor G Bentley, Anu Chawla, Jordan J Clark, Angela Cowell, Richard Eccles, Isabel Garcia-Domval, Matthew Gemmill, Alessandro Gerada, PFR Gilmore, Richard Gregory, Ximeng Han, Catherine Hartley, Margaret Hughes, Miran Iurtza-Gomara, James Johnson, L Liu, Jennifer Manson, Charlotte Nelson, Elaine O'Toole, Cassie Orlateli, Rebekah Penrice-Handel, Lucille Randolph, N P Randle, Trevor Ian Robinson, Parul Sharma, Ghada T Shawli, James P Stewart, Neil Swainson, Ecaterina Varnos, Joanne Watts, Mark Whitehead |
| EPI_ISL_705386  | Liverpool Clinical Laboratories                                                                                                                                | COVID-19 Genomics UK (COG-UK) Consortium | Ana da Silva Filipe, Nalasha Johnson, Kathy Snodlett, Daniel Mair, Stephen Carmichael, Alice Boos, Lily Tong, Janna Nichols, Kyriaki Nomioku, Sarah McDonald, Richard Orton, Joseph Hughes, Steven Valtipally, David L Robertson, Alasdair MacLellan, Rory Gurnson, Sharif Shaaban, Matthew Holden, Rachel Baccow, Guy Mollett, Kathy U, James Shepherd, Antonia Ho, Emma Thomson                                                                                                                                                                                                                                                                                                       |
| EPI_ISL_705387  | Liverpool Clinical Laboratories                                                                                                                                | COVID-19 Genomics UK (COG-UK) Consortium | Sam Haddenby, Anita Luczad, Steve Paterson, Julian Hiscox, Alistair Darty, M Aimsaud, A Alvezahli, Muhammad Alruwaili, Stuart D Armstrong, Jones Benjamin, Eleanor G Bentley, Anu Chawla, Jordan J Clark, Angela Cowell, Richard Eccles, Isabel Garcia-Domval, Matthew Gemmill, Alessandro Gerada, PFR Gilmore, Richard Gregory, Ximeng Han, Catherine Hartley, Margaret Hughes, Miran Iurtza-Gomara, James Johnson, L Liu, Jennifer Manson, Charlotte Nelson, Elaine O'Toole, Cassie Orlateli, Rebekah Penrice-Handel, Lucille Randolph, N P Randle, Trevor Ian Robinson, Parul Sharma, Ghada T Shawli, James P Stewart, Neil Swainson, Ecaterina Varnos, Joanne Watts, Mark Whitehead |
| EPI_ISL_705389  | Liverpool Clinical Laboratories                                                                                                                                | COVID-19 Genomics UK (COG-UK) Consortium | Ana da Silva Filipe, Nalasha Johnson, Kathy Snodlett, Daniel Mair, Stephen Carmichael, Alice Boos, Lily Tong, Janna Nichols, Kyriaki Nomioku, Sarah McDonald, Richard Orton, Joseph Hughes, Steven Valtipally, David L Robertson, Alasdair MacLellan, Rory Gurnson, Sharif Shaaban, Matthew Holden, Rachel Baccow, Guy Mollett, Kathy U, James Shepherd, Antonia Ho, Emma Thomson                                                                                                                                                                                                                                                                                                       |
| EPI_ISL_705393  | Liverpool Clinical Laboratories                                                                                                                                | COVID-19 Genomics UK (COG-UK) Consortium | Sam Haddenby, Anita Luczad, Steve Paterson, Julian Hiscox, Alistair Darty, M Aimsaud, A Alvezahli, Muhammad Alruwaili, Stuart D Armstrong, Jones Benjamin, Eleanor G Bentley, Anu Chawla, Jordan J Clark, Angela Cowell, Richard Eccles, Isabel Garcia-Domval, Matthew Gemmill, Alessandro Gerada, PFR Gilmore, Richard Gregory, Ximeng Han, Catherine Hartley, Margaret Hughes, Miran Iurtza-Gomara, James Johnson, L Liu, Jennifer Manson, Charlotte Nelson, Elaine O'Toole, Cassie Orlateli, Rebekah Penrice-Handel, Lucille Randolph, N P Randle, Trevor Ian Robinson, Parul Sharma, Ghada T Shawli, James P Stewart, Neil Swainson, Ecaterina Varnos, Joanne Watts, Mark Whitehead |
| EPI_ISL_705394  | Liverpool Clinical Laboratories                                                                                                                                | COVID-19 Genomics UK (COG-UK) Consortium | Ana da Silva Filipe, Nalasha Johnson, Kathy Snodlett, Daniel Mair, Stephen Carmichael, Alice Boos, Lily Tong, Janna Nichols, Kyriaki Nomioku, Sarah McDonald, Richard Orton, Joseph Hughes, Steven Valtipally, David L Robertson, Alasdair MacLellan, Rory Gurnson, Sharif Shaaban, Matthew Holden, Rachel Baccow, Guy Mollett, Kathy U, James Shepherd, Antonia Ho, Emma Thomson                                                                                                                                                                                                                                                                                                       |
| EPI_ISL_705399  | West of Scotland Specialist Virology Centre, NHSGCG / MRC-University of Glasgow Centre for Virus Research                                                      | COVID-19 Genomics UK (COG-UK) Consortium | Rachel Baccow, Guy Mollett, Kathy U, James Shepherd, Antonia Ho, Emma Thomson                                                                                                                                                                                                                                                                                                                                                                                                                                                                                                                                                                                                           |
| EPI_ISL_705402  | Liverpool Clinical Laboratories                                                                                                                                | COVID-19 Genomics UK (COG-UK) Consortium | Sam Haddenby, Anita Luczad, Steve Paterson, Julian Hiscox, Alistair Darty, M Aimsaud, A Alvezahli, Muhammad Alruwaili, Stuart D Armstrong, Jones Benjamin, Eleanor G Bentley, Anu Chawla, Jordan J Clark, Angela Cowell, Richard Eccles, Isabel Garcia-Domval, Matthew Gemmill, Alessandro Gerada, PFR Gilmore, Richard Gregory, Ximeng Han, Catherine Hartley, Margaret Hughes, Miran Iurtza-Gomara, James Johnson, L Liu, Jennifer Manson, Charlotte Nelson, Elaine O'Toole, Cassie Orlateli, Rebekah Penrice-Handel, Lucille Randolph, N P Randle, Trevor Ian Robinson, Parul Sharma, Ghada T Shawli, James P Stewart, Neil Swainson, Ecaterina Varnos, Joanne Watts, Mark Whitehead |
| EPI_ISL_705403  | Liverpool Clinical Laboratories                                                                                                                                | COVID-19 Genomics UK (COG-UK) Consortium | Ana da Silva Filipe, Nalasha Johnson, Kathy Snodlett, Daniel Mair, Stephen Carmichael, Alice Boos, Lily Tong, Janna Nichols, Kyriaki Nomioku, Sarah McDonald, Richard Orton, Joseph Hughes, Steven Valtipally, David L Robertson, Alasdair MacLellan, Rory Gurnson, Sharif Shaaban, Matthew Holden, Rachel Baccow, Guy Mollett, Kathy U, James Shepherd, Antonia Ho, Emma Thomson                                                                                                                                                                                                                                                                                                       |
| EPI_ISL_705407  | Liverpool Clinical Laboratories                                                                                                                                | COVID-19 Genomics UK (COG-UK) Consortium | Sam Haddenby, Anita Luczad, Steve Paterson, Julian Hiscox, Alistair Darty, M Aimsaud, A Alvezahli, Muhammad Alruwaili, Stuart D Armstrong, Jones Benjamin, Eleanor G Bentley, Anu Chawla, Jordan J Clark, Angela Cowell, Richard Eccles, Isabel Garcia-Domval, Matthew Gemmill, Alessandro Gerada, PFR Gilmore, Richard Gregory, Ximeng Han, Catherine Hartley, Margaret Hughes, Miran Iurtza-Gomara, James Johnson, L Liu, Jennifer Manson, Charlotte Nelson, Elaine O'Toole, Cassie Orlateli, Rebekah Penrice-Handel, Lucille Randolph, N P Randle, Trevor Ian Robinson, Parul Sharma, Ghada T Shawli, James P Stewart, Neil Swainson, Ecaterina Varnos, Joanne Watts, Mark Whitehead |
| EPI_ISL_705409  | Liverpool Clinical Laboratories                                                                                                                                | COVID-19 Genomics UK (COG-UK) Consortium | Ana da Silva Filipe, Nalasha Johnson, Kathy Snodlett, Daniel Mair, Stephen Carmichael, Alice Boos, Lily Tong, Janna Nichols, Kyriaki Nomioku, Sarah McDonald, Richard Orton, Joseph Hughes, Steven Valtipally, David L Robertson, Alasdair MacLellan, Rory Gurnson, Sharif Shaaban, Matthew Holden, Rachel Baccow, Guy Mollett, Kathy U, James Shepherd, Antonia Ho, Emma Thomson                                                                                                                                                                                                                                                                                                       |
| EPI_ISL_705411  | Liverpool Clinical Laboratories                                                                                                                                | COVID-19 Genomics UK (COG-UK) Consortium | Sam Haddenby, Anita Luczad, Steve Paterson, Julian Hiscox, Alistair Darty, M Aimsaud, A Alvezahli, Muhammad Alruwaili, Stuart D Armstrong, Jones Benjamin, Eleanor G Bentley, Anu Chawla, Jordan J Clark, Angela Cowell, Richard Eccles, Isabel Garcia-Domval, Matthew Gemmill, Alessandro Gerada, PFR Gilmore, Richard Gregory, Ximeng Han, Catherine Hartley, Margaret Hughes, Miran Iurtza-Gomara, James Johnson, L Liu, Jennifer Manson, Charlotte Nelson, Elaine O'Toole, Cassie Orlateli, Rebekah Penrice-Handel, Lucille Randolph, N P Randle, Trevor Ian Robinson, Parul Sharma, Ghada T Shawli, James P Stewart, Neil Swainson, Ecaterina Varnos, Joanne Watts, Mark Whitehead |
| EPI_ISL_705423  | Liverpool Clinical Laboratories                                                                                                                                | COVID-19 Genomics UK (COG-UK) Consortium | Ana da Silva Filipe, Nalasha Johnson, Kathy Snodlett, Daniel Mair, Stephen Carmichael, Alice Boos, Lily Tong, Janna Nichols, Kyriaki Nomioku, Sarah McDonald, Richard Orton, Joseph Hughes, Steven Valtipally, David L Robertson, Alasdair MacLellan, Rory Gurnson, Sharif Shaaban, Matthew Holden, Rachel Baccow, Guy Mollett, Kathy U, James Shepherd, Antonia Ho, Emma Thomson                                                                                                                                                                                                                                                                                                       |
| EPI_ISL_705415  | Department of Pathology, University of Cambridge                                                                                                               | COVID-19 Genomics UK (COG-UK) Consortium | Tanya Golubchik, David Bonnal, George MacIntyre, Any Tebes, Mariateresa de Cesare, Caitin Moore, Alex Mobbs, Alex Justica, Robert Shaw, Monique Andersson, Timothy Peio, Emma Wise, Nathan Moore, Jessica Lynn, Nick Cortes, Malilde Mori, Stephen Kidd, David Black, John Todd, Christophe Fraser                                                                                                                                                                                                                                                                                                                                                                                      |
| EPI_ISL_705417  | Department of Pathology, University of Cambridge                                                                                                               | COVID-19 Genomics UK (COG-UK) Consortium | Tanya Golubchik, David Bonnal, George MacIntyre, Any Tebes, Mariateresa de Cesare, Caitin Moore, Alex Mobbs, Alex Justica, Robert Shaw, Monique Andersson, Timothy Peio, Emma Wise, Nathan Moore, Jessica Lynn, Nick Cortes, Malilde Mori, Stephen Kidd, David Black, John Todd, Christophe Fraser                                                                                                                                                                                                                                                                                                                                                                                      |
| EPI_ISL_705424  | Liverpool Clinical Laboratories                                                                                                                                | COVID-19 Genomics UK (COG-UK) Consortium | Tanya Golubchik, David Bonnal, George MacIntyre, Any Tebes, Mariateresa de Cesare, Caitin Moore, Alex Mobbs, Alex Justica, Robert Shaw, Monique Andersson, Timothy Peio, Emma Wise, Nathan Moore, Jessica Lynn, Nick Cortes, Malilde Mori, Stephen Kidd, David Black, John Todd, Christophe Fraser                                                                                                                                                                                                                                                                                                                                                                                      |
| EPI_ISL_7054470 | Oxford Virotics, NDM, University of Oxford, Oxford University Hospitals, Basingstoke and North Hampshire Hospital                                              | COVID-19 Genomics UK (COG-UK) Consortium | Tanya Golubchik, David Bonnal, George MacIntyre, Any Tebes, Mariateresa de Cesare, Caitin Moore, Alex Mobbs, Alex Justica, Robert Shaw, Monique Andersson, Timothy Peio, Emma Wise, Nathan Moore, Jessica Lynn, Nick Cortes, Malilde Mori, Stephen Kidd, David Black, John Todd, Christophe Fraser                                                                                                                                                                                                                                                                                                                                                                                      |
| EPI_ISL_705486  | Northumbria University / South Tees Hospitals NHS Foundation Trust / North Tees and Hartlepool NHS Foundation Trust / Newcastle Hospitals NHS Foundation Trust | COVID-19 Genomics UK (COG-UK) Consortium | Darren L Smith, Andrew Nelson, Matthew Bastion, Greg R Young, Joshua Loh, John Allan, Mohammad A Tariq, Giles S Holt, Gary Black, Wen C Yew, Lynn Dover, Paul Baker, Steve Liggett, Sarah Essex, Jane Greenaway, Debra Padgett, Olive Graham, Garen Scott, Edward Barton, Emma Swindells, Brendan Payne, Jennifer Collins, Yvstl Taha, Gary Eltringham                                                                                                                                                                                                                                                                                                                                  |
| EPI_ISL_705488  | Wales Specialist Virology Centre Sequencing Lab: Pathogen Genomics Unit                                                                                        | COVID-19 Genomics UK (COG-UK) Consortium | Catherine Moore, Jonathan Evans, Laura Gifford, Malorie Parry, Simon Cottrell, Angela Marchbank, Alec Birchley, Alexander Adams, Amy Gashin, Brie Gatica-Wilcox, Jason Coombes, Joel Southgate, Lauren Gilbert, Lee Graham, Nicola Paschiarini, Sara Kunzanos-Summerhayes, Sarah Taylor, Sophie Jones, Sara Ray, Matthew Bull, Joanne Watkins, Sally Corden, Tom Connor                                                                                                                                                                                                                                                                                                                 |
| EPI_ISL_705490  | West of Scotland Specialist Virology Centre, NHSGCG / MRC-University of Glasgow Centre for Virus Research                                                      | COVID-19 Genomics UK (COG-UK) Consortium | Ana da Silva Filipe, Nalasha Johnson, Kathy Snodlett, Daniel Mair, Stephen Carmichael, Alice Boos, Lily Tong, Janna Nichols, Kyriaki Nomioku, Sarah McDonald, Richard Orton, Joseph Hughes, Steven Valtipally, David L Robertson, Alasdair MacLellan, Rory Gurnson, Sharif Shaaban, Matthew Holden, Rachel Baccow, Guy Mollett, Kathy U, James Shepherd, Antonia Ho, Emma Thomson                                                                                                                                                                                                                                                                                                       |
| EPI_ISL_705498  | Oxford Virotics, NDM, University of Oxford, Oxford University Hospitals, Basingstoke and North Hampshire Hospital                                              | COVID-19 Genomics UK (COG-UK) Consortium | Tanya Golubchik, David Bonnal, George MacIntyre, Any Tebes, Mariateresa de Cesare, Caitin Moore, Alex Mobbs, Alex Justica, Robert Shaw, Monique Andersson, Timothy Peio, Emma Wise, Nathan Moore, Jessica Lynn, Nick Cortes, Malilde Mori, Stephen Kidd, David Black, John Todd, Christophe Fraser                                                                                                                                                                                                                                                                                                                                                                                      |
| EPI_ISL_705528  | West of Scotland Specialist Virology Centre, NHSGCG / MRC-University of Glasgow Centre for Virus Research                                                      | COVID-19 Genomics UK (COG-UK) Consortium | Ana da Silva Filipe, Nalasha Johnson, Kathy Snodlett, Daniel Mair, Stephen Carmichael, Alice Boos, Lily Tong, Janna Nichols, Kyriaki Nomioku, Sarah McDonald, Richard Orton, Joseph Hughes, Steven Valtipally, David L Robertson, Alasdair MacLellan, Rory Gurnson, Sharif Shaaban, Matthew Holden, Rachel Baccow, Guy Mollett, Kathy U, James Shepherd, Antonia Ho, Emma Thomson                                                                                                                                                                                                                                                                                                       |
| EPI_ISL_705529  | see above                                                                                                                                                      | COVID-19 Genomics UK (COG-UK) Consortium | Aminu S. Jahnu, Yasmin Chaudhry, Grant Hall, Iliana Georgiana, Myra Hosnillo, Martin D Curran, Malte Prickett, Surendra Parmar, Ian Goodfellow                                                                                                                                                                                                                                                                                                                                                                                                                                                                                                                                          |
| EPI_ISL_705573  | see above                                                                                                                                                      | COVID-19 Genomics UK (COG-UK) Consortium | Aminu S. Jahnu, Yasmin Chaudhry, Grant Hall, Iliana Georgiana, Myra Hosnillo, Martin D Curran, Malte Prickett, Surendra Parmar, Ian Goodfellow                                                                                                                                                                                                                                                                                                                                                                                                                                                                                                                                          |
| EPI_ISL_705576  | see above                                                                                                                                                      | COVID-19 Genomics UK (COG-UK) Consortium | Aminu S. Jahnu, Yasmin Chaudhry, Grant Hall, Iliana Georgiana, Myra Hosnillo, Martin D Curran, Malte Prickett, Surendra Parmar, Ian Goodfellow                                                                                                                                                                                                                                                                                                                                                                                                                                                                                                                                          |
| EPI_ISL_705578  | see above                                                                                                                                                      | COVID-19 Genomics UK (COG-UK) Consortium | Aminu S. Jahnu, Yasmin Chaudhry, Grant Hall, Iliana Georgiana, Myra Hosnillo, Martin D Curran, Malte Prickett, Surendra Parmar, Ian Goodfellow                                                                                                                                                                                                                                                                                                                                                                                                                                                                                                                                          |
| EPI_ISL_705612  | see above                                                                                                                                                      | COVID-19 Genomics UK (COG-UK) Consortium | Aminu S. Jahnu, Yasmin Chaudhry, Grant Hall, Iliana Georgiana, Myra Hosnillo, Martin D Curran, Malte Prickett, Surendra Parmar, Ian Goodfellow                                                                                                                                                                                                                                                                                                                                                                                                                                                                                                                                          |
| EPI_ISL_705620  | see above                                                                                                                                                      | COVID-19 Genomics UK (COG-UK) Consortium | Aminu S. Jahnu, Yasmin Chaudhry, Grant Hall, Iliana Georgiana, Myra Hosnillo, Martin D Curran, Malte Prickett, Surendra Parmar, Ian Goodfellow                                                                                                                                                                                                                                                                                                                                                                                                                                                                                                                                          |
| EPI_ISL_705622  | see above                                                                                                                                                      | COVID-19 Genomics UK (COG-UK) Consortium | Aminu S. Jahnu, Yasmin Chaudhry, Grant Hall, Iliana Georgiana, Myra Hosnillo, Martin D Curran, Malte Prickett, Surendra Parmar, Ian Goodfellow                                                                                                                                                                                                                                                                                                                                                                                                                                                                                                                                          |
| EPI_ISL_705623  | see above                                                                                                                                                      | COVID-19 Genomics UK (COG-UK) Consortium | Aminu S. Jahnu, Yasmin Chaudhry, Grant Hall, Iliana Georgiana, Myra Hosnillo, Martin D Curran, Malte Prickett, Surendra Parmar, Ian Goodfellow                                                                                                                                                                                                                                                                                                                                                                                                                                                                                                                                          |
| EPI_ISL_705627  | see above                                                                                                                                                      | COVID-19 Genomics UK (COG-UK) Consortium | Aminu S. Jahnu, Yasmin Chaudhry, Grant Hall, Iliana Georgiana, Myra Hosnillo, Martin D Curran, Malte Prickett, Surendra Parmar, Ian Goodfellow                                                                                                                                                                                                                                                                                                                                                                                                                                                                                                                                          |
| EPI_ISL_705629  | see above                                                                                                                                                      | COVID-19 Genomics UK (COG-UK) Consortium | Aminu S. Jahnu, Yasmin Chaudhry, Grant Hall, Iliana Georgiana, Myra Hosnillo, Martin D Curran, Malte Prickett, Surendra Parmar, Ian Goodfellow                                                                                                                                                                                                                                                                                                                                                                                                                                                                                                                                          |
| EPI_ISL_705630  | see above                                                                                                                                                      | COVID-19 Genomics UK (COG-UK) Consortium | Aminu S. Jahnu, Yasmin Chaudhry, Grant Hall, Iliana Georgiana, Myra Hosnillo, Martin D Curran, Malte Prickett, Surendra Parmar, Ian Goodfellow                                                                                                                                                                                                                                                                                                                                                                                                                                                                                                                                          |
| EPI_ISL_705638  | see above                                                                                                                                                      | COVID-19 Genomics UK (COG-UK) Consortium | Aminu S. Jahnu, Yasmin Chaudhry, Grant Hall, Iliana Georgiana, Myra Hosnillo, Martin D Curran, Malte Prickett, Surendra Parmar, Ian Goodfellow                                                                                                                                                                                                                                                                                                                                                                                                                                                                                                                                          |
| EPI_ISL_705639  | see above                                                                                                                                                      | COVID-19 Genomics UK (COG-UK) Consortium | Aminu S. Jahnu, Yasmin Chaudhry, Grant Hall, Iliana Georgiana, Myra Hosnillo, Martin D Curran, Malte Prickett, Surendra Parmar, Ian Goodfellow                                                                                                                                                                                                                                                                                                                                                                                                                                                                                                                                          |
| EPI_ISL_705640  | see above                                                                                                                                                      | COVID-19 Genomics UK (COG-UK) Consortium | Aminu S. Jahnu, Yasmin Chaudhry, Grant Hall, Iliana Georgiana, Myra Hosnillo, Martin D Curran, Malte Prickett, Surendra Parmar, Ian Goodfellow                                                                                                                                                                                                                                                                                                                                                                                                                                                                                                                                          |
| EPI_ISL_705641  | see above                                                                                                                                                      | COVID-19 Genomics UK (COG-UK) Consortium | Aminu S. Jahnu, Yasmin Chaudhry, Grant Hall, Iliana Georgiana, Myra Hosnillo, Martin D Curran, Malte Prickett, Surendra Parmar, Ian Goodfellow                                                                                                                                                                                                                                                                                                                                                                                                                                                                                                                                          |
| EPI_ISL_705642  | see above                                                                                                                                                      | COVID-19 Genomics UK (COG-UK) Consortium | Aminu S. Jahnu, Yasmin Chaudhry, Grant Hall, Iliana Georgiana, Myra Hosnillo, Martin D Curran, Malte Prickett, Surendra Parmar, Ian Goodfellow                                                                                                                                                                                                                                                                                                                                                                                                                                                                                                                                          |
| EPI_ISL_705644  | see above                                                                                                                                                      | COVID-19 Genomics UK (COG-UK) Consortium | Aminu S. Jahnu, Yasmin Chaudhry, Grant Hall, Iliana Georgiana, Myra Hosnillo, Martin D Curran, Malte Prickett, Surendra Parmar, Ian Goodfellow                                                                                                                                                                                                                                                                                                                                                                                                                                                                                                                                          |
| EPI_ISL_705645  | see above                                                                                                                                                      | COVID-19 Genomics UK (COG-UK) Consortium | Aminu S. Jahnu, Yasmin Chaudhry, Grant Hall, Iliana Georgiana, Myra Hosnillo, Martin D Curran, Malte Prickett, Surendra Parmar, Ian Goodfellow                                                                                                                                                                                                                                                                                                                                                                                                                                                                                                                                          |
| EPI_ISL_705646  | see above                                                                                                                                                      | COVID-19 Genomics UK (COG-UK) Consortium | Aminu S. Jahnu, Yasmin Chaudhry, Grant Hall, Iliana Georgiana, Myra Hosnillo, Martin D Curran, Malte Prickett, Surendra Parmar, Ian Goodfellow                                                                                                                                                                                                                                                                                                                                                                                                                                                                                                                                          |
| EPI_ISL_705648  | see above                                                                                                                                                      | COVID-19 Genomics UK (COG-UK) Consortium | Aminu S. Jahnu, Yasmin Chaudhry, Grant Hall, Iliana Georgiana, Myra Hosnillo, Martin D Curran, Malte Prickett, Surendra Parmar, Ian Goodfellow                                                                                                                                                                                                                                                                                                                                                                                                                                                                                                                                          |
| EPI_ISL_705649  | see above                                                                                                                                                      | COVID-19 Genomics UK (COG-UK) Consortium | Aminu S. Jahnu, Yasmin Chaudhry, Grant Hall, Iliana Georgiana, Myra Hosnillo, Martin D Curran, Malte Prickett, Surendra Parmar, Ian Goodfellow                                                                                                                                                                                                                                                                                                                                                                                                                                                                                                                                          |
| EPI_ISL_705650  | see above                                                                                                                                                      | COVID-19 Genomics UK (COG-UK) Consortium | Aminu S. Jahnu, Yasmin Chaudhry, Grant Hall, Iliana Georgiana, Myra Hosnillo, Martin D Curran, Malte Prickett, Surendra Parmar, Ian Goodfellow                                                                                                                                                                                                                                                                                                                                                                                                                                                                                                                                          |
| EPI_ISL_705654  | see above                                                                                                                                                      | COVID-19 Genomics UK (COG-UK) Consortium | Aminu S. Jahnu, Yasmin Chaudhry, Grant Hall, Iliana Georgiana, Myra Hosnillo, Martin D Curran, Malte Prickett, Surendra Parmar, Ian Goodfellow                                                                                                                                                                                                                                                                                                                                                                                                                                                                                                                                          |
| EPI_ISL_705655  | see above                                                                                                                                                      | COVID-19 Genomics UK (COG-UK) Consortium | Aminu S. Jahnu, Yasmin Chaudhry, Grant Hall, Iliana Georgiana, Myra Hosnillo, Martin D Curran, Malte Prickett, Surendra Parmar, Ian Goodfellow                                                                                                                                                                                                                                                                                                                                                                                                                                                                                                                                          |
| EPI_ISL_705657  | see above                                                                                                                                                      | COVID-19 Genomics UK (COG-UK) Consortium | Aminu S. Jahnu, Yasmin Chaudhry, Grant Hall, Iliana Georgiana, Myra Hosnillo, Martin D Curran, Malte Prickett, Surendra Parmar, Ian Goodfellow                                                                                                                                                                                                                                                                                                                                                                                                                                                                                                                                          |
| EPI_ISL_705658  | see above                                                                                                                                                      | COVID-19 Genomics UK (COG-UK) Consortium | Aminu S. Jahnu, Yasmin Chaudhry, Grant Hall, Iliana Georgiana, Myra Hosnillo, Martin D Curran, Malte Prickett, Surendra Parmar, Ian Goodfellow                                                                                                                                                                                                                                                                                                                                                                                                                                                                                                                                          |
| EPI_ISL_705661  | see above                                                                                                                                                      | COVID-19 Genomics UK (COG-UK) Consortium | Aminu S. Jahnu, Yasmin Chaudhry, Grant Hall, Iliana Georgiana, Myra Hosnillo, Martin D Curran, Malte Prickett, Surendra Parmar, Ian Goodfellow                                                                                                                                                                                                                                                                                                                                                                                                                                                                                                                                          |
| EPI_ISL_705662  | see above                                                                                                                                                      | COVID-19 Genomics UK (COG-UK) Consortium | Aminu S. Jahnu, Yasmin Chaudhry, Grant Hall, Iliana Georgiana, Myra Hosnillo, Martin D Curran, Malte Prickett, Surendra Parmar, Ian Goodfellow                                                                                                                                                                                                                                                                                                                                                                                                                                                                                                                                          |
| EPI_ISL_705663  | see above                                                                                                                                                      | COVID-19 Genomics UK (COG-UK) Consortium | Aminu S. Jahnu, Yasmin Chaudhry, Grant Hall, Iliana Georgiana, Myra Hosnillo, Martin D Curran, Malte Prickett, Surendra Parmar, Ian Goodfellow                                                                                                                                                                                                                                                                                                                                                                                                                                                                                                                                          |















|                                                                                                                                                                                                                                                |                                                                                           |                                                                                                |                                                                                                                                                                                                                                                                                                                             |
|------------------------------------------------------------------------------------------------------------------------------------------------------------------------------------------------------------------------------------------------|-------------------------------------------------------------------------------------------|------------------------------------------------------------------------------------------------|-----------------------------------------------------------------------------------------------------------------------------------------------------------------------------------------------------------------------------------------------------------------------------------------------------------------------------|
| EP1_ISL_709813, EP1_ISL_709814                                                                                                                                                                                                                 | Lighthouse Lab in Cambridge                                                               | Wellcome Sanger Institute for the COVID-19 Genomics UK (COG-UK) Consortium                     | Rob Howes, The Lighthouse Lab in Cambridge and Alex Alderton, Roberto Amato, Sonia Goncalves, Ewan Harrison, David K. Jackson, Ian Johnston, Dominic Kwiatkowski, Cordelia Langford, John Sillitoe on behalf of the Wellcome Sanger Institute COVID-19 Surveillance Team                                                    |
| EP1_ISL_709818, EP1_ISL_709820                                                                                                                                                                                                                 | Lighthouse Lab in Glasgow                                                                 | Wellcome Sanger Institute for the COVID-19 Genomics UK (COG-UK) Consortium                     | Harper VanSteenhouse, Yurni Kasai, David Gray, Carol Clugston, Anna Dominiczak and Alex Alderton, Roberto Amato, Sonia Goncalves, Ewan Harrison, David K. Jackson, Ian Johnston, Dominic Kwiatkowski, Cordelia Langford, John Sillitoe on behalf of the Wellcome Sanger Institute COVID-19 Surveillance Team                |
| EP1_ISL_709824                                                                                                                                                                                                                                 | Lighthouse Lab in Milton Keynes                                                           | Wellcome Sanger Institute for the COVID-19 Genomics UK (COG-UK) Consortium                     | The Lighthouse Lab in Milton Keynes and Alex Alderton, Roberto Amato, Sonia Goncalves, Ewan Harrison, David K. Jackson, Ian Johnston, Dominic Kwiatkowski, Cordelia Langford, John Sillitoe on behalf of the Wellcome Sanger Institute COVID-19 Surveillance Team                                                           |
| EP1_ISL_709826                                                                                                                                                                                                                                 | Lighthouse Lab in Glasgow                                                                 | Wellcome Sanger Institute for the COVID-19 Genomics UK (COG-UK) Consortium                     | Harper VanSteenhouse, Yurni Kasai, David Gray, Carol Clugston, Anna Dominiczak and Alex Alderton, Roberto Amato, Sonia Goncalves, Ewan Harrison, David K. Jackson, Ian Johnston, Dominic Kwiatkowski, Cordelia Langford, John Sillitoe on behalf of the Wellcome Sanger Institute COVID-19 Surveillance Team                |
| EP1_ISL_709828, EP1_ISL_709830                                                                                                                                                                                                                 | Lighthouse Lab in Milton Keynes                                                           | Wellcome Sanger Institute for the COVID-19 Genomics UK (COG-UK) Consortium                     | The Lighthouse Lab in Milton Keynes and Alex Alderton, Roberto Amato, Sonia Goncalves, Ewan Harrison, David K. Jackson, Ian Johnston, Dominic Kwiatkowski, Cordelia Langford, John Sillitoe on behalf of the Wellcome Sanger Institute COVID-19 Surveillance Team                                                           |
| EP1_ISL_709840, EP1_ISL_709848, EP1_ISL_709849                                                                                                                                                                                                 | Lighthouse Lab in Glasgow                                                                 | Wellcome Sanger Institute for the COVID-19 Genomics UK (COG-UK) Consortium                     | Harper VanSteenhouse, Yurni Kasai, David Gray, Carol Clugston, Anna Dominiczak and Alex Alderton, Roberto Amato, Sonia Goncalves, Ewan Harrison, David K. Jackson, Ian Johnston, Dominic Kwiatkowski, Cordelia Langford, John Sillitoe on behalf of the Wellcome Sanger Institute COVID-19 Surveillance Team                |
| EP1_ISL_709850                                                                                                                                                                                                                                 | Lighthouse Lab in Cambridge                                                               | Wellcome Sanger Institute for the COVID-19 Genomics UK (COG-UK) Consortium                     | Rob Howes, The Lighthouse Lab in Cambridge and Alex Alderton, Roberto Amato, Sonia Goncalves, Ewan Harrison, David K. Jackson, Ian Johnston, Dominic Kwiatkowski, Cordelia Langford, John Sillitoe on behalf of the Wellcome Sanger Institute COVID-19 Surveillance Team                                                    |
| EP1_ISL_709851, EP1_ISL_709852, EP1_ISL_709853, EP1_ISL_709854, EP1_ISL_709855, EP1_ISL_709856                                                                                                                                                 | Lighthouse Lab in Glasgow                                                                 | Wellcome Sanger Institute for the COVID-19 Genomics UK (COG-UK) Consortium                     | Harper VanSteenhouse, Yurni Kasai, David Gray, Carol Clugston, Anna Dominiczak and Alex Alderton, Roberto Amato, Sonia Goncalves, Ewan Harrison, David K. Jackson, Ian Johnston, Dominic Kwiatkowski, Cordelia Langford, John Sillitoe on behalf of the Wellcome Sanger Institute COVID-19 Surveillance Team                |
| EP1_ISL_709859                                                                                                                                                                                                                                 | Lighthouse Lab in Cambridge                                                               | Wellcome Sanger Institute for the COVID-19 Genomics UK (COG-UK) Consortium                     | Rob Howes, The Lighthouse Lab in Cambridge and Alex Alderton, Roberto Amato, Sonia Goncalves, Ewan Harrison, David K. Jackson, Ian Johnston, Dominic Kwiatkowski, Cordelia Langford, John Sillitoe on behalf of the Wellcome Sanger Institute COVID-19 Surveillance Team                                                    |
| EP1_ISL_709861                                                                                                                                                                                                                                 | Lighthouse Lab in Glasgow                                                                 | Wellcome Sanger Institute for the COVID-19 Genomics UK (COG-UK) Consortium                     | Harper VanSteenhouse, Yurni Kasai, David Gray, Carol Clugston, Anna Dominiczak and Alex Alderton, Roberto Amato, Sonia Goncalves, Ewan Harrison, David K. Jackson, Ian Johnston, Dominic Kwiatkowski, Cordelia Langford, John Sillitoe on behalf of the Wellcome Sanger Institute COVID-19 Surveillance Team                |
| EP1_ISL_709869                                                                                                                                                                                                                                 | Lighthouse Lab in Cambridge                                                               | Wellcome Sanger Institute for the COVID-19 Genomics UK (COG-UK) Consortium                     | Rob Howes, The Lighthouse Lab in Cambridge and Alex Alderton, Roberto Amato, Sonia Goncalves, Ewan Harrison, David K. Jackson, Ian Johnston, Dominic Kwiatkowski, Cordelia Langford, John Sillitoe on behalf of the Wellcome Sanger Institute COVID-19 Surveillance Team                                                    |
| EP1_ISL_709871                                                                                                                                                                                                                                 | Lighthouse Lab in Milton Keynes                                                           | Wellcome Sanger Institute for the COVID-19 Genomics UK (COG-UK) Consortium                     | The Lighthouse Lab in Milton Keynes and Alex Alderton, Roberto Amato, Sonia Goncalves, Ewan Harrison, David K. Jackson, Ian Johnston, Dominic Kwiatkowski, Cordelia Langford, John Sillitoe on behalf of the Wellcome Sanger Institute COVID-19 Surveillance Team                                                           |
| EP1_ISL_709876                                                                                                                                                                                                                                 | Lighthouse Lab in Cambridge                                                               | Wellcome Sanger Institute for the COVID-19 Genomics UK (COG-UK) Consortium                     | Rob Howes, The Lighthouse Lab in Cambridge and Alex Alderton, Roberto Amato, Sonia Goncalves, Ewan Harrison, David K. Jackson, Ian Johnston, Dominic Kwiatkowski, Cordelia Langford, John Sillitoe on behalf of the Wellcome Sanger Institute COVID-19 Surveillance Team                                                    |
| EP1_ISL_709883, EP1_ISL_709885, EP1_ISL_709887, EP1_ISL_709888, EP1_ISL_709893, EP1_ISL_709906, EP1_ISL_709915, EP1_ISL_709924, EP1_ISL_709926, EP1_ISL_709933, EP1_ISL_709934, EP1_ISL_709935, EP1_ISL_709942, EP1_ISL_709944, EP1_ISL_709946 | Lighthouse Lab in Milton Keynes                                                           | Wellcome Sanger Institute for the COVID-19 Genomics UK (COG-UK) Consortium                     | The Lighthouse Lab in Milton Keynes and Alex Alderton, Roberto Amato, Sonia Goncalves, Ewan Harrison, David K. Jackson, Ian Johnston, Dominic Kwiatkowski, Cordelia Langford, John Sillitoe on behalf of the Wellcome Sanger Institute COVID-19 Surveillance Team                                                           |
| see above                                                                                                                                                                                                                                      | Lighthouse Lab in Milton Keynes                                                           | Wellcome Sanger Institute for the COVID-19 Genomics UK (COG-UK) Consortium                     | The Lighthouse Lab in Milton Keynes and Alex Alderton, Roberto Amato, Sonia Goncalves, Ewan Harrison, David K. Jackson, Ian Johnston, Dominic Kwiatkowski, Cordelia Langford, John Sillitoe on behalf of the Wellcome Sanger Institute COVID-19 Surveillance Team                                                           |
| EP1_ISL_709948, EP1_ISL_709950, EP1_ISL_709951, EP1_ISL_709952, EP1_ISL_709953, EP1_ISL_709954, EP1_ISL_709955, EP1_ISL_709956                                                                                                                 | Lighthouse Lab in Glasgow                                                                 | Wellcome Sanger Institute for the COVID-19 Genomics UK (COG-UK) Consortium                     | Harper VanSteenhouse, Yurni Kasai, David Gray, Carol Clugston, Anna Dominiczak and Alex Alderton, Roberto Amato, Sonia Goncalves, Ewan Harrison, David K. Jackson, Ian Johnston, Dominic Kwiatkowski, Cordelia Langford, John Sillitoe on behalf of the Wellcome Sanger Institute COVID-19 Surveillance Team                |
| EP1_ISL_709958                                                                                                                                                                                                                                 | Lighthouse Lab in Glasgow                                                                 | Wellcome Sanger Institute for the COVID-19 Genomics UK (COG-UK) Consortium                     | Harper VanSteenhouse, Yurni Kasai, David Gray, Carol Clugston, Anna Dominiczak and Alex Alderton, Roberto Amato, Sonia Goncalves, Ewan Harrison, David K. Jackson, Ian Johnston, Dominic Kwiatkowski, Cordelia Langford, John Sillitoe on behalf of the Wellcome Sanger Institute COVID-19 Surveillance Team                |
| EP1_ISL_710122                                                                                                                                                                                                                                 | South Eastern Area Laboratory Services (SEALS) Hospital, Gibraltar Health Authority       | Respiratory Virus Unit, National Infection Service, Public Health England                      | PHE Covid Sequencing Team, Dr Nicholas Cortes (Gibraltar), Charlotte Gilborn-Jones (Gibraltar)                                                                                                                                                                                                                              |
| EP1_ISL_710515, EP1_ISL_710524, EP1_ISL_710525, EP1_ISL_710526, EP1_ISL_710527, EP1_ISL_710530, EP1_ISL_710531                                                                                                                                 | Respiratory Virus Unit, National Infection Service, Public Health England                 | COVID-19 Genomics UK (COG-UK) Consortium                                                       | PHE Covid Sequencing Team                                                                                                                                                                                                                                                                                                   |
| EP1_ISL_710533                                                                                                                                                                                                                                 | Microbiology, Department of Pathology, St. Bernard's Hospital, Gibraltar Health Authority | Respiratory Virus Unit, National Infection Service, Public Health England                      | PHE Covid Sequencing Team, Dr Nicholas Cortes (Gibraltar), Charlotte Gilborn-Jones (Gibraltar)                                                                                                                                                                                                                              |
| EP1_ISL_710542                                                                                                                                                                                                                                 | National Institute for Infectious Diseases, INMI, "L. Spallanzani" IRCCS                  | National Institute for Infectious Diseases, INMI, "L. Spallanzani" IRCCS                       | C.E.M. Gruber, B. Bartolini, M. Rueca, F. Messina, E. Giombini, A. Di Caro, MR Capobianchi                                                                                                                                                                                                                                  |
| EP1_ISL_710543                                                                                                                                                                                                                                 | National Institute for Infectious Diseases, INMI, "L. Spallanzani" IRCCS                  | National Institute for Infectious Diseases, INMI, "L. Spallanzani" IRCCS                       | B. Bartolini, C.E.M. Gruber, M. Rueca, F. Messina, E. Giombini, MR Capobianchi, A. Di Caro                                                                                                                                                                                                                                  |
| EP1_ISL_710544                                                                                                                                                                                                                                 | National Institute for Infectious Diseases, INMI, "L. Spallanzani" IRCCS                  | National Institute for Infectious Diseases, INMI, "L. Spallanzani" IRCCS                       | M. Rueca, B. Bartolini, C.E.M. Gruber, F. Messina, E. Giombini, A. Di Caro, MR Capobianchi                                                                                                                                                                                                                                  |
| EP1_ISL_710545                                                                                                                                                                                                                                 | National Institute for Infectious Diseases, INMI, "L. Spallanzani" IRCCS                  | National Institute for Infectious Diseases, INMI, "L. Spallanzani" IRCCS                       | F. Messina, E. Giombini, M. Rueca, B. Bartolini, C.E.M. Gruber, MR Capobianchi, A. Di Caro                                                                                                                                                                                                                                  |
| EP1_ISL_710546                                                                                                                                                                                                                                 | National Institute for Infectious Diseases, INMI, "L. Spallanzani" IRCCS                  | National Institute for Infectious Diseases, INMI, "L. Spallanzani" IRCCS                       | E. Giombini, M. Rueca, B. Bartolini, C.E.M. Gruber, F. Messina, A. Di Caro, MR Capobianchi                                                                                                                                                                                                                                  |
| EP1_ISL_710575                                                                                                                                                                                                                                 | Hôpital Fatouma-Bourguiba de Monastir                                                     | Laboratoire des Procédés de Ciblage Moléculaire et Cellulaire-Centre de Biotechnologie de Stax | Soussi, A., Abdin, N., Ben Ayed, I., Gargouri, S., Abdelmouleh, F., Elaragouh, A., Smeil, I., Bensaid, M., Stambouli, N., Kharat, N., Ajili, F., Fk-berraghi, L., Mhalla, S., Chouroua, A., Gatlou, I., Nefli, A., Turki, M., Aouni, M., Hammami, A., Mastouri, M., Karay Hakim, H., Kamoun, S., Pebat, A. and Masmoudi, S. |
| EP1_ISL_710588                                                                                                                                                                                                                                 | Omlanken Grimmered                                                                        | The Public Health Agency of Sweden                                                             | Department of Microbiology, The Public Health Agency of Sweden                                                                                                                                                                                                                                                              |
| EP1_ISL_710591                                                                                                                                                                                                                                 | Namahan Fljalibacka VC                                                                    | The Public Health Agency of Sweden                                                             | Department of Microbiology, The Public Health Agency of Sweden                                                                                                                                                                                                                                                              |
| EP1_ISL_710610                                                                                                                                                                                                                                 | Ekorps Vardcentral                                                                        | The Public Health Agency of Sweden                                                             | Department of Microbiology, The Public Health Agency of Sweden                                                                                                                                                                                                                                                              |
| EP1_ISL_710617                                                                                                                                                                                                                                 | Lighthouse Lab in Akeley Park                                                             | Wellcome Sanger Institute for the COVID-19 Genomics UK (COG-UK) Consortium                     | Jacquelyn Wynn, Mairead Hyland, The Lighthouse Lab in Akeley Park and Alex Alderton, Roberto Amato, Sonia Goncalves, Ewan Harrison, David K. Jackson, Ian Johnston, Dominic Kwiatkowski, Cordelia Langford, John Sillitoe on behalf of the Wellcome Sanger Institute COVID-19 Surveillance Team                             |
| EP1_ISL_710621, EP1_ISL_710622                                                                                                                                                                                                                 | Lighthouse Lab in Glasgow                                                                 | Wellcome Sanger Institute for the COVID-19 Genomics UK (COG-UK) Consortium                     | Jacquelyn Wynn, Mairead Hyland, The Lighthouse Lab in Akeley Park and Alex Alderton, Roberto Amato, Sonia Goncalves, Ewan Harrison, David K. Jackson, Ian Johnston, Dominic Kwiatkowski, Cordelia Langford, John Sillitoe on behalf of the Wellcome Sanger Institute COVID-19 Surveillance Team                             |
| EP1_ISL_710628                                                                                                                                                                                                                                 | Lighthouse Lab in Akeley Park                                                             | Wellcome Sanger Institute for the COVID-19 Genomics UK (COG-UK) Consortium                     | Jacquelyn Wynn, Mairead Hyland, The Lighthouse Lab in Akeley Park and Alex Alderton, Roberto Amato, Sonia Goncalves, Ewan Harrison, David K. Jackson, Ian Johnston, Dominic Kwiatkowski, Cordelia Langford, John Sillitoe on behalf of the Wellcome Sanger Institute COVID-19 Surveillance Team                             |
| EP1_ISL_710630                                                                                                                                                                                                                                 | Lighthouse Lab in Glasgow                                                                 | Wellcome Sanger Institute for the COVID-19 Genomics UK (COG-UK) Consortium                     | Harper VanSteenhouse, Yurni Kasai, David Gray, Carol Clugston, Anna Dominiczak and Alex Alderton, Roberto Amato, Sonia Goncalves, Ewan Harrison, David K. Jackson, Ian Johnston, Dominic Kwiatkowski, Cordelia Langford, John Sillitoe on behalf of the Wellcome Sanger Institute COVID-19 Surveillance Team                |



|                                                                                                                                                                                                                                                                                                                                                                                                                                                                                                                                                                                                                                                                                                                                                                                                                                                                                                                                                                                |                                                                                                          |                                                                                               |                                                                                                                                                                                                                                                                                                                            |
|--------------------------------------------------------------------------------------------------------------------------------------------------------------------------------------------------------------------------------------------------------------------------------------------------------------------------------------------------------------------------------------------------------------------------------------------------------------------------------------------------------------------------------------------------------------------------------------------------------------------------------------------------------------------------------------------------------------------------------------------------------------------------------------------------------------------------------------------------------------------------------------------------------------------------------------------------------------------------------|----------------------------------------------------------------------------------------------------------|-----------------------------------------------------------------------------------------------|----------------------------------------------------------------------------------------------------------------------------------------------------------------------------------------------------------------------------------------------------------------------------------------------------------------------------|
| EPI_ISL_711009, EPI_ISL_711010, EPI_ISL_711011, EPI_ISL_711012, EPI_ISL_711013, EPI_ISL_711015, EPI_ISL_711017, EPI_ISL_711018, EPI_ISL_711021                                                                                                                                                                                                                                                                                                                                                                                                                                                                                                                                                                                                                                                                                                                                                                                                                                 | Lighthouse Lab in Alderley Park                                                                          | Wellcome Sanger Institute for the COVID-19 Genomics UK (COG-UK) Consortium                    | Jacquelyn Wynn, Mairead Hyland, The Lighthouse Lab in Alderley Park and Alex Alderton, Roberto Amato, Sonia Goncalves, Ewan Harrison, David K Jackson, Ian Johnston, Dominic Kwiatkowski, Cordelia Langford, John Sillito on behalf of the Wellcome Sanger Institute COVID-19 Surveillance Team                            |
| EPI_ISL_711023, EPI_ISL_711024                                                                                                                                                                                                                                                                                                                                                                                                                                                                                                                                                                                                                                                                                                                                                                                                                                                                                                                                                 | Lighthouse Lab in Cambridge                                                                              | Wellcome Sanger Institute for the COVID-19 Genomics UK (COG-UK) Consortium                    | Rob Howes, The Lighthouse Lab in Cambridge and Alex Alderton, Roberto Amato, Sonia Goncalves, Ewan Harrison, David K Jackson, Ian Johnston, Dominic Kwiatkowski, Cordelia Langford, John Sillito on behalf of the Wellcome Sanger Institute COVID-19 Surveillance Team                                                     |
| EPI_ISL_711028, EPI_ISL_711030, EPI_ISL_711031, EPI_ISL_711033, EPI_ISL_711034, EPI_ISL_711036, EPI_ISL_711037, EPI_ISL_711041, EPI_ISL_711042, EPI_ISL_711043, EPI_ISL_711046, EPI_ISL_711047                                                                                                                                                                                                                                                                                                                                                                                                                                                                                                                                                                                                                                                                                                                                                                                 | Lighthouse Lab in Alderley Park                                                                          | Wellcome Sanger Institute for the COVID-19 Genomics UK (COG-UK) Consortium                    | Jacquelyn Wynn, Mairead Hyland, The Lighthouse Lab in Alderley Park and Alex Alderton, Roberto Amato, Sonia Goncalves, Ewan Harrison, David K Jackson, Ian Johnston, Dominic Kwiatkowski, Cordelia Langford, John Sillito on behalf of the Wellcome Sanger Institute COVID-19 Surveillance Team                            |
| EPI_ISL_711049, EPI_ISL_711051, EPI_ISL_711052, EPI_ISL_711053                                                                                                                                                                                                                                                                                                                                                                                                                                                                                                                                                                                                                                                                                                                                                                                                                                                                                                                 | Lighthouse Lab in Glasgow                                                                                | Wellcome Sanger Institute for the COVID-19 Genomics UK (COG-UK) Consortium                    | Hajper VanSteenthoven, Yurri Kasal, David Gray, Carol Clugston, Anna Dominiczak and Alex Alderton, Roberto Amato, Sonia Goncalves, Ewan Harrison, David K Jackson, Ian Johnston, Dominic Kwiatkowski, Cordelia Langford, John Sillito on behalf of the Wellcome Sanger Institute COVID-19 Surveillance Team                |
| EPI_ISL_711057                                                                                                                                                                                                                                                                                                                                                                                                                                                                                                                                                                                                                                                                                                                                                                                                                                                                                                                                                                 | Hopital Fatouma-Bourguiba de Monastir                                                                    | Laboratoire des Procédés de Ciblage Moléculaire et Cellulaire-Centre de Biochimologie de Stax | Soussi, A., Abd'N., Ben Ayed, I., Gargouri, S., Abdelmoulan, F., Elargoui, A., Smeil, I., Bensaid, M., Stambouli, N., Kharat, N., Ajili, F., Elk-berraghi, L., Mhalla, S., Chouroua, A., Ghaloul, I., Nabil, A., Turki, M., Aouni, M., Hammami, A., Mastouri, M., Karrey Hakim, H., Kamoun, S., Rebel, A. and Masmoudi, S. |
| EPI_ISL_711194, EPI_ISL_712195, EPI_ISL_714429, EPI_ISL_714477, EPI_ISL_711917, EPI_ISL_711594, EPI_ISL_711648, EPI_ISL_711661, EPI_ISL_711772, EPI_ISL_711852, EPI_ISL_711925, EPI_ISL_711933, EPI_ISL_711937, EPI_ISL_711979, EPI_ISL_712020                                                                                                                                                                                                                                                                                                                                                                                                                                                                                                                                                                                                                                                                                                                                 | Department of Virus and Microbiological Special Diagnostics, Statens Serum Institut, Copenhagen, Denmark | Albertsen Lab, Department of Chemistry and Bioscience, Aalborg University, Denmark            | Danish Covid-19 Genome Consortium                                                                                                                                                                                                                                                                                          |
| EPI_ISL_712067, EPI_ISL_712069                                                                                                                                                                                                                                                                                                                                                                                                                                                                                                                                                                                                                                                                                                                                                                                                                                                                                                                                                 | Laboratoire de Microbiologie-CHU Habib Bourguiba - Stax adresse                                          | Laboratoire des Procédés de Ciblage Moléculaire et Cellulaire-Centre de Biochimologie de Stax | Soussi, A., Abd'N., Ben Ayed, I., Gargouri, S., Abdelmoulan, F., Elargoui, A., Smeil, I., Bensaid, M., Stambouli, N., Kharat, N., Ajili, F., Elk-berraghi, L., Mhalla, S., Chouroua, A., Ghaloul, I., Nabil, A., Turki, M., Aouni, M., Hammami, A., Mastouri, M., Karrey Hakim, H., Kamoun, S., Rebel, A. and Masmoudi, S. |
| EPI_ISL_712116, EPI_ISL_712117, EPI_ISL_712224, EPI_ISL_712235, EPI_ISL_712238, EPI_ISL_712589, EPI_ISL_712641, EPI_ISL_712747, EPI_ISL_712749, EPI_ISL_712790, EPI_ISL_712824, EPI_ISL_712867, EPI_ISL_712893, EPI_ISL_712968, EPI_ISL_712974, EPI_ISL_712988, EPI_ISL_713007, EPI_ISL_713081, EPI_ISL_713298, EPI_ISL_713428, EPI_ISL_713565, EPI_ISL_713589, EPI_ISL_713594, EPI_ISL_713607, EPI_ISL_713665, EPI_ISL_713669, EPI_ISL_713698, EPI_ISL_713708, EPI_ISL_713729, EPI_ISL_713788, EPI_ISL_713802, EPI_ISL_713803, EPI_ISL_713934, EPI_ISL_713943, EPI_ISL_713967, EPI_ISL_714051, EPI_ISL_714065, EPI_ISL_714073, EPI_ISL_714105, EPI_ISL_714374, EPI_ISL_714376, EPI_ISL_714484, EPI_ISL_714500, EPI_ISL_714508, EPI_ISL_714523, EPI_ISL_714554, EPI_ISL_714596, EPI_ISL_714617, EPI_ISL_714632, EPI_ISL_714634, EPI_ISL_714635, EPI_ISL_714636, EPI_ISL_714671, EPI_ISL_714818, EPI_ISL_714831, EPI_ISL_714865, EPI_ISL_714889, EPI_ISL_714912, EPI_ISL_714925 | Department of Virus and Microbiological Special Diagnostics, Statens Serum Institut, Copenhagen, Denmark | Albertsen Lab, Department of Chemistry and Bioscience, Aalborg University, Denmark            |                                                                                                                                                                                                                                                                                                                            |
| EPI_ISL_717575                                                                                                                                                                                                                                                                                                                                                                                                                                                                                                                                                                                                                                                                                                                                                                                                                                                                                                                                                                 | Lab voor klinische biologie                                                                              | Onderzoeksgroep Virologie                                                                     | Laurens Lambrechts, Nick Vereecke, Marthe Pauwels, Bruno Vernasselt, Linos Vandekerckhove, Hans Nauwynck, Sebastiaan Theuns                                                                                                                                                                                                |
| EPI_ISL_717577                                                                                                                                                                                                                                                                                                                                                                                                                                                                                                                                                                                                                                                                                                                                                                                                                                                                                                                                                                 | Lab voor klinische biologie                                                                              | Onderzoeksgroep Virologie                                                                     | Nick Vereecke, Laurens Lambrechts, Marthe Pauwels, Bruno Vernasselt, Linos Vandekerckhove, Hans Nauwynck, Sebastiaan Theuns                                                                                                                                                                                                |
| EPI_ISL_717583, EPI_ISL_717584, EPI_ISL_717585                                                                                                                                                                                                                                                                                                                                                                                                                                                                                                                                                                                                                                                                                                                                                                                                                                                                                                                                 | Lab voor klinische biologie                                                                              | Onderzoeksgroep Virologie                                                                     | Laurens Lambrechts, Nick Vereecke, Marthe Pauwels, Bruno Vernasselt, Linos Vandekerckhove, Hans Nauwynck, Sebastiaan Theuns                                                                                                                                                                                                |
| EPI_ISL_717586, EPI_ISL_717592                                                                                                                                                                                                                                                                                                                                                                                                                                                                                                                                                                                                                                                                                                                                                                                                                                                                                                                                                 | Lab voor klinische biologie                                                                              | Onderzoeksgroep Virologie                                                                     | Nick Vereecke, Laurens Lambrechts, Marthe Pauwels, Bruno Vernasselt, Linos Vandekerckhove, Hans Nauwynck, Sebastiaan Theuns                                                                                                                                                                                                |
| EPI_ISL_717597                                                                                                                                                                                                                                                                                                                                                                                                                                                                                                                                                                                                                                                                                                                                                                                                                                                                                                                                                                 | Lab voor klinische biologie                                                                              | Onderzoeksgroep Virologie                                                                     | Nick Vereecke, Laurens Lambrechts, Marthe Pauwels, Bruno Vernasselt, Linos Vandekerckhove, Hans Nauwynck, Sebastiaan Theuns                                                                                                                                                                                                |
| EPI_ISL_717601                                                                                                                                                                                                                                                                                                                                                                                                                                                                                                                                                                                                                                                                                                                                                                                                                                                                                                                                                                 | Lab voor klinische biologie                                                                              | Onderzoeksgroep Virologie                                                                     | Laurens Lambrechts, Nick Vereecke, Marthe Pauwels, Bruno Vernasselt, Linos Vandekerckhove, Hans Nauwynck, Sebastiaan Theuns                                                                                                                                                                                                |
| EPI_ISL_717608                                                                                                                                                                                                                                                                                                                                                                                                                                                                                                                                                                                                                                                                                                                                                                                                                                                                                                                                                                 | Lab voor klinische biologie                                                                              | Onderzoeksgroep Virologie                                                                     | Nick Vereecke, Laurens Lambrechts, Marthe Pauwels, Bruno Vernasselt, Linos Vandekerckhove, Hans Nauwynck, Sebastiaan Theuns                                                                                                                                                                                                |
| EPI_ISL_717620, EPI_ISL_717621, EPI_ISL_717622                                                                                                                                                                                                                                                                                                                                                                                                                                                                                                                                                                                                                                                                                                                                                                                                                                                                                                                                 | Lab voor klinische biologie                                                                              | Onderzoeksgroep Virologie                                                                     | Nick Vereecke, Laurens Lambrechts, Marthe Pauwels, Bruno Vernasselt, Linos Vandekerckhove, Hans Nauwynck, Sebastiaan Theuns                                                                                                                                                                                                |
| EPI_ISL_717623, EPI_ISL_717624, EPI_ISL_717625                                                                                                                                                                                                                                                                                                                                                                                                                                                                                                                                                                                                                                                                                                                                                                                                                                                                                                                                 | Lab voor klinische biologie                                                                              | Onderzoeksgroep Virologie                                                                     | Laurens Lambrechts, Nick Vereecke, Marthe Pauwels, Bruno Vernasselt, Linos Vandekerckhove, Hans Nauwynck, Sebastiaan Theuns                                                                                                                                                                                                |
| EPI_ISL_717626, EPI_ISL_717627, EPI_ISL_717630                                                                                                                                                                                                                                                                                                                                                                                                                                                                                                                                                                                                                                                                                                                                                                                                                                                                                                                                 | Lab voor klinische biologie                                                                              | Onderzoeksgroep Virologie                                                                     | Nick Vereecke, Laurens Lambrechts, Marthe Pauwels, Bruno Vernasselt, Linos Vandekerckhove, Hans Nauwynck, Sebastiaan Theuns                                                                                                                                                                                                |
| EPI_ISL_717633                                                                                                                                                                                                                                                                                                                                                                                                                                                                                                                                                                                                                                                                                                                                                                                                                                                                                                                                                                 | Lab voor klinische biologie                                                                              | Onderzoeksgroep Virologie                                                                     | Laurens Lambrechts, Nick Vereecke, Marthe Pauwels, Bruno Vernasselt, Linos Vandekerckhove, Hans Nauwynck, Sebastiaan Theuns                                                                                                                                                                                                |
| EPI_ISL_717639                                                                                                                                                                                                                                                                                                                                                                                                                                                                                                                                                                                                                                                                                                                                                                                                                                                                                                                                                                 | Lab voor klinische biologie                                                                              | Onderzoeksgroep Virologie                                                                     | Nick Vereecke, Laurens Lambrechts, Marthe Pauwels, Bruno Vernasselt, Linos Vandekerckhove, Hans Nauwynck, Sebastiaan Theuns                                                                                                                                                                                                |
| EPI_ISL_717691                                                                                                                                                                                                                                                                                                                                                                                                                                                                                                                                                                                                                                                                                                                                                                                                                                                                                                                                                                 | Lab voor klinische biologie                                                                              | Onderzoeksgroep Virologie                                                                     | Laurens Lambrechts, Nick Vereecke, Marthe Pauwels, Bruno Vernasselt, Linos Vandekerckhove, Hans Nauwynck, Sebastiaan Theuns                                                                                                                                                                                                |
| EPI_ISL_717982                                                                                                                                                                                                                                                                                                                                                                                                                                                                                                                                                                                                                                                                                                                                                                                                                                                                                                                                                                 | Lab voor klinische biologie                                                                              | Onderzoeksgroep Virologie                                                                     | Nick Vereecke, Laurens Lambrechts, Marthe Pauwels, Bruno Vernasselt, Linos Vandekerckhove, Hans Nauwynck, Sebastiaan Theuns                                                                                                                                                                                                |
| EPI_ISL_717985                                                                                                                                                                                                                                                                                                                                                                                                                                                                                                                                                                                                                                                                                                                                                                                                                                                                                                                                                                 | Lab voor klinische biologie                                                                              | Onderzoeksgroep Virologie                                                                     | Laurens Lambrechts, Nick Vereecke, Marthe Pauwels, Bruno Vernasselt, Linos Vandekerckhove, Hans Nauwynck, Sebastiaan Theuns                                                                                                                                                                                                |
| EPI_ISL_717986, EPI_ISL_717987                                                                                                                                                                                                                                                                                                                                                                                                                                                                                                                                                                                                                                                                                                                                                                                                                                                                                                                                                 | Lab voor klinische biologie                                                                              | Onderzoeksgroep Virologie                                                                     | Nick Vereecke, Laurens Lambrechts, Marthe Pauwels, Bruno Vernasselt, Linos Vandekerckhove, Hans Nauwynck, Sebastiaan Theuns                                                                                                                                                                                                |
| EPI_ISL_717990, EPI_ISL_717992                                                                                                                                                                                                                                                                                                                                                                                                                                                                                                                                                                                                                                                                                                                                                                                                                                                                                                                                                 | Lab voor klinische biologie                                                                              | Onderzoeksgroep Virologie                                                                     | Laurens Lambrechts, Nick Vereecke, Marthe Pauwels, Bruno Vernasselt, Linos Vandekerckhove, Hans Nauwynck, Sebastiaan Theuns                                                                                                                                                                                                |
| EPI_ISL_718006, EPI_ISL_718007, EPI_ISL_718008                                                                                                                                                                                                                                                                                                                                                                                                                                                                                                                                                                                                                                                                                                                                                                                                                                                                                                                                 | Lab voor klinische biologie                                                                              | Onderzoeksgroep Virologie                                                                     | Nick Vereecke, Laurens Lambrechts, Marthe Pauwels, Bruno Vernasselt, Linos Vandekerckhove, Hans Nauwynck, Sebastiaan Theuns                                                                                                                                                                                                |
| EPI_ISL_718009, EPI_ISL_718010, EPI_ISL_718012, EPI_ISL_718013                                                                                                                                                                                                                                                                                                                                                                                                                                                                                                                                                                                                                                                                                                                                                                                                                                                                                                                 | Lab voor klinische biologie                                                                              | Onderzoeksgroep Virologie                                                                     | Laurens Lambrechts, Nick Vereecke, Marthe Pauwels, Bruno Vernasselt, Linos Vandekerckhove, Hans Nauwynck, Sebastiaan Theuns                                                                                                                                                                                                |
| EPI_ISL_718017, EPI_ISL_718018, EPI_ISL_718019, EPI_ISL_718020, EPI_ISL_718021, EPI_ISL_718022                                                                                                                                                                                                                                                                                                                                                                                                                                                                                                                                                                                                                                                                                                                                                                                                                                                                                 | Lab voor klinische biologie                                                                              | Onderzoeksgroep Virologie                                                                     | Nick Vereecke, Laurens Lambrechts, Marthe Pauwels, Bruno Vernasselt, Linos Vandekerckhove, Hans Nauwynck, Sebastiaan Theuns                                                                                                                                                                                                |
| EPI_ISL_718023, EPI_ISL_718024                                                                                                                                                                                                                                                                                                                                                                                                                                                                                                                                                                                                                                                                                                                                                                                                                                                                                                                                                 | Lab voor klinische biologie                                                                              | Onderzoeksgroep Virologie                                                                     | Laurens Lambrechts, Nick Vereecke, Marthe Pauwels, Bruno Vernasselt, Linos Vandekerckhove, Hans Nauwynck, Sebastiaan Theuns                                                                                                                                                                                                |
| EPI_ISL_718025, EPI_ISL_718026                                                                                                                                                                                                                                                                                                                                                                                                                                                                                                                                                                                                                                                                                                                                                                                                                                                                                                                                                 | Lab voor klinische biologie                                                                              | Onderzoeksgroep Virologie                                                                     | Nick Vereecke, Laurens Lambrechts, Marthe Pauwels, Bruno Vernasselt, Linos Vandekerckhove, Hans Nauwynck, Sebastiaan Theuns                                                                                                                                                                                                |
| EPI_ISL_718027, EPI_ISL_718093, EPI_ISL_718100                                                                                                                                                                                                                                                                                                                                                                                                                                                                                                                                                                                                                                                                                                                                                                                                                                                                                                                                 | Lab voor klinische biologie                                                                              | Onderzoeksgroep Virologie                                                                     | Laurens Lambrechts, Nick Vereecke, Marthe Pauwels, Bruno Vernasselt, Linos Vandekerckhove, Hans Nauwynck, Sebastiaan Theuns                                                                                                                                                                                                |
| EPI_ISL_718100                                                                                                                                                                                                                                                                                                                                                                                                                                                                                                                                                                                                                                                                                                                                                                                                                                                                                                                                                                 | Lab voor klinische biologie                                                                              | Onderzoeksgroep Virologie                                                                     | Nick Vereecke, Laurens Lambrechts, Marthe Pauwels, Bruno Vernasselt, Linos Vandekerckhove, Hans Nauwynck, Sebastiaan Theuns                                                                                                                                                                                                |
| EPI_ISL_718230, EPI_ISL_718236, EPI_ISL_718237, EPI_ISL_718242, EPI_ISL_718247                                                                                                                                                                                                                                                                                                                                                                                                                                                                                                                                                                                                                                                                                                                                                                                                                                                                                                 | ZOTZ KLIMAS MNZ Dusseldorf-Centrum GbH ÜBAG für Labormedizin, Genetik, Zytologie, Pathologie             | Center of Medical Microbiology, Virology, and Hospital Hygiene, University of Dusseldorf      | Maximilian Dammann, Alexander Diltrey, Ashley-Jane Duplessis, Patrick Frizzer, Katrin Hoffmann, Torsten Houwarat, Liesama Hilse, Malte Kohms Vasconcelos, Marek Korenec, Nadine Lübke, Jessica Nicolai, Klaus Pfeifer, Daniel Strawow, Jörg Timm, Andreas Walker, Tobias Wieremann, Rainer Zoz                             |
| EPI_ISL_718247                                                                                                                                                                                                                                                                                                                                                                                                                                                                                                                                                                                                                                                                                                                                                                                                                                                                                                                                                                 | Hospital                                                                                                 | National Reference Center for Viruses of Respiratory Infections, Institut Pasteur, Paris      | Marion Barret, Sylvie Bahilli, Méline Bizard, Angéla Brisebarre, Camille Capeli, Elienne Simon-Lafitte, Vincent Frouf, Maud Vanpenne, Sylvie van der Werf, Gisèle Lagathu                                                                                                                                                  |
| EPI_ISL_718262                                                                                                                                                                                                                                                                                                                                                                                                                                                                                                                                                                                                                                                                                                                                                                                                                                                                                                                                                                 | National Institute for Infectious Diseases, INMI, "L. Spallanzani" IRCCS                                 | National Institute for Infectious Diseases, INMI, "L. Spallanzani" IRCCS                      | C. E. M. Gruber, F. Messina, M. Ruoca, B. Bartolini, E. Giombini, MR Capobianchi, A. Di Caro                                                                                                                                                                                                                               |
| EPI_ISL_718265                                                                                                                                                                                                                                                                                                                                                                                                                                                                                                                                                                                                                                                                                                                                                                                                                                                                                                                                                                 | National Institute for Infectious Diseases, INMI, "L. Spallanzani" IRCCS                                 | National Institute for Infectious Diseases, INMI, "L. Spallanzani" IRCCS                      | B. Bartolini, M. Ruoca, C. E. M. Gruber, F. Messina, E. Giombini, A. Di Caro, MR Capobianchi                                                                                                                                                                                                                               |















|                                                                                                                                                                                                                                                                                                                                                                                                                                                                                                                                                                                                                                                                                                                                                                                                                                                                                                                                                                |                                                                                             |                                                                                         |                                                                                                                                                                                                                                                                                                                                                                                                                                                                                                                                  |
|----------------------------------------------------------------------------------------------------------------------------------------------------------------------------------------------------------------------------------------------------------------------------------------------------------------------------------------------------------------------------------------------------------------------------------------------------------------------------------------------------------------------------------------------------------------------------------------------------------------------------------------------------------------------------------------------------------------------------------------------------------------------------------------------------------------------------------------------------------------------------------------------------------------------------------------------------------------|---------------------------------------------------------------------------------------------|-----------------------------------------------------------------------------------------|----------------------------------------------------------------------------------------------------------------------------------------------------------------------------------------------------------------------------------------------------------------------------------------------------------------------------------------------------------------------------------------------------------------------------------------------------------------------------------------------------------------------------------|
| EPI_ISL_728305, EPI_ISL_728516<br>EPI_ISL_728524, EPI_ISL_728538<br>EPI_ISL_728551                                                                                                                                                                                                                                                                                                                                                                                                                                                                                                                                                                                                                                                                                                                                                                                                                                                                             | CNR Virus des Infections Respiratoires - France SUD                                         | CNR Virus des Infections Respiratoires - France SUD                                     | Antonin Bal, Gregory Destras, Claudia Gonzalez, Gwendolynne Burfin, Quentin Semanas, Martina Valetta, Bruno Uria, Laurence Jossel                                                                                                                                                                                                                                                                                                                                                                                                |
| EPI_ISL_728564, EPI_ISL_728588, EPI_ISL_728604, EPI_ISL_728626, EPI_ISL_728630, EPI_ISL_728643, EPI_ISL_728655, EPI_ISL_728663, EPI_ISL_728671, EPI_ISL_728674, EPI_ISL_728678, EPI_ISL_728679, EPI_ISL_728680, EPI_ISL_728681, EPI_ISL_728682, EPI_ISL_728683, EPI_ISL_728684, EPI_ISL_728685, EPI_ISL_728686, EPI_ISL_728687, EPI_ISL_728692, EPI_ISL_728698, EPI_ISL_728701, EPI_ISL_728703, EPI_ISL_728704, EPI_ISL_728705, EPI_ISL_728706, EPI_ISL_728707, EPI_ISL_728708, EPI_ISL_728709, EPI_ISL_728710, EPI_ISL_728711, EPI_ISL_728712, EPI_ISL_728713, EPI_ISL_728714, EPI_ISL_728715, EPI_ISL_728716, EPI_ISL_728717, EPI_ISL_728718, EPI_ISL_728719, EPI_ISL_728720, EPI_ISL_728721, EPI_ISL_728722, EPI_ISL_728723, EPI_ISL_728724, EPI_ISL_728725, EPI_ISL_728726, EPI_ISL_728727, EPI_ISL_728728, EPI_ISL_728729, EPI_ISL_728730, EPI_ISL_728731, EPI_ISL_728732, EPI_ISL_728733, EPI_ISL_728734, EPI_ISL_728735, EPI_ISL_728736, EPI_ISL_728737 | Dutch COVID-19 response team                                                                | National Institute for Public Health and the Environment (RIVM)                         | Adam Meijer, Harry Vermeers, Jeroen Cremer, Sharon van den Brink, Bas van der Veer, Annemarie van den Brandt, Florian Ziegenhaker, Dennis Schmitz, Charlii Reuskens, on behalf of the national COVID-19 response team                                                                                                                                                                                                                                                                                                            |
| EPI_ISL_728764, EPI_ISL_728765, EPI_ISL_728771, EPI_ISL_728782, EPI_ISL_728800, EPI_ISL_728802, EPI_ISL_728804, EPI_ISL_728805, EPI_ISL_728823, EPI_ISL_728826, EPI_ISL_728830, EPI_ISL_728834, EPI_ISL_728839                                                                                                                                                                                                                                                                                                                                                                                                                                                                                                                                                                                                                                                                                                                                                 | see above                                                                                   | Department of Biosystems Science and Engineering, ETH Zürich                            | Chaoran Chen, Sarah Nadeau, Catherine Aquino, Ivan Topolitsky, Pedro Ferreira, Philipp Jablonski, Susana Posada-Céspedes, Andrea Cabral de Gouveia, Maria Domenica Mocca, Simon Güter, Timothy Sykes, Lennart Opitz, Ralph Schlapbach, Christiane Beckmann, Maurice Fedotko, Olivier Kobel, Maria Domenica Mocca, Simon Güter, Timothy Sykes, Lennart Opitz, Ralph Schlapbach, Christiane Beckmann, Maurice Fedotko, Olivier Kobel, Christoph Noppen, Sophie Seidel, Noemie Santamaría de Souza, Niko Beerewinkel, Tanja Stadler |
| EPI_ISL_728833                                                                                                                                                                                                                                                                                                                                                                                                                                                                                                                                                                                                                                                                                                                                                                                                                                                                                                                                                 | see above                                                                                   | Department of Biosystems Science and Engineering, ETH Zürich                            | Chaoran Chen, Sarah Nadeau, Catherine Aquino, Ivan Topolitsky, Pedro Ferreira, Philipp Jablonski, Susana Posada-Céspedes, Andrea Cabral de Gouveia, Maria Domenica Mocca, Simon Güter, Timothy Sykes, Lennart Opitz, Ralph Schlapbach, Christiane Beckmann, Maurice Fedotko, Olivier Kobel, Christoph Noppen, Sophie Seidel, Noemie Santamaría de Souza, Niko Beerewinkel, Tanja Stadler                                                                                                                                         |
| EPI_ISL_729026, EPI_ISL_729080, EPI_ISL_729086, EPI_ISL_729087                                                                                                                                                                                                                                                                                                                                                                                                                                                                                                                                                                                                                                                                                                                                                                                                                                                                                                 | see above                                                                                   | Department of Biosystems Science and Engineering, ETH Zürich                            | Chaoran Chen, Sarah Nadeau, Catherine Aquino, Ivan Topolitsky, Pedro Ferreira, Philipp Jablonski, Susana Posada-Céspedes, Andrea Cabral de Gouveia, Maria Domenica Mocca, Simon Güter, Timothy Sykes, Lennart Opitz, Ralph Schlapbach, Christiane Beckmann, Maurice Fedotko, Olivier Kobel, Christoph Noppen, Sophie Seidel, Noemie Santamaría de Souza, Niko Beerewinkel, Tanja Stadler                                                                                                                                         |
| EPI_ISL_729098, EPI_ISL_729108, EPI_ISL_729109, EPI_ISL_729123, EPI_ISL_729146                                                                                                                                                                                                                                                                                                                                                                                                                                                                                                                                                                                                                                                                                                                                                                                                                                                                                 | see above                                                                                   | Department of Biosystems Science and Engineering, ETH Zürich                            | Chaoran Chen, Sarah Nadeau, Catherine Aquino, Ivan Topolitsky, Pedro Ferreira, Philipp Jablonski, Susana Posada-Céspedes, Andrea Cabral de Gouveia, Maria Domenica Mocca, Simon Güter, Timothy Sykes, Lennart Opitz, Ralph Schlapbach, Christiane Beckmann, Maurice Fedotko, Olivier Kobel, Christoph Noppen, Sophie Seidel, Noemie Santamaría de Souza, Niko Beerewinkel, Tanja Stadler                                                                                                                                         |
| EPI_ISL_729152, EPI_ISL_729153, EPI_ISL_729154, EPI_ISL_729156, EPI_ISL_729175, EPI_ISL_729182, EPI_ISL_729184, EPI_ISL_729187                                                                                                                                                                                                                                                                                                                                                                                                                                                                                                                                                                                                                                                                                                                                                                                                                                 | see above                                                                                   | Department of Biosystems Science and Engineering, ETH Zürich                            | Christian Beisel, Sarah Nadeau, Chaoran Chen, Ivan Topolitsky, Pedro Ferreira, Philipp Jablonski, Susana Posada-Céspedes, Tobias Schär, Ina Nissen, Natascia Santacroce, Elodie Bucklen, Christiane Beckmann, Maurice Fedotko, Olivier Kobel, Christoph Noppen, Sophie Seidel, Noemie Santamaría de Souza, Niko Beerewinkel, Tanja Stadler                                                                                                                                                                                       |
| EPI_ISL_729206, EPI_ISL_729212, EPI_ISL_729215, EPI_ISL_729231, EPI_ISL_729232, EPI_ISL_729234, EPI_ISL_729235, EPI_ISL_729236, EPI_ISL_729245, EPI_ISL_729248, EPI_ISL_729255                                                                                                                                                                                                                                                                                                                                                                                                                                                                                                                                                                                                                                                                                                                                                                                 | see above                                                                                   | Department of Biosystems Science and Engineering, ETH Zürich                            | Chaoran Chen, Sarah Nadeau, Catherine Aquino, Ivan Topolitsky, Pedro Ferreira, Philipp Jablonski, Susana Posada-Céspedes, Andrea Cabral de Gouveia, Maria Domenica Mocca, Simon Güter, Timothy Sykes, Lennart Opitz, Ralph Schlapbach, Christiane Beckmann, Maurice Fedotko, Olivier Kobel, Christoph Noppen, Sophie Seidel, Noemie Santamaría de Souza, Niko Beerewinkel, Tanja Stadler                                                                                                                                         |
| EPI_ISL_729345                                                                                                                                                                                                                                                                                                                                                                                                                                                                                                                                                                                                                                                                                                                                                                                                                                                                                                                                                 | A. Kumbholz, Labor Dr. Krause und Kollegen MVZ GmbH, Kiel                                   | Charité Universitätsmedizin Berlin, Institut für Virologie                              | Victor M Cornan, Barbara Mülhmann, Jörn Behnem-Schwarzbaach, Talitha Veith, Julia Schneider, Terry Jones, Christian Drost                                                                                                                                                                                                                                                                                                                                                                                                        |
| EPI_ISL_729348, EPI_ISL_729366, EPI_ISL_729368, EPI_ISL_729400, EPI_ISL_729410                                                                                                                                                                                                                                                                                                                                                                                                                                                                                                                                                                                                                                                                                                                                                                                                                                                                                 | Charité Universitätsmedizin Berlin, Institut für Virologie/Labor Berlin                     | Charité Universitätsmedizin Berlin, Institut für Virologie                              | Victor M Cornan, Barbara Mülhmann, Jörn Behnem-Schwarzbaach, Talitha Veith, Julia Schneider, Terry Jones, Christian Drost                                                                                                                                                                                                                                                                                                                                                                                                        |
| EPI_ISL_729467                                                                                                                                                                                                                                                                                                                                                                                                                                                                                                                                                                                                                                                                                                                                                                                                                                                                                                                                                 | A. Kumbholz, Labor Dr. Krause und Kollegen MVZ GmbH, Kiel                                   | Charité Universitätsmedizin Berlin, Institut für Virologie                              | Victor M Cornan, Barbara Mülhmann, Jörn Behnem-Schwarzbaach, Talitha Veith, Julia Schneider, Terry Jones, Christian Drost                                                                                                                                                                                                                                                                                                                                                                                                        |
| EPI_ISL_729588, EPI_ISL_729599, EPI_ISL_729603, EPI_ISL_729606                                                                                                                                                                                                                                                                                                                                                                                                                                                                                                                                                                                                                                                                                                                                                                                                                                                                                                 | Charité Universitätsmedizin Berlin, Institut für Virologie/Labor Berlin                     | Charité Universitätsmedizin Berlin, Institut für Virologie                              | Victor M Cornan, Barbara Mülhmann, Jörn Behnem-Schwarzbaach, Talitha Veith, Julia Schneider, Terry Jones, Christian Drost                                                                                                                                                                                                                                                                                                                                                                                                        |
| EPI_ISL_729612, EPI_ISL_729626, EPI_ISL_729694, EPI_ISL_729697, EPI_ISL_729698, EPI_ISL_729699, EPI_ISL_729699, EPI_ISL_729699, EPI_ISL_729699, EPI_ISL_729706, EPI_ISL_729712, EPI_ISL_729718, EPI_ISL_729721, EPI_ISL_729722, EPI_ISL_729733                                                                                                                                                                                                                                                                                                                                                                                                                                                                                                                                                                                                                                                                                                                 | A. Kumbholz, Labor Dr. Krause und Kollegen MVZ GmbH, Kiel                                   | Charité Universitätsmedizin Berlin, Institut für Virologie                              | Victor M Cornan, Barbara Mülhmann, Jörn Behnem-Schwarzbaach, Talitha Veith, Julia Schneider, Terry Jones, Christian Drost                                                                                                                                                                                                                                                                                                                                                                                                        |
| see above                                                                                                                                                                                                                                                                                                                                                                                                                                                                                                                                                                                                                                                                                                                                                                                                                                                                                                                                                      | Laboratorio de Referencia Nacional de Virus Respiratorios, Instituto Nacional de Salud Peru | Laboratorio de Genómica Microbiana, Universidad Peruana Cayetano Heredia                | Pablo Tsukayama, Alejandra Davila-Barclay, Luis González, Guillermo Salvañera, Pedro E. Romero, Brenda Ayzanoa, Janet Huancachoque, Pool Marcos, Marco Galazca, Priscila Lopez, Nancy Rojas                                                                                                                                                                                                                                                                                                                                      |
| EPI_ISL_729976                                                                                                                                                                                                                                                                                                                                                                                                                                                                                                                                                                                                                                                                                                                                                                                                                                                                                                                                                 | Laboratorio de Referencia Nacional de Virus Respiratorios, Instituto Nacional de Salud Peru | Laboratorio de Genómica Microbiana, Universidad Peruana Cayetano Heredia                | Pablo Tsukayama, Alejandra Davila-Barclay, Luis González, Guillermo Salvañera, Pedro E. Romero, Brenda Ayzanoa, Janet Huancachoque, Pool Marcos, Marco Galazca, Priscila Lopez, Nancy Rojas                                                                                                                                                                                                                                                                                                                                      |
| EPI_ISL_730621                                                                                                                                                                                                                                                                                                                                                                                                                                                                                                                                                                                                                                                                                                                                                                                                                                                                                                                                                 | Limmatlied Hospital                                                                         | Institute of Medical Virology, University of Zurich                                     | Stefan Schmutz, Verena Küfer, Maryam Zahedi, Gabriela Zillener, Jürg Bohni, Michael Huber, Alexandra Trkola                                                                                                                                                                                                                                                                                                                                                                                                                      |
| EPI_ISL_730626, EPI_ISL_730638                                                                                                                                                                                                                                                                                                                                                                                                                                                                                                                                                                                                                                                                                                                                                                                                                                                                                                                                 | Mannedorf Hospital                                                                          | Institute of Medical Virology, University of Zurich                                     | Stefan Schmutz, Verena Küfer, Maryam Zahedi, Gabriela Zillener, Jürg Bohni, Michael Huber, Alexandra Trkola                                                                                                                                                                                                                                                                                                                                                                                                                      |
| EPI_ISL_730648                                                                                                                                                                                                                                                                                                                                                                                                                                                                                                                                                                                                                                                                                                                                                                                                                                                                                                                                                 | CNR Virus des Infections Respiratoires - France SUD                                         | CNR Virus des Infections Respiratoires - France SUD                                     | Antoin Bal, Gregory Destras, Claudia Gonzalez, Gwendolynne Burfin, Quentin Semanas, Martina Valetta, Bruno Uria, Laurence Jossel                                                                                                                                                                                                                                                                                                                                                                                                 |
| EPI_ISL_730652                                                                                                                                                                                                                                                                                                                                                                                                                                                                                                                                                                                                                                                                                                                                                                                                                                                                                                                                                 | University of Bari, Valenzano, Italy                                                        | Dept. Food safety, Nutrition and Veterinary Public Health, Istituto superiore di sanità | N. Decaro, E. Lorusso, G. Eila, C. Desario, D. Buonavoglia, V. Martella, C. Buonavoglia, G. Vaccari, I. Di Bartolo, L. De Sabato, U. Agrimi                                                                                                                                                                                                                                                                                                                                                                                      |
| EPI_ISL_730653                                                                                                                                                                                                                                                                                                                                                                                                                                                                                                                                                                                                                                                                                                                                                                                                                                                                                                                                                 | University of Bari, Valenzano, Italy                                                        | Istituto Zooprofilattico Sperimentale dell'Abruzzo e del Molise G. Caporale             | N. Decaro, E. Lorusso, G. Eila, C. Desario, D. Buonavoglia, V. Martella, C. Buonavoglia, A. Lorusso, C. Caramà, V. Cuirini                                                                                                                                                                                                                                                                                                                                                                                                       |
| EPI_ISL_730655, EPI_ISL_730658                                                                                                                                                                                                                                                                                                                                                                                                                                                                                                                                                                                                                                                                                                                                                                                                                                                                                                                                 | Lighthouse Lab in Aderley Park                                                              | Wellcome Sanger Institute for the COVID-19 Genomics UK (COG-UK) Consortium              | Jacquelyn Wynn, Mairead Hyland, The Lighthouse Lab in Aderley Park and Alex Alderton, Roberto Amato, Sonia Gonçalves, Ewan Harrison, David K. Jackson, Ian Johnston, Dominic Kwiatkowski, Cordelia Langford, John Sillito on behalf of the Wellcome Sanger Institute COVID-19 Surveillance Team                                                                                                                                                                                                                                  |
| EPI_ISL_730659, EPI_ISL_730664                                                                                                                                                                                                                                                                                                                                                                                                                                                                                                                                                                                                                                                                                                                                                                                                                                                                                                                                 | Lighthouse Lab in Glasgow                                                                   | Wellcome Sanger Institute for the COVID-19 Genomics UK (COG-UK) Consortium              | Haiper VanSteenhouse, Yurni Kasai, David Gray, Carol Clugston, Anna Dominiczak and Alex Alderton, Roberto Amato, Sonia Gonçalves, Ewan Harrison, David K. Jackson, Ian Johnston, Dominic Kwiatkowski, Cordelia Langford, John Sillito on behalf of the Wellcome Sanger Institute COVID-19 Surveillance Team                                                                                                                                                                                                                      |
| EPI_ISL_730665, EPI_ISL_730672                                                                                                                                                                                                                                                                                                                                                                                                                                                                                                                                                                                                                                                                                                                                                                                                                                                                                                                                 | Lighthouse Lab in Aderley Park                                                              | Wellcome Sanger Institute for the COVID-19 Genomics UK (COG-UK) Consortium              | Jacquelyn Wynn, Mairead Hyland, The Lighthouse Lab in Aderley Park and Alex Alderton, Roberto Amato, Sonia Gonçalves, Ewan Harrison, David K. Jackson, Ian Johnston, Dominic Kwiatkowski, Cordelia Langford, John Sillito on behalf of the Wellcome Sanger Institute COVID-19 Surveillance Team                                                                                                                                                                                                                                  |
| EPI_ISL_730673, EPI_ISL_730675, EPI_ISL_730678                                                                                                                                                                                                                                                                                                                                                                                                                                                                                                                                                                                                                                                                                                                                                                                                                                                                                                                 | Lighthouse Lab in Glasgow                                                                   | Wellcome Sanger Institute for the COVID-19 Genomics UK (COG-UK) Consortium              | Haiper VanSteenhouse, Yurni Kasai, David Gray, Carol Clugston, Anna Dominiczak and Alex Alderton, Roberto Amato, Sonia Gonçalves, Ewan Harrison, David K. Jackson, Ian Johnston, Dominic Kwiatkowski, Cordelia Langford, John Sillito on behalf of the Wellcome Sanger Institute COVID-19 Surveillance Team                                                                                                                                                                                                                      |
| EPI_ISL_730682, EPI_ISL_730693, EPI_ISL_730697                                                                                                                                                                                                                                                                                                                                                                                                                                                                                                                                                                                                                                                                                                                                                                                                                                                                                                                 | Lighthouse Lab in Aderley Park                                                              | Wellcome Sanger Institute for the COVID-19 Genomics UK (COG-UK) Consortium              | Jacquelyn Wynn, Mairead Hyland, The Lighthouse Lab in Aderley Park and Alex Alderton, Roberto Amato, Sonia Gonçalves, Ewan Harrison, David K. Jackson, Ian Johnston, Dominic Kwiatkowski, Cordelia Langford, John Sillito on behalf of the Wellcome Sanger Institute COVID-19 Surveillance Team                                                                                                                                                                                                                                  |
| EPI_ISL_730700, EPI_ISL_730701                                                                                                                                                                                                                                                                                                                                                                                                                                                                                                                                                                                                                                                                                                                                                                                                                                                                                                                                 | Lighthouse Lab in Aderley Park                                                              | Wellcome Sanger Institute for the COVID-19 Genomics UK (COG-UK) Consortium              | Jacquelyn Wynn, Mairead Hyland, The Lighthouse Lab in Aderley Park and Alex Alderton, Roberto Amato, Sonia Gonçalves, Ewan Harrison, David K. Jackson, Ian Johnston, Dominic Kwiatkowski, Cordelia Langford, John Sillito on behalf of the Wellcome Sanger Institute COVID-19 Surveillance Team                                                                                                                                                                                                                                  |







|                                                                                                                                                                                                                                                                                                                                                                                                                                                                                                                                                                                                                                                                                                                                                                                                                                                                                                                                                                                                                                                                                                                                                                                                                                                                                                                                                                                                                                                                                                                                                                                                                                                                                                                                                                                                                                                |                                                                                                                                                                       |                                                                                                                                                                                                                                                                                                                                                                 |                                                                                                                                                                                                                                                                                                                    |  |  |  |  |  |  |
|------------------------------------------------------------------------------------------------------------------------------------------------------------------------------------------------------------------------------------------------------------------------------------------------------------------------------------------------------------------------------------------------------------------------------------------------------------------------------------------------------------------------------------------------------------------------------------------------------------------------------------------------------------------------------------------------------------------------------------------------------------------------------------------------------------------------------------------------------------------------------------------------------------------------------------------------------------------------------------------------------------------------------------------------------------------------------------------------------------------------------------------------------------------------------------------------------------------------------------------------------------------------------------------------------------------------------------------------------------------------------------------------------------------------------------------------------------------------------------------------------------------------------------------------------------------------------------------------------------------------------------------------------------------------------------------------------------------------------------------------------------------------------------------------------------------------------------------------|-----------------------------------------------------------------------------------------------------------------------------------------------------------------------|-----------------------------------------------------------------------------------------------------------------------------------------------------------------------------------------------------------------------------------------------------------------------------------------------------------------------------------------------------------------|--------------------------------------------------------------------------------------------------------------------------------------------------------------------------------------------------------------------------------------------------------------------------------------------------------------------|--|--|--|--|--|--|
| EPI_ISL_731532, EPI_ISL_731533                                                                                                                                                                                                                                                                                                                                                                                                                                                                                                                                                                                                                                                                                                                                                                                                                                                                                                                                                                                                                                                                                                                                                                                                                                                                                                                                                                                                                                                                                                                                                                                                                                                                                                                                                                                                                 |                                                                                                                                                                       |                                                                                                                                                                                                                                                                                                                                                                 |                                                                                                                                                                                                                                                                                                                    |  |  |  |  |  |  |
| EPI_ISL_731548                                                                                                                                                                                                                                                                                                                                                                                                                                                                                                                                                                                                                                                                                                                                                                                                                                                                                                                                                                                                                                                                                                                                                                                                                                                                                                                                                                                                                                                                                                                                                                                                                                                                                                                                                                                                                                 | Lighthouse Lab in Glasgow                                                                                                                                             | Wellcome Sanger Institute for the COVID-19 Genomics UK (COG-UK) Consortium                                                                                                                                                                                                                                                                                      | Harper VanSteenhouse, Yumi Kasai, David Gray, Carol Clugston, Anna Dominiczak and Alex Alderton, Roberto Amato, Sonia Goncalves, Ewan Harrison, David K. Jackson, Ian Johnston, Dominic Kwiatkowski, Cordelia Langford, John Sillcoe on behalf of the Wellcome Sanger Institute COVID-19 Surveillance Team         |  |  |  |  |  |  |
| EPI_ISL_731549                                                                                                                                                                                                                                                                                                                                                                                                                                                                                                                                                                                                                                                                                                                                                                                                                                                                                                                                                                                                                                                                                                                                                                                                                                                                                                                                                                                                                                                                                                                                                                                                                                                                                                                                                                                                                                 | Lighthouse Lab in Glasgow                                                                                                                                             | Wellcome Sanger Institute for the COVID-19 Genomics UK (COG-UK) Consortium                                                                                                                                                                                                                                                                                      | Jacquelyn Wynn, Mairead Hyland, The Lighthouse Lab in Aderley Park and Alex Alderton, Roberto Amato, Sonia Goncalves, Ewan Harrison, David K. Jackson, Ian Johnston, Dominic Kwiatkowski, Cordelia Langford, John Sillcoe on behalf of the Wellcome Sanger Institute COVID-19 Surveillance Team                    |  |  |  |  |  |  |
| EPI_ISL_731550                                                                                                                                                                                                                                                                                                                                                                                                                                                                                                                                                                                                                                                                                                                                                                                                                                                                                                                                                                                                                                                                                                                                                                                                                                                                                                                                                                                                                                                                                                                                                                                                                                                                                                                                                                                                                                 | Lighthouse Lab in Glasgow                                                                                                                                             | Wellcome Sanger Institute for the COVID-19 Genomics UK (COG-UK) Consortium                                                                                                                                                                                                                                                                                      | Harper VanSteenhouse, Yumi Kasai, David Gray, Carol Clugston, Anna Dominiczak and Alex Alderton, Roberto Amato, Sonia Goncalves, Ewan Harrison, David K. Jackson, Ian Johnston, Dominic Kwiatkowski, Cordelia Langford, John Sillcoe on behalf of the Wellcome Sanger Institute COVID-19 Surveillance Team         |  |  |  |  |  |  |
| EPI_ISL_731553, EPI_ISL_731554, EPI_ISL_731557, EPI_ISL_731558, EPI_ISL_731559, EPI_ISL_731561, EPI_ISL_731562, EPI_ISL_731564, EPI_ISL_731565, EPI_ISL_731566, EPI_ISL_731567, EPI_ISL_731568, EPI_ISL_731569, EPI_ISL_731610, EPI_ISL_731612, EPI_ISL_731613, EPI_ISL_731614, EPI_ISL_731619, EPI_ISL_731620, EPI_ISL_731622, EPI_ISL_731623, EPI_ISL_731630, EPI_ISL_731632, EPI_ISL_731633, EPI_ISL_731634, EPI_ISL_731636, EPI_ISL_731642, EPI_ISL_731644, EPI_ISL_731645, EPI_ISL_731646, EPI_ISL_731649, EPI_ISL_731652, EPI_ISL_731656, EPI_ISL_731657, EPI_ISL_731661, EPI_ISL_731663, EPI_ISL_731667, EPI_ISL_731671, EPI_ISL_731674, EPI_ISL_731675, EPI_ISL_731678, EPI_ISL_731679, EPI_ISL_731683, EPI_ISL_731684, EPI_ISL_731686, EPI_ISL_731692, EPI_ISL_731701, EPI_ISL_731702, EPI_ISL_731707, EPI_ISL_731709, EPI_ISL_731710, EPI_ISL_731714, EPI_ISL_731715, EPI_ISL_731717, EPI_ISL_731718, EPI_ISL_731720, EPI_ISL_731723, EPI_ISL_731728, EPI_ISL_731731, EPI_ISL_731740, EPI_ISL_731742, EPI_ISL_731743, EPI_ISL_731745, EPI_ISL_731746, EPI_ISL_731747, EPI_ISL_731748, EPI_ISL_731749, EPI_ISL_731755, EPI_ISL_731756, EPI_ISL_731760, EPI_ISL_731761, EPI_ISL_731762, EPI_ISL_731763, EPI_ISL_731770, EPI_ISL_731772, EPI_ISL_731777, EPI_ISL_731778, EPI_ISL_731782, EPI_ISL_731815, EPI_ISL_731816, EPI_ISL_731818, EPI_ISL_731825, EPI_ISL_731826, EPI_ISL_731828, EPI_ISL_731829, EPI_ISL_731833, EPI_ISL_731834, EPI_ISL_731837, EPI_ISL_731841, EPI_ISL_731845, EPI_ISL_731847, EPI_ISL_731848, EPI_ISL_731849, EPI_ISL_731851, EPI_ISL_731859, EPI_ISL_731859, EPI_ISL_731860, EPI_ISL_731861, EPI_ISL_731862, EPI_ISL_731864, EPI_ISL_731867, EPI_ISL_731868, EPI_ISL_731869, EPI_ISL_731871, EPI_ISL_731874, EPI_ISL_731876, EPI_ISL_731879, EPI_ISL_731881, EPI_ISL_731886, EPI_ISL_731889, EPI_ISL_731890 | Wellcome Sanger Institute for the COVID-19 Genomics UK (COG-UK) Consortium                                                                                            | Jacquelyn Wynn, Mairead Hyland, The Lighthouse Lab in Aderley Park and Alex Alderton, Roberto Amato, Sonia Goncalves, Ewan Harrison, David K. Jackson, Ian Johnston, Dominic Kwiatkowski, Cordelia Langford, John Sillcoe on behalf of the Wellcome Sanger Institute COVID-19 Surveillance Team                                                                 |                                                                                                                                                                                                                                                                                                                    |  |  |  |  |  |  |
| see above                                                                                                                                                                                                                                                                                                                                                                                                                                                                                                                                                                                                                                                                                                                                                                                                                                                                                                                                                                                                                                                                                                                                                                                                                                                                                                                                                                                                                                                                                                                                                                                                                                                                                                                                                                                                                                      | Lighthouse Lab in Aderley Park                                                                                                                                        | Wellcome Sanger Institute for the COVID-19 Genomics UK (COG-UK) Consortium                                                                                                                                                                                                                                                                                      |                                                                                                                                                                                                                                                                                                                    |  |  |  |  |  |  |
| EPI_ISL_731896, EPI_ISL_731902                                                                                                                                                                                                                                                                                                                                                                                                                                                                                                                                                                                                                                                                                                                                                                                                                                                                                                                                                                                                                                                                                                                                                                                                                                                                                                                                                                                                                                                                                                                                                                                                                                                                                                                                                                                                                 | Instituto Nacional de Saude (INSA) de Ciencia (IGC)                                                                                                                   | Instituto Nacional de Saude (INSA) de Ciencia (IGC)                                                                                                                                                                                                                                                                                                             | Borges et al                                                                                                                                                                                                                                                                                                       |  |  |  |  |  |  |
| EPI_ISL_731903                                                                                                                                                                                                                                                                                                                                                                                                                                                                                                                                                                                                                                                                                                                                                                                                                                                                                                                                                                                                                                                                                                                                                                                                                                                                                                                                                                                                                                                                                                                                                                                                                                                                                                                                                                                                                                 | Instituto Nacional de Saude (INSA) de Ciencia (IGC)                                                                                                                   | Instituto Nacional de Saude (INSA) de Ciencia (IGC)                                                                                                                                                                                                                                                                                                             | Borges et al                                                                                                                                                                                                                                                                                                       |  |  |  |  |  |  |
| EPI_ISL_731904, EPI_ISL_731911                                                                                                                                                                                                                                                                                                                                                                                                                                                                                                                                                                                                                                                                                                                                                                                                                                                                                                                                                                                                                                                                                                                                                                                                                                                                                                                                                                                                                                                                                                                                                                                                                                                                                                                                                                                                                 | Instituto Nacional de Saude (INSA) de Ciencia (IGC)                                                                                                                   | Instituto Nacional de Saude (INSA) de Ciencia (IGC)                                                                                                                                                                                                                                                                                                             | Borges et al                                                                                                                                                                                                                                                                                                       |  |  |  |  |  |  |
| EPI_ISL_731912, EPI_ISL_731915                                                                                                                                                                                                                                                                                                                                                                                                                                                                                                                                                                                                                                                                                                                                                                                                                                                                                                                                                                                                                                                                                                                                                                                                                                                                                                                                                                                                                                                                                                                                                                                                                                                                                                                                                                                                                 | Instituto Nacional de Saude (INSA) de Ciencia (IGC)                                                                                                                   | Instituto Nacional de Saude (INSA) de Ciencia (IGC)                                                                                                                                                                                                                                                                                                             | Borges et al                                                                                                                                                                                                                                                                                                       |  |  |  |  |  |  |
| EPI_ISL_731916, EPI_ISL_731918, EPI_ISL_731919, EPI_ISL_731920, EPI_ISL_731921, EPI_ISL_731922, EPI_ISL_731923                                                                                                                                                                                                                                                                                                                                                                                                                                                                                                                                                                                                                                                                                                                                                                                                                                                                                                                                                                                                                                                                                                                                                                                                                                                                                                                                                                                                                                                                                                                                                                                                                                                                                                                                 | Instituto Nacional de Saude (INSA)                                                                                                                                    | Instituto Nacional de Saude (INSA)                                                                                                                                                                                                                                                                                                                              | Borges et al                                                                                                                                                                                                                                                                                                       |  |  |  |  |  |  |
| EPI_ISL_731924, EPI_ISL_731925, EPI_ISL_731926, EPI_ISL_731927, EPI_ISL_731928, EPI_ISL_731929, EPI_ISL_731930                                                                                                                                                                                                                                                                                                                                                                                                                                                                                                                                                                                                                                                                                                                                                                                                                                                                                                                                                                                                                                                                                                                                                                                                                                                                                                                                                                                                                                                                                                                                                                                                                                                                                                                                 | Instituto Nacional de Saude (INSA) and Instituto Gulbenkian de Ciencia (IGC)                                                                                          | Instituto Nacional de Saude (INSA) de Ciencia (IGC)                                                                                                                                                                                                                                                                                                             | Borges et al                                                                                                                                                                                                                                                                                                       |  |  |  |  |  |  |
| EPI_ISL_731948, EPI_ISL_731959, EPI_ISL_731961, EPI_ISL_731964, EPI_ISL_731969, EPI_ISL_731993, EPI_ISL_732019, EPI_ISL_732031, EPI_ISL_732046, EPI_ISL_732055, EPI_ISL_732061, EPI_ISL_732117                                                                                                                                                                                                                                                                                                                                                                                                                                                                                                                                                                                                                                                                                                                                                                                                                                                                                                                                                                                                                                                                                                                                                                                                                                                                                                                                                                                                                                                                                                                                                                                                                                                 | Instituto Nacional de Saude (INSA)                                                                                                                                    | Instituto Nacional de Saude (INSA)                                                                                                                                                                                                                                                                                                                              | Borges et al                                                                                                                                                                                                                                                                                                       |  |  |  |  |  |  |
| see above                                                                                                                                                                                                                                                                                                                                                                                                                                                                                                                                                                                                                                                                                                                                                                                                                                                                                                                                                                                                                                                                                                                                                                                                                                                                                                                                                                                                                                                                                                                                                                                                                                                                                                                                                                                                                                      | Instituto Nacional de Saude (INSA)                                                                                                                                    | Instituto Nacional de Saude (INSA)                                                                                                                                                                                                                                                                                                                              | Borges et al                                                                                                                                                                                                                                                                                                       |  |  |  |  |  |  |
| EPI_ISL_732124, EPI_ISL_732197, EPI_ISL_732147, EPI_ISL_732151, EPI_ISL_732152, EPI_ISL_732154, EPI_ISL_732156, EPI_ISL_732157, EPI_ISL_732159, EPI_ISL_732160, EPI_ISL_732166, EPI_ISL_732170, EPI_ISL_732171, EPI_ISL_732174, EPI_ISL_732178, EPI_ISL_732218, EPI_ISL_732232, EPI_ISL_732240, EPI_ISL_732243, EPI_ISL_732244, EPI_ISL_732246, EPI_ISL_732249, EPI_ISL_732251, EPI_ISL_732253, EPI_ISL_732257, EPI_ISL_732265, EPI_ISL_732266, EPI_ISL_732284, EPI_ISL_732291                                                                                                                                                                                                                                                                                                                                                                                                                                                                                                                                                                                                                                                                                                                                                                                                                                                                                                                                                                                                                                                                                                                                                                                                                                                                                                                                                                 | Instituto Nacional de Saude (INSA) and Instituto Gulbenkian de Ciencia (IGC)                                                                                          | Instituto Nacional de Saude (INSA) de Ciencia (IGC)                                                                                                                                                                                                                                                                                                             | Borges et al                                                                                                                                                                                                                                                                                                       |  |  |  |  |  |  |
| see above                                                                                                                                                                                                                                                                                                                                                                                                                                                                                                                                                                                                                                                                                                                                                                                                                                                                                                                                                                                                                                                                                                                                                                                                                                                                                                                                                                                                                                                                                                                                                                                                                                                                                                                                                                                                                                      | Instituto Nacional de Saude (INSA) and Instituto Gulbenkian de Ciencia (IGC)                                                                                          | Instituto Nacional de Saude (INSA) de Ciencia (IGC)                                                                                                                                                                                                                                                                                                             | Borges et al                                                                                                                                                                                                                                                                                                       |  |  |  |  |  |  |
| EPI_ISL_732388, EPI_ISL_732407, EPI_ISL_732440, EPI_ISL_732457, EPI_ISL_732475, EPI_ISL_732484, EPI_ISL_732486, EPI_ISL_732495, EPI_ISL_732497, EPI_ISL_732498, EPI_ISL_732499, EPI_ISL_732500, EPI_ISL_732501                                                                                                                                                                                                                                                                                                                                                                                                                                                                                                                                                                                                                                                                                                                                                                                                                                                                                                                                                                                                                                                                                                                                                                                                                                                                                                                                                                                                                                                                                                                                                                                                                                 | National Virus Reference Laboratory de Ciencia (IGC)                                                                                                                  | National Virus Reference Laboratory de Ciencia (IGC)                                                                                                                                                                                                                                                                                                            | Michael Carr, Gabriel Gonzalez, Jonathan Dean, Daniel Hare, Cilian F De Gascon Department of Microbiology, The Public Health Agency of Sweden                                                                                                                                                                      |  |  |  |  |  |  |
| see above                                                                                                                                                                                                                                                                                                                                                                                                                                                                                                                                                                                                                                                                                                                                                                                                                                                                                                                                                                                                                                                                                                                                                                                                                                                                                                                                                                                                                                                                                                                                                                                                                                                                                                                                                                                                                                      | National Virus Reference Laboratory de Ciencia (IGC)                                                                                                                  | National Virus Reference Laboratory de Ciencia (IGC)                                                                                                                                                                                                                                                                                                            |                                                                                                                                                                                                                                                                                                                    |  |  |  |  |  |  |
| EPI_ISL_732678, EPI_ISL_732683, EPI_ISL_732687, EPI_ISL_732703                                                                                                                                                                                                                                                                                                                                                                                                                                                                                                                                                                                                                                                                                                                                                                                                                                                                                                                                                                                                                                                                                                                                                                                                                                                                                                                                                                                                                                                                                                                                                                                                                                                                                                                                                                                 | CNR Virus des Infections Respiratoires - France SUD                                                                                                                   | CNR Virus des Infections Respiratoires - France SUD                                                                                                                                                                                                                                                                                                             | Antonin Bal, Gregory Destras, Claudia Gonzalez, Gwendolynne Burlin, Querrin Semanas, Marine Valette, Bruno Uria, Laurence Jossel                                                                                                                                                                                   |  |  |  |  |  |  |
| EPI_ISL_732750, EPI_ISL_732751, EPI_ISL_732752, EPI_ISL_732753, EPI_ISL_732755, EPI_ISL_732756, EPI_ISL_732757, EPI_ISL_732760, EPI_ISL_732765, EPI_ISL_732767, EPI_ISL_732768, EPI_ISL_732770, EPI_ISL_732771, EPI_ISL_732772, EPI_ISL_732775, EPI_ISL_732776, EPI_ISL_732777, EPI_ISL_732778, EPI_ISL_732779, EPI_ISL_732780, EPI_ISL_732782, EPI_ISL_732783, EPI_ISL_732784, EPI_ISL_732785, EPI_ISL_732787, EPI_ISL_732789, EPI_ISL_732791, EPI_ISL_732793, EPI_ISL_732794, EPI_ISL_732795, EPI_ISL_732796, EPI_ISL_732801, EPI_ISL_732801, EPI_ISL_732802, EPI_ISL_732803, EPI_ISL_732804, EPI_ISL_732805, EPI_ISL_732806, EPI_ISL_732809, EPI_ISL_732810, EPI_ISL_732811, EPI_ISL_732812, EPI_ISL_732813, EPI_ISL_732814, EPI_ISL_732815, EPI_ISL_732816, EPI_ISL_732817, EPI_ISL_732818, EPI_ISL_732819                                                                                                                                                                                                                                                                                                                                                                                                                                                                                                                                                                                                                                                                                                                                                                                                                                                                                                                                                                                                                                 | CNR Virus des Infections Respiratoires - France SUD                                                                                                                   | Antonin Bal, Gregory Destras, Claudia Gonzalez, Gwendolynne Burlin, Querrin Semanas, Marine Valette, Bruno Uria, Laurence Jossel                                                                                                                                                                                                                                |                                                                                                                                                                                                                                                                                                                    |  |  |  |  |  |  |
| see above                                                                                                                                                                                                                                                                                                                                                                                                                                                                                                                                                                                                                                                                                                                                                                                                                                                                                                                                                                                                                                                                                                                                                                                                                                                                                                                                                                                                                                                                                                                                                                                                                                                                                                                                                                                                                                      | Centro de Investigacion Biomedica de La Rioja - Hospital San Pedro Logrono                                                                                            | SeqCOVID-SPAIN consortium/IBV(CSIC)                                                                                                                                                                                                                                                                                                                             | Maria de Toro, José Manuel Azcona Gutiérrez, Maria Pilar Bea Escudero, Miriam Blasco Alberdi and SeqCOVID-SPAIN consortium                                                                                                                                                                                         |  |  |  |  |  |  |
| EPI_ISL_732862, EPI_ISL_732863, EPI_ISL_732866, EPI_ISL_732868, EPI_ISL_732870, EPI_ISL_732881, EPI_ISL_732889, EPI_ISL_732891, EPI_ISL_732893, EPI_ISL_732894                                                                                                                                                                                                                                                                                                                                                                                                                                                                                                                                                                                                                                                                                                                                                                                                                                                                                                                                                                                                                                                                                                                                                                                                                                                                                                                                                                                                                                                                                                                                                                                                                                                                                 | genXone SA, Molecular Diagnostics Laboratory / NZOZ                                                                                                                   | genXone SA, Research & Development Laboratory                                                                                                                                                                                                                                                                                                                   | Maciej Szykalski, Grzegorz Nowicki, Monika Makowska-Wonak, Jakub Grabowski, Natalia Dzwiska-Maleska, Ukasz Krych, Michia Kaszuba                                                                                                                                                                                   |  |  |  |  |  |  |
| EPI_ISL_733499, EPI_ISL_733500                                                                                                                                                                                                                                                                                                                                                                                                                                                                                                                                                                                                                                                                                                                                                                                                                                                                                                                                                                                                                                                                                                                                                                                                                                                                                                                                                                                                                                                                                                                                                                                                                                                                                                                                                                                                                 | 1-Laboratory of Microbiology, National Reference Lab, Charles Nicolle Hospital, 2-University of Tunis ElManar, Faculty of Medicine of Tunis, LR995309, Tunis, Tunisia | 1-Clinical and Experimental Pharmacology Lab, LR16SP02, National Center of Pharmacovigilance, University of Tunis El Manar, Tunis, Tunisia, 2-Neurodegenerative diseases and psychiatric troubles, LR18SP03, Razi Hospital, University of Tunis El Manar, Tunis, Tunisia, 3- Ministry of Health, National Observatory of New and Emerging Diseases, 1006, Tunis | Ilhem Bouthe-Ben Boubaker, Sameh Traboulsi, Nissat Ben Aleya, Maher Kharrat, Ala Ben Kahla, Jallia Ben Khellil, Saima Abd, Sara Fejjani, Mouna Ben Sassi, Mouna Sifer, Guedd Ali Barreh, Habiba Ben Romdhane, Soussi Amra, Sara Chermann, Hanen El Jebari, Asma Fejjani, Gales Emma, Riadh Daghious, Riadh Gouider |  |  |  |  |  |  |
| see above                                                                                                                                                                                                                                                                                                                                                                                                                                                                                                                                                                                                                                                                                                                                                                                                                                                                                                                                                                                                                                                                                                                                                                                                                                                                                                                                                                                                                                                                                                                                                                                                                                                                                                                                                                                                                                      | see above                                                                                                                                                             | see above                                                                                                                                                                                                                                                                                                                                                       | see above                                                                                                                                                                                                                                                                                                          |  |  |  |  |  |  |
| EPI_ISL_733512, EPI_ISL_733575                                                                                                                                                                                                                                                                                                                                                                                                                                                                                                                                                                                                                                                                                                                                                                                                                                                                                                                                                                                                                                                                                                                                                                                                                                                                                                                                                                                                                                                                                                                                                                                                                                                                                                                                                                                                                 | Temporary Specimen Collection Centre                                                                                                                                  | Hong Kong Department of Health                                                                                                                                                                                                                                                                                                                                  | Alan K.L. Tsang, Peter C.W. Yip, Edman T.K. Lam, Rickjason C.W. Chan, Dominic N.C. Tsang                                                                                                                                                                                                                           |  |  |  |  |  |  |
| EPI_ISL_733581                                                                                                                                                                                                                                                                                                                                                                                                                                                                                                                                                                                                                                                                                                                                                                                                                                                                                                                                                                                                                                                                                                                                                                                                                                                                                                                                                                                                                                                                                                                                                                                                                                                                                                                                                                                                                                 | Respiratory Virus Unit, National Infection Service, Public Health England                                                                                             | COVID-19 Genomics UK (COG-UK) Consortium                                                                                                                                                                                                                                                                                                                        | PHE Covid Sequencing Team                                                                                                                                                                                                                                                                                          |  |  |  |  |  |  |
| EPI_ISL_733597                                                                                                                                                                                                                                                                                                                                                                                                                                                                                                                                                                                                                                                                                                                                                                                                                                                                                                                                                                                                                                                                                                                                                                                                                                                                                                                                                                                                                                                                                                                                                                                                                                                                                                                                                                                                                                 | Lighthouse Lab in Cambridge                                                                                                                                           | Wellcome Sanger Institute for the COVID-19 Genomics UK (COG-UK) Consortium                                                                                                                                                                                                                                                                                      | Rob Howes, The Lighthouse Lab in Cambridge and Alex Alderton, Roberto Amato, Sonia Goncalves, Ewan Harrison, David K. Jackson, Ian Johnston, Dominic Kwiatkowski, Cordelia Langford, John Sillcoe on behalf of the Wellcome Sanger Institute COVID-19 Surveillance Team                                            |  |  |  |  |  |  |
| EPI_ISL_733599                                                                                                                                                                                                                                                                                                                                                                                                                                                                                                                                                                                                                                                                                                                                                                                                                                                                                                                                                                                                                                                                                                                                                                                                                                                                                                                                                                                                                                                                                                                                                                                                                                                                                                                                                                                                                                 | Lighthouse Lab in Aderley Park                                                                                                                                        | Wellcome Sanger Institute for the COVID-19 Genomics UK (COG-UK) Consortium                                                                                                                                                                                                                                                                                      | Jacquelyn Wynn, Mairead Hyland, The Lighthouse Lab in Aderley Park and Alex Alderton, Roberto Amato, Sonia Goncalves, Ewan Harrison, David K. Jackson, Ian Johnston, Dominic Kwiatkowski, Cordelia Langford, John Sillcoe on behalf of the Wellcome Sanger Institute COVID-19 Surveillance Team                    |  |  |  |  |  |  |
| EPI_ISL_733607                                                                                                                                                                                                                                                                                                                                                                                                                                                                                                                                                                                                                                                                                                                                                                                                                                                                                                                                                                                                                                                                                                                                                                                                                                                                                                                                                                                                                                                                                                                                                                                                                                                                                                                                                                                                                                 | Lighthouse Lab in Milton Keynes                                                                                                                                       | Wellcome Sanger Institute for the COVID-19 Genomics UK (COG-UK) Consortium                                                                                                                                                                                                                                                                                      | The Lighthouse Lab in Milton Keynes and Alex Alderton, Roberto Amato, Sonia Goncalves, Ewan Harrison, David K. Jackson, Ian Johnston, Dominic Kwiatkowski, Cordelia Langford, John Sillcoe on behalf of the Wellcome Sanger Institute COVID-19 Surveillance Team                                                   |  |  |  |  |  |  |
| EPI_ISL_733509, EPI_ISL_733510, EPI_ISL_733511, EPI_ISL_733512, EPI_ISL_733518                                                                                                                                                                                                                                                                                                                                                                                                                                                                                                                                                                                                                                                                                                                                                                                                                                                                                                                                                                                                                                                                                                                                                                                                                                                                                                                                                                                                                                                                                                                                                                                                                                                                                                                                                                 | ZOTZ KLIMAS ANZ Dusseldorf-Centrum GbR ÜB&G für Labormedizin, Genetik, Zytologie, Pathologie                                                                          | Center of Medical Microbiology, Virology, and Hospital Hygiene, University of Dusseldorf                                                                                                                                                                                                                                                                        | Maximilian Damagnez, Alexander Diltney, Ashley-Jane Duplessis, Patrick Frizer, Karin Hoffmann, Torsten Houwarat, Usama Hilse, Malte Kohms Vasconcelos, Marek Korencak, Nadine Lubke, Jessica Nicolai, Klaus Pfeifer, Daniel Stralow, Jörg Timm, Andreas Wilker, Tobias Wieremann, Rainer Zoz                       |  |  |  |  |  |  |















|                                                                                                                                                                                                                                                                                                                                                                                                                                                                                                                                                                                                                                                                                                                                                                                                                |                                                                                                |                                                                                                                                                                                                                                                                                                                                                                                                                                                                            |                                                                                                                                                                                                                                                                                                                                                                                                                                                                            |
|----------------------------------------------------------------------------------------------------------------------------------------------------------------------------------------------------------------------------------------------------------------------------------------------------------------------------------------------------------------------------------------------------------------------------------------------------------------------------------------------------------------------------------------------------------------------------------------------------------------------------------------------------------------------------------------------------------------------------------------------------------------------------------------------------------------|------------------------------------------------------------------------------------------------|----------------------------------------------------------------------------------------------------------------------------------------------------------------------------------------------------------------------------------------------------------------------------------------------------------------------------------------------------------------------------------------------------------------------------------------------------------------------------|----------------------------------------------------------------------------------------------------------------------------------------------------------------------------------------------------------------------------------------------------------------------------------------------------------------------------------------------------------------------------------------------------------------------------------------------------------------------------|
| EP1_ISL_736703                                                                                                                                                                                                                                                                                                                                                                                                                                                                                                                                                                                                                                                                                                                                                                                                 | Lighthouse Lab in Milton Keynes                                                                | Wellcome Sanger Institute for the COVID-19 Genomics UK (COG-UK) Consortium                                                                                                                                                                                                                                                                                                                                                                                                 | The Lighthouse Lab in Milton Keynes and Alex Alderton, Roberto Amato, Sonia Goncalves, Ewan Harrison, David K. Jackson, Ian Johnston, Dominic Kwiatkowski, Cordelia Langford, John Sillitoe on behalf of the Wellcome Sanger Institute COVID-19 Surveillance Team                                                                                                                                                                                                          |
| EP1_ISL_736707, EP1_ISL_736708, EP1_ISL_736710, EP1_ISL_736715                                                                                                                                                                                                                                                                                                                                                                                                                                                                                                                                                                                                                                                                                                                                                 | Lighthouse Lab in Alderley Park                                                                | Wellcome Sanger Institute for the COVID-19 Genomics UK (COG-UK) Consortium                                                                                                                                                                                                                                                                                                                                                                                                 | Jacquelyn Wynn, Mairead Hyland, The Lighthouse Lab in Alderley Park and Alex Alderton, Roberto Amato, Sonia Goncalves, Ewan Harrison, David K. Jackson, Ian Johnston, Dominic Kwiatkowski, Cordelia Langford, John Sillitoe on behalf of the Wellcome Sanger Institute COVID-19 Surveillance Team                                                                                                                                                                          |
| EP1_ISL_736716                                                                                                                                                                                                                                                                                                                                                                                                                                                                                                                                                                                                                                                                                                                                                                                                 | Lighthouse Lab in Milton Keynes                                                                | Wellcome Sanger Institute for the COVID-19 Genomics UK (COG-UK) Consortium                                                                                                                                                                                                                                                                                                                                                                                                 | The Lighthouse Lab in Milton Keynes and Alex Alderton, Roberto Amato, Sonia Goncalves, Ewan Harrison, David K. Jackson, Ian Johnston, Dominic Kwiatkowski, Cordelia Langford, John Sillitoe on behalf of the Wellcome Sanger Institute COVID-19 Surveillance Team                                                                                                                                                                                                          |
| EP1_ISL_736718, EP1_ISL_736720, EP1_ISL_736726, EP1_ISL_736729, EP1_ISL_736742                                                                                                                                                                                                                                                                                                                                                                                                                                                                                                                                                                                                                                                                                                                                 | Lighthouse Lab in Alderley Park                                                                | Wellcome Sanger Institute for the COVID-19 Genomics UK (COG-UK) Consortium                                                                                                                                                                                                                                                                                                                                                                                                 | Jacquelyn Wynn, Mairead Hyland, The Lighthouse Lab in Alderley Park and Alex Alderton, Roberto Amato, Sonia Goncalves, Ewan Harrison, David K. Jackson, Ian Johnston, Dominic Kwiatkowski, Cordelia Langford, John Sillitoe on behalf of the Wellcome Sanger Institute COVID-19 Surveillance Team                                                                                                                                                                          |
| EP1_ISL_736744                                                                                                                                                                                                                                                                                                                                                                                                                                                                                                                                                                                                                                                                                                                                                                                                 | Lighthouse Lab in Milton Keynes                                                                | Wellcome Sanger Institute for the COVID-19 Genomics UK (COG-UK) Consortium                                                                                                                                                                                                                                                                                                                                                                                                 | The Lighthouse Lab in Milton Keynes and Alex Alderton, Roberto Amato, Sonia Goncalves, Ewan Harrison, David K. Jackson, Ian Johnston, Dominic Kwiatkowski, Cordelia Langford, John Sillitoe on behalf of the Wellcome Sanger Institute COVID-19 Surveillance Team                                                                                                                                                                                                          |
| EP1_ISL_736747, EP1_ISL_736753                                                                                                                                                                                                                                                                                                                                                                                                                                                                                                                                                                                                                                                                                                                                                                                 | Lighthouse Lab in Alderley Park                                                                | Wellcome Sanger Institute for the COVID-19 Genomics UK (COG-UK) Consortium                                                                                                                                                                                                                                                                                                                                                                                                 | Jacquelyn Wynn, Mairead Hyland, The Lighthouse Lab in Alderley Park and Alex Alderton, Roberto Amato, Sonia Goncalves, Ewan Harrison, David K. Jackson, Ian Johnston, Dominic Kwiatkowski, Cordelia Langford, John Sillitoe on behalf of the Wellcome Sanger Institute COVID-19 Surveillance Team                                                                                                                                                                          |
| EP1_ISL_736754                                                                                                                                                                                                                                                                                                                                                                                                                                                                                                                                                                                                                                                                                                                                                                                                 | Lighthouse Lab in Glasgow                                                                      | Wellcome Sanger Institute for the COVID-19 Genomics UK (COG-UK) Consortium                                                                                                                                                                                                                                                                                                                                                                                                 | Harper VanSienhouse, Yurri Kasai, David Gray, Carol Duggan, Anna Dominiczak and Alex Alderton, Roberto Amato, Sonia Goncalves, Ewan Harrison, David K. Jackson, Ian Johnston, Dominic Kwiatkowski, Cordelia Langford, John Sillitoe on behalf of the Wellcome Sanger Institute COVID-19 Surveillance Team                                                                                                                                                                  |
| EP1_ISL_736755, EP1_ISL_736759, EP1_ISL_736760, EP1_ISL_736762, EP1_ISL_736765, EP1_ISL_736766, EP1_ISL_736769, EP1_ISL_736770, EP1_ISL_736771, EP1_ISL_736773                                                                                                                                                                                                                                                                                                                                                                                                                                                                                                                                                                                                                                                 | Lighthouse Lab in Alderley Park                                                                | Wellcome Sanger Institute for the COVID-19 Genomics UK (COG-UK) Consortium                                                                                                                                                                                                                                                                                                                                                                                                 | Jacquelyn Wynn, Mairead Hyland, The Lighthouse Lab in Alderley Park and Alex Alderton, Roberto Amato, Sonia Goncalves, Ewan Harrison, David K. Jackson, Ian Johnston, Dominic Kwiatkowski, Cordelia Langford, John Sillitoe on behalf of the Wellcome Sanger Institute COVID-19 Surveillance Team                                                                                                                                                                          |
| EP1_ISL_736778, EP1_ISL_736788, EP1_ISL_736789, EP1_ISL_736843, EP1_ISL_736844, EP1_ISL_736852, EP1_ISL_736858, EP1_ISL_736859, EP1_ISL_736865, EP1_ISL_736866, EP1_ISL_736869                                                                                                                                                                                                                                                                                                                                                                                                                                                                                                                                                                                                                                 | Lighthouse Lab in Alderley Park                                                                | Wellcome Sanger Institute for the COVID-19 Genomics UK (COG-UK) Consortium                                                                                                                                                                                                                                                                                                                                                                                                 | Jacquelyn Wynn, Mairead Hyland, The Lighthouse Lab in Alderley Park and Alex Alderton, Roberto Amato, Sonia Goncalves, Ewan Harrison, David K. Jackson, Ian Johnston, Dominic Kwiatkowski, Cordelia Langford, John Sillitoe on behalf of the Wellcome Sanger Institute COVID-19 Surveillance Team                                                                                                                                                                          |
| see above                                                                                                                                                                                                                                                                                                                                                                                                                                                                                                                                                                                                                                                                                                                                                                                                      |                                                                                                |                                                                                                                                                                                                                                                                                                                                                                                                                                                                            |                                                                                                                                                                                                                                                                                                                                                                                                                                                                            |
| EP1_ISL_736917                                                                                                                                                                                                                                                                                                                                                                                                                                                                                                                                                                                                                                                                                                                                                                                                 | Pathogen Genomics Center, National Institute of Infectious Diseases                            | Pathogen Genomics Center, National Institute of Infectious Diseases                                                                                                                                                                                                                                                                                                                                                                                                        | Keith Durkin, Maria Atesli, Sébastien Bonhoms, Raphaël Boroux, Boucraha Boujmaia, Céclie Meau, Pierrette Meun, Marie-Pierre Hayette, Vincent Bours                                                                                                                                                                                                                                                                                                                         |
| EP1_ISL_737320, EP1_ISL_737357, EP1_ISL_737359, EP1_ISL_737360, EP1_ISL_737367, EP1_ISL_737373                                                                                                                                                                                                                                                                                                                                                                                                                                                                                                                                                                                                                                                                                                                 | Department of Clinical Microbiology                                                            | GIGA Medical Genomics                                                                                                                                                                                                                                                                                                                                                                                                                                                      |                                                                                                                                                                                                                                                                                                                                                                                                                                                                            |
| EP1_ISL_737374, EP1_ISL_737376                                                                                                                                                                                                                                                                                                                                                                                                                                                                                                                                                                                                                                                                                                                                                                                 |                                                                                                |                                                                                                                                                                                                                                                                                                                                                                                                                                                                            |                                                                                                                                                                                                                                                                                                                                                                                                                                                                            |
| EP1_ISL_737398, EP1_ISL_737400, EP1_ISL_737404, EP1_ISL_737405, EP1_ISL_737408, EP1_ISL_737410, EP1_ISL_737411, EP1_ISL_737412, EP1_ISL_737422, EP1_ISL_737424, EP1_ISL_737427, EP1_ISL_737429, EP1_ISL_737433, EP1_ISL_737438, EP1_ISL_737448, EP1_ISL_737453, EP1_ISL_737461, EP1_ISL_737466, EP1_ISL_737470, EP1_ISL_737475, EP1_ISL_737476, EP1_ISL_737480, EP1_ISL_737485, EP1_ISL_737506, EP1_ISL_737517, EP1_ISL_737520, EP1_ISL_737531, EP1_ISL_737534, EP1_ISL_737543, EP1_ISL_737550, EP1_ISL_737558, EP1_ISL_737582, EP1_ISL_737571, EP1_ISL_737574, EP1_ISL_737576, EP1_ISL_737579, EP1_ISL_737583, EP1_ISL_737584, EP1_ISL_737603, EP1_ISL_737611, EP1_ISL_737615, EP1_ISL_737625, EP1_ISL_737647, EP1_ISL_737648, EP1_ISL_737655, EP1_ISL_737663, EP1_ISL_737671, EP1_ISL_737672, EP1_ISL_737675 | Department of Biosystems Science and Engineering, ETH Zürich                                   | Chaoran Chen, Sarah Nadeau, Catherine Aquino, Ivan Topolitsky, Philipp Jablonski, Lara Fuhrmann, David Derlous, Katharina Jahn, Andraia Cabral de Gouveia, Maria Domenica Wocia, Simon Gruber, Timothy Sykes, Lemnat Opitz, Griffin White, Laura Neff, Doris Popovic, Andrea Patrignani, Jay Tracy, Ralph Schlaepbach, Christiane Beckmann, Maurice Redondo, Olivier Kobel, Christoph Noppert, Sophie Seidel, Noemie Santamaria de Souza, Niko Beerenwinkel, Tanja Stadler |                                                                                                                                                                                                                                                                                                                                                                                                                                                                            |
| see above                                                                                                                                                                                                                                                                                                                                                                                                                                                                                                                                                                                                                                                                                                                                                                                                      |                                                                                                |                                                                                                                                                                                                                                                                                                                                                                                                                                                                            |                                                                                                                                                                                                                                                                                                                                                                                                                                                                            |
| EP1_ISL_737682, EP1_ISL_737692                                                                                                                                                                                                                                                                                                                                                                                                                                                                                                                                                                                                                                                                                                                                                                                 | Department of Biosystems Science and Engineering, ETH Zürich                                   | Department of Biosystems Science and Engineering, ETH Zürich                                                                                                                                                                                                                                                                                                                                                                                                               | Chaoran Chen, Sarah Nadeau, Ivan Topolitsky, Emmanuel Dermitzakis, Keith Harshman, Ioannis Xenarios, Henri Peguet, Lorenzo Cerutti, Deborah Parat, Philipp Jablonski, Lara Fuhrmann, David Derlous, Katharina Jahn, Christiane Beckmann, Maurice Redondo, Olivier Kobel, Christoph Noppert, Sophie Seidel, Noemie Santamaria de Souza, Niko Beerenwinkel, Tanja Stadler                                                                                                    |
| EP1_ISL_737712, EP1_ISL_737715, EP1_ISL_737716, EP1_ISL_737717, EP1_ISL_737734, EP1_ISL_737736, EP1_ISL_737738, EP1_ISL_737745                                                                                                                                                                                                                                                                                                                                                                                                                                                                                                                                                                                                                                                                                 | Department of Biosystems Science and Engineering, ETH Zürich                                   | Department of Biosystems Science and Engineering, ETH Zürich                                                                                                                                                                                                                                                                                                                                                                                                               | Chaoran Chen, Sarah Nadeau, Catherine Aquino, Ivan Topolitsky, Philipp Jablonski, Lara Fuhrmann, David Derlous, Katharina Jahn, Andraia Cabral de Gouveia, Maria Domenica Wocia, Simon Gruber, Timothy Sykes, Lemnat Opitz, Griffin White, Laura Neff, Doris Popovic, Andrea Patrignani, Jay Tracy, Ralph Schlaepbach, Christiane Beckmann, Maurice Redondo, Olivier Kobel, Christoph Noppert, Sophie Seidel, Noemie Santamaria de Souza, Niko Beerenwinkel, Tanja Stadler |
| EP1_ISL_737759, EP1_ISL_737761, EP1_ISL_737762, EP1_ISL_737766, EP1_ISL_737771, EP1_ISL_737783, EP1_ISL_737788, EP1_ISL_737789, EP1_ISL_737795, EP1_ISL_737797, EP1_ISL_737801, EP1_ISL_737803, EP1_ISL_737820, EP1_ISL_737821, EP1_ISL_737844, EP1_ISL_737848, EP1_ISL_737853, EP1_ISL_737875, EP1_ISL_737876                                                                                                                                                                                                                                                                                                                                                                                                                                                                                                 | Department of Biosystems Science and Engineering, ETH Zürich                                   | Department of Biosystems Science and Engineering, ETH Zürich                                                                                                                                                                                                                                                                                                                                                                                                               | Chaoran Chen, Sarah Nadeau, Catherine Aquino, Ivan Topolitsky, Philipp Jablonski, Lara Fuhrmann, David Derlous, Katharina Jahn, Andraia Cabral de Gouveia, Maria Domenica Wocia, Simon Gruber, Timothy Sykes, Lemnat Opitz, Griffin White, Laura Neff, Doris Popovic, Andrea Patrignani, Jay Tracy, Ralph Schlaepbach, Christiane Beckmann, Maurice Redondo, Olivier Kobel, Christoph Noppert, Sophie Seidel, Noemie Santamaria de Souza, Niko Beerenwinkel, Tanja Stadler |
| see above                                                                                                                                                                                                                                                                                                                                                                                                                                                                                                                                                                                                                                                                                                                                                                                                      |                                                                                                |                                                                                                                                                                                                                                                                                                                                                                                                                                                                            |                                                                                                                                                                                                                                                                                                                                                                                                                                                                            |
| EP1_ISL_737880, EP1_ISL_737881, EP1_ISL_737883, EP1_ISL_737884                                                                                                                                                                                                                                                                                                                                                                                                                                                                                                                                                                                                                                                                                                                                                 | Department of Biosystems Science and Engineering, ETH Zürich                                   | Department of Biosystems Science and Engineering, ETH Zürich                                                                                                                                                                                                                                                                                                                                                                                                               | Chaoran Chen, Sarah Nadeau, Catherine Aquino, Ivan Topolitsky, Philipp Jablonski, Lara Fuhrmann, David Derlous, Katharina Jahn, Andraia Cabral de Gouveia, Maria Domenica Wocia, Simon Gruber, Timothy Sykes, Lemnat Opitz, Griffin White, Laura Neff, Doris Popovic, Andrea Patrignani, Jay Tracy, Ralph Schlaepbach, Christiane Beckmann, Maurice Redondo, Olivier Kobel, Christoph Noppert, Sophie Seidel, Noemie Santamaria de Souza, Niko Beerenwinkel, Tanja Stadler |
| EP1_ISL_737908, EP1_ISL_737916                                                                                                                                                                                                                                                                                                                                                                                                                                                                                                                                                                                                                                                                                                                                                                                 | Department of Biosystems Science and Engineering, ETH Zürich                                   | Department of Biosystems Science and Engineering, ETH Zürich                                                                                                                                                                                                                                                                                                                                                                                                               | Chaoran Chen, Sarah Nadeau, Catherine Aquino, Ivan Topolitsky, Philipp Jablonski, Lara Fuhrmann, David Derlous, Katharina Jahn, Andraia Cabral de Gouveia, Maria Domenica Wocia, Simon Gruber, Timothy Sykes, Lemnat Opitz, Griffin White, Laura Neff, Doris Popovic, Andrea Patrignani, Jay Tracy, Ralph Schlaepbach, Christiane Beckmann, Maurice Redondo, Olivier Kobel, Christoph Noppert, Sophie Seidel, Noemie Santamaria de Souza, Niko Beerenwinkel, Tanja Stadler |
| EP1_ISL_737923                                                                                                                                                                                                                                                                                                                                                                                                                                                                                                                                                                                                                                                                                                                                                                                                 | Department of Biosystems Science and Engineering, ETH Zürich                                   | Department of Biosystems Science and Engineering, ETH Zürich                                                                                                                                                                                                                                                                                                                                                                                                               | Chaoran Chen, Sarah Nadeau, Catherine Aquino, Ivan Topolitsky, Philipp Jablonski, Lara Fuhrmann, David Derlous, Katharina Jahn, Andraia Cabral de Gouveia, Maria Domenica Wocia, Simon Gruber, Timothy Sykes, Lemnat Opitz, Griffin White, Laura Neff, Doris Popovic, Andrea Patrignani, Jay Tracy, Ralph Schlaepbach, Christiane Beckmann, Maurice Redondo, Olivier Kobel, Christoph Noppert, Sophie Seidel, Noemie Santamaria de Souza, Niko Beerenwinkel, Tanja Stadler |
| EP1_ISL_738091, EP1_ISL_738111                                                                                                                                                                                                                                                                                                                                                                                                                                                                                                                                                                                                                                                                                                                                                                                 | Instituto Nacional de Saude (INSA)                                                             | Instituto Nacional de Saude (INSA)                                                                                                                                                                                                                                                                                                                                                                                                                                         | Mauricio Viscardi, Lorena Cardillo, Giovanna Fusco                                                                                                                                                                                                                                                                                                                                                                                                                         |
| EP1_ISL_738121, EP1_ISL_738122, EP1_ISL_738123, EP1_ISL_738124, EP1_ISL_738130, EP1_ISL_738131, EP1_ISL_738132                                                                                                                                                                                                                                                                                                                                                                                                                                                                                                                                                                                                                                                                                                 | ZSM-U.O.C. Virologia                                                                           | Istituto Zooprofilattico Sperimentale del Mezzogiorno                                                                                                                                                                                                                                                                                                                                                                                                                      |                                                                                                                                                                                                                                                                                                                                                                                                                                                                            |
| EP1_ISL_738144                                                                                                                                                                                                                                                                                                                                                                                                                                                                                                                                                                                                                                                                                                                                                                                                 | University of Bari Biomedical Sciences and Human Oncology                                      | University of Bari Biomedical Sciences and Human Oncology                                                                                                                                                                                                                                                                                                                                                                                                                  | Maria Chironna, Anna Sallustio, Daniela Loconsole, Marisa Accogli                                                                                                                                                                                                                                                                                                                                                                                                          |
| EP1_ISL_738225, EP1_ISL_738227, EP1_ISL_738240                                                                                                                                                                                                                                                                                                                                                                                                                                                                                                                                                                                                                                                                                                                                                                 | LZ Leuven, National Reference Laboratory for Coronavirus, Laboratory Medicine, Leuven, Belgium | KU Leuven, Rega Institute, Clinical and Epidemiological Virology                                                                                                                                                                                                                                                                                                                                                                                                           | Tony Wawina-Bokilanga, Joan Martí-Carerras, Bart Vermeeschoten, Piet Kase                                                                                                                                                                                                                                                                                                                                                                                                  |
| EP1_ISL_739694, EP1_ISL_739698, EP1_ISL_739726, EP1_ISL_739729, EP1_ISL_739741, EP1_ISL_739744, EP1_ISL_739744, EP1_ISL_739748, EP1_ISL_739754, EP1_ISL_739758, EP1_ISL_739768, EP1_ISL_739794, EP1_ISL_739799, EP1_ISL_739808, EP1_ISL_739811, EP1_ISL_739812, EP1_ISL_739816, EP1_ISL_739825, EP1_ISL_739828, EP1_ISL_739830, EP1_ISL_739836, EP1_ISL_739842, EP1_ISL_739852, EP1_ISL_739854, EP1_ISL_739854, EP1_ISL_739855, EP1_ISL_739855, EP1_ISL_739869, EP1_ISL_739872, EP1_ISL_739873, EP1_ISL_739886, EP1_ISL_739886, EP1_ISL_739903, EP1_ISL_739906, EP1_ISL_739921, EP1_ISL_739922                                                                                                                                                                                                                 | University of Bari Biomedical Sciences and Human Oncology                                      |                                                                                                                                                                                                                                                                                                                                                                                                                                                                            |                                                                                                                                                                                                                                                                                                                                                                                                                                                                            |







|                                                                                                                                                                                                                                                                                                                                                                                                                                                                                                                                                                                                                                                                                                                                                                                                                                                                                                                                                                                                |                                                                                                                                                                                                                                                                                                                                                                     |                                                                                                                                                                                                                   |                                                                                                                                                                                                                                                                                                                      |
|------------------------------------------------------------------------------------------------------------------------------------------------------------------------------------------------------------------------------------------------------------------------------------------------------------------------------------------------------------------------------------------------------------------------------------------------------------------------------------------------------------------------------------------------------------------------------------------------------------------------------------------------------------------------------------------------------------------------------------------------------------------------------------------------------------------------------------------------------------------------------------------------------------------------------------------------------------------------------------------------|---------------------------------------------------------------------------------------------------------------------------------------------------------------------------------------------------------------------------------------------------------------------------------------------------------------------------------------------------------------------|-------------------------------------------------------------------------------------------------------------------------------------------------------------------------------------------------------------------|----------------------------------------------------------------------------------------------------------------------------------------------------------------------------------------------------------------------------------------------------------------------------------------------------------------------|
| EP1_ISL_747459, EP1_ISL_747460, EP1_ISL_747461, EP1_ISL_747462                                                                                                                                                                                                                                                                                                                                                                                                                                                                                                                                                                                                                                                                                                                                                                                                                                                                                                                                 | Spediatele San Bonifacio                                                                                                                                                                                                                                                                                                                                            | Istituto Zooprofilattico Sperimentale delle Venezie                                                                                                                                                               | Adelaide Milani, Alessia Schivo, Annalisa Salvato, Erika Giorgia Quaranta, Ambra Pastori, Bianca Zecchin, Alice Fusaro, Isabella Monno, Calogero Terrigno, Antonia Ricci                                                                                                                                             |
| EP1_ISL_747465, EP1_ISL_747466, EP1_ISL_747467, EP1_ISL_747468, EP1_ISL_747469                                                                                                                                                                                                                                                                                                                                                                                                                                                                                                                                                                                                                                                                                                                                                                                                                                                                                                                 | Ospedale Mater Saluis                                                                                                                                                                                                                                                                                                                                               | Istituto Zooprofilattico Sperimentale delle Venezie                                                                                                                                                               | Adelaide Milani, Alessia Schivo, Annalisa Salvato, Erika Giorgia Quaranta, Ambra Pastori, Bianca Zecchin, Alice Fusaro, Isabella Monno, Calogero Terrigno, Antonia Ricci                                                                                                                                             |
| EP1_ISL_747473, EP1_ISL_747474, EP1_ISL_747475, EP1_ISL_747476, EP1_ISL_747477, EP1_ISL_747481                                                                                                                                                                                                                                                                                                                                                                                                                                                                                                                                                                                                                                                                                                                                                                                                                                                                                                 | USSS9 Districto di Bussolengo<br>USSS 5 Polesana                                                                                                                                                                                                                                                                                                                    | Istituto Zooprofilattico Sperimentale delle Venezie<br>Istituto Zooprofilattico Sperimentale delle Venezie                                                                                                        | Adelaide Milani, Alessia Schivo, Annalisa Salvato, Erika Giorgia Quaranta, Ambra Pastori, Bianca Zecchin, Alice Fusaro, Isabella Monno, Calogero Terrigno, Antonia Ricci                                                                                                                                             |
| EP1_ISL_747495, EP1_ISL_747498, EP1_ISL_747499, EP1_ISL_747500, EP1_ISL_747513, EP1_ISL_747514, EP1_ISL_747515, EP1_ISL_747516                                                                                                                                                                                                                                                                                                                                                                                                                                                                                                                                                                                                                                                                                                                                                                                                                                                                 | Respiratory Virus Unit, National Infection Service, Public Health England                                                                                                                                                                                                                                                                                           | COVID-19 Genomics UK (COG-UK) Consortium                                                                                                                                                                          | PHE Covid Sequencing Team                                                                                                                                                                                                                                                                                            |
| EP1_ISL_747636, EP1_ISL_747731, EP1_ISL_747749, EP1_ISL_747769, EP1_ISL_747804, EP1_ISL_747822, EP1_ISL_747867, EP1_ISL_747872, EP1_ISL_747903, EP1_ISL_747947, EP1_ISL_747980, EP1_ISL_748052, EP1_ISL_748055, EP1_ISL_748078, EP1_ISL_748115, EP1_ISL_748122, EP1_ISL_748128, EP1_ISL_748129, EP1_ISL_748133, EP1_ISL_748433, EP1_ISL_748494, EP1_ISL_748495, EP1_ISL_748496, EP1_ISL_748675, EP1_ISL_748681, EP1_ISL_748684, EP1_ISL_748746, EP1_ISL_748748, EP1_ISL_748896, EP1_ISL_748913, EP1_ISL_748942, EP1_ISL_748944, EP1_ISL_749156, EP1_ISL_749376, EP1_ISL_749501, EP1_ISL_749549, EP1_ISL_749584, EP1_ISL_749602, EP1_ISL_749644, EP1_ISL_749651, EP1_ISL_749744, EP1_ISL_749784, EP1_ISL_749889, EP1_ISL_749948, EP1_ISL_749957, EP1_ISL_749983, EP1_ISL_750087, EP1_ISL_750096, EP1_ISL_750281, EP1_ISL_750520, EP1_ISL_750560, EP1_ISL_750567, EP1_ISL_750581, EP1_ISL_750596, EP1_ISL_750630, EP1_ISL_750695, EP1_ISL_750699, EP1_ISL_751003, EP1_ISL_751009, EP1_ISL_751104 | Department of Virus and Microbiological Special Diagnostics, Statens Serum Institut, Copenhagen, Denmark<br>HRCSS Saeco Cuore Don Calabria Hospital, Department of Infectious, Tropical Diseases & Microbiology<br>CHU Purpan - Laboratoire de Virologie - Institut Fédératif de Biologie<br>CHU Purpan - Laboratoire de Virologie - Institut Fédératif de Biologie | Albertsen Lab, Department of Chemistry and Bioscience, Aalborg University, Denmark<br>University of Verona, Department of Biotechnology<br>CHU Purpan - Laboratoire de Virologie - Institut Fédératif de Biologie | Danish Covid-19 Genome Consortium<br>Antonio Mori, Michela Delana, Elena Pomati, Chiara Piuzeilli, Giulia Lopatrinello, Luca Marcolungo, Cristina Beltrami, Chiara Degli Esposti, Emanuela Cosentino, Massimo Delle Donne<br>Lator J., Renger N., Dulois M., Carcenac R., Haner A., Boyer P., Tremeaux P., Izopet J. |
| EP1_ISL_751341, EP1_ISL_751343                                                                                                                                                                                                                                                                                                                                                                                                                                                                                                                                                                                                                                                                                                                                                                                                                                                                                                                                                                 | see above                                                                                                                                                                                                                                                                                                                                                           | see above                                                                                                                                                                                                         | see above                                                                                                                                                                                                                                                                                                            |
| EP1_ISL_751450, EP1_ISL_751456, EP1_ISL_751459, EP1_ISL_751481, EP1_ISL_751482, EP1_ISL_751483                                                                                                                                                                                                                                                                                                                                                                                                                                                                                                                                                                                                                                                                                                                                                                                                                                                                                                 | CHU Purpan - Laboratoire de Virologie - Institut Fédératif de Biologie                                                                                                                                                                                                                                                                                              | National Virus Reference Laboratory                                                                                                                                                                               | Michael Carr, Gabriel Gonzalez, Jonathan Dean, Daniel Hare, Cillian F De Gascon                                                                                                                                                                                                                                      |
| EP1_ISL_752514, EP1_ISL_752519, EP1_ISL_752582, EP1_ISL_752563, EP1_ISL_752568, EP1_ISL_752572, EP1_ISL_752577, EP1_ISL_752578, EP1_ISL_752580, EP1_ISL_752583, EP1_ISL_752588, EP1_ISL_752589                                                                                                                                                                                                                                                                                                                                                                                                                                                                                                                                                                                                                                                                                                                                                                                                 | see above                                                                                                                                                                                                                                                                                                                                                           | see above                                                                                                                                                                                                         | see above                                                                                                                                                                                                                                                                                                            |
| EP1_ISL_753707, EP1_ISL_753717, EP1_ISL_753751, EP1_ISL_753816, EP1_ISL_753842, EP1_ISL_753863, EP1_ISL_753894, EP1_ISL_753885, EP1_ISL_753893, EP1_ISL_753894, EP1_ISL_753895, EP1_ISL_753899, EP1_ISL_753901, EP1_ISL_753906, EP1_ISL_753908, EP1_ISL_753909, EP1_ISL_753912, EP1_ISL_753916, EP1_ISL_754016, EP1_ISL_754018, EP1_ISL_754020                                                                                                                                                                                                                                                                                                                                                                                                                                                                                                                                                                                                                                                 | see above                                                                                                                                                                                                                                                                                                                                                           | see above                                                                                                                                                                                                         | see above                                                                                                                                                                                                                                                                                                            |
| EP1_ISL_754123                                                                                                                                                                                                                                                                                                                                                                                                                                                                                                                                                                                                                                                                                                                                                                                                                                                                                                                                                                                 | UCLA Clinical Micro Lab                                                                                                                                                                                                                                                                                                                                             | Los Angeles County PHL                                                                                                                                                                                            | P. Hemrajata et al                                                                                                                                                                                                                                                                                                   |
| EP1_ISL_754161, EP1_ISL_754170                                                                                                                                                                                                                                                                                                                                                                                                                                                                                                                                                                                                                                                                                                                                                                                                                                                                                                                                                                 | Laboratoire de Microbiologie                                                                                                                                                                                                                                                                                                                                        | National Reference Center for Viruses of Respiratory Infections, Institut Pasteur, Paris                                                                                                                          | Manton Barbet, Sylvie Behilli, Meline Bizard, Angela Bisebarre, Camille Capel, Etienne Simon-Lorère, Vincent Enroul, Maud Vanpeene, Sylvie van der Werf, Marie-Sarah Fangous                                                                                                                                         |
| EP1_ISL_754222, EP1_ISL_754245, EP1_ISL_754287, EP1_ISL_754295, EP1_ISL_754296, EP1_ISL_754297, EP1_ISL_754298, EP1_ISL_754299, EP1_ISL_754306, EP1_ISL_754307, EP1_ISL_754312, EP1_ISL_754313, EP1_ISL_754314, EP1_ISL_754315, EP1_ISL_754316, EP1_ISL_754317, EP1_ISL_754318, EP1_ISL_754319, EP1_ISL_754321, EP1_ISL_754322, EP1_ISL_754323, EP1_ISL_754324, EP1_ISL_754325, EP1_ISL_754326, EP1_ISL_754332, EP1_ISL_754337, EP1_ISL_754338, EP1_ISL_754350, EP1_ISL_754351, EP1_ISL_754352, EP1_ISL_754354, EP1_ISL_754354, EP1_ISL_754362, EP1_ISL_754363, EP1_ISL_754364, EP1_ISL_754365, EP1_ISL_754366, EP1_ISL_754367, EP1_ISL_754368, EP1_ISL_754369, EP1_ISL_754370, EP1_ISL_754378, EP1_ISL_754379, EP1_ISL_754380, EP1_ISL_754381, EP1_ISL_754382, EP1_ISL_754383, EP1_ISL_754384, EP1_ISL_754384, EP1_ISL_754389                                                                                                                                                                 | Charité Universitätsmedizin Berlin, Institut für Virologie/Labor Berlin<br>Charité Universitätsmedizin Berlin, Institut für Virologie<br>National Reference Center for Viruses of Respiratory Infections, Institut Pasteur, Paris<br>COVID-19 Genomics UK (COG-UK) Consortium                                                                                       | Manton Barbet, Sylvie Behilli, Meline Bizard, Angela Bisebarre, Camille Capel, Etienne Simon-Lorère, Vincent Enroul, Maud Vanpeene, Sylvie van der Werf<br>PHE Covid Sequencing Team                              |                                                                                                                                                                                                                                                                                                                      |
| EP1_ISL_754851, EP1_ISL_754852                                                                                                                                                                                                                                                                                                                                                                                                                                                                                                                                                                                                                                                                                                                                                                                                                                                                                                                                                                 | Laboratoire de Virologie Hôpital Robert Debré                                                                                                                                                                                                                                                                                                                       | National Reference Center for Viruses of Respiratory Infections, Institut Pasteur, Paris                                                                                                                          | Manton Barbet, Sylvie Behilli, Meline Bizard, Angela Bisebarre, Camille Capel, Etienne Simon-Lorère, Vincent Enroul, Maud Vanpeene, Sylvie van der Werf, Andreotti Laurent                                                                                                                                           |

We gratefully acknowledge the following Authors from the Originating laboratories responsible for obtaining the specimens, as well as the Submitting laboratories where the genome data were generated and shared via GISAID, on which this research is based.

All Submitters of data may be contacted directly via [www.gisaid.org](http://www.gisaid.org)

Authors are sorted alphabetically.

| Accession ID                                                                                                                                                                                                                                                                                                                                                                                                                                                                                                                                                                                                                                                                                                                                                                                                                                                                                                                                                                                                                                                                                                                                                                                                                                                                                                                                                                                                                                                                                                                                                                                                                                                                                                                                                                                                                                                                                                                                                                                                                                                                                                                                                                                                                                                                                                                                                                                                                                                                                                                                                                                                                                                                                                                                                                                                                                                                                                                                                                                                                                                                                                                                                                                                                                                                                                                                                                                                                                                                                                                                                                                                                                   | Originating Laboratory                                                         | Submitting Laboratory                                                                                                                                                                                                                                                                                                                                                                                                                                                                                                                                                                                                                                                                          | Authors                                                                                                                                                                                                                                                                                                                                                                                                                                                                                                                                                                                                                                                                                        |
|------------------------------------------------------------------------------------------------------------------------------------------------------------------------------------------------------------------------------------------------------------------------------------------------------------------------------------------------------------------------------------------------------------------------------------------------------------------------------------------------------------------------------------------------------------------------------------------------------------------------------------------------------------------------------------------------------------------------------------------------------------------------------------------------------------------------------------------------------------------------------------------------------------------------------------------------------------------------------------------------------------------------------------------------------------------------------------------------------------------------------------------------------------------------------------------------------------------------------------------------------------------------------------------------------------------------------------------------------------------------------------------------------------------------------------------------------------------------------------------------------------------------------------------------------------------------------------------------------------------------------------------------------------------------------------------------------------------------------------------------------------------------------------------------------------------------------------------------------------------------------------------------------------------------------------------------------------------------------------------------------------------------------------------------------------------------------------------------------------------------------------------------------------------------------------------------------------------------------------------------------------------------------------------------------------------------------------------------------------------------------------------------------------------------------------------------------------------------------------------------------------------------------------------------------------------------------------------------------------------------------------------------------------------------------------------------------------------------------------------------------------------------------------------------------------------------------------------------------------------------------------------------------------------------------------------------------------------------------------------------------------------------------------------------------------------------------------------------------------------------------------------------------------------------------------------------------------------------------------------------------------------------------------------------------------------------------------------------------------------------------------------------------------------------------------------------------------------------------------------------------------------------------------------------------------------------------------------------------------------------------------------------|--------------------------------------------------------------------------------|------------------------------------------------------------------------------------------------------------------------------------------------------------------------------------------------------------------------------------------------------------------------------------------------------------------------------------------------------------------------------------------------------------------------------------------------------------------------------------------------------------------------------------------------------------------------------------------------------------------------------------------------------------------------------------------------|------------------------------------------------------------------------------------------------------------------------------------------------------------------------------------------------------------------------------------------------------------------------------------------------------------------------------------------------------------------------------------------------------------------------------------------------------------------------------------------------------------------------------------------------------------------------------------------------------------------------------------------------------------------------------------------------|
| EPH_ISL_649108, EPH_ISL_649111                                                                                                                                                                                                                                                                                                                                                                                                                                                                                                                                                                                                                                                                                                                                                                                                                                                                                                                                                                                                                                                                                                                                                                                                                                                                                                                                                                                                                                                                                                                                                                                                                                                                                                                                                                                                                                                                                                                                                                                                                                                                                                                                                                                                                                                                                                                                                                                                                                                                                                                                                                                                                                                                                                                                                                                                                                                                                                                                                                                                                                                                                                                                                                                                                                                                                                                                                                                                                                                                                                                                                                                                                 | Respiratory Virus Unit, Microbiology Services Colindale, Public Health England | COVID-19 Genomics UK (COG-UK) Consortium                                                                                                                                                                                                                                                                                                                                                                                                                                                                                                                                                                                                                                                       | PHE Covid Sequencing Team                                                                                                                                                                                                                                                                                                                                                                                                                                                                                                                                                                                                                                                                      |
| EPH_ISL_649122                                                                                                                                                                                                                                                                                                                                                                                                                                                                                                                                                                                                                                                                                                                                                                                                                                                                                                                                                                                                                                                                                                                                                                                                                                                                                                                                                                                                                                                                                                                                                                                                                                                                                                                                                                                                                                                                                                                                                                                                                                                                                                                                                                                                                                                                                                                                                                                                                                                                                                                                                                                                                                                                                                                                                                                                                                                                                                                                                                                                                                                                                                                                                                                                                                                                                                                                                                                                                                                                                                                                                                                                                                 | Lighthouse Lab in Milton Keynes                                                | Wellcome Sanger Institute for the COVID-19 Genomics UK (COG-UK) Consortium                                                                                                                                                                                                                                                                                                                                                                                                                                                                                                                                                                                                                     | The Lighthouse Lab in Milton Keynes and Alex Alderton, Roberto Amato, Sonia Goncalves, Ewan Harrison, David K. Jackson, Ian Johnston, Dominic Kwiatkowski, Cordelia Langford, John Sillitoe on behalf of the Wellcome Sanger Institute COVID-19 Surveillance Team ( <a href="http://www.sanger.ac.uk/covid-team">http://www.sanger.ac.uk/covid-team</a> )                                                                                                                                                                                                                                                                                                                                      |
| EPH_ISL_649193, EPH_ISL_649194, EPH_ISL_649196, EPH_ISL_649197, EPH_ISL_649199, EPH_ISL_649201, EPH_ISL_649202, EPH_ISL_649208, EPH_ISL_649209, EPH_ISL_649210, EPH_ISL_649211, EPH_ISL_649212, EPH_ISL_649214, EPH_ISL_649216, EPH_ISL_649217, EPH_ISL_649219, EPH_ISL_649222, EPH_ISL_649224, EPH_ISL_649228, EPH_ISL_649230, EPH_ISL_649231, EPH_ISL_649232, EPH_ISL_649233, EPH_ISL_649237, EPH_ISL_649238, EPH_ISL_649240, EPH_ISL_649246, EPH_ISL_649248, EPH_ISL_649255, EPH_ISL_649256, EPH_ISL_649257, EPH_ISL_649258, EPH_ISL_649259, EPH_ISL_649262, EPH_ISL_649263, EPH_ISL_649264, EPH_ISL_649271, EPH_ISL_649274, EPH_ISL_649276, EPH_ISL_649277, EPH_ISL_649278, EPH_ISL_649280, EPH_ISL_649282, EPH_ISL_649284, EPH_ISL_649289, EPH_ISL_649291, EPH_ISL_649292, EPH_ISL_649293, EPH_ISL_649295, EPH_ISL_649298, EPH_ISL_649299, EPH_ISL_649300, EPH_ISL_649301, EPH_ISL_649302, EPH_ISL_649303, EPH_ISL_649304, EPH_ISL_649305, EPH_ISL_649306, EPH_ISL_649307, EPH_ISL_649308, EPH_ISL_649309, EPH_ISL_649310, EPH_ISL_649311, EPH_ISL_649312, EPH_ISL_649313, EPH_ISL_649314, EPH_ISL_649315, EPH_ISL_649316, EPH_ISL_649317, EPH_ISL_649318, EPH_ISL_649319, EPH_ISL_649320, EPH_ISL_649321, EPH_ISL_649322, EPH_ISL_649323, EPH_ISL_649324, EPH_ISL_649325, EPH_ISL_649326, EPH_ISL_649327, EPH_ISL_649328, EPH_ISL_649329, EPH_ISL_649330, EPH_ISL_649331, EPH_ISL_649332, EPH_ISL_649333, EPH_ISL_649334, EPH_ISL_649335, EPH_ISL_649336, EPH_ISL_649337, EPH_ISL_649338, EPH_ISL_649339, EPH_ISL_649340, EPH_ISL_649341, EPH_ISL_649342, EPH_ISL_649343, EPH_ISL_649344, EPH_ISL_649345, EPH_ISL_649346, EPH_ISL_649347, EPH_ISL_649348, EPH_ISL_649349, EPH_ISL_649350, EPH_ISL_649351, EPH_ISL_649352, EPH_ISL_649353, EPH_ISL_649354, EPH_ISL_649355, EPH_ISL_649356, EPH_ISL_649357, EPH_ISL_649358, EPH_ISL_649359, EPH_ISL_649360, EPH_ISL_649361, EPH_ISL_649362, EPH_ISL_649363, EPH_ISL_649364, EPH_ISL_649365, EPH_ISL_649366, EPH_ISL_649367, EPH_ISL_649368, EPH_ISL_649369, EPH_ISL_649370, EPH_ISL_649371, EPH_ISL_649372, EPH_ISL_649373, EPH_ISL_649374, EPH_ISL_649375, EPH_ISL_649376, EPH_ISL_649377, EPH_ISL_649378, EPH_ISL_649379, EPH_ISL_649380, EPH_ISL_649381, EPH_ISL_649382, EPH_ISL_649383, EPH_ISL_649384, EPH_ISL_649385, EPH_ISL_649386, EPH_ISL_649387, EPH_ISL_649388, EPH_ISL_649389, EPH_ISL_649390, EPH_ISL_649391, EPH_ISL_649392, EPH_ISL_649393, EPH_ISL_649394, EPH_ISL_649395, EPH_ISL_649396, EPH_ISL_649397, EPH_ISL_649398, EPH_ISL_649399, EPH_ISL_649400, EPH_ISL_649401, EPH_ISL_649402, EPH_ISL_649403, EPH_ISL_649404, EPH_ISL_649405, EPH_ISL_649406, EPH_ISL_649407, EPH_ISL_649408, EPH_ISL_649409, EPH_ISL_649410, EPH_ISL_649411, EPH_ISL_649412, EPH_ISL_649413, EPH_ISL_649414, EPH_ISL_649415, EPH_ISL_649416, EPH_ISL_649417, EPH_ISL_649418, EPH_ISL_649419, EPH_ISL_649420, EPH_ISL_649421, EPH_ISL_649422, EPH_ISL_649423, EPH_ISL_649424, EPH_ISL_649425, EPH_ISL_649426, EPH_ISL_649427, EPH_ISL_649428, EPH_ISL_649429, EPH_ISL_649430, EPH_ISL_649432, EPH_ISL_649435, EPH_ISL_649436, EPH_ISL_649437, EPH_ISL_649438, EPH_ISL_649439, EPH_ISL_649440, EPH_ISL_649441, EPH_ISL_649442, EPH_ISL_649443, EPH_ISL_649444, EPH_ISL_649445, EPH_ISL_649446, EPH_ISL_649447, EPH_ISL_649448, EPH_ISL_649449, EPH_ISL_649450, EPH_ISL_649451, EPH_ISL_649452, EPH_ISL_649453, EPH_ISL_649454, EPH_ISL_649455, EPH_ISL_649456, EPH_ISL_649457, EPH_ISL_649458, EPH_ISL_649459, EPH_ISL_649460, EPH_ISL_649461, EPH_ISL_649462, EPH_ISL_649463, EPH_ISL_649464, EPH_ISL_649466, EPH_ISL_649471, EPH_ISL_649473, EPH_ISL_649474, EPH_ISL_649475, EPH_ISL_649477 | Wellcome Sanger Institute for the COVID-19 Genomics UK (COG-UK) Consortium     | Jacquelyn Wynn, Mairead Hyland, The Lighthouse Lab in Alderley Park and Alex Alderton, Roberto Amato, Sonia Goncalves, Ewan Harrison, David K. Jackson, Ian Johnston, Dominic Kwiatkowski, Cordelia Langford, John Sillitoe on behalf of the Wellcome Sanger Institute COVID-19 Surveillance Team ( <a href="http://www.sanger.ac.uk/covid-team">http://www.sanger.ac.uk/covid-team</a> )                                                                                                                                                                                                                                                                                                      |                                                                                                                                                                                                                                                                                                                                                                                                                                                                                                                                                                                                                                                                                                |
| see above                                                                                                                                                                                                                                                                                                                                                                                                                                                                                                                                                                                                                                                                                                                                                                                                                                                                                                                                                                                                                                                                                                                                                                                                                                                                                                                                                                                                                                                                                                                                                                                                                                                                                                                                                                                                                                                                                                                                                                                                                                                                                                                                                                                                                                                                                                                                                                                                                                                                                                                                                                                                                                                                                                                                                                                                                                                                                                                                                                                                                                                                                                                                                                                                                                                                                                                                                                                                                                                                                                                                                                                                                                      | Lighthouse Lab in Alderley Park                                                | Wellcome Sanger Institute for the COVID-19 Genomics UK (COG-UK) Consortium                                                                                                                                                                                                                                                                                                                                                                                                                                                                                                                                                                                                                     | Jacquelyn Wynn, Mairead Hyland, The Lighthouse Lab in Alderley Park and Alex Alderton, Roberto Amato, Sonia Goncalves, Ewan Harrison, David K. Jackson, Ian Johnston, Dominic Kwiatkowski, Cordelia Langford, John Sillitoe on behalf of the Wellcome Sanger Institute COVID-19 Surveillance Team ( <a href="http://www.sanger.ac.uk/covid-team">http://www.sanger.ac.uk/covid-team</a> )                                                                                                                                                                                                                                                                                                      |
| EPH_ISL_649482                                                                                                                                                                                                                                                                                                                                                                                                                                                                                                                                                                                                                                                                                                                                                                                                                                                                                                                                                                                                                                                                                                                                                                                                                                                                                                                                                                                                                                                                                                                                                                                                                                                                                                                                                                                                                                                                                                                                                                                                                                                                                                                                                                                                                                                                                                                                                                                                                                                                                                                                                                                                                                                                                                                                                                                                                                                                                                                                                                                                                                                                                                                                                                                                                                                                                                                                                                                                                                                                                                                                                                                                                                 | Lighthouse Lab in Cambridge                                                    | Wellcome Sanger Institute for the COVID-19 Genomics UK (COG-UK) Consortium                                                                                                                                                                                                                                                                                                                                                                                                                                                                                                                                                                                                                     | Rob Howes, The Lighthouse Lab in Cambridge and Alex Alderton, Roberto Amato, Sonia Goncalves, Ewan Harrison, David K. Jackson, Ian Johnston, Dominic Kwiatkowski, Cordelia Langford, John Sillitoe on behalf of the Wellcome Sanger Institute COVID-19 Surveillance Team ( <a href="http://www.sanger.ac.uk/covid-team">http://www.sanger.ac.uk/covid-team</a> )                                                                                                                                                                                                                                                                                                                               |
| EPH_ISL_649484, EPH_ISL_649485, EPH_ISL_649488, EPH_ISL_649490                                                                                                                                                                                                                                                                                                                                                                                                                                                                                                                                                                                                                                                                                                                                                                                                                                                                                                                                                                                                                                                                                                                                                                                                                                                                                                                                                                                                                                                                                                                                                                                                                                                                                                                                                                                                                                                                                                                                                                                                                                                                                                                                                                                                                                                                                                                                                                                                                                                                                                                                                                                                                                                                                                                                                                                                                                                                                                                                                                                                                                                                                                                                                                                                                                                                                                                                                                                                                                                                                                                                                                                 | Lighthouse Lab in Alderley Park                                                | Wellcome Sanger Institute for the COVID-19 Genomics UK (COG-UK) Consortium                                                                                                                                                                                                                                                                                                                                                                                                                                                                                                                                                                                                                     | Jacquelyn Wynn, Mairead Hyland, The Lighthouse Lab in Alderley Park and Alex Alderton, Roberto Amato, Sonia Goncalves, Ewan Harrison, David K. Jackson, Ian Johnston, Dominic Kwiatkowski, Cordelia Langford, John Sillitoe on behalf of the Wellcome Sanger Institute COVID-19 Surveillance Team ( <a href="http://www.sanger.ac.uk/covid-team">http://www.sanger.ac.uk/covid-team</a> )                                                                                                                                                                                                                                                                                                      |
| EPH_ISL_649493                                                                                                                                                                                                                                                                                                                                                                                                                                                                                                                                                                                                                                                                                                                                                                                                                                                                                                                                                                                                                                                                                                                                                                                                                                                                                                                                                                                                                                                                                                                                                                                                                                                                                                                                                                                                                                                                                                                                                                                                                                                                                                                                                                                                                                                                                                                                                                                                                                                                                                                                                                                                                                                                                                                                                                                                                                                                                                                                                                                                                                                                                                                                                                                                                                                                                                                                                                                                                                                                                                                                                                                                                                 | Lighthouse Lab in Cambridge                                                    | Wellcome Sanger Institute for the COVID-19 Genomics UK (COG-UK) Consortium                                                                                                                                                                                                                                                                                                                                                                                                                                                                                                                                                                                                                     | Rob Howes, The Lighthouse Lab in Cambridge and Alex Alderton, Roberto Amato, Sonia Goncalves, Ewan Harrison, David K. Jackson, Ian Johnston, Dominic Kwiatkowski, Cordelia Langford, John Sillitoe on behalf of the Wellcome Sanger Institute COVID-19 Surveillance Team ( <a href="http://www.sanger.ac.uk/covid-team">http://www.sanger.ac.uk/covid-team</a> )                                                                                                                                                                                                                                                                                                                               |
| EPH_ISL_649494, EPH_ISL_649495, EPH_ISL_649501, EPH_ISL_649504, EPH_ISL_649506, EPH_ISL_649507, EPH_ISL_649509, EPH_ISL_649511, EPH_ISL_649515, EPH_ISL_649517, EPH_ISL_649518, EPH_ISL_649522, EPH_ISL_649526, EPH_ISL_649527, EPH_ISL_649528, EPH_ISL_649530, EPH_ISL_649533, EPH_ISL_649534, EPH_ISL_649536, EPH_ISL_649539, EPH_ISL_649540, EPH_ISL_649542, EPH_ISL_649543, EPH_ISL_649546                                                                                                                                                                                                                                                                                                                                                                                                                                                                                                                                                                                                                                                                                                                                                                                                                                                                                                                                                                                                                                                                                                                                                                                                                                                                                                                                                                                                                                                                                                                                                                                                                                                                                                                                                                                                                                                                                                                                                                                                                                                                                                                                                                                                                                                                                                                                                                                                                                                                                                                                                                                                                                                                                                                                                                                                                                                                                                                                                                                                                                                                                                                                                                                                                                                 | Lighthouse Lab in Glasgow                                                      | Wellcome Sanger Institute for the COVID-19 Genomics UK (COG-UK) Consortium                                                                                                                                                                                                                                                                                                                                                                                                                                                                                                                                                                                                                     | Harper VanSteenehouse, Yurni Kasai, David Gray, Carol Clugston, Anna Dominiczak and Alex Alderton, Roberto Amato, Sonia Goncalves, Ewan Harrison, David K. Jackson, Ian Johnston, Dominic Kwiatkowski, Cordelia Langford, John Sillitoe on behalf of the Wellcome Sanger Institute COVID-19 Surveillance Team ( <a href="http://www.sanger.ac.uk/covid-team">http://www.sanger.ac.uk/covid-team</a> )                                                                                                                                                                                                                                                                                          |
| see above                                                                                                                                                                                                                                                                                                                                                                                                                                                                                                                                                                                                                                                                                                                                                                                                                                                                                                                                                                                                                                                                                                                                                                                                                                                                                                                                                                                                                                                                                                                                                                                                                                                                                                                                                                                                                                                                                                                                                                                                                                                                                                                                                                                                                                                                                                                                                                                                                                                                                                                                                                                                                                                                                                                                                                                                                                                                                                                                                                                                                                                                                                                                                                                                                                                                                                                                                                                                                                                                                                                                                                                                                                      | Lighthouse Lab in Glasgow                                                      | Wellcome Sanger Institute for the COVID-19 Genomics UK (COG-UK) Consortium                                                                                                                                                                                                                                                                                                                                                                                                                                                                                                                                                                                                                     | Harper VanSteenehouse, Yurni Kasai, David Gray, Carol Clugston, Anna Dominiczak and Alex Alderton, Roberto Amato, Sonia Goncalves, Ewan Harrison, David K. Jackson, Ian Johnston, Dominic Kwiatkowski, Cordelia Langford, John Sillitoe on behalf of the Wellcome Sanger Institute COVID-19 Surveillance Team ( <a href="http://www.sanger.ac.uk/covid-team">http://www.sanger.ac.uk/covid-team</a> )                                                                                                                                                                                                                                                                                          |
| EPH_ISL_649551, EPH_ISL_649553                                                                                                                                                                                                                                                                                                                                                                                                                                                                                                                                                                                                                                                                                                                                                                                                                                                                                                                                                                                                                                                                                                                                                                                                                                                                                                                                                                                                                                                                                                                                                                                                                                                                                                                                                                                                                                                                                                                                                                                                                                                                                                                                                                                                                                                                                                                                                                                                                                                                                                                                                                                                                                                                                                                                                                                                                                                                                                                                                                                                                                                                                                                                                                                                                                                                                                                                                                                                                                                                                                                                                                                                                 | Lighthouse Lab in Milton Keynes                                                | Wellcome Sanger Institute for the COVID-19 Genomics UK (COG-UK) Consortium                                                                                                                                                                                                                                                                                                                                                                                                                                                                                                                                                                                                                     | The Lighthouse Lab in Milton Keynes and Alex Alderton, Roberto Amato, Sonia Goncalves, Ewan Harrison, David K. Jackson, Ian Johnston, Dominic Kwiatkowski, Cordelia Langford, John Sillitoe on behalf of the Wellcome Sanger Institute COVID-19 Surveillance Team ( <a href="http://www.sanger.ac.uk/covid-team">http://www.sanger.ac.uk/covid-team</a> )                                                                                                                                                                                                                                                                                                                                      |
| EPH_ISL_649557, EPH_ISL_649559, EPH_ISL_649560, EPH_ISL_649561, EPH_ISL_649562, EPH_ISL_649563, EPH_ISL_649564, EPH_ISL_649567, EPH_ISL_649569, EPH_ISL_649571, EPH_ISL_649572, EPH_ISL_649575, EPH_ISL_649577, EPH_ISL_649578, EPH_ISL_649581, EPH_ISL_649582, EPH_ISL_649583, EPH_ISL_649584, EPH_ISL_649585, EPH_ISL_649586, EPH_ISL_649587, EPH_ISL_649588, EPH_ISL_649589, EPH_ISL_649590, EPH_ISL_649591, EPH_ISL_649592, EPH_ISL_649593, EPH_ISL_649594, EPH_ISL_649595, EPH_ISL_649596, EPH_ISL_649597, EPH_ISL_649598, EPH_ISL_649599, EPH_ISL_649600, EPH_ISL_649601, EPH_ISL_649604, EPH_ISL_649607, EPH_ISL_649610, EPH_ISL_649611, EPH_ISL_649612, EPH_ISL_649614, EPH_ISL_649615, EPH_ISL_649616, EPH_ISL_649617, EPH_ISL_649618, EPH_ISL_649619                                                                                                                                                                                                                                                                                                                                                                                                                                                                                                                                                                                                                                                                                                                                                                                                                                                                                                                                                                                                                                                                                                                                                                                                                                                                                                                                                                                                                                                                                                                                                                                                                                                                                                                                                                                                                                                                                                                                                                                                                                                                                                                                                                                                                                                                                                                                                                                                                                                                                                                                                                                                                                                                                                                                                                                                                                                                                 | Lighthouse Lab in Glasgow                                                      | Wellcome Sanger Institute for the COVID-19 Genomics UK (COG-UK) Consortium                                                                                                                                                                                                                                                                                                                                                                                                                                                                                                                                                                                                                     | Harper VanSteenehouse, Yurni Kasai, David Gray, Carol Clugston, Anna Dominiczak and Alex Alderton, Roberto Amato, Sonia Goncalves, Ewan Harrison, David K. Jackson, Ian Johnston, Dominic Kwiatkowski, Cordelia Langford, John Sillitoe on behalf of the Wellcome Sanger Institute COVID-19 Surveillance Team ( <a href="http://www.sanger.ac.uk/covid-team">http://www.sanger.ac.uk/covid-team</a> )                                                                                                                                                                                                                                                                                          |
| see above                                                                                                                                                                                                                                                                                                                                                                                                                                                                                                                                                                                                                                                                                                                                                                                                                                                                                                                                                                                                                                                                                                                                                                                                                                                                                                                                                                                                                                                                                                                                                                                                                                                                                                                                                                                                                                                                                                                                                                                                                                                                                                                                                                                                                                                                                                                                                                                                                                                                                                                                                                                                                                                                                                                                                                                                                                                                                                                                                                                                                                                                                                                                                                                                                                                                                                                                                                                                                                                                                                                                                                                                                                      | Lighthouse Lab in Glasgow                                                      | Wellcome Sanger Institute for the COVID-19 Genomics UK (COG-UK) Consortium                                                                                                                                                                                                                                                                                                                                                                                                                                                                                                                                                                                                                     | Harper VanSteenehouse, Yurni Kasai, David Gray, Carol Clugston, Anna Dominiczak and Alex Alderton, Roberto Amato, Sonia Goncalves, Ewan Harrison, David K. Jackson, Ian Johnston, Dominic Kwiatkowski, Cordelia Langford, John Sillitoe on behalf of the Wellcome Sanger Institute COVID-19 Surveillance Team ( <a href="http://www.sanger.ac.uk/covid-team">http://www.sanger.ac.uk/covid-team</a> )                                                                                                                                                                                                                                                                                          |
| EPH_ISL_649631, EPH_ISL_649633                                                                                                                                                                                                                                                                                                                                                                                                                                                                                                                                                                                                                                                                                                                                                                                                                                                                                                                                                                                                                                                                                                                                                                                                                                                                                                                                                                                                                                                                                                                                                                                                                                                                                                                                                                                                                                                                                                                                                                                                                                                                                                                                                                                                                                                                                                                                                                                                                                                                                                                                                                                                                                                                                                                                                                                                                                                                                                                                                                                                                                                                                                                                                                                                                                                                                                                                                                                                                                                                                                                                                                                                                 | Lighthouse Lab in Cambridge                                                    | Wellcome Sanger Institute for the COVID-19 Genomics UK (COG-UK) Consortium                                                                                                                                                                                                                                                                                                                                                                                                                                                                                                                                                                                                                     | Rob Howes, The Lighthouse Lab in Cambridge and Alex Alderton, Roberto Amato, Sonia Goncalves, Ewan Harrison, David K. Jackson, Ian Johnston, Dominic Kwiatkowski, Cordelia Langford, John Sillitoe on behalf of the Wellcome Sanger Institute COVID-19 Surveillance Team ( <a href="http://www.sanger.ac.uk/covid-team">http://www.sanger.ac.uk/covid-team</a> )                                                                                                                                                                                                                                                                                                                               |
| EPH_ISL_649635, EPH_ISL_649636, EPH_ISL_649637, EPH_ISL_649638, EPH_ISL_649642, EPH_ISL_649644, EPH_ISL_649649, EPH_ISL_649650, EPH_ISL_649654, EPH_ISL_649655, EPH_ISL_649656, EPH_ISL_649657, EPH_ISL_649658, EPH_ISL_649660, EPH_ISL_649662, EPH_ISL_649663, EPH_ISL_649664, EPH_ISL_649665, EPH_ISL_649666, EPH_ISL_649667, EPH_ISL_649670, EPH_ISL_649672, EPH_ISL_649673, EPH_ISL_649674, EPH_ISL_649675, EPH_ISL_649676, EPH_ISL_649677, EPH_ISL_649678, EPH_ISL_649679, EPH_ISL_649680, EPH_ISL_649682, EPH_ISL_649684, EPH_ISL_649686, EPH_ISL_649688, EPH_ISL_649689, EPH_ISL_649692, EPH_ISL_649694, EPH_ISL_649696, EPH_ISL_649697, EPH_ISL_649698, EPH_ISL_649700, EPH_ISL_649702, EPH_ISL_649703, EPH_ISL_649704, EPH_ISL_649706, EPH_ISL_649707, EPH_ISL_649708, EPH_ISL_649710, EPH_ISL_649711, EPH_ISL_649713, EPH_ISL_649713, EPH_ISL_649714, EPH_ISL_649715, EPH_ISL_649716, EPH_ISL_649718, EPH_ISL_649720, EPH_ISL_649723, EPH_ISL_649724, EPH_ISL_649725, EPH_ISL_649726, EPH_ISL_649727, EPH_ISL_649728, EPH_ISL_649729, EPH_ISL_649730, EPH_ISL_649731, EPH_ISL_649732, EPH_ISL_649733, EPH_ISL_649735, EPH_ISL_649736, EPH_ISL_649740, EPH_ISL_649742, EPH_ISL_649745, EPH_ISL_649750, EPH_ISL_649754, EPH_ISL_649757, EPH_ISL_649758, EPH_ISL_649759, EPH_ISL_649760, EPH_ISL_649764, EPH_ISL_649765, EPH_ISL_649767, EPH_ISL_649768, EPH_ISL_649771, EPH_ISL_649774, EPH_ISL_649776, EPH_ISL_649777, EPH_ISL_649780, EPH_ISL_649782                                                                                                                                                                                                                                                                                                                                                                                                                                                                                                                                                                                                                                                                                                                                                                                                                                                                                                                                                                                                                                                                                                                                                                                                                                                                                                                                                                                                                                                                                                                                                                                                                                                                                                                                                                                                                                                                                                                                                                                                                                                                                                                                                                                 | Lighthouse Lab in Glasgow                                                      | Wellcome Sanger Institute for the COVID-19 Genomics UK (COG-UK) Consortium                                                                                                                                                                                                                                                                                                                                                                                                                                                                                                                                                                                                                     | Harper VanSteenehouse, Yurni Kasai, David Gray, Carol Clugston, Anna Dominiczak and Alex Alderton, Roberto Amato, Sonia Goncalves, Ewan Harrison, David K. Jackson, Ian Johnston, Dominic Kwiatkowski, Cordelia Langford, John Sillitoe on behalf of the Wellcome Sanger Institute COVID-19 Surveillance Team ( <a href="http://www.sanger.ac.uk/covid-team">http://www.sanger.ac.uk/covid-team</a> )                                                                                                                                                                                                                                                                                          |
| see above                                                                                                                                                                                                                                                                                                                                                                                                                                                                                                                                                                                                                                                                                                                                                                                                                                                                                                                                                                                                                                                                                                                                                                                                                                                                                                                                                                                                                                                                                                                                                                                                                                                                                                                                                                                                                                                                                                                                                                                                                                                                                                                                                                                                                                                                                                                                                                                                                                                                                                                                                                                                                                                                                                                                                                                                                                                                                                                                                                                                                                                                                                                                                                                                                                                                                                                                                                                                                                                                                                                                                                                                                                      | Lighthouse Lab in Glasgow                                                      | Wellcome Sanger Institute for the COVID-19 Genomics UK (COG-UK) Consortium                                                                                                                                                                                                                                                                                                                                                                                                                                                                                                                                                                                                                     | Harper VanSteenehouse, Yurni Kasai, David Gray, Carol Clugston, Anna Dominiczak and Alex Alderton, Roberto Amato, Sonia Goncalves, Ewan Harrison, David K. Jackson, Ian Johnston, Dominic Kwiatkowski, Cordelia Langford, John Sillitoe on behalf of the Wellcome Sanger Institute COVID-19 Surveillance Team ( <a href="http://www.sanger.ac.uk/covid-team">http://www.sanger.ac.uk/covid-team</a> )                                                                                                                                                                                                                                                                                          |
| EPH_ISL_649786, EPH_ISL_649787, EPH_ISL_649788, EPH_ISL_649789, EPH_ISL_649790, EPH_ISL_649792, EPH_ISL_649793, EPH_ISL_649794, EPH_ISL_649795, EPH_ISL_649796, EPH_ISL_649797, EPH_ISL_649798, EPH_ISL_649799, EPH_ISL_649800, EPH_ISL_649801, EPH_ISL_649802, EPH_ISL_649803, EPH_ISL_649804, EPH_ISL_649805, EPH_ISL_649806, EPH_ISL_649807, EPH_ISL_649808, EPH_ISL_649809, EPH_ISL_649810, EPH_ISL_649811, EPH_ISL_649812, EPH_ISL_649813, EPH_ISL_649814, EPH_ISL_649815, EPH_ISL_649816, EPH_ISL_649817, EPH_ISL_649818, EPH_ISL_649819, EPH_ISL_649820, EPH_ISL_649821, EPH_ISL_649822, EPH_ISL_649823, EPH_ISL_649824, EPH_ISL_649825, EPH_ISL_649826, EPH_ISL_649827, EPH_ISL_649828, EPH_ISL_649829, EPH_ISL_649830, EPH_ISL_649831, EPH_ISL_649832, EPH_ISL_649833, EPH_ISL_649834, EPH_ISL_649835, EPH_ISL_649836, EPH_ISL_649837, EPH_ISL_649838, EPH_ISL_649839, EPH_ISL_649840, EPH_ISL_649841, EPH_ISL_649842, EPH_ISL_649843, EPH_ISL_649844, EPH_ISL_649845, EPH_ISL_649846, EPH_ISL_649847, EPH_ISL_649848, EPH_ISL_649849, EPH_ISL_649850, EPH_ISL_649851, EPH_ISL_649852, EPH_ISL_649853, EPH_ISL_649854, EPH_ISL_649855, EPH_ISL_649856, EPH_ISL_649857, EPH_ISL_649858, EPH_ISL_649859, EPH_ISL_649860, EPH_ISL_649861, EPH_ISL_649862, EPH_ISL_649863, EPH_ISL_649864, EPH_ISL_649865, EPH_ISL_649866, EPH_ISL_649867, EPH_ISL_649868, EPH_ISL_649869, EPH_ISL_649870, EPH_ISL_649871, EPH_ISL_649872, EPH_ISL_649873, EPH_ISL_649874, EPH_ISL_649875, EPH_ISL_649876, EPH_ISL_649877, EPH_ISL_649878, EPH_ISL_649879, EPH_ISL_649880, EPH_ISL_649881, EPH_ISL_649882, EPH_ISL_649883, EPH_ISL_649884, EPH_ISL_649885, EPH_ISL_649886, EPH_ISL_649887, EPH_ISL_649888, EPH_ISL_649889, EPH_ISL_649890, EPH_ISL_649891, EPH_ISL_649892, EPH_ISL_649893, EPH_ISL_649894, EPH_ISL_649895, EPH_ISL_649896, EPH_ISL_649897, EPH_ISL_649898, EPH_ISL_649899, EPH_ISL_649900, EPH_ISL_649901, EPH_ISL_649902, EPH_ISL_649903, EPH_ISL_649904, EPH_ISL_649905, EPH_ISL_649906, EPH_ISL_649907, EPH_ISL_649908, EPH_ISL_649909, EPH_ISL_649910, EPH_ISL_649911, EPH_ISL_649915, EPH_ISL_649916, EPH_ISL_649919, EPH_ISL_649920, EPH_ISL_649923, EPH_ISL_649925, EPH_ISL_649926, EPH_ISL_649928, EPH_ISL_649929, EPH_ISL_649930, EPH_ISL_649931, EPH_ISL_649932, EPH_ISL_649934, EPH_ISL_649935                                                                                                                                                                                                                                                                                                                                                                                                                                                                                                                                                                                                                                                                                                                                                                                                                                                                                                                                                                                                                                                                                                                                                                                                                                                                                                                                 | Respiratory Virus Unit, Microbiology Services Colindale, Public Health England | Sam Hadenry, Ania Lucaci, Steve Paterson, Julian Hiscox, Alistair Darty, M. Almeida, A. Alrezkhi, Muhammad Aruwaili, Stuart D Armstrong, Jones Benjamin, Eleanor G Bentley, Anu Charwa, Jordan J Clark, Angela Cowell, Richard Eccles, Isabel Garcia-Dominval, Matthew Cammell, Alessandro Gerada, PFR Gilmore, Richard Gregory, Mingrui Han, Catherine Harrelly, Margaret Hughes, Willem Turza-Gomara, James Johnson, L. Liu, Jennifer Marston, Charlotte Nelson, Elaine O'Riordan, Cassie Olatunji, Rebekah Penrice-Handal, Lucille Randolph, N. P. Randa, Trevor J. Rowlinson, Parul Sharma, Giada T. Shawl, James P Stewart, Neil Swainson, Ecaterina Varnos, Joanne Watts, Mark Whitehead |                                                                                                                                                                                                                                                                                                                                                                                                                                                                                                                                                                                                                                                                                                |
| see above                                                                                                                                                                                                                                                                                                                                                                                                                                                                                                                                                                                                                                                                                                                                                                                                                                                                                                                                                                                                                                                                                                                                                                                                                                                                                                                                                                                                                                                                                                                                                                                                                                                                                                                                                                                                                                                                                                                                                                                                                                                                                                                                                                                                                                                                                                                                                                                                                                                                                                                                                                                                                                                                                                                                                                                                                                                                                                                                                                                                                                                                                                                                                                                                                                                                                                                                                                                                                                                                                                                                                                                                                                      | Respiratory Virus Unit, Microbiology Services Colindale, Public Health England | COVID-19 Genomics UK (COG-UK) Consortium                                                                                                                                                                                                                                                                                                                                                                                                                                                                                                                                                                                                                                                       | Sam Hadenry, Ania Lucaci, Steve Paterson, Julian Hiscox, Alistair Darty, M. Almeida, A. Alrezkhi, Muhammad Aruwaili, Stuart D Armstrong, Jones Benjamin, Eleanor G Bentley, Anu Charwa, Jordan J Clark, Angela Cowell, Richard Eccles, Isabel Garcia-Dominval, Matthew Cammell, Alessandro Gerada, PFR Gilmore, Richard Gregory, Mingrui Han, Catherine Harrelly, Margaret Hughes, Willem Turza-Gomara, James Johnson, L. Liu, Jennifer Marston, Charlotte Nelson, Elaine O'Riordan, Cassie Olatunji, Rebekah Penrice-Handal, Lucille Randolph, N. P. Randa, Trevor J. Rowlinson, Parul Sharma, Giada T. Shawl, James P Stewart, Neil Swainson, Ecaterina Varnos, Joanne Watts, Mark Whitehead |
| EPH_ISL_650112, EPH_ISL_650115                                                                                                                                                                                                                                                                                                                                                                                                                                                                                                                                                                                                                                                                                                                                                                                                                                                                                                                                                                                                                                                                                                                                                                                                                                                                                                                                                                                                                                                                                                                                                                                                                                                                                                                                                                                                                                                                                                                                                                                                                                                                                                                                                                                                                                                                                                                                                                                                                                                                                                                                                                                                                                                                                                                                                                                                                                                                                                                                                                                                                                                                                                                                                                                                                                                                                                                                                                                                                                                                                                                                                                                                                 | Liverpool Clinical Laboratories                                                | COVID-19 Genomics UK (COG-UK) Consortium                                                                                                                                                                                                                                                                                                                                                                                                                                                                                                                                                                                                                                                       | David J. Baker, Gemma L. Kay, Ali Aydin, Thanhi Le-Viet, Steven Rudder, K. A. P. Tedin, Anastasiya Kolyva, Maria Diaz, Leonardo de Oliveira Martins, Nabil-Farzed Alkhan, Lizzie Meadows, Rachael Stanley, Nguzi Eunurojo, Muhammad Yasir, Nicholas M. Thomson, Alexander J. Trotter, Richard Gilroy, Samuel Bloomfield, Claire Stuart, Andrew Bell, Reemeh Prakash, Sami Dervisevic, Alison E. Malher, John Wain, Mark Webber, Andrew J. Page, Justin O'Grady                                                                                                                                                                                                                                 |
| EPH_ISL_650128                                                                                                                                                                                                                                                                                                                                                                                                                                                                                                                                                                                                                                                                                                                                                                                                                                                                                                                                                                                                                                                                                                                                                                                                                                                                                                                                                                                                                                                                                                                                                                                                                                                                                                                                                                                                                                                                                                                                                                                                                                                                                                                                                                                                                                                                                                                                                                                                                                                                                                                                                                                                                                                                                                                                                                                                                                                                                                                                                                                                                                                                                                                                                                                                                                                                                                                                                                                                                                                                                                                                                                                                                                 | Quadram Institute Bioscience                                                   | COVID-19 Genomics UK (COG-UK) Consortium                                                                                                                                                                                                                                                                                                                                                                                                                                                                                                                                                                                                                                                       | David J. Baker, Gemma L. Kay, Ali Aydin, Thanhi Le-Viet, Steven Rudder, K. A. P. Tedin, Anastasiya Kolyva, Maria Diaz, Leonardo de Oliveira Martins, Nabil-Farzed Alkhan, Lizzie Meadows, Rachael Stanley, Nguzi Eunurojo, Muhammad Yasir, Nicholas M. Thomson, Alexander J. Trotter, Richard Gilroy, Samuel Bloomfield, Claire Stuart, Andrew Bell, Reemeh Prakash, Sami Dervisevic, Alison E. Malher, John Wain, Mark Webber, Andrew J. Page, Justin O'Grady                                                                                                                                                                                                                                 |

|                                                                |                                                                                                                                                                                                                                                      |                                          |                                                                                                                                                                                                                                                                                                                                                                                                                                                                                                                                                                                                                                                                                           |
|----------------------------------------------------------------|------------------------------------------------------------------------------------------------------------------------------------------------------------------------------------------------------------------------------------------------------|------------------------------------------|-------------------------------------------------------------------------------------------------------------------------------------------------------------------------------------------------------------------------------------------------------------------------------------------------------------------------------------------------------------------------------------------------------------------------------------------------------------------------------------------------------------------------------------------------------------------------------------------------------------------------------------------------------------------------------------------|
| EPI_ISL_650129                                                 | Department of Pathology, University of Cambridge                                                                                                                                                                                                     | COVID-19 Genomics UK (COG-UK) Consortium | Aminu S. Jahun, Yasmin Chaudhry, Grant Hall, Iliana Georgiana, Myra Hosnilo, Martin D. Curran, Maite Frickert, Surendra Pamar, Ian Goodfellow                                                                                                                                                                                                                                                                                                                                                                                                                                                                                                                                             |
| EPI_ISL_650132                                                 | Liverpool Clinical Laboratories                                                                                                                                                                                                                      | COVID-19 Genomics UK (COG-UK) Consortium | Sam Haldenry, Anila Lucaci, Steve Paterson, Julian Hiscox, Alistair Darty, M. Almsaud, A. Alvezhali, Muhammad Aruwalli, Stuart D Armstrong, Jones Benjamin, Eleanor G Bentley, Anu Chawla, Jordan J Clark, Angela Cowell, Richard Eccles, Isabel Garcia-Dorival, Matthew Gemmill, Alessando Gerada, PFK Gilmore, Richard Gregory, Ximeng Han, Catherine Hartley, Margaret Hughes, Mirren Iurizza-Gomara, James Johnson, L. Liu, Jennifer Manson, Charlotte Nelson, Elaine O'Toole, Cassie Olatelu, Rebekah Penrice-Handel, Lucille Rahnow, N. P. Randle, Trevor Ian Robinson, Paul Sharma, Ghada T Shawli, James P Stewart, Neil Swainston, Ecaterina Varnos, Joanna Vats, Mark Whitehead |
| EPI_ISL_650133                                                 | Department of Pathology, University of Cambridge<br>Virology, Department, Royal Infirmary of Edinburgh, NHS Lothian / School of Biological Sciences, University of Edinburgh / Institute of Genetics and Molecular Medicine, University of Edinburgh | COVID-19 Genomics UK (COG-UK) Consortium | Aminu S. Jahun, Yasmin Chaudhry, Grant Hall, Iliana Georgiana, Myra Hosnilo, Martin D. Curran, Maite Frickert, Surendra Pamar, Ian Goodfellow                                                                                                                                                                                                                                                                                                                                                                                                                                                                                                                                             |
| EPI_ISL_650136                                                 | Queens Medical Centre, Clinical Microbiology Department / Deepseq Nottingham                                                                                                                                                                         | COVID-19 Genomics UK (COG-UK) Consortium | Gamma Clark, Wendy Smith, Manjinder Khatn, Vikki M Fleming, Michelle M. Lister, Hannah Howson-Wells, Jonathan Ball, Patrick McCuire, Joseph Chappell, Theodoranis Tsaldaris, Nadine Holmes, Matthew Carlisle, Christopher Moore, Fai Sang, Johnny Debebe, Victoria Wright, Matthew Loose                                                                                                                                                                                                                                                                                                                                                                                                  |
| EPI_ISL_650137                                                 | University of Birmingham                                                                                                                                                                                                                             | COVID-19 Genomics UK (COG-UK) Consortium | Institute of Microbiology, University of Birmingham, Claire McLuray, Joanne Stockton, Samuel Nicholas, Radoslaw Poplawski, Will Rowe, Josh Quick, Nicholas Loman, University of Birmingham Testing Laboratory, Celina M Whalley, Andrew Bosworth, Charlotte Poxon, Kasun Wangasingaya, Oliver Pickles, Mike Kidd, Alex Richter, Andrew D Beggs PHE Heartlands Lab, Husam Osman, Andrew Bosworth, Queen Elizabeth Hospital, Anna Casey                                                                                                                                                                                                                                                     |
| EPI_ISL_650139, EPI_ISL_650140                                 | Liverpool Clinical Laboratories                                                                                                                                                                                                                      | COVID-19 Genomics UK (COG-UK) Consortium | Sam Haldenry, Anila Lucaci, Steve Paterson, Julian Hiscox, Alistair Darty, M. Almsaud, A. Alvezhali, Muhammad Aruwalli, Stuart D Armstrong, Jones Benjamin, Eleanor G Bentley, Anu Chawla, Jordan J Clark, Angela Cowell, Richard Eccles, Isabel Garcia-Dorival, Matthew Gemmill, Alessando Gerada, PFK Gilmore, Richard Gregory, Ximeng Han, Catherine Hartley, Margaret Hughes, Mirren Iurizza-Gomara, James Johnson, L. Liu, Jennifer Manson, Charlotte Nelson, Elaine O'Toole, Cassie Olatelu, Rebekah Penrice-Handel, Lucille Rahnow, N. P. Randle, Trevor Ian Robinson, Paul Sharma, Ghada T Shawli, James P Stewart, Neil Swainston, Ecaterina Varnos, Joanna Vats, Mark Whitehead |
| EPI_ISL_650146                                                 | West of Scotland Specialist Virology Centre, NHS SGCG / MRC-University of Glasgow Centre for Virus Research                                                                                                                                          | COVID-19 Genomics UK (COG-UK) Consortium | Ana da Silva Filipe, Natasha Johnson, Kathy Smollett, Danielle Mair, Stephen Carmichael, Alice Pross, Lily Tong, Jenna Nichols, Yriaki Nonioku, Sarah McDonald, Richard Oron, Joseph Hughes, Steenu Vaidipally, David L Robertson, Alasdair Maclean, Roy Gunson, Sharif Shaaban, Matthew Holden, Rachel Blacow, Guy Mollitt, Kathy Li, James Shepherd, Antonia Ho, Emma Thomson                                                                                                                                                                                                                                                                                                           |
| EPI_ISL_650148                                                 | West of Scotland Specialist Virology Centre, NHS SGCG / MRC-University of Glasgow Centre for Virus Research                                                                                                                                          | COVID-19 Genomics UK (COG-UK) Consortium | McHugh M, Dewar R, Rooke S, Gallagher M, Balcaza C, O'Toole A, Scher E, Hill V, McCrone JT, Colquhoun R, Yu X, Jackson B, Rambaut A, Williams TC, Templeton K                                                                                                                                                                                                                                                                                                                                                                                                                                                                                                                             |
| EPI_ISL_650152                                                 | Virology, Department, Royal Infirmary of Edinburgh, NHS Lothian / School of Biological Sciences, University of Edinburgh / Institute of Genetics and Molecular Medicine, University of Edinburgh                                                     | COVID-19 Genomics UK (COG-UK) Consortium | McHugh M, Dewar R, Rooke S, Gallagher M, Balcaza C, O'Toole A, Scher E, Hill V, McCrone JT, Colquhoun R, Yu X, Jackson B, Rambaut A, Williams TC, Templeton K                                                                                                                                                                                                                                                                                                                                                                                                                                                                                                                             |
| EPI_ISL_650154, EPI_ISL_650157                                 | Queens Medical Centre, Clinical Microbiology Department / Deepseq Nottingham                                                                                                                                                                         | COVID-19 Genomics UK (COG-UK) Consortium | Gamma Clark, Wendy Smith, Manjinder Khatn, Vikki M Fleming, Michelle M. Lister, Hannah Howson-Wells, Jonathan Ball, Patrick McCuire, Joseph Chappell, Theodoranis Tsaldaris, Nadine Holmes, Matthew Carlisle, Christopher Moore, Fai Sang, Johnny Debebe, Victoria Wright, Matthew Loose                                                                                                                                                                                                                                                                                                                                                                                                  |
| EPI_ISL_650158                                                 | University of Birmingham                                                                                                                                                                                                                             | COVID-19 Genomics UK (COG-UK) Consortium | Institute of Microbiology, University of Birmingham, Claire McLuray, Joanne Stockton, Samuel Nicholas, Radoslaw Poplawski, Will Rowe, Josh Quick, Nicholas Loman, University of Birmingham Testing Laboratory, Celina M Whalley, Andrew Bosworth, Charlotte Poxon, Kasun Wangasingaya, Oliver Pickles, Mike Kidd, Alex Richter, Andrew D Beggs PHE Heartlands Lab, Husam Osman, Andrew Bosworth, Queen Elizabeth Hospital, Anna Casey                                                                                                                                                                                                                                                     |
| EPI_ISL_650159                                                 | Virology, Department, Royal Infirmary of Edinburgh, NHS Lothian / School of Biological Sciences, University of Edinburgh / Institute of Genetics and Molecular Medicine, University of Edinburgh                                                     | COVID-19 Genomics UK (COG-UK) Consortium | McHugh M, Dewar R, Rooke S, Gallagher M, Balcaza C, O'Toole A, Scher E, Hill V, McCrone JT, Colquhoun R, Yu X, Jackson B, Rambaut A, Williams TC, Templeton K                                                                                                                                                                                                                                                                                                                                                                                                                                                                                                                             |
| EPI_ISL_650162                                                 | Liverpool Clinical Laboratories                                                                                                                                                                                                                      | COVID-19 Genomics UK (COG-UK) Consortium | Sam Haldenry, Anila Lucaci, Steve Paterson, Julian Hiscox, Alistair Darty, M. Almsaud, A. Alvezhali, Muhammad Aruwalli, Stuart D Armstrong, Jones Benjamin, Eleanor G Bentley, Anu Chawla, Jordan J Clark, Angela Cowell, Richard Eccles, Isabel Garcia-Dorival, Matthew Gemmill, Alessando Gerada, PFK Gilmore, Richard Gregory, Ximeng Han, Catherine Hartley, Margaret Hughes, Mirren Iurizza-Gomara, James Johnson, L. Liu, Jennifer Manson, Charlotte Nelson, Elaine O'Toole, Cassie Olatelu, Rebekah Penrice-Handel, Lucille Rahnow, N. P. Randle, Trevor Ian Robinson, Paul Sharma, Ghada T Shawli, James P Stewart, Neil Swainston, Ecaterina Varnos, Joanna Vats, Mark Whitehead |
| EPI_ISL_650165                                                 | Virology, Department, Royal Infirmary of Edinburgh, NHS Lothian / School of Biological Sciences, University of Edinburgh / Institute of Genetics and Molecular Medicine, University of Edinburgh                                                     | COVID-19 Genomics UK (COG-UK) Consortium | McHugh M, Dewar R, Rooke S, Gallagher M, Balcaza C, O'Toole A, Scher E, Hill V, McCrone JT, Colquhoun R, Yu X, Jackson B, Rambaut A, Williams TC, Templeton K                                                                                                                                                                                                                                                                                                                                                                                                                                                                                                                             |
| EPI_ISL_650172                                                 | University of Birmingham                                                                                                                                                                                                                             | COVID-19 Genomics UK (COG-UK) Consortium | Institute of Microbiology, University of Birmingham, Claire McLuray, Joanne Stockton, Samuel Nicholas, Radoslaw Poplawski, Will Rowe, Josh Quick, Nicholas Loman, University of Birmingham Testing Laboratory, Celina M Whalley, Andrew Bosworth, Charlotte Poxon, Kasun Wangasingaya, Oliver Pickles, Mike Kidd, Alex Richter, Andrew D Beggs PHE Heartlands Lab, Husam Osman, Andrew Bosworth, Queen Elizabeth Hospital, Anna Casey                                                                                                                                                                                                                                                     |
| EPI_ISL_650173                                                 | Virology, Department, Royal Infirmary of Edinburgh, NHS Lothian / School of Biological Sciences, University of Edinburgh / Institute of Genetics and Molecular Medicine, University of Edinburgh                                                     | COVID-19 Genomics UK (COG-UK) Consortium | McHugh M, Dewar R, Rooke S, Gallagher M, Balcaza C, O'Toole A, Scher E, Hill V, McCrone JT, Colquhoun R, Yu X, Jackson B, Rambaut A, Williams TC, Templeton K                                                                                                                                                                                                                                                                                                                                                                                                                                                                                                                             |
| EPI_ISL_650174                                                 | Quadram Institute Bioscience                                                                                                                                                                                                                         | COVID-19 Genomics UK (COG-UK) Consortium | Dave J Baker, Gamma L Kay, Abi Aydin, Thanh Le-Viet, Steven Rudder, Ana P. Tedin, Anastasia Kolyva, Maria Diaz, Leonardo de Oliveira Martins, Nabil-Faried Alkhrtn, Lezle Meadows, Rachael Stanley, Ngyzi Elnungo, Muhammad Yasir, Nicholas M, Thomson, Alexander J Trotter, Rachel Gilroy, Samuel Bloomfield, Claire Stuart, Andrew Bell, Fehreiss Frakasi, Sami Dervisevic, Alison E. Mahner, John Vaini, Mark Webber, Andrew J. Page, Justin O'Grady                                                                                                                                                                                                                                   |
| EPI_ISL_650179, EPI_ISL_650180, EPI_ISL_650182                 | Virology, Department, Royal Infirmary of Edinburgh, NHS Lothian / School of Biological Sciences, University of Edinburgh / Institute of Genetics and Molecular Medicine, University of Edinburgh                                                     | COVID-19 Genomics UK (COG-UK) Consortium | McHugh M, Dewar R, Rooke S, Gallagher M, Balcaza C, O'Toole A, Scher E, Hill V, McCrone JT, Colquhoun R, Yu X, Jackson B, Rambaut A, Williams TC, Templeton K                                                                                                                                                                                                                                                                                                                                                                                                                                                                                                                             |
| EPI_ISL_650183, EPI_ISL_650184                                 | Liverpool Clinical Laboratories                                                                                                                                                                                                                      | COVID-19 Genomics UK (COG-UK) Consortium | Sam Haldenry, Anila Lucaci, Steve Paterson, Julian Hiscox, Alistair Darty, M. Almsaud, A. Alvezhali, Muhammad Aruwalli, Stuart D Armstrong, Jones Benjamin, Eleanor G Bentley, Anu Chawla, Jordan J Clark, Angela Cowell, Richard Eccles, Isabel Garcia-Dorival, Matthew Gemmill, Alessando Gerada, PFK Gilmore, Richard Gregory, Ximeng Han, Catherine Hartley, Margaret Hughes, Mirren Iurizza-Gomara, James Johnson, L. Liu, Jennifer Manson, Charlotte Nelson, Elaine O'Toole, Cassie Olatelu, Rebekah Penrice-Handel, Lucille Rahnow, N. P. Randle, Trevor Ian Robinson, Paul Sharma, Ghada T Shawli, James P Stewart, Neil Swainston, Ecaterina Varnos, Joanna Vats, Mark Whitehead |
| EPI_ISL_650186, EPI_ISL_650187                                 | Queens Medical Centre, Clinical Microbiology Department / Deepseq Nottingham                                                                                                                                                                         | COVID-19 Genomics UK (COG-UK) Consortium | Gamma Clark, Wendy Smith, Manjinder Khatn, Vikki M Fleming, Michelle M. Lister, Hannah Howson-Wells, Jonathan Ball, Patrick McCuire, Joseph Chappell, Theodoranis Tsaldaris, Nadine Holmes, Matthew Carlisle, Christopher Moore, Fai Sang, Johnny Debebe, Victoria Wright, Matthew Loose                                                                                                                                                                                                                                                                                                                                                                                                  |
| EPI_ISL_650192, EPI_ISL_650194, EPI_ISL_650199, EPI_ISL_650203 | Liverpool Clinical Laboratories                                                                                                                                                                                                                      | COVID-19 Genomics UK (COG-UK) Consortium | Sam Haldenry, Anila Lucaci, Steve Paterson, Julian Hiscox, Alistair Darty, M. Almsaud, A. Alvezhali, Muhammad Aruwalli, Stuart D Armstrong, Jones Benjamin, Eleanor G Bentley, Anu Chawla, Jordan J Clark, Angela Cowell, Richard Eccles, Isabel Garcia-Dorival, Matthew Gemmill, Alessando Gerada, PFK Gilmore, Richard Gregory, Ximeng Han, Catherine Hartley, Margaret Hughes, Mirren Iurizza-Gomara, James Johnson, L. Liu, Jennifer Manson, Charlotte Nelson, Elaine O'Toole, Cassie Olatelu, Rebekah Penrice-Handel, Lucille Rahnow, N. P. Randle, Trevor Ian Robinson, Paul Sharma, Ghada T Shawli, James P Stewart, Neil Swainston, Ecaterina Varnos, Joanna Vats, Mark Whitehead |
| EPI_ISL_650204                                                 | Wales Specialist Virology Centre Sequencing lab: Pathogen Genomics Unit                                                                                                                                                                              | COVID-19 Genomics UK (COG-UK) Consortium | Catherine Moore, Jonathan Evans, Laura Gifford, Malorie Parry, Simon Cottell, Angela Marchbank, Alec Birchley, Alexander Adams, Amy Gaslin, Bre Gatica-Vilcox, Jason Coombes, Joel Scudgater, Lauren Gilbert, Lee Graham, Nicole Rechnerin, Sara Kutzner-Summenhayes, Sarah Taylor, Sophie Jones, Sara Hey, Matthew Bull, Joanne Watkins, Sally Corden, Tom Connor                                                                                                                                                                                                                                                                                                                        |

|                                |                                                                                                                                                                                                 |                                          |                                                                                                                                                                                                                                                                                                                                                                                                                                                                                                                                                                                                                                                                                       |
|--------------------------------|-------------------------------------------------------------------------------------------------------------------------------------------------------------------------------------------------|------------------------------------------|---------------------------------------------------------------------------------------------------------------------------------------------------------------------------------------------------------------------------------------------------------------------------------------------------------------------------------------------------------------------------------------------------------------------------------------------------------------------------------------------------------------------------------------------------------------------------------------------------------------------------------------------------------------------------------------|
| EPI_ISL_650205                 | Liverpool Clinical Laboratories                                                                                                                                                                 | COVID-19 Genomics UK (COG-UK) Consortium | Sam Haldeney, Anita Luciad, Steve Paterson, Julian Hiscox, Alistair Darby, M Almsaud, A Alvezalhi, Muhammad Aruwalli, Stuart D Armstrong, Jones Benjamin, Eleanor G Bentley, Anu Chawla, Jordan J Clark, Angela Cowell, Richard Eccles, Isabel Garcia-Dorival, Matthew Gemmill, Alessando Gerada, PFR Gilmore, Richard Gregory, Ximeng Han, Catherine Hartley, Margaret Hughes, Mirren Iurriza-Gomara, James Johnson, L Liu, Jennifer Manson, Charlotte Nelson, Elaine O'Toole, Cassie Olatelu, Rebekah Penrice-Handel, Lucille Ranboux, N P Randle, Trevor Ian Robinson, Parul Sharma, Ghada T Shawli, James P Stewart, Neil Swanston, Ecaterina Varnos, Joanna Wats, Mark Whitehead |
| EPI_ISL_650206                 | Wales Specialist Virology Centre Sequencing lab: Pathogen Genomics Unit                                                                                                                         | COVID-19 Genomics UK (COG-UK) Consortium | Catherine Moore, Johnathan Evans, Laura Gifford, Malorie Perry, Simon Cottrell, Angela Marchbank, Alec Birchley, Alexander Adams, Amy Gaslin, Bree Gatica-Wilcox, Jason Coombes, Joel Soutgiate, Lauren Gilbert, Lee Graham, Nicole Frachonni, Sara Kunzraber-Summerhayes, Sarah Taylor, Sophie Jones, Sara Hey, Matthew Bull, Joanne Watkins, Sally Corden, Tom Connor                                                                                                                                                                                                                                                                                                               |
| EPI_ISL_650211                 | Quadram Institute Bioscience                                                                                                                                                                    | COVID-19 Genomics UK (COG-UK) Consortium | Dave J Baker, Gemma L Kay, Ali Aydin, Thanh Le-Viet, Steven Rudder, Ana P. Tedim, Anastasi Kolyva, Maria Diaz, Leonardo de Oliveira Martins, Nabil-Farzed Alkhani, Lizzie Meadows, Rachael Stanley, Nqoziso Eunurogo, Mubammad Yasar, Nicholas M. Thomson, Alexander J Trotter, Rachael Gilroy, Samuel Bloomfield, Claire Sturt, Andrew Bell, Reemesh Prakash, Sami Derisovic, Alison E. Malher, John Vain, Mark Webber, Andrew J Page, Justin O'Grady                                                                                                                                                                                                                                |
| EPI_ISL_650212                 | University of Birmingham                                                                                                                                                                        | COVID-19 Genomics UK (COG-UK) Consortium | Institute of Microbiology, University of Birmingham, Claire McMurray, Joanne Stockton, Samuel Nicholas, Radoslaw Poplawski, Will Rowe, Josh Quick, Nicholas Loman, University of Birmingham Testing Laboratory, Celina M Whalley, Andrew Bosworth, Charlotte Poxon, Kasun Wangasooriya, Oliver Pickles, Mike Kidd, Alex Richter, Andrew D Beggs PHE Heartlands Lab, Husam Osman, Andrew Bosworth, Queen Elizabeth Hospital, Anna Casey                                                                                                                                                                                                                                                |
| EPI_ISL_650213                 | Wales Specialist Virology Centre Sequencing lab: Pathogen Genomics Unit                                                                                                                         | COVID-19 Genomics UK (COG-UK) Consortium | Catherine Moore, Johnathan Evans, Laura Gifford, Malorie Perry, Simon Cottrell, Angela Marchbank, Alec Birchley, Alexander Adams, Amy Gaslin, Bree Gatica-Wilcox, Jason Coombes, Joel Soutgiate, Lauren Gilbert, Lee Graham, Nicole Frachonni, Sara Kunzraber-Summerhayes, Sarah Taylor, Sophie Jones, Sara Hey, Matthew Bull, Joanne Watkins, Sally Corden, Tom Connor                                                                                                                                                                                                                                                                                                               |
| EPI_ISL_650216                 | University of Birmingham                                                                                                                                                                        | COVID-19 Genomics UK (COG-UK) Consortium | Institute of Microbiology, University of Birmingham, Claire McMurray, Joanne Stockton, Samuel Nicholas, Radoslaw Poplawski, Will Rowe, Josh Quick, Nicholas Loman, University of Birmingham Testing Laboratory, Celina M Whalley, Andrew Bosworth, Charlotte Poxon, Kasun Wangasooriya, Oliver Pickles, Mike Kidd, Alex Richter, Andrew D Beggs PHE Heartlands Lab, Husam Osman, Andrew Bosworth, Queen Elizabeth Hospital, Anna Casey                                                                                                                                                                                                                                                |
| EPI_ISL_650219                 | University of Exeter                                                                                                                                                                            | COVID-19 Genomics UK (COG-UK) Consortium | Ban Temperton, Aaron Jeffries, Michelle Michelsen, Joama Warwick-Dugdale, Audrey Febos, Robyn Manley, Stephen Mitchell, Jane Masoli                                                                                                                                                                                                                                                                                                                                                                                                                                                                                                                                                   |
| EPI_ISL_650220                 | Virology Department, Royal Infirmary of Edinburgh, NHS Lothian / School of Biological Sciences, University of Edinburgh / Institute of Genetics and Molecular Medicine, University of Edinburgh | COVID-19 Genomics UK (COG-UK) Consortium | Darren L Smith, Andrew Nelson, Matthew Bastion, Greg R Young, Joshua Loh, John Allan, Mohammad A Tariq, Giles S Holt, Gary Black, Wen C Yew, Lynn Dover, Paul Baker, Steve Liggitt, Sarah Essex, Jane Greenaway, Debra Padgett, Olive Graham, Garren Scott, Edward Barton, Emma Swindells, Brendan Payne, Jennifer Collins, Yvst Taha, Gary Eltringham                                                                                                                                                                                                                                                                                                                                |
| EPI_ISL_650223                 | Northumbria University / South Tees Hospitals NHS Foundation Trust / North Tees and Hartlepool NHS Foundation Trust / Newcastle Hospitals NHS Foundation Trust                                  | COVID-19 Genomics UK (COG-UK) Consortium | Ban Temperton, Aaron Jeffries, Michelle Michelsen, Joama Warwick-Dugdale, Audrey Febos, Robyn Manley, Stephen Mitchell, Jane Masoli                                                                                                                                                                                                                                                                                                                                                                                                                                                                                                                                                   |
| EPI_ISL_650225                 | University of Exeter                                                                                                                                                                            | COVID-19 Genomics UK (COG-UK) Consortium | Institute of Microbiology, University of Birmingham, Claire McMurray, Joanne Stockton, Samuel Nicholas, Radoslaw Poplawski, Will Rowe, Josh Quick, Nicholas Loman, University of Birmingham Testing Laboratory, Celina M Whalley, Andrew Bosworth, Charlotte Poxon, Kasun Wangasooriya, Oliver Pickles, Mike Kidd, Alex Richter, Andrew D Beggs PHE Heartlands Lab, Husam Osman, Andrew Bosworth, Queen Elizabeth Hospital, Anna Casey                                                                                                                                                                                                                                                |
| EPI_ISL_650234                 | University of Birmingham                                                                                                                                                                        | COVID-19 Genomics UK (COG-UK) Consortium | Institute of Microbiology, University of Birmingham, Claire McMurray, Joanne Stockton, Samuel Nicholas, Radoslaw Poplawski, Will Rowe, Josh Quick, Nicholas Loman, University of Birmingham Testing Laboratory, Celina M Whalley, Andrew Bosworth, Charlotte Poxon, Kasun Wangasooriya, Oliver Pickles, Mike Kidd, Alex Richter, Andrew D Beggs PHE Heartlands Lab, Husam Osman, Andrew Bosworth, Queen Elizabeth Hospital, Anna Casey                                                                                                                                                                                                                                                |
| EPI_ISL_650239                 | Department of Pathology, University of Cambridge                                                                                                                                                | COVID-19 Genomics UK (COG-UK) Consortium | Annus S. Jatun, Yasmin Chaudry, Grant Hall, Iliana Georgiana, Myra Hosmillo, Martin D. Curran, Malte Prickett, Surendra Parmar, Ian Goodfellow                                                                                                                                                                                                                                                                                                                                                                                                                                                                                                                                        |
| EPI_ISL_650242                 | Liverpool Clinical Laboratories                                                                                                                                                                 | COVID-19 Genomics UK (COG-UK) Consortium | Sam Haldeney, Anita Luciad, Steve Paterson, Julian Hiscox, Alistair Darby, M Almsaud, A Alvezalhi, Muhammad Aruwalli, Stuart D Armstrong, Jones Benjamin, Eleanor G Bentley, Anu Chawla, Jordan J Clark, Angela Cowell, Richard Eccles, Isabel Garcia-Dorival, Matthew Gemmill, Alessando Gerada, PFR Gilmore, Richard Gregory, Ximeng Han, Catherine Hartley, Margaret Hughes, Mirren Iurriza-Gomara, James Johnson, L Liu, Jennifer Manson, Charlotte Nelson, Elaine O'Toole, Cassie Olatelu, Rebekah Penrice-Handel, Lucille Ranboux, N P Randle, Trevor Ian Robinson, Parul Sharma, Ghada T Shawli, James P Stewart, Neil Swanston, Ecaterina Varnos, Joanna Wats, Mark Whitehead |
| EPI_ISL_650249                 | Centre for Enzyme Innovation, University of Portsmouth / Translational Research Laboratory, Portsmouth Hospitals NHS Trust                                                                      | COVID-19 Genomics UK (COG-UK) Consortium | Angela Beckvelt, Yarn Bougeois, Garry Scarlett, Sharon Glyshter, Scott Elliot, Kelly Bicknell, Robert Impoy, Alysson Loyd, Sarah Wylie, Ethan Butler, Anoop Chaturhan, Samuel Houson                                                                                                                                                                                                                                                                                                                                                                                                                                                                                                  |
| EPI_ISL_650252                 | University of Birmingham                                                                                                                                                                        | COVID-19 Genomics UK (COG-UK) Consortium | Institute of Microbiology, University of Birmingham, Claire McMurray, Joanne Stockton, Samuel Nicholas, Radoslaw Poplawski, Will Rowe, Josh Quick, Nicholas Loman, University of Birmingham Testing Laboratory, Celina M Whalley, Andrew Bosworth, Charlotte Poxon, Kasun Wangasooriya, Oliver Pickles, Mike Kidd, Alex Richter, Andrew D Beggs PHE Heartlands Lab, Husam Osman, Andrew Bosworth, Queen Elizabeth Hospital, Anna Casey                                                                                                                                                                                                                                                |
| EPI_ISL_650262                 | Department of Pathology, University of Cambridge                                                                                                                                                | COVID-19 Genomics UK (COG-UK) Consortium | Annus S. Jatun, Yasmin Chaudry, Grant Hall, Iliana Georgiana, Myra Hosmillo, Martin D. Curran, Malte Prickett, Surendra Parmar, Ian Goodfellow                                                                                                                                                                                                                                                                                                                                                                                                                                                                                                                                        |
| EPI_ISL_650263                 | Virology Department, Royal Infirmary of Edinburgh, NHS Lothian / School of Biological Sciences, University of Edinburgh / Institute of Genetics and Molecular Medicine, University of Edinburgh | COVID-19 Genomics UK (COG-UK) Consortium | McHugh M, Dewar R, Rooke S, Gallagher M, Balcaza C, O'Toole A, Sche E, Hill V, McCrone JT, Colquhoun R, Yu X, Jackson B, Rambaut A, Williams TC, Templeton K                                                                                                                                                                                                                                                                                                                                                                                                                                                                                                                          |
| EPI_ISL_650265                 | Department of Pathology, University of Cambridge                                                                                                                                                | COVID-19 Genomics UK (COG-UK) Consortium | Annus S. Jatun, Yasmin Chaudry, Grant Hall, Iliana Georgiana, Myra Hosmillo, Martin D. Curran, Malte Prickett, Surendra Parmar, Ian Goodfellow                                                                                                                                                                                                                                                                                                                                                                                                                                                                                                                                        |
| EPI_ISL_650267                 | Virology Department, Royal Infirmary of Edinburgh, NHS Lothian / School of Biological Sciences, University of Edinburgh / Institute of Genetics and Molecular Medicine, University of Edinburgh | COVID-19 Genomics UK (COG-UK) Consortium | McHugh M, Dewar R, Rooke S, Gallagher M, Balcaza C, O'Toole A, Sche E, Hill V, McCrone JT, Colquhoun R, Yu X, Jackson B, Rambaut A, Williams TC, Templeton K                                                                                                                                                                                                                                                                                                                                                                                                                                                                                                                          |
| EPI_ISL_650272                 | Liverpool Clinical Laboratories                                                                                                                                                                 | COVID-19 Genomics UK (COG-UK) Consortium | Sam Haldeney, Anita Luciad, Steve Paterson, Julian Hiscox, Alistair Darby, M Almsaud, A Alvezalhi, Muhammad Aruwalli, Stuart D Armstrong, Jones Benjamin, Eleanor G Bentley, Anu Chawla, Jordan J Clark, Angela Cowell, Richard Eccles, Isabel Garcia-Dorival, Matthew Gemmill, Alessando Gerada, PFR Gilmore, Richard Gregory, Ximeng Han, Catherine Hartley, Margaret Hughes, Mirren Iurriza-Gomara, James Johnson, L Liu, Jennifer Manson, Charlotte Nelson, Elaine O'Toole, Cassie Olatelu, Rebekah Penrice-Handel, Lucille Ranboux, N P Randle, Trevor Ian Robinson, Parul Sharma, Ghada T Shawli, James P Stewart, Neil Swanston, Ecaterina Varnos, Joanna Wats, Mark Whitehead |
| EPI_ISL_650274                 | University of Birmingham                                                                                                                                                                        | COVID-19 Genomics UK (COG-UK) Consortium | Institute of Microbiology, University of Birmingham, Claire McMurray, Joanne Stockton, Samuel Nicholas, Radoslaw Poplawski, Will Rowe, Josh Quick, Nicholas Loman, University of Birmingham Testing Laboratory, Celina M Whalley, Andrew Bosworth, Charlotte Poxon, Kasun Wangasooriya, Oliver Pickles, Mike Kidd, Alex Richter, Andrew D Beggs PHE Heartlands Lab, Husam Osman, Andrew Bosworth, Queen Elizabeth Hospital, Anna Casey                                                                                                                                                                                                                                                |
| EPI_ISL_650275, EPI_ISL_650278 | Liverpool Clinical Laboratories                                                                                                                                                                 | COVID-19 Genomics UK (COG-UK) Consortium | Sam Haldeney, Anita Luciad, Steve Paterson, Julian Hiscox, Alistair Darby, M Almsaud, A Alvezalhi, Muhammad Aruwalli, Stuart D Armstrong, Jones Benjamin, Eleanor G Bentley, Anu Chawla, Jordan J Clark, Angela Cowell, Richard Eccles, Isabel Garcia-Dorival, Matthew Gemmill, Alessando Gerada, PFR Gilmore, Richard Gregory, Ximeng Han, Catherine Hartley, Margaret Hughes, Mirren Iurriza-Gomara, James Johnson, L Liu, Jennifer Manson, Charlotte Nelson, Elaine O'Toole, Cassie Olatelu, Rebekah Penrice-Handel, Lucille Ranboux, N P Randle, Trevor Ian Robinson, Parul Sharma, Ghada T Shawli, James P Stewart, Neil Swanston, Ecaterina Varnos, Joanna Wats, Mark Whitehead |
| EPI_ISL_650282                 | Northumbria University / South Tees Hospitals NHS Foundation Trust / North Tees and Hartlepool NHS Foundation Trust / Newcastle Hospitals NHS Foundation Trust                                  | COVID-19 Genomics UK (COG-UK) Consortium | Darren L Smith, Andrew Nelson, Matthew Bastion, Greg R Young, Joshua Loh, John Allan, Mohammad A Tariq, Giles S Holt, Gary Black, Wen C Yew, Lynn Dover, Paul Baker, Steve Liggitt, Sarah Essex, Jane Greenaway, Debra Padgett, Olive Graham, Garren Scott, Edward Barton, Emma Swindells, Brendan Payne, Jennifer Collins, Yvst Taha, Gary Eltringham                                                                                                                                                                                                                                                                                                                                |
| EPI_ISL_650286                 | Virology Department, Royal Infirmary of Edinburgh, NHS Lothian / School of Biological Sciences, University of Edinburgh / Institute of Genetics and Molecular Medicine, University of Edinburgh | COVID-19 Genomics UK (COG-UK) Consortium | McHugh M, Dewar R, Rooke S, Gallagher M, Balcaza C, O'Toole A, Sche E, Hill V, McCrone JT, Colquhoun R, Yu X, Jackson B, Rambaut A, Williams TC, Templeton K                                                                                                                                                                                                                                                                                                                                                                                                                                                                                                                          |

|                |                                                            |                                          |                                                                                                                                                                                                                                                                                                                                                                                                                                                                                                                                                                                                                                                                                       |
|----------------|------------------------------------------------------------|------------------------------------------|---------------------------------------------------------------------------------------------------------------------------------------------------------------------------------------------------------------------------------------------------------------------------------------------------------------------------------------------------------------------------------------------------------------------------------------------------------------------------------------------------------------------------------------------------------------------------------------------------------------------------------------------------------------------------------------|
| EPI_ISL_650290 | University of Edinburgh<br>Liverpool Clinical Laboratories | COVID-19 Genomics UK (COG-UK) Consortium | Sam Hadenby, Anita Luczad, Steve Paterson, Julian Hiscox, Alistair Darby, M. Almeida, A. Alvezzi, Muhammed Arurwail, Stuart D Armstrong, Jones Benjamin, Eleanor G Bentley, Anu Chawla, Jordan J Clark, Angela Cowell, Richard Eccles, Isabel Garcia-Dorival, Matthew Gemmill, Alessandro Gerada, PFR Gilmore, Richard Gregory, Ximeng Han, Catherine Hartley, Margaret Hughes, Miran Iurriza-Gomara, James Johnson, L. Lu, Jennifer Manson, Charlotte Nelson, Elaine O'Toole, Cassie Olatelu, Rebekah Penrice-Handel, Lucille Rahnow, N. P. Randle, Trevor Ian Robinson, Paul Sharma, Ghada T Shawli, James P Stewart, Neil Swainston, Ecaterina Varnos, Joanna Wats, Mark Whitehead |
| EPI_ISL_650296 | University of Exeter<br>Liverpool Clinical Laboratories    | COVID-19 Genomics UK (COG-UK) Consortium | Ban Temponon Aaron, Jeffries Michelle Michelson, Joanna Warwick-Dugdale, Audrey Fattos, Robyn Manley, Stephen Mitchell, Jana Masoli                                                                                                                                                                                                                                                                                                                                                                                                                                                                                                                                                   |
| EPI_ISL_650299 | Liverpool Clinical Laboratories                            | COVID-19 Genomics UK (COG-UK) Consortium | Sam Hadenby, Anita Luczad, Steve Paterson, Julian Hiscox, Alistair Darby, M. Almeida, A. Alvezzi, Muhammed Arurwail, Stuart D Armstrong, Jones Benjamin, Eleanor G Bentley, Anu Chawla, Jordan J Clark, Angela Cowell, Richard Eccles, Isabel Garcia-Dorival, Matthew Gemmill, Alessandro Gerada, PFR Gilmore, Richard Gregory, Ximeng Han, Catherine Hartley, Margaret Hughes, Miran Iurriza-Gomara, James Johnson, L. Lu, Jennifer Manson, Charlotte Nelson, Elaine O'Toole, Cassie Olatelu, Rebekah Penrice-Handel, Lucille Rahnow, N. P. Randle, Trevor Ian Robinson, Paul Sharma, Ghada T Shawli, James P Stewart, Neil Swainston, Ecaterina Varnos, Joanna Wats, Mark Whitehead |
| EPI_ISL_650302 | University of Exeter                                       | COVID-19 Genomics UK (COG-UK) Consortium | Ban Temponon Aaron, Jeffries Michelle Michelson, Joanna Warwick-Dugdale, Audrey Fattos, Robyn Manley, Stephen Mitchell, Jana Masoli                                                                                                                                                                                                                                                                                                                                                                                                                                                                                                                                                   |
| EPI_ISL_650303 | University of Exeter                                       | COVID-19 Genomics UK (COG-UK) Consortium | Ban Temponon Aaron, Jeffries Michelle Michelson, Joanna Warwick-Dugdale, Audrey Fattos, Robyn Manley, Stephen Mitchell, Jana Masoli                                                                                                                                                                                                                                                                                                                                                                                                                                                                                                                                                   |
| EPI_ISL_650306 | University of Exeter                                       | COVID-19 Genomics UK (COG-UK) Consortium | Ban Temponon Aaron, Jeffries Michelle Michelson, Joanna Warwick-Dugdale, Audrey Fattos, Robyn Manley, Stephen Mitchell, Jana Masoli                                                                                                                                                                                                                                                                                                                                                                                                                                                                                                                                                   |
| EPI_ISL_650307 | University of Exeter                                       | COVID-19 Genomics UK (COG-UK) Consortium | Ban Temponon Aaron, Jeffries Michelle Michelson, Joanna Warwick-Dugdale, Audrey Fattos, Robyn Manley, Stephen Mitchell, Jana Masoli                                                                                                                                                                                                                                                                                                                                                                                                                                                                                                                                                   |
| EPI_ISL_650308 | University of Exeter                                       | COVID-19 Genomics UK (COG-UK) Consortium | Ban Temponon Aaron, Jeffries Michelle Michelson, Joanna Warwick-Dugdale, Audrey Fattos, Robyn Manley, Stephen Mitchell, Jana Masoli                                                                                                                                                                                                                                                                                                                                                                                                                                                                                                                                                   |
| EPI_ISL_650315 | University of Exeter                                       | COVID-19 Genomics UK (COG-UK) Consortium | Ban Temponon Aaron, Jeffries Michelle Michelson, Joanna Warwick-Dugdale, Audrey Fattos, Robyn Manley, Stephen Mitchell, Jana Masoli                                                                                                                                                                                                                                                                                                                                                                                                                                                                                                                                                   |
| EPI_ISL_650319 | University of Exeter                                       | COVID-19 Genomics UK (COG-UK) Consortium | Ban Temponon Aaron, Jeffries Michelle Michelson, Joanna Warwick-Dugdale, Audrey Fattos, Robyn Manley, Stephen Mitchell, Jana Masoli                                                                                                                                                                                                                                                                                                                                                                                                                                                                                                                                                   |
| EPI_ISL_650320 | University of Exeter                                       | COVID-19 Genomics UK (COG-UK) Consortium | Ban Temponon Aaron, Jeffries Michelle Michelson, Joanna Warwick-Dugdale, Audrey Fattos, Robyn Manley, Stephen Mitchell, Jana Masoli                                                                                                                                                                                                                                                                                                                                                                                                                                                                                                                                                   |
| EPI_ISL_650321 | University of Exeter                                       | COVID-19 Genomics UK (COG-UK) Consortium | Ban Temponon Aaron, Jeffries Michelle Michelson, Joanna Warwick-Dugdale, Audrey Fattos, Robyn Manley, Stephen Mitchell, Jana Masoli                                                                                                                                                                                                                                                                                                                                                                                                                                                                                                                                                   |
| EPI_ISL_650322 | University of Exeter                                       | COVID-19 Genomics UK (COG-UK) Consortium | Ban Temponon Aaron, Jeffries Michelle Michelson, Joanna Warwick-Dugdale, Audrey Fattos, Robyn Manley, Stephen Mitchell, Jana Masoli                                                                                                                                                                                                                                                                                                                                                                                                                                                                                                                                                   |
| EPI_ISL_650326 | University of Exeter                                       | COVID-19 Genomics UK (COG-UK) Consortium | Ban Temponon Aaron, Jeffries Michelle Michelson, Joanna Warwick-Dugdale, Audrey Fattos, Robyn Manley, Stephen Mitchell, Jana Masoli                                                                                                                                                                                                                                                                                                                                                                                                                                                                                                                                                   |
| EPI_ISL_650337 | University of Exeter                                       | COVID-19 Genomics UK (COG-UK) Consortium | Ban Temponon Aaron, Jeffries Michelle Michelson, Joanna Warwick-Dugdale, Audrey Fattos, Robyn Manley, Stephen Mitchell, Jana Masoli                                                                                                                                                                                                                                                                                                                                                                                                                                                                                                                                                   |
| EPI_ISL_650338 | University of Exeter                                       | COVID-19 Genomics UK (COG-UK) Consortium | Ban Temponon Aaron, Jeffries Michelle Michelson, Joanna Warwick-Dugdale, Audrey Fattos, Robyn Manley, Stephen Mitchell, Jana Masoli                                                                                                                                                                                                                                                                                                                                                                                                                                                                                                                                                   |
| EPI_ISL_650339 | University of Exeter                                       | COVID-19 Genomics UK (COG-UK) Consortium | Ban Temponon Aaron, Jeffries Michelle Michelson, Joanna Warwick-Dugdale, Audrey Fattos, Robyn Manley, Stephen Mitchell, Jana Masoli                                                                                                                                                                                                                                                                                                                                                                                                                                                                                                                                                   |
| EPI_ISL_650342 | University of Exeter                                       | COVID-19 Genomics UK (COG-UK) Consortium | Ban Temponon Aaron, Jeffries Michelle Michelson, Joanna Warwick-Dugdale, Audrey Fattos, Robyn Manley, Stephen Mitchell, Jana Masoli                                                                                                                                                                                                                                                                                                                                                                                                                                                                                                                                                   |
| EPI_ISL_650345 | University of Exeter                                       | COVID-19 Genomics UK (COG-UK) Consortium | Ban Temponon Aaron, Jeffries Michelle Michelson, Joanna Warwick-Dugdale, Audrey Fattos, Robyn Manley, Stephen Mitchell, Jana Masoli                                                                                                                                                                                                                                                                                                                                                                                                                                                                                                                                                   |
| EPI_ISL_650346 | University of Exeter                                       | COVID-19 Genomics UK (COG-UK) Consortium | Ban Temponon Aaron, Jeffries Michelle Michelson, Joanna Warwick-Dugdale, Audrey Fattos, Robyn Manley, Stephen Mitchell, Jana Masoli                                                                                                                                                                                                                                                                                                                                                                                                                                                                                                                                                   |
| EPI_ISL_650347 | University of Exeter                                       | COVID-19 Genomics UK (COG-UK) Consortium | Ban Temponon Aaron, Jeffries Michelle Michelson, Joanna Warwick-Dugdale, Audrey Fattos, Robyn Manley, Stephen Mitchell, Jana Masoli                                                                                                                                                                                                                                                                                                                                                                                                                                                                                                                                                   |
| EPI_ISL_650349 | University of Exeter                                       | COVID-19 Genomics UK (COG-UK) Consortium | Ban Temponon Aaron, Jeffries Michelle Michelson, Joanna Warwick-Dugdale, Audrey Fattos, Robyn Manley, Stephen Mitchell, Jana Masoli                                                                                                                                                                                                                                                                                                                                                                                                                                                                                                                                                   |
| EPI_ISL_650356 | University of Exeter                                       | COVID-19 Genomics UK (COG-UK) Consortium | Ban Temponon Aaron, Jeffries Michelle Michelson, Joanna Warwick-Dugdale, Audrey Fattos, Robyn Manley, Stephen Mitchell, Jana Masoli                                                                                                                                                                                                                                                                                                                                                                                                                                                                                                                                                   |
| EPI_ISL_650359 | University of Exeter                                       | COVID-19 Genomics UK (COG-UK) Consortium | Ban Temponon Aaron, Jeffries Michelle Michelson, Joanna Warwick-Dugdale, Audrey Fattos, Robyn Manley, Stephen Mitchell, Jana Masoli                                                                                                                                                                                                                                                                                                                                                                                                                                                                                                                                                   |
| EPI_ISL_650360 | University of Exeter                                       | COVID-19 Genomics UK (COG-UK) Consortium | Ban Temponon Aaron, Jeffries Michelle Michelson, Joanna Warwick-Dugdale, Audrey Fattos, Robyn Manley, Stephen Mitchell, Jana Masoli                                                                                                                                                                                                                                                                                                                                                                                                                                                                                                                                                   |
| EPI_ISL_650366 | University of Exeter                                       | COVID-19 Genomics UK (COG-UK) Consortium | Ban Temponon Aaron, Jeffries Michelle Michelson, Joanna Warwick-Dugdale, Audrey Fattos, Robyn Manley, Stephen Mitchell, Jana Masoli                                                                                                                                                                                                                                                                                                                                                                                                                                                                                                                                                   |

|                                                                                |                                                                                                                                                                                                 |                                          |                                                                                                                                                                                                                                                                                                                                                                                                                                                                                                                                                                                                                                                                                     |
|--------------------------------------------------------------------------------|-------------------------------------------------------------------------------------------------------------------------------------------------------------------------------------------------|------------------------------------------|-------------------------------------------------------------------------------------------------------------------------------------------------------------------------------------------------------------------------------------------------------------------------------------------------------------------------------------------------------------------------------------------------------------------------------------------------------------------------------------------------------------------------------------------------------------------------------------------------------------------------------------------------------------------------------------|
| EPI_ISL_650398, EPI_ISL_650399, EPI_ISL_650370, EPI_ISL_650372, EPI_ISL_650374 | Virology Department, Sheffield Teaching Hospitals NHS Foundation Trust/Department of Infection, Immunity and Cardiovascular Disease, The Medical School, University of Sheffield                | COVID-19 Genomics UK (COG-UK) Consortium | Charlote Nelson, Elaine O'Toole, Cassie Olateju, Rebekeh Penrice-Handl , Lucille Rahnbow, N P Randle, Trevor Ian Robinson, Paul Sharma, Ghada T Shawil, James P Stewart, Neil Swainston, Ecaterina Vamos, Joanna Wats, Mark Whitehead                                                                                                                                                                                                                                                                                                                                                                                                                                               |
| EPI_ISL_650376                                                                 | Department of Pathology, University of Cambridge                                                                                                                                                | COVID-19 Genomics UK (COG-UK) Consortium | Aminu S. Jahun, Yasmin Chaudhry, Grant Hall, Iliana Georgana, Myra Hosmillo, Martin D. Curran, Maite Prineker, Surendra Parmar, Ian Goodfellow                                                                                                                                                                                                                                                                                                                                                                                                                                                                                                                                      |
| EPI_ISL_650377                                                                 | University of Exeter                                                                                                                                                                            | COVID-19 Genomics UK (COG-UK) Consortium | Ben Temperon, Aaron Jettles, Michelle Michelsen, Joanna Warwick-Dugdale, Audrey Fardos Robyn Manley, Stephen Mitchell, Jean Mascoli                                                                                                                                                                                                                                                                                                                                                                                                                                                                                                                                                 |
| EPI_ISL_650380                                                                 | University of Birmingham                                                                                                                                                                        | COVID-19 Genomics UK (COG-UK) Consortium | Institute of Microbiology, University of Birmingham, Claire McMurray, Joanne Stockton, Samuel Nicholas, Radoslaw Poplowski, Will Rowe, Josh Quick, Nicholas Loman, University of Birmingham Testing Laboratory, Celina M Whalley, Andrew Bosworth, Charlotte Poxon, Kasun Wangasacorya, Oliver Pickles, Mike Kidd, Alex Richter, Andrew D Beggis PHE Heartlands Lab, Hussam Osman, Andrew Bosworth, Queen Elizabeth Hospital, Anna Casey                                                                                                                                                                                                                                            |
| EPI_ISL_650382                                                                 | Liverpool Clinical Laboratories                                                                                                                                                                 | COVID-19 Genomics UK (COG-UK) Consortium | Sam Haldeney, Anita Lucaci, Steve Paterson, Julian Hiscox, Alistair Darby, M Almsaud, A Alrezkhi, Muhammad Aruwail, Stuart D Armstrong, Jones Benjamin, Eleanor G Bentley, Anu Chawla, Jordan J Clark, Angela Cowell, Richard Eccles, Isabel Garcia-Dorival, Matthew Gemmill, Alessandro Gerada, PFR Gilmore, Richard Gregory, Ximeng Han, Catherine Hartley, Margaret Hughes, Mirren Iurizza-Gomara, James Johnson, L Liu, Jennifer Manson, Charlotte Nelson, Elaine O'Toole, Cassie Olateju, Rebekeh Penrice-Handl , Lucille Rahnbow, N P Randle, Trevor Ian Robinson, Paul Sharma, Ghada T Shawil, James P Stewart, Neil Swainston, Ecaterina Vamos, Joanna Wats, Mark Whitehead |
| EPI_ISL_650389                                                                 | Centre for Enzyme Innovation, University of Portsmouth / Translational Research Laboratory, Portsmouth Hospitals NHS Trust                                                                      | COVID-19 Genomics UK (COG-UK) Consortium | Angela Beckert, Yarn Bougadis, Gary Scarlett, Sharon Glynshter, Scott Elliot, Kelly Beckrell, Robert Impey, Alyson Lloyd, Sarah Wylie, Ethan Butcher, Anoop Chaudhan, Samuel Hooson                                                                                                                                                                                                                                                                                                                                                                                                                                                                                                 |
| EPI_ISL_650392                                                                 | Department of Pathology, University of Cambridge                                                                                                                                                | COVID-19 Genomics UK (COG-UK) Consortium | Aminu S. Jahun, Yasmin Chaudhry, Grant Hall, Iliana Georgana, Myra Hosmillo, Martin D. Curran, Maite Prineker, Surendra Parmar, Ian Goodfellow                                                                                                                                                                                                                                                                                                                                                                                                                                                                                                                                      |
| EPI_ISL_650395                                                                 | Virology Department, Sheffield Teaching Hospitals NHS Foundation Trust/Department of Infection, Immunity and Cardiovascular Disease, The Medical School, University of Sheffield                | COVID-19 Genomics UK (COG-UK) Consortium | Thushan de Silva, Matthew Parker, Nikki Smith, Adri Argvall, Rebecca Brown, Luke Green, Rachel Tucker, Paul Parsons, Danielle Groves, Katie Johnson, Laura Carrilero, Alex Keesley, Dave Partridge, Matthew Wyles, Benjamin Lindsey, Mehmet Yavuz, Mohammad Raza, Cahad Evans                                                                                                                                                                                                                                                                                                                                                                                                       |
| EPI_ISL_650403                                                                 | Northumbria University / South Tees Hospitals NHS Foundation Trust / North Cumbria Integrated Care NHS Foundation Trust / Newcastle Hospitals NHS Foundation Trust                              | COVID-19 Genomics UK (COG-UK) Consortium | Darren L Smith, Andrew Nelson, Matthew Easton, Greg R Young, Joshua Loh, John Allan, Mohammad A Tariq, Giles S Holt, Gary Black, Wen C Yew, Lynn Dover, Paul Baker, Steve Liggitt, Sarah Essex, Jane Greenaway, Debra Padgett, Clive Graham, Garren Scott, Edward Barton, Emma Swindells, Brendan Payne, Jennifer Collins, Yusuf Taha, Gary Ellingham                                                                                                                                                                                                                                                                                                                               |
| EPI_ISL_650405                                                                 | University of Birmingham                                                                                                                                                                        | COVID-19 Genomics UK (COG-UK) Consortium | Institute of Microbiology, University of Birmingham, Claire McMurray, Joanne Stockton, Samuel Nicholas, Radoslaw Poplowski, Will Rowe, Josh Quick, Nicholas Loman, University of Birmingham Testing Laboratory, Celina M Whalley, Andrew Bosworth, Charlotte Poxon, Kasun Wangasacorya, Oliver Pickles, Mike Kidd, Alex Richter, Andrew D Beggis PHE Heartlands Lab, Hussam Osman, Andrew Bosworth, Queen Elizabeth Hospital, Anna Casey                                                                                                                                                                                                                                            |
| EPI_ISL_650412                                                                 | West of Scotland Specialist Virology Centre, NHSGGC / MRC-University of Glasgow Centre for Virus Research                                                                                       | COVID-19 Genomics UK (COG-UK) Consortium | Ara de Silva, Filipe, Natasha Johnson, Kathy Snodden, Daniela Mayr, Stephen Carmichael, Alice Boos, Lily Tong, Janna Nichols, Kratik Nhomku, Sarah McDonnald, Richard Oron, Joseph Hughes, Steven V. Athipalli, David L Robinson, Alexander Maclean, Roy Gordon, Sharif Shaaban, Matthew Holden, Rachel Biscox, Guy Mollard, Kathy L, James Shepherd, Antonia Ho, Emma Thomson                                                                                                                                                                                                                                                                                                      |
| EPI_ISL_650413                                                                 | Quadram Institute Bioscience                                                                                                                                                                    | COVID-19 Genomics UK (COG-UK) Consortium | Dave J Baker, Gemma L Kay, Alp Aydin, Thanh Le-Viet, Steven Rudder, Ara P. Tedim, Anastasiia Kolyva, Maria Diaz, Leonardo de Oliveira Martins, Nabli-Fareed Alkhan, Lizzi Meadows, Rachael Stanley, Nguzi Elnurog, Muhammed Yasar, Nicholas M. Thomson, Alexander J Totter, Rachel Gilroy, Samuel Bloomfield, Claire Stuart, Andrew Bell, Reenesh Prakash, Sami Dervisevic, Alison E. Mather, John Wain, Mark Webber, Andrew J Page, Justin O'Grady                                                                                                                                                                                                                                 |
| EPI_ISL_650416, EPI_ISL_650418                                                 | University of Birmingham                                                                                                                                                                        | COVID-19 Genomics UK (COG-UK) Consortium | Institute of Microbiology, University of Birmingham, Claire McMurray, Joanne Stockton, Samuel Nicholas, Radoslaw Poplowski, Will Rowe, Josh Quick, Nicholas Loman, University of Birmingham Testing Laboratory, Celina M Whalley, Andrew Bosworth, Charlotte Poxon, Kasun Wangasacorya, Oliver Pickles, Mike Kidd, Alex Richter, Andrew D Beggis PHE Heartlands Lab, Hussam Osman, Andrew Bosworth, Queen Elizabeth Hospital, Anna Casey                                                                                                                                                                                                                                            |
| EPI_ISL_650420                                                                 | Liverpool Clinical Laboratories                                                                                                                                                                 | COVID-19 Genomics UK (COG-UK) Consortium | Sam Haldeney, Anita Lucaci, Steve Paterson, Julian Hiscox, Alistair Darby, M Almsaud, A Alrezkhi, Muhammad Aruwail, Stuart D Armstrong, Jones Benjamin, Eleanor G Bentley, Anu Chawla, Jordan J Clark, Angela Cowell, Richard Eccles, Isabel Garcia-Dorival, Matthew Gemmill, Alessandro Gerada, PFR Gilmore, Richard Gregory, Ximeng Han, Catherine Hartley, Margaret Hughes, Mirren Iurizza-Gomara, James Johnson, L Liu, Jennifer Manson, Charlotte Nelson, Elaine O'Toole, Cassie Olateju, Rebekeh Penrice-Handl , Lucille Rahnbow, N P Randle, Trevor Ian Robinson, Paul Sharma, Ghada T Shawil, James P Stewart, Neil Swainston, Ecaterina Vamos, Joanna Wats, Mark Whitehead |
| EPI_ISL_650426, EPI_ISL_650427                                                 | Virology Department, Royal Infirmary of Edinburgh, NHS Lothian / School of Biological Sciences, University of Edinburgh / Institute of Genetics and Molecular Medicine, University of Edinburgh | COVID-19 Genomics UK (COG-UK) Consortium | McHugh M, Dewar R, Rooke S, Gallagher M, Balceza C, O'Toole A, Scher E, Hill V, McCreone JT, Colquhoun R, Yu X, Jackson B, Rambaout A, Williams TC, Templeton K                                                                                                                                                                                                                                                                                                                                                                                                                                                                                                                     |
| EPI_ISL_650428                                                                 | Northumbria University / South Tees Hospitals NHS Foundation Trust / North Cumbria Integrated Care NHS Foundation Trust / Newcastle Hospitals NHS Foundation Trust                              | COVID-19 Genomics UK (COG-UK) Consortium | Darren L Smith, Andrew Nelson, Matthew Easton, Greg R Young, Joshua Loh, John Allan, Mohammad A Tariq, Giles S Holt, Gary Black, Wen C Yew, Lynn Dover, Paul Baker, Steve Liggitt, Sarah Essex, Jane Greenaway, Debra Padgett, Clive Graham, Garren Scott, Edward Barton, Emma Swindells, Brendan Payne, Jennifer Collins, Yusuf Taha, Gary Ellingham                                                                                                                                                                                                                                                                                                                               |
| EPI_ISL_650432                                                                 | University of Birmingham                                                                                                                                                                        | COVID-19 Genomics UK (COG-UK) Consortium | Institute of Microbiology, University of Birmingham, Claire McMurray, Joanne Stockton, Samuel Nicholas, Radoslaw Poplowski, Will Rowe, Josh Quick, Nicholas Loman, University of Birmingham Testing Laboratory, Celina M Whalley, Andrew Bosworth, Charlotte Poxon, Kasun Wangasacorya, Oliver Pickles, Mike Kidd, Alex Richter, Andrew D Beggis PHE Heartlands Lab, Hussam Osman, Andrew Bosworth, Queen Elizabeth Hospital, Anna Casey                                                                                                                                                                                                                                            |
| EPI_ISL_650433                                                                 | Virology Department, Royal Infirmary of Edinburgh, NHS Lothian / School of Biological Sciences, University of Edinburgh / Institute of Genetics and Molecular Medicine, University of Edinburgh | COVID-19 Genomics UK (COG-UK) Consortium | McHugh M, Dewar R, Rooke S, Gallagher M, Balceza C, O'Toole A, Scher E, Hill V, McCreone JT, Colquhoun R, Yu X, Jackson B, Rambaout A, Williams TC, Templeton K                                                                                                                                                                                                                                                                                                                                                                                                                                                                                                                     |
| EPI_ISL_650434, EPI_ISL_650441, EPI_ISL_650442                                 | Liverpool Clinical Laboratories                                                                                                                                                                 | COVID-19 Genomics UK (COG-UK) Consortium | Sam Haldeney, Anita Lucaci, Steve Paterson, Julian Hiscox, Alistair Darby, M Almsaud, A Alrezkhi, Muhammad Aruwail, Stuart D Armstrong, Jones Benjamin, Eleanor G Bentley, Anu Chawla, Jordan J Clark, Angela Cowell, Richard Eccles, Isabel Garcia-Dorival, Matthew Gemmill, Alessandro Gerada, PFR Gilmore, Richard Gregory, Ximeng Han, Catherine Hartley, Margaret Hughes, Mirren Iurizza-Gomara, James Johnson, L Liu, Jennifer Manson, Charlotte Nelson, Elaine O'Toole, Cassie Olateju, Rebekeh Penrice-Handl , Lucille Rahnbow, N P Randle, Trevor Ian Robinson, Paul Sharma, Ghada T Shawil, James P Stewart, Neil Swainston, Ecaterina Vamos, Joanna Wats, Mark Whitehead |
| EPI_ISL_650443                                                                 | Queens Medical Centre, Clinical Microbiology Department / DeepSeq Nottingham                                                                                                                    | COVID-19 Genomics UK (COG-UK) Consortium | Gemma Clark, Wendy Smith, Manjinder Khatk, Vikki M Fleming, Michelle M Lister, Hannah Howson-Wells, Jonathan Bal, Patrick McCuire, Joseph Chappell, Theochanis Tsolodris, Nadine Holmes, Matthew Carlisle, Christopher Moore, Fai Sang, Johnny Debebe, Victoria Wright, Matthew Loose                                                                                                                                                                                                                                                                                                                                                                                               |
| EPI_ISL_650448                                                                 | Liverpool Clinical Laboratories                                                                                                                                                                 | COVID-19 Genomics UK (COG-UK) Consortium | Sam Haldeney, Anita Lucaci, Steve Paterson, Julian Hiscox, Alistair Darby, M Almsaud, A Alrezkhi, Muhammad Aruwail, Stuart D Armstrong, Jones Benjamin, Eleanor G Bentley, Anu Chawla, Jordan J Clark, Angela Cowell, Richard Eccles, Isabel Garcia-Dorival, Matthew Gemmill, Alessandro Gerada, PFR Gilmore, Richard Gregory, Ximeng Han, Catherine Hartley, Margaret Hughes, Mirren Iurizza-Gomara, James Johnson, L Liu, Jennifer Manson, Charlotte Nelson, Elaine O'Toole, Cassie Olateju, Rebekeh Penrice-Handl , Lucille Rahnbow, N P Randle, Trevor Ian Robinson, Paul Sharma, Ghada T Shawil, James P Stewart, Neil Swainston, Ecaterina Vamos, Joanna Wats, Mark Whitehead |
| EPI_ISL_650449                                                                 | Queens Medical Centre, Clinical Microbiology Department / DeepSeq Nottingham                                                                                                                    | COVID-19 Genomics UK (COG-UK) Consortium | Gemma Clark, Wendy Smith, Manjinder Khatk, Vikki M Fleming, Michelle M Lister, Hannah Howson-Wells, Jonathan Bal, Patrick McCuire, Joseph Chappell, Theochanis Tsolodris, Nadine Holmes, Matthew Carlisle, Christopher Moore, Fai Sang, Johnny Debebe, Victoria Wright, Matthew Loose                                                                                                                                                                                                                                                                                                                                                                                               |
| EPI_ISL_650454                                                                 | Quadram Institute Bioscience                                                                                                                                                                    | COVID-19 Genomics UK (COG-UK) Consortium | Dave J Baker, Gemma L Kay, Alp Aydin, Thanh Le-Viet, Steven Rudder, Ara P. Tedim, Anastasiia Kolyva, Maria Diaz, Leonardo de Oliveira Martins,                                                                                                                                                                                                                                                                                                                                                                                                                                                                                                                                      |

|                                                |                                                                                                                                                                                                 |                                          |                                                                                                                                                                                                                                                                                                                                                                                                                                                                                                                                                                                                                                                                                     |
|------------------------------------------------|-------------------------------------------------------------------------------------------------------------------------------------------------------------------------------------------------|------------------------------------------|-------------------------------------------------------------------------------------------------------------------------------------------------------------------------------------------------------------------------------------------------------------------------------------------------------------------------------------------------------------------------------------------------------------------------------------------------------------------------------------------------------------------------------------------------------------------------------------------------------------------------------------------------------------------------------------|
| EPI_ISL_650456                                 | Virology Department, Royal Infirmary of Edinburgh, NHS Lothian / School of Biological Sciences, University of Edinburgh / Institute of Genetics and Molecular Medicine, University of Edinburgh | COVID-19 Genomics UK (COG-UK) Consortium | Nabil-Fareed Alkhran, Lizzie Meadows, Rachael Stanley, Ngozi Elnurogo, Muhammad Yasir, Nicholas M. Thomson, Alexander J Trotter, Rachel Gilroy, Samuel Bloomfield, Claire Stuart, Andrew Bell, Reemesh Prakash, Sami Dervisevic, Alison E. Malher, John Wain, Mark Webber, Andrew J Page, Justin O'Grady                                                                                                                                                                                                                                                                                                                                                                            |
| EPI_ISL_650457, EPI_ISL_650459                 | Quadrant Institute Bioscience                                                                                                                                                                   | COVID-19 Genomics UK (COG-UK) Consortium | McHugh M, Dewar R, Rooke S, Gallagher M, Balcaza C, O'Toole A, Scher E, Hill V, McCrone JT, Colquhoun R, Yu X, Jackson B, Rambaur A, Williams TC, Timpelton K                                                                                                                                                                                                                                                                                                                                                                                                                                                                                                                       |
| EPI_ISL_650463                                 | University of Birmingham                                                                                                                                                                        | COVID-19 Genomics UK (COG-UK) Consortium | Dave J, Baker, Gemma L, Kay, Alp Aydin, Thanh Le-Viet, Steven Rudder, Ana P, Tedin, Anastasia Kolyva, Maria Diaz, Leonardo de Oliveira Martins, Nabil-Fareed Alkhran, Lizzie Meadows, Rachael Stanley, Ngozi Elnurogo, Muhammad Yasir, Nicholas M. Thomson, Alexander J Trotter, Rachel Gilroy, Samuel Bloomfield, Claire Stuart, Andrew Bell, Reemesh Prakash, Sami Dervisevic, Alison E. Malher, John Wain, Mark Webber, Andrew J Page, Justin O'Grady                                                                                                                                                                                                                            |
| EPI_ISL_650468                                 | Quadrant Institute Bioscience                                                                                                                                                                   | COVID-19 Genomics UK (COG-UK) Consortium | Dave J, Baker, Gemma L, Kay, Alp Aydin, Thanh Le-Viet, Steven Rudder, Ana P, Tedin, Anastasia Kolyva, Maria Diaz, Leonardo de Oliveira Martins, Nabil-Fareed Alkhran, Lizzie Meadows, Rachael Stanley, Ngozi Elnurogo, Muhammad Yasir, Nicholas M. Thomson, Alexander J Trotter, Rachel Gilroy, Samuel Bloomfield, Claire Stuart, Andrew Bell, Reemesh Prakash, Sami Dervisevic, Alison E. Malher, John Wain, Mark Webber, Andrew J Page, Justin O'Grady                                                                                                                                                                                                                            |
| EPI_ISL_650473                                 | Liverpool Clinical Laboratories                                                                                                                                                                 | COVID-19 Genomics UK (COG-UK) Consortium | Sam Haldenry, Anita Lucad, Steve Paterson, Julian Hiscox, Alistair Darty, M Almsaud, A Alvezahi, Muhammad Aruwaili, Stuart D Armstrong, Jones Benjamin, Eleanor G Bentley, Anu Chawla, Jordan J Clark, Angela Cowell, Richard Eccles, Isabel Garcia-Dorival, Matthew Gemmill, Alessando Gerada, PKF Gilmore, Richard Gregory, Ximeng Han, Catherine Hartley, Margaret Hughes, Wilen Iurriza-Gomara, James Johnson, L Luu, Jennifer Manson, Charlotte Neilson, Elaine O'Toole, Cassie Olatelu, Rebekah Penrice-Handel, Lucille Hanbrow, N P Randle, Trevor Ian Robinson, Parul Sharma, Ghada T Shawil, James P Stewart, Neil Swainson, Ecaterina Varnos, Joanna Wats, Mark Whitehead |
| EPI_ISL_650475                                 | Quadrant Institute Bioscience                                                                                                                                                                   | COVID-19 Genomics UK (COG-UK) Consortium | Dave J, Baker, Gemma L, Kay, Alp Aydin, Thanh Le-Viet, Steven Rudder, Ana P, Tedin, Anastasia Kolyva, Maria Diaz, Leonardo de Oliveira Martins, Nabil-Fareed Alkhran, Lizzie Meadows, Rachael Stanley, Ngozi Elnurogo, Muhammad Yasir, Nicholas M. Thomson, Alexander J Trotter, Rachel Gilroy, Samuel Bloomfield, Claire Stuart, Andrew Bell, Reemesh Prakash, Sami Dervisevic, Alison E. Malher, John Wain, Mark Webber, Andrew J Page, Justin O'Grady                                                                                                                                                                                                                            |
| EPI_ISL_650477                                 | West of Scotland Specialist Virology Centre, NHSGGC / MRC-University of Glasgow Centre for Virus Research                                                                                       | COVID-19 Genomics UK (COG-UK) Consortium | Ana da Silva Filipe, Natasha Johnson, Kathy Smollett, Daniel Mar, Stephen Carmichael, Alice Broos, Lily Tong, Jenna Nichols, Kyraki Nontikou, Sarah McDonnald, Richard Oron, Joseph Hughes, Sreenu Vattipally, David L Robertson, Alasdair Maclean, Roy Ganson, Sharif Shaaban, Matthew Holden, Rachel Blacow, Guy Mollett, Kathy L, James Shephard, Antonia Ho, Emma Thomson                                                                                                                                                                                                                                                                                                       |
| EPI_ISL_650480                                 | Quadrant Institute Bioscience                                                                                                                                                                   | COVID-19 Genomics UK (COG-UK) Consortium | Dave J, Baker, Gemma L, Kay, Alp Aydin, Thanh Le-Viet, Steven Rudder, Ana P, Tedin, Anastasia Kolyva, Maria Diaz, Leonardo de Oliveira Martins, Nabil-Fareed Alkhran, Lizzie Meadows, Rachael Stanley, Ngozi Elnurogo, Muhammad Yasir, Nicholas M. Thomson, Alexander J Trotter, Rachel Gilroy, Samuel Bloomfield, Claire Stuart, Andrew Bell, Reemesh Prakash, Sami Dervisevic, Alison E. Malher, John Wain, Mark Webber, Andrew J Page, Justin O'Grady                                                                                                                                                                                                                            |
| EPI_ISL_650482, EPI_ISL_650483, EPI_ISL_650484 | West of Scotland Specialist Virology Centre, NHSGGC / MRC-University of Glasgow Centre for Virus Research                                                                                       | COVID-19 Genomics UK (COG-UK) Consortium | Ana da Silva Filipe, Natasha Johnson, Kathy Smollett, Daniel Mar, Stephen Carmichael, Alice Broos, Lily Tong, Jenna Nichols, Kyraki Nontikou, Sarah McDonnald, Richard Oron, Joseph Hughes, Sreenu Vattipally, David L Robertson, Alasdair Maclean, Roy Ganson, Sharif Shaaban, Matthew Holden, Rachel Blacow, Guy Mollett, Kathy L, James Shephard, Antonia Ho, Emma Thomson                                                                                                                                                                                                                                                                                                       |
| EPI_ISL_650485                                 | Quadrant Institute Bioscience                                                                                                                                                                   | COVID-19 Genomics UK (COG-UK) Consortium | Dave J, Baker, Gemma L, Kay, Alp Aydin, Thanh Le-Viet, Steven Rudder, Ana P, Tedin, Anastasia Kolyva, Maria Diaz, Leonardo de Oliveira Martins, Nabil-Fareed Alkhran, Lizzie Meadows, Rachael Stanley, Ngozi Elnurogo, Muhammad Yasir, Nicholas M. Thomson, Alexander J Trotter, Rachel Gilroy, Samuel Bloomfield, Claire Stuart, Andrew Bell, Reemesh Prakash, Sami Dervisevic, Alison E. Malher, John Wain, Mark Webber, Andrew J Page, Justin O'Grady                                                                                                                                                                                                                            |
| EPI_ISL_650486                                 | Liverpool Clinical Laboratories                                                                                                                                                                 | COVID-19 Genomics UK (COG-UK) Consortium | Sam Haldenry, Anita Lucad, Steve Paterson, Julian Hiscox, Alistair Darty, M Almsaud, A Alvezahi, Muhammad Aruwaili, Stuart D Armstrong, Jones Benjamin, Eleanor G Bentley, Anu Chawla, Jordan J Clark, Angela Cowell, Richard Eccles, Isabel Garcia-Dorival, Matthew Gemmill, Alessando Gerada, PKF Gilmore, Richard Gregory, Ximeng Han, Catherine Hartley, Margaret Hughes, Wilen Iurriza-Gomara, James Johnson, L Luu, Jennifer Manson, Charlotte Neilson, Elaine O'Toole, Cassie Olatelu, Rebekah Penrice-Handel, Lucille Hanbrow, N P Randle, Trevor Ian Robinson, Parul Sharma, Ghada T Shawil, James P Stewart, Neil Swainson, Ecaterina Varnos, Joanna Wats, Mark Whitehead |
| EPI_ISL_650487, EPI_ISL_650489                 | Quadrant Institute Bioscience                                                                                                                                                                   | COVID-19 Genomics UK (COG-UK) Consortium | Dave J, Baker, Gemma L, Kay, Alp Aydin, Thanh Le-Viet, Steven Rudder, Ana P, Tedin, Anastasia Kolyva, Maria Diaz, Leonardo de Oliveira Martins, Nabil-Fareed Alkhran, Lizzie Meadows, Rachael Stanley, Ngozi Elnurogo, Muhammad Yasir, Nicholas M. Thomson, Alexander J Trotter, Rachel Gilroy, Samuel Bloomfield, Claire Stuart, Andrew Bell, Reemesh Prakash, Sami Dervisevic, Alison E. Malher, John Wain, Mark Webber, Andrew J Page, Justin O'Grady                                                                                                                                                                                                                            |
| EPI_ISL_650490                                 | West of Scotland Specialist Virology Centre, NHSGGC / MRC-University of Glasgow Centre for Virus Research                                                                                       | COVID-19 Genomics UK (COG-UK) Consortium | Ana da Silva Filipe, Natasha Johnson, Kathy Smollett, Daniel Mar, Stephen Carmichael, Alice Broos, Lily Tong, Jenna Nichols, Kyraki Nontikou, Sarah McDonnald, Richard Oron, Joseph Hughes, Sreenu Vattipally, David L Robertson, Alasdair Maclean, Roy Ganson, Sharif Shaaban, Matthew Holden, Rachel Blacow, Guy Mollett, Kathy L, James Shephard, Antonia Ho, Emma Thomson                                                                                                                                                                                                                                                                                                       |
| EPI_ISL_650495                                 | Virology Department, Royal Infirmary of Edinburgh, NHS Lothian / School of Biological Sciences, University of Edinburgh / Institute of Genetics and Molecular Medicine, University of Edinburgh | COVID-19 Genomics UK (COG-UK) Consortium | McHugh M, Dewar R, Rooke S, Gallagher M, Balcaza C, O'Toole A, Scher E, Hill V, McCrone JT, Colquhoun R, Yu X, Jackson B, Rambaur A, Williams TC, Timpelton K                                                                                                                                                                                                                                                                                                                                                                                                                                                                                                                       |
| EPI_ISL_650496                                 | Liverpool Clinical Laboratories                                                                                                                                                                 | COVID-19 Genomics UK (COG-UK) Consortium | Sam Haldenry, Anita Lucad, Steve Paterson, Julian Hiscox, Alistair Darty, M Almsaud, A Alvezahi, Muhammad Aruwaili, Stuart D Armstrong, Jones Benjamin, Eleanor G Bentley, Anu Chawla, Jordan J Clark, Angela Cowell, Richard Eccles, Isabel Garcia-Dorival, Matthew Gemmill, Alessando Gerada, PKF Gilmore, Richard Gregory, Ximeng Han, Catherine Hartley, Margaret Hughes, Wilen Iurriza-Gomara, James Johnson, L Luu, Jennifer Manson, Charlotte Neilson, Elaine O'Toole, Cassie Olatelu, Rebekah Penrice-Handel, Lucille Hanbrow, N P Randle, Trevor Ian Robinson, Parul Sharma, Ghada T Shawil, James P Stewart, Neil Swainson, Ecaterina Varnos, Joanna Wats, Mark Whitehead |
| EPI_ISL_650509                                 | West of Scotland Specialist Virology Centre, NHSGGC / MRC-University of Glasgow Centre for Virus Research                                                                                       | COVID-19 Genomics UK (COG-UK) Consortium | Ana da Silva Filipe, Natasha Johnson, Kathy Smollett, Daniel Mar, Stephen Carmichael, Alice Broos, Lily Tong, Jenna Nichols, Kyraki Nontikou, Sarah McDonnald, Richard Oron, Joseph Hughes, Sreenu Vattipally, David L Robertson, Alasdair Maclean, Roy Ganson, Sharif Shaaban, Matthew Holden, Rachel Blacow, Guy Mollett, Kathy L, James Shephard, Antonia Ho, Emma Thomson                                                                                                                                                                                                                                                                                                       |
| EPI_ISL_650516                                 | Quadrant Institute Bioscience                                                                                                                                                                   | COVID-19 Genomics UK (COG-UK) Consortium | Dave J, Baker, Gemma L, Kay, Alp Aydin, Thanh Le-Viet, Steven Rudder, Ana P, Tedin, Anastasia Kolyva, Maria Diaz, Leonardo de Oliveira Martins, Nabil-Fareed Alkhran, Lizzie Meadows, Rachael Stanley, Ngozi Elnurogo, Muhammad Yasir, Nicholas M. Thomson, Alexander J Trotter, Rachel Gilroy, Samuel Bloomfield, Claire Stuart, Andrew Bell, Reemesh Prakash, Sami Dervisevic, Alison E. Malher, John Wain, Mark Webber, Andrew J Page, Justin O'Grady                                                                                                                                                                                                                            |
| EPI_ISL_650525, EPI_ISL_650526                 | West of Scotland Specialist Virology Centre, NHSGGC / MRC-University of Glasgow Centre for Virus Research                                                                                       | COVID-19 Genomics UK (COG-UK) Consortium | Ana da Silva Filipe, Natasha Johnson, Kathy Smollett, Daniel Mar, Stephen Carmichael, Alice Broos, Lily Tong, Jenna Nichols, Kyraki Nontikou, Sarah McDonnald, Richard Oron, Joseph Hughes, Sreenu Vattipally, David L Robertson, Alasdair Maclean, Roy Ganson, Sharif Shaaban, Matthew Holden, Rachel Blacow, Guy Mollett, Kathy L, James Shephard, Antonia Ho, Emma Thomson                                                                                                                                                                                                                                                                                                       |
| EPI_ISL_650527, EPI_ISL_650532                 | Liverpool Clinical Laboratories                                                                                                                                                                 | COVID-19 Genomics UK (COG-UK) Consortium | Sam Haldenry, Anita Lucad, Steve Paterson, Julian Hiscox, Alistair Darty, M Almsaud, A Alvezahi, Muhammad Aruwaili, Stuart D Armstrong, Jones                                                                                                                                                                                                                                                                                                                                                                                                                                                                                                                                       |



|                                                                |                                                                                                                                                                                                 |                                          |  |  |                                                                                                                                                                                                                                                                                                                                                                                                                                                                                                                                                                                                                                                                                      |
|----------------------------------------------------------------|-------------------------------------------------------------------------------------------------------------------------------------------------------------------------------------------------|------------------------------------------|--|--|--------------------------------------------------------------------------------------------------------------------------------------------------------------------------------------------------------------------------------------------------------------------------------------------------------------------------------------------------------------------------------------------------------------------------------------------------------------------------------------------------------------------------------------------------------------------------------------------------------------------------------------------------------------------------------------|
| EPI_ISL_650533                                                 |                                                                                                                                                                                                 |                                          |  |  |                                                                                                                                                                                                                                                                                                                                                                                                                                                                                                                                                                                                                                                                                      |
| EPI_ISL_650538                                                 | West of Scotland Specialist Virology Centre, NHS/GGIC / MRG-University of Glasgow Centre for Virus Research                                                                                     | COVID-19 Genomics UK (COG-UK) Consortium |  |  | Benjamin, Eleanor G Bentley, Anu Chawla, Jordan J Clark, Angela Cowell, Richard Eccles, Isabel Garcia-Dorival, Matthew Gemmill, Alessandro Gerada, PKF Gilmore, Richard Gregory, Ximeng Han, Catherine Hartley, Margaret Hughes, Miran Iurriza-Gomara, James Johnson, L Luu, Jennifer Manson, Charlotte Neilson, Elaine O'Toole, Cassie Olatelu, Rebekah Penrice-Handel, Lucile Rambow, N P Randle, Trevor Ian Robinson, Paul Sharma, Ghada T Shawil, James P Stewart, Neil Swainston, Ecaterina Vamos, Joanna Watts, Mark Whithread                                                                                                                                                 |
| EPI_ISL_650546, EPI_ISL_650552, EPI_ISL_650555, EPI_ISL_650557 | Quadram Institute Bioscience                                                                                                                                                                    | COVID-19 Genomics UK (COG-UK) Consortium |  |  | Ana da Silva Filipe, Natascha Johnson, Kathy Shonlett, Daniel Mair, Stephen Carmichael, Alice Brooks, Lily Tong, Jenna Nichols, Kyriaki Nomiakou, Sarah McDonald, Richard Orron, Joseph Hughes, Steenu Vaidikaly, David L Robinson, Alasdair Maclean, Rory Gurnson, Shari Shaaban, Matthew Holden, Rachel Blacow, Guy Mollett, Kathy L, James Shepherd, Antonia Ho, Emma Thomson                                                                                                                                                                                                                                                                                                     |
| EPI_ISL_650560                                                 | Liverpool Clinical Laboratories                                                                                                                                                                 | COVID-19 Genomics UK (COG-UK) Consortium |  |  | Sam Haldenby, Anita Lucaci, Steve Paterson, Julian Hiscox, Alistair Darby, M Aimsaud, A Altezahli, Muhammad Arzuwail, Stuart D Armstrong, Jones Benjamin, Eleanor G Bentley, Anu Chawla, Jordan J Clark, Angela Cowell, Richard Eccles, Isabel Garcia-Dorival, Matthew Gemmill, Alessandro Gerada, PKF Gilmore, Richard Gregory, Ximeng Han, Catherine Hartley, Margaret Hughes, Miran Iurriza-Gomara, James Johnson, L Luu, Jennifer Manson, Charlotte Neilson, Elaine O'Toole, Cassie Olatelu, Rebekah Penrice-Handel, Lucile Rambow, N P Randle, Trevor Ian Robinson, Paul Sharma, Ghada T Shawil, James P Stewart, Neil Swainston, Ecaterina Vamos, Joanna Watts, Mark Whithread |
| EPI_ISL_650582                                                 | University of Birmingham                                                                                                                                                                        | COVID-19 Genomics UK (COG-UK) Consortium |  |  | Institute of Microbiology, University of Birmingham, Claire McMurray, Joanne Stockton, Samuel Nichols, Radoslaw Poplawski, Will Rowe, Josh Quick, Nicholas Loman, University of Birmingham Testing Laboratory, Ceilina M Whalley, Andrew Bosworth, Charlotte Poxon, Kasun Wangasagorya, Oliver Pickles, Mike Kidd, Alex Richter, Andrew D Beggs PHE Heartlands Lab, Husam Osman, Andrew Bosworth, Queen Elizabeth Hospital, Anna Casey                                                                                                                                                                                                                                               |
| EPI_ISL_650587                                                 | Northumbria University / South Tees Hospitals NHS Foundation Trust / North Tees and Hartlepool NHS Foundation Trust / Newcastle Hospitals NHS Foundation Trust                                  | COVID-19 Genomics UK (COG-UK) Consortium |  |  | Darren L Smith, Andrew Nelson, Matthew Bastion, Greg R Young, Joshua Loh, John Allan, Mohammad A Tariq, Giles S Holl, Gary Black, Wen C Yew, Lynn Dover, Paul Baker, Steve Liggitt, Sarah Essex, Jane Greenaway, Debra Padgett, Olive Graham, Darren Scott, Edward Barton, Emma Swindells, Brendan Payne, Jennifer Collins, Yvst Taha, Gary Ellingham                                                                                                                                                                                                                                                                                                                                |
| EPI_ISL_650593, EPI_ISL_650594, EPI_ISL_650596                 | Department of Pathology, University of Cambridge                                                                                                                                                | COVID-19 Genomics UK (COG-UK) Consortium |  |  | Aminu S. Jahun, Yasmin Chaudhry, Grant Hall, Iliana Georgiana, Myra Hosniilo, Martin D. Curran, Malte Frickert, Suerendra Pamar, Ian Goodfellow                                                                                                                                                                                                                                                                                                                                                                                                                                                                                                                                      |
| EPI_ISL_650597                                                 | University of Exeter                                                                                                                                                                            | COVID-19 Genomics UK (COG-UK) Consortium |  |  | Ben T tempton, Aaron Jeffries, Michelle Michelsen, Joanna Warwick-Dugdale, Audrey Fatbos, Robyn Manley, Stephen Mitchell, Jana Masoli                                                                                                                                                                                                                                                                                                                                                                                                                                                                                                                                                |
| EPI_ISL_650600, EPI_ISL_650603                                 | Centre for Enzyme Innovation, University of Portsmouth / Translational Research Laboratory, Portsmouth Hospitals NHS Trust                                                                      | COVID-19 Genomics UK (COG-UK) Consortium |  |  | Angela Backett, Yann Bourgeois, Garry Scarlett, Sharon Glaysher, Scott Elliot, Kelly Rickhail, Robert Impey, Alyson Lloyd, Sean Wylie, Ehan Butcher, Anoop Chauhan, Samuel Rossion                                                                                                                                                                                                                                                                                                                                                                                                                                                                                                   |
| EPI_ISL_650613                                                 | University of Birmingham                                                                                                                                                                        | COVID-19 Genomics UK (COG-UK) Consortium |  |  | Institute of Microbiology, University of Birmingham, Claire McMurray, Joanne Stockton, Samuel Nichols, Radoslaw Poplawski, Will Rowe, Josh Quick, Nicholas Loman, University of Birmingham Testing Laboratory, Ceilina M Whalley, Andrew Bosworth, Charlotte Poxon, Kasun Wangasagorya, Oliver Pickles, Mike Kidd, Alex Richter, Andrew D Beggs PHE Heartlands Lab, Husam Osman, Andrew Bosworth, Queen Elizabeth Hospital, Anna Casey                                                                                                                                                                                                                                               |
| EPI_ISL_650617                                                 | Department of Pathology, University of Cambridge                                                                                                                                                | COVID-19 Genomics UK (COG-UK) Consortium |  |  | Aminu S. Jahun, Yasmin Chaudhry, Grant Hall, Iliana Georgiana, Myra Hosniilo, Martin D. Curran, Malte Frickert, Suerendra Pamar, Ian Goodfellow                                                                                                                                                                                                                                                                                                                                                                                                                                                                                                                                      |
| EPI_ISL_650618                                                 | Virology Department, Royal Infirmary of Edinburgh, NHS Lothian / School of Biological Sciences, University of Edinburgh / Institute of Genetics and Molecular Medicine, University of Edinburgh | COVID-19 Genomics UK (COG-UK) Consortium |  |  | McHugh N, Dewar R, Rooke S, Gallagher M, Balazca C, O'Toole A, Sehe E, Hill V, Mccorne JT, Colquhoun R, Yu X, Jackson B, Rambaut A, Williams TC, Templeton K                                                                                                                                                                                                                                                                                                                                                                                                                                                                                                                         |
| EPI_ISL_650620, EPI_ISL_650621, EPI_ISL_650622, EPI_ISL_650623 | Liverpool Clinical Laboratories                                                                                                                                                                 | COVID-19 Genomics UK (COG-UK) Consortium |  |  | Sam Haldenby, Anita Lucaci, Steve Paterson, Julian Hiscox, Alistair Darby, M Aimsaud, A Altezahli, Muhammad Arzuwail, Stuart D Armstrong, Jones Benjamin, Eleanor G Bentley, Anu Chawla, Jordan J Clark, Angela Cowell, Richard Eccles, Isabel Garcia-Dorival, Matthew Gemmill, Alessandro Gerada, PKF Gilmore, Richard Gregory, Ximeng Han, Catherine Hartley, Margaret Hughes, Miran Iurriza-Gomara, James Johnson, L Luu, Jennifer Manson, Charlotte Neilson, Elaine O'Toole, Cassie Olatelu, Rebekah Penrice-Handel, Lucile Rambow, N P Randle, Trevor Ian Robinson, Paul Sharma, Ghada T Shawil, James P Stewart, Neil Swainston, Ecaterina Vamos, Joanna Watts, Mark Whithread |
| EPI_ISL_650629, EPI_ISL_650631, EPI_ISL_650632, EPI_ISL_650633 | Department of Pathology, University of Cambridge                                                                                                                                                | COVID-19 Genomics UK (COG-UK) Consortium |  |  | Aminu S. Jahun, Yasmin Chaudhry, Grant Hall, Iliana Georgiana, Myra Hosniilo, Martin D. Curran, Malte Frickert, Suerendra Pamar, Ian Goodfellow                                                                                                                                                                                                                                                                                                                                                                                                                                                                                                                                      |
| EPI_ISL_650634, EPI_ISL_650636, EPI_ISL_650639                 | University of Exeter                                                                                                                                                                            | COVID-19 Genomics UK (COG-UK) Consortium |  |  | Ben T tempton, Aaron Jeffries, Michelle Michelsen, Joanna Warwick-Dugdale, Audrey Fatbos, Robyn Manley, Stephen Mitchell, Jana Masoli                                                                                                                                                                                                                                                                                                                                                                                                                                                                                                                                                |
| EPI_ISL_650641                                                 | Queens Medical Centre, Clinical Microbiology Department / Deepseq Nottingham                                                                                                                    | COVID-19 Genomics UK (COG-UK) Consortium |  |  | Gemma Clark, Wendy Smith, Manjinder Khatn, Vicki M Fleming, Michéle M.Lister, Hannah Howson-Wells, Jonathan Ball, Patrick McClure, Joseph Chappell, Theodoranis Tsakalidis, Nadine Holmes, Matthew Carlisle, Christopher Moore, Fai Sang, Johnny Debebe, Victoria Wright, Matthew Loose                                                                                                                                                                                                                                                                                                                                                                                              |
| EPI_ISL_650643, EPI_ISL_650644, EPI_ISL_650645                 | University of Exeter                                                                                                                                                                            | COVID-19 Genomics UK (COG-UK) Consortium |  |  | Ben T tempton, Aaron Jeffries, Michelle Michelsen, Joanna Warwick-Dugdale, Audrey Fatbos, Robyn Manley, Stephen Mitchell, Jana Masoli                                                                                                                                                                                                                                                                                                                                                                                                                                                                                                                                                |
| EPI_ISL_650646                                                 | Virology Department, Sheffield Teaching Hospitals NHS Foundation Trust / Department of Infection, Immunity and Cardiovascular Disease, The Medical School, University of Sheffield              | COVID-19 Genomics UK (COG-UK) Consortium |  |  | Thushan de Silva, Matthew Parker, Nikki Smith, Adri Argyal, Rebecca Brown, Luke Green, Rachel Tucker, Paul Parsons, Danielle Groves, Katie Johnson, Laura Carriero, Alex Keeley, Dave Partridge, Matthew Wyles, Benjamin Lindsey, Mehmet Yavuz, Mohammed Raza, Canal Evans                                                                                                                                                                                                                                                                                                                                                                                                           |
| EPI_ISL_650647                                                 | University of Birmingham                                                                                                                                                                        | COVID-19 Genomics UK (COG-UK) Consortium |  |  | Institute of Microbiology, University of Birmingham, Claire McMurray, Joanne Stockton, Samuel Nichols, Radoslaw Poplawski, Will Rowe, Josh Quick, Nicholas Loman, University of Birmingham Testing Laboratory, Ceilina M Whalley, Andrew Bosworth, Charlotte Poxon, Kasun Wangasagorya, Oliver Pickles, Mike Kidd, Alex Richter, Andrew D Beggs PHE Heartlands Lab, Husam Osman, Andrew Bosworth, Queen Elizabeth Hospital, Anna Casey                                                                                                                                                                                                                                               |
| EPI_ISL_650652, EPI_ISL_650653                                 | Virology Department, Sheffield Teaching Hospitals NHS Foundation Trust / Department of Infection, Immunity and Cardiovascular Disease, The Medical School, University of Sheffield              | COVID-19 Genomics UK (COG-UK) Consortium |  |  | Thushan de Silva, Matthew Parker, Nikki Smith, Adri Argyal, Rebecca Brown, Luke Green, Rachel Tucker, Paul Parsons, Danielle Groves, Katie Johnson, Laura Carriero, Alex Keeley, Dave Partridge, Matthew Wyles, Benjamin Lindsey, Mehmet Yavuz, Mohammed Raza, Canal Evans                                                                                                                                                                                                                                                                                                                                                                                                           |
| EPI_ISL_650654, EPI_ISL_650655                                 | Liverpool Clinical Laboratories                                                                                                                                                                 | COVID-19 Genomics UK (COG-UK) Consortium |  |  | Sam Haldenby, Anita Lucaci, Steve Paterson, Julian Hiscox, Alistair Darby, M Aimsaud, A Altezahli, Muhammad Arzuwail, Stuart D Armstrong, Jones Benjamin, Eleanor G Bentley, Anu Chawla, Jordan J Clark, Angela Cowell, Richard Eccles, Isabel Garcia-Dorival, Matthew Gemmill, Alessandro Gerada, PKF Gilmore, Richard Gregory, Ximeng Han, Catherine Hartley, Margaret Hughes, Miran Iurriza-Gomara, James Johnson, L Luu, Jennifer Manson, Charlotte Neilson, Elaine O'Toole, Cassie Olatelu, Rebekah Penrice-Handel, Lucile Rambow, N P Randle, Trevor Ian Robinson, Paul Sharma, Ghada T Shawil, James P Stewart, Neil Swainston, Ecaterina Vamos, Joanna Watts, Mark Whithread |
| EPI_ISL_650665                                                 | University of Birmingham                                                                                                                                                                        | COVID-19 Genomics UK (COG-UK) Consortium |  |  | Institute of Microbiology, University of Birmingham, Claire McMurray, Joanne Stockton, Samuel Nichols, Radoslaw Poplawski, Will Rowe, Josh Quick, Nicholas Loman, University of Birmingham Testing Laboratory, Ceilina M Whalley, Andrew Bosworth, Charlotte Poxon, Kasun Wangasagorya, Oliver Pickles, Mike Kidd, Alex Richter, Andrew D Beggs PHE Heartlands Lab, Husam Osman, Andrew Bosworth, Queen Elizabeth Hospital, Anna Casey                                                                                                                                                                                                                                               |
| EPI_ISL_650667                                                 | University of Exeter                                                                                                                                                                            | COVID-19 Genomics UK (COG-UK) Consortium |  |  | Ben T tempton, Aaron Jeffries, Michelle Michelsen, Joanna Warwick-Dugdale, Audrey Fatbos, Robyn Manley, Stephen Mitchell, Jana Masoli                                                                                                                                                                                                                                                                                                                                                                                                                                                                                                                                                |

|                                                                |                                                                                                                                                                                                 |                                                                                      |                                                                                                                                                                                                                                                                                                                                                                                                                                                                                                                                                                                                                                                                     |
|----------------------------------------------------------------|-------------------------------------------------------------------------------------------------------------------------------------------------------------------------------------------------|--------------------------------------------------------------------------------------|---------------------------------------------------------------------------------------------------------------------------------------------------------------------------------------------------------------------------------------------------------------------------------------------------------------------------------------------------------------------------------------------------------------------------------------------------------------------------------------------------------------------------------------------------------------------------------------------------------------------------------------------------------------------|
| EPL_ISL_650677                                                 | Quadram Institute Bioscience                                                                                                                                                                    | COVID-19 Genomics UK (COG-UK) Consortium                                             | Dave J. Baker, Gemma L Kay, Alp Aydin, Thanh Le-Viet, Steven Rudder, Ana P. Tedim, Anastasia Kolyva, Maria Diaz, Leonardo de Oliveira Martins, Nabih-Fareed Alkhan, Lizzie Meadows, Rachael Stanley, Ngqzi Elmurogo, Muhammad Yasir, Nicholas M. Thomson, Alexander J Trotter, Rachel Gilroy, Samuel Bloomfield, Claire Stuart, Andrew Bell, Reemesh Prakash, Sami Dervisevic, Alison E. Malher, John Vain, Mark Webber, Andrew J Page, Justin O'Grady                                                                                                                                                                                                              |
| EPL_ISL_650684                                                 | Northumbria University / South Tees Hospitals NHS Foundation Trust / North Tees and Hartlepool NHS Foundation Trust / Newcastle Hospitals NHS Foundation Trust                                  | COVID-19 Genomics UK (COG-UK) Consortium                                             | Darren L Smith, Andrew Nelson, Matthew Bastion, Gagg R Young, Joshua Loh, John Allan, Mohammad A Tariq, Giles S Holt, Gary Black, Wen C Yew, Lynn Dover, Paul Baker, Steve Liggitt, Sarah Essex, Jane Greenaway, Debra Padgett, Olive Graham, Garren Scott, Edward Barton, Emma Swindells, Brendan Payne, Jennifer Collins, Yusef Taha, Gary Eltringham                                                                                                                                                                                                                                                                                                             |
| EPL_ISL_650692                                                 | University of Birmingham                                                                                                                                                                        | COVID-19 Genomics UK (COG-UK) Consortium                                             | Institute of Microbiology, University of Birmingham; Claire McMurray, Joanne Stockton, Samuel Nicholas, Redoslav Poplawski, Will Rowe, Josh Quick, Nicholas Loman, University of Birmingham Testing Laboratory, Ceilina M Whalley, Andrew Bosworth, Charlotte Poxon, Kasun Wangasooriya, Oliver Pickles, Mike Kidd, Alex Richter, Andrew D Beggs PHE Heartlands Lab, Husam Osman, Andrew Bosworth, Queen Elizabeth Hospital, Anna Casey                                                                                                                                                                                                                             |
| EPL_ISL_650697, EPL_ISL_650725, EPL_ISL_650701                 | Department of Pathology, University of Cambridge<br>Queens Medical Centre, Clinical Microbiology Department / Deepseq Nottingham                                                                | COVID-19 Genomics UK (COG-UK) Consortium<br>COVID-19 Genomics UK (COG-UK) Consortium | Aminu S. Jaiun, Yasmin Chaudry, Grant Hall, Iliana Georgina, Myra Hosmiel, Martin D. Curran, Maile Prickett, Surendra Parmar, Ian Goodfield, Gemma Clark, Wendy Smith, Manjinder Khatn, Vicki M Fleming, Michelle M. Lister, Hannah Howson-Wells, Jonathan Ball, Patrick McCune, Joseph Chappell, Theodoras Tsalalidis, Nadine Holmes, Matthew Carlisle, Christopher Moore, Fai Sang, Johnny Debebe, Victoria Wright, Matthew Loose                                                                                                                                                                                                                                 |
| EPL_ISL_650704                                                 | Northumbria University / South Tees Hospitals NHS Foundation Trust / North Tees and Hartlepool NHS Foundation Trust / Newcastle Hospitals NHS Foundation Trust                                  | COVID-19 Genomics UK (COG-UK) Consortium                                             | Darren L Smith, Andrew Nelson, Matthew Bastion, Gagg R Young, Joshua Loh, John Allan, Mohammad A Tariq, Giles S Holt, Gary Black, Wen C Yew, Lynn Dover, Paul Baker, Steve Liggitt, Sarah Essex, Jane Greenaway, Debra Padgett, Olive Graham, Garren Scott, Edward Barton, Emma Swindells, Brendan Payne, Jennifer Collins, Yusef Taha, Gary Eltringham                                                                                                                                                                                                                                                                                                             |
| EPL_ISL_650711                                                 | Centre for Enzyme Innovation, University of Portsmouth / Translational Research Laboratory, Portsmouth Hospitals NHS Trust                                                                      | COVID-19 Genomics UK (COG-UK) Consortium                                             | Angela Beckett, Yarn Bougeois, Gary Scarlett, Sharon Gleysher, Scott Elliot, Kelly Bicknell, Robert Impey, Alyson Lloyd, Sarah Wylie, Eithan Butcher, Anoop Chaturhan, Samuel Houson                                                                                                                                                                                                                                                                                                                                                                                                                                                                                |
| EPL_ISL_650722                                                 | Quadram Institute Bioscience                                                                                                                                                                    | COVID-19 Genomics UK (COG-UK) Consortium                                             | Dave J. Baker, Gemma L Kay, Alp Aydin, Thanh Le-Viet, Steven Rudder, Ana P. Tedim, Anastasia Kolyva, Maria Diaz, Leonardo de Oliveira Martins, Nabih-Fareed Alkhan, Lizzie Meadows, Rachael Stanley, Ngqzi Elmurogo, Muhammad Yasir, Nicholas M. Thomson, Alexander J Trotter, Rachel Gilroy, Samuel Bloomfield, Claire Stuart, Andrew Bell, Reemesh Prakash, Sami Dervisevic, Alison E. Malher, John Vain, Mark Webber, Andrew J Page, Justin O'Grady                                                                                                                                                                                                              |
| EPL_ISL_650724                                                 | University of Birmingham                                                                                                                                                                        | COVID-19 Genomics UK (COG-UK) Consortium                                             | Institute of Microbiology, University of Birmingham; Claire McMurray, Joanne Stockton, Samuel Nicholas, Redoslav Poplawski, Will Rowe, Josh Quick, Nicholas Loman, University of Birmingham Testing Laboratory, Ceilina M Whalley, Andrew Bosworth, Charlotte Poxon, Kasun Wangasooriya, Oliver Pickles, Mike Kidd, Alex Richter, Andrew D Beggs PHE Heartlands Lab, Husam Osman, Andrew Bosworth, Queen Elizabeth Hospital, Anna Casey                                                                                                                                                                                                                             |
| EPL_ISL_650725, EPL_ISL_650726, EPL_ISL_650731, EPL_ISL_650733 | West of Scotland Specialist Virology Centre, NHSGGC / MRC-University of Glasgow Centre for Virus Research                                                                                       | COVID-19 Genomics UK (COG-UK) Consortium                                             | Ana de Silva Filipe, Natasha Johnson, Kathy Snodlett, Daniel Mair, Stephen Carmichael, Alice Brooks, Lily Tong, Jemma Nichols, Kyriaki Nomiou, Sarah McDonald, Richard Oron, Joseph Hughes, Steenu Paripally, David L Robertson, Alasdair Maclean, Roy Gunnson, Sharif Shaaban, Matthew Holden, Rachel Blacow, Guy Mollett, Kathy Li, James Shepherd, Antonia Ho, Emma Thomson                                                                                                                                                                                                                                                                                      |
| EPL_ISL_650737                                                 | Quadram Institute Bioscience                                                                                                                                                                    | COVID-19 Genomics UK (COG-UK) Consortium                                             | Dave J. Baker, Gemma L Kay, Alp Aydin, Thanh Le-Viet, Steven Rudder, Ana P. Tedim, Anastasia Kolyva, Maria Diaz, Leonardo de Oliveira Martins, Nabih-Fareed Alkhan, Lizzie Meadows, Rachael Stanley, Ngqzi Elmurogo, Muhammad Yasir, Nicholas M. Thomson, Alexander J Trotter, Rachel Gilroy, Samuel Bloomfield, Claire Stuart, Andrew Bell, Reemesh Prakash, Sami Dervisevic, Alison E. Malher, John Vain, Mark Webber, Andrew J Page, Justin O'Grady                                                                                                                                                                                                              |
| EPL_ISL_650743                                                 | University of Birmingham                                                                                                                                                                        | COVID-19 Genomics UK (COG-UK) Consortium                                             | Institute of Microbiology, University of Birmingham; Claire McMurray, Joanne Stockton, Samuel Nicholas, Redoslav Poplawski, Will Rowe, Josh Quick, Nicholas Loman, University of Birmingham Testing Laboratory, Ceilina M Whalley, Andrew Bosworth, Charlotte Poxon, Kasun Wangasooriya, Oliver Pickles, Mike Kidd, Alex Richter, Andrew D Beggs PHE Heartlands Lab, Husam Osman, Andrew Bosworth, Queen Elizabeth Hospital, Anna Casey                                                                                                                                                                                                                             |
| EPL_ISL_650748, EPL_ISL_650749                                 | West of Scotland Specialist Virology Centre, NHSGGC / MRC-University of Glasgow Centre for Virus Research                                                                                       | COVID-19 Genomics UK (COG-UK) Consortium                                             | Ana de Silva Filipe, Natasha Johnson, Kathy Snodlett, Daniel Mair, Stephen Carmichael, Alice Brooks, Lily Tong, Jemma Nichols, Kyriaki Nomiou, Sarah McDonald, Richard Oron, Joseph Hughes, Steenu Paripally, David L Robertson, Alasdair Maclean, Roy Gunnson, Sharif Shaaban, Matthew Holden, Rachel Blacow, Guy Mollett, Kathy Li, James Shepherd, Antonia Ho, Emma Thomson                                                                                                                                                                                                                                                                                      |
| EPL_ISL_650757                                                 | Virology Department, Royal Infirmary of Edinburgh, NHS Lothian / School of Biological Sciences, University of Edinburgh / Institute of Genetics and Molecular Medicine, University of Edinburgh | COVID-19 Genomics UK (COG-UK) Consortium                                             | McHugh M, Dewar R, Rooke S, Gallagher M, Balceza C, O'Toole A, Sche E, Hill V, McCrone JT, Colquhoun R, Yu X, Jackson B, Rambaut A, Williams TC, Templeton K                                                                                                                                                                                                                                                                                                                                                                                                                                                                                                        |
| EPL_ISL_650766                                                 | Quadram Institute Bioscience                                                                                                                                                                    | COVID-19 Genomics UK (COG-UK) Consortium                                             | Dave J. Baker, Gemma L Kay, Alp Aydin, Thanh Le-Viet, Steven Rudder, Ana P. Tedim, Anastasia Kolyva, Maria Diaz, Leonardo de Oliveira Martins, Nabih-Fareed Alkhan, Lizzie Meadows, Rachael Stanley, Ngqzi Elmurogo, Muhammad Yasir, Nicholas M. Thomson, Alexander J Trotter, Rachel Gilroy, Samuel Bloomfield, Claire Stuart, Andrew Bell, Reemesh Prakash, Sami Dervisevic, Alison E. Malher, John Vain, Mark Webber, Andrew J Page, Justin O'Grady                                                                                                                                                                                                              |
| EPL_ISL_650772                                                 | University of Birmingham                                                                                                                                                                        | COVID-19 Genomics UK (COG-UK) Consortium                                             | Institute of Microbiology, University of Birmingham; Claire McMurray, Joanne Stockton, Samuel Nicholas, Redoslav Poplawski, Will Rowe, Josh Quick, Nicholas Loman, University of Birmingham Testing Laboratory, Ceilina M Whalley, Andrew Bosworth, Charlotte Poxon, Kasun Wangasooriya, Oliver Pickles, Mike Kidd, Alex Richter, Andrew D Beggs PHE Heartlands Lab, Husam Osman, Andrew Bosworth, Queen Elizabeth Hospital, Anna Casey                                                                                                                                                                                                                             |
| EPL_ISL_650777, EPL_ISL_650778, EPL_ISL_650779                 | Virology Department, Royal Infirmary of Edinburgh, NHS Lothian / School of Biological Sciences, University of Edinburgh / Institute of Genetics and Molecular Medicine, University of Edinburgh | COVID-19 Genomics UK (COG-UK) Consortium                                             | McHugh M, Dewar R, Rooke S, Gallagher M, Balceza C, O'Toole A, Sche E, Hill V, McCrone JT, Colquhoun R, Yu X, Jackson B, Rambaut A, Williams TC, Templeton K                                                                                                                                                                                                                                                                                                                                                                                                                                                                                                        |
| EPL_ISL_650783                                                 | University of Exeter                                                                                                                                                                            | COVID-19 Genomics UK (COG-UK) Consortium                                             | Bent Temperton, Aaron Jeffries, Michelle Nielsen, Joanna Warwick-Dugdale, Audrey Fayos, Robyn Manley, Stephen Mitchell, Jana Masoli                                                                                                                                                                                                                                                                                                                                                                                                                                                                                                                                 |
| EPL_ISL_650786                                                 | Queens Medical Centre, Clinical Microbiology Department / Deepseq Nottingham                                                                                                                    | COVID-19 Genomics UK (COG-UK) Consortium                                             | Gemma Clark, Wendy Smith, Manjinder Khatn, Vicki M Fleming, Michelle M Lister, Hannah Howson-Wells, Jonathan Ball, Patrick McCune, Joseph Chappell, Theodoras Tsalalidis, Nadine Holmes, Matthew Carlisle, Christopher Moore, Fai Sang, Johnny Debebe, Victoria Wright, Matthew Loose                                                                                                                                                                                                                                                                                                                                                                               |
| EPL_ISL_650788                                                 | University of Exeter                                                                                                                                                                            | COVID-19 Genomics UK (COG-UK) Consortium                                             | Bent Temperton, Aaron Jeffries, Michelle Nielsen, Joanna Warwick-Dugdale, Audrey Fayos, Robyn Manley, Stephen Mitchell, Jana Masoli                                                                                                                                                                                                                                                                                                                                                                                                                                                                                                                                 |
| EPL_ISL_650789                                                 | West of Scotland Specialist Virology Centre, NHSGGC / MRC-University of Glasgow Centre for Virus Research                                                                                       | COVID-19 Genomics UK (COG-UK) Consortium                                             | Ana de Silva Filipe, Natasha Johnson, Kathy Snodlett, Daniel Mair, Stephen Carmichael, Alice Brooks, Lily Tong, Jemma Nichols, Kyriaki Nomiou, Sarah McDonald, Richard Oron, Joseph Hughes, Steenu Paripally, David L Robertson, Alasdair Maclean, Roy Gunnson, Sharif Shaaban, Matthew Holden, Rachel Blacow, Guy Mollett, Kathy Li, James Shepherd, Antonia Ho, Emma Thomson                                                                                                                                                                                                                                                                                      |
| EPL_ISL_650792                                                 | University of Birmingham                                                                                                                                                                        | COVID-19 Genomics UK (COG-UK) Consortium                                             | Institute of Microbiology, University of Birmingham; Claire McMurray, Joanne Stockton, Samuel Nicholas, Redoslav Poplawski, Will Rowe, Josh Quick, Nicholas Loman, University of Birmingham Testing Laboratory, Ceilina M Whalley, Andrew Bosworth, Charlotte Poxon, Kasun Wangasooriya, Oliver Pickles, Mike Kidd, Alex Richter, Andrew D Beggs PHE Heartlands Lab, Husam Osman, Andrew Bosworth, Queen Elizabeth Hospital, Anna Casey                                                                                                                                                                                                                             |
| EPL_ISL_650795, EPL_ISL_650797, EPL_ISL_650800                 | Virology Department, Royal Infirmary of Edinburgh, NHS Lothian / School of Biological Sciences, University of Edinburgh / Institute of Genetics and Molecular Medicine, University of Edinburgh | COVID-19 Genomics UK (COG-UK) Consortium                                             | McHugh M, Dewar R, Rooke S, Gallagher M, Balceza C, O'Toole A, Sche E, Hill V, McCrone JT, Colquhoun R, Yu X, Jackson B, Rambaut A, Williams TC, Templeton K                                                                                                                                                                                                                                                                                                                                                                                                                                                                                                        |
| EPL_ISL_650801                                                 | Liverpool Clinical Laboratories                                                                                                                                                                 | COVID-19 Genomics UK (COG-UK) Consortium                                             | Sam Haldeney, Anita Luciad, Steve Paterson, Julian Hiscox, Alistair Darty, M Almsaud, A Alrezkai, Muhammad Atiruwali, Stuart D Armstrong, Jones Benjamin, Elean G Bantley, Anu Chanika, Jordan Clark, Angela Conway, Richard Eccles, Isabel Garcia-Dorival, Matthew Gemmill, Alessandro Gerada, PFC Gilmore, Richard Gregory, Xinying Han, Catherine Henry, Margaret Hughes, Mimi Hurler-Gonzalez, James Johnson, L Lu, Nisha Hanson, Charidade Nelson, Elaine O'Loe, Cassia Odebi, Rebekah Penrice-Francis, Luelle Rankin, N.P. Randa, Tevo Ian Robinson, Paul Sharma, Grada Shavil, James F Stewart, Neil Swanson, Ecaterina Varnos, Joanne Waits, Mark Whitehead |

|                                                                                                                                                                                |                                                                                                                                                                                                 |                                          |                                                                                                                                                                                                                                                                                                                                                                                                                                                                                                                                                                                                                                                                                      |
|--------------------------------------------------------------------------------------------------------------------------------------------------------------------------------|-------------------------------------------------------------------------------------------------------------------------------------------------------------------------------------------------|------------------------------------------|--------------------------------------------------------------------------------------------------------------------------------------------------------------------------------------------------------------------------------------------------------------------------------------------------------------------------------------------------------------------------------------------------------------------------------------------------------------------------------------------------------------------------------------------------------------------------------------------------------------------------------------------------------------------------------------|
| EPI_ISL_650904, EPI_ISL_650905, EPI_ISL_650906                                                                                                                                 | West of Scotland Specialist Virology Centre, NHS/GGC / MRC-University of Glasgow Centre for Virus Research                                                                                      | COVID-19 Genomics UK (COG-UK) Consortium | Ana da Silva Filipe, Natasha Johnson, Kathy Snollett, Daniel Mair, Stephen Carmichael, Alice Brooks, Lily Tong, Jenna Nichols, Kyriaki Nontikou, Sarah McDonald, Richard Orton, Joseph Hughes, Steenu Vattipally, David L Robertson, Alasdair Maclean, Rory Gunnson, Sharif Shaaban, Matthew Holden, Rachel Blacow, Guy Mollat, Kathy L, James Shephard, Antonia Ho, Emma Thomson                                                                                                                                                                                                                                                                                                    |
| EPI_ISL_650909                                                                                                                                                                 | Liverpool Clinical Laboratories                                                                                                                                                                 | COVID-19 Genomics UK (COG-UK) Consortium | Sam Haldenby, Anita Luczad, Steve Paterson, Julian Hiscox, Alistair Darby, M Armsaud, A Alvezzali, Muhammad Aruwaili, Stuart D Armstrong, Jones Benjamin, Eleanor G Bentley, Anu Chawla, Jordan J Clark, Angela Cowell, Richard Eccles, Isabel Garcia-Dorival, Matthew Gemmill, Alessando Gerada, PKF Gilmore, Richard Gregory, Ximeng Han, Catherine Hartley, Margaret Hughes, Wilen Iurriza-Gomara, James Johnson, L Liu, Jennifer Manson, Charlotte Nelson, Elaine O'Toole, Cassie Olatelu, Rebekah Penrice-Handal, Lucille Hanbrow, N P Randle, Trevor Ian Robinson, Paul Sharma, Ghada T Shawil, James P Stewart, Neil Swainston, Ecaterina Varnos, Joanna Wats, Mark Whitehead |
| EPI_ISL_650911                                                                                                                                                                 | Queens Medical Centre, Clinical Microbiology Department / Deepsead Northham                                                                                                                     | COVID-19 Genomics UK (COG-UK) Consortium | Gemma Clark, Wendy Smith, Manjinder Khatk, Vikki M Fleming, Michelle M Lister, Hannah Howson-Weils, Jonathan Ball, Patrick McCuire, Joseph Chappell, Theodoras Tsalferidis, Nadine Holmes, Matthew Carlisle, Christopher Moore, Fel Sang, Johnny DeBee, Victoria Wright, Matthew Loose                                                                                                                                                                                                                                                                                                                                                                                               |
| EPI_ISL_650912, EPI_ISL_650914, EPI_ISL_650915                                                                                                                                 | Virology Department, Royal Infirmary of Edinburgh, NHS Lothian / School of Biological Sciences, University of Edinburgh / Institute of Genetics and Molecular Medicine, University of Edinburgh | COVID-19 Genomics UK (COG-UK) Consortium | McHugh M, Dewar R, Rooke S, Gallagher M, Balcewa C, O'Toole A, Scher E, Hill V, McCrone JT, Colquhoun R, Yu X, Jackson B, Rambaut A, Williams TC, Templeton K                                                                                                                                                                                                                                                                                                                                                                                                                                                                                                                        |
| EPI_ISL_650924, EPI_ISL_650927                                                                                                                                                 | University of Birmingham                                                                                                                                                                        | COVID-19 Genomics UK (COG-UK) Consortium | Institute of Microbiology, University of Birmingham, Claire McMurtry, Joanna Stockton, Samuel Nicholas, Radoslaw Poplawski, Will Rowe, Josh Quick, Nicholas Loren, University of Birmingham Learning Laboratory, Cairn M Whalley, Andrew Besworth, Charlotte Porco, Kasin Wangpaoyayra, Oliver Pickles, Mike Kild, Alex Foster, Andrew D Beggis, FHE Headlands Lab, Husain Osman, Andrew Besworth, Maria Elizabeth Hospital, Aina Casey                                                                                                                                                                                                                                              |
| EPI_ISL_650928                                                                                                                                                                 | Quadram Institute Bioscience                                                                                                                                                                    | COVID-19 Genomics UK (COG-UK) Consortium | Dave J Baker, Gemma L Kay, Alp Aydin, Thanh Le-Viet, Steven Rudder, Ana P, Tedim, Anastasia Kolyva, Maria Diaz, Leonardo de Oliveira Martins, Nabil-Fareed Alkhtan, Lizzie Meadows, Rachael Stanley, Ngzot Elnurgo, Muhammad Yasir, Nicholas M, Thomson, Alexander J Trotter, Rachel Gilroy, Samuel Bloomfield, Claire Stuart, Andrew Bell, Reenesh Prakash, Sami Dervisevic, Alison E, Malher, John Wain, Mark Webber, Andrew J Page, Justin O'Grady                                                                                                                                                                                                                                |
| EPI_ISL_650931                                                                                                                                                                 | Liverpool Clinical Laboratories                                                                                                                                                                 | COVID-19 Genomics UK (COG-UK) Consortium | Sam Haldenby, Anita Luczad, Steve Paterson, Julian Hiscox, Alistair Darby, M Armsaud, A Alvezzali, Muhammad Aruwaili, Stuart D Armstrong, Jones Benjamin, Eleanor G Bentley, Anu Chawla, Jordan J Clark, Angela Cowell, Richard Eccles, Isabel Garcia-Dorival, Matthew Gemmill, Alessando Gerada, PKF Gilmore, Richard Gregory, Ximeng Han, Catherine Hartley, Margaret Hughes, Wilen Iurriza-Gomara, James Johnson, L Liu, Jennifer Manson, Charlotte Nelson, Elaine O'Toole, Cassie Olatelu, Rebekah Penrice-Handal, Lucille Hanbrow, N P Randle, Trevor Ian Robinson, Paul Sharma, Ghada T Shawil, James P Stewart, Neil Swainston, Ecaterina Varnos, Joanna Wats, Mark Whitehead |
| EPI_ISL_650936                                                                                                                                                                 | Department of Pathology, University of Cambridge                                                                                                                                                | COVID-19 Genomics UK (COG-UK) Consortium | Anita da Silva Filipe, Natasha Johnson, Kathy Snollett, Daniel Mair, Stephen Carmichael, Alice Brooks, Lily Tong, Jenna Nichols, Kyriaki Nontikou, Sarah McDonald, Richard Orton, Joseph Hughes, Steenu Vattipally, David L Robertson, Alasdair Maclean, Rory Gunnson, Sharif Shaaban, Matthew Holden, Rachel Blacow, Guy Mollat, Kathy L, James Shephard, Antonia Ho, Emma Thomson                                                                                                                                                                                                                                                                                                  |
| EPI_ISL_650938, EPI_ISL_650939, EPI_ISL_650940, EPI_ISL_650942, EPI_ISL_650943                                                                                                 | West of Scotland Specialist Virology Centre, NHS/GGC / MRC-University of Glasgow Centre for Virus Research                                                                                      | COVID-19 Genomics UK (COG-UK) Consortium | Ana da Silva Filipe, Natasha Johnson, Kathy Snollett, Daniel Mair, Stephen Carmichael, Alice Brooks, Lily Tong, Jenna Nichols, Kyriaki Nontikou, Sarah McDonald, Richard Orton, Joseph Hughes, Steenu Vattipally, David L Robertson, Alasdair Maclean, Rory Gunnson, Sharif Shaaban, Matthew Holden, Rachel Blacow, Guy Mollat, Kathy L, James Shephard, Antonia Ho, Emma Thomson                                                                                                                                                                                                                                                                                                    |
| EPI_ISL_650944                                                                                                                                                                 | Lighthouse Lab in Glasgow / MRC-University of Glasgow Centre for Virus Research                                                                                                                 | COVID-19 Genomics UK (COG-UK) Consortium | Ana da Silva Filipe, Natasha Johnson, Kathy Snollett, Daniel Mair, Stephen Carmichael, Alice Brooks, Lily Tong, Jenna Nichols, Kyriaki Nontikou, Sarah McDonald, Harper Vanshoenhoude, Yvini Kasal, David Gray, Carol Gunnson, Ana Dominciczer, Alasdair Maclean, Rory Gunnson, Richard Orton, Joseph Hughes, Steenu Vattipally, David L Robertson, Sharif Shaaban, Matthew Holden, Kathy L, James Shephard, Antonia Ho, Emma Thomson                                                                                                                                                                                                                                                |
| EPI_ISL_650945, EPI_ISL_650948, EPI_ISL_650982, EPI_ISL_650984, EPI_ISL_650985, EPI_ISL_650986, EPI_ISL_650987, EPI_ISL_650989, EPI_ISL_650990, EPI_ISL_650991, EPI_ISL_650992 | West of Scotland Specialist Virology Centre, NHS/GGC / MRC-University of Glasgow Centre for Virus Research                                                                                      | COVID-19 Genomics UK (COG-UK) Consortium | EPI_ISL_650981, EPI_ISL_650982, EPI_ISL_650983, EPI_ISL_650984, EPI_ISL_650985, EPI_ISL_650986, EPI_ISL_650987, EPI_ISL_650988, EPI_ISL_650989, EPI_ISL_650990, EPI_ISL_650991, EPI_ISL_650992                                                                                                                                                                                                                                                                                                                                                                                                                                                                                       |
| see above                                                                                                                                                                      | West of Scotland Specialist Virology Centre, NHS/GGC / MRC-University of Glasgow Centre for Virus Research                                                                                      | COVID-19 Genomics UK (COG-UK) Consortium | Ana da Silva Filipe, Natasha Johnson, Kathy Snollett, Daniel Mair, Stephen Carmichael, Alice Brooks, Lily Tong, Jenna Nichols, Kyriaki Nontikou, Sarah McDonald, Richard Orton, Joseph Hughes, Steenu Vattipally, David L Robertson, Alasdair Maclean, Rory Gunnson, Sharif Shaaban, Matthew Holden, Catherine Moore, Johnathan Evans, Laura Gifford, Malorie Parry, Simon Cottrell, Angela Marchbank, Alec Birchley, Alexander Adams, Amy Gaslin, Brege Galica-Wilcox, Jason Coombes, Joel Soutigata, Lauren Gilbert, Lee Graham, Nicole Pasochiani, Sara Kunzrzen-Summerhayes, Sarah Taylor, Sophie Jones, Sara Ray, Matthew Bull, Joanna Watkins, Sally Corden, Tom Connor        |
| EPI_ISL_650989, EPI_ISL_650899, EPI_ISL_650892, EPI_ISL_650897                                                                                                                 | Liverpool Clinical Laboratories                                                                                                                                                                 | COVID-19 Genomics UK (COG-UK) Consortium | Sam Haldenby, Anita Luczad, Steve Paterson, Julian Hiscox, Alistair Darby, M Armsaud, A Alvezzali, Muhammad Aruwaili, Stuart D Armstrong, Jones Benjamin, Eleanor G Bentley, Anu Chawla, Jordan J Clark, Angela Cowell, Richard Eccles, Isabel Garcia-Dorival, Matthew Gemmill, Alessando Gerada, PKF Gilmore, Richard Gregory, Ximeng Han, Catherine Hartley, Margaret Hughes, Wilen Iurriza-Gomara, James Johnson, L Liu, Jennifer Manson, Charlotte Nelson, Elaine O'Toole, Cassie Olatelu, Rebekah Penrice-Handal, Lucille Hanbrow, N P Randle, Trevor Ian Robinson, Paul Sharma, Ghada T Shawil, James P Stewart, Neil Swainston, Ecaterina Varnos, Joanna Wats, Mark Whitehead |
| EPI_ISL_650900                                                                                                                                                                 | Quadram Institute Bioscience                                                                                                                                                                    | COVID-19 Genomics UK (COG-UK) Consortium | Dave J Baker, Gemma L Kay, Alp Aydin, Thanh Le-Viet, Steven Rudder, Ana P, Tedim, Anastasia Kolyva, Maria Diaz, Leonardo de Oliveira Martins, Nabil-Fareed Alkhtan, Lizzie Meadows, Rachael Stanley, Ngzot Elnurgo, Muhammad Yasir, Nicholas M, Thomson, Alexander J Trotter, Rachel Gilroy, Samuel Bloomfield, Claire Stuart, Andrew Bell, Reenesh Prakash, Sami Dervisevic, Alison E, Malher, John Wain, Mark Webber, Andrew J Page, Justin O'Grady                                                                                                                                                                                                                                |
| EPI_ISL_650904                                                                                                                                                                 | Liverpool Clinical Laboratories                                                                                                                                                                 | COVID-19 Genomics UK (COG-UK) Consortium | Sam Haldenby, Anita Luczad, Steve Paterson, Julian Hiscox, Alistair Darby, M Armsaud, A Alvezzali, Muhammad Aruwaili, Stuart D Armstrong, Jones Benjamin, Eleanor G Bentley, Anu Chawla, Jordan J Clark, Angela Cowell, Richard Eccles, Isabel Garcia-Dorival, Matthew Gemmill, Alessando Gerada, PKF Gilmore, Richard Gregory, Ximeng Han, Catherine Hartley, Margaret Hughes, Wilen Iurriza-Gomara, James Johnson, L Liu, Jennifer Manson, Charlotte Nelson, Elaine O'Toole, Cassie Olatelu, Rebekah Penrice-Handal, Lucille Hanbrow, N P Randle, Trevor Ian Robinson, Paul Sharma, Ghada T Shawil, James P Stewart, Neil Swainston, Ecaterina Varnos, Joanna Wats, Mark Whitehead |
| EPI_ISL_650905                                                                                                                                                                 | Wales Specialist Virology Centre Sequencing lab: Pathogen Genomics Unit                                                                                                                         | COVID-19 Genomics UK (COG-UK) Consortium | Catherine Moore, Johnathan Evans, Laura Gifford, Malorie Parry, Simon Cottrell, Angela Marchbank, Alec Birchley, Alexander Adams, Amy Gaslin, Brege Galica-Wilcox, Jason Coombes, Joel Soutigata, Lauren Gilbert, Lee Graham, Nicole Pasochiani, Sara Kunzrzen-Summerhayes, Sarah Taylor, Sophie Jones, Sara Ray, Matthew Bull, Joanna Watkins, Sally Corden, Tom Connor                                                                                                                                                                                                                                                                                                             |
| EPI_ISL_650907, EPI_ISL_650909                                                                                                                                                 | Liverpool Clinical Laboratories                                                                                                                                                                 | COVID-19 Genomics UK (COG-UK) Consortium | Sam Haldenby, Anita Luczad, Steve Paterson, Julian Hiscox, Alistair Darby, M Armsaud, A Alvezzali, Muhammad Aruwaili, Stuart D Armstrong, Jones Benjamin, Eleanor G Bentley, Anu Chawla, Jordan J Clark, Angela Cowell, Richard Eccles, Isabel Garcia-Dorival, Matthew Gemmill, Alessando Gerada, PKF Gilmore, Richard Gregory, Ximeng Han, Catherine Hartley, Margaret Hughes, Wilen Iurriza-Gomara, James Johnson, L Liu, Jennifer Manson, Charlotte Nelson, Elaine O'Toole, Cassie Olatelu, Rebekah Penrice-Handal, Lucille Hanbrow, N P Randle, Trevor Ian Robinson, Paul Sharma, Ghada T Shawil, James P Stewart, Neil Swainston, Ecaterina Varnos, Joanna Wats, Mark Whitehead |
| EPI_ISL_650911, EPI_ISL_650912                                                                                                                                                 | Quadram Institute Bioscience                                                                                                                                                                    | COVID-19 Genomics UK (COG-UK) Consortium | Dave J Baker, Gemma L Kay, Alp Aydin, Thanh Le-Viet, Steven Rudder, Ana P, Tedim, Anastasia Kolyva, Maria Diaz, Leonardo de Oliveira Martins, Nabil-Fareed Alkhtan, Lizzie Meadows, Rachael Stanley, Ngzot Elnurgo, Muhammad Yasir, Nicholas M, Thomson, Alexander J Trotter, Rachel Gilroy, Samuel Bloomfield, Claire Stuart, Andrew Bell, Reenesh Prakash, Sami Dervisevic, Alison E, Malher, John Wain, Mark Webber, Andrew J Page, Justin O'Grady                                                                                                                                                                                                                                |
| EPI_ISL_650914                                                                                                                                                                 | Wales Specialist Virology Centre Sequencing lab: Pathogen Genomics Unit                                                                                                                         | COVID-19 Genomics UK (COG-UK) Consortium | Catherine Moore, Johnathan Evans, Laura Gifford, Malorie Parry, Simon Cottrell, Angela Marchbank, Alec Birchley, Alexander Adams, Amy Gaslin, Brege Galica-Wilcox, Jason Coombes, Joel Soutigata, Lauren Gilbert, Lee Graham, Nicole Pasochiani, Sara Kunzrzen-Summerhayes, Sarah Taylor, Sophie Jones, Sara Ray, Matthew Bull, Joanna Watkins, Sally Corden, Tom Connor                                                                                                                                                                                                                                                                                                             |
| EPI_ISL_650917, EPI_ISL_650918                                                                                                                                                 | Quadram Institute Bioscience                                                                                                                                                                    | COVID-19 Genomics UK (COG-UK) Consortium | Dave J Baker, Gemma L Kay, Alp Aydin, Thanh Le-Viet, Steven Rudder, Ana P, Tedim, Anastasia Kolyva, Maria Diaz, Leonardo de Oliveira Martins, Nabil-Fareed Alkhtan, Lizzie Meadows, Rachael Stanley, Ngzot Elnurgo, Muhammad Yasir, Nicholas M, Thomson, Alexander J Trotter, Rachel Gilroy, Samuel Bloomfield, Claire Stuart, Andrew Bell, Reenesh Prakash, Sami Dervisevic, Alison E, Malher, John Wain, Mark Webber, Andrew J Page, Justin O'Grady                                                                                                                                                                                                                                |
| EPI_ISL_650932, EPI_ISL_650934, EPI_ISL_650935, EPI_ISL_650936                                                                                                                 | Liverpool Clinical Laboratories                                                                                                                                                                 | COVID-19 Genomics UK (COG-UK) Consortium | Sam Haldenby, Anita Luczad, Steve Paterson, Julian Hiscox, Alistair Darby, M Armsaud, A Alvezzali, Muhammad Aruwaili, Stuart D Armstrong, Jones Benjamin, Eleanor G Bentley, Anu Chawla, Jordan J Clark, Angela Cowell, Richard Eccles, Isabel Garcia-Dorival, Matthew Gemmill, Alessando Gerada, PKF Gilmore, Richard Gregory, Ximeng Han, Catherine Hartley, Margaret Hughes, Wilen Iurriza-Gomara, James Johnson, L Liu, Jennifer Manson, Charlotte Nelson, Elaine O'Toole, Cassie Olatelu, Rebekah Penrice-Handal, Lucille Hanbrow, N P Randle, Trevor Ian Robinson, Paul Sharma, Ghada T Shawil, James P Stewart, Neil Swainston, Ecaterina Varnos, Joanna Wats, Mark Whitehead |

|                |                                                                                                                                                                                                 |                                          |                                                                                                                                                                                                                                                                                                                                                                                                                                                                                                                                                                                                                                                                               |
|----------------|-------------------------------------------------------------------------------------------------------------------------------------------------------------------------------------------------|------------------------------------------|-------------------------------------------------------------------------------------------------------------------------------------------------------------------------------------------------------------------------------------------------------------------------------------------------------------------------------------------------------------------------------------------------------------------------------------------------------------------------------------------------------------------------------------------------------------------------------------------------------------------------------------------------------------------------------|
| EPI_ISL_650937 | Queens Medical Centre, Clinical Microbiology Department / DeepSeq Nottingham                                                                                                                    | COVID-19 Genomics UK (COG-UK) Consortium | Charlote Nelson, Elaine O'Toole, Cassie Olatelu, Rebekah Parntice-Handl , Lucile Ranboux, N P Randle, Trevor Ian Robinson, Paul Sharma, Ghada T Shawil, James P Stewart, Neil Swanston, Ecaelma Vamos, Joanna Vats, Mark Whitehead                                                                                                                                                                                                                                                                                                                                                                                                                                            |
| EPI_ISL_650938 | Quadram Institute Bioscience                                                                                                                                                                    | COVID-19 Genomics UK (COG-UK) Consortium | Gemma Clark, Wendy Smith, Manjinder Khatkhat, Vicki M Fleming, Michelle M Lister, Hannah Howson-Wells, Jonathan Ball, Patrick McCuire, Joseph Chappell, Theodoris Tsolmidis, Nadine Holmes, Matthew Carlisle, Christopher Moore, Fai Sang, Jorijn Debebe, Victoria Wright, Matthew Loose                                                                                                                                                                                                                                                                                                                                                                                      |
| EPI_ISL_650939 | Liverpool Clinical Laboratories                                                                                                                                                                 | COVID-19 Genomics UK (COG-UK) Consortium | Dave J Baker, Gemma L Kay, Alb Aydin, Thanh Le-Viet, Steven Rudder, Ana P. Tedim, Anastasia Kolyva, Maria Diaz, Leonardo de Oliveira Martins, Nabil-Fareed Alihan, Lizze Meadows, Rachael Stanley, Nguzi Eunuro, Muhammad Yasir, Nicholas M. Thomson, Alexander J Trotter, Rachel Gilroy, Samuel Bloomfield, Claire Stuart, Andrew Bell, Reenesh Prakash, Sami Dervisevic, Alison E. Malher, John Vain, Mark Webber, Andrew J Page, Justin O'Grady                                                                                                                                                                                                                            |
| EPI_ISL_650941 | Centre for Enzyme Innovation, University of Portsmouth / Translational Research Laboratory, Portsmouth Hospitals NHS Trust                                                                      | COVID-19 Genomics UK (COG-UK) Consortium | Angela Beckett, Yann Bourgeois, Garry Scarlett, Sharon Glaysher, Scott Elliott, Kelly Bicknell, Robert Impey, Alyson Lloyd, Sarah Wylie, Ethan Butcher, Anoop Chauhan, Samuel Robson                                                                                                                                                                                                                                                                                                                                                                                                                                                                                          |
| EPI_ISL_650945 | Liverpool Clinical Laboratories                                                                                                                                                                 | COVID-19 Genomics UK (COG-UK) Consortium | Sam Haldenby, Anita Lucea, Steve Paterson, Julian Hiscox, Alistair Darby, M Aimsaud, A Alvezalhi, Muhammad Aruwalli, Stuart D Armstrong, Jones Benjamin, Eleanor G Bentley, Anu Chawla, Jordan J Clark, Angela Cowell, Richard Eccles, Isabel Garcia-Dornal, Matthew Gemmel, Alessando Gerada, PFR Gilmore, Richard Gregory, Ximeng Han, Catherine Hartley, Margaret Hughes, Miran Iurriza-Gomara, James Johnson, L Luu, Jennifer Manson, Charlotte Nelson, Elaine O'Toole, Cassie Olatelu, Rebekah Parntice-Handl , Lucile Ranboux, N P Randle, Trevor Ian Robinson, Paul Sharma, Ghada T Shawil, James P Stewart, Neil Swanston, Ecaelma Vamos, Joanna Vats, Mark Whitehead |
| EPI_ISL_650948 | University of Birmingham                                                                                                                                                                        | COVID-19 Genomics UK (COG-UK) Consortium | Institute of Microbiology, University of Birmingham, Claire McMurray, Joanna Stockton, Samuel Nicholas, Radostaw Poplawski, Will Rowe, Josh Quirk, Nicholas Loman, University of Birmingham Testing Laboratory, Celina M Whalley, Andrew Bosworth, Charlotte Foxon, Kasun Wangasacornya, Oliver Pickles, Mike Kidd, Alex Fisher, Andrew D Begg, PHE Heathlands Lab, Husam Osman, Andrew Bosworth, Queen Elizabeth Hospital, Anna Casey                                                                                                                                                                                                                                        |
| EPI_ISL_650949 | Centre for Enzyme Innovation, University of Portsmouth / Translational Research Laboratory, Portsmouth Hospitals NHS Trust                                                                      | COVID-19 Genomics UK (COG-UK) Consortium | Angela Beckett, Yann Bourgeois, Garry Scarlett, Sharon Glaysher, Scott Elliott, Kelly Bicknell, Robert Impey, Alyson Lloyd, Sarah Wylie, Ethan Butcher, Anoop Chauhan, Samuel Robson                                                                                                                                                                                                                                                                                                                                                                                                                                                                                          |
| EPI_ISL_650952 | Department of Pathology, University of Cambridge                                                                                                                                                | COVID-19 Genomics UK (COG-UK) Consortium | Aminu S. Jatum, Yasmin Chaudry, Grant Hall, Iliriana Georgiana, Myra Hosnilo, Martin D. Curran, Malte Prickett, Surendra Parmar, Ian Goodfellow                                                                                                                                                                                                                                                                                                                                                                                                                                                                                                                               |
| EPI_ISL_650953 | West of Scotland Specialist Virology Centre, NHSGGC / MHC-University of Glasgow Centre for Virus Research                                                                                       | COVID-19 Genomics UK (COG-UK) Consortium | Dave J Baker, Gemma L Kay, Alb Aydin, Thanh Le-Viet, Steven Rudder, Ana P. Tedim, Anastasia Kolyva, Maria Diaz, Leonardo de Oliveira Martins, Nabil-Fareed Alihan, Lizze Meadows, Rachael Stanley, Nguzi Eunuro, Muhammad Yasir, Nicholas M. Thomson, Alexander J Trotter, Rachel Gilroy, Samuel Bloomfield, Claire Stuart, Andrew Bell, Reenesh Prakash, Sami Dervisevic, Alison E. Malher, John Vain, Mark Webber, Andrew J Page, Justin O'Grady                                                                                                                                                                                                                            |
| EPI_ISL_650966 | Centre for Enzyme Innovation, University of Portsmouth / Translational Research Laboratory, Portsmouth Hospitals NHS Trust                                                                      | COVID-19 Genomics UK (COG-UK) Consortium | Angela Beckett, Yann Bourgeois, Garry Scarlett, Sharon Glaysher, Scott Elliott, Kelly Bicknell, Robert Impey, Alyson Lloyd, Sarah Wylie, Ethan Butcher, Anoop Chauhan, Samuel Robson                                                                                                                                                                                                                                                                                                                                                                                                                                                                                          |
| EPI_ISL_650970 | Department of Pathology, University of Cambridge                                                                                                                                                | COVID-19 Genomics UK (COG-UK) Consortium | Aminu S. Jatum, Yasmin Chaudry, Grant Hall, Iliriana Georgiana, Myra Hosnilo, Martin D. Curran, Malte Prickett, Surendra Parmar, Ian Goodfellow                                                                                                                                                                                                                                                                                                                                                                                                                                                                                                                               |
| EPI_ISL_650975 | Quadram Institute Bioscience                                                                                                                                                                    | COVID-19 Genomics UK (COG-UK) Consortium | Dave J Baker, Gemma L Kay, Alb Aydin, Thanh Le-Viet, Steven Rudder, Ana P. Tedim, Anastasia Kolyva, Maria Diaz, Leonardo de Oliveira Martins, Nabil-Fareed Alihan, Lizze Meadows, Rachael Stanley, Nguzi Eunuro, Muhammad Yasir, Nicholas M. Thomson, Alexander J Trotter, Rachel Gilroy, Samuel Bloomfield, Claire Stuart, Andrew Bell, Reenesh Prakash, Sami Dervisevic, Alison E. Malher, John Vain, Mark Webber, Andrew J Page, Justin O'Grady                                                                                                                                                                                                                            |
| EPI_ISL_650978 | Department of Pathology, University of Cambridge                                                                                                                                                | COVID-19 Genomics UK (COG-UK) Consortium | Aminu S. Jatum, Yasmin Chaudry, Grant Hall, Iliriana Georgiana, Myra Hosnilo, Martin D. Curran, Malte Prickett, Surendra Parmar, Ian Goodfellow                                                                                                                                                                                                                                                                                                                                                                                                                                                                                                                               |
| EPI_ISL_650981 | Centre for Enzyme Innovation, University of Portsmouth / Translational Research Laboratory, Portsmouth Hospitals NHS Trust                                                                      | COVID-19 Genomics UK (COG-UK) Consortium | Angela Beckett, Yann Bourgeois, Garry Scarlett, Sharon Glaysher, Scott Elliott, Kelly Bicknell, Robert Impey, Alyson Lloyd, Sarah Wylie, Ethan Butcher, Anoop Chauhan, Samuel Robson                                                                                                                                                                                                                                                                                                                                                                                                                                                                                          |
| EPI_ISL_650986 | Department of Pathology, University of Cambridge                                                                                                                                                | COVID-19 Genomics UK (COG-UK) Consortium | Aminu S. Jatum, Yasmin Chaudry, Grant Hall, Iliriana Georgiana, Myra Hosnilo, Martin D. Curran, Malte Prickett, Surendra Parmar, Ian Goodfellow                                                                                                                                                                                                                                                                                                                                                                                                                                                                                                                               |
| EPI_ISL_650995 | University of Birmingham                                                                                                                                                                        | COVID-19 Genomics UK (COG-UK) Consortium | Institute of Microbiology, University of Birmingham, Claire McMurray, Joanna Stockton, Samuel Nicholas, Radostaw Poplawski, Will Rowe, Josh Quirk, Nicholas Loman, University of Birmingham Testing Laboratory, Celina M Whalley, Andrew Bosworth, Charlotte Foxon, Kasun Wangasacornya, Oliver Pickles, Mike Kidd, Alex Fisher, Andrew D Begg, PHE Heathlands Lab, Husam Osman, Andrew Bosworth, Queen Elizabeth Hospital, Anna Casey                                                                                                                                                                                                                                        |
| EPI_ISL_651009 | Department of Pathology, University of Cambridge                                                                                                                                                | COVID-19 Genomics UK (COG-UK) Consortium | Aminu S. Jatum, Yasmin Chaudry, Grant Hall, Iliriana Georgiana, Myra Hosnilo, Martin D. Curran, Malte Prickett, Surendra Parmar, Ian Goodfellow                                                                                                                                                                                                                                                                                                                                                                                                                                                                                                                               |
| EPI_ISL_651012 | Virology Department, Royal Infirmary of Edinburgh, NHS Lothian / School of Biological Sciences, University of Edinburgh / Institute of Genetics and Molecular Medicine, University of Edinburgh | COVID-19 Genomics UK (COG-UK) Consortium | McHugh M, Dewar R, Rooke S, Gallagher M, Balceca C, O'Toole A, Sgher E, Hill V, McCorne JT, Colquhoun R, Yu X, Jackson B, Rambaut A, Williams TC, Tampanon K                                                                                                                                                                                                                                                                                                                                                                                                                                                                                                                  |
| EPI_ISL_651020 | Department of Pathology, University of Cambridge                                                                                                                                                | COVID-19 Genomics UK (COG-UK) Consortium | Aminu S. Jatum, Yasmin Chaudry, Grant Hall, Iliriana Georgiana, Myra Hosnilo, Martin D. Curran, Malte Prickett, Surendra Parmar, Ian Goodfellow                                                                                                                                                                                                                                                                                                                                                                                                                                                                                                                               |
| see above      | Department of Pathology, University of Cambridge                                                                                                                                                | COVID-19 Genomics UK (COG-UK) Consortium | Aminu S. Jatum, Yasmin Chaudry, Grant Hall, Iliriana Georgiana, Myra Hosnilo, Martin D. Curran, Malte Prickett, Surendra Parmar, Ian Goodfellow                                                                                                                                                                                                                                                                                                                                                                                                                                                                                                                               |
| EPI_ISL_651048 | Quadram Institute Bioscience                                                                                                                                                                    | COVID-19 Genomics UK (COG-UK) Consortium | Dave J Baker, Gemma L Kay, Alb Aydin, Thanh Le-Viet, Steven Rudder, Ana P. Tedim, Anastasia Kolyva, Maria Diaz, Leonardo de Oliveira Martins, Nabil-Fareed Alihan, Lizze Meadows, Rachael Stanley, Nguzi Eunuro, Muhammad Yasir, Nicholas M. Thomson, Alexander J Trotter, Rachel Gilroy, Samuel Bloomfield, Claire Stuart, Andrew Bell, Reenesh Prakash, Sami Dervisevic, Alison E. Malher, John Vain, Mark Webber, Andrew J Page, Justin O'Grady                                                                                                                                                                                                                            |
| EPI_ISL_651050 | Department of Pathology, University of Cambridge                                                                                                                                                | COVID-19 Genomics UK (COG-UK) Consortium | Aminu S. Jatum, Yasmin Chaudry, Grant Hall, Iliriana Georgiana, Myra Hosnilo, Martin D. Curran, Malte Prickett, Surendra Parmar, Ian Goodfellow                                                                                                                                                                                                                                                                                                                                                                                                                                                                                                                               |
| EPI_ISL_651053 | University of Exeter                                                                                                                                                                            | COVID-19 Genomics UK (COG-UK) Consortium | Ban Thompson, Aaron Jeffries, Michelle Michalson, Joanna Warwick-Dugdale, Audrey Fardos, Robyn Manley, Stephen Mitchell, Jane Masoli                                                                                                                                                                                                                                                                                                                                                                                                                                                                                                                                          |
| EPI_ISL_651056 | University of Exeter                                                                                                                                                                            | COVID-19 Genomics UK (COG-UK) Consortium | Ban Thompson, Aaron Jeffries, Michelle Michalson, Joanna Warwick-Dugdale, Audrey Fardos, Robyn Manley, Stephen Mitchell, Jane Masoli                                                                                                                                                                                                                                                                                                                                                                                                                                                                                                                                          |
| EPI_ISL_651057 | University of Exeter                                                                                                                                                                            | COVID-19 Genomics UK (COG-UK) Consortium | Ban Thompson, Aaron Jeffries, Michelle Michalson, Joanna Warwick-Dugdale, Audrey Fardos, Robyn Manley, Stephen Mitchell, Jane Masoli                                                                                                                                                                                                                                                                                                                                                                                                                                                                                                                                          |
| EPI_ISL_651072 | Queens Medical Centre, Clinical Microbiology Department / DeepSeq Nottingham                                                                                                                    | COVID-19 Genomics UK (COG-UK) Consortium | Gemma Clark, Wendy Smith, Manjinder Khatkhat, Vicki M Fleming, Michelle M Lister, Hannah Howson-Wells, Jonathan Ball, Patrick McCuire, Joseph Chappell, Theodoris Tsolmidis, Nadine Holmes, Matthew Carlisle, Christopher Moore, Fai Sang, Jorijn Debebe, Victoria Wright, Matthew Loose                                                                                                                                                                                                                                                                                                                                                                                      |
| EPI_ISL_651075 | University of Exeter                                                                                                                                                                            | COVID-19 Genomics UK (COG-UK) Consortium | Ban Thompson, Aaron Jeffries, Michelle Michalson, Joanna Warwick-Dugdale, Audrey Fardos, Robyn Manley, Stephen Mitchell, Jane Masoli                                                                                                                                                                                                                                                                                                                                                                                                                                                                                                                                          |
| EPI_ISL_651077 | Virology Department, Sheffield Teaching Hospitals NHS                                                                                                                                           | COVID-19 Genomics UK (COG-UK) Consortium | Thushan de Silva, Matthew Parker, Nikki Smith, Adr Anygal, Rebecca Brown, Luke Green, Rachel Tucker, Paul Parsons, Danielle Groves, Katie Johnson,                                                                                                                                                                                                                                                                                                                                                                                                                                                                                                                            |

EPI\_ISL\_651088 Oxford Virotics, NDM, University of Oxford, Oxford University Hospitals, Basingshoke and North Hampshire Hospital  
Quadrant Institute Bioscience

EPI\_ISL\_651110, EPI\_ISL\_651113, EPI\_ISL\_651119, EPI\_ISL\_651124 West of Scotland Specialist Virology Centre, NHSGGC / MRC-University of Glasgow Centre for Virus Research

Foundation Trust/Department of Infection, Immunity and Cardiovascular Disease, The Medical School, University of Sheffield

COVID-19 Genomics UK (COG-UK) Consortium

COVID-19 Genomics UK (COG-UK) Consortium

Laura Carrierio, Alex Keeley, Dave Partridge, Matthew Wyles, Benjamin Lindsey, Mehmet Yavuz, Mohammad Raza, Catia Evans

Tanya Golubchik, David Bonnell, George MacIntyre, Amy Trebes, Mariateresa de Cassa, Cathrín Moore, Alex Mobbs, Anita Justica, Robert Shaw, Monique Andersson, Timothy Peto, Emma Wise, Nathan Moore, Jessica Lynch, Nick Corres, Malida Wolf, Stephen Kidd, David Buck, John Todd, Christina Fraser

Dave J. Baker, Gemma L. Kay, Alp Aydin, Thanh Le-Viet, Steven Rudder, Ana P. Tedim, Anastasia Kolyva, Maria Diaz, Leonardo de Oliveira Martins, Nabih-Fareed Alkhran, Lizzie Meadows, Rachael Stanley, Nguzi Elnurugo, Muhammad Yasir, Nicholas M. Thomson, Alexander J Trotter, Rachel Gilroy, Samuel Bloomfield, Claire Stuart, Andrew Bell, Reemesh Prakash, Sami Dervisevic, Alison E. Malher, John Vain, Mark Webber, Andrew J. Page, Justin O'Grady

EPI\_ISL\_651125 West of Scotland Specialist Virology Centre, NHSGGC / MRC-University of Glasgow Centre for Virus Research

EPI\_ISL\_651127 University of Birmingham

COVID-19 Genomics UK (COG-UK) Consortium

COVID-19 Genomics UK (COG-UK) Consortium

Ana da Silva Felipe, Nataasha Johnson, Kathy Snollett, Daniel Mair, Stephen Carmichael, Alice Brooks, Lily Tong, Jemma Nichols, Kyraki Nomioku, Sarah McDonald, Richard Oton, Joseph Hughes, Steenu Vaidikpally, David L Robertson, Alasdair Maclean, Rory Gurnston, Sharif Shaaban, Matthew Holden, Rachel Blacow, Guy Mollett, Kathy L. James Shephard, Antonia Ho, Emma Thomson

Institute of Microbiology, University of Birmingham, Claire McMurray, Joanne Stockton, Samuel Nicholas, Radoslaw Poplawski, Will Rowe, Josh Quick, Nicholas Loman, University of Birmingham Testing Laboratory, Ceilina M Whalley, Andrew Bosworth, Charlotte Poxon, Kasun Wangasooriya, Oliver Pickles, Mike Kidd, Alex Richter, Andrew D Beggs PHE Heartlands Lab, Husam Osman, Andrew Bosworth, Queen Elizabeth Hospital, Anna Casey

Sam Haldenry, Anita Luczai, Steve Paterson, Julian Hiscox, Alistair Darby, M Almsaud, A Alvezahi, Muhammad Aruwaili, Stuart D Armstrong, Jones Benjamin, Eleanor G Bentley, Anu Chawla, Jordan J Clark, Angela Cowell, Richard Eccles, Isabel Garcia-Dorival, Matthew Gemmill, Alessando Gerada, PFR Gilmore, Richard Gregory, Ximeng Han, Catherine Hartley, Margaret Hughes, Wilen Turiza-Gomara, James Johnson, L Lu, Jennifer Manson, Charlotte Nelson, Elaine O'Toole, Cassie Olatelu, Rebekah Penrice-Handel, Lucille Hanbow, N. P Randle, Trevor Ian Robinson, Parul Sharma, Ghada T Shawil, James P Stewart, Neil Swainston, Ecaterina Varnos, Joanna Vats, Mark Whitehead

EPI\_ISL\_651129 Liverpool Clinical Laboratories

EPI\_ISL\_651130 University of Exeter

EPI\_ISL\_651132 University College London, Great Ormond Street Hospital for Children NHS Foundation Trust, Imperial College Healthcare NHS Trust

COVID-19 Genomics UK (COG-UK) Consortium

COVID-19 Genomics UK (COG-UK) Consortium

COVID-19 Genomics UK (COG-UK) Consortium

Ben Temperton, Aaron Jeffries, Michelle Michelsen, Joanna Warwick-Dugdale, Audrey Fatos, Robyn Manley, Stephen Mitchell, Jane Masoli Seigi Castellano, Rachel Williams, Mark Kristiansen, Paola Resende Silva, Surando Roy, Tony Broods, Helena Tull, Paola Nola, Patricia Dyal, Charlotte Williams, Leyza Forrest, Yasmin Panchbhaya, Jacqueline Findlay, Samuel Weeks, Julianna Brown, Kathryn Harris, Paul Randell, James Price, Alison Holmes, Judith Breuer

Dave J. Baker, Gemma L. Kay, Alp Aydin, Thanh Le-Viet, Steven Rudder, Ana P. Tedim, Anastasia Kolyva, Maria Diaz, Leonardo de Oliveira Martins, Nabih-Fareed Alkhran, Lizzie Meadows, Rachael Stanley, Nguzi Elnurugo, Muhammad Yasir, Nicholas M. Thomson, Alexander J Trotter, Rachel Gilroy, Samuel Bloomfield, Claire Stuart, Andrew Bell, Reemesh Prakash, Sami Dervisevic, Alison E. Malher, John Vain, Mark Webber, Andrew J. Page, Justin O'Grady

EPI\_ISL\_651133 Quadrant Institute Bioscience

EPI\_ISL\_651140 University of Birmingham

COVID-19 Genomics UK (COG-UK) Consortium

COVID-19 Genomics UK (COG-UK) Consortium

Institute of Microbiology, University of Birmingham, Claire McMurray, Joanne Stockton, Samuel Nicholas, Radoslaw Poplawski, Will Rowe, Josh Quick, Nicholas Loman, University of Birmingham Testing Laboratory, Ceilina M Whalley, Andrew Bosworth, Charlotte Poxon, Kasun Wangasooriya, Oliver Pickles, Mike Kidd, Alex Richter, Andrew D Beggs PHE Heartlands Lab, Husam Osman, Andrew Bosworth, Queen Elizabeth Hospital, Anna Casey

Dave J. Baker, Gemma L. Kay, Alp Aydin, Thanh Le-Viet, Steven Rudder, Ana P. Tedim, Anastasia Kolyva, Maria Diaz, Leonardo de Oliveira Martins, Nabih-Fareed Alkhran, Lizzie Meadows, Rachael Stanley, Nguzi Elnurugo, Muhammad Yasir, Nicholas M. Thomson, Alexander J Trotter, Rachel Gilroy, Samuel Bloomfield, Claire Stuart, Andrew Bell, Reemesh Prakash, Sami Dervisevic, Alison E. Malher, John Vain, Mark Webber, Andrew J. Page, Justin O'Grady

Ben Temperton, Aaron Jeffries, Michelle Michelsen, Joanna Warwick-Dugdale, Audrey Fatos, Robyn Manley, Stephen Mitchell, Jane Masoli Institute of Microbiology, University of Birmingham, Claire McMurray, Joanne Stockton, Samuel Nicholas, Radoslaw Poplawski, Will Rowe, Josh Quick, Nicholas Loman, University of Birmingham Testing Laboratory, Ceilina M Whalley, Andrew Bosworth, Charlotte Poxon, Kasun Wangasooriya, Oliver Pickles, Mike Kidd, Alex Richter, Andrew D Beggs PHE Heartlands Lab, Husam Osman, Andrew Bosworth, Queen Elizabeth Hospital, Anna Casey

EPI\_ISL\_651143 University of Exeter

EPI\_ISL\_651144 University of Birmingham

EPI\_ISL\_651142 Quadrant Institute Bioscience

EPI\_ISL\_651146 Liverpool Clinical Laboratories

COVID-19 Genomics UK (COG-UK) Consortium

Ben Temperton, Aaron Jeffries, Michelle Michelsen, Joanna Warwick-Dugdale, Audrey Fatos, Robyn Manley, Stephen Mitchell, Jane Masoli Institute of Microbiology, University of Birmingham, Claire McMurray, Joanne Stockton, Samuel Nicholas, Radoslaw Poplawski, Will Rowe, Josh Quick, Nicholas Loman, University of Birmingham Testing Laboratory, Ceilina M Whalley, Andrew Bosworth, Charlotte Poxon, Kasun Wangasooriya, Oliver Pickles, Mike Kidd, Alex Richter, Andrew D Beggs PHE Heartlands Lab, Husam Osman, Andrew Bosworth, Queen Elizabeth Hospital, Anna Casey

Sam Haldenry, Anita Luczai, Steve Paterson, Julian Hiscox, Alistair Darby, M Almsaud, A Alvezahi, Muhammad Aruwaili, Stuart D Armstrong, Jones Benjamin, Eleanor G Bentley, Anu Chawla, Jordan J Clark, Angela Cowell, Richard Eccles, Isabel Garcia-Dorival, Matthew Gemmill, Alessando Gerada, PFR Gilmore, Richard Gregory, Ximeng Han, Catherine Hartley, Margaret Hughes, Wilen Turiza-Gomara, James Johnson, L Lu, Jennifer Manson, Charlotte Nelson, Elaine O'Toole, Cassie Olatelu, Rebekah Penrice-Handel, Lucille Hanbow, N. P Randle, Trevor Ian Robinson, Parul Sharma, Ghada T Shawil, James P Stewart, Neil Swainston, Ecaterina Varnos, Joanna Vats, Mark Whitehead

Thushan de Silva, Matthew Parker, Nikki Smith, Aidi Arayal, Rebecca Brown, Luke Green, Rachel Tucker, Paul Parsons, Danielle Groves, Katie Johnson, Laura Carrierio, Alex Keeley, Dave Partridge, Matthew Wyles, Benjamin Lindsey, Mehmet Yavuz, Mohammad Raza, Catia Evans

EPI\_ISL\_651152 Virology Department, Sheffield Teaching Hospitals NHS Foundation Trust, Department of Infection, Immunity and Cardiovascular Disease, The Medical School, University of Sheffield

COVID-19 Genomics UK (COG-UK) Consortium

Dave J. Baker, Gemma L. Kay, Alp Aydin, Thanh Le-Viet, Steven Rudder, Ana P. Tedim, Anastasia Kolyva, Maria Diaz, Leonardo de Oliveira Martins, Nabih-Fareed Alkhran, Lizzie Meadows, Rachael Stanley, Nguzi Elnurugo, Muhammad Yasir, Nicholas M. Thomson, Alexander J Trotter, Rachel Gilroy, Samuel Bloomfield, Claire Stuart, Andrew Bell, Reemesh Prakash, Sami Dervisevic, Alison E. Malher, John Vain, Mark Webber, Andrew J. Page, Justin O'Grady

Mchugh M, Dewar R, Rooke S, Gallagher M, Balceza C, O'Toole A, Schee E, Hill V, McCrone JT, Colquhoun R, Yu X, Jackson B, Rambaut A, Williams TC, Temperton K

EPI\_ISL\_651158 Virology Department, Royal Infirmary of Edinburgh NHS (Lichani) / School of Biological Sciences, University of Edinburgh / Institute of Genetics and Molecular Medicine, University of Edinburgh

EPI\_ISL\_651160 West of Scotland Specialist Virology Centre, NHSGGC / MRC-University of Glasgow Centre for Virus Research

COVID-19 Genomics UK (COG-UK) Consortium

COVID-19 Genomics UK (COG-UK) Consortium

Ana da Silva Felipe, Nataasha Johnson, Kathy Snollett, Daniel Mair, Stephen Carmichael, Alice Brooks, Lily Tong, Jemma Nichols, Kyraki Nomioku, Sarah McDonald, Richard Oton, Joseph Hughes, Steenu Vaidikpally, David L Robertson, Alasdair Maclean, Rory Gurnston, Sharif Shaaban, Matthew Holden, Rachel Blacow, Guy Mollett, Kathy L. James Shephard, Antonia Ho, Emma Thomson

Sam Haldenry, Anita Luczai, Steve Paterson, Julian Hiscox, Alistair Darby, M Almsaud, A Alvezahi, Muhammad Aruwaili, Stuart D Armstrong, Jones Benjamin, Eleanor G Bentley, Anu Chawla, Jordan J Clark, Angela Cowell, Richard Eccles, Isabel Garcia-Dorival, Matthew Gemmill, Alessando Gerada, PFR Gilmore, Richard Gregory, Ximeng Han, Catherine Hartley, Margaret Hughes, Wilen Turiza-Gomara, James Johnson, L Lu, Jennifer Manson, Charlotte Nelson, Elaine O'Toole, Cassie Olatelu, Rebekah Penrice-Handel, Lucille Hanbow, N. P Randle, Trevor Ian Robinson, Parul Sharma, Ghada T Shawil, James P Stewart, Neil Swainston, Ecaterina Varnos, Joanna Vats, Mark Whitehead

Daren L Smith, Andrew Nelson, Matthew Bastion, Greg R Young, Joshua Loh, John Allen, Mohammar A, Tiang Giles S Hoh, Gary Black, Wen C Yew, Lynn Dover, Paul Baker, Steve Iggitt, Sarah Essex, Jane Greenaway, Debra Piddell, Clive Grahnam, Garren Scott, Edward Barton, Emma Swindells, Brendan Payne, Jennifer Collins, Yusuf Taha, Gary Ellringerham

EPI\_ISL\_651163 Liverpool Clinical Laboratories

EPI\_ISL\_651164 Northumbria University / South Tees Hospitals NHS Foundation Trust / North Cumbria Integrated Care NHS Foundation Trust / North Tees and Hartlepool NHS Foundation Trust / Newcastle Hospitals NHS Foundation Trust

COVID-19 Genomics UK (COG-UK) Consortium

COVID-19 Genomics UK (COG-UK) Consortium

Institute of Microbiology, University of Birmingham, Claire McMurray, Joanne Stockton, Samuel Nicholas, Radoslaw Poplawski, Will Rowe, Josh Quick, Nicholas Loman, University of Birmingham Testing Laboratory, Ceilina M Whalley, Andrew Bosworth, Charlotte Poxon, Kasun Wangasooriya, Oliver Pickles, Mike Kidd, Alex Richter, Andrew D Beggs PHE Heartlands Lab, Husam Osman, Andrew Bosworth, Queen Elizabeth Hospital, Anna Casey

Ben Temperton, Aaron Jeffries, Michelle Michelsen, Joanna Warwick-Dugdale, Audrey Fatos, Robyn Manley, Stephen Mitchell, Jane Masoli Sam Haldenry, Anita Luczai, Steve Paterson, Julian Hiscox, Alistair Darby, M Almsaud, A Alvezahi, Muhammad Aruwaili, Stuart D Armstrong, Jones Benjamin, Eleanor G Bentley, Anu Chawla, Jordan J Clark, Angela Cowell, Richard Eccles, Isabel Garcia-Dorival, Matthew Gemmill, Alessando Gerada,

EPI\_ISL\_651177 University of Exeter

EPI\_ISL\_651178 Liverpool Clinical Laboratories

COVID-19 Genomics UK (COG-UK) Consortium

COVID-19 Genomics UK (COG-UK) Consortium

|                                |                                                                                                                                                                                                 |                                          |                                                                                                                                                                                                                                                                                                                                                                                                                                                                                                                                                                                                                                                                                     |
|--------------------------------|-------------------------------------------------------------------------------------------------------------------------------------------------------------------------------------------------|------------------------------------------|-------------------------------------------------------------------------------------------------------------------------------------------------------------------------------------------------------------------------------------------------------------------------------------------------------------------------------------------------------------------------------------------------------------------------------------------------------------------------------------------------------------------------------------------------------------------------------------------------------------------------------------------------------------------------------------|
| EPI_ISL_651183                 | University of Exeter                                                                                                                                                                            | COVID-19 Genomics UK (COG-UK) Consortium | PKF Gilmore, Richard Gregory, Ximeng Han, Catherine Hartley, Margaret Hughes, Wifren Ilturza-Gomara, James Johnson, L Lu, Jennifer Manson, Charlotte Neilson, Elaine O'Toole, Cassie Olatelu, Rebekah Penrice-Handel, Lucille Hanbrow, N P Randle, Trevor Ian Robinson, Paul Sharma, Ghada T Shawli, James P Stewart, Neil Swainson, Ecaterina Varnos, Joanna Wats, Mark Whitehead                                                                                                                                                                                                                                                                                                  |
| EPI_ISL_651187                 | Centre for Enzyme Innovation, University of Portsmouth / Translational Research Laboratory, Portsmouth Hospitals NHS Trust                                                                      | COVID-19 Genomics UK (COG-UK) Consortium | Ben Temperton, Aaron Jeffries, Michelle Nielsen, Joanna Wearwick-Dugdale, Audrey Fardos, Robyn Mantley, Stephen Mitchell, Jana Maszoli, Angela Beckel, Yann Bougarnis, Darryl Scariett, Sharon Glaysher, Scott Elliott, Kelly Rickell, Robert Impey, Alison Lloyd, Sarah Wylie, Ethan Butcher, Anoop Chaulan, Samuel Roobson                                                                                                                                                                                                                                                                                                                                                        |
| EPI_ISL_651188                 | Virology Department, Royal Infirmary of Edinburgh, NHS Lothian / School of Biological Sciences, University of Edinburgh / Institute of Genetics and Molecular Medicine, University of Edinburgh | COVID-19 Genomics UK (COG-UK) Consortium | McHugh M, Dewar R, Rooke S, Gallagher M, Balceaza C, O'Toole A, Scher E, Hill V, McCrone JT, Colquhoun R, Yu X, Jackson B, Rambaut A, Williams TC, Templeton K                                                                                                                                                                                                                                                                                                                                                                                                                                                                                                                      |
| EPI_ISL_651189                 | Queens Medical Centre, Clinical Microbiology Department / Deepseq Northtrigam                                                                                                                   | COVID-19 Genomics UK (COG-UK) Consortium | Gemma Clark, Wendy Smith, Manjinder Khatn, Vicki M Fleming, Michelle M Lister, Hannah Howson-Wells, Jonathan Ball, Patrick McCure, Joseph Chappell, Theodoros Tsaldaris, Nadine Holmes, Matthew Carlisle, Christopher Moore, Fai Sang, Johnny Debebe, Victoria Wright, Matthew Coose                                                                                                                                                                                                                                                                                                                                                                                                |
| EPI_ISL_651192                 | Liverpool Clinical Laboratories                                                                                                                                                                 | COVID-19 Genomics UK (COG-UK) Consortium | Sam Haldenby, Ania Luczai, Steve Paterson, Julian Hiscox, Alistair Darby, M Almsaud, A Altezahli, Muhammad Aruwaili, Stuart D Armstrong, Jones Benjamin, Eleanor G Bentley, Anu Chawla, Jordan J Clark, Angela Cowell, Richard Eccles, Isabel Garcia-Donval, Matthew Gemmill, Alessandro Gerada, PKF Gilmore, Richard Gregory, Ximeng Han, Catherine Hartley, Margaret Hughes, Wifren Ilturza-Gomara, James Johnson, L Lu, Jennifer Manson, Charlotte Neilson, Elaine O'Toole, Cassie Olatelu, Rebekah Penrice-Handel, Lucille Hanbrow, N P Randle, Trevor Ian Robinson, Paul Sharma, Ghada T Shawli, James P Stewart, Neil Swainson, Ecaterina Varnos, Joanna Wats, Mark Whitehead |
| EPI_ISL_651193, EPI_ISL_651195 | University of Birmingham                                                                                                                                                                        | COVID-19 Genomics UK (COG-UK) Consortium | Institute of Microbiology, University of Birmingham; Claire McMurray, Joanne Stockton, Samuel Nicholas, Radostaw Popkewski, Will Rowe, Josh Quick, Nicholas Loman, University of Birmingham Testing Laboratory, Celina M Whalley, Andrew Bosworth, Charlotte Poxon, Kasun Wangasoraya, Oliver Pickles, Mike Kidd, Alex Richter, Andrew D Beggs, PHE Heartlands Lab, Husam Osman, Andrew Bosworth, Queen Elizabeth Hospital, Anna Casey                                                                                                                                                                                                                                              |
| EPI_ISL_651196, EPI_ISL_651197 | Liverpool Clinical Laboratories                                                                                                                                                                 | COVID-19 Genomics UK (COG-UK) Consortium | Sam Haldenby, Ania Luczai, Steve Paterson, Julian Hiscox, Alistair Darby, M Almsaud, A Altezahli, Muhammad Aruwaili, Stuart D Armstrong, Jones Benjamin, Eleanor G Bentley, Anu Chawla, Jordan J Clark, Angela Cowell, Richard Eccles, Isabel Garcia-Donval, Matthew Gemmill, Alessandro Gerada, PKF Gilmore, Richard Gregory, Ximeng Han, Catherine Hartley, Margaret Hughes, Wifren Ilturza-Gomara, James Johnson, L Lu, Jennifer Manson, Charlotte Neilson, Elaine O'Toole, Cassie Olatelu, Rebekah Penrice-Handel, Lucille Hanbrow, N P Randle, Trevor Ian Robinson, Paul Sharma, Ghada T Shawli, James P Stewart, Neil Swainson, Ecaterina Varnos, Joanna Wats, Mark Whitehead |
| EPI_ISL_651200                 | University of Birmingham                                                                                                                                                                        | COVID-19 Genomics UK (COG-UK) Consortium | Institute of Microbiology, University of Birmingham; Claire McMurray, Joanne Stockton, Samuel Nicholas, Radostaw Popkewski, Will Rowe, Josh Quick, Nicholas Loman, University of Birmingham Testing Laboratory, Celina M Whalley, Andrew Bosworth, Charlotte Poxon, Kasun Wangasoraya, Oliver Pickles, Mike Kidd, Alex Richter, Andrew D Beggs, PHE Heartlands Lab, Husam Osman, Andrew Bosworth, Queen Elizabeth Hospital, Anna Casey                                                                                                                                                                                                                                              |
| EPI_ISL_651202                 | Department of Pathology, University of Cambridge                                                                                                                                                | COVID-19 Genomics UK (COG-UK) Consortium | Aminu S, Jahn, Yasmin Chaudhry, Grant Hall, Iliana Georgiana, Myra Hosnilo, Martin D. Curran, Malie Prickelet, Surendra Pamar, Ian Goodfellow                                                                                                                                                                                                                                                                                                                                                                                                                                                                                                                                       |
| EPI_ISL_651204, EPI_ISL_651210 | Quadrant Institute Bioscience                                                                                                                                                                   | COVID-19 Genomics UK (COG-UK) Consortium | Dave J Baker, Gemma L Kay, Alb Aydin, Thanh Le-Viet, Steven Rudder, Ana P. Tedim, Anastasiia Kolyva, Maria Diaz, Leonardo de Oliveira Martins, Nabil-Fareed Alihan, Lizze Meadows, Rachael Stanley, Ngzot Elnurgo, Muhammad Yasir, Nicholas M. Thomson, Alexander J Totter, Rachel Gilroy, Samuel Bloomfield, Claire Stuart, Andrew Bell, Reenesh Prakash, Sami Dervisevic, Alison E. Malher, John Wain, Mark Webber, Andrew J Page, Justin O'Grady                                                                                                                                                                                                                                 |
| EPI_ISL_651213                 | Liverpool Clinical Laboratories                                                                                                                                                                 | COVID-19 Genomics UK (COG-UK) Consortium | Sam Haldenby, Ania Luczai, Steve Paterson, Julian Hiscox, Alistair Darby, M Almsaud, A Altezahli, Muhammad Aruwaili, Stuart D Armstrong, Jones Benjamin, Eleanor G Bentley, Anu Chawla, Jordan J Clark, Angela Cowell, Richard Eccles, Isabel Garcia-Donval, Matthew Gemmill, Alessandro Gerada, PKF Gilmore, Richard Gregory, Ximeng Han, Catherine Hartley, Margaret Hughes, Wifren Ilturza-Gomara, James Johnson, L Lu, Jennifer Manson, Charlotte Neilson, Elaine O'Toole, Cassie Olatelu, Rebekah Penrice-Handel, Lucille Hanbrow, N P Randle, Trevor Ian Robinson, Paul Sharma, Ghada T Shawli, James P Stewart, Neil Swainson, Ecaterina Varnos, Joanna Wats, Mark Whitehead |
| EPI_ISL_651217                 | Quadrant Institute Bioscience                                                                                                                                                                   | COVID-19 Genomics UK (COG-UK) Consortium | Dave J Baker, Gemma L Kay, Alb Aydin, Thanh Le-Viet, Steven Rudder, Ana P. Tedim, Anastasiia Kolyva, Maria Diaz, Leonardo de Oliveira Martins, Nabil-Fareed Alihan, Lizze Meadows, Rachael Stanley, Ngzot Elnurgo, Muhammad Yasir, Nicholas M. Thomson, Alexander J Totter, Rachel Gilroy, Samuel Bloomfield, Claire Stuart, Andrew Bell, Reenesh Prakash, Sami Dervisevic, Alison E. Malher, John Wain, Mark Webber, Andrew J Page, Justin O'Grady                                                                                                                                                                                                                                 |
| EPI_ISL_651219                 | Liverpool Clinical Laboratories                                                                                                                                                                 | COVID-19 Genomics UK (COG-UK) Consortium | Sam Haldenby, Ania Luczai, Steve Paterson, Julian Hiscox, Alistair Darby, M Almsaud, A Altezahli, Muhammad Aruwaili, Stuart D Armstrong, Jones Benjamin, Eleanor G Bentley, Anu Chawla, Jordan J Clark, Angela Cowell, Richard Eccles, Isabel Garcia-Donval, Matthew Gemmill, Alessandro Gerada, PKF Gilmore, Richard Gregory, Ximeng Han, Catherine Hartley, Margaret Hughes, Wifren Ilturza-Gomara, James Johnson, L Lu, Jennifer Manson, Charlotte Neilson, Elaine O'Toole, Cassie Olatelu, Rebekah Penrice-Handel, Lucille Hanbrow, N P Randle, Trevor Ian Robinson, Paul Sharma, Ghada T Shawli, James P Stewart, Neil Swainson, Ecaterina Varnos, Joanna Wats, Mark Whitehead |
| EPI_ISL_651222                 | Northumbria University / South Tees Hospitals NHS Foundation Trust / North Tees and Hartlepool NHS Foundation Trust / Newcastle Hospitals NHS Foundation Trust                                  | COVID-19 Genomics UK (COG-UK) Consortium | Daren L Smith, Andrew Nelson, Matthew Bastion, Greg R Young, Joshua Loh, John Alan Mohammad, A Tariq Jibs, S Hoi, Gary Black, Wen C Yew, Lynn Dover, Paul Baker, Steve Liggett, Sarah Essex, Jane Greenaway, Debra Padgett, Clive Graham, Garren Scott, Edward Barton, Emma Swindells, Brendan Payne, Jennifer Collins, Yusef Taha, Gary Eltringham                                                                                                                                                                                                                                                                                                                                 |
| EPI_ISL_651224                 | Virology Department, Sheffield Teaching Hospitals NHS Foundation Trust/Department of Infection, Immunity and Cardiovascular Disease, The Medical School, University of Sheffield                | COVID-19 Genomics UK (COG-UK) Consortium | Trushian de Silva, Matthew Parker, Nikki Smith, Adri Anygal, Rebecca Brown, Luke Green, Rachel Tucker, Paul Parsons, Danielle Groves, Katie Johnson, Laura Carrilero, Alex Keesley, Dave Partridge, Matthew Wyles, Benjamin Lindsey, Mehner Yavuz, Mohammad Raza, Caitid Evans                                                                                                                                                                                                                                                                                                                                                                                                      |
| EPI_ISL_651225                 | Liverpool Clinical Laboratories                                                                                                                                                                 | COVID-19 Genomics UK (COG-UK) Consortium | Sam Haldenby, Ania Luczai, Steve Paterson, Julian Hiscox, Alistair Darby, M Almsaud, A Altezahli, Muhammad Aruwaili, Stuart D Armstrong, Jones Benjamin, Eleanor G Bentley, Anu Chawla, Jordan J Clark, Angela Cowell, Richard Eccles, Isabel Garcia-Donval, Matthew Gemmill, Alessandro Gerada, PKF Gilmore, Richard Gregory, Ximeng Han, Catherine Hartley, Margaret Hughes, Wifren Ilturza-Gomara, James Johnson, L Lu, Jennifer Manson, Charlotte Neilson, Elaine O'Toole, Cassie Olatelu, Rebekah Penrice-Handel, Lucille Hanbrow, N P Randle, Trevor Ian Robinson, Paul Sharma, Ghada T Shawli, James P Stewart, Neil Swainson, Ecaterina Varnos, Joanna Wats, Mark Whitehead |
| EPI_ISL_651228                 | Quadrant Institute Bioscience                                                                                                                                                                   | COVID-19 Genomics UK (COG-UK) Consortium | Dave J Baker, Gemma L Kay, Alb Aydin, Thanh Le-Viet, Steven Rudder, Ana P. Tedim, Anastasiia Kolyva, Maria Diaz, Leonardo de Oliveira Martins, Nabil-Fareed Alihan, Lizze Meadows, Rachael Stanley, Ngzot Elnurgo, Muhammad Yasir, Nicholas M. Thomson, Alexander J Totter, Rachel Gilroy, Samuel Bloomfield, Claire Stuart, Andrew Bell, Reenesh Prakash, Sami Dervisevic, Alison E. Malher, John Wain, Mark Webber, Andrew J Page, Justin O'Grady                                                                                                                                                                                                                                 |
| EPI_ISL_651228, EPI_ISL_651230 | Virology Department, Royal Infirmary of Edinburgh, NHS Lothian / School of Biological Sciences, University of Edinburgh / Institute of Genetics and Molecular Medicine, University of Edinburgh | COVID-19 Genomics UK (COG-UK) Consortium | McHugh M, Dewar R, Rooke S, Gallagher M, Balceaza C, O'Toole A, Scher E, Hill V, McCrone JT, Colquhoun R, Yu X, Jackson B, Rambaut A, Williams TC, Templeton K                                                                                                                                                                                                                                                                                                                                                                                                                                                                                                                      |
| EPI_ISL_651234, EPI_ISL_651236 | Liverpool Clinical Laboratories                                                                                                                                                                 | COVID-19 Genomics UK (COG-UK) Consortium | Sam Haldenby, Ania Luczai, Steve Paterson, Julian Hiscox, Alistair Darby, M Almsaud, A Altezahli, Muhammad Aruwaili, Stuart D Armstrong, Jones Benjamin, Eleanor G Bentley, Anu Chawla, Jordan J Clark, Angela Cowell, Richard Eccles, Isabel Garcia-Donval, Matthew Gemmill, Alessandro Gerada, PKF Gilmore, Richard Gregory, Ximeng Han, Catherine Hartley, Margaret Hughes, Wifren Ilturza-Gomara, James Johnson, L Lu, Jennifer Manson, Charlotte Neilson, Elaine O'Toole, Cassie Olatelu, Rebekah Penrice-Handel, Lucille Hanbrow, N P Randle, Trevor Ian Robinson, Paul Sharma, Ghada T Shawli, James P Stewart, Neil Swainson, Ecaterina Varnos, Joanna Wats, Mark Whitehead |
| EPI_ISL_651237                 | Quadrant Institute Bioscience                                                                                                                                                                   | COVID-19 Genomics UK (COG-UK) Consortium | Dave J Baker, Gemma L Kay, Alb Aydin, Thanh Le-Viet, Steven Rudder, Ana P. Tedim, Anastasiia Kolyva, Maria Diaz, Leonardo de Oliveira Martins, Nabil-Fareed Alihan, Lizze Meadows, Rachael Stanley, Ngzot Elnurgo, Muhammad Yasir, Nicholas M. Thomson, Alexander J Totter, Rachel Gilroy, Samuel Bloomfield, Claire Stuart, Andrew Bell, Reenesh Prakash, Sami Dervisevic, Alison E. Malher, John Wain, Mark Webber, Andrew J Page, Justin O'Grady                                                                                                                                                                                                                                 |

|                                                                |                                                                                                                                                                                                                     |                                                                                      |                                                                                                                                                                                                                                                                                                                                                                                                                                                                                                                                                                                                                                                                                                                                                                                                                                            |
|----------------------------------------------------------------|---------------------------------------------------------------------------------------------------------------------------------------------------------------------------------------------------------------------|--------------------------------------------------------------------------------------|--------------------------------------------------------------------------------------------------------------------------------------------------------------------------------------------------------------------------------------------------------------------------------------------------------------------------------------------------------------------------------------------------------------------------------------------------------------------------------------------------------------------------------------------------------------------------------------------------------------------------------------------------------------------------------------------------------------------------------------------------------------------------------------------------------------------------------------------|
| EP1_ISL_651238                                                 | University of Exeter                                                                                                                                                                                                | COVID-19 Genomics UK (COG-UK) Consortium                                             | Ben Temperton, Aaron Jeffries, Michelle Nielsen, Joana Warwick-Drysdale, Audrey Fardos, Robyn Manley, Stephen Mitchell, Jane Masoli                                                                                                                                                                                                                                                                                                                                                                                                                                                                                                                                                                                                                                                                                                        |
| EP1_ISL_651239                                                 | Liverpool Clinical Laboratories                                                                                                                                                                                     | COVID-19 Genomics UK (COG-UK) Consortium                                             | Sam Haldenby, Anita Lucada, Steve Paterson, Julian Hiscox, Alistair Darby, M Armsaud, A Alvezzahi, Muhammad Aruwalli, Stuart D Armstrong, Jones Benjamin, Eleanor G Bentley, Anu Chawla, Jordan J Clark, Angela Cowell, Richard Eccles, Isabel Garcia-Donval, Matthew Gemmill, Alessandro Gerada, PFR Gilmore, Richard Gregory, Ximeng Han, Catherine Hartley, Margaret Hughes, Mirien Iurizza-Gomara, James Johnson, L Liu, Jennifer Manson, Charlotte Nelson, Elaine O'Toole, Cassie Olatelu, Rebekah Penrice-Randall, Lucille Randox, N P Randle, Trevor Ian Robinson, Parul Sharma, Ghada T Shawil, James P Stewart, Neil Swainston, Ecaterina Varnos, Joanne Wats, Mark Whitehead                                                                                                                                                     |
| EP1_ISL_651247                                                 | Quadram Institute Bioscience                                                                                                                                                                                        | COVID-19 Genomics UK (COG-UK) Consortium                                             | Dave J Baker, Gemma L Kay, Alp Aydin, Thanh Le-Viet, Steven Rudder, Ana P. Tedim, Anastasiia Kolyva, Maria Diaz, Leonardo de Oliveira Martins, Nabil-Fareed Alkhan, Lizzie Meadows, Rachael Stanley, Nguzi Elnurugo, Muhammad Yasir, Nicholas M. Thomson, Alexander J Trotter, Rachel Gilroy, Samuel Bloomfield, Claire Stuart, Andrew Bell, Reenesh Prakash, Sami Dervisevic, Alison E. Malher, John Wain, Mark Webber, Andrew J Page, Justin O'Grady                                                                                                                                                                                                                                                                                                                                                                                     |
| EP1_ISL_651248                                                 | Liverpool Clinical Laboratories                                                                                                                                                                                     | COVID-19 Genomics UK (COG-UK) Consortium                                             | Sam Haldenby, Anita Lucada, Steve Paterson, Julian Hiscox, Alistair Darby, M Armsaud, A Alvezzahi, Muhammad Aruwalli, Stuart D Armstrong, Jones Benjamin, Eleanor G Bentley, Anu Chawla, Jordan J Clark, Angela Cowell, Richard Eccles, Isabel Garcia-Donval, Matthew Gemmill, Alessandro Gerada, PFR Gilmore, Richard Gregory, Ximeng Han, Catherine Hartley, Margaret Hughes, Mirien Iurizza-Gomara, James Johnson, L Liu, Jennifer Manson, Charlotte Nelson, Elaine O'Toole, Cassie Olatelu, Rebekah Penrice-Randall, Lucille Randox, N P Randle, Trevor Ian Robinson, Parul Sharma, Ghada T Shawil, James P Stewart, Neil Swainston, Ecaterina Varnos, Joanne Wats, Mark Whitehead                                                                                                                                                     |
| EP1_ISL_651250, EP1_ISL_651252                                 | Quadram Institute Bioscience                                                                                                                                                                                        | COVID-19 Genomics UK (COG-UK) Consortium                                             | Dave J Baker, Gemma L Kay, Alp Aydin, Thanh Le-Viet, Steven Rudder, Ana P. Tedim, Anastasiia Kolyva, Maria Diaz, Leonardo de Oliveira Martins, Nabil-Fareed Alkhan, Lizzie Meadows, Rachael Stanley, Nguzi Elnurugo, Muhammad Yasir, Nicholas M. Thomson, Alexander J Trotter, Rachel Gilroy, Samuel Bloomfield, Claire Stuart, Andrew Bell, Reenesh Prakash, Sami Dervisevic, Alison E. Malher, John Wain, Mark Webber, Andrew J Page, Justin O'Grady                                                                                                                                                                                                                                                                                                                                                                                     |
| EP1_ISL_651265                                                 | Liverpool Clinical Laboratories                                                                                                                                                                                     | COVID-19 Genomics UK (COG-UK) Consortium                                             | Sam Haldenby, Anita Lucada, Steve Paterson, Julian Hiscox, Alistair Darby, M Armsaud, A Alvezzahi, Muhammad Aruwalli, Stuart D Armstrong, Jones Benjamin, Eleanor G Bentley, Anu Chawla, Jordan J Clark, Angela Cowell, Richard Eccles, Isabel Garcia-Donval, Matthew Gemmill, Alessandro Gerada, PFR Gilmore, Richard Gregory, Ximeng Han, Catherine Hartley, Margaret Hughes, Mirien Iurizza-Gomara, James Johnson, L Liu, Jennifer Manson, Charlotte Nelson, Elaine O'Toole, Cassie Olatelu, Rebekah Penrice-Randall, Lucille Randox, N P Randle, Trevor Ian Robinson, Parul Sharma, Ghada T Shawil, James P Stewart, Neil Swainston, Ecaterina Varnos, Joanne Wats, Mark Whitehead                                                                                                                                                     |
| EP1_ISL_651268                                                 | Quadram Institute Bioscience                                                                                                                                                                                        | COVID-19 Genomics UK (COG-UK) Consortium                                             | Dave J Baker, Gemma L Kay, Alp Aydin, Thanh Le-Viet, Steven Rudder, Ana P. Tedim, Anastasiia Kolyva, Maria Diaz, Leonardo de Oliveira Martins, Nabil-Fareed Alkhan, Lizzie Meadows, Rachael Stanley, Nguzi Elnurugo, Muhammad Yasir, Nicholas M. Thomson, Alexander J Trotter, Rachel Gilroy, Samuel Bloomfield, Claire Stuart, Andrew Bell, Reenesh Prakash, Sami Dervisevic, Alison E. Malher, John Wain, Mark Webber, Andrew J Page, Justin O'Grady                                                                                                                                                                                                                                                                                                                                                                                     |
| EP1_ISL_651269, EP1_ISL_651270, EP1_ISL_651272, EP1_ISL_651273 | Department of Pathology, University of Cambridge<br>Liverpool Clinical Laboratories                                                                                                                                 | COVID-19 Genomics UK (COG-UK) Consortium<br>COVID-19 Genomics UK (COG-UK) Consortium | Aminu S. Jatun, Yasmin Chaudhry, Grant Hall, Iliriana Georgiana, Myra Hosmilo, Martin D. Curran, Malte Prickett, Surendra Parmar, Ian Goodfellow<br>Sam Haldenby, Anita Lucada, Steve Paterson, Julian Hiscox, Alistair Darby, M Armsaud, A Alvezzahi, Muhammad Aruwalli, Stuart D Armstrong, Jones Benjamin, Eleanor G Bentley, Anu Chawla, Jordan J Clark, Angela Cowell, Richard Eccles, Isabel Garcia-Donval, Matthew Gemmill, Alessandro Gerada, PFR Gilmore, Richard Gregory, Ximeng Han, Catherine Hartley, Margaret Hughes, Mirien Iurizza-Gomara, James Johnson, L Liu, Jennifer Manson, Charlotte Nelson, Elaine O'Toole, Cassie Olatelu, Rebekah Penrice-Randall, Lucille Randox, N P Randle, Trevor Ian Robinson, Parul Sharma, Ghada T Shawil, James P Stewart, Neil Swainston, Ecaterina Varnos, Joanne Wats, Mark Whitehead |
| EP1_ISL_651280, EP1_ISL_651281                                 | Department of Pathology, University of Cambridge                                                                                                                                                                    | COVID-19 Genomics UK (COG-UK) Consortium                                             | Aminu S. Jatun, Yasmin Chaudhry, Grant Hall, Iliriana Georgiana, Myra Hosmilo, Martin D. Curran, Malte Prickett, Surendra Parmar, Ian Goodfellow                                                                                                                                                                                                                                                                                                                                                                                                                                                                                                                                                                                                                                                                                           |
| EP1_ISL_651289                                                 | Queens Medical Centre, Clinical Microbiology Department / Deepseq Nottingham<br>University of Exeter                                                                                                                | COVID-19 Genomics UK (COG-UK) Consortium                                             | Gemma Clark, Wendy Smith, Manjinder Khatk, Vicki M Fleming, Michelle M Ulster, Hannah Howson-Wells, Jonathan Ball, Patrick McCuire, Joseph Chappell, Theodoranis Tselentis, Nadine Holmes, Matthew Moore, Fai Sang, Johnny Debebe, Victoria Wright, Matthew Loose                                                                                                                                                                                                                                                                                                                                                                                                                                                                                                                                                                          |
| EP1_ISL_651293                                                 | Queens Medical Centre, Clinical Microbiology Department / Deepseq Nottingham                                                                                                                                        | COVID-19 Genomics UK (COG-UK) Consortium                                             | Ben Temperton, Aaron Jeffries, Michelle Nielsen, Joana Warwick-Drysdale, Audrey Fardos, Robyn Manley, Stephen Mitchell, Jane Masoli                                                                                                                                                                                                                                                                                                                                                                                                                                                                                                                                                                                                                                                                                                        |
| EP1_ISL_651294                                                 | Virology Department, Royal Infirmary of Edinburgh, NHS Lothian / School of Biological Sciences, University of Edinburgh / Institute of Genetics and Molecular Medicine, University of Edinburgh                     | COVID-19 Genomics UK (COG-UK) Consortium                                             | Gemma Clark, Wendy Smith, Manjinder Khatk, Vicki M Fleming, Michelle M Ulster, Hannah Howson-Wells, Jonathan Ball, Patrick McCuire, Joseph Chappell, Theodoranis Tselentis, Nadine Holmes, Matthew Moore, Fai Sang, Johnny Debebe, Victoria Wright, Matthew Loose                                                                                                                                                                                                                                                                                                                                                                                                                                                                                                                                                                          |
| EP1_ISL_651296, EP1_ISL_651297, EP1_ISL_651306, EP1_ISL_651307 | Liverpool Clinical Laboratories                                                                                                                                                                                     | COVID-19 Genomics UK (COG-UK) Consortium                                             | Sam Haldenby, Anita Lucada, Steve Paterson, Julian Hiscox, Alistair Darby, M Armsaud, A Alvezzahi, Muhammad Aruwalli, Stuart D Armstrong, Jones Benjamin, Eleanor G Bentley, Anu Chawla, Jordan J Clark, Angela Cowell, Richard Eccles, Isabel Garcia-Donval, Matthew Gemmill, Alessandro Gerada, PFR Gilmore, Richard Gregory, Ximeng Han, Catherine Hartley, Margaret Hughes, Mirien Iurizza-Gomara, James Johnson, L Liu, Jennifer Manson, Charlotte Nelson, Elaine O'Toole, Cassie Olatelu, Rebekah Penrice-Randall, Lucille Randox, N P Randle, Trevor Ian Robinson, Parul Sharma, Ghada T Shawil, James P Stewart, Neil Swainston, Ecaterina Varnos, Joanne Wats, Mark Whitehead                                                                                                                                                     |
| EP1_ISL_651309                                                 | Queens Medical Centre, Clinical Microbiology Department / Deepseq Nottingham                                                                                                                                        | COVID-19 Genomics UK (COG-UK) Consortium                                             | Gemma Clark, Wendy Smith, Manjinder Khatk, Vicki M Fleming, Michelle M Ulster, Hannah Howson-Wells, Jonathan Ball, Patrick McCuire, Joseph Chappell, Theodoranis Tselentis, Nadine Holmes, Matthew Moore, Fai Sang, Johnny Debebe, Victoria Wright, Matthew Loose                                                                                                                                                                                                                                                                                                                                                                                                                                                                                                                                                                          |
| EP1_ISL_651310                                                 | West of Scotland Specialist Virology Centre, NHSGGC / MRC-University of Glasgow Centre for Virus Research                                                                                                           | COVID-19 Genomics UK (COG-UK) Consortium                                             | Ana da Silva Filipe, Natasha Johnson, Kathy Smollett, Daniel Mair, Stephen Carmichael, Alice Boos, Lily Tong, Jenna Nichols, Kyriaki Nomiou, Sarah McDonald, Richard Orton, Joseph Hughes, Steenu Vaidhally, David L Robertson, Alexander Maclean, Roy Gurnson, Sharif Shaaban, Matthew Holden, Rachel Blacow, Guy Mollett, Kathy L, James Shephard, Antonia Ho, Emma Thomson                                                                                                                                                                                                                                                                                                                                                                                                                                                              |
| EP1_ISL_651312                                                 | Liverpool Clinical Laboratories                                                                                                                                                                                     | COVID-19 Genomics UK (COG-UK) Consortium                                             | Sam Haldenby, Anita Lucada, Steve Paterson, Julian Hiscox, Alistair Darby, M Armsaud, A Alvezzahi, Muhammad Aruwalli, Stuart D Armstrong, Jones Benjamin, Eleanor G Bentley, Anu Chawla, Jordan J Clark, Angela Cowell, Richard Eccles, Isabel Garcia-Donval, Matthew Gemmill, Alessandro Gerada, PFR Gilmore, Richard Gregory, Ximeng Han, Catherine Hartley, Margaret Hughes, Mirien Iurizza-Gomara, James Johnson, L Liu, Jennifer Manson, Charlotte Nelson, Elaine O'Toole, Cassie Olatelu, Rebekah Penrice-Randall, Lucille Randox, N P Randle, Trevor Ian Robinson, Parul Sharma, Ghada T Shawil, James P Stewart, Neil Swainston, Ecaterina Varnos, Joanne Wats, Mark Whitehead                                                                                                                                                     |
| EP1_ISL_651314                                                 | Northumbria University / South Tees Hospitals NHS Foundation Trust / North Cumbria Integrated Care NHS Foundation Trust / North Tees and Hartlepool NHS Foundation Trust / Newcastle Hospitals NHS Foundation Trust | COVID-19 Genomics UK (COG-UK) Consortium                                             | Darren L Smith, Andrew Nelson, Matthew Easton, Gieg R Young, Joshua Lon, John Allen, Mohammad A, Ting, Glise S Hoh, Gary Black, Wen C Yew, Lynn Dover, Paul Baker, Steve Liggett, Sarah Essex, Jane Greenaway, Debra Padgett, Olive Galham, Garren Scott, Edward Barton, Emma Swindells, Brendan Payne, Jennifer Collins, Yasir Tahra Gary Eltringham                                                                                                                                                                                                                                                                                                                                                                                                                                                                                      |
| EP1_ISL_651319                                                 | Liverpool Clinical Laboratories                                                                                                                                                                                     | COVID-19 Genomics UK (COG-UK) Consortium                                             | Sam Haldenby, Anita Lucada, Steve Paterson, Julian Hiscox, Alistair Darby, M Armsaud, A Alvezzahi, Muhammad Aruwalli, Stuart D Armstrong, Jones Benjamin, Eleanor G Bentley, Anu Chawla, Jordan J Clark, Angela Cowell, Richard Eccles, Isabel Garcia-Donval, Matthew Gemmill, Alessandro Gerada, PFR Gilmore, Richard Gregory, Ximeng Han, Catherine Hartley, Margaret Hughes, Mirien Iurizza-Gomara, James Johnson, L Liu, Jennifer Manson, Charlotte Nelson, Elaine O'Toole, Cassie Olatelu, Rebekah Penrice-Randall, Lucille Randox, N P Randle, Trevor Ian Robinson, Parul Sharma, Ghada T Shawil, James P Stewart, Neil Swainston, Ecaterina Varnos, Joanne Wats, Mark Whitehead                                                                                                                                                     |
| EP1_ISL_651322                                                 | Virology Department, Royal Infirmary of Edinburgh, NHS Lothian / School of Biological Sciences, University of Edinburgh / Institute of Genetics and Molecular Medicine, University of Edinburgh                     | COVID-19 Genomics UK (COG-UK) Consortium                                             | Dave J Baker, Gemma L Kay, Alp Aydin, Thanh Le-Viet, Steven Rudder, Ana P. Tedim, Anastasiia Kolyva, Maria Diaz, Leonardo de Oliveira Martins, Nabil-Fareed Alkhan, Lizzie Meadows, Rachael Stanley, Nguzi Elnurugo, Muhammad Yasir, Nicholas M. Thomson, Alexander J Trotter, Rachel Gilroy, Samuel Bloomfield, Claire Stuart, Andrew Bell, Reenesh Prakash, Sami Dervisevic, Alison E. Malher, John Wain, Mark Webber, Andrew J Page, Justin O'Grady                                                                                                                                                                                                                                                                                                                                                                                     |
| EP1_ISL_651324                                                 | Quadram Institute Bioscience                                                                                                                                                                                        | COVID-19 Genomics UK (COG-UK) Consortium                                             | Dave J Baker, Gemma L Kay, Alp Aydin, Thanh Le-Viet, Steven Rudder, Ana P. Tedim, Anastasiia Kolyva, Maria Diaz, Leonardo de Oliveira Martins, Nabil-Fareed Alkhan, Lizzie Meadows, Rachael Stanley, Nguzi Elnurugo, Muhammad Yasir, Nicholas M. Thomson, Alexander J Trotter, Rachel Gilroy, Samuel Bloomfield, Claire Stuart, Andrew Bell, Reenesh Prakash, Sami Dervisevic, Alison E. Malher, John Wain, Mark Webber, Andrew J Page, Justin O'Grady                                                                                                                                                                                                                                                                                                                                                                                     |





|                                                                                                                                                                                                                                                                                                                                                                                                                                                                                                                                                                                                                                                                                                                                                                                                                                                                                                                                                                                                                                                                                                                                                                                                                                                                                                                                                                                                                                                                                                                                                                                                                                                                                                                                                                                                                                                                                                                                                                                                                                                                                                                                                                                                                                                                                                                                                                                                                                                                                                                                                                                                                                                                                                                                                                                                                                                                                                                                                                                                                                                                                                                                                                                                                                                                                                                                                                                                                                                                                                                                                                                                                                                                                                                                                                                                                                                                                                                                                                                                                                                                                                                                                                                                                                                                                                                                                                                                                |                                                                                                                                                                                                 |                                          |                                                                                                                                                                                                                                                                                                                                                                                                                                                                                                                                                                                                                                                                                    |
|----------------------------------------------------------------------------------------------------------------------------------------------------------------------------------------------------------------------------------------------------------------------------------------------------------------------------------------------------------------------------------------------------------------------------------------------------------------------------------------------------------------------------------------------------------------------------------------------------------------------------------------------------------------------------------------------------------------------------------------------------------------------------------------------------------------------------------------------------------------------------------------------------------------------------------------------------------------------------------------------------------------------------------------------------------------------------------------------------------------------------------------------------------------------------------------------------------------------------------------------------------------------------------------------------------------------------------------------------------------------------------------------------------------------------------------------------------------------------------------------------------------------------------------------------------------------------------------------------------------------------------------------------------------------------------------------------------------------------------------------------------------------------------------------------------------------------------------------------------------------------------------------------------------------------------------------------------------------------------------------------------------------------------------------------------------------------------------------------------------------------------------------------------------------------------------------------------------------------------------------------------------------------------------------------------------------------------------------------------------------------------------------------------------------------------------------------------------------------------------------------------------------------------------------------------------------------------------------------------------------------------------------------------------------------------------------------------------------------------------------------------------------------------------------------------------------------------------------------------------------------------------------------------------------------------------------------------------------------------------------------------------------------------------------------------------------------------------------------------------------------------------------------------------------------------------------------------------------------------------------------------------------------------------------------------------------------------------------------------------------------------------------------------------------------------------------------------------------------------------------------------------------------------------------------------------------------------------------------------------------------------------------------------------------------------------------------------------------------------------------------------------------------------------------------------------------------------------------------------------------------------------------------------------------------------------------------------------------------------------------------------------------------------------------------------------------------------------------------------------------------------------------------------------------------------------------------------------------------------------------------------------------------------------------------------------------------------------------------------------------------------------------------------------|-------------------------------------------------------------------------------------------------------------------------------------------------------------------------------------------------|------------------------------------------|------------------------------------------------------------------------------------------------------------------------------------------------------------------------------------------------------------------------------------------------------------------------------------------------------------------------------------------------------------------------------------------------------------------------------------------------------------------------------------------------------------------------------------------------------------------------------------------------------------------------------------------------------------------------------------|
| EPI_ISL_651394, EPI_ISL_651395                                                                                                                                                                                                                                                                                                                                                                                                                                                                                                                                                                                                                                                                                                                                                                                                                                                                                                                                                                                                                                                                                                                                                                                                                                                                                                                                                                                                                                                                                                                                                                                                                                                                                                                                                                                                                                                                                                                                                                                                                                                                                                                                                                                                                                                                                                                                                                                                                                                                                                                                                                                                                                                                                                                                                                                                                                                                                                                                                                                                                                                                                                                                                                                                                                                                                                                                                                                                                                                                                                                                                                                                                                                                                                                                                                                                                                                                                                                                                                                                                                                                                                                                                                                                                                                                                                                                                                                 | Virology Department, Royal Infirmary of Edinburgh, NHS Lothian / School of Biological Sciences, University of Edinburgh / Institute of Genetics and Molecular Medicine, University of Edinburgh | COVID-19 Genomics UK (COG-UK) Consortium | McHugh M, Dewar R, Rooke S, Gallagher M, Balceaza C, O'Toole A, Scheer E, Hill V, McCrone JT, Colquhoun R, Yu X, Jackson B, Rambaut A, Williams TC, Templeton K                                                                                                                                                                                                                                                                                                                                                                                                                                                                                                                    |
| EPI_ISL_651402                                                                                                                                                                                                                                                                                                                                                                                                                                                                                                                                                                                                                                                                                                                                                                                                                                                                                                                                                                                                                                                                                                                                                                                                                                                                                                                                                                                                                                                                                                                                                                                                                                                                                                                                                                                                                                                                                                                                                                                                                                                                                                                                                                                                                                                                                                                                                                                                                                                                                                                                                                                                                                                                                                                                                                                                                                                                                                                                                                                                                                                                                                                                                                                                                                                                                                                                                                                                                                                                                                                                                                                                                                                                                                                                                                                                                                                                                                                                                                                                                                                                                                                                                                                                                                                                                                                                                                                                 | West of Scotland Specialist Virology Centre, NHS/SGGC / MRC-University of Glasgow Centre for Virus Research                                                                                     | COVID-19 Genomics UK (COG-UK) Consortium | Ana da Silva Filipe, Natasha Johnson, Kathy Snodlett, Daniel Mair, Stephen Carmichael, Alice Broos, Lily Tong, Jenna Nichols, Kyraki Nomiou, Sarah McDonald, Richard Orton, Joseph Hughes, Steenu Vaidikally, David L Robertson, Alasdair Maclean, Roy Gunnson, Sharif Shaaban, Matthew Holden, Rachel Blacow, Guy Mollett, Kathy L, James Shepherd, Antonia Ho, Emma Thomson                                                                                                                                                                                                                                                                                                      |
| EPI_ISL_651408                                                                                                                                                                                                                                                                                                                                                                                                                                                                                                                                                                                                                                                                                                                                                                                                                                                                                                                                                                                                                                                                                                                                                                                                                                                                                                                                                                                                                                                                                                                                                                                                                                                                                                                                                                                                                                                                                                                                                                                                                                                                                                                                                                                                                                                                                                                                                                                                                                                                                                                                                                                                                                                                                                                                                                                                                                                                                                                                                                                                                                                                                                                                                                                                                                                                                                                                                                                                                                                                                                                                                                                                                                                                                                                                                                                                                                                                                                                                                                                                                                                                                                                                                                                                                                                                                                                                                                                                 | Queens Medical Centre, Clinical Microbiology Department / DeepSeq Nottingham                                                                                                                    | COVID-19 Genomics UK (COG-UK) Consortium | Gemma Clark, Wendy Smith, Manjinder Khatkhat, Vicki M Fleming, Michelle M Lister, Hannah Howson-Weils, Jonathan Ball, Patrick McCuire, Joseph Chappell, Theocharis Tseliordis, Nadine Holmes, Matthew Carlisle, Christopher Moore, Fai Sang, Johnny Debebe, Victoria Wright, Matthew Loose                                                                                                                                                                                                                                                                                                                                                                                         |
| EPI_ISL_651410                                                                                                                                                                                                                                                                                                                                                                                                                                                                                                                                                                                                                                                                                                                                                                                                                                                                                                                                                                                                                                                                                                                                                                                                                                                                                                                                                                                                                                                                                                                                                                                                                                                                                                                                                                                                                                                                                                                                                                                                                                                                                                                                                                                                                                                                                                                                                                                                                                                                                                                                                                                                                                                                                                                                                                                                                                                                                                                                                                                                                                                                                                                                                                                                                                                                                                                                                                                                                                                                                                                                                                                                                                                                                                                                                                                                                                                                                                                                                                                                                                                                                                                                                                                                                                                                                                                                                                                                 | Regional Virus Laboratory, Belfast Health and Social Care Trust                                                                                                                                 | COVID-19 Genomics UK (COG-UK) Consortium | Corral McCaughey, James McKenna, Tanya Curran, Susan Feeley, Alison Watt, Clara Cox, Maliead Connr, Zolan Mohar, David Simpson, Derek Fallery                                                                                                                                                                                                                                                                                                                                                                                                                                                                                                                                      |
| EPI_ISL_651414                                                                                                                                                                                                                                                                                                                                                                                                                                                                                                                                                                                                                                                                                                                                                                                                                                                                                                                                                                                                                                                                                                                                                                                                                                                                                                                                                                                                                                                                                                                                                                                                                                                                                                                                                                                                                                                                                                                                                                                                                                                                                                                                                                                                                                                                                                                                                                                                                                                                                                                                                                                                                                                                                                                                                                                                                                                                                                                                                                                                                                                                                                                                                                                                                                                                                                                                                                                                                                                                                                                                                                                                                                                                                                                                                                                                                                                                                                                                                                                                                                                                                                                                                                                                                                                                                                                                                                                                 | Virology Department, Sheffield Teaching Hospitals NHS Foundation Trust/Department of Infection, Immunity and Cardiovascular Disease, The Medical School, University of Sheffield                | COVID-19 Genomics UK (COG-UK) Consortium | Thushan de Silva, Matthew Parker, Nikki Smith, Adri Angyal, Rebecca Brown, Luke Green, Rachel Tucker, Paul Parsons, Danielle Groves, Katie Johnson, Laura Carriero, Alex Keesley, Dave Partridge, Matthew Wyles, Benjamin Lindsey, Mehmet Yavuz, Mohammad Raza, Catlad Evans                                                                                                                                                                                                                                                                                                                                                                                                       |
| EPI_ISL_651416                                                                                                                                                                                                                                                                                                                                                                                                                                                                                                                                                                                                                                                                                                                                                                                                                                                                                                                                                                                                                                                                                                                                                                                                                                                                                                                                                                                                                                                                                                                                                                                                                                                                                                                                                                                                                                                                                                                                                                                                                                                                                                                                                                                                                                                                                                                                                                                                                                                                                                                                                                                                                                                                                                                                                                                                                                                                                                                                                                                                                                                                                                                                                                                                                                                                                                                                                                                                                                                                                                                                                                                                                                                                                                                                                                                                                                                                                                                                                                                                                                                                                                                                                                                                                                                                                                                                                                                                 | Wales Specialist Virology Centre Sequencing lab: Pathogen Genomics Unit                                                                                                                         | COVID-19 Genomics UK (COG-UK) Consortium | Catherine Moore, Johnathan Evans, Laura Gilford, Malorie Perry, Simon Cottrell, Angela Merchbank, Alec Bitchley, Alexander Adams, Amy Gaskin, Bree Galica-Wilcox, Jason Coombes, Joel Soutiggate, Lauren Gilbert, Lee Graham, Nicole Paschian, Sara Kunzrath-Summerhayes, Sarah Taylor, Sophie Jones, Sara Ray, Matthew Bull, Joanne Watkins, Sally Corden, Tom Connor                                                                                                                                                                                                                                                                                                             |
| EPI_ISL_651421                                                                                                                                                                                                                                                                                                                                                                                                                                                                                                                                                                                                                                                                                                                                                                                                                                                                                                                                                                                                                                                                                                                                                                                                                                                                                                                                                                                                                                                                                                                                                                                                                                                                                                                                                                                                                                                                                                                                                                                                                                                                                                                                                                                                                                                                                                                                                                                                                                                                                                                                                                                                                                                                                                                                                                                                                                                                                                                                                                                                                                                                                                                                                                                                                                                                                                                                                                                                                                                                                                                                                                                                                                                                                                                                                                                                                                                                                                                                                                                                                                                                                                                                                                                                                                                                                                                                                                                                 | Oxford Viroemics, NDM, University of Oxford; Oxford University Hospitals, Baingsstoke and North Hampshire Hospital                                                                              | COVID-19 Genomics UK (COG-UK) Consortium | Tanya Golubchik, David Bonsall, George MacIntyre, Amy Tribes, Mariateresa de Cesate, Cairn Moore, Alex Mobbs, Aris Justice, Robert Shaw, Monique Anderson, Timothy Pezo, Emma Wiese, Nathan Moore, Jessica Lynch, Nick Cortes, Malilde Mori, Stephen Kidd, David Buck, John Todd, Christophe Fraser                                                                                                                                                                                                                                                                                                                                                                                |
| EPI_ISL_651430                                                                                                                                                                                                                                                                                                                                                                                                                                                                                                                                                                                                                                                                                                                                                                                                                                                                                                                                                                                                                                                                                                                                                                                                                                                                                                                                                                                                                                                                                                                                                                                                                                                                                                                                                                                                                                                                                                                                                                                                                                                                                                                                                                                                                                                                                                                                                                                                                                                                                                                                                                                                                                                                                                                                                                                                                                                                                                                                                                                                                                                                                                                                                                                                                                                                                                                                                                                                                                                                                                                                                                                                                                                                                                                                                                                                                                                                                                                                                                                                                                                                                                                                                                                                                                                                                                                                                                                                 | Liverpool Clinical Laboratories                                                                                                                                                                 | COVID-19 Genomics UK (COG-UK) Consortium | Sam Helderby, Anita Lucadi, Steve Paterson, Julian Hiscox, Alistar Darcy, M Armsaud, A Alvezahi, Muhammad Aruwalli, Stuart D Armstrong, Jones Benjamin, Eleanor G Bentley, Anu Chawla, Jordan J Clark, Angela Cowell, Richard Eccles, Isabel Garcia-Dorival, Matthew Gemmel, Alessandro Gerada, PFR Gilmore, Richard Gregory, Ximeng Han, Catherine Hartley, Margaret Hughes, Wilen Iurizza-Gomara, James Johnson, L Luu, Jennifer Manson, Charlotte Nelson, Elaine O'Toole, Cassie Olatelu, Rebekah Penrice-Randall, Lucile Rambow, N P Randle, Trevor Ian Robinson, Parul Sharma, Ghada T Shawil, James P Stewart, Neil Swainston, Ecaterina Varnos, Joanne Wats, Mark Whitehead |
| EPI_ISL_651514                                                                                                                                                                                                                                                                                                                                                                                                                                                                                                                                                                                                                                                                                                                                                                                                                                                                                                                                                                                                                                                                                                                                                                                                                                                                                                                                                                                                                                                                                                                                                                                                                                                                                                                                                                                                                                                                                                                                                                                                                                                                                                                                                                                                                                                                                                                                                                                                                                                                                                                                                                                                                                                                                                                                                                                                                                                                                                                                                                                                                                                                                                                                                                                                                                                                                                                                                                                                                                                                                                                                                                                                                                                                                                                                                                                                                                                                                                                                                                                                                                                                                                                                                                                                                                                                                                                                                                                                 | Virology Department, Sheffield Teaching Hospitals NHS Foundation Trust/Department of Infection, Immunity and Cardiovascular Disease, The Medical School, University of Sheffield                | COVID-19 Genomics UK (COG-UK) Consortium | Thushan de Silva, Matthew Parker, Nikki Smith, Adri Angyal, Rebecca Brown, Luke Green, Rachel Tucker, Paul Parsons, Danielle Groves, Katie Johnson, Laura Carriero, Alex Keesley, Dave Partridge, Matthew Wyles, Benjamin Lindsey, Mehmet Yavuz, Mohammad Raza, Catlad Evans                                                                                                                                                                                                                                                                                                                                                                                                       |
| EPI_ISL_651515, EPI_ISL_651516                                                                                                                                                                                                                                                                                                                                                                                                                                                                                                                                                                                                                                                                                                                                                                                                                                                                                                                                                                                                                                                                                                                                                                                                                                                                                                                                                                                                                                                                                                                                                                                                                                                                                                                                                                                                                                                                                                                                                                                                                                                                                                                                                                                                                                                                                                                                                                                                                                                                                                                                                                                                                                                                                                                                                                                                                                                                                                                                                                                                                                                                                                                                                                                                                                                                                                                                                                                                                                                                                                                                                                                                                                                                                                                                                                                                                                                                                                                                                                                                                                                                                                                                                                                                                                                                                                                                                                                 | Quadram Institute Bioscience                                                                                                                                                                    | COVID-19 Genomics UK (COG-UK) Consortium | Dave J Baker, Gemma L Kay, Alp Aydin, Thanh Le-Viet, Steven Rudder, Ara P, Tedin, Anastasia Kolyva, Maria Diaz, Leonardo de Oliveira Martins, Nabih-Fareed Alkhran, Lezlie Meadows, Rachael Stanley, Nguzi Elmurogo, Muhammad Yasir, Nicholas M, Thomson, Alexander J Trotter, Rachel Gilroy, Samuel Bloomfield, Claire Stuart, Andrew Bell, Reeneesh Prakash, Sami Dervisevic, Alison E, Mather, John Wann, Mark Webber, Andrew J Page, Justin O'Grady                                                                                                                                                                                                                            |
| EPI_ISL_651528                                                                                                                                                                                                                                                                                                                                                                                                                                                                                                                                                                                                                                                                                                                                                                                                                                                                                                                                                                                                                                                                                                                                                                                                                                                                                                                                                                                                                                                                                                                                                                                                                                                                                                                                                                                                                                                                                                                                                                                                                                                                                                                                                                                                                                                                                                                                                                                                                                                                                                                                                                                                                                                                                                                                                                                                                                                                                                                                                                                                                                                                                                                                                                                                                                                                                                                                                                                                                                                                                                                                                                                                                                                                                                                                                                                                                                                                                                                                                                                                                                                                                                                                                                                                                                                                                                                                                                                                 | Queens Medical Centre, Clinical Microbiology Department / DeepSeq Nottingham                                                                                                                    | COVID-19 Genomics UK (COG-UK) Consortium | Gemma Clark, Wendy Smith, Manjinder Khatkhat, Vicki M Fleming, Michelle M Lister, Hannah Howson-Weils, Jonathan Ball, Patrick McCuire, Joseph Chappell, Theocharis Tseliordis, Nadine Holmes, Matthew Carlisle, Christopher Moore, Fai Sang, Johnny Debebe, Victoria Wright, Matthew Loose                                                                                                                                                                                                                                                                                                                                                                                         |
| EPI_ISL_651529                                                                                                                                                                                                                                                                                                                                                                                                                                                                                                                                                                                                                                                                                                                                                                                                                                                                                                                                                                                                                                                                                                                                                                                                                                                                                                                                                                                                                                                                                                                                                                                                                                                                                                                                                                                                                                                                                                                                                                                                                                                                                                                                                                                                                                                                                                                                                                                                                                                                                                                                                                                                                                                                                                                                                                                                                                                                                                                                                                                                                                                                                                                                                                                                                                                                                                                                                                                                                                                                                                                                                                                                                                                                                                                                                                                                                                                                                                                                                                                                                                                                                                                                                                                                                                                                                                                                                                                                 | Oxford Viroemics, NDM, University of Oxford; Oxford University Hospitals, Baingsstoke and North Hampshire Hospital                                                                              | COVID-19 Genomics UK (COG-UK) Consortium | Tanya Golubchik, David Bonsall, George MacIntyre, Amy Tribes, Mariateresa de Cesate, Cairn Moore, Alex Mobbs, Aris Justice, Robert Shaw, Monique Anderson, Timothy Pezo, Emma Wiese, Nathan Moore, Jessica Lynch, Nick Cortes, Malilde Mori, Stephen Kidd, David Buck, John Todd, Christophe Fraser                                                                                                                                                                                                                                                                                                                                                                                |
| EPI_ISL_651531, EPI_ISL_651532, EPI_ISL_651533, EPI_ISL_651534, EPI_ISL_651535, EPI_ISL_651536, EPI_ISL_651537, EPI_ISL_651538, EPI_ISL_651539, EPI_ISL_651540                                                                                                                                                                                                                                                                                                                                                                                                                                                                                                                                                                                                                                                                                                                                                                                                                                                                                                                                                                                                                                                                                                                                                                                                                                                                                                                                                                                                                                                                                                                                                                                                                                                                                                                                                                                                                                                                                                                                                                                                                                                                                                                                                                                                                                                                                                                                                                                                                                                                                                                                                                                                                                                                                                                                                                                                                                                                                                                                                                                                                                                                                                                                                                                                                                                                                                                                                                                                                                                                                                                                                                                                                                                                                                                                                                                                                                                                                                                                                                                                                                                                                                                                                                                                                                                 | West of Scotland Specialist Virology Centre, NHS/SGGC / MRC-University of Glasgow Centre for Virus Research                                                                                     | COVID-19 Genomics UK (COG-UK) Consortium | Ana da Silva Filipe, Natasha Johnson, Kathy Snodlett, Daniel Mair, Stephen Carmichael, Alice Broos, Lily Tong, Jenna Nichols, Kyraki Nomiou, Sarah McDonald, Richard Orton, Joseph Hughes, Steenu Vaidikally, David L Robertson, Alasdair Maclean, Roy Gunnson, Sharif Shaaban, Matthew Holden, Rachel Blacow, Guy Mollett, Kathy L, James Shepherd, Antonia Ho, Emma Thomson                                                                                                                                                                                                                                                                                                      |
| EPI_ISL_651541                                                                                                                                                                                                                                                                                                                                                                                                                                                                                                                                                                                                                                                                                                                                                                                                                                                                                                                                                                                                                                                                                                                                                                                                                                                                                                                                                                                                                                                                                                                                                                                                                                                                                                                                                                                                                                                                                                                                                                                                                                                                                                                                                                                                                                                                                                                                                                                                                                                                                                                                                                                                                                                                                                                                                                                                                                                                                                                                                                                                                                                                                                                                                                                                                                                                                                                                                                                                                                                                                                                                                                                                                                                                                                                                                                                                                                                                                                                                                                                                                                                                                                                                                                                                                                                                                                                                                                                                 | Oxford Viroemics, NDM, University of Oxford; Oxford University Hospitals, Baingsstoke and North Hampshire Hospital                                                                              | COVID-19 Genomics UK (COG-UK) Consortium | Tanya Golubchik, David Bonsall, George MacIntyre, Amy Tribes, Mariateresa de Cesate, Cairn Moore, Alex Mobbs, Aris Justice, Robert Shaw, Monique Anderson, Timothy Pezo, Emma Wiese, Nathan Moore, Jessica Lynch, Nick Cortes, Malilde Mori, Stephen Kidd, David Buck, John Todd, Christophe Fraser                                                                                                                                                                                                                                                                                                                                                                                |
| EPI_ISL_651583                                                                                                                                                                                                                                                                                                                                                                                                                                                                                                                                                                                                                                                                                                                                                                                                                                                                                                                                                                                                                                                                                                                                                                                                                                                                                                                                                                                                                                                                                                                                                                                                                                                                                                                                                                                                                                                                                                                                                                                                                                                                                                                                                                                                                                                                                                                                                                                                                                                                                                                                                                                                                                                                                                                                                                                                                                                                                                                                                                                                                                                                                                                                                                                                                                                                                                                                                                                                                                                                                                                                                                                                                                                                                                                                                                                                                                                                                                                                                                                                                                                                                                                                                                                                                                                                                                                                                                                                 | West of Scotland Specialist Virology Centre, NHS/SGGC / MRC-University of Glasgow Centre for Virus Research                                                                                     | COVID-19 Genomics UK (COG-UK) Consortium | Ana da Silva Filipe, Natasha Johnson, Kathy Snodlett, Daniel Mair, Stephen Carmichael, Alice Broos, Lily Tong, Jenna Nichols, Kyraki Nomiou, Sarah McDonald, Richard Orton, Joseph Hughes, Steenu Vaidikally, David L Robertson, Alasdair Maclean, Roy Gunnson, Sharif Shaaban, Matthew Holden, Rachel Blacow, Guy Mollett, Kathy L, James Shepherd, Antonia Ho, Emma Thomson                                                                                                                                                                                                                                                                                                      |
| EPI_ISL_651588                                                                                                                                                                                                                                                                                                                                                                                                                                                                                                                                                                                                                                                                                                                                                                                                                                                                                                                                                                                                                                                                                                                                                                                                                                                                                                                                                                                                                                                                                                                                                                                                                                                                                                                                                                                                                                                                                                                                                                                                                                                                                                                                                                                                                                                                                                                                                                                                                                                                                                                                                                                                                                                                                                                                                                                                                                                                                                                                                                                                                                                                                                                                                                                                                                                                                                                                                                                                                                                                                                                                                                                                                                                                                                                                                                                                                                                                                                                                                                                                                                                                                                                                                                                                                                                                                                                                                                                                 | Quadram Institute Bioscience                                                                                                                                                                    | COVID-19 Genomics UK (COG-UK) Consortium | Dave J Baker, Gemma L Kay, Alp Aydin, Thanh Le-Viet, Steven Rudder, Ara P, Tedin, Anastasia Kolyva, Maria Diaz, Leonardo de Oliveira Martins, Nabih-Fareed Alkhran, Lezlie Meadows, Rachael Stanley, Nguzi Elmurogo, Muhammad Yasir, Nicholas M, Thomson, Alexander J Trotter, Rachel Gilroy, Samuel Bloomfield, Claire Stuart, Andrew Bell, Reeneesh Prakash, Sami Dervisevic, Alison E, Mather, John Wann, Mark Webber, Andrew J Page, Justin O'Grady                                                                                                                                                                                                                            |
| EPI_ISL_651589                                                                                                                                                                                                                                                                                                                                                                                                                                                                                                                                                                                                                                                                                                                                                                                                                                                                                                                                                                                                                                                                                                                                                                                                                                                                                                                                                                                                                                                                                                                                                                                                                                                                                                                                                                                                                                                                                                                                                                                                                                                                                                                                                                                                                                                                                                                                                                                                                                                                                                                                                                                                                                                                                                                                                                                                                                                                                                                                                                                                                                                                                                                                                                                                                                                                                                                                                                                                                                                                                                                                                                                                                                                                                                                                                                                                                                                                                                                                                                                                                                                                                                                                                                                                                                                                                                                                                                                                 | Wales Specialist Virology Centre Sequencing lab: Pathogen Genomics Unit                                                                                                                         | COVID-19 Genomics UK (COG-UK) Consortium | Catherine Moore, Johnathan Evans, Laura Gilford, Malorie Perry, Simon Cottrell, Angela Merchbank, Alec Bitchley, Alexander Adams, Amy Gaskin, Bree Galica-Wilcox, Jason Coombes, Joel Soutiggate, Lauren Gilbert, Lee Graham, Nicole Paschian, Sara Kunzrath-Summerhayes, Sarah Taylor, Sophie Jones, Sara Ray, Matthew Bull, Joanne Watkins, Sally Corden, Tom Connor                                                                                                                                                                                                                                                                                                             |
| see above                                                                                                                                                                                                                                                                                                                                                                                                                                                                                                                                                                                                                                                                                                                                                                                                                                                                                                                                                                                                                                                                                                                                                                                                                                                                                                                                                                                                                                                                                                                                                                                                                                                                                                                                                                                                                                                                                                                                                                                                                                                                                                                                                                                                                                                                                                                                                                                                                                                                                                                                                                                                                                                                                                                                                                                                                                                                                                                                                                                                                                                                                                                                                                                                                                                                                                                                                                                                                                                                                                                                                                                                                                                                                                                                                                                                                                                                                                                                                                                                                                                                                                                                                                                                                                                                                                                                                                                                      | University of Birmingham                                                                                                                                                                        | COVID-19 Genomics UK (COG-UK) Consortium | Institute of Microbiology, University of Birmingham, Claire McLauray, Joanne Stockton, Samuel Nicholas, Rodaslev Poplavski, Will Rowe, Josh Quirk, Nicholas Loman, University of Birmingham Testing Laboratory, Ceilina M Whalley, Andrew Bosworth, Charlotte Paxon, Kasun Vaniyasinghaya, Oliver Pickles, Mike Kidd, Alex Richter, Andrew D Beggs PHE Heartlands Lab, Husam Osman, Andrew Bosworth, Queen Elizabeth Hospital, Anna Casey                                                                                                                                                                                                                                          |
| see above                                                                                                                                                                                                                                                                                                                                                                                                                                                                                                                                                                                                                                                                                                                                                                                                                                                                                                                                                                                                                                                                                                                                                                                                                                                                                                                                                                                                                                                                                                                                                                                                                                                                                                                                                                                                                                                                                                                                                                                                                                                                                                                                                                                                                                                                                                                                                                                                                                                                                                                                                                                                                                                                                                                                                                                                                                                                                                                                                                                                                                                                                                                                                                                                                                                                                                                                                                                                                                                                                                                                                                                                                                                                                                                                                                                                                                                                                                                                                                                                                                                                                                                                                                                                                                                                                                                                                                                                      | Department of Pathology, University of Cambridge                                                                                                                                                | COVID-19 Genomics UK (COG-UK) Consortium | Aminu S. Jahun, Yasmin Chaudhry, Grant Hall, Iliana Georgiana, Myra Hosnillo, Martin D. Curran, Malte Frickert, Susendra Pamar, Ian Goodfellow                                                                                                                                                                                                                                                                                                                                                                                                                                                                                                                                     |
| EPI_ISL_651632, EPI_ISL_651633, EPI_ISL_651634, EPI_ISL_651635, EPI_ISL_651636, EPI_ISL_651637, EPI_ISL_651638, EPI_ISL_651639, EPI_ISL_651640, EPI_ISL_651641, EPI_ISL_651642, EPI_ISL_651643, EPI_ISL_651644, EPI_ISL_651645, EPI_ISL_651646, EPI_ISL_651647, EPI_ISL_651648, EPI_ISL_651651, EPI_ISL_651652                                                                                                                                                                                                                                                                                                                                                                                                                                                                                                                                                                                                                                                                                                                                                                                                                                                                                                                                                                                                                                                                                                                                                                                                                                                                                                                                                                                                                                                                                                                                                                                                                                                                                                                                                                                                                                                                                                                                                                                                                                                                                                                                                                                                                                                                                                                                                                                                                                                                                                                                                                                                                                                                                                                                                                                                                                                                                                                                                                                                                                                                                                                                                                                                                                                                                                                                                                                                                                                                                                                                                                                                                                                                                                                                                                                                                                                                                                                                                                                                                                                                                                 | Virology Department, Sheffield Teaching Hospitals NHS Foundation Trust/Department of Infection, Immunity and Cardiovascular Disease, The Medical School, University of Sheffield                | COVID-19 Genomics UK (COG-UK) Consortium | Thushan de Silva, Matthew Parker, Nikki Smith, Adri Angyal, Rebecca Brown, Luke Green, Rachel Tucker, Paul Parsons, Danielle Groves, Katie Johnson, Laura Carriero, Alex Keesley, Dave Partridge, Matthew Wyles, Benjamin Lindsey, Mehmet Yavuz, Mohammad Raza, Catlad Evans                                                                                                                                                                                                                                                                                                                                                                                                       |
| EPI_ISL_651656, EPI_ISL_651655, EPI_ISL_651656, EPI_ISL_651657, EPI_ISL_651658, EPI_ISL_651659, EPI_ISL_651660, EPI_ISL_651661, EPI_ISL_651662, EPI_ISL_651663, EPI_ISL_651664, EPI_ISL_651665, EPI_ISL_651666, EPI_ISL_651667, EPI_ISL_651668, EPI_ISL_651669, EPI_ISL_651670, EPI_ISL_651671, EPI_ISL_651672, EPI_ISL_651673                                                                                                                                                                                                                                                                                                                                                                                                                                                                                                                                                                                                                                                                                                                                                                                                                                                                                                                                                                                                                                                                                                                                                                                                                                                                                                                                                                                                                                                                                                                                                                                                                                                                                                                                                                                                                                                                                                                                                                                                                                                                                                                                                                                                                                                                                                                                                                                                                                                                                                                                                                                                                                                                                                                                                                                                                                                                                                                                                                                                                                                                                                                                                                                                                                                                                                                                                                                                                                                                                                                                                                                                                                                                                                                                                                                                                                                                                                                                                                                                                                                                                 | Department of Pathology, University of Cambridge                                                                                                                                                | COVID-19 Genomics UK (COG-UK) Consortium | Aminu S. Jahun, Yasmin Chaudhry, Grant Hall, Iliana Georgiana, Myra Hosnillo, Martin D. Curran, Malte Frickert, Susendra Pamar, Ian Goodfellow                                                                                                                                                                                                                                                                                                                                                                                                                                                                                                                                     |
| EPI_ISL_651716, EPI_ISL_651721, EPI_ISL_651722, EPI_ISL_651723                                                                                                                                                                                                                                                                                                                                                                                                                                                                                                                                                                                                                                                                                                                                                                                                                                                                                                                                                                                                                                                                                                                                                                                                                                                                                                                                                                                                                                                                                                                                                                                                                                                                                                                                                                                                                                                                                                                                                                                                                                                                                                                                                                                                                                                                                                                                                                                                                                                                                                                                                                                                                                                                                                                                                                                                                                                                                                                                                                                                                                                                                                                                                                                                                                                                                                                                                                                                                                                                                                                                                                                                                                                                                                                                                                                                                                                                                                                                                                                                                                                                                                                                                                                                                                                                                                                                                 | Virology Department, Sheffield Teaching Hospitals NHS Foundation Trust/Department of Infection, Immunity and Cardiovascular Disease, The Medical School, University of Sheffield                | COVID-19 Genomics UK (COG-UK) Consortium | Thushan de Silva, Matthew Parker, Nikki Smith, Adri Angyal, Rebecca Brown, Luke Green, Rachel Tucker, Paul Parsons, Danielle Groves, Katie Johnson, Laura Carriero, Alex Keesley, Dave Partridge, Matthew Wyles, Benjamin Lindsey, Mehmet Yavuz, Mohammad Raza, Catlad Evans                                                                                                                                                                                                                                                                                                                                                                                                       |
| see above                                                                                                                                                                                                                                                                                                                                                                                                                                                                                                                                                                                                                                                                                                                                                                                                                                                                                                                                                                                                                                                                                                                                                                                                                                                                                                                                                                                                                                                                                                                                                                                                                                                                                                                                                                                                                                                                                                                                                                                                                                                                                                                                                                                                                                                                                                                                                                                                                                                                                                                                                                                                                                                                                                                                                                                                                                                                                                                                                                                                                                                                                                                                                                                                                                                                                                                                                                                                                                                                                                                                                                                                                                                                                                                                                                                                                                                                                                                                                                                                                                                                                                                                                                                                                                                                                                                                                                                                      | West of Scotland Specialist Virology Centre, NHS/SGGC / MRC-University of Glasgow Centre for Virus Research                                                                                     | COVID-19 Genomics UK (COG-UK) Consortium | Ana da Silva Filipe, Natasha Johnson, Kathy Snodlett, Daniel Mair, Stephen Carmichael, Alice Broos, Lily Tong, Jenna Nichols, Kyraki Nomiou, Sarah McDonald, Richard Orton, Joseph Hughes, Steenu Vaidikally, David L Robertson, Alasdair Maclean, Roy Gunnson, Sharif Shaaban, Matthew Holden, Rachel Blacow, Guy Mollett, Kathy L, James Shepherd, Antonia Ho, Emma Thomson                                                                                                                                                                                                                                                                                                      |
| EPI_ISL_651734, EPI_ISL_651737, EPI_ISL_651738, EPI_ISL_651739, EPI_ISL_651740, EPI_ISL_651741, EPI_ISL_651742, EPI_ISL_651743, EPI_ISL_651744, EPI_ISL_651745, EPI_ISL_651746, EPI_ISL_651747, EPI_ISL_651748, EPI_ISL_651749, EPI_ISL_651750, EPI_ISL_651751, EPI_ISL_651752, EPI_ISL_651753, EPI_ISL_651754, EPI_ISL_651755, EPI_ISL_651756, EPI_ISL_651757, EPI_ISL_651758, EPI_ISL_651759, EPI_ISL_651760, EPI_ISL_651761, EPI_ISL_651762, EPI_ISL_651763, EPI_ISL_651764, EPI_ISL_651765, EPI_ISL_651766, EPI_ISL_651767, EPI_ISL_651768, EPI_ISL_651769, EPI_ISL_651770, EPI_ISL_651771, EPI_ISL_651772, EPI_ISL_651773, EPI_ISL_651774, EPI_ISL_651775, EPI_ISL_651776, EPI_ISL_651777, EPI_ISL_651778, EPI_ISL_651779, EPI_ISL_651780, EPI_ISL_651781, EPI_ISL_651782, EPI_ISL_651783, EPI_ISL_651784, EPI_ISL_651785, EPI_ISL_651786, EPI_ISL_651787, EPI_ISL_651788, EPI_ISL_651789, EPI_ISL_651790, EPI_ISL_651791, EPI_ISL_651792, EPI_ISL_651793, EPI_ISL_651794, EPI_ISL_651795, EPI_ISL_651796, EPI_ISL_651797, EPI_ISL_651798, EPI_ISL_651799, EPI_ISL_651800, EPI_ISL_651801, EPI_ISL_651802, EPI_ISL_651803, EPI_ISL_651804, EPI_ISL_651805, EPI_ISL_651806, EPI_ISL_651807, EPI_ISL_651808, EPI_ISL_651809, EPI_ISL_651810, EPI_ISL_651811, EPI_ISL_651812, EPI_ISL_651813, EPI_ISL_651814, EPI_ISL_651815, EPI_ISL_651816, EPI_ISL_651817, EPI_ISL_651818, EPI_ISL_651819, EPI_ISL_651820, EPI_ISL_651821, EPI_ISL_651822, EPI_ISL_651823, EPI_ISL_651824, EPI_ISL_651825, EPI_ISL_651826, EPI_ISL_651827, EPI_ISL_651828, EPI_ISL_651829, EPI_ISL_651830, EPI_ISL_651831, EPI_ISL_651832, EPI_ISL_651833, EPI_ISL_651834, EPI_ISL_651835, EPI_ISL_651836, EPI_ISL_651837, EPI_ISL_651838, EPI_ISL_651839, EPI_ISL_651840, EPI_ISL_651841, EPI_ISL_651842, EPI_ISL_651843, EPI_ISL_651844, EPI_ISL_651845, EPI_ISL_651846, EPI_ISL_651847, EPI_ISL_651848, EPI_ISL_651849, EPI_ISL_651850, EPI_ISL_651851, EPI_ISL_651852, EPI_ISL_651853, EPI_ISL_651854, EPI_ISL_651855, EPI_ISL_651856, EPI_ISL_651857, EPI_ISL_651858, EPI_ISL_651859, EPI_ISL_651860, EPI_ISL_651861, EPI_ISL_651862, EPI_ISL_651863, EPI_ISL_651864, EPI_ISL_651865, EPI_ISL_651866, EPI_ISL_651867, EPI_ISL_651868, EPI_ISL_651869, EPI_ISL_651870, EPI_ISL_651871, EPI_ISL_651872, EPI_ISL_651873, EPI_ISL_651874, EPI_ISL_651875, EPI_ISL_651876, EPI_ISL_651877, EPI_ISL_651878, EPI_ISL_651879, EPI_ISL_651880, EPI_ISL_651881, EPI_ISL_651882, EPI_ISL_651883, EPI_ISL_651884, EPI_ISL_651885, EPI_ISL_651886, EPI_ISL_651887, EPI_ISL_651888, EPI_ISL_651889, EPI_ISL_651890, EPI_ISL_651891, EPI_ISL_651892, EPI_ISL_651893, EPI_ISL_651894, EPI_ISL_651895, EPI_ISL_651896, EPI_ISL_651897, EPI_ISL_651898, EPI_ISL_651899, EPI_ISL_651900, EPI_ISL_651901, EPI_ISL_651902, EPI_ISL_651903, EPI_ISL_651904, EPI_ISL_651905, EPI_ISL_651906, EPI_ISL_651907, EPI_ISL_651908, EPI_ISL_651909, EPI_ISL_651910, EPI_ISL_651911, EPI_ISL_651912, EPI_ISL_651913, EPI_ISL_651914, EPI_ISL_651915, EPI_ISL_651916, EPI_ISL_651917, EPI_ISL_651918, EPI_ISL_651919, EPI_ISL_651920, EPI_ISL_651921, EPI_ISL_651922, EPI_ISL_651923, EPI_ISL_651924, EPI_ISL_651925, EPI_ISL_651926, EPI_ISL_651927, EPI_ISL_651928, EPI_ISL_651929, EPI_ISL_651930, EPI_ISL_651931, EPI_ISL_651932, EPI_ISL_651933, EPI_ISL_651934, EPI_ISL_651935, EPI_ISL_651936, EPI_ISL_651937, EPI_ISL_651938, EPI_ISL_651939, EPI_ISL_651940, EPI_ISL_651941, EPI_ISL_651942, EPI_ISL_651943, EPI_ISL_651944, EPI_ISL_651945, EPI_ISL_651946, EPI_ISL_651947, EPI_ISL_651948, EPI_ISL_651949, EPI_ISL_651950, EPI_ISL_651951, EPI_ISL_651952, EPI_ISL_651953, EPI_ISL_651954, EPI_ISL_651955, EPI_ISL_651956, EPI_ISL_651957, EPI_ISL_651958, EPI_ISL_651959, EPI_ISL_651960, EPI_ISL_651961, EPI_ISL_651962, EPI_ISL_651963, EPI_ISL_651964, EPI_ISL_651965, EPI_ISL_651966, EPI_ISL_651967, EPI_ISL_651968, EPI_ISL_651969, EPI_ISL_651970, EPI_ISL_651971, EPI_ISL_651972, EPI_ISL_651973, EPI_ISL_651974, EPI_ISL_651975, EPI_ISL_651976, EPI_ISL_651977, EPI_ISL_651978, EPI_ISL_651979, EPI_ISL_651980, EPI_ISL_651981, EPI_ISL_651982, EPI_ISL_651983, EPI_ISL_651984, EPI_ISL_651985, EPI_ISL_651986, EPI_ISL_651987, EPI_ISL_651988, EPI_ISL_651989, EPI_ISL_651990, EPI_ISL_651991, EPI_ISL_651992, EPI_ISL_651993, EPI_ISL_651994, EPI_ISL_651995, EPI_ISL_651996, EPI_ISL_651997, EPI_ISL_651998, EPI_ISL_651999, EPI_ISL_652000 | Department of Pathology, University of Cambridge                                                                                                                                                | COVID-19 Genomics UK (COG-UK) Consortium | Aminu S. Jahun, Yasmin Chaudhry, Grant Hall, Iliana Georgiana, Myra Hosnillo, Martin D. Curran, Malte Frickert, Susendra Pamar, Ian Goodfellow                                                                                                                                                                                                                                                                                                                                                                                                                                                                                                                                     |

EPI\_ISL\_651791, EPI\_ISL\_651792, EPI\_ISL\_651794, EPI\_ISL\_651805, EPI\_ISL\_651806, EPI\_ISL\_651808, EPI\_ISL\_651810

Lighthouse Lab in Glasgow / MRC-University of Glasgow Centre for Virus Research

COVID-19 Genomics UK (COG-UK) Consortium

Ana da Silva Filipe, Natasha Johnson, Kathy Snodlett, Daniel Mair, Stephen Carmichael, Alice Brooks, Lily Tong, Jenna Nicholls, Kyniki Nontikov, Sarah McDonnell, Harper Venetianou, Yumr Kasai, David Gray, Carol Clugston, Ana Dominguez, Alisdair MacLean, Rory Gunnerson, Richard Oton, Joseph Hughes, Stevan Valtipally, David L Robertson, Sharif Shaaban, Matthew Holden, Kathy L, James Shephard, Antonia Ho, Emma Thomson

EPI\_ISL\_651811, EPI\_ISL\_651813, EPI\_ISL\_651814, EPI\_ISL\_651815, EPI\_ISL\_651816, EPI\_ISL\_651817, EPI\_ISL\_651818, EPI\_ISL\_651819, EPI\_ISL\_651820, EPI\_ISL\_651821, EPI\_ISL\_651822, EPI\_ISL\_651823, EPI\_ISL\_651824, EPI\_ISL\_651825, EPI\_ISL\_651826, EPI\_ISL\_651827, EPI\_ISL\_651828, EPI\_ISL\_651829, EPI\_ISL\_651830, EPI\_ISL\_651831, EPI\_ISL\_651832, EPI\_ISL\_651833, EPI\_ISL\_651834, EPI\_ISL\_651835, EPI\_ISL\_651836, EPI\_ISL\_651837, EPI\_ISL\_651838, EPI\_ISL\_651839, EPI\_ISL\_651840, EPI\_ISL\_651841, EPI\_ISL\_651842, EPI\_ISL\_651843, EPI\_ISL\_651844, EPI\_ISL\_651845, EPI\_ISL\_651846, EPI\_ISL\_651851, EPI\_ISL\_651852, EPI\_ISL\_651853, EPI\_ISL\_651854, EPI\_ISL\_651855, EPI\_ISL\_651856, EPI\_ISL\_651857, EPI\_ISL\_651858, EPI\_ISL\_651861, EPI\_ISL\_651862, EPI\_ISL\_651863, EPI\_ISL\_651868, EPI\_ISL\_651889, EPI\_ISL\_651890, EPI\_ISL\_651891, EPI\_ISL\_651892, EPI\_ISL\_651893, EPI\_ISL\_651894, EPI\_ISL\_651900, EPI\_ISL\_651903, EPI\_ISL\_651904, EPI\_ISL\_651907, EPI\_ISL\_651908, EPI\_ISL\_651909, EPI\_ISL\_651911, EPI\_ISL\_651912, EPI\_ISL\_651913, EPI\_ISL\_651914, EPI\_ISL\_651917, EPI\_ISL\_651918, EPI\_ISL\_651919, EPI\_ISL\_651922, EPI\_ISL\_651923, EPI\_ISL\_651924, EPI\_ISL\_651925, EPI\_ISL\_651926, EPI\_ISL\_651932, EPI\_ISL\_651935, EPI\_ISL\_651936, EPI\_ISL\_651937, EPI\_ISL\_651938, EPI\_ISL\_651940, EPI\_ISL\_651944, EPI\_ISL\_651945, EPI\_ISL\_651947, EPI\_ISL\_651950, EPI\_ISL\_651951, EPI\_ISL\_651955, EPI\_ISL\_651956

West of Scotland Specialist Virus Centre, NHS-SCG / MRC-University of Glasgow Centre for Virus Research

COVID-19 Genomics UK (COG-UK) Consortium

Ana da Silva Filipe, Natasha Johnson, Kathy Snodlett, Daniel Mair, Stephen Carmichael, Alice Brooks, Lily Tong, Jenna Nicholls, Kyniki Nontikov, Sarah McDonnell, Richard Oton, Joseph Hughes, Stevan Valtipally, David L Robertson, Alisdair MacLean, Rory Gunnerson, Sharif Shaaban, Matthew Holden, Rachel Blackow, Guy Mollett, Kathy L, James Shephard, Antonia Ho, Emma Thomson

EPI\_ISL\_652067, EPI\_ISL\_652068, EPI\_ISL\_652069, EPI\_ISL\_652070, EPI\_ISL\_652071, EPI\_ISL\_652072

Virology Department, Royal Infirmary of Edinburgh NHS Forthran / School of Biological Sciences, University of Edinburgh / Institute of Molecular Medicine, University of Edinburgh

COVID-19 Genomics UK (COG-UK) Consortium

Institute of Microbiology, University of Birmingham; Claire McMurray, Joanne Stockton, Samuel Nicholls, Radoslaw Poprawski, Will Rowe, Josh Quirk, Nicholas Loman, University of Birmingham Testing Laboratory, Ceina M Whalley, Andrew Bosworth, Charlotte Poxon, Kasun Wangasooriya, Oliver Pickles, Mike Kidd, Alex Richter, Andrew D Baggs PHE Heartlands Lab, Husam Osman, Andrew Bosworth, Queen Elizabeth Hospital, Anna Casey

EPI\_ISL\_652074, EPI\_ISL\_652076, EPI\_ISL\_652078, EPI\_ISL\_652079, EPI\_ISL\_652080, EPI\_ISL\_652081, EPI\_ISL\_652082, EPI\_ISL\_652083, EPI\_ISL\_652084, EPI\_ISL\_652085, EPI\_ISL\_652086, EPI\_ISL\_652088, EPI\_ISL\_652089, EPI\_ISL\_652098, EPI\_ISL\_652100, EPI\_ISL\_652101, EPI\_ISL\_652102

Liverpool Clinical Laboratories

COVID-19 Genomics UK (COG-UK) Consortium

Sam Haldeney, Anlia Lucaci, Steve Paterson, Julian Hiscox, Alistair Darby, M Airnaud, A Alvezahli, Muhammad Alruwaili, Stuart D Armstrong, Jones Benjamin, Eleanor G Bentley, Anu Chawla, Jordan Clark, Angela Cowell, Richard Eccles, Isabel Garcia-Orvial, Matthew Gemmill, Alessandro Gerada, PKE Gilmore, Richard Gregory, Ximing Han, Catherine Hartley, Margaret Hughes, Mirren Iturriza-Gomara, James Johnson, Li Liu, Jennifer Mansson, Chandice Nelson, Elaine O'Toole, Cassie Olafalu, Rebekah Penrice-Randall, Lucille Harboux, NP Pariente, Trevor Ian Robinson, Paul Sharma, Ghada T Shawli, James P Stewart, Neil Swanson, Exaterna Vamos, Joanne Waits, Mark Whitehead

EPI\_ISL\_652096, EPI\_ISL\_652097, EPI\_ISL\_652098, EPI\_ISL\_652099, EPI\_ISL\_652100, EPI\_ISL\_652101, EPI\_ISL\_652102

see above

COVID-19 Genomics UK (COG-UK) Consortium

Angela Beckett, Yann Bourgeois, Garry Scarlett, Sharon Glaysler, Scott Elliott, Kelly Becknell, Robert Impy, Alysson Loyd, Sarah Wylie, Ethan Butcher, Anoop Chauhan, Samuel Robson

EPI\_ISL\_652111, EPI\_ISL\_652113

Northumbria University / South Tees Hospitals NHS Foundation Trust / North Cumbria Integrated Care NHS Foundation Trust / North Tees and Hartlepool NHS Foundation Trust / Newcastle Hospitals NHS Foundation Trust

COVID-19 Genomics UK (COG-UK) Consortium

Darren L Smith, Andrew Nelson, Matthew Bastion, Gagg R Young, Joshua Loh, John Allan, Mohammad A Tariq, Giles S Holt, Gary Black, Wen C Yew, Lynn Dover, Paul Baker, Steve Uggitt, Sarah Essex, Jane Greenaway, Jodera Padgett, Olive Graham, Garren Scott, Edward Barton, Emma Swindells, Brendan Payne, Jennifer Collins, Yusef Talah, Gary Ellingham

EPI\_ISL\_652118, EPI\_ISL\_652119, EPI\_ISL\_652120, EPI\_ISL\_652125, EPI\_ISL\_652128, EPI\_ISL\_652129

Oxford Virotics, MDM, University of Oxford, Oxford University Hospitals, Basinsgrove and North Hampshire Hospital

COVID-19 Genomics UK (COG-UK) Consortium

Dave J Baker, Gemma L Kay, Alp Aydin, Thanh Le-Viet, Steven Rudder, Ana P, Tedim, Anastasiya Kolyva, Maria Diaz, Leonardo de Oliveira Martins, Nabil-Fareed Alkhran, Lizzie Meadows, Rachael Starley, Nyguzi Elnurojo, Muhammad Yasir, Nicholas M, Thomson, Alexander J Trotter, Rachel Gilroy, Samuel Bloomfield, Claire Stuart, Andrew Bell, Reemesh Prakash, Sami Dervisovic, Alison E, Mahner, John Wain, Mark Webber, Andrew J, Page, Justin OGrady

EPI\_ISL\_652161, EPI\_ISL\_652182, EPI\_ISL\_652165, EPI\_ISL\_652167, EPI\_ISL\_652168, EPI\_ISL\_652175, EPI\_ISL\_652179

Department of Pathology, University of Cambridge

COVID-19 Genomics UK (COG-UK) Consortium

Aminu S. Jahun, Yasmin Chaudhry, Grant Hall, Iliana Georgiana, Myra Hosnilo, Martin D. Curran, Maite Frickert, Suerendra Pamar, Ian Goodfellow

EPI\_ISL\_652190, EPI\_ISL\_652192, EPI\_ISL\_652194, EPI\_ISL\_652195, EPI\_ISL\_652196, EPI\_ISL\_652197, EPI\_ISL\_652198, EPI\_ISL\_652199, EPI\_ISL\_652202, EPI\_ISL\_652204, EPI\_ISL\_652205, EPI\_ISL\_652211, EPI\_ISL\_652214

Queens Medical Centre, Clinical Microbiology Department / DeepSeq Nottingham

COVID-19 Genomics UK (COG-UK) Consortium

Gemma Clark, Wendy Smith, Manjinder Khatn, Vicki M Fleming, Michèle M Lister, Hannah Howson-Wells, Jonathan Ball, Patrick McCuire, Joseph Chappell, Theodorakis Tselordis, Nadine Holmes, Matthew Carlisle, Christopher Moore, Fai Sang, Johnny Debebe, Victoria Wright, Matthew Loose

EPI\_ISL\_652217, EPI\_ISL\_652227, EPI\_ISL\_652231, EPI\_ISL\_652232, EPI\_ISL\_652233, EPI\_ISL\_652237, EPI\_ISL\_652240, EPI\_ISL\_652241, EPI\_ISL\_652251, EPI\_ISL\_652262, EPI\_ISL\_652266, EPI\_ISL\_652268, EPI\_ISL\_652269, EPI\_ISL\_652271, EPI\_ISL\_652274, EPI\_ISL\_652277, see above

Quadram Institute Bioscience

COVID-19 Genomics UK (COG-UK) Consortium

Dave J Baker, Gemma L Kay, Alp Aydin, Thanh Le-Viet, Steven Rudder, Ana P, Tedim, Anastasiya Kolyva, Maria Diaz, Leonardo de Oliveira Martins, Nabil-Fareed Alkhran, Lizzie Meadows, Rachael Starley, Nyguzi Elnurojo, Muhammad Yasir, Nicholas M, Thomson, Alexander J Trotter, Rachel Gilroy, Samuel Bloomfield, Claire Stuart, Andrew Bell, Reemesh Prakash, Sami Dervisovic, Alison E, Mahner, John Wain, Mark Webber, Andrew J, Page, Justin OGrady

EPI\_ISL\_652289, EPI\_ISL\_652291, EPI\_ISL\_652293, EPI\_ISL\_652294, EPI\_ISL\_652297, EPI\_ISL\_652301, EPI\_ISL\_652302, EPI\_ISL\_652310

Department of Pathology, University of Cambridge

COVID-19 Genomics UK (COG-UK) Consortium

Bert Thompson, Aaron Jeffries, Michelle Michelsen, Joama Wearwick-Dugdale, Audrey Fabisos, Robyn Manley, Stephen Mitchell, Jane Masoli

EPI\_ISL\_652342, EPI\_ISL\_652345, EPI\_ISL\_652346, EPI\_ISL\_652347

Northumbria University / South Tees Hospitals NHS Foundation Trust / North Cumbria Integrated Care NHS Foundation Trust / Newcastle Hospitals NHS Foundation Trust

COVID-19 Genomics UK (COG-UK) Consortium

Darren L Smith, Andrew Nelson, Matthew Bastion, Gagg R Young, Joshua Loh, John Allan, Mohammad A Tariq, Giles S Holt, Gary Black, Wen C Yew, Lynn Dover, Paul Baker, Steve Uggitt, Sarah Essex, Jane Greenaway, Jodera Padgett, Olive Graham, Garren Scott, Edward Barton, Emma Swindells, Brendan Payne, Jennifer Collins, Yusef Talah, Gary Ellingham

EPI\_ISL\_652352, EPI\_ISL\_652353, EPI\_ISL\_652356, EPI\_ISL\_652359, EPI\_ISL\_652360, EPI\_ISL\_652362, EPI\_ISL\_652363

Regional Virus Laboratory, Belfast Health and Social Care Trust

COVID-19 Genomics UK (COG-UK) Consortium

Cornell McCaughey, James McKenna, Tanaya Curran, Susan Feevery, Alison Watt, Ciara Cox, Mairead Connor, Zolian Molnar, David Simpson, Derek Fairley

EPI\_ISL\_652366, EPI\_ISL\_652368, EPI\_ISL\_652381, EPI\_ISL\_652391, EPI\_ISL\_652392, EPI\_ISL\_652398, EPI\_ISL\_652401

Queens Medical Centre, Clinical Microbiology Department / DeepSeq Nottingham

COVID-19 Genomics UK (COG-UK) Consortium

Gemma Clark, Wendy Smith, Manjinder Khatn, Vicki M Fleming, Michèle M Lister, Hannah Howson-Wells, Jonathan Ball, Patrick McCuire, Joseph Chappell, Theodorakis Tselordis, Nadine Holmes, Matthew Carlisle, Christopher Moore, Fai Sang, Johnny Debebe, Victoria Wright, Matthew Loose

EPI\_ISL\_652417, EPI\_ISL\_652418, EPI\_ISL\_652426, EPI\_ISL\_652431, EPI\_ISL\_652433, EPI\_ISL\_652437, EPI\_ISL\_652446, EPI\_ISL\_652451, EPI\_ISL\_652462, EPI\_ISL\_652466, EPI\_ISL\_652468, EPI\_ISL\_652481, EPI\_ISL\_652486, EPI\_ISL\_652487, EPI\_ISL\_652499, EPI\_ISL\_652500













































|                                                                                                                                |                                                                                                                                                                                                                     |                                          |                                                                                                                                                                                                                                                                                                                                                                                                                                                                                                                                                                                                                                                                                   |
|--------------------------------------------------------------------------------------------------------------------------------|---------------------------------------------------------------------------------------------------------------------------------------------------------------------------------------------------------------------|------------------------------------------|-----------------------------------------------------------------------------------------------------------------------------------------------------------------------------------------------------------------------------------------------------------------------------------------------------------------------------------------------------------------------------------------------------------------------------------------------------------------------------------------------------------------------------------------------------------------------------------------------------------------------------------------------------------------------------------|
| EPI_ISL_664229, EPI_ISL_664230                                                                                                 | Liverpool Clinical Laboratories                                                                                                                                                                                     | COVID-19 Genomics UK (COG-UK) Consortium | Sam Haldenby, Anita Lucaci, Steve Paterson, Julian Hiscox, Alistair Darby, M Almsaud, A Alvezahi, Muhammad Aruwaili, Stuart D Armstrong, Jones Benjamin, Eleanor G Bentley, Anu Chawla, Jordan J Clark, Angela Cowell, Richard Eccles, Isabel Garcia-Dorival, Matthew Gemmill, Alessando Gerada, PKF Gilmore, Richard Gregory, Ximeng Han, Catherine Hartley, Margaret Hughes, Mifan Iurriza-Gomara, James Johnson, L Liu, Jennifer Manson, Charlotte Nelson, Elaine O'Toole, Cassie Olatelu, Rebekah Penrice-Handel, Lucille Rahnbow, N P Randle, Trevor Ian Robinson, Paul Sharma, Ghada T Shawli, James P Stewart, Neil Swainston, Eacelma Varnos, Joanna Wats, Mark Whitehead |
| EPI_ISL_664235                                                                                                                 | Quadram Institute Bioscience                                                                                                                                                                                        | COVID-19 Genomics UK (COG-UK) Consortium | Dave J Baker, Gemma L Kay, Alp Aydin, Thanh Le-Viet, Steven Rudder, Ana P. Tedin, Anastasiya Kolyva, Maria Diaz, Leonardo de Oliveira Martins, Nabih-Fareed Alkhatn, Lizzie Meadows, Rachael Stanley, Nguzi Elnurogo, Muhammad Yasir, Nicholas M. Thomson, Alexander J Trotter, Rachel Gilroy, Samuel Bloomfield, Claire Stuart, Andrew Bell, Reemesh Prakash, Sami Dervisevic, Alison E. Malher, John Vain, Mark Webber, Andrew J. Page, Justin O'Grady                                                                                                                                                                                                                          |
| EPI_ISL_664238, EPI_ISL_664240, EPI_ISL_664241, EPI_ISL_664242, EPI_ISL_664243, EPI_ISL_664244, EPI_ISL_664245, EPI_ISL_664246 | Northumbria University / South Tees Hospitals NHS Foundation Trust / North Tees and Hartlepool NHS Foundation Trust / Newcastle Hospitals NHS Foundation Trust                                                      | COVID-19 Genomics UK (COG-UK) Consortium | Sam Haldenby, Anita Lucaci, Steve Paterson, Julian Hiscox, Alistair Darby, M Almsaud, A Alvezahi, Muhammad Aruwaili, Stuart D Armstrong, Jones Benjamin, Eleanor G Bentley, Anu Chawla, Jordan J Clark, Angela Cowell, Richard Eccles, Isabel Garcia-Dorival, Matthew Gemmill, Alessando Gerada, PKF Gilmore, Richard Gregory, Ximeng Han, Catherine Hartley, Margaret Hughes, Mifan Iurriza-Gomara, James Johnson, L Liu, Jennifer Manson, Charlotte Nelson, Elaine O'Toole, Cassie Olatelu, Rebekah Penrice-Handel, Lucille Rahnbow, N P Randle, Trevor Ian Robinson, Paul Sharma, Ghada T Shawli, James P Stewart, Neil Swainston, Eacelma Varnos, Joanna Wats, Mark Whitehead |
| EPI_ISL_664278                                                                                                                 | Liverpool Clinical Laboratories                                                                                                                                                                                     | COVID-19 Genomics UK (COG-UK) Consortium | Sam Haldenby, Anita Lucaci, Steve Paterson, Julian Hiscox, Alistair Darby, M Almsaud, A Alvezahi, Muhammad Aruwaili, Stuart D Armstrong, Jones Benjamin, Eleanor G Bentley, Anu Chawla, Jordan J Clark, Angela Cowell, Richard Eccles, Isabel Garcia-Dorival, Matthew Gemmill, Alessando Gerada, PKF Gilmore, Richard Gregory, Ximeng Han, Catherine Hartley, Margaret Hughes, Mifan Iurriza-Gomara, James Johnson, L Liu, Jennifer Manson, Charlotte Nelson, Elaine O'Toole, Cassie Olatelu, Rebekah Penrice-Handel, Lucille Rahnbow, N P Randle, Trevor Ian Robinson, Paul Sharma, Ghada T Shawli, James P Stewart, Neil Swainston, Eacelma Varnos, Joanna Wats, Mark Whitehead |
| EPI_ISL_664285, EPI_ISL_664288                                                                                                 | University of Exeter                                                                                                                                                                                                | COVID-19 Genomics UK (COG-UK) Consortium | Ban Temponon, Aaron Jeffries, Michelle Michelsen, Joanna Warwick-Dugdale, Audrey Fabis, Robyn Manley, Stephen Mitchell, Jane Masoli                                                                                                                                                                                                                                                                                                                                                                                                                                                                                                                                               |
| EPI_ISL_664290                                                                                                                 | Quadram Institute Bioscience                                                                                                                                                                                        | COVID-19 Genomics UK (COG-UK) Consortium | Dave J Baker, Gemma L Kay, Alp Aydin, Thanh Le-Viet, Steven Rudder, Ana P. Tedin, Anastasiya Kolyva, Maria Diaz, Leonardo de Oliveira Martins, Nabih-Fareed Alkhatn, Lizzie Meadows, Rachael Stanley, Nguzi Elnurogo, Muhammad Yasir, Nicholas M. Thomson, Alexander J Trotter, Rachel Gilroy, Samuel Bloomfield, Claire Stuart, Andrew Bell, Reemesh Prakash, Sami Dervisevic, Alison E. Malher, John Vain, Mark Webber, Andrew J. Page, Justin O'Grady                                                                                                                                                                                                                          |
| EPI_ISL_664291                                                                                                                 | Department of Pathology, University of Cambridge                                                                                                                                                                    | COVID-19 Genomics UK (COG-UK) Consortium | Aminu S. Jahun, Yasmin Chaudry, Grant Hall, Iliriana Georgiana, Myra Hosnilo, Martin D. Curran, Maite Prickett, Surendra Parmar, Ian Goodfellow                                                                                                                                                                                                                                                                                                                                                                                                                                                                                                                                   |
| EPI_ISL_664296, EPI_ISL_664297                                                                                                 | University of Exeter                                                                                                                                                                                                | COVID-19 Genomics UK (COG-UK) Consortium | Ban Temponon, Aaron Jeffries, Michelle Michelsen, Joanna Warwick-Dugdale, Audrey Fabis, Robyn Manley, Stephen Mitchell, Jane Masoli                                                                                                                                                                                                                                                                                                                                                                                                                                                                                                                                               |
| EPI_ISL_664299                                                                                                                 | Liverpool Clinical Laboratories                                                                                                                                                                                     | COVID-19 Genomics UK (COG-UK) Consortium | Sam Haldenby, Anita Lucaci, Steve Paterson, Julian Hiscox, Alistair Darby, M Almsaud, A Alvezahi, Muhammad Aruwaili, Stuart D Armstrong, Jones Benjamin, Eleanor G Bentley, Anu Chawla, Jordan J Clark, Angela Cowell, Richard Eccles, Isabel Garcia-Dorival, Matthew Gemmill, Alessando Gerada, PKF Gilmore, Richard Gregory, Ximeng Han, Catherine Hartley, Margaret Hughes, Mifan Iurriza-Gomara, James Johnson, L Liu, Jennifer Manson, Charlotte Nelson, Elaine O'Toole, Cassie Olatelu, Rebekah Penrice-Handel, Lucille Rahnbow, N P Randle, Trevor Ian Robinson, Paul Sharma, Ghada T Shawli, James P Stewart, Neil Swainston, Eacelma Varnos, Joanna Wats, Mark Whitehead |
| EPI_ISL_664300                                                                                                                 | Quadram Institute Bioscience                                                                                                                                                                                        | COVID-19 Genomics UK (COG-UK) Consortium | Dave J Baker, Gemma L Kay, Alp Aydin, Thanh Le-Viet, Steven Rudder, Ana P. Tedin, Anastasiya Kolyva, Maria Diaz, Leonardo de Oliveira Martins, Nabih-Fareed Alkhatn, Lizzie Meadows, Rachael Stanley, Nguzi Elnurogo, Muhammad Yasir, Nicholas M. Thomson, Alexander J Trotter, Rachel Gilroy, Samuel Bloomfield, Claire Stuart, Andrew Bell, Reemesh Prakash, Sami Dervisevic, Alison E. Malher, John Vain, Mark Webber, Andrew J. Page, Justin O'Grady                                                                                                                                                                                                                          |
| EPI_ISL_664301                                                                                                                 | Liverpool Clinical Laboratories                                                                                                                                                                                     | COVID-19 Genomics UK (COG-UK) Consortium | Sam Haldenby, Anita Lucaci, Steve Paterson, Julian Hiscox, Alistair Darby, M Almsaud, A Alvezahi, Muhammad Aruwaili, Stuart D Armstrong, Jones Benjamin, Eleanor G Bentley, Anu Chawla, Jordan J Clark, Angela Cowell, Richard Eccles, Isabel Garcia-Dorival, Matthew Gemmill, Alessando Gerada, PKF Gilmore, Richard Gregory, Ximeng Han, Catherine Hartley, Margaret Hughes, Mifan Iurriza-Gomara, James Johnson, L Liu, Jennifer Manson, Charlotte Nelson, Elaine O'Toole, Cassie Olatelu, Rebekah Penrice-Handel, Lucille Rahnbow, N P Randle, Trevor Ian Robinson, Paul Sharma, Ghada T Shawli, James P Stewart, Neil Swainston, Eacelma Varnos, Joanna Wats, Mark Whitehead |
| EPI_ISL_664303, EPI_ISL_664313, EPI_ISL_664316, EPI_ISL_664324, EPI_ISL_664325                                                 | Department of Pathology, University of Cambridge                                                                                                                                                                    | COVID-19 Genomics UK (COG-UK) Consortium | Aminu S. Jahun, Yasmin Chaudry, Grant Hall, Iliriana Georgiana, Myra Hosnilo, Martin D. Curran, Maite Prickett, Surendra Parmar, Ian Goodfellow                                                                                                                                                                                                                                                                                                                                                                                                                                                                                                                                   |
| EPI_ISL_664329                                                                                                                 | University of Exeter                                                                                                                                                                                                | COVID-19 Genomics UK (COG-UK) Consortium | Ban Temponon, Aaron Jeffries, Michelle Michelsen, Joanna Warwick-Dugdale, Audrey Fabis, Robyn Manley, Stephen Mitchell, Jane Masoli                                                                                                                                                                                                                                                                                                                                                                                                                                                                                                                                               |
| EPI_ISL_664333                                                                                                                 | Liverpool Clinical Laboratories                                                                                                                                                                                     | COVID-19 Genomics UK (COG-UK) Consortium | Sam Haldenby, Anita Lucaci, Steve Paterson, Julian Hiscox, Alistair Darby, M Almsaud, A Alvezahi, Muhammad Aruwaili, Stuart D Armstrong, Jones Benjamin, Eleanor G Bentley, Anu Chawla, Jordan J Clark, Angela Cowell, Richard Eccles, Isabel Garcia-Dorival, Matthew Gemmill, Alessando Gerada, PKF Gilmore, Richard Gregory, Ximeng Han, Catherine Hartley, Margaret Hughes, Mifan Iurriza-Gomara, James Johnson, L Liu, Jennifer Manson, Charlotte Nelson, Elaine O'Toole, Cassie Olatelu, Rebekah Penrice-Handel, Lucille Rahnbow, N P Randle, Trevor Ian Robinson, Paul Sharma, Ghada T Shawli, James P Stewart, Neil Swainston, Eacelma Varnos, Joanna Wats, Mark Whitehead |
| EPI_ISL_664334                                                                                                                 | Quadram Institute Bioscience                                                                                                                                                                                        | COVID-19 Genomics UK (COG-UK) Consortium | Dave J Baker, Gemma L Kay, Alp Aydin, Thanh Le-Viet, Steven Rudder, Ana P. Tedin, Anastasiya Kolyva, Maria Diaz, Leonardo de Oliveira Martins, Nabih-Fareed Alkhatn, Lizzie Meadows, Rachael Stanley, Nguzi Elnurogo, Muhammad Yasir, Nicholas M. Thomson, Alexander J Trotter, Rachel Gilroy, Samuel Bloomfield, Claire Stuart, Andrew Bell, Reemesh Prakash, Sami Dervisevic, Alison E. Malher, John Vain, Mark Webber, Andrew J. Page, Justin O'Grady                                                                                                                                                                                                                          |
| EPI_ISL_664337, EPI_ISL_664339, EPI_ISL_664341, EPI_ISL_664343, EPI_ISL_664348, EPI_ISL_664350                                 | Liverpool Clinical Laboratories                                                                                                                                                                                     | COVID-19 Genomics UK (COG-UK) Consortium | Sam Haldenby, Anita Lucaci, Steve Paterson, Julian Hiscox, Alistair Darby, M Almsaud, A Alvezahi, Muhammad Aruwaili, Stuart D Armstrong, Jones Benjamin, Eleanor G Bentley, Anu Chawla, Jordan J Clark, Angela Cowell, Richard Eccles, Isabel Garcia-Dorival, Matthew Gemmill, Alessando Gerada, PKF Gilmore, Richard Gregory, Ximeng Han, Catherine Hartley, Margaret Hughes, Mifan Iurriza-Gomara, James Johnson, L Liu, Jennifer Manson, Charlotte Nelson, Elaine O'Toole, Cassie Olatelu, Rebekah Penrice-Handel, Lucille Rahnbow, N P Randle, Trevor Ian Robinson, Paul Sharma, Ghada T Shawli, James P Stewart, Neil Swainston, Eacelma Varnos, Joanna Wats, Mark Whitehead |
| EPI_ISL_664351                                                                                                                 | Quadram Institute Bioscience                                                                                                                                                                                        | COVID-19 Genomics UK (COG-UK) Consortium | Dave J Baker, Gemma L Kay, Alp Aydin, Thanh Le-Viet, Steven Rudder, Ana P. Tedin, Anastasiya Kolyva, Maria Diaz, Leonardo de Oliveira Martins, Nabih-Fareed Alkhatn, Lizzie Meadows, Rachael Stanley, Nguzi Elnurogo, Muhammad Yasir, Nicholas M. Thomson, Alexander J Trotter, Rachel Gilroy, Samuel Bloomfield, Claire Stuart, Andrew Bell, Reemesh Prakash, Sami Dervisevic, Alison E. Malher, John Vain, Mark Webber, Andrew J. Page, Justin O'Grady                                                                                                                                                                                                                          |
| EPI_ISL_664356                                                                                                                 | University College London Hospital                                                                                                                                                                                  | COVID-19 Genomics UK (COG-UK) Consortium | Justin Heaney, Matthew Byott, Catherine Houlihan, Dan Frampton, Stuart Kirk, Moira Spyer, and Elini Natsouli                                                                                                                                                                                                                                                                                                                                                                                                                                                                                                                                                                      |
| EPI_ISL_664360                                                                                                                 | Northumbria University / South Tees Hospitals NHS Foundation Trust / North Cumbria Integrated Care NHS Foundation Trust / North Tees and Hartlepool NHS Foundation Trust / Newcastle Hospitals NHS Foundation Trust | COVID-19 Genomics UK (COG-UK) Consortium | Sam Haldenby, Anita Lucaci, Steve Paterson, Julian Hiscox, Alistair Darby, M Almsaud, A Alvezahi, Muhammad Aruwaili, Stuart D Armstrong, Jones Benjamin, Eleanor G Bentley, Anu Chawla, Jordan J Clark, Angela Cowell, Richard Eccles, Isabel Garcia-Dorival, Matthew Gemmill, Alessando Gerada, PKF Gilmore, Richard Gregory, Ximeng Han, Catherine Hartley, Margaret Hughes, Mifan Iurriza-Gomara, James Johnson, L Liu, Jennifer Manson, Charlotte Nelson, Elaine O'Toole, Cassie Olatelu, Rebekah Penrice-Handel, Lucille Rahnbow, N P Randle, Trevor Ian Robinson, Paul Sharma, Ghada T Shawli, James P Stewart, Neil Swainston, Eacelma Varnos, Joanna Wats, Mark Whitehead |
| EPI_ISL_664362, EPI_ISL_664363, EPI_ISL_664364                                                                                 | Liverpool Clinical Laboratories                                                                                                                                                                                     | COVID-19 Genomics UK (COG-UK) Consortium | Sam Haldenby, Anita Lucaci, Steve Paterson, Julian Hiscox, Alistair Darby, M Almsaud, A Alvezahi, Muhammad Aruwaili, Stuart D Armstrong, Jones Benjamin, Eleanor G Bentley, Anu Chawla, Jordan J Clark, Angela Cowell, Richard Eccles, Isabel Garcia-Dorival, Matthew Gemmill, Alessando Gerada, PKF Gilmore, Richard Gregory, Ximeng Han, Catherine Hartley, Margaret Hughes, Mifan Iurriza-Gomara, James Johnson, L Liu, Jennifer Manson, Charlotte Nelson, Elaine O'Toole, Cassie Olatelu, Rebekah Penrice-Handel, Lucille Rahnbow, N P Randle, Trevor Ian Robinson, Paul Sharma, Ghada T Shawli, James P Stewart, Neil Swainston, Eacelma Varnos, Joanna Wats, Mark Whitehead |
| EPI_ISL_664365                                                                                                                 | University of Exeter                                                                                                                                                                                                | COVID-19 Genomics UK (COG-UK) Consortium | Ban Temponon, Aaron Jeffries, Michelle Michelsen, Joanna Warwick-Dugdale, Audrey Fabis, Robyn Manley, Stephen Mitchell, Jane Masoli                                                                                                                                                                                                                                                                                                                                                                                                                                                                                                                                               |
| EPI_ISL_664366                                                                                                                 | Quadram Institute Bioscience                                                                                                                                                                                        | COVID-19 Genomics UK (COG-UK) Consortium | Dave J Baker, Gemma L Kay, Alp Aydin, Thanh Le-Viet, Steven Rudder, Ana P. Tedin, Anastasiya Kolyva, Maria Diaz, Leonardo de Oliveira Martins, Nabih-Fareed Alkhatn, Lizzie Meadows, Rachael Stanley, Nguzi Elnurogo, Muhammad Yasir, Nicholas M. Thomson, Alexander J Trotter, Rachel Gilroy, Samuel Bloomfield, Claire Stuart, Andrew Bell, Reemesh Prakash, Sami Dervisevic, Alison E. Malher, John Vain, Mark Webber, Andrew J. Page, Justin O'Grady                                                                                                                                                                                                                          |

|                                                                                                                                                                                |                                                                                                                                                                                                                                                                       |                                                                                                                                  |                                                                                                                                                                                                                                                                                                                                                                                                                                                                                                                                                                                                                                                                                                                                                                                                                                            |
|--------------------------------------------------------------------------------------------------------------------------------------------------------------------------------|-----------------------------------------------------------------------------------------------------------------------------------------------------------------------------------------------------------------------------------------------------------------------|----------------------------------------------------------------------------------------------------------------------------------|--------------------------------------------------------------------------------------------------------------------------------------------------------------------------------------------------------------------------------------------------------------------------------------------------------------------------------------------------------------------------------------------------------------------------------------------------------------------------------------------------------------------------------------------------------------------------------------------------------------------------------------------------------------------------------------------------------------------------------------------------------------------------------------------------------------------------------------------|
| EPI_ISL_664388                                                                                                                                                                 | Liverpool Clinical Laboratories                                                                                                                                                                                                                                       | COVID-19 Genomics UK (COG-UK) Consortium                                                                                         | Samuel Bloomfield, Claire Stuart, Andrew Bell, Reeshesh Prakash, Sami Dervisevic, Alison E. Mather, John Wain, Mark Webber, Andrew J. Page, Justin O'Grady                                                                                                                                                                                                                                                                                                                                                                                                                                                                                                                                                                                                                                                                                 |
| EPI_ISL_664379                                                                                                                                                                 | Department of Pathology, University of Cambridge<br>Northumbria University / South Tees Hospitals NHS Foundation Trust / Northumbria Integrated Care NHS Foundation Trust / North Tees and Hartlepool NHS Foundation Trust / Newcastle Hospitals NHS Foundation Trust | COVID-19 Genomics UK (COG-UK) Consortium                                                                                         | Sam Haldenby, Anila Lucaci, Steve Paterson, Julian Hiscox, Alistair Darby, M. Almeida, A. Aitezahli, Muhannad Aturuwaili, Stuart D Armstrong, Jones Benjamin, Eleanor G Bentley, Anu Chawla, Jordan J Clark, Angela Gerada, Richard Eccles, Isabel Garcia-Dorival, Matthew Gemmill, Alessando Gerada, PKF Gilmore, Richard Gregory, Ximeng Han, Catherine Hartley, Margaret Hughes, Miran Iturriza-Gomara, James Johnson, L Lu, Jennifer Manson, Charlotte Nelson, Elaine O'Toole, Cassie Olateju, Rebekah Penrice-Handi, Lucille Rahnbox, N P Randle, Trevor Ian Robinson, Parul Sharma, Ghada T Shawil, James P Stewart, Neil Swainston, Ecaterina Varnos, Joanna Wats, Mark Whitehead                                                                                                                                                   |
| EPI_ISL_664378, EPI_ISL_664379, EPI_ISL_664386, EPI_ISL_664387, EPI_ISL_664388, EPI_ISL_664390, EPI_ISL_664391, EPI_ISL_664392, EPI_ISL_664393, EPI_ISL_664394, EPI_ISL_664396 | Department of Pathology, University of Cambridge<br>Northumbria University / South Tees Hospitals NHS Foundation Trust / Northumbria Integrated Care NHS Foundation Trust / North Tees and Hartlepool NHS Foundation Trust / Newcastle Hospitals NHS Foundation Trust | COVID-19 Genomics UK (COG-UK) Consortium                                                                                         | Angela Beckett, Yann Bougries, Garry Scartlett, Sharon Glaysher, Scott Elliott, Kelly Bicknell, Robert Impey, Alison Lloyd, Sarah Wylie, Ehan Butcher, Anoop Chaudhan, Samuel Hobson                                                                                                                                                                                                                                                                                                                                                                                                                                                                                                                                                                                                                                                       |
| EPI_ISL_664397, EPI_ISL_664403, EPI_ISL_664411, EPI_ISL_664412, EPI_ISL_664426                                                                                                 | Department of Pathology, University of Cambridge<br>University of Exeter<br>Virology, Department, Sheffield Teaching Hospitals NHS Foundation Trust/Department of Infection, Immunity and Cardiovascular Disease, The Medical School, University of Sheffield         | COVID-19 Genomics UK (COG-UK) Consortium<br>COVID-19 Genomics UK (COG-UK) Consortium<br>COVID-19 Genomics UK (COG-UK) Consortium | Aminu S. Jatun, Yasmin Chaudhry, Grant Hall, Ilirana Georgiana, Myra Hosnilo, Martin D. Curran, Maitte Prickett, Surendra Parmar, Ian Goodfellow, Ben Tompson, Aaron Jeffries, Michelle Michelsen, Joanna Warwick-Dugdale, Audrey Fabis, Robyn Manley, Stephen Mitchell, Jane Masoli, Trushnan de Silva, Matthew Parker, Nikki Smith, Adri Anygal, Rebecca Brown, Luke Green, Rachel Tucker, Paul Parsons, Danielle Groves, Katie Johnson, Laura Carrierio, Alex Keeley, Dave Partridge, Matthew Wyles, Benjamin Lindsey, Mehmet Yavuz, Mohammad Raza, Cahad Evans                                                                                                                                                                                                                                                                         |
| EPI_ISL_664428, EPI_ISL_664435, EPI_ISL_664436, EPI_ISL_664440, EPI_ISL_664443, EPI_ISL_664445                                                                                 | Department of Pathology, University of Cambridge<br>Liverpool Clinical Laboratories                                                                                                                                                                                   | COVID-19 Genomics UK (COG-UK) Consortium<br>COVID-19 Genomics UK (COG-UK) Consortium                                             | Aminu S. Jatun, Yasmin Chaudhry, Grant Hall, Ilirana Georgiana, Myra Hosnilo, Martin D. Curran, Maitte Prickett, Surendra Parmar, Ian Goodfellow, Sam Haldenby, Anila Lucaci, Steve Paterson, Julian Hiscox, Alistair Darby, M. Almeida, A. Aitezahli, Muhannad Aturuwaili, Stuart D Armstrong, Jones Benjamin, Eleanor G Bentley, Anu Chawla, Jordan J Clark, Angela Gerada, Richard Eccles, Isabel Garcia-Dorival, Matthew Gemmill, Alessando Gerada, PKF Gilmore, Richard Gregory, Ximeng Han, Catherine Hartley, Margaret Hughes, Miran Iturriza-Gomara, James Johnson, L Lu, Jennifer Manson, Charlotte Nelson, Elaine O'Toole, Cassie Olateju, Rebekah Penrice-Handi, Lucille Rahnbox, N P Randle, Trevor Ian Robinson, Parul Sharma, Ghada T Shawil, James P Stewart, Neil Swainston, Ecaterina Varnos, Joanna Wats, Mark Whitehead |
| EPI_ISL_664450, EPI_ISL_664452                                                                                                                                                 | Quadram Institute Bioscience                                                                                                                                                                                                                                          | COVID-19 Genomics UK (COG-UK) Consortium                                                                                         | Dave J Baker, Gemma L Kay, Alp Aydin, Thanh Le-Viet, Steven Rudder, Ana P. Tedim, Anastasia Kolyva, Maria Diaz, Leonardo de Oliveira Martins, Nabil-Fareed Alkhran, Lizzie Meadows, Rachael Stanley, Nguzi Elnungo, Muhannad Yasir, Nicholas M. Thomson, Alexander J Trotter, Rachel Gilroy, Samuel Bloomfield, Claire Stuart, Andrew Bell, Reeshesh Prakash, Sami Dervisevic, Alison E. Mather, John Wain, Mark Webber, Andrew J. Page, Justin O'Grady                                                                                                                                                                                                                                                                                                                                                                                    |
| EPI_ISL_664454, EPI_ISL_664456, EPI_ISL_664461, EPI_ISL_664462, EPI_ISL_664463                                                                                                 | Department of Pathology, University of Cambridge<br>University of Exeter<br>Quadram Institute Bioscience                                                                                                                                                              | COVID-19 Genomics UK (COG-UK) Consortium<br>COVID-19 Genomics UK (COG-UK) Consortium<br>COVID-19 Genomics UK (COG-UK) Consortium | Aminu S. Jatun, Yasmin Chaudhry, Grant Hall, Ilirana Georgiana, Myra Hosnilo, Martin D. Curran, Maitte Prickett, Surendra Parmar, Ian Goodfellow, Ben Tompson, Aaron Jeffries, Michelle Michelsen, Joanna Warwick-Dugdale, Audrey Fabis, Robyn Manley, Stephen Mitchell, Jane Masoli, Dava J Baker, Gemma L Kay, Alp Aydin, Thanh Le-Viet, Steven Rudder, Ana P. Tedim, Anastasia Kolyva, Maria Diaz, Leonardo de Oliveira Martins, Nabil-Fareed Alkhran, Lizzie Meadows, Rachael Stanley, Nguzi Elnungo, Muhannad Yasir, Nicholas M. Thomson, Alexander J Trotter, Rachel Gilroy, Samuel Bloomfield, Claire Stuart, Andrew Bell, Reeshesh Prakash, Sami Dervisevic, Alison E. Mather, John Wain, Mark Webber, Andrew J. Page, Justin O'Grady                                                                                              |
| EPI_ISL_664468                                                                                                                                                                 | Liverpool Clinical Laboratories                                                                                                                                                                                                                                       | COVID-19 Genomics UK (COG-UK) Consortium                                                                                         | Sam Haldenby, Anila Lucaci, Steve Paterson, Julian Hiscox, Alistair Darby, M. Almeida, A. Aitezahli, Muhannad Aturuwaili, Stuart D Armstrong, Jones Benjamin, Eleanor G Bentley, Anu Chawla, Jordan J Clark, Angela Gerada, Richard Eccles, Isabel Garcia-Dorival, Matthew Gemmill, Alessando Gerada, PKF Gilmore, Richard Gregory, Ximeng Han, Catherine Hartley, Margaret Hughes, Miran Iturriza-Gomara, James Johnson, L Lu, Jennifer Manson, Charlotte Nelson, Elaine O'Toole, Cassie Olateju, Rebekah Penrice-Handi, Lucille Rahnbox, N P Randle, Trevor Ian Robinson, Parul Sharma, Ghada T Shawil, James P Stewart, Neil Swainston, Ecaterina Varnos, Joanna Wats, Mark Whitehead                                                                                                                                                   |
| EPI_ISL_664470, EPI_ISL_664479, EPI_ISL_664481                                                                                                                                 | Department of Pathology, University of Cambridge<br>University College London Hospital<br>Liverpool Clinical Laboratories                                                                                                                                             | COVID-19 Genomics UK (COG-UK) Consortium<br>COVID-19 Genomics UK (COG-UK) Consortium<br>COVID-19 Genomics UK (COG-UK) Consortium | Sam Haldenby, Anila Lucaci, Steve Paterson, Julian Hiscox, Alistair Darby, M. Almeida, A. Aitezahli, Muhannad Aturuwaili, Stuart D Armstrong, Jones Benjamin, Eleanor G Bentley, Anu Chawla, Jordan J Clark, Angela Gerada, Richard Eccles, Isabel Garcia-Dorival, Matthew Gemmill, Alessando Gerada, PKF Gilmore, Richard Gregory, Ximeng Han, Catherine Hartley, Margaret Hughes, Miran Iturriza-Gomara, James Johnson, L Lu, Jennifer Manson, Charlotte Nelson, Elaine O'Toole, Cassie Olateju, Rebekah Penrice-Handi, Lucille Rahnbox, N P Randle, Trevor Ian Robinson, Parul Sharma, Ghada T Shawil, James P Stewart, Neil Swainston, Ecaterina Varnos, Joanna Wats, Mark Whitehead                                                                                                                                                   |
| EPI_ISL_664484                                                                                                                                                                 | Quadram Institute Bioscience                                                                                                                                                                                                                                          | COVID-19 Genomics UK (COG-UK) Consortium                                                                                         | Dave J Baker, Gemma L Kay, Alp Aydin, Thanh Le-Viet, Steven Rudder, Ana P. Tedim, Anastasia Kolyva, Maria Diaz, Leonardo de Oliveira Martins, Nabil-Fareed Alkhran, Lizzie Meadows, Rachael Stanley, Nguzi Elnungo, Muhannad Yasir, Nicholas M. Thomson, Alexander J Trotter, Rachel Gilroy, Samuel Bloomfield, Claire Stuart, Andrew Bell, Reeshesh Prakash, Sami Dervisevic, Alison E. Mather, John Wain, Mark Webber, Andrew J. Page, Justin O'Grady                                                                                                                                                                                                                                                                                                                                                                                    |
| EPI_ISL_664487, EPI_ISL_664496                                                                                                                                                 | Liverpool Clinical Laboratories                                                                                                                                                                                                                                       | COVID-19 Genomics UK (COG-UK) Consortium                                                                                         | Danen L Smith, Andrew Nelson, Matthew Bastion, Greg R Young, Joshua Loh, John Alan Mohammad, A Tariq Gilles S Hoi, Gary Black, Wen C Yew, Lynn Dover, Paul Baker, Steve Jiggell, Sarah Essex, Jane Greenaway, Debra Pedgett, Clive Graham, Garren Scott, Edward Barton, Emma Swindells, Brendan Payne, Jennifer Collins, Yusuf Taha, Gary Eltringham                                                                                                                                                                                                                                                                                                                                                                                                                                                                                       |
| EPI_ISL_664502                                                                                                                                                                 | Quadram Institute Bioscience                                                                                                                                                                                                                                          | COVID-19 Genomics UK (COG-UK) Consortium                                                                                         | Dave J Baker, Gemma L Kay, Alp Aydin, Thanh Le-Viet, Steven Rudder, Ana P. Tedim, Anastasia Kolyva, Maria Diaz, Leonardo de Oliveira Martins, Nabil-Fareed Alkhran, Lizzie Meadows, Rachael Stanley, Nguzi Elnungo, Muhannad Yasir, Nicholas M. Thomson, Alexander J Trotter, Rachel Gilroy, Samuel Bloomfield, Claire Stuart, Andrew Bell, Reeshesh Prakash, Sami Dervisevic, Alison E. Mather, John Wain, Mark Webber, Andrew J. Page, Justin O'Grady                                                                                                                                                                                                                                                                                                                                                                                    |
| EPI_ISL_664503                                                                                                                                                                 | Northumbria University / South Tees Hospitals NHS Foundation Trust / Northumbria Integrated Care NHS Foundation Trust / North Tees and Hartlepool NHS Foundation Trust / Newcastle Hospitals NHS Foundation Trust                                                     | COVID-19 Genomics UK (COG-UK) Consortium                                                                                         | Danen L Smith, Andrew Nelson, Matthew Bastion, Greg R Young, Joshua Loh, John Alan Mohammad, A Tariq Gilles S Hoi, Gary Black, Wen C Yew, Lynn Dover, Paul Baker, Steve Jiggell, Sarah Essex, Jane Greenaway, Debra Pedgett, Clive Graham, Garren Scott, Edward Barton, Emma Swindells, Brendan Payne, Jennifer Collins, Yusuf Taha, Gary Eltringham                                                                                                                                                                                                                                                                                                                                                                                                                                                                                       |
| EPI_ISL_664504, EPI_ISL_664506, EPI_ISL_664508                                                                                                                                 | Quadram Institute Bioscience                                                                                                                                                                                                                                          | COVID-19 Genomics UK (COG-UK) Consortium                                                                                         | Dave J Baker, Gemma L Kay, Alp Aydin, Thanh Le-Viet, Steven Rudder, Ana P. Tedim, Anastasia Kolyva, Maria Diaz, Leonardo de Oliveira Martins, Nabil-Fareed Alkhran, Lizzie Meadows, Rachael Stanley, Nguzi Elnungo, Muhannad Yasir, Nicholas M. Thomson, Alexander J Trotter, Rachel Gilroy, Samuel Bloomfield, Claire Stuart, Andrew Bell, Reeshesh Prakash, Sami Dervisevic, Alison E. Mather, John Wain, Mark Webber, Andrew J. Page, Justin O'Grady                                                                                                                                                                                                                                                                                                                                                                                    |
| EPI_ISL_664511, EPI_ISL_664519                                                                                                                                                 | Liverpool Clinical Laboratories                                                                                                                                                                                                                                       | COVID-19 Genomics UK (COG-UK) Consortium                                                                                         | Sam Haldenby, Anila Lucaci, Steve Paterson, Julian Hiscox, Alistair Darby, M. Almeida, A. Aitezahli, Muhannad Aturuwaili, Stuart D Armstrong, Jones Benjamin, Eleanor G Bentley, Anu Chawla, Jordan J Clark, Angela Gerada, Richard Eccles, Isabel Garcia-Dorival, Matthew Gemmill, Alessando Gerada,                                                                                                                                                                                                                                                                                                                                                                                                                                                                                                                                      |





|                                                                                                                                                                                                                                                |                                                                                                                                                                                                                     |                                                                                      |                                                                                                                                                                                                                                                                                                                                                                                                                                                                                                                                                                                                                                                                                    |
|------------------------------------------------------------------------------------------------------------------------------------------------------------------------------------------------------------------------------------------------|---------------------------------------------------------------------------------------------------------------------------------------------------------------------------------------------------------------------|--------------------------------------------------------------------------------------|------------------------------------------------------------------------------------------------------------------------------------------------------------------------------------------------------------------------------------------------------------------------------------------------------------------------------------------------------------------------------------------------------------------------------------------------------------------------------------------------------------------------------------------------------------------------------------------------------------------------------------------------------------------------------------|
| EPI_ISL_664685, EPI_ISL_664688, EPI_ISL_664675                                                                                                                                                                                                 | Department of Pathology, University of Cambridge<br>Liverpool Clinical Laboratories                                                                                                                                 | COVID-19 Genomics UK (COG-UK) Consortium<br>COVID-19 Genomics UK (COG-UK) Consortium | Benjamin, Eleanor G Bentley, Anu Chawla, Jordan J Clark, Angela Cowell, Richard Eccles, Isabel Garcia-Dorival, Matthew Gemmill, Alessandro Gerada, PFR Gilmore, Richard Gregory, Ximeng Han, Catherine Hartley, Margaret Hughes, Miran Iuriz-Gomara, James Johnson, L Liu, Jennifer Manson, Charlotte Nelson, Elaine OT oole, Cassie Olatelu, Rebekah Penrice-Handl, Lucille Ranboux, N P Randle, Trevor Ian Robinson, Paul Sharma, Ghada T Shawil, James P Stewart, Neil Swainston, Ecaterina Vamos, Joanna Wats, Mark Whitehead                                                                                                                                                  |
| EPI_ISL_664679                                                                                                                                                                                                                                 | Liverpool Clinical Laboratories                                                                                                                                                                                     | COVID-19 Genomics UK (COG-UK) Consortium                                             | Aminu S. Jahun, Yasmin Chaudry, Grant Hall, Ilana Georgana, Myra Hosnilo, Martin D. Curran, Malte Prickett, Surendra Parmar, Ian Goodfellow                                                                                                                                                                                                                                                                                                                                                                                                                                                                                                                                        |
| EPI_ISL_664688                                                                                                                                                                                                                                 | Quadram Institute Bioscience                                                                                                                                                                                        | COVID-19 Genomics UK (COG-UK) Consortium                                             | Sam Haldenry, Anita Lucaci, Steve Paterson, Julian Hiscox, Alistair Darby, M Airnsaud, A Alvezahli, Muhammad Aruwaili, Stuart D Armstrong, Jones Benjamin, Eleanor G Bentley, Anu Chawla, Jordan J Clark, Angela Cowell, Richard Eccles, Isabel Garcia-Dorival, Matthew Gemmill, Alessandro Gerada, PFR Gilmore, Richard Gregory, Ximeng Han, Catherine Hartley, Margaret Hughes, Miran Iuriz-Gomara, James Johnson, L Liu, Jennifer Manson, Charlotte Nelson, Elaine OT oole, Cassie Olatelu, Rebekah Penrice-Handl, Lucille Ranboux, N P Randle, Trevor Ian Robinson, Paul Sharma, Ghada T Shawil, James P Stewart, Neil Swainston, Ecaterina Vamos, Joanna Wats, Mark Whitehead |
| EPI_ISL_664690                                                                                                                                                                                                                                 | Centre for Enzyme Innovation, University of Portsmouth / Translational Research Laboratory, Portsmouth Hospitals NHS Trust                                                                                          | COVID-19 Genomics UK (COG-UK) Consortium                                             | Dave J Baker, Gemma L Kay, Abi Aydin, Thanh Le-Viet, Steven Rudder, Ana P. Tedim, Anastasiya Kolyva, Maria Diaz, Leonardo de Oliveira Martins, Nabil-Fareed Alkhan, Lizzie Meadows, Rachael Stanley, Ngqizi Elunrogo, Muhammad Yasir, Nicholas M. Thomson, Alexander J Trotter, Rachel Gilroy, Samuel Bloomfield, Claire Stuart, Andrew Bell, Reenesh Prakash, Sami Dervisevic, Alison E. Malher, John Wain, Mark Webber, Andrew J Page, Justin O'Grady                                                                                                                                                                                                                            |
| EPI_ISL_664693, EPI_ISL_664695                                                                                                                                                                                                                 | Liverpool Clinical Laboratories                                                                                                                                                                                     | COVID-19 Genomics UK (COG-UK) Consortium                                             | Angela Beckett, Yann Bourgeois, Garry Scarlett, Sharon Glaysher, Scott Elliot, Kelly Becknell, Robert Impey, Alyson Lloyd, Sarah Wylie, Ethan Butcher, Anoop Chauhan, Samuel Robson                                                                                                                                                                                                                                                                                                                                                                                                                                                                                                |
| EPI_ISL_664693, EPI_ISL_664695                                                                                                                                                                                                                 | Liverpool Clinical Laboratories                                                                                                                                                                                     | COVID-19 Genomics UK (COG-UK) Consortium                                             | Sam Haldenry, Anita Lucaci, Steve Paterson, Julian Hiscox, Alistair Darby, M Airnsaud, A Alvezahli, Muhammad Aruwaili, Stuart D Armstrong, Jones Benjamin, Eleanor G Bentley, Anu Chawla, Jordan J Clark, Angela Cowell, Richard Eccles, Isabel Garcia-Dorival, Matthew Gemmill, Alessandro Gerada, PFR Gilmore, Richard Gregory, Ximeng Han, Catherine Hartley, Margaret Hughes, Miran Iuriz-Gomara, James Johnson, L Liu, Jennifer Manson, Charlotte Nelson, Elaine OT oole, Cassie Olatelu, Rebekah Penrice-Handl, Lucille Ranboux, N P Randle, Trevor Ian Robinson, Paul Sharma, Ghada T Shawil, James P Stewart, Neil Swainston, Ecaterina Vamos, Joanna Wats, Mark Whitehead |
| EPI_ISL_664706                                                                                                                                                                                                                                 | Quadram Institute Bioscience                                                                                                                                                                                        | COVID-19 Genomics UK (COG-UK) Consortium                                             | Dave J Baker, Gemma L Kay, Abi Aydin, Thanh Le-Viet, Steven Rudder, Ana P. Tedim, Anastasiya Kolyva, Maria Diaz, Leonardo de Oliveira Martins, Nabil-Fareed Alkhan, Lizzie Meadows, Rachael Stanley, Ngqizi Elunrogo, Muhammad Yasir, Nicholas M. Thomson, Alexander J Trotter, Rachel Gilroy, Samuel Bloomfield, Claire Stuart, Andrew Bell, Reenesh Prakash, Sami Dervisevic, Alison E. Malher, John Wain, Mark Webber, Andrew J Page, Justin O'Grady                                                                                                                                                                                                                            |
| EPI_ISL_664710                                                                                                                                                                                                                                 | Liverpool Clinical Laboratories                                                                                                                                                                                     | COVID-19 Genomics UK (COG-UK) Consortium                                             | Sam Haldenry, Anita Lucaci, Steve Paterson, Julian Hiscox, Alistair Darby, M Airnsaud, A Alvezahli, Muhammad Aruwaili, Stuart D Armstrong, Jones Benjamin, Eleanor G Bentley, Anu Chawla, Jordan J Clark, Angela Cowell, Richard Eccles, Isabel Garcia-Dorival, Matthew Gemmill, Alessandro Gerada, PFR Gilmore, Richard Gregory, Ximeng Han, Catherine Hartley, Margaret Hughes, Miran Iuriz-Gomara, James Johnson, L Liu, Jennifer Manson, Charlotte Nelson, Elaine OT oole, Cassie Olatelu, Rebekah Penrice-Handl, Lucille Ranboux, N P Randle, Trevor Ian Robinson, Paul Sharma, Ghada T Shawil, James P Stewart, Neil Swainston, Ecaterina Vamos, Joanna Wats, Mark Whitehead |
| EPI_ISL_664714                                                                                                                                                                                                                                 | Quadram Institute Bioscience                                                                                                                                                                                        | COVID-19 Genomics UK (COG-UK) Consortium                                             | Dave J Baker, Gemma L Kay, Abi Aydin, Thanh Le-Viet, Steven Rudder, Ana P. Tedim, Anastasiya Kolyva, Maria Diaz, Leonardo de Oliveira Martins, Nabil-Fareed Alkhan, Lizzie Meadows, Rachael Stanley, Ngqizi Elunrogo, Muhammad Yasir, Nicholas M. Thomson, Alexander J Trotter, Rachel Gilroy, Samuel Bloomfield, Claire Stuart, Andrew Bell, Reenesh Prakash, Sami Dervisevic, Alison E. Malher, John Wain, Mark Webber, Andrew J Page, Justin O'Grady                                                                                                                                                                                                                            |
| EPI_ISL_664724                                                                                                                                                                                                                                 | University College London Hospital                                                                                                                                                                                  | COVID-19 Genomics UK (COG-UK) Consortium                                             | Judith Heaney, Matthew Byott, Catherine Houllihan, Dan Frampton, Stuart Kirk, Maria Szyer and Eleni Nestouli                                                                                                                                                                                                                                                                                                                                                                                                                                                                                                                                                                       |
| EPI_ISL_664725                                                                                                                                                                                                                                 | Quadram Institute Bioscience                                                                                                                                                                                        | COVID-19 Genomics UK (COG-UK) Consortium                                             | Dave J Baker, Gemma L Kay, Abi Aydin, Thanh Le-Viet, Steven Rudder, Ana P. Tedim, Anastasiya Kolyva, Maria Diaz, Leonardo de Oliveira Martins, Nabil-Fareed Alkhan, Lizzie Meadows, Rachael Stanley, Ngqizi Elunrogo, Muhammad Yasir, Nicholas M. Thomson, Alexander J Trotter, Rachel Gilroy, Samuel Bloomfield, Claire Stuart, Andrew Bell, Reenesh Prakash, Sami Dervisevic, Alison E. Malher, John Wain, Mark Webber, Andrew J Page, Justin O'Grady                                                                                                                                                                                                                            |
| EPI_ISL_664727, EPI_ISL_664730, EPI_ISL_664733                                                                                                                                                                                                 | Liverpool Clinical Laboratories                                                                                                                                                                                     | COVID-19 Genomics UK (COG-UK) Consortium                                             | Sam Haldenry, Anita Lucaci, Steve Paterson, Julian Hiscox, Alistair Darby, M Airnsaud, A Alvezahli, Muhammad Aruwaili, Stuart D Armstrong, Jones Benjamin, Eleanor G Bentley, Anu Chawla, Jordan J Clark, Angela Cowell, Richard Eccles, Isabel Garcia-Dorival, Matthew Gemmill, Alessandro Gerada, PFR Gilmore, Richard Gregory, Ximeng Han, Catherine Hartley, Margaret Hughes, Miran Iuriz-Gomara, James Johnson, L Liu, Jennifer Manson, Charlotte Nelson, Elaine OT oole, Cassie Olatelu, Rebekah Penrice-Handl, Lucille Ranboux, N P Randle, Trevor Ian Robinson, Paul Sharma, Ghada T Shawil, James P Stewart, Neil Swainston, Ecaterina Vamos, Joanna Wats, Mark Whitehead |
| EPI_ISL_664735                                                                                                                                                                                                                                 | Quadram Institute Bioscience                                                                                                                                                                                        | COVID-19 Genomics UK (COG-UK) Consortium                                             | Dave J Baker, Gemma L Kay, Abi Aydin, Thanh Le-Viet, Steven Rudder, Ana P. Tedim, Anastasiya Kolyva, Maria Diaz, Leonardo de Oliveira Martins, Nabil-Fareed Alkhan, Lizzie Meadows, Rachael Stanley, Ngqizi Elunrogo, Muhammad Yasir, Nicholas M. Thomson, Alexander J Trotter, Rachel Gilroy, Samuel Bloomfield, Claire Stuart, Andrew Bell, Reenesh Prakash, Sami Dervisevic, Alison E. Malher, John Wain, Mark Webber, Andrew J Page, Justin O'Grady                                                                                                                                                                                                                            |
| EPI_ISL_664736                                                                                                                                                                                                                                 | Northumbria University / South Tees Hospitals NHS Foundation Trust / North Cumbria Integrated Care NHS Foundation Trust / North Tees and Hartlepool NHS Foundation Trust / Newcastle Hospitals NHS Foundation Trust | COVID-19 Genomics UK (COG-UK) Consortium                                             | Darren L Smith, Andrew Nelson, Matthew Bastion, Greg R Young, Joshua Loh, John Allan, Mohammad A Tariq, Giles S Holt, Gary Black, Wen C Yew, Lynn Dover, Paul Baker, Steve Liggett, Sarah Essex, Jane Greenaway, Debra Padgett, Olive Graham, Garren Scott, Edward Barton, Emma Swindells, Brendan Payne, Jennifer Collins, Yusef Taha, Gary Eltringham                                                                                                                                                                                                                                                                                                                            |
| EPI_ISL_664739                                                                                                                                                                                                                                 | Department of Pathology, University of Cambridge                                                                                                                                                                    | COVID-19 Genomics UK (COG-UK) Consortium                                             | Aminu S. Jahun, Yasmin Chaudry, Grant Hall, Ilana Georgana, Myra Hosnilo, Martin D. Curran, Malte Prickett, Surendra Parmar, Ian Goodfellow                                                                                                                                                                                                                                                                                                                                                                                                                                                                                                                                        |
| EPI_ISL_664743                                                                                                                                                                                                                                 | Quadram Institute Bioscience                                                                                                                                                                                        | COVID-19 Genomics UK (COG-UK) Consortium                                             | Dave J Baker, Gemma L Kay, Abi Aydin, Thanh Le-Viet, Steven Rudder, Ana P. Tedim, Anastasiya Kolyva, Maria Diaz, Leonardo de Oliveira Martins, Nabil-Fareed Alkhan, Lizzie Meadows, Rachael Stanley, Ngqizi Elunrogo, Muhammad Yasir, Nicholas M. Thomson, Alexander J Trotter, Rachel Gilroy, Samuel Bloomfield, Claire Stuart, Andrew Bell, Reenesh Prakash, Sami Dervisevic, Alison E. Malher, John Wain, Mark Webber, Andrew J Page, Justin O'Grady                                                                                                                                                                                                                            |
| EPI_ISL_664841, EPI_ISL_664842, EPI_ISL_664846, EPI_ISL_664851, EPI_ISL_664853, EPI_ISL_664855                                                                                                                                                 | Centre for Enzyme Innovation, University of Portsmouth / Translational Research Laboratory, Portsmouth Hospitals NHS Trust                                                                                          | COVID-19 Genomics UK (COG-UK) Consortium                                             | Angela Beckett, Yann Bourgeois, Garry Scarlett, Sharon Glaysher, Scott Elliot, Kelly Becknell, Robert Impey, Alyson Lloyd, Sarah Wylie, Ethan Butcher, Anoop Chauhan, Samuel Robson                                                                                                                                                                                                                                                                                                                                                                                                                                                                                                |
| EPI_ISL_664859, EPI_ISL_664860, EPI_ISL_664888, EPI_ISL_664893, EPI_ISL_664892, EPI_ISL_664922, EPI_ISL_664923, EPI_ISL_664925, EPI_ISL_664927, EPI_ISL_664930, EPI_ISL_664931, EPI_ISL_664933, EPI_ISL_664934, EPI_ISL_664938, EPI_ISL_664939 | Quadram Institute Bioscience                                                                                                                                                                                        | COVID-19 Genomics UK (COG-UK) Consortium                                             | Dave J Baker, Gemma L Kay, Abi Aydin, Thanh Le-Viet, Steven Rudder, Ana P. Tedim, Anastasiya Kolyva, Maria Diaz, Leonardo de Oliveira Martins, Nabil-Fareed Alkhan, Lizzie Meadows, Rachael Stanley, Ngqizi Elunrogo, Muhammad Yasir, Nicholas M. Thomson, Alexander J Trotter, Rachel Gilroy, Samuel Bloomfield, Claire Stuart, Andrew Bell, Reenesh Prakash, Sami Dervisevic, Alison E. Malher, John Wain, Mark Webber, Andrew J Page, Justin O'Grady                                                                                                                                                                                                                            |

|                                                                                                                                                                                                                                                                                                                                                                                                                                                |                                                                                                                                                                                                                                                           |                                          |                                                                                                                                                                                                                                                                                                                                                                                                                                                                                                                                                                                                                                                                                      |
|------------------------------------------------------------------------------------------------------------------------------------------------------------------------------------------------------------------------------------------------------------------------------------------------------------------------------------------------------------------------------------------------------------------------------------------------|-----------------------------------------------------------------------------------------------------------------------------------------------------------------------------------------------------------------------------------------------------------|------------------------------------------|--------------------------------------------------------------------------------------------------------------------------------------------------------------------------------------------------------------------------------------------------------------------------------------------------------------------------------------------------------------------------------------------------------------------------------------------------------------------------------------------------------------------------------------------------------------------------------------------------------------------------------------------------------------------------------------|
| EPI_ISL_664942, EPI_ISL_664944, EPI_ISL_664945, EPI_ISL_664946, EPI_ISL_664948, EPI_ISL_664949, EPI_ISL_664950, EPI_ISL_664951, EPI_ISL_664952, EPI_ISL_664953, EPI_ISL_664954, EPI_ISL_664955, EPI_ISL_664956, EPI_ISL_664957, EPI_ISL_664958, EPI_ISL_664959, EPI_ISL_664960, EPI_ISL_664961, EPI_ISL_664962, EPI_ISL_664963, EPI_ISL_664964, EPI_ISL_664966, EPI_ISL_664967, EPI_ISL_664968, EPI_ISL_665004, EPI_ISL_665005, EPI_ISL_665010 | Department of Pathology, University of Cambridge<br>Virology Department, Sheffield Teaching Hospitals NHS Foundation Trust, Department of Infection, Immunity and Cardiovascular Disease, The Medical School, University of Sheffield                     | COVID-19 Genomics UK (COG-UK) Consortium | Aminu S. Jatum, Yasmin Chaudry, Grant Hall, Iliriana Georgiana, Myra Hostnillo, Martin D. Curran, Maile Prickett, Surendra Parmar, Ian Goodfellow, Thushan de Silva, Matthew Parker, Nikki Smith, Adri Angyal, Rebecca Brown, Luke Green, Rachel Tucker, Paul Parsons, Danielle Groves, Katie Johnson, Laura Carrier, Alex Kealey, Dave Partridge, Matthew Wyles, Benjamin Lindsey, Mehmet Yavuz, Mohammad Raza, Catia Evans                                                                                                                                                                                                                                                         |
| see above                                                                                                                                                                                                                                                                                                                                                                                                                                      |                                                                                                                                                                                                                                                           |                                          |                                                                                                                                                                                                                                                                                                                                                                                                                                                                                                                                                                                                                                                                                      |
| EPI_ISL_665024, EPI_ISL_665029, EPI_ISL_665042                                                                                                                                                                                                                                                                                                                                                                                                 |                                                                                                                                                                                                                                                           |                                          |                                                                                                                                                                                                                                                                                                                                                                                                                                                                                                                                                                                                                                                                                      |
| EPI_ISL_665059, EPI_ISL_665062, EPI_ISL_665084, EPI_ISL_665086, EPI_ISL_665095, EPI_ISL_665097, EPI_ISL_665100                                                                                                                                                                                                                                                                                                                                 | University of Exeter                                                                                                                                                                                                                                      | COVID-19 Genomics UK (COG-UK) Consortium | Ben Temperton, Aaron Jettles, Michelle Michelsen, Joanna Warwick-Dugdale, Audrey Fardos, Robyn Manley, Stephen Mitchell, Jane Masoli                                                                                                                                                                                                                                                                                                                                                                                                                                                                                                                                                 |
| EPI_ISL_665113, EPI_ISL_665114, EPI_ISL_665115, EPI_ISL_665116, EPI_ISL_665117, EPI_ISL_665118, EPI_ISL_665119, EPI_ISL_665120, EPI_ISL_665121, EPI_ISL_665122, EPI_ISL_665123, EPI_ISL_665124, EPI_ISL_665125, EPI_ISL_665126, EPI_ISL_665127, EPI_ISL_665129, EPI_ISL_665130, EPI_ISL_665132, EPI_ISL_665134, EPI_ISL_665135, EPI_ISL_665137, EPI_ISL_665138, EPI_ISL_665140, EPI_ISL_665141, EPI_ISL_665142                                 | Liverpool Clinical Laboratories                                                                                                                                                                                                                           | COVID-19 Genomics UK (COG-UK) Consortium | Sam Haldenry, Anita Lucaci, Steve Paterson, Julian Hiscox, Alistair Dardy, M Airnsaud, A Alvezalhi, Muhammad Aruwalli, Stuart D Armstrong, Jones Benjamin, Eleanor G Bentley, Anu Chawla, Jordan J Clark, Angela Cowell, Richard Eccles, Isabel Garcia-Dorival, Matthew Gemmill, Alessandro Gerada, PKF Gilmore, Richard Gregory, Ximeng Han, Catherine Hartley, Margaret Hughes, Miran Ilturza-Gomara, James Johnson, L Liu, Jennifer Manson, Charlotte Nelson, Elaine O'Toole, Cassie Olatelu, Rebekah Penrice-Handel, Lucile Rambow, N P Randle, Trevor Ian Robinson, Paul Sharma, Ghada T Shawli, James P Stewart, Neil Swainston, Ecaterina Varnos, Joanna Wats, Mark Whitehead |
| see above                                                                                                                                                                                                                                                                                                                                                                                                                                      |                                                                                                                                                                                                                                                           |                                          |                                                                                                                                                                                                                                                                                                                                                                                                                                                                                                                                                                                                                                                                                      |
| EPI_ISL_665205, EPI_ISL_665212, EPI_ISL_665214, EPI_ISL_665218, EPI_ISL_665219, EPI_ISL_665224, EPI_ISL_665227, EPI_ISL_665230, EPI_ISL_665238                                                                                                                                                                                                                                                                                                 | University College London Hospital                                                                                                                                                                                                                        | COVID-19 Genomics UK (COG-UK) Consortium | Judith Heaney, Matthew Byott, Catherine Houllihan, Dan Frampton, Stuart Kirk, Maria Szyer and Eleni Nastouli                                                                                                                                                                                                                                                                                                                                                                                                                                                                                                                                                                         |
| EPI_ISL_665282, EPI_ISL_665284                                                                                                                                                                                                                                                                                                                                                                                                                 | Northumbria University / South Tees Hospitals NHS Foundation Trust / North Cumbria Integrated Care NHS Foundation Trust / Newcastle Hospitals NHS Foundation Trust                                                                                        | COVID-19 Genomics UK (COG-UK) Consortium | Darren L Smith, Andrew Nelson, Matthew Bastion, Greg R Young, Joshua Loh, John Allen, Mohammad A Tariq, Giles S Holt, Gary Black, Wen C Yew, Lynn Dover, Paul Baker, Steve Liggett, Sarah Essex, Jane Greenaway, Debra Padgett, Olive Graham, Garren Scott, Edward Barton, Emma Swindells, Brendan Payne, Jennifer Collins, Yvusi Taha, Gary Eltringham                                                                                                                                                                                                                                                                                                                              |
| EPI_ISL_665289, EPI_ISL_665293                                                                                                                                                                                                                                                                                                                                                                                                                 | University of Exeter<br>Wales Specialist Virology Centre Sequencing lab: Pathogen Genomics Unit                                                                                                                                                           | COVID-19 Genomics UK (COG-UK) Consortium | Sergi Castellano, Rachel Williams, Mark Kristiansen, Paola Resende Silva, Surando Roy, Troy Brooks, Helena Tullil, Paola Niola, Patricia Dyal, Charlotte Williams, Leysa Forrest, Yasmin Parochbaya, Jacqueline Frindley, Samuel Weeks, Julianna Brown, Kathryn Harris, Paul Randell, James Price, Alison Holmes, Judith Brewer                                                                                                                                                                                                                                                                                                                                                      |
| EPI_ISL_665301, EPI_ISL_665304                                                                                                                                                                                                                                                                                                                                                                                                                 | Centre for Enzyme Innovation, University of Portsmouth / Translational Research Laboratory, Portsmouth Hospitals NHS Trust                                                                                                                                | COVID-19 Genomics UK (COG-UK) Consortium | Angela Beckett, Yann Bourgeois, Garry Scarlett, Sharon Glaysher, Scott Elliott, Kelly Bicknell, Robert Impy, Alyson Lloyd, Sarah Wylie, Ethan Butcher, Anoop Chaulhan, Samuel Hobson                                                                                                                                                                                                                                                                                                                                                                                                                                                                                                 |
| EPI_ISL_665307, EPI_ISL_665310, EPI_ISL_665311, EPI_ISL_665314                                                                                                                                                                                                                                                                                                                                                                                 | Northumbria University / South Tees Hospitals NHS Foundation Trust / North Cumbria Integrated Care NHS Foundation Trust / North Tees and Hartlepool NHS Foundation Trust / Newcastle Hospitals NHS Foundation Trust                                       | COVID-19 Genomics UK (COG-UK) Consortium | Darren L Smith, Andrew Nelson, Matthew Bastion, Greg R Young, Joshua Loh, John Allen, Mohammad A Tariq, Giles S Holt, Gary Black, Wen C Yew, Lynn Dover, Paul Baker, Steve Liggett, Sarah Essex, Jane Greenaway, Debra Padgett, Olive Graham, Garren Scott, Edward Barton, Emma Swindells, Brendan Payne, Jennifer Collins, Yvusi Taha, Gary Eltringham                                                                                                                                                                                                                                                                                                                              |
| EPI_ISL_665315                                                                                                                                                                                                                                                                                                                                                                                                                                 | Wales Specialist Virology Centre Sequencing lab: Pathogen Genomics Unit                                                                                                                                                                                   | COVID-19 Genomics UK (COG-UK) Consortium | Catherine Moore, Jonathan Evans, Laura Gifford, Malorie Parry, Simon Cottrell, Angela Marchbank, Alec Burchley, Alexander Adams, Amy Gaslin, Bre Gattica-Wilcox, Jason Coombes, Joel Southgate, Lauren Gilbert, Lee Graham, Nicole Paschiani, Sara Kunzrabe-Summerhayes, Sarah Taylor, Sophie Jones, Sara Ray, Matthew Bull, Joanne Watkins, Sally Cordeir, Tom Connor                                                                                                                                                                                                                                                                                                               |
| EPI_ISL_665318                                                                                                                                                                                                                                                                                                                                                                                                                                 | Northumbria University / South Tees Hospitals NHS Foundation Trust / North Cumbria Integrated Care NHS Foundation Trust / North Tees and Hartlepool NHS Foundation Trust / Newcastle Hospitals NHS Foundation Trust                                       | COVID-19 Genomics UK (COG-UK) Consortium | Darren L Smith, Andrew Nelson, Matthew Bastion, Greg R Young, Joshua Loh, John Allen, Mohammad A Tariq, Giles S Holt, Gary Black, Wen C Yew, Lynn Dover, Paul Baker, Steve Liggett, Sarah Essex, Jane Greenaway, Debra Padgett, Olive Graham, Garren Scott, Edward Barton, Emma Swindells, Brendan Payne, Jennifer Collins, Yvusi Taha, Gary Eltringham                                                                                                                                                                                                                                                                                                                              |
| EPI_ISL_665320, EPI_ISL_665322, EPI_ISL_665323                                                                                                                                                                                                                                                                                                                                                                                                 | University College London Hospital<br>Northumbria University / South Tees Hospitals NHS Foundation Trust / North Cumbria Integrated Care NHS Foundation Trust / North Tees and Hartlepool NHS Foundation Trust / Newcastle Hospitals NHS Foundation Trust | COVID-19 Genomics UK (COG-UK) Consortium | Judith Heaney, Matthew Byott, Catherine Houllihan, Dan Frampton, Stuart Kirk, Maria Szyer and Eleni Nastouli                                                                                                                                                                                                                                                                                                                                                                                                                                                                                                                                                                         |
| EPI_ISL_665324, EPI_ISL_665327                                                                                                                                                                                                                                                                                                                                                                                                                 | University of Exeter<br>Liverpool Clinical Laboratories                                                                                                                                                                                                   | COVID-19 Genomics UK (COG-UK) Consortium | Ben Temperton, Aaron Jettles, Michelle Michelsen, Joanna Warwick-Dugdale, Audrey Fardos, Robyn Manley, Stephen Mitchell, Jane Masoli                                                                                                                                                                                                                                                                                                                                                                                                                                                                                                                                                 |
| EPI_ISL_665331, EPI_ISL_665335                                                                                                                                                                                                                                                                                                                                                                                                                 | Wales Specialist Virology Centre Sequencing lab: Pathogen Genomics Unit                                                                                                                                                                                   | COVID-19 Genomics UK (COG-UK) Consortium | Sam Haldenry, Anita Lucaci, Steve Paterson, Julian Hiscox, Alistair Dardy, M Airnsaud, A Alvezalhi, Muhammad Aruwalli, Stuart D Armstrong, Jones Benjamin, Eleanor G Bentley, Anu Chawla, Jordan J Clark, Angela Cowell, Richard Eccles, Isabel Garcia-Dorival, Matthew Gemmill, Alessandro Gerada, PKF Gilmore, Richard Gregory, Ximeng Han, Catherine Hartley, Margaret Hughes, Miran Ilturza-Gomara, James Johnson, L Liu, Jennifer Manson, Charlotte Nelson, Elaine O'Toole, Cassie Olatelu, Rebekah Penrice-Handel, Lucile Rambow, N P Randle, Trevor Ian Robinson, Paul Sharma, Ghada T Shawli, James P Stewart, Neil Swainston, Ecaterina Varnos, Joanna Wats, Mark Whitehead |
| EPI_ISL_665335                                                                                                                                                                                                                                                                                                                                                                                                                                 | University College London, Great Ormond Street Hospital for Children NHS Foundation Trust, Imperial College Healthcare NHS Trust                                                                                                                          | COVID-19 Genomics UK (COG-UK) Consortium | Sergi Castellano, Rachel Williams, Mark Kristiansen, Paola Resende Silva, Surando Roy, Troy Brooks, Helena Tullil, Paola Niola, Patricia Dyal, Charlotte Williams, Leysa Forrest, Yasmin Parochbaya, Jacqueline Frindley, Samuel Weeks, Julianna Brown, Kathryn Harris, Paul Randell, James Price, Alison Holmes, Judith Brewer                                                                                                                                                                                                                                                                                                                                                      |

|                                                                                                                                |                                                                                                                                                                                                                     |                                          |                                                                                                                                                                                                                                                                                                                                                                                                                                                        |
|--------------------------------------------------------------------------------------------------------------------------------|---------------------------------------------------------------------------------------------------------------------------------------------------------------------------------------------------------------------|------------------------------------------|--------------------------------------------------------------------------------------------------------------------------------------------------------------------------------------------------------------------------------------------------------------------------------------------------------------------------------------------------------------------------------------------------------------------------------------------------------|
| EP1_ISL_665322                                                                                                                 | University College London Hospital                                                                                                                                                                                  | COVID-19 Genomics UK (COG-UK) Consortium | Judith Heaney, Matthew Byott, Catherine Houllihan, Dan Frampton, Stuart Kirk, Moira Spyer and Eleni Nestouli                                                                                                                                                                                                                                                                                                                                           |
| EP1_ISL_665359, EP1_ISL_665362                                                                                                 | Quadram Institute Bioscience                                                                                                                                                                                        | COVID-19 Genomics UK (COG-UK) Consortium | Dave J Baker, Gemma L Kay, Alp Aydin, Thanh Le-Viet, Steven Rudder, Ana P Tedin, Anastasia Kolyva, Maria Diaz, Leonardo de Oliveira Martins, Nabih-Fareed Alkhatib, Lizzie Meadows, Rachael Stanley, Nguzi Eturnogo, Muhammad Yasir, Nicholas M, Thomson, Alexander J Trotter, Rachel Gilroy, Samuel Bloomfield, Claire Stuart, Andrew Bell, Reemesh Prakash, Sami Dervisevic, Alison E, Malher, John Wain, Mark Webber, Andrew J Page, Justin O'Grady |
| EP1_ISL_665367                                                                                                                 | Queens Medical Centre, Clinical Microbiology Department / DeepSeq Nofitgram                                                                                                                                         | COVID-19 Genomics UK (COG-UK) Consortium | Gemma Clark, Wendy Smith, Manjinder Khatik, Vicki M Fleming, Michelle M Lister, Hannah Howson-Wells, Jonathan Ball, Patrick McCuire, Joseph Chappell, Theocharis Tsoloidis, Nadine Holmes, Matthew Carlisle, Christopher Moore, Fai Sang, Johnny Debebe, Victoria Wright, Matthew Loose                                                                                                                                                                |
| EP1_ISL_665371                                                                                                                 | Quadram Institute Bioscience                                                                                                                                                                                        | COVID-19 Genomics UK (COG-UK) Consortium | Dave J Baker, Gemma L Kay, Alp Aydin, Thanh Le-Viet, Steven Rudder, Ana P Tedin, Anastasia Kolyva, Maria Diaz, Leonardo de Oliveira Martins, Nabih-Fareed Alkhatib, Lizzie Meadows, Rachael Stanley, Nguzi Eturnogo, Muhammad Yasir, Nicholas M, Thomson, Alexander J Trotter, Rachel Gilroy, Samuel Bloomfield, Claire Stuart, Andrew Bell, Reemesh Prakash, Sami Dervisevic, Alison E, Malher, John Wain, Mark Webber, Andrew J Page, Justin O'Grady |
| EP1_ISL_665385                                                                                                                 | West of Scotland Specialist Virology Centre, NHSGGC / MRC-University of Glasgow Centre for Virus Research                                                                                                           | COVID-19 Genomics UK (COG-UK) Consortium | Ana da Silva Filipe, Natasha Johnson, Kathy Snodice, Daniel Mar, Stephen Carmichael, Alice Broos, Lily Tong, Jenna Nichols, Kyriaki Nomioku, Sarah McDonald, Richard Oton, Joseph Hughes, Steenu Vadipally, David L Robertson, Alasdair Maclean, Roy Gurnson, Sharif Shaaban, Matthew Holden, Rachel Blacow, Guy Molllet, Kathy L, James Shepherd, Antonia Ho, Emma Thomson                                                                            |
| EP1_ISL_665391                                                                                                                 | Centre for Enzyme Innovation, University of Portsmouth / Translational Research Laboratory, Portsmouth Hospitals NHS Trust                                                                                          | COVID-19 Genomics UK (COG-UK) Consortium | Angela Beckett, Yann Bougeois Garry Scarlett, Sharon Glaysher, Scott Elliott, Kelly Beckett, Robert Impey, Alyson Lloyd, Sarah Wylie, Ethan Butcher, Anoop Chaulhan, Samuel Hooson                                                                                                                                                                                                                                                                     |
| EP1_ISL_665392, EP1_ISL_665393, EP1_ISL_665396, EP1_ISL_665399, EP1_ISL_665402, EP1_ISL_665403, EP1_ISL_665407, EP1_ISL_665409 | Northumbria University / South Tees Hospitals NHS Foundation Trust / North Cumbria Integrated Care NHS Foundation Trust / Newcastle Hospitals NHS Foundation Trust                                                  | COVID-19 Genomics UK (COG-UK) Consortium | Darren L Smith, Andrew Nelson, Matthew Bastion, Gegg R Young, Joshua Loh, John Allan, Mohammad A Tariq, Giles S Holt, Gary Black, Wen C Yew, Lynn Dover, Paul Baker, Steve Liggitt, Sarah Essex, Jane Greenaway, Jdebra Padgett, Olive Graham, Garren Scott, Edward Barton, Emma Swindells, Brendan Payne, Jennifer Collins, Yvstl Taha, Gary Ellitgram                                                                                                |
| EP1_ISL_665411                                                                                                                 | Quadram Institute Bioscience                                                                                                                                                                                        | COVID-19 Genomics UK (COG-UK) Consortium | Dave J Baker, Gemma L Kay, Alp Aydin, Thanh Le-Viet, Steven Rudder, Ana P Tedin, Anastasia Kolyva, Maria Diaz, Leonardo de Oliveira Martins, Nabih-Fareed Alkhatib, Lizzie Meadows, Rachael Stanley, Nguzi Eturnogo, Muhammad Yasir, Nicholas M, Thomson, Alexander J Trotter, Rachel Gilroy, Samuel Bloomfield, Claire Stuart, Andrew Bell, Reemesh Prakash, Sami Dervisevic, Alison E, Malher, John Wain, Mark Webber, Andrew J Page, Justin O'Grady |
| EP1_ISL_665418                                                                                                                 | Centre for Enzyme Innovation, University of Portsmouth / Translational Research Laboratory, Portsmouth Hospitals NHS Trust                                                                                          | COVID-19 Genomics UK (COG-UK) Consortium | Angela Beckett, Yann Bougeois Garry Scarlett, Sharon Glaysher, Scott Elliott, Kelly Beckett, Robert Impey, Alyson Lloyd, Sarah Wylie, Ethan Butcher, Anoop Chaulhan, Samuel Hooson                                                                                                                                                                                                                                                                     |
| EP1_ISL_665425                                                                                                                 | Queens Medical Centre, Clinical Microbiology Department / DeepSeq Nofitgram                                                                                                                                         | COVID-19 Genomics UK (COG-UK) Consortium | Gemma Clark, Wendy Smith, Manjinder Khatik, Vicki M Fleming, Michelle M Lister, Hannah Howson-Wells, Jonathan Ball, Patrick McCuire, Joseph Chappell, Theocharis Tsoloidis, Nadine Holmes, Matthew Carlisle, Christopher Moore, Fai Sang, Johnny Debebe, Victoria Wright, Matthew Loose                                                                                                                                                                |
| EP1_ISL_665434                                                                                                                 | Centre for Enzyme Innovation, University of Portsmouth / Translational Research Laboratory, Portsmouth Hospitals NHS Trust                                                                                          | COVID-19 Genomics UK (COG-UK) Consortium | Ana da Silva Filipe, Natasha Johnson, Kathy Snodice, Daniel Mar, Stephen Carmichael, Alice Broos, Lily Tong, Jenna Nichols, Kyriaki Nomioku, Sarah McDonald, Richard Oton, Joseph Hughes, Steenu Vadipally, David L Robertson, Alasdair Maclean, Roy Gurnson, Sharif Shaaban, Matthew Holden, Rachel Blacow, Guy Molllet, Kathy L, James Shepherd, Antonia Ho, Emma Thomson                                                                            |
| EP1_ISL_665441                                                                                                                 | Queens Medical Centre, Clinical Microbiology Department / DeepSeq Nofitgram                                                                                                                                         | COVID-19 Genomics UK (COG-UK) Consortium | Angela Beckett, Yann Bougeois Garry Scarlett, Sharon Glaysher, Scott Elliott, Kelly Beckett, Robert Impey, Alyson Lloyd, Sarah Wylie, Ethan Butcher, Anoop Chaulhan, Samuel Hooson                                                                                                                                                                                                                                                                     |
| EP1_ISL_665444, EP1_ISL_665445, EP1_ISL_665446, EP1_ISL_665449                                                                 | Quadram Institute Bioscience                                                                                                                                                                                        | COVID-19 Genomics UK (COG-UK) Consortium | Gemma Clark, Wendy Smith, Manjinder Khatik, Vicki M Fleming, Michelle M Lister, Hannah Howson-Wells, Jonathan Ball, Patrick McCuire, Joseph Chappell, Theocharis Tsoloidis, Nadine Holmes, Matthew Carlisle, Christopher Moore, Fai Sang, Johnny Debebe, Victoria Wright, Matthew Loose                                                                                                                                                                |
| EP1_ISL_665451                                                                                                                 | Wales Specialist Virology Centre Sequencing lab: Pathogen Genomics Unit                                                                                                                                             | COVID-19 Genomics UK (COG-UK) Consortium | Dave J Baker, Gemma L Kay, Alp Aydin, Thanh Le-Viet, Steven Rudder, Ana P Tedin, Anastasia Kolyva, Maria Diaz, Leonardo de Oliveira Martins, Nabih-Fareed Alkhatib, Lizzie Meadows, Rachael Stanley, Nguzi Eturnogo, Muhammad Yasir, Nicholas M, Thomson, Alexander J Trotter, Rachel Gilroy, Samuel Bloomfield, Claire Stuart, Andrew Bell, Reemesh Prakash, Sami Dervisevic, Alison E, Malher, John Wain, Mark Webber, Andrew J Page, Justin O'Grady |
| EP1_ISL_665452                                                                                                                 | Queens Medical Centre, Clinical Microbiology Department / DeepSeq Nofitgram                                                                                                                                         | COVID-19 Genomics UK (COG-UK) Consortium | Gemma Clark, Wendy Smith, Manjinder Khatik, Vicki M Fleming, Michelle M Lister, Hannah Howson-Wells, Jonathan Ball, Patrick McCuire, Joseph Chappell, Theocharis Tsoloidis, Nadine Holmes, Matthew Carlisle, Christopher Moore, Fai Sang, Johnny Debebe, Victoria Wright, Matthew Loose                                                                                                                                                                |
| EP1_ISL_665453, EP1_ISL_665467                                                                                                 | Quadram Institute Bioscience                                                                                                                                                                                        | COVID-19 Genomics UK (COG-UK) Consortium | Dave J Baker, Gemma L Kay, Alp Aydin, Thanh Le-Viet, Steven Rudder, Ana P Tedin, Anastasia Kolyva, Maria Diaz, Leonardo de Oliveira Martins, Nabih-Fareed Alkhatib, Lizzie Meadows, Rachael Stanley, Nguzi Eturnogo, Muhammad Yasir, Nicholas M, Thomson, Alexander J Trotter, Rachel Gilroy, Samuel Bloomfield, Claire Stuart, Andrew Bell, Reemesh Prakash, Sami Dervisevic, Alison E, Malher, John Wain, Mark Webber, Andrew J Page, Justin O'Grady |
| EP1_ISL_665471, EP1_ISL_665472                                                                                                 | Centre for Enzyme Innovation, University of Portsmouth / Translational Research Laboratory, Portsmouth Hospitals NHS Trust                                                                                          | COVID-19 Genomics UK (COG-UK) Consortium | Angela Beckett, Yann Bougeois Garry Scarlett, Sharon Glaysher, Scott Elliott, Kelly Beckett, Robert Impey, Alyson Lloyd, Sarah Wylie, Ethan Butcher, Anoop Chaulhan, Samuel Hooson                                                                                                                                                                                                                                                                     |
| EP1_ISL_665473, EP1_ISL_665474                                                                                                 | Wales Specialist Virology Centre Sequencing lab: Pathogen Genomics Unit                                                                                                                                             | COVID-19 Genomics UK (COG-UK) Consortium | Catherine Moore, Johnathan Evans, Laura Gifford, Malorie Perry, Simon Cottrell, Angela Marchbank, Alec Birchley, Alexander Adams, Amy Gaslin, Bre Gattica-Wilcox, Jason Coombes, Joel Southgate, Lauren Gilbert, Lee Graham, Nicole Paschiani, Sara Kunzrzen-Sumnerhayes, Sarah Taylor, Sophie Jones, Sara Rey, Matthew Bull, Joanne Watkins, Sally Corden, Tom Connor                                                                                 |
| EP1_ISL_665488                                                                                                                 | Centre for Enzyme Innovation, University of Portsmouth / Translational Research Laboratory, Portsmouth Hospitals NHS Trust                                                                                          | COVID-19 Genomics UK (COG-UK) Consortium | Angela Beckett, Yann Bougeois Garry Scarlett, Sharon Glaysher, Scott Elliott, Kelly Beckett, Robert Impey, Alyson Lloyd, Sarah Wylie, Ethan Butcher, Anoop Chaulhan, Samuel Hooson                                                                                                                                                                                                                                                                     |
| EP1_ISL_665489, EP1_ISL_665495, EP1_ISL_665497, EP1_ISL_665498, EP1_ISL_665501, EP1_ISL_665502, EP1_ISL_665503                 | Northumbria University / South Tees Hospitals NHS Foundation Trust / North Cumbria Integrated Care NHS Foundation Trust / North Tees and Hartlepool NHS Foundation Trust / Newcastle Hospitals NHS Foundation Trust | COVID-19 Genomics UK (COG-UK) Consortium | Darren L Smith, Andrew Nelson, Matthew Bastion, Gegg R Young, Joshua Loh, John Allan, Mohammad A Tariq, Giles S Holt, Gary Black, Wen C Yew, Lynn Dover, Paul Baker, Steve Liggitt, Sarah Essex, Jane Greenaway, Jdebra Padgett, Olive Graham, Garren Scott, Edward Barton, Emma Swindells, Brendan Payne, Jennifer Collins, Yvstl Taha, Gary Ellitgram                                                                                                |
| EP1_ISL_665507, EP1_ISL_665508                                                                                                 | Quadram Institute Bioscience                                                                                                                                                                                        | COVID-19 Genomics UK (COG-UK) Consortium | Dave J Baker, Gemma L Kay, Alp Aydin, Thanh Le-Viet, Steven Rudder, Ana P Tedin, Anastasia Kolyva, Maria Diaz, Leonardo de Oliveira Martins, Nabih-Fareed Alkhatib, Lizzie Meadows, Rachael Stanley, Nguzi Eturnogo, Muhammad Yasir, Nicholas M, Thomson, Alexander J Trotter, Rachel Gilroy, Samuel Bloomfield, Claire Stuart, Andrew Bell, Reemesh Prakash, Sami Dervisevic, Alison E, Malher, John Wain, Mark Webber, Andrew J Page, Justin O'Grady |
| EP1_ISL_665510                                                                                                                 | Queens Medical Centre, Clinical Microbiology Department / DeepSeq Nofitgram                                                                                                                                         | COVID-19 Genomics UK (COG-UK) Consortium | Gemma Clark, Wendy Smith, Manjinder Khatik, Vicki M Fleming, Michelle M Lister, Hannah Howson-Wells, Jonathan Ball, Patrick McCuire, Joseph Chappell, Theocharis Tsoloidis, Nadine Holmes, Matthew Carlisle, Christopher Moore, Fai Sang, Johnny Debebe, Victoria Wright, Matthew Loose                                                                                                                                                                |
| EP1_ISL_665511, EP1_ISL_665516                                                                                                 | Wales Specialist Virology Centre Sequencing lab: Pathogen Genomics Unit                                                                                                                                             | COVID-19 Genomics UK (COG-UK) Consortium | Catherine Moore, Johnathan Evans, Laura Gifford, Malorie Perry, Simon Cottrell, Angela Marchbank, Alec Birchley, Alexander Adams, Amy Gaslin, Bre Gattica-Wilcox, Jason Coombes, Joel Southgate, Lauren Gilbert, Lee Graham, Nicole Paschiani, Sara Kunzrzen-Sumnerhayes, Sarah Taylor, Sophie Jones, Sara Rey, Matthew Bull, Joanne Watkins, Sally Corden, Tom Connor                                                                                 |
| EP1_ISL_665522, EP1_ISL_665524, EP1_ISL_665529                                                                                 | West of Scotland Specialist Virology Centre, NHSGGC / MRC-University of Glasgow Centre for Virus Research                                                                                                           | COVID-19 Genomics UK (COG-UK) Consortium | Ana da Silva Filipe, Natasha Johnson, Kathy Snodice, Daniel Mar, Stephen Carmichael, Alice Broos, Lily Tong, Jenna Nichols, Kyriaki Nomioku, Sarah McDonald, Richard Oton, Joseph Hughes, Steenu Vadipally, David L Robertson, Alasdair Maclean, Roy Gurnson, Sharif Shaaban, Matthew Holden,                                                                                                                                                          |

|                                                                                                                |                         |                                                                                                                                                                                                 |                                          |                                                                                                                                                                                                                                                                                                                                                                                                                                                                 |
|----------------------------------------------------------------------------------------------------------------|-------------------------|-------------------------------------------------------------------------------------------------------------------------------------------------------------------------------------------------|------------------------------------------|-----------------------------------------------------------------------------------------------------------------------------------------------------------------------------------------------------------------------------------------------------------------------------------------------------------------------------------------------------------------------------------------------------------------------------------------------------------------|
| EPI_ISL_665548, EPI_ISL_665549                                                                                 | University of Exeter    | Queens Medical Centre, Clinical Microbiology Department / DeepSeq Nottingham                                                                                                                    | COVID-19 Genomics UK (COG-UK) Consortium | Bent Temperton, Aaron Jeffries, Michelle Nielsen, Joana Warwick-Dugdale, Audrey Fardos, Robyn Manley, Stephen Mitchell, Jane Masoli                                                                                                                                                                                                                                                                                                                             |
| EPI_ISL_665551                                                                                                 | University of Exeter    | Queens Medical Centre, Clinical Microbiology Department / DeepSeq Nottingham                                                                                                                    | COVID-19 Genomics UK (COG-UK) Consortium | Gemma Clark, Wendy Smith, Manjinder Khatik, Vicki M Fleming, Michelle M Lister, Hannah Howson-Weils, Jonathan Ball, Patrick McClure, Joseph Chappell, Theodoris Tsolodis, Nadine Holmes, Matthew Carlisle, Christopher Moore, Fai Sang, Johnny Debeke, Victoria Wright, Matthew Loose                                                                                                                                                                           |
| EPI_ISL_665554                                                                                                 | University of Edinburgh | Virology Department, Royal Infirmary of Edinburgh, NHS Lothian / School of Biological Sciences, University of Edinburgh / Institute of Genetics and Molecular Medicine, University of Edinburgh | COVID-19 Genomics UK (COG-UK) Consortium | McHugh M, Dewar R, Rooke S, Gallagher M, Balcaza C, O'Toole A, Scheer E, Hill V, McCrone JT, Colquhoun R, Yu X, Jackson B, Rambaut A, Williams TC, Templeton K                                                                                                                                                                                                                                                                                                  |
| EPI_ISL_665557                                                                                                 | University of Edinburgh | Wales Specialist Virology Centre Sequencing lab: Pathogen Genomics Unit                                                                                                                         | COVID-19 Genomics UK (COG-UK) Consortium | Catherine Moore, Johnathan Evans, Laura Gifford, Malorie Perry, Simon Cottrell, Angela Marchbank, Alec Birchley, Alexander Adams, Amy Gasikin, Bree Gatica-Wilcox, Jason Coombes, Joel Southgate, Lauren Gilbert, Lee Graham, Nicole Pachatzani, Sara Kurnizrene-Summerhayes, Sarah Taylor, Sophie Jones, Sara Ray, Matthew Bull, Joanne Watkins, Sally Corden, Tom Connor                                                                                      |
| EPI_ISL_665559                                                                                                 | University of Edinburgh | University College London Hospital                                                                                                                                                              | COVID-19 Genomics UK (COG-UK) Consortium | Judith Heaney, Mathew Byott, Catherine Houllihan, Dan Frampton, Stuart Kirk, Maira Syper and Eleni Nastouli                                                                                                                                                                                                                                                                                                                                                     |
| EPI_ISL_665560                                                                                                 | University of Edinburgh | Quadrant Institute Bioscience                                                                                                                                                                   | COVID-19 Genomics UK (COG-UK) Consortium | Dave J Baker, Gemma L Kay, Alp Aydin, Thanh Le-Viet, Steven Rudder, Ara P. Tedim, Anastasia Kolyva, Maria Diaz, Leonardo de Oliveira Martins, Nabil-Fareed Alkhatan, Lizzie Meadows, Rachel Stanley, Ngyoz Elnurogo, Muhammad Yasir, Nicholas M. Thomson, Alexander J Trotter, Rachel Gilroy, Samuel Bloomfield, Claire Stuart, Andrew Bell, Heenesh Prakash, Sami Dervisevic, Alison E. Mathier, John Wain, Mark Webber, Andrew J. Page, Justin O'Grady        |
| EPI_ISL_665565, EPI_ISL_665566                                                                                 | University of Edinburgh | West of Scotland Specialist Virology Centre, NHSGGC / MRC-University of Glasgow Centre for Virus Research                                                                                       | COVID-19 Genomics UK (COG-UK) Consortium | Ana da Silva Filipe, Natasha Johnson, Kathy Smollett, Daniel Mair, Stephen Carmichael, Alice Broos, Lily Tong, Jemma Nichols, Kyriaki Nomiokou, Sarah McDonald, Richard Orton, Joseph Hughes, Steenu Vaidikpally, David L Robertson, Alasdair Maclean, Roy Gurnson, Sharif Shaaban, Matthew Holden, Rachel Blacow, Guy Mollett, Kathy L, James Shephard, Antonia Ho, Emma Thomson                                                                               |
| EPI_ISL_665577                                                                                                 | University of Edinburgh | Quadrant Institute Bioscience                                                                                                                                                                   | COVID-19 Genomics UK (COG-UK) Consortium | Dave J Baker, Gemma L Kay, Alp Aydin, Thanh Le-Viet, Steven Rudder, Ara P. Tedim, Anastasia Kolyva, Maria Diaz, Leonardo de Oliveira Martins, Nabil-Fareed Alkhatan, Lizzie Meadows, Rachel Stanley, Ngyoz Elnurogo, Muhammad Yasir, Nicholas M. Thomson, Alexander J Trotter, Rachel Gilroy, Samuel Bloomfield, Claire Stuart, Andrew Bell, Heenesh Prakash, Sami Dervisevic, Alison E. Mathier, John Wain, Mark Webber, Andrew J. Page, Justin O'Grady        |
| EPI_ISL_665579                                                                                                 | University of Edinburgh | West of Scotland Specialist Virology Centre, NHSGGC / MRC-University of Glasgow Centre for Virus Research                                                                                       | COVID-19 Genomics UK (COG-UK) Consortium | Ana da Silva Filipe, Natasha Johnson, Kathy Smollett, Daniel Mair, Stephen Carmichael, Alice Broos, Lily Tong, Jemma Nichols, Kyriaki Nomiokou, Sarah McDonald, Richard Orton, Joseph Hughes, Steenu Vaidikpally, David L Robertson, Alasdair Maclean, Roy Gurnson, Sharif Shaaban, Matthew Holden, Rachel Blacow, Guy Mollett, Kathy L, James Shephard, Antonia Ho, Emma Thomson                                                                               |
| EPI_ISL_665580                                                                                                 | University of Edinburgh | University College London Hospital                                                                                                                                                              | COVID-19 Genomics UK (COG-UK) Consortium | Judith Heaney, Mathew Byott, Catherine Houllihan, Dan Frampton, Stuart Kirk, Maira Syper and Eleni Nastouli                                                                                                                                                                                                                                                                                                                                                     |
| EPI_ISL_665582, EPI_ISL_665585, EPI_ISL_665586, EPI_ISL_665589, EPI_ISL_665595, EPI_ISL_665605, EPI_ISL_665607 | University of Edinburgh | Wales Specialist Virology Centre Sequencing lab: Pathogen Genomics Unit                                                                                                                         | COVID-19 Genomics UK (COG-UK) Consortium | Catherine Moore, Johnathan Evans, Laura Gifford, Malorie Perry, Simon Cottrell, Angela Marchbank, Alec Birchley, Alexander Adams, Amy Gasikin, Bree Gatica-Wilcox, Jason Coombes, Joel Southgate, Lauren Gilbert, Lee Graham, Nicole Pachatzani, Sara Kurnizrene-Summerhayes, Sarah Taylor, Sophie Jones, Sara Ray, Matthew Bull, Joanne Watkins, Sally Corden, Tom Connor                                                                                      |
| EPI_ISL_665609                                                                                                 | University of Edinburgh | West of Scotland Specialist Virology Centre, NHSGGC / MRC-University of Glasgow Centre for Virus Research                                                                                       | COVID-19 Genomics UK (COG-UK) Consortium | Ana da Silva Filipe, Natasha Johnson, Kathy Smollett, Daniel Mair, Stephen Carmichael, Alice Broos, Lily Tong, Jemma Nichols, Kyriaki Nomiokou, Sarah McDonald, Richard Orton, Joseph Hughes, Steenu Vaidikpally, David L Robertson, Alasdair Maclean, Roy Gurnson, Sharif Shaaban, Matthew Holden, Rachel Blacow, Guy Mollett, Kathy L, James Shephard, Antonia Ho, Emma Thomson                                                                               |
| EPI_ISL_665610, EPI_ISL_665612                                                                                 | University of Edinburgh | Queens Medical Centre, Clinical Microbiology Department / DeepSeq Nottingham                                                                                                                    | COVID-19 Genomics UK (COG-UK) Consortium | Gemma Clark, Wendy Smith, Manjinder Khatik, Vicki M Fleming, Michelle M Lister, Hannah Howson-Weils, Jonathan Ball, Patrick McClure, Joseph Chappell, Theodoris Tsolodis, Nadine Holmes, Matthew Carlisle, Christopher Moore, Fai Sang, Johnny Debeke, Victoria Wright, Matthew Loose                                                                                                                                                                           |
| EPI_ISL_665614, EPI_ISL_665615                                                                                 | University of Edinburgh | Centre for Enzyme Innovation, University of Portsmouth / Translational Research Laboratory, Portsmouth Hospitals NHS Trust                                                                      | COVID-19 Genomics UK (COG-UK) Consortium | Angela Beckett, Yann Bourgeois, Garry Scarlett, Sharon Glaysier, Scott Elliott, Kelly Bicknell, Robert Impey, Alysson Loyd, Sarah Wylie, Ethan Butcher, Anoop Chauhan, Samuel Rooson                                                                                                                                                                                                                                                                            |
| EPI_ISL_665618, EPI_ISL_665626, EPI_ISL_665630, EPI_ISL_665631                                                 | University of Edinburgh | Northumbria University / South Tees Hospitals NHS Foundation Trust / North Tees and Hartlepool NHS Foundation Trust / Newcastle Hospitals NHS Foundation Trust                                  | COVID-19 Genomics UK (COG-UK) Consortium | Darren L Smith, Andrew Nelson, Matthew Bastion, Greg R Young, Joshua Loh, John Alan Mohammad A Tariq, Giles S Holt, Gary Black, Wen C Yew, Lynn Dover, Paul Baker, Steve Liggett, Sarah Essex, Jane Greenaway, Debra Padgett, Olive Graham, Garren Scott, Edward Barton, Emma Swindells, Brendan McHugh M, Dewar R, Rooke S, Gallagher M, Balcaza C, O'Toole A, Scheer E, Hill V, McCrone JT, Colquhoun R, Yu X, Jackson B, Rambaut A, Williams TC, Templeton K |
| EPI_ISL_665646                                                                                                 | University of Edinburgh | Northumbria University / South Tees Hospitals NHS Foundation Trust / North Tees and Hartlepool NHS Foundation Trust / Newcastle Hospitals NHS Foundation Trust                                  | COVID-19 Genomics UK (COG-UK) Consortium | Catherine Moore, Johnathan Evans, Laura Gifford, Malorie Perry, Simon Cottrell, Angela Marchbank, Alec Birchley, Alexander Adams, Amy Gasikin, Bree Gatica-Wilcox, Jason Coombes, Joel Southgate, Lauren Gilbert, Lee Graham, Nicole Pachatzani, Sara Kurnizrene-Summerhayes, Sarah Taylor, Sophie Jones, Sara Ray, Matthew Bull, Joanne Watkins, Sally Corden, Tom Connor                                                                                      |
| EPI_ISL_665647                                                                                                 | University of Edinburgh | Wales Specialist Virology Centre Sequencing lab: Pathogen Genomics Unit                                                                                                                         | COVID-19 Genomics UK (COG-UK) Consortium | Angela Beckett, Yann Bourgeois, Garry Scarlett, Sharon Glaysier, Scott Elliott, Kelly Bicknell, Robert Impey, Alysson Loyd, Sarah Wylie, Ethan Butcher, Anoop Chauhan, Samuel Rooson                                                                                                                                                                                                                                                                            |
| EPI_ISL_665652                                                                                                 | University of Edinburgh | Centre for Enzyme Innovation, University of Portsmouth / Translational Research Laboratory, Portsmouth Hospitals NHS Trust                                                                      | COVID-19 Genomics UK (COG-UK) Consortium | Catherine Moore, Johnathan Evans, Laura Gifford, Malorie Perry, Simon Cottrell, Angela Marchbank, Alec Birchley, Alexander Adams, Amy Gasikin, Bree Gatica-Wilcox, Jason Coombes, Joel Southgate, Lauren Gilbert, Lee Graham, Nicole Pachatzani, Sara Kurnizrene-Summerhayes, Sarah Taylor, Sophie Jones, Sara Ray, Matthew Bull, Joanne Watkins, Sally Corden, Tom Connor                                                                                      |
| EPI_ISL_665653, EPI_ISL_665654, EPI_ISL_665655                                                                 | University of Edinburgh | Wales Specialist Virology Centre Sequencing lab: Pathogen Genomics Unit                                                                                                                         | COVID-19 Genomics UK (COG-UK) Consortium | Dave J Baker, Gemma L Kay, Alp Aydin, Thanh Le-Viet, Steven Rudder, Ara P. Tedim, Anastasia Kolyva, Maria Diaz, Leonardo de Oliveira Martins, Nabil-Fareed Alkhatan, Lizzie Meadows, Rachel Stanley, Ngyoz Elnurogo, Muhammad Yasir, Nicholas M. Thomson, Alexander J Trotter, Rachel Gilroy, Samuel Bloomfield, Claire Stuart, Andrew Bell, Heenesh Prakash, Sami Dervisevic, Alison E. Mathier, John Wain, Mark Webber, Andrew J. Page, Justin O'Grady        |
| EPI_ISL_665665, EPI_ISL_665671                                                                                 | University of Edinburgh | Quadrant Institute Bioscience                                                                                                                                                                   | COVID-19 Genomics UK (COG-UK) Consortium | Darren L Smith, Andrew Nelson, Matthew Bastion, Greg R Young, Joshua Loh, John Alan Mohammad A Tariq, Giles S Holt, Gary Black, Wen C Yew, Lynn Dover, Paul Baker, Steve Liggett, Sarah Essex, Jane Greenaway, Debra Padgett, Olive Graham, Garren Scott, Edward Barton, Emma Swindells, Brendan Payne, Jennifer Collins, Yasir Taha, Gary Eltringham                                                                                                           |
| EPI_ISL_665673, EPI_ISL_665676                                                                                 | University of Edinburgh | Northumbria University / South Tees Hospitals NHS Foundation Trust / North Tees and Hartlepool NHS Foundation Trust / Newcastle Hospitals NHS Foundation Trust                                  | COVID-19 Genomics UK (COG-UK) Consortium | Darren L Smith, Andrew Nelson, Matthew Bastion, Greg R Young, Joshua Loh, John Alan Mohammad A Tariq, Giles S Holt, Gary Black, Wen C Yew, Lynn Dover, Paul Baker, Steve Liggett, Sarah Essex, Jane Greenaway, Debra Padgett, Olive Graham, Garren Scott, Edward Barton, Emma Swindells, Brendan Payne, Jennifer Collins, Yasir Taha, Gary Eltringham                                                                                                           |
| EPI_ISL_665677                                                                                                 | University of Edinburgh | Wales Specialist Virology Centre Sequencing lab: Pathogen Genomics Unit                                                                                                                         | COVID-19 Genomics UK (COG-UK) Consortium | Catherine Moore, Johnathan Evans, Laura Gifford, Malorie Perry, Simon Cottrell, Angela Marchbank, Alec Birchley, Alexander Adams, Amy Gasikin, Bree Gatica-Wilcox, Jason Coombes, Joel Southgate, Lauren Gilbert, Lee Graham, Nicole Pachatzani, Sara Kurnizrene-Summerhayes, Sarah Taylor, Sophie Jones, Sara Ray, Matthew Bull, Joanne Watkins, Sally Corden, Tom Connor                                                                                      |
| EPI_ISL_665687                                                                                                 | University of Edinburgh | Northumbria University / South Tees Hospitals NHS Foundation Trust / North Tees and Hartlepool NHS Foundation Trust / Newcastle Hospitals NHS Foundation Trust                                  | COVID-19 Genomics UK (COG-UK) Consortium | Darren L Smith, Andrew Nelson, Matthew Bastion, Greg R Young, Joshua Loh, John Alan Mohammad A Tariq, Giles S Holt, Gary Black, Wen C Yew, Lynn Dover, Paul Baker, Steve Liggett, Sarah Essex, Jane Greenaway, Debra Padgett, Olive Graham, Garren Scott, Edward Barton, Emma Swindells, Brendan Payne, Jennifer Collins, Yasir Taha, Gary Eltringham                                                                                                           |
| EPI_ISL_665689                                                                                                 | University of Edinburgh | Quadrant Institute Bioscience                                                                                                                                                                   | COVID-19 Genomics UK (COG-UK) Consortium | Dave J Baker, Gemma L Kay, Alp Aydin, Thanh Le-Viet, Steven Rudder, Ara P. Tedim, Anastasia Kolyva, Maria Diaz, Leonardo de Oliveira Martins, Nabil-Fareed Alkhatan, Lizzie Meadows, Rachel Stanley, Ngyoz Elnurogo, Muhammad Yasir, Nicholas M. Thomson, Alexander J Trotter, Rachel Gilroy, Samuel Bloomfield, Claire Stuart, Andrew Bell, Heenesh Prakash, Sami Dervisevic, Alison E. Mathier, John Wain, Mark Webber, Andrew J. Page, Justin O'Grady        |

|                                                                                                                                                                                |                                                                                                                                                                                                                     |                                          |                                                                                                                                                                                                                                                                                                                                                                                                                                                                                                                                                                                                                                                              |
|--------------------------------------------------------------------------------------------------------------------------------------------------------------------------------|---------------------------------------------------------------------------------------------------------------------------------------------------------------------------------------------------------------------|------------------------------------------|--------------------------------------------------------------------------------------------------------------------------------------------------------------------------------------------------------------------------------------------------------------------------------------------------------------------------------------------------------------------------------------------------------------------------------------------------------------------------------------------------------------------------------------------------------------------------------------------------------------------------------------------------------------|
| EPI_ISL_665690, EPI_ISL_665691                                                                                                                                                 | Wales Specialist Virology Centre Sequencing lab: Pathogen Genomics Unit                                                                                                                                             | COVID-19 Genomics UK (COG-UK) Consortium | Catherine Moore, Johnathan Evans, Laura Gifford, Malorie Parry, Simon Cottrell, Angela Marchbank, Alec Birchley, Alexander Adams, Amy Gasikin, Brece Gattica-Wilcox, Jason Coombes, Joel Southgate, Lauren Gilbert, Lee Graham, Nicole Pasochiani, Sara Kunzane-Summerhayes, Sarah Taylor, Sophie Jones, Sara Ray, Matthew Bull, Joanna Watkins, Sally Corden, Tom Connor                                                                                                                                                                                                                                                                                    |
| EPI_ISL_665698                                                                                                                                                                 | Centre for Enzyme Innovation, University of Portsmouth / Translational Research Laboratory, Portsmouth Hospitals NHS Trust                                                                                          | COVID-19 Genomics UK (COG-UK) Consortium | Angela Beckett, Yarn Bougeois Garry, Scarlett Sharon Glynshter, Scott Elliot, Kelly Bicknell, Robert Impey, Alyson Lloyd, Sarah Wylie, Ethan Butcher, Anoop Chaulhan, Samuel Hoosen                                                                                                                                                                                                                                                                                                                                                                                                                                                                          |
| EPI_ISL_665704, EPI_ISL_665707                                                                                                                                                 | Liverpool Clinical Laboratories                                                                                                                                                                                     | COVID-19 Genomics UK (COG-UK) Consortium | Sam Haldenry, Anlia Lucaci, Steve Paterson, Julian Higgins, Alistair David, M Almsaud, A Alvezahli, Muhammad Atunwall, Stuart D Armstrong, Jones Benjamin, Eleanor G Bentley, Anu Crawa, Jordan Clark, Richard Eccles, Isabel Garcia-Dorival, Matthew Gammell, Alessandro Gerada, PKR Gilmore, Gregory, Ximeng Han, Catherine Hartley, Margaret Hughes, Mirren Iburiza-Gomara, James Johnson, Li Liu, Jennifer Mansson, Chandice Nelson, Elaine O'Toole, Cassie Olatulu, Rebekah Penrice-Randall, Lucile Rankox, NP Pardiella, Trevor Ian Robinson, Paul Sharma, Ghada T Shawil, James P Stewart, Neil Swainston, Estelma Vamos, Joanna Wats, Mark Whitehead |
| EPI_ISL_665715, EPI_ISL_665716                                                                                                                                                 | University College London, Great Ormond Street Hospital for Children NHS Foundation Trust, Imperial College Healthcare NHS Trust                                                                                    | COVID-19 Genomics UK (COG-UK) Consortium | Seigi Castellano, Rachel Williams, Mark Kristiansen, Paola Resende Silva, Surando Roy, Tony Brooks, Helena Tullii, Paola Niola, Patricia Dyal, Charlotte Williams, Leyla Forrest, Yasmin Panchbaya, Jaqueline Findlay, Samuel Weeks, Julienne Brown, Kathryn Harris, Paul Randell, James Price, Alison Holmes, Judith Breuer                                                                                                                                                                                                                                                                                                                                 |
| EPI_ISL_665717                                                                                                                                                                 | Northumbria University / South Tees Hospitals NHS Foundation Trust / North Cumbria Integrated Care NHS Foundation Trust / North Tees and Hartlepool NHS Foundation Trust / Newcastle Hospitals NHS Foundation Trust | COVID-19 Genomics UK (COG-UK) Consortium | Daren L Smith, Andrew Nelson, Matthew Baston, Gagg R Young, Joshua Loh, John Alan Mohammad, A Tariq, Giles S Holt, Gary Black, Wen C Yew, Lynn Dover, Paul Baker, Steve Liggett, Sarah Essex, Jane Greenaway, Debra Padgett, Clive Graham, Garren Scott, Edward Barton, Emma Swindells, Brendan Payne, Jennifer Collins, Yusuf Taha, Gary Ellingham                                                                                                                                                                                                                                                                                                          |
| EPI_ISL_665719                                                                                                                                                                 | University of Exeter                                                                                                                                                                                                | COVID-19 Genomics UK (COG-UK) Consortium | Ban Temponon, Aaron Jeffries, Michelle Michelsen, Joanna Warwick, Dugdale, Audrey Farnos, Robyn Manley, Stephen Mitchell, Jana Masoli                                                                                                                                                                                                                                                                                                                                                                                                                                                                                                                        |
| EPI_ISL_665723                                                                                                                                                                 | Centre for Enzyme Innovation, University of Portsmouth / Translational Research Laboratory, Portsmouth Hospitals NHS Trust                                                                                          | COVID-19 Genomics UK (COG-UK) Consortium | Angela Beckett, Yarn Bougeois, Garry, Scarlett Sharon Glynshter, Scott Elliot, Kelly Bicknell, Robert Impey, Alyson Lloyd, Sarah Wylie, Ethan Butcher, Anoop Chaulhan, Samuel Hoosen                                                                                                                                                                                                                                                                                                                                                                                                                                                                         |
| EPI_ISL_665725                                                                                                                                                                 | Virology Department, Royal Infirmary of Edinburgh, NHS Lothian / School of Biological Sciences, University of Edinburgh / Institute of Genetics and Molecular Medicine, University of Edinburgh                     | COVID-19 Genomics UK (COG-UK) Consortium | McHugh M, Dewar R, Rooke S, Gallagher M, Balcaza C, O'Toole A, Scher E, Hill V, McCrone JT, Colquhoun R, Yu X, Jackson B, Rambaur A, Williams TC, Templeton K                                                                                                                                                                                                                                                                                                                                                                                                                                                                                                |
| EPI_ISL_665733                                                                                                                                                                 | University College London, Great Ormond Street Hospital for Children NHS Foundation Trust, Imperial College Healthcare NHS Trust                                                                                    | COVID-19 Genomics UK (COG-UK) Consortium | Seigi Castellano, Rachel Williams, Mark Kristiansen, Paola Resende Silva, Surando Roy, Tony Brooks, Helena Tullii, Paola Niola, Patricia Dyal, Charlotte Williams, Leyla Forrest, Yasmin Panchbaya, Jaqueline Findlay, Samuel Weeks, Julienne Brown, Kathryn Harris, Paul Randell, James Price, Alison Holmes, Judith Breuer                                                                                                                                                                                                                                                                                                                                 |
| EPI_ISL_665736, EPI_ISL_665739                                                                                                                                                 | Northumbria University / South Tees Hospitals NHS Foundation Trust / North Cumbria Integrated Care NHS Foundation Trust / North Tees and Hartlepool NHS Foundation Trust / Newcastle Hospitals NHS Foundation Trust | COVID-19 Genomics UK (COG-UK) Consortium | Daren L Smith, Andrew Nelson, Matthew Baston, Gagg R Young, Joshua Loh, John Alan Mohammad, A Tariq, Giles S Holt, Gary Black, Wen C Yew, Lynn Dover, Paul Baker, Steve Liggett, Sarah Essex, Jane Greenaway, Debra Padgett, Clive Graham, Garren Scott, Edward Barton, Emma Swindells, Brendan Payne, Jennifer Collins, Yusuf Taha, Gary Ellingham                                                                                                                                                                                                                                                                                                          |
| EPI_ISL_665741                                                                                                                                                                 | University College London, Great Ormond Street Hospital for Children NHS Foundation Trust, Imperial College Healthcare NHS Trust                                                                                    | COVID-19 Genomics UK (COG-UK) Consortium | Seigi Castellano, Rachel Williams, Mark Kristiansen, Paola Resende Silva, Surando Roy, Tony Brooks, Helena Tullii, Paola Niola, Patricia Dyal, Charlotte Williams, Leyla Forrest, Yasmin Panchbaya, Jaqueline Findlay, Samuel Weeks, Julienne Brown, Kathryn Harris, Paul Randell, James Price, Alison Holmes, Judith Breuer                                                                                                                                                                                                                                                                                                                                 |
| EPI_ISL_665742                                                                                                                                                                 | Northumbria University / South Tees Hospitals NHS Foundation Trust / North Cumbria Integrated Care NHS Foundation Trust / North Tees and Hartlepool NHS Foundation Trust / Newcastle Hospitals NHS Foundation Trust | COVID-19 Genomics UK (COG-UK) Consortium | Daren L Smith, Andrew Nelson, Matthew Baston, Gagg R Young, Joshua Loh, John Alan Mohammad, A Tariq, Giles S Holt, Gary Black, Wen C Yew, Lynn Dover, Paul Baker, Steve Liggett, Sarah Essex, Jane Greenaway, Debra Padgett, Clive Graham, Garren Scott, Edward Barton, Emma Swindells, Brendan Payne, Jennifer Collins, Yusuf Taha, Gary Ellingham                                                                                                                                                                                                                                                                                                          |
| EPI_ISL_665747                                                                                                                                                                 | Quadram Institute Bioscience                                                                                                                                                                                        | COVID-19 Genomics UK (COG-UK) Consortium | Dave J Baker, Gemma L Kay, Alp Aydin, Thanh Le-Viet, Steven Rudder, Ana P. Tedim, Anastasia Kolyva, Maria Diaz, Leonardo de Oliveira Martins, Nadia-Fareed Alihan, Lizze Meadows, Rachael Stanley, Ngozi Elnurogo, Muhammad Yasir, Nicholas M. Thomson, Alexander J Trotter, Rachel Gilroy, Samuel Bloomfield, Claire Stuart, Andrew Bell, Reemesh Prakash, Sami Dervisevic, Alison E. Malher, John Vain, Mark Webber, Andrew J Page, Justin O'Grady                                                                                                                                                                                                         |
| EPI_ISL_665748                                                                                                                                                                 | West of Scotland Specialist Virology Centre, NHSGGC / MRC-University of Glasgow Centre for Virus Research                                                                                                           | COVID-19 Genomics UK (COG-UK) Consortium | Ana da Silva Filipe, Natasha Johnson, Kathy Smollett, Daniel Mar, Stephen Carmichael, Alice Brooks, Lily Tong, Jemma Nichols, Kyriaki Nomiokou, Sarah McDonald, Richard Orton, Joseph Hughes, Steenu Vaidipally, David L Robertson, Alasdair Maclean, Roy Gurnson, Sharif Shaaban, Matthew Holden, Rachel Blacow, Guy Mollett, Kathy L, James Shephard, Antonia Ho, Emma Thomson                                                                                                                                                                                                                                                                             |
| EPI_ISL_665755                                                                                                                                                                 | Wales Specialist Virology Centre Sequencing lab: Pathogen Genomics Unit                                                                                                                                             | COVID-19 Genomics UK (COG-UK) Consortium | Catherine Moore, Johnathan Evans, Laura Gifford, Malorie Parry, Simon Cottrell, Angela Marchbank, Alec Birchley, Alexander Adams, Amy Gasikin, Brece Gattica-Wilcox, Jason Coombes, Joel Southgate, Lauren Gilbert, Lee Graham, Nicole Pasochiani, Sara Kunzane-Summerhayes, Sarah Taylor, Sophie Jones, Sara Ray, Matthew Bull, Joanna Watkins, Sally Corden, Tom Connor                                                                                                                                                                                                                                                                                    |
| EPI_ISL_665792                                                                                                                                                                 | West of Scotland Specialist Virology Centre, NHSGGC / MRC-University of Glasgow Centre for Virus Research                                                                                                           | COVID-19 Genomics UK (COG-UK) Consortium | Ana da Silva Filipe, Natasha Johnson, Kathy Smollett, Daniel Mar, Stephen Carmichael, Alice Brooks, Lily Tong, Jemma Nichols, Kyriaki Nomiokou, Sarah McDonald, Richard Orton, Joseph Hughes, Steenu Vaidipally, David L Robertson, Alasdair Maclean, Roy Gurnson, Sharif Shaaban, Matthew Holden, Rachel Blacow, Guy Mollett, Kathy L, James Shephard, Antonia Ho, Emma Thomson                                                                                                                                                                                                                                                                             |
| EPI_ISL_665797, EPI_ISL_665799, EPI_ISL_665800                                                                                                                                 | Wales Specialist Virology Centre Sequencing lab: Pathogen Genomics Unit                                                                                                                                             | COVID-19 Genomics UK (COG-UK) Consortium | Catherine Moore, Johnathan Evans, Laura Gifford, Malorie Parry, Simon Cottrell, Angela Marchbank, Alec Birchley, Alexander Adams, Amy Gasikin, Brece Gattica-Wilcox, Jason Coombes, Joel Southgate, Lauren Gilbert, Lee Graham, Nicole Pasochiani, Sara Kunzane-Summerhayes, Sarah Taylor, Sophie Jones, Sara Ray, Matthew Bull, Joanna Watkins, Sally Corden, Tom Connor                                                                                                                                                                                                                                                                                    |
| EPI_ISL_665801                                                                                                                                                                 | University College London Hospital                                                                                                                                                                                  | COVID-19 Genomics UK (COG-UK) Consortium | Judith Heaney, Matthew Byott, Catherine Houllihan, Dan Frampton, Stuart Kirk, Maria Splyer and Eleni Nastouli                                                                                                                                                                                                                                                                                                                                                                                                                                                                                                                                                |
| EPI_ISL_665804                                                                                                                                                                 | West of Scotland Specialist Virology Centre, NHSGGC / MRC-University of Glasgow Centre for Virus Research                                                                                                           | COVID-19 Genomics UK (COG-UK) Consortium | Ana da Silva Filipe, Natasha Johnson, Kathy Smollett, Daniel Mar, Stephen Carmichael, Alice Brooks, Lily Tong, Jemma Nichols, Kyriaki Nomiokou, Sarah McDonald, Richard Orton, Joseph Hughes, Steenu Vaidipally, David L Robertson, Alasdair Maclean, Roy Gurnson, Sharif Shaaban, Matthew Holden, Rachel Blacow, Guy Mollett, Kathy L, James Shephard, Antonia Ho, Emma Thomson                                                                                                                                                                                                                                                                             |
| EPI_ISL_665809, EPI_ISL_665810, EPI_ISL_665825, EPI_ISL_665829, EPI_ISL_665831, EPI_ISL_665834, EPI_ISL_665837, EPI_ISL_665842, EPI_ISL_665843, EPI_ISL_665844, EPI_ISL_665845 | University College London Hospital                                                                                                                                                                                  | COVID-19 Genomics UK (COG-UK) Consortium | Judith Heaney, Matthew Byott, Catherine Houllihan, Dan Frampton, Stuart Kirk, Maria Splyer and Eleni Nastouli                                                                                                                                                                                                                                                                                                                                                                                                                                                                                                                                                |
| see above                                                                                                                                                                      | University of Exeter                                                                                                                                                                                                | COVID-19 Genomics UK (COG-UK) Consortium | Ban Temponon, Aaron Jeffries, Michelle Michelsen, Joanna Warwick, Dugdale, Audrey Farnos, Robyn Manley, Stephen Mitchell, Jana Masoli                                                                                                                                                                                                                                                                                                                                                                                                                                                                                                                        |
| EPI_ISL_665861                                                                                                                                                                 | University of Exeter                                                                                                                                                                                                | COVID-19 Genomics UK (COG-UK) Consortium | Thushan de Silva, Matthew Parker, Nikki Smith, Adri Angyal, Rebecca Brown, Luke Green, Rachel Tucker, Paul Parsons, Danielle Groves, Katie Johnson, Laura Carrillo, Alex Keesley, Dave Partridge, Matthew Wyles, Benjamin Lindsey, Mehmet Yavuz, Mohammad Raza, Caitie Evans                                                                                                                                                                                                                                                                                                                                                                                 |
| EPI_ISL_665864                                                                                                                                                                 | Virology Department, Sheffield Teaching Hospitals NHS Foundation Trust, Department of Infection, Immunity and Cardiovascular Disease, The Medical School, University of Sheffield                                   | COVID-19 Genomics UK (COG-UK) Consortium | Dave J Baker, Gemma L Kay, Alp Aydin, Thanh Le-Viet, Steven Rudder, Ana P. Tedim, Anastasia Kolyva, Maria Diaz, Leonardo de Oliveira Martins, Nadia-Fareed Alihan, Lizze Meadows, Rachael Stanley, Ngozi Elnurogo, Muhammad Yasir, Nicholas M. Thomson, Alexander J Trotter, Rachel Gilroy, Samuel Bloomfield, Claire Stuart, Andrew Bell, Reemesh Prakash, Sami Dervisevic, Alison E. Malher, John Vain, Mark Webber, Andrew J Page, Justin O'Grady                                                                                                                                                                                                         |
| EPI_ISL_665879, EPI_ISL_665879, EPI_ISL_665879, EPI_ISL_665886, EPI_ISL_665886, EPI_ISL_665889, EPI_ISL_665890                                                                 | Quadram Institute Bioscience                                                                                                                                                                                        | COVID-19 Genomics UK (COG-UK) Consortium | Angela Beckett, Yarn Bougeois, Garry, Scarlett Sharon Glynshter, Scott Elliot, Kelly Bicknell, Robert Impey, Alyson Lloyd, Sarah Wylie, Ethan Butcher, Anoop Chaulhan, Samuel Hoosen                                                                                                                                                                                                                                                                                                                                                                                                                                                                         |
| EPI_ISL_665908, EPI_ISL_665922, EPI_ISL_665927, EPI_ISL_665934, EPI_ISL_665944                                                                                                 | Queens Medical Centre, Clinical Microbiology Department / DeepSeq Nottingham                                                                                                                                        | COVID-19 Genomics UK (COG-UK) Consortium | Gemma Clark, Wendy Smith, Manjinder Khakh, Vicki M Fleming, Michele M Lister, Hannah Howson-Wells, Jonathan Ball, Patrick McCClure, Joseph Chappell, Theodoris Tselordis, Nadine Holmes, Matthew Carlisle, Christopher Moore, Fai Sang, Johnny Debebe, Victoria Wright, Matthew Joseph                                                                                                                                                                                                                                                                                                                                                                       |
| EPI_ISL_665946, EPI_ISL_665947                                                                                                                                                 | Centre for Enzyme Innovation, University of Portsmouth /                                                                                                                                                            | COVID-19 Genomics UK (COG-UK) Consortium | Angela Beckett, Yarn Bougeois, Garry, Scarlett Sharon Glynshter, Scott Elliot, Kelly Bicknell, Robert Impey, Alyson Lloyd, Sarah Wylie, Ethan Butcher, Anoop                                                                                                                                                                                                                                                                                                                                                                                                                                                                                                 |











|                                                                                                                                                                                                                                                                                                                                                                                                                                                                                                                                                                                                                                                                                                                                                                                                                                                                                                                                                                                                                                                                                                                                                                                                                                                                                                                                                                                                                                                                                                                |                                                                                                           |                                                                                                                                                                                                                                                                                                             |                                                                                                                                                                                                                                                                          |                                                                                                                                                                                                                                                                          |
|----------------------------------------------------------------------------------------------------------------------------------------------------------------------------------------------------------------------------------------------------------------------------------------------------------------------------------------------------------------------------------------------------------------------------------------------------------------------------------------------------------------------------------------------------------------------------------------------------------------------------------------------------------------------------------------------------------------------------------------------------------------------------------------------------------------------------------------------------------------------------------------------------------------------------------------------------------------------------------------------------------------------------------------------------------------------------------------------------------------------------------------------------------------------------------------------------------------------------------------------------------------------------------------------------------------------------------------------------------------------------------------------------------------------------------------------------------------------------------------------------------------|-----------------------------------------------------------------------------------------------------------|-------------------------------------------------------------------------------------------------------------------------------------------------------------------------------------------------------------------------------------------------------------------------------------------------------------|--------------------------------------------------------------------------------------------------------------------------------------------------------------------------------------------------------------------------------------------------------------------------|--------------------------------------------------------------------------------------------------------------------------------------------------------------------------------------------------------------------------------------------------------------------------|
| EP1_ISL_669403                                                                                                                                                                                                                                                                                                                                                                                                                                                                                                                                                                                                                                                                                                                                                                                                                                                                                                                                                                                                                                                                                                                                                                                                                                                                                                                                                                                                                                                                                                 | Biology Unit                                                                                              | First Medical Laboratory                                                                                                                                                                                                                                                                                    | Norwegian Institute of Public Health, Department of Virology                                                                                                                                                                                                             | Kathrine Serne-Johansen, Kamilla Heddeland Insethjord, Hilde Eishaug, Marie Paulsen Madsen, Rasmus Riis Kopperud, Hilde Volian, Karoline Bragstad, Olav Hungnes                                                                                                          |
| EP1_ISL_668442                                                                                                                                                                                                                                                                                                                                                                                                                                                                                                                                                                                                                                                                                                                                                                                                                                                                                                                                                                                                                                                                                                                                                                                                                                                                                                                                                                                                                                                                                                 | Respiratory Virus Unit, Microbiology Services Colindale, Public Health England                            |                                                                                                                                                                                                                                                                                                             | COVID-19 Genomics UK (COG-UK) Consortium                                                                                                                                                                                                                                 | PHE Covid Sequencing Team                                                                                                                                                                                                                                                |
| EP1_ISL_688503, EP1_ISL_688539, EP1_ISL_688614, EP1_ISL_688640, EP1_ISL_688719, EP1_ISL_688721, EP1_ISL_688723, EP1_ISL_688909, EP1_ISL_688928, EP1_ISL_688942, EP1_ISL_688972, EP1_ISL_688992, EP1_ISL_689008, EP1_ISL_689089, EP1_ISL_689129, EP1_ISL_689211, EP1_ISL_689235, EP1_ISL_689236, EP1_ISL_689251, EP1_ISL_689274, EP1_ISL_689297, EP1_ISL_689504, EP1_ISL_689588, EP1_ISL_689596, EP1_ISL_689597, EP1_ISL_689739, EP1_ISL_689749, EP1_ISL_689862, EP1_ISL_689874, EP1_ISL_689894, EP1_ISL_670011, EP1_ISL_670106, EP1_ISL_670211, EP1_ISL_670238, EP1_ISL_670340, EP1_ISL_670441, EP1_ISL_670483, EP1_ISL_670484, EP1_ISL_670783, EP1_ISL_670784, EP1_ISL_670830, EP1_ISL_670839, EP1_ISL_670945, EP1_ISL_671026, EP1_ISL_671071, EP1_ISL_671088, EP1_ISL_671100, EP1_ISL_671109, EP1_ISL_671121, EP1_ISL_671168, EP1_ISL_671169, EP1_ISL_671186, EP1_ISL_671187, EP1_ISL_671213, EP1_ISL_671243                                                                                                                                                                                                                                                                                                                                                                                                                                                                                                                                                                                                 | Department of Virology and Microbiology, Special Diagnostics, Statens Serum Institut, Copenhagen, Denmark | Albersen Lab, Department of Chemistry and Bioscience, Aarhus University, Denmark                                                                                                                                                                                                                            | Danish Covid-19 Genome Consortium                                                                                                                                                                                                                                        |                                                                                                                                                                                                                                                                          |
| EP1_ISL_671270, EP1_ISL_671274, EP1_ISL_671275, EP1_ISL_671276, EP1_ISL_671282, EP1_ISL_671286, EP1_ISL_671289, EP1_ISL_671292, EP1_ISL_671295, EP1_ISL_671296, EP1_ISL_671297, EP1_ISL_671299, EP1_ISL_671301, EP1_ISL_671303, EP1_ISL_671305, EP1_ISL_671306, EP1_ISL_671307, EP1_ISL_671308, EP1_ISL_671309, EP1_ISL_671311, EP1_ISL_671315, EP1_ISL_671316, EP1_ISL_671318, EP1_ISL_671321, EP1_ISL_671323, EP1_ISL_671325, EP1_ISL_671327, EP1_ISL_671331                                                                                                                                                                                                                                                                                                                                                                                                                                                                                                                                                                                                                                                                                                                                                                                                                                                                                                                                                                                                                                                 | Microbiology, Department of Pathology, St. Bernard's Hospital, Gibraltar Health Authority                 | Respiratory Virus Unit, Microbiology Services Colindale, Public Health England                                                                                                                                                                                                                              |                                                                                                                                                                                                                                                                          | PHE Covid Sequencing Team, Dr Nicholas Cortes (Gibraltar), Charlotte Gilbohn-Jones (Gibraltar)                                                                                                                                                                           |
| EP1_ISL_671794, EP1_ISL_671795, EP1_ISL_671796, EP1_ISL_671797, EP1_ISL_671798, EP1_ISL_671799, EP1_ISL_671800, EP1_ISL_671801, EP1_ISL_671802, EP1_ISL_671804                                                                                                                                                                                                                                                                                                                                                                                                                                                                                                                                                                                                                                                                                                                                                                                                                                                                                                                                                                                                                                                                                                                                                                                                                                                                                                                                                 | Hospital Clinico Universitario Lozano Blesa de Zaragoza (España)                                          | SeqCOVID-SPAIN consortium(BV/CSIC)                                                                                                                                                                                                                                                                          |                                                                                                                                                                                                                                                                          | Rafael Benito, Sonia Algarate, Jessica Bueno and SeqCOVID-SPAIN consortium                                                                                                                                                                                               |
| EP1_ISL_671805, EP1_ISL_671806, EP1_ISL_671807, EP1_ISL_671808, EP1_ISL_671810, EP1_ISL_671811, EP1_ISL_671814, EP1_ISL_671816, EP1_ISL_671817, EP1_ISL_671828                                                                                                                                                                                                                                                                                                                                                                                                                                                                                                                                                                                                                                                                                                                                                                                                                                                                                                                                                                                                                                                                                                                                                                                                                                                                                                                                                 | Hospital de la Santa Creu i Sant Pau, Servicio de Microbiología                                           | SeqCOVID-SPAIN consortium(BV/CSIC)                                                                                                                                                                                                                                                                          |                                                                                                                                                                                                                                                                          | Ferran Navarro, Núria Rabella, Elisenda Miró and SeqCOVID-SPAIN consortium                                                                                                                                                                                               |
| EP1_ISL_671834, EP1_ISL_671835, EP1_ISL_671836, EP1_ISL_671837, EP1_ISL_671838, EP1_ISL_671839, EP1_ISL_671840, EP1_ISL_671842, EP1_ISL_671843, EP1_ISL_671846, EP1_ISL_671849, EP1_ISL_671850, EP1_ISL_671851, EP1_ISL_671854, EP1_ISL_671855, EP1_ISL_671856, EP1_ISL_671857, EP1_ISL_671858                                                                                                                                                                                                                                                                                                                                                                                                                                                                                                                                                                                                                                                                                                                                                                                                                                                                                                                                                                                                                                                                                                                                                                                                                 | see above                                                                                                 |                                                                                                                                                                                                                                                                                                             |                                                                                                                                                                                                                                                                          |                                                                                                                                                                                                                                                                          |
| EP1_ISL_671860, EP1_ISL_671861, EP1_ISL_671862                                                                                                                                                                                                                                                                                                                                                                                                                                                                                                                                                                                                                                                                                                                                                                                                                                                                                                                                                                                                                                                                                                                                                                                                                                                                                                                                                                                                                                                                 | see above                                                                                                 | SeqCOVID-SPAIN consortium(BV/CSIC)                                                                                                                                                                                                                                                                          |                                                                                                                                                                                                                                                                          | Elsa Matro, Antoni E. Bordo, Anna Not, Adrián Amouri, Anabel Fernandez, Nona Romani, Veronica Saludes, Cristina Casañ and SeqCOVID-SPAIN consortium                                                                                                                      |
| EP1_ISL_671874, EP1_ISL_671875, EP1_ISL_671883, EP1_ISL_671914, EP1_ISL_671918, EP1_ISL_671926, EP1_ISL_671937                                                                                                                                                                                                                                                                                                                                                                                                                                                                                                                                                                                                                                                                                                                                                                                                                                                                                                                                                                                                                                                                                                                                                                                                                                                                                                                                                                                                 | National Virus Reference Laboratory (IGTP)                                                                | National Virus Reference Laboratory                                                                                                                                                                                                                                                                         |                                                                                                                                                                                                                                                                          | Michael Carr, Gabriel Gonzalez, Jonathan Dean, Daniel Hare, Cillian F De Gascun                                                                                                                                                                                          |
| EP1_ISL_671944                                                                                                                                                                                                                                                                                                                                                                                                                                                                                                                                                                                                                                                                                                                                                                                                                                                                                                                                                                                                                                                                                                                                                                                                                                                                                                                                                                                                                                                                                                 | CHU Purpan - Laboratoire de Virologie - Institut Fédératif de Biologie                                    | CHU Purpan - Laboratoire de Virologie - Institut Fédératif de Biologie                                                                                                                                                                                                                                      |                                                                                                                                                                                                                                                                          | Laour J., Ranger N., Dubois M., Carcerene R., Harter A., Boyer P., Izopet J.                                                                                                                                                                                             |
| EP1_ISL_672752, EP1_ISL_672753, EP1_ISL_672754, EP1_ISL_672756, EP1_ISL_672760, EP1_ISL_672761, EP1_ISL_672764, EP1_ISL_672766, EP1_ISL_672767, EP1_ISL_672768, EP1_ISL_672769, EP1_ISL_672773, EP1_ISL_672774, EP1_ISL_672775, EP1_ISL_672778, EP1_ISL_672781, EP1_ISL_672784, EP1_ISL_672785, EP1_ISL_672786, EP1_ISL_672787, EP1_ISL_672788, EP1_ISL_672789, EP1_ISL_672790, EP1_ISL_672792, EP1_ISL_672793, EP1_ISL_672795, EP1_ISL_672796, EP1_ISL_672798, EP1_ISL_672799, EP1_ISL_672801, EP1_ISL_672802, EP1_ISL_672804, EP1_ISL_672806, EP1_ISL_672808, EP1_ISL_672811, EP1_ISL_672814, EP1_ISL_672816, EP1_ISL_672819, EP1_ISL_672820, EP1_ISL_672825, EP1_ISL_672826, EP1_ISL_672828, EP1_ISL_672829, EP1_ISL_672832, EP1_ISL_672833, EP1_ISL_672834, EP1_ISL_672835, EP1_ISL_672836, EP1_ISL_672837, EP1_ISL_672838, EP1_ISL_672841, EP1_ISL_672842, EP1_ISL_672843, EP1_ISL_672844, EP1_ISL_672845, EP1_ISL_672846, EP1_ISL_672847, EP1_ISL_672848, EP1_ISL_672851, EP1_ISL_672852, EP1_ISL_672853, EP1_ISL_672857, EP1_ISL_672857, EP1_ISL_672858, EP1_ISL_672860, EP1_ISL_672861, EP1_ISL_672862, EP1_ISL_672864, EP1_ISL_672865, EP1_ISL_672867, EP1_ISL_672874, EP1_ISL_672878, EP1_ISL_672881, EP1_ISL_672882, EP1_ISL_672883, EP1_ISL_672884, EP1_ISL_672885, EP1_ISL_672887, EP1_ISL_672887, EP1_ISL_672888, EP1_ISL_672890, EP1_ISL_672894, EP1_ISL_672894, EP1_ISL_672896, EP1_ISL_672897, EP1_ISL_672901, EP1_ISL_672902, EP1_ISL_672904, EP1_ISL_672905, EP1_ISL_672905, EP1_ISL_672911 | see above                                                                                                 | Harper VanSteenthouse, Yumi Kasai, David Gray, Carol Clugston, Anna Dominiczak and Alex Alderton, Roberto Amato, Sonia Goncalves, Ewan Harrison, David K. Jackson, Ian Johnston, Dominic Kwiatkowski, Cordelia Langford, John Sillibe on behalf of the Wellcome Sanger Institute COVID-19 Surveillance Team |                                                                                                                                                                                                                                                                          |                                                                                                                                                                                                                                                                          |
| EP1_ISL_672912, EP1_ISL_672916, EP1_ISL_672918, EP1_ISL_672921, EP1_ISL_672923, EP1_ISL_672924, EP1_ISL_672925, EP1_ISL_672926, EP1_ISL_672928, EP1_ISL_672929, EP1_ISL_672930, EP1_ISL_672931, EP1_ISL_672932, EP1_ISL_672933, EP1_ISL_672934, EP1_ISL_672935, EP1_ISL_672936, EP1_ISL_672937, EP1_ISL_672938, EP1_ISL_672939, EP1_ISL_672940, EP1_ISL_672941, EP1_ISL_672942, EP1_ISL_672943, EP1_ISL_672944, EP1_ISL_672945, EP1_ISL_672946, EP1_ISL_672947, EP1_ISL_672948, EP1_ISL_672949, EP1_ISL_672950, EP1_ISL_672951, EP1_ISL_672952, EP1_ISL_672953, EP1_ISL_672954, EP1_ISL_672955                                                                                                                                                                                                                                                                                                                                                                                                                                                                                                                                                                                                                                                                                                                                                                                                                                                                                                                 | see above                                                                                                 |                                                                                                                                                                                                                                                                                                             | Robb Howes, The LightHouse Lab in Cambridge and Alex Alderton, Roberto Amato, Sonia Goncalves, Ewan Harrison, David K. Jackson, Ian Johnston, Dominic Kwiatkowski, Cordelia Langford, John Sillibe on behalf of the Wellcome Sanger Institute COVID-19 Surveillance Team |                                                                                                                                                                                                                                                                          |
| EP1_ISL_673694, EP1_ISL_673699, EP1_ISL_673700, EP1_ISL_673694, EP1_ISL_673699                                                                                                                                                                                                                                                                                                                                                                                                                                                                                                                                                                                                                                                                                                                                                                                                                                                                                                                                                                                                                                                                                                                                                                                                                                                                                                                                                                                                                                 | Lighthouse Lab in Milton Keynes                                                                           | Wellcome Sanger Institute for the COVID-19 Genomics UK (COG-UK) Consortium                                                                                                                                                                                                                                  |                                                                                                                                                                                                                                                                          | The LightHouse Lab in Milton Keynes and Alex Alderton, Roberto Amato, Sonia Goncalves, Ewan Harrison, David K. Jackson, Ian Johnston, Dominic Kwiatkowski, Cordelia Langford, John Sillibe on behalf of the Wellcome Sanger Institute COVID-19 Surveillance Team         |
| EP1_ISL_673610, EP1_ISL_673611                                                                                                                                                                                                                                                                                                                                                                                                                                                                                                                                                                                                                                                                                                                                                                                                                                                                                                                                                                                                                                                                                                                                                                                                                                                                                                                                                                                                                                                                                 | Lighthouse Lab in Cambridge                                                                               | Wellcome Sanger Institute for the COVID-19 Genomics UK (COG-UK) Consortium                                                                                                                                                                                                                                  |                                                                                                                                                                                                                                                                          | Robb Howes, The LightHouse Lab in Cambridge and Alex Alderton, Roberto Amato, Sonia Goncalves, Ewan Harrison, David K. Jackson, Ian Johnston, Dominic Kwiatkowski, Cordelia Langford, John Sillibe on behalf of the Wellcome Sanger Institute COVID-19 Surveillance Team |
| EP1_ISL_673616                                                                                                                                                                                                                                                                                                                                                                                                                                                                                                                                                                                                                                                                                                                                                                                                                                                                                                                                                                                                                                                                                                                                                                                                                                                                                                                                                                                                                                                                                                 | Lighthouse Lab in Milton Keynes                                                                           | Wellcome Sanger Institute for the COVID-19 Genomics UK (COG-UK) Consortium                                                                                                                                                                                                                                  |                                                                                                                                                                                                                                                                          | The LightHouse Lab in Milton Keynes and Alex Alderton, Roberto Amato, Sonia Goncalves, Ewan Harrison, David K. Jackson, Ian Johnston, Dominic Kwiatkowski, Cordelia Langford, John Sillibe on behalf of the Wellcome Sanger Institute COVID-19 Surveillance Team         |
| EP1_ISL_673619, EP1_ISL_673620, EP1_ISL_673624, EP1_ISL_673626, EP1_ISL_673627, EP1_ISL_673635                                                                                                                                                                                                                                                                                                                                                                                                                                                                                                                                                                                                                                                                                                                                                                                                                                                                                                                                                                                                                                                                                                                                                                                                                                                                                                                                                                                                                 | Lighthouse Lab in Cambridge                                                                               | Wellcome Sanger Institute for the COVID-19 Genomics UK (COG-UK) Consortium                                                                                                                                                                                                                                  |                                                                                                                                                                                                                                                                          | Robb Howes, The LightHouse Lab in Cambridge and Alex Alderton, Roberto Amato, Sonia Goncalves, Ewan Harrison, David K. Jackson, Ian Johnston, Dominic Kwiatkowski, Cordelia Langford, John Sillibe on behalf of the Wellcome Sanger Institute COVID-19 Surveillance Team |
| EP1_ISL_673642                                                                                                                                                                                                                                                                                                                                                                                                                                                                                                                                                                                                                                                                                                                                                                                                                                                                                                                                                                                                                                                                                                                                                                                                                                                                                                                                                                                                                                                                                                 | Lighthouse Lab in Milton Keynes                                                                           | Wellcome Sanger Institute for the COVID-19 Genomics UK (COG-UK) Consortium                                                                                                                                                                                                                                  |                                                                                                                                                                                                                                                                          | The LightHouse Lab in Milton Keynes and Alex Alderton, Roberto Amato, Sonia Goncalves, Ewan Harrison, David K. Jackson, Ian Johnston, Dominic Kwiatkowski, Cordelia Langford, John Sillibe on behalf of the Wellcome Sanger Institute COVID-19 Surveillance Team         |
| EP1_ISL_673644                                                                                                                                                                                                                                                                                                                                                                                                                                                                                                                                                                                                                                                                                                                                                                                                                                                                                                                                                                                                                                                                                                                                                                                                                                                                                                                                                                                                                                                                                                 | Lighthouse Lab in Cambridge                                                                               | Wellcome Sanger Institute for the COVID-19 Genomics UK (COG-UK) Consortium                                                                                                                                                                                                                                  |                                                                                                                                                                                                                                                                          | Robb Howes, The LightHouse Lab in Cambridge and Alex Alderton, Roberto Amato, Sonia Goncalves, Ewan Harrison, David K. Jackson, Ian Johnston, Dominic Kwiatkowski, Cordelia Langford, John Sillibe on behalf of the Wellcome Sanger Institute COVID-19 Surveillance Team |
| EP1_ISL_673646, EP1_ISL_673652, EP1_ISL_673659                                                                                                                                                                                                                                                                                                                                                                                                                                                                                                                                                                                                                                                                                                                                                                                                                                                                                                                                                                                                                                                                                                                                                                                                                                                                                                                                                                                                                                                                 | Lighthouse Lab in Milton Keynes                                                                           | Wellcome Sanger Institute for the COVID-19 Genomics UK (COG-UK) Consortium                                                                                                                                                                                                                                  |                                                                                                                                                                                                                                                                          | The LightHouse Lab in Milton Keynes and Alex Alderton, Roberto Amato, Sonia Goncalves, Ewan Harrison, David K. Jackson, Ian Johnston, Dominic Kwiatkowski, Cordelia Langford, John Sillibe on behalf of the Wellcome Sanger Institute COVID-19 Surveillance Team         |
| EP1_ISL_673667, EP1_ISL_673668, EP1_ISL_673670, EP1_ISL_673675                                                                                                                                                                                                                                                                                                                                                                                                                                                                                                                                                                                                                                                                                                                                                                                                                                                                                                                                                                                                                                                                                                                                                                                                                                                                                                                                                                                                                                                 | Lighthouse Lab in Cambridge                                                                               | Wellcome Sanger Institute for the COVID-19 Genomics UK (COG-UK) Consortium                                                                                                                                                                                                                                  |                                                                                                                                                                                                                                                                          | Robb Howes, The LightHouse Lab in Cambridge and Alex Alderton, Roberto Amato, Sonia Goncalves, Ewan Harrison, David K. Jackson, Ian Johnston, Dominic Kwiatkowski, Cordelia Langford, John Sillibe on behalf of the Wellcome Sanger Institute COVID-19 Surveillance Team |

























|                                                                                                                                                                                                                                                                                                                                                                                                                                                                                                                                                                                                                                                                                                                                                                                                                                                                                                                                                                                                                                                                                                                                                                                                                                                                                                                                                                                                |           |                                                                                                                                                                                 |                                                                                                                                                                                                                                                                                                      |                                                                                                                                                                                                                                                                                                                                                                                                                                                                                                                                                                                                                                                                                            |  |
|------------------------------------------------------------------------------------------------------------------------------------------------------------------------------------------------------------------------------------------------------------------------------------------------------------------------------------------------------------------------------------------------------------------------------------------------------------------------------------------------------------------------------------------------------------------------------------------------------------------------------------------------------------------------------------------------------------------------------------------------------------------------------------------------------------------------------------------------------------------------------------------------------------------------------------------------------------------------------------------------------------------------------------------------------------------------------------------------------------------------------------------------------------------------------------------------------------------------------------------------------------------------------------------------------------------------------------------------------------------------------------------------|-----------|---------------------------------------------------------------------------------------------------------------------------------------------------------------------------------|------------------------------------------------------------------------------------------------------------------------------------------------------------------------------------------------------------------------------------------------------------------------------------------------------|--------------------------------------------------------------------------------------------------------------------------------------------------------------------------------------------------------------------------------------------------------------------------------------------------------------------------------------------------------------------------------------------------------------------------------------------------------------------------------------------------------------------------------------------------------------------------------------------------------------------------------------------------------------------------------------------|--|
| EPI_ISL_679337, EPI_ISL_679380,<br>EPI_ISL_679363, EPI_ISL_679365,<br>EPI_ISL_679389, EPI_ISL_679370                                                                                                                                                                                                                                                                                                                                                                                                                                                                                                                                                                                                                                                                                                                                                                                                                                                                                                                                                                                                                                                                                                                                                                                                                                                                                           |           |                                                                                                                                                                                 |                                                                                                                                                                                                                                                                                                      |                                                                                                                                                                                                                                                                                                                                                                                                                                                                                                                                                                                                                                                                                            |  |
| EPI_ISL_679381, EPI_ISL_679382, EPI_ISL_679383, EPI_ISL_679387, EPI_ISL_679389, EPI_ISL_679390, EPI_ISL_679392, EPI_ISL_679394, EPI_ISL_679395, EPI_ISL_679396, EPI_ISL_679397, EPI_ISL_679405                                                                                                                                                                                                                                                                                                                                                                                                                                                                                                                                                                                                                                                                                                                                                                                                                                                                                                                                                                                                                                                                                                                                                                                                 | see above | Liverpool Clinical Laboratories                                                                                                                                                 | COVID-19 Genomics UK (COG-UK) Consortium                                                                                                                                                                                                                                                             | Saim Haldeney, Anika Luczak, Steve Paterson, Julian Higgins, Alistair Darcy, M Almesadi, A Alzeizhi, Muhammad Atirullah, Shariq D. Amrington, Jones Benjamin, Eleanor G Bentley, Anu Chawla, Jordan J Clark, Angela Cowell, Richard Eccles, Isabel Garcia-Dorival, Alexander Gammell, Alessandro Geneta, PFR Gilmore, Richard Gregory, Ximeng Han, Catherine Hartley, Margaret Hughes, Mirren Iturriza-Gomara, James Johnson, L Liu, Jennifer Manson, Charidite Nelson, Elaine O'Toole, Cassie Olatibju, Rekehah Penrice-Harndi, Lucille Rambow, NP Randaie, Trevor Ian Robinson, Paul Sharma, Ghada T Shawli, James P Stewart, Neil Swanson, Esaterina Vamos, Joanna Wals, Mark Whitehead |  |
| EPI_ISL_679425, EPI_ISL_679427,<br>EPI_ISL_679432, EPI_ISL_679436,<br>EPI_ISL_679440, EPI_ISL_679445                                                                                                                                                                                                                                                                                                                                                                                                                                                                                                                                                                                                                                                                                                                                                                                                                                                                                                                                                                                                                                                                                                                                                                                                                                                                                           |           | University College London Hospital                                                                                                                                              | COVID-19 Genomics UK (COG-UK) Consortium                                                                                                                                                                                                                                                             | Judith Heaney, Matthew Byott, Catherine Hourigan, Dan Frampton, Stuart Kirk, Moira Spyer and Eleri Nastouli                                                                                                                                                                                                                                                                                                                                                                                                                                                                                                                                                                                |  |
| EPI_ISL_679448, EPI_ISL_679450, EPI_ISL_679464, EPI_ISL_679474, EPI_ISL_679480, EPI_ISL_679491, EPI_ISL_679496, EPI_ISL_679507, EPI_ISL_679529, EPI_ISL_679546, EPI_ISL_679548, EPI_ISL_679577, EPI_ISL_679580, EPI_ISL_679582, EPI_ISL_679583, EPI_ISL_679589, EPI_ISL_679594, EPI_ISL_679596, EPI_ISL_679597, EPI_ISL_679599, EPI_ISL_679602, EPI_ISL_679604, EPI_ISL_679606, EPI_ISL_679611, EPI_ISL_679614, EPI_ISL_679620, EPI_ISL_679622, EPI_ISL_679624, EPI_ISL_679628                                                                                                                                                                                                                                                                                                                                                                                                                                                                                                                                                                                                                                                                                                                                                                                                                                                                                                                 | see above | University College London, Great Ormond Street Hospital for Children NHS Foundation, Trust, Imperial College Healthcare NHS Trust                                               | COVID-19 Genomics UK (COG-UK) Consortium                                                                                                                                                                                                                                                             | Sergi Castellano, Rachel Williams, Mark Kristiansen, Paola Resernde Silva, Surando Roy, Tony Brooks, Helena Tujili, Paola Nicola, Patricia Dyal, Charlotte Williams, Leyza Cosset, Yasmin Parichhaya, Jaqueline Findlay, Samuel Weeks, Juliana Brown, Kathryn Harris, Paul Randell, James Price, Alison Holmes, Judith Brewer                                                                                                                                                                                                                                                                                                                                                              |  |
| EPI_ISL_679633, EPI_ISL_679634, EPI_ISL_679635, EPI_ISL_679636, EPI_ISL_679639, EPI_ISL_679642, EPI_ISL_679643, EPI_ISL_679644, EPI_ISL_679645, EPI_ISL_679646, EPI_ISL_679650, EPI_ISL_679652, EPI_ISL_679653, EPI_ISL_679656, EPI_ISL_679659, EPI_ISL_679661, EPI_ISL_679662, EPI_ISL_679663, EPI_ISL_679664, EPI_ISL_679665, EPI_ISL_679669, EPI_ISL_679670, EPI_ISL_679674, EPI_ISL_679679, EPI_ISL_679680, EPI_ISL_679681, EPI_ISL_679682, EPI_ISL_679683, EPI_ISL_679684, EPI_ISL_679685, EPI_ISL_679686, EPI_ISL_679687, EPI_ISL_679688, EPI_ISL_679689, EPI_ISL_679690, EPI_ISL_679693, EPI_ISL_679694, EPI_ISL_679695, EPI_ISL_679696, EPI_ISL_679697, EPI_ISL_679698, EPI_ISL_679699, EPI_ISL_679700, EPI_ISL_679701, EPI_ISL_679704, EPI_ISL_679711, EPI_ISL_679712, EPI_ISL_679714, EPI_ISL_679715, EPI_ISL_679716, EPI_ISL_679717, EPI_ISL_679718, EPI_ISL_679719, EPI_ISL_679720, EPI_ISL_679733, EPI_ISL_679739, EPI_ISL_679740, EPI_ISL_679744, EPI_ISL_679745, EPI_ISL_679746, EPI_ISL_679753, EPI_ISL_679756, EPI_ISL_679759, EPI_ISL_679760, EPI_ISL_679762, EPI_ISL_679766, EPI_ISL_679769, EPI_ISL_679777, EPI_ISL_679780, EPI_ISL_679782, EPI_ISL_679788, EPI_ISL_679790, EPI_ISL_679800, EPI_ISL_679806, EPI_ISL_679814, EPI_ISL_679821, EPI_ISL_679822, EPI_ISL_679823, EPI_ISL_679830, EPI_ISL_679831, EPI_ISL_679835, EPI_ISL_679856, EPI_ISL_679864, EPI_ISL_679850 | see above | COVID-19 Genomics UK (COG-UK) Consortium                                                                                                                                        | Tanya Goldobchik, David Borsari, George MacIntyre, Amy Trebes, Mariateresa de Cesare, Catrin Moore, Alex Mobbs, Anja Justice, Robert Shaw, Monique Anderson, Timothy Peio, Emma Wise, Nathan Moore, Jessica Lynch, Nick Cortes, Maléide Mori, Stephen Kidd, David Buck, John Todd, Christophe Fraser |                                                                                                                                                                                                                                                                                                                                                                                                                                                                                                                                                                                                                                                                                            |  |
| EPI_ISL_679853, EPI_ISL_679855, EPI_ISL_679858, EPI_ISL_679860, EPI_ISL_679864, EPI_ISL_679865, EPI_ISL_679866, EPI_ISL_679869, EPI_ISL_679870, EPI_ISL_679873, EPI_ISL_679874, EPI_ISL_679875, EPI_ISL_679877, EPI_ISL_679878, EPI_ISL_679879, EPI_ISL_679882, EPI_ISL_679886, EPI_ISL_679889, EPI_ISL_679894, EPI_ISL_679896, EPI_ISL_679897, EPI_ISL_679898, EPI_ISL_679899, EPI_ISL_679901, EPI_ISL_679903, EPI_ISL_679908, EPI_ISL_679909, EPI_ISL_679910, EPI_ISL_679911, EPI_ISL_679912, EPI_ISL_679915, EPI_ISL_679915, EPI_ISL_679919                                                                                                                                                                                                                                                                                                                                                                                                                                                                                                                                                                                                                                                                                                                                                                                                                                                 | see above | Virlogy Department, Sheffield Teaching Hospitals NHS Foundation Trust/Department of Infection, Immunity and Cardiovascular Disease, The Medical School, University of Sheffield | COVID-19 Genomics UK (COG-UK) Consortium                                                                                                                                                                                                                                                             | Thushan de Silva, Matthew Parker, Nikki Smith, Adri Arnyal, Rebecca Brown, Luke Green, Rachel Tucker, Paul Parsons, Danielle Groves, Katie Johnson, Laura Carriero, Alex Kealey, Dave Partridge, Matthew Wyles, Benjamin Lindsey, Meghan Yavuz, Mohammad Raza, Caiad Evans                                                                                                                                                                                                                                                                                                                                                                                                                 |  |
| EPI_ISL_679926, EPI_ISL_679927,<br>EPI_ISL_679928, EPI_ISL_679929,<br>EPI_ISL_679930, EPI_ISL_679932,<br>EPI_ISL_679934                                                                                                                                                                                                                                                                                                                                                                                                                                                                                                                                                                                                                                                                                                                                                                                                                                                                                                                                                                                                                                                                                                                                                                                                                                                                        |           | Queens Medical Centre, Clinical Microbiology Department / DeepSeq Nottingham                                                                                                    | COVID-19 Genomics UK (COG-UK) Consortium                                                                                                                                                                                                                                                             | Gemma Clark, Wendy Smith, Manjinder Khakhi, Vicki M Fleming, Michelle M Lister, Hannah Howson-Wells, Jonathan Ball, Patrick McCure, Joseph Chappell, Theochanis Tselertis, Nadine Holmes, Matthew Carlisle, Christopher Moore, Fai Sang, Johnny Debebe, Victoria Wright, Matthew Loose                                                                                                                                                                                                                                                                                                                                                                                                     |  |
| EPI_ISL_679946, EPI_ISL_679949,<br>EPI_ISL_679958, EPI_ISL_679959,<br>EPI_ISL_679982                                                                                                                                                                                                                                                                                                                                                                                                                                                                                                                                                                                                                                                                                                                                                                                                                                                                                                                                                                                                                                                                                                                                                                                                                                                                                                           |           | Lincolnshe Hospitals and DeepSeq Nottingham                                                                                                                                     | COVID-19 Genomics UK (COG-UK) Consortium                                                                                                                                                                                                                                                             | Nichola Duckworth, Tim Sloan, Sarah Walsh, Jonathan Ball, Patrick McCure, Joseph Chappell, Nadine Holmes, Matthew Carlisle, Christopher Moore, Fel Sang, Johnny Debebe, Victoria Wright, Matthew Loose                                                                                                                                                                                                                                                                                                                                                                                                                                                                                     |  |
| EPI_ISL_679969, EPI_ISL_679972,<br>EPI_ISL_679975, EPI_ISL_679976,<br>EPI_ISL_679980, EPI_ISL_679981,<br>EPI_ISL_679982, EPI_ISL_679983,<br>EPI_ISL_679984, EPI_ISL_679985                                                                                                                                                                                                                                                                                                                                                                                                                                                                                                                                                                                                                                                                                                                                                                                                                                                                                                                                                                                                                                                                                                                                                                                                                     | see above | Centre for Enzyme Innovation, University of Portsmouth / Translational Research Laboratory, Portsmouth Hospitals NHS Trust                                                      | COVID-19 Genomics UK (COG-UK) Consortium                                                                                                                                                                                                                                                             | Angela Beckett, Yann Bourgeois Garry Scarlett, Sharon Glaysier, Scott Elliott Kelly Bicknell, Robert Impoy, Alysson Loyd, Sarah Wylie, Ethan Butcher, Anoop Chauhan, Samuel Hobson                                                                                                                                                                                                                                                                                                                                                                                                                                                                                                         |  |
| EPI_ISL_679996, EPI_ISL_680001,<br>EPI_ISL_680003, EPI_ISL_680004                                                                                                                                                                                                                                                                                                                                                                                                                                                                                                                                                                                                                                                                                                                                                                                                                                                                                                                                                                                                                                                                                                                                                                                                                                                                                                                              |           | Virlogy Department, Sheffield Teaching Hospitals NHS Foundation Trust/Department of Infection, Immunity and Cardiovascular Disease, The Medical School, University of Sheffield | COVID-19 Genomics UK (COG-UK) Consortium                                                                                                                                                                                                                                                             | Thushan de Silva, Matthew Parker, Nikki Smith, Adri Arnyal, Rebecca Brown, Luke Green, Rachel Tucker, Paul Parsons, Danielle Groves, Katie Johnson, Laura Carriero, Alex Kealey, Dave Partridge, Matthew Wyles, Benjamin Lindsey, Meghan Yavuz, Mohammad Raza, Caiad Evans                                                                                                                                                                                                                                                                                                                                                                                                                 |  |
| EPI_ISL_680018, EPI_ISL_680021,<br>EPI_ISL_680023, EPI_ISL_680024,<br>EPI_ISL_680025, EPI_ISL_680026,<br>EPI_ISL_680028, EPI_ISL_680029,<br>EPI_ISL_680030                                                                                                                                                                                                                                                                                                                                                                                                                                                                                                                                                                                                                                                                                                                                                                                                                                                                                                                                                                                                                                                                                                                                                                                                                                     |           | Centre for Enzyme Innovation, University of Portsmouth / Translational Research Laboratory, Portsmouth Hospitals NHS Trust                                                      | COVID-19 Genomics UK (COG-UK) Consortium                                                                                                                                                                                                                                                             | Angela Beckett, Yann Bourgeois Garry Scarlett, Sharon Glaysier, Scott Elliott Kelly Bicknell, Robert Impoy, Alysson Loyd, Sarah Wylie, Ethan Butcher, Anoop Chauhan, Samuel Hobson                                                                                                                                                                                                                                                                                                                                                                                                                                                                                                         |  |
| EPI_ISL_680039, EPI_ISL_680040, EPI_ISL_680041, EPI_ISL_680043, EPI_ISL_680045, EPI_ISL_680047, EPI_ISL_680048, EPI_ISL_680049, EPI_ISL_680050, EPI_ISL_680052, EPI_ISL_680055, EPI_ISL_680057, EPI_ISL_680059, EPI_ISL_680060, EPI_ISL_680063, EPI_ISL_680064, EPI_ISL_680067, EPI_ISL_680068, EPI_ISL_680069, EPI_ISL_680077, EPI_ISL_680079, EPI_ISL_680083, EPI_ISL_680088, EPI_ISL_680092, EPI_ISL_680093, EPI_ISL_680096, EPI_ISL_680099, EPI_ISL_680100                                                                                                                                                                                                                                                                                                                                                                                                                                                                                                                                                                                                                                                                                                                                                                                                                                                                                                                                 | see above | Department of Pathology, University of Cambridge                                                                                                                                | COVID-19 Genomics UK (COG-UK) Consortium                                                                                                                                                                                                                                                             | Aminu S. Jahun, Yasmin Chaudhry, Grant Hall, Iliana Georgiana, Myra Hosmillo, Martin D. Curran, Maltie Bricket, Surendra Parmar, Ian Goodfellow                                                                                                                                                                                                                                                                                                                                                                                                                                                                                                                                            |  |
| EPI_ISL_680101, EPI_ISL_680103, EPI_ISL_680106, EPI_ISL_680108, EPI_ISL_680110, EPI_ISL_680112, EPI_ISL_680113, EPI_ISL_680115, EPI_ISL_680117, EPI_ISL_680118, EPI_ISL_680120, EPI_ISL_680122, EPI_ISL_680123, EPI_ISL_680125, EPI_ISL_680127, EPI_ISL_680129, EPI_ISL_680130, EPI_ISL_680132, EPI_ISL_680134, EPI_ISL_680135, EPI_ISL_680138, EPI_ISL_680141, EPI_ISL_680142, EPI_ISL_680144, EPI_ISL_680145, EPI_ISL_680146, EPI_ISL_680148, EPI_ISL_680149, EPI_ISL_680150, EPI_ISL_680151, EPI_ISL_680157, EPI_ISL_680159, EPI_ISL_680160, EPI_ISL_680163, EPI_ISL_680167, EPI_ISL_680169, EPI_ISL_680170, EPI_ISL_680171, EPI_ISL_680174, EPI_ISL_680175, EPI_ISL_680176, EPI_ISL_680178, EPI_ISL_680179, EPI_ISL_680181, EPI_ISL_680182, EPI_ISL_680183, EPI_ISL_680186, EPI_ISL_680188, EPI_ISL_680189, EPI_ISL_680191, EPI_ISL_680192, EPI_ISL_680193, EPI_ISL_680195, EPI_ISL_680197                                                                                                                                                                                                                                                                                                                                                                                                                                                                                                 | see above | Virlogy Department, Sheffield Teaching Hospitals NHS Foundation Trust/Department of Infection, Immunity and Cardiovascular Disease, The Medical School, University of Sheffield | Thushan de Silva, Matthew Parker, Nikki Smith, Adri Arnyal, Rebecca Brown, Luke Green, Rachel Tucker, Paul Parsons, Danielle Groves, Katie Johnson, Laura Carriero, Alex Kealey, Dave Partridge, Matthew Wyles, Benjamin Lindsey, Meghan Yavuz, Mohammad Raza, Caiad Evans                           |                                                                                                                                                                                                                                                                                                                                                                                                                                                                                                                                                                                                                                                                                            |  |
| EPI_ISL_680199, EPI_ISL_680202, EPI_ISL_680203, EPI_ISL_680209, EPI_ISL_680210, EPI_ISL_680211, EPI_ISL_680227, EPI_ISL_680241, EPI_ISL_680244, EPI_ISL_680246, EPI_ISL_680260, EPI_ISL_680282, EPI_ISL_680301, EPI_ISL_680307, EPI_ISL_680320, EPI_ISL_680324, EPI_ISL_680351, EPI_ISL_680353, EPI_ISL_680358, EPI_ISL_680376, EPI_ISL_680422, EPI_ISL_680436                                                                                                                                                                                                                                                                                                                                                                                                                                                                                                                                                                                                                                                                                                                                                                                                                                                                                                                                                                                                                                 | see above | Regional Virus Laboratory, Belfast Health and Social Care Trust                                                                                                                 | COVID-19 Genomics UK (COG-UK) Consortium                                                                                                                                                                                                                                                             | Conall McCaughey, James McKenna, Tanya Curran, Susan Feeney, Alison Watt, Ciara Cox, Mairead Cormor, Zoltan Molnar, David Simpson, Derek Falley                                                                                                                                                                                                                                                                                                                                                                                                                                                                                                                                            |  |
| EPI_ISL_680446, EPI_ISL_680448,<br>EPI_ISL_680449, EPI_ISL_680452,<br>EPI_ISL_680454, EPI_ISL_680456,<br>EPI_ISL_680457, EPI_ISL_680458,<br>EPI_ISL_680460                                                                                                                                                                                                                                                                                                                                                                                                                                                                                                                                                                                                                                                                                                                                                                                                                                                                                                                                                                                                                                                                                                                                                                                                                                     | see above | West of Scotland Specialist Virlogy Centre, NHS SGCC / MRC-University of Glasgow Centre for Virus Research                                                                      | COVID-19 Genomics UK (COG-UK) Consortium                                                                                                                                                                                                                                                             | Ana da Silva Filipe, Natasha Johnson, Kathy Smollett, Daniel Mair, Stephen Carmichael, Alice Brooks, Lily Tong, Jenna Nicholas, Kyraki Nomiou, Sarah Mcdonald, Richard Oron, Joseph Hughes, Sirenu Vardoulakis, David L Robertson, Alasdair Maclean, Roy Gunson, Shaif Shaaban, Matthew Holden, Rachel Blacow, Guy Mollett, Kathy Li, James Shropshire, Antonia Ho, Emma Thomson                                                                                                                                                                                                                                                                                                           |  |
| EPI_ISL_680461, EPI_ISL_680464, EPI_ISL_680465, EPI_ISL_680466, EPI_ISL_680467, EPI_ISL_680468, EPI_ISL_680469, EPI_ISL_680470, EPI_ISL_680471, EPI_ISL_680472, EPI_ISL_680473, EPI_ISL_680474, EPI_ISL_680475, EPI_ISL_680476, EPI_ISL_680477, EPI_ISL_680478, EPI_ISL_680479, EPI_ISL_680480, EPI_ISL_680486, EPI_ISL_680488, EPI_ISL_680489, EPI_ISL_680492, EPI_ISL_680494, EPI_ISL_680495, EPI_ISL_680496, EPI_ISL_680497, EPI_ISL_680498, EPI_ISL_680499, EPI_ISL_680500, EPI_ISL_680501, EPI_ISL_680502, EPI_ISL_680503, EPI_ISL_680504, EPI_ISL_680505, EPI_ISL_680506, EPI_ISL_680507, EPI_ISL_680508, EPI_ISL_680509, EPI_ISL_680510, EPI_ISL_680513, EPI_ISL_680514, EPI_ISL_680515, EPI_ISL_680516, EPI_ISL_680518, EPI_ISL_680519, EPI_ISL_680522, EPI_ISL_680523, EPI_ISL_680524, EPI_ISL_680525, EPI_ISL_680526, EPI_ISL_680527, EPI_ISL_680528, EPI_ISL_680529, EPI_ISL_680531, EPI_ISL_680532, EPI_ISL_680533, EPI_ISL_680534, EPI_ISL_680535, EPI_ISL_680536, EPI_ISL_680537, EPI_ISL_680539, EPI_ISL_680540, EPI_ISL_680541, EPI_ISL_680544, EPI_ISL_680545, EPI_ISL_680546, EPI_ISL_680547, EPI_ISL_680548, EPI_ISL_680549, EPI_ISL_680550, EPI_ISL_680552, EPI_ISL_680555                                                                                                                                                                                                 | see above | Virlogy Department, Royal Infirmary of Edinburgh, NHS                                                                                                                           | COVID-19 Genomics UK (COG-UK) Consortium                                                                                                                                                                                                                                                             | McHugh M. Dewar, R. Rookie, S. Gallagher, M. Balcacza, C. O'Toole A., Scher, E. Hill, V. McCorne, J.T. Colquhoun, R. Yu, X. Jackson, B. Rambaut, A. Williams, T.C. see above                                                                                                                                                                                                                                                                                                                                                                                                                                                                                                               |  |





EPI\_ISL\_693635, EPI\_ISL\_686636, EPI\_ISL\_683637, EPI\_ISL\_683639, EPI\_ISL\_683640, EPI\_ISL\_683641, EPI\_ISL\_683642, EPI\_ISL\_683643, EPI\_ISL\_683644, EPI\_ISL\_683645, EPI\_ISL\_683646, EPI\_ISL\_683647, EPI\_ISL\_683648, EPI\_ISL\_683649, EPI\_ISL\_683650, EPI\_ISL\_683651, EPI\_ISL\_683652, EPI\_ISL\_683653, EPI\_ISL\_683654, EPI\_ISL\_686655, EPI\_ISL\_683656

see above

Servicio de Microbiología, Laboratorio Clínic Metropolitana Nord, Hospital Universitari Germans Trias i Pujol, Institut d'Investigació en Ciències de la Salut Germans Trias i Pujol (IGTP)

SeqCOVID-SPAIN consortium/BV(CSIC)

Elisa Marró, Antoni E. Bordoy, Anna Not, Adrián Antuori, Anabel Fernández, Nona Romani, Verónica Saludes, Cristina Casañ and SeqCOVID-SPAIN consortium

EPI\_ISL\_686547, EPI\_ISL\_686560, EPI\_ISL\_686562, EPI\_ISL\_686584, EPI\_ISL\_686585, EPI\_ISL\_686586, EPI\_ISL\_686587, EPI\_ISL\_686588, EPI\_ISL\_686589, EPI\_ISL\_686590, EPI\_ISL\_686591, EPI\_ISL\_686592, EPI\_ISL\_686596, EPI\_ISL\_686599, EPI\_ISL\_686600, EPI\_ISL\_686601, EPI\_ISL\_686606, EPI\_ISL\_686607, EPI\_ISL\_686611

see above

Respiratory Virus Unit, Microbiology Services Colindale, Public Health England

COVID-19 Genomics UK (COG-UK) Consortium

PHE Covid Sequencing Team

EPI\_ISL\_691612, EPI\_ISL\_691613, EPI\_ISL\_691616, EPI\_ISL\_691617, EPI\_ISL\_691622, EPI\_ISL\_691624, EPI\_ISL\_691626, EPI\_ISL\_691627, EPI\_ISL\_691629, EPI\_ISL\_691630, EPI\_ISL\_691631, EPI\_ISL\_691634, EPI\_ISL\_691638, EPI\_ISL\_691641, EPI\_ISL\_691646, EPI\_ISL\_691647, EPI\_ISL\_691648, EPI\_ISL\_691649, EPI\_ISL\_691650, EPI\_ISL\_691652, EPI\_ISL\_691654, EPI\_ISL\_691655, EPI\_ISL\_691656, EPI\_ISL\_691657, EPI\_ISL\_691658, EPI\_ISL\_691660, EPI\_ISL\_691664, EPI\_ISL\_691665, EPI\_ISL\_691667, EPI\_ISL\_691668, EPI\_ISL\_691669, EPI\_ISL\_691670, EPI\_ISL\_691671, EPI\_ISL\_691672, EPI\_ISL\_691673, EPI\_ISL\_691674, EPI\_ISL\_691675, EPI\_ISL\_691676, EPI\_ISL\_691678, EPI\_ISL\_691679

Servicio de Microbiología, Hospital Universitario Son Espases

SeqCOVID-SPAIN consortium/BV(CSIC)

Carla Lopez-Causapé, Jordi Reina, Antonio Oliver and SeqCOVID-SPAIN consortium

EPI\_ISL\_691686, EPI\_ISL\_691688, EPI\_ISL\_691690, EPI\_ISL\_691692, EPI\_ISL\_691694, EPI\_ISL\_691695, EPI\_ISL\_691696, EPI\_ISL\_691697, EPI\_ISL\_691698, EPI\_ISL\_691699

Hospital Universitario de Cádiz

Igestas-Caballero, M. Camarero, S. Molinero Calamita, M. González-Esguevillas, M. Pozo, F. Casas, I. Jiménez, P. Jiménez, M. Zaballos, A. Monzón, S. Varona, S. Juliá, M. Cuesta, I. García, M. Varona, S. Juliá, M. Cuesta, I. Rodríguez, S. Varona, S. Juliá, M. Cuesta, I. Hlilano, S.

EPI\_ISL\_691700, EPI\_ISL\_691701, EPI\_ISL\_691702, EPI\_ISL\_691703, EPI\_ISL\_691704, EPI\_ISL\_691705, EPI\_ISL\_691706, EPI\_ISL\_691707, EPI\_ISL\_691709, EPI\_ISL\_691710, EPI\_ISL\_691711, EPI\_ISL\_691712, EPI\_ISL\_691713, EPI\_ISL\_691714, EPI\_ISL\_691715, EPI\_ISL\_691716, EPI\_ISL\_691718, EPI\_ISL\_691719, EPI\_ISL\_691720, EPI\_ISL\_691721, EPI\_ISL\_691722, EPI\_ISL\_691723, EPI\_ISL\_691724, EPI\_ISL\_691725, EPI\_ISL\_691726, EPI\_ISL\_691727, EPI\_ISL\_691728

Hospital Clínico San Carlos

Igestas-Caballero, M. Camarero, S. Molinero Calamita, M. González-Esguevillas, M. Pozo, F. Casas, I. Jiménez, P. Jiménez, M. Zaballos, A. Monzón, S. Varona, S. Juliá, M. Cuesta, I. Alhambra, A. Varona, S. Juliá, M. Cuesta, I. Alhambra, A. Son Nguyen et al

see above

Hospital Universitario Severo Ochoa

Igestas-Caballero, M. Camarero, S. Molinero Calamita, M. González-Esguevillas, M. Pozo, F. Casas, I. Jiménez, P. Jiménez, M. Zaballos, A. Monzón, S. Varona, S. Juliá, M. Cuesta, I. Rodríguez, I.

EPI\_ISL\_691729, EPI\_ISL\_691730

Hospital Universitario Puerta de Hierro

Igestas-Caballero, M. Camarero, S. Molinero Calamita, M. González-Esguevillas, M. Pozo, F. Casas, I. Jiménez, P. Jiménez, M. Zaballos, A. Monzón, S. Varona, S. Juliá, M. Cuesta, I. García, M. Varona, S. Juliá, M. Cuesta, I. Rodríguez, S. Varona, S. Juliá, M. Cuesta, I. Alhambra, A.

EPI\_ISL\_691731

Hospital de Madrid

Igestas-Caballero, M. Camarero, S. Molinero Calamita, M. González-Esguevillas, M. Pozo, F. Casas, I. Jiménez, P. Jiménez, M. Zaballos, A. Monzón, S. Varona, S. Juliá, M. Cuesta, I. Alhambra, A.

EPI\_ISL\_691732

Instituto de Salud Carlos III

Igestas-Caballero, M. Camarero, S. Molinero Calamita, M. González-Esguevillas, M. Pozo, F. Casas, I. Jiménez, P. Jiménez, M. Zaballos, A. Monzón, S. Varona, S. Juliá, M. Cuesta, I. Alhambra, A.

EPI\_ISL\_692747, EPI\_ISL\_692759

CNR Virus des Infections Respiratoires - France SUD

CNR Virus des Infections Respiratoires - France SUD

Antonin Bal, Gregory Destras, Gwendolynne Burfin, Solenne Brun, Marthe Valette, Bruno Lina, Laurence Jossot

EPI\_ISL\_693279

Public Health Virology Laboratory, Forensic and Scientific Services (PHV-FSS)

Public Health Virology Laboratory, Forensic and Scientific Services (PHV-FSS)

EPI\_ISL\_693392, EPI\_ISL\_693395, EPI\_ISL\_693409, EPI\_ISL\_693413, EPI\_ISL\_693414, EPI\_ISL\_693417, EPI\_ISL\_693420, EPI\_ISL\_693422, EPI\_ISL\_693423, EPI\_ISL\_693425, EPI\_ISL\_693426, EPI\_ISL\_693427, EPI\_ISL\_693429, EPI\_ISL\_693431, EPI\_ISL\_693432, EPI\_ISL\_693433, EPI\_ISL\_693437, EPI\_ISL\_693440, EPI\_ISL\_693443, EPI\_ISL\_693444, EPI\_ISL\_693447, EPI\_ISL\_693450, EPI\_ISL\_693456, EPI\_ISL\_693459, EPI\_ISL\_693460, EPI\_ISL\_693461, EPI\_ISL\_693462, EPI\_ISL\_693463, EPI\_ISL\_693465, EPI\_ISL\_693466, EPI\_ISL\_693467

Respiratory Virus Unit, Microbiology Services Colindale, Public Health England

COVID-19 Genomics UK (COG-UK) Consortium

PHE Covid Sequencing Team

EPI\_ISL\_693491, EPI\_ISL\_693495, EPI\_ISL\_693496, EPI\_ISL\_693771, EPI\_ISL\_693770, EPI\_ISL\_693771, EPI\_ISL\_693772, EPI\_ISL\_693774

CNR Virus des Infections Respiratoires - France SUD

General Practitioner

Antonin Bal, Gregory Destras, Gwendolynne Burfin, Quentin Semarais, Marthe Valette, Bruno Lina, Laurence Jossot

EPI\_ISL\_693788, EPI\_ISL\_693819, EPI\_ISL\_693820, EPI\_ISL\_693823, EPI\_ISL\_693827, EPI\_ISL\_693829, EPI\_ISL\_693831, EPI\_ISL\_693833, EPI\_ISL\_693841, EPI\_ISL\_693849, EPI\_ISL\_693861, EPI\_ISL\_693909, EPI\_ISL\_693932, EPI\_ISL\_693938, EPI\_ISL\_693948, EPI\_ISL\_693964, EPI\_ISL\_693977, EPI\_ISL\_693979, EPI\_ISL\_693984, EPI\_ISL\_693989, EPI\_ISL\_693995, EPI\_ISL\_693996

CNR Virus des Infections Respiratoires - France SUD

National Reference Center for Viruses of Respiratory Infections, Institut Pasteur, Paris

Marion Barbet, Sylvie Behillil, Méline Bizard, Angela Bisebarre, Camille Capel, Etienne Simon-Lorède, Vincent Erout, Maud Vanpeene, Sylvie van der Werf

EPI\_ISL\_693984, EPI\_ISL\_693989, EPI\_ISL\_693995, EPI\_ISL\_693996

Voilier AG

Department of Biosystems Science and Engineering, ETH Zürich

Christian Baisel, Sarah Nadeau, Chaoran Chen, Ivan Topolitsky, Pedro Ferreira, Philipp Jablonski, Susana Posada-Céspedes, Tobias Schär, Ina Nissen, Natascia Santacrose, Elodie Burcklen, Christiana Beckmann, Mauricio Ricardo, Olivier Kopel, Christoph Noppen, Sophie Seidel, Noémie Santamaría de Souza, Niko Baerentzen, Tanja Stadler

We gratefully acknowledge the following Authors from the Originating laboratories responsible for obtaining the specimens, as well as the Submitting laboratories where the genome data were generated and shared via GISAID, on which this research is based.

All Submitters of data may be contacted directly via [www.gisaid.org](http://www.gisaid.org)

Authors are sorted alphabetically.

| Accession ID                                                                   | Originating Laboratory                                                                                                                                                                                                          | Submitting Laboratory                                                          | Authors                                                                                                                                                                                                                                                                                                                                                                                                                                                                                                                                                                                                                                     |
|--------------------------------------------------------------------------------|---------------------------------------------------------------------------------------------------------------------------------------------------------------------------------------------------------------------------------|--------------------------------------------------------------------------------|---------------------------------------------------------------------------------------------------------------------------------------------------------------------------------------------------------------------------------------------------------------------------------------------------------------------------------------------------------------------------------------------------------------------------------------------------------------------------------------------------------------------------------------------------------------------------------------------------------------------------------------------|
| EPI_ISL_402131                                                                 | Wuhan Institute of Virology, Chinese Academy of Sciences                                                                                                                                                                        | Wuhan Institute of Virology, Chinese Academy of Sciences                       | Yan Zhu, Ping Yu, Bei Li, Ben Hu, Hao-Fu Si, Xing-Lou Yang, Peng Zhou, Zheng-Li Shi                                                                                                                                                                                                                                                                                                                                                                                                                                                                                                                                                         |
| EPI_ISL_422424                                                                 | Jaber Al Ahmad Al Sabah Hospital                                                                                                                                                                                                | Dasmari diabetes Institute                                                     | Fahd Al-Mulida, Rasheeda Iqbal, Sumi John, Easa Al-Ozairi, Qais Al-Duwairi                                                                                                                                                                                                                                                                                                                                                                                                                                                                                                                                                                  |
| EPI_ISL_422850                                                                 | Dutch COVID-19 response team                                                                                                                                                                                                    | Erasmus Medical Center                                                         | Bas Oude Munnink, David Nieuwenhuisje, Reina Sikkema, Claudia Schapendonk, Irma Christakova, Anne van der Linden, Theo Bastebroer, Stefan van Nieuwkoop, Mark Fronk, Pascal Lexmond, Corien Swaan, Marlon Havertak, Madeleine Moliers, Marj Stejn, Sandra Kengre Kamga Mboou, Jeroen van Kampen, Jolanda Voermans, Aura Timen, Corine GeurtsvanKessel, Annemiek van der Eijk, Richard Molenkamp, Marlon Koopmans, on behalf of the Dutch national COVID-19 response team.                                                                                                                                                                   |
| EPI_ISL_429673                                                                 | Central Public Health Laboratory/Octávio Magalhães Institute (ICM) from the Ezequiel Dias Foundation (FUNED)                                                                                                                    | Instituto Octávio Magalhães / Fundação Ezequiel Dias (IOMF/uned)               | Tailia Adilino, Jolison Xavier, Maria Giovaretti, Vagner Fonseca, Marcos Vinícius Silva, Luiz Carlos Junior Alcantara, Marluce Aparecida Assunção Oliveira                                                                                                                                                                                                                                                                                                                                                                                                                                                                                  |
| EPI_ISL_430339                                                                 | NVU Langone Health                                                                                                                                                                                                              | Departments of Pathology and Medicine, New York University School of Medicine  | Maria Agüero-Roseñfeld, Brendan Belovarac, Margaret Black, Ludovic Boyard, John Cadley, Paolo Cozza, John Chen, Dacia Dimartino, Xiaojun Feng, Tatyana Gindin, Emily Guzman, Adriana Heguy, Megan Hogan, Emily Huang, George Jour, Lawrence H. Liu, Raven Luther, Andrew Lytle, Christian Marier, Matthew T. Maurano, Mark J. Mulligan, Peter Meyer, Raquel Ordóñez Ciriza, Iman Osman, Jared Pinnell, Vanessa Raabe, Sittaram Ramaswami, Amy Rakiewicz, Andre M. Ribeiro-dos-Santos, Marie Samanovic-Golden, Antonio Serrano, Guomiao Shen, Melissa Strudler, Theodore Vougloukakis, Nick Vulpescu, Gabe Westby, Paul Zapple, Yulong Zhang |
| EPI_ISL_436453                                                                 | National Centre for Disease Control (NCDC)                                                                                                                                                                                      | NCDC/CISIR-HIGB                                                                | Premod Kumar†, Rajesh Pande†, Pooja Sharma, Mahesh S Dhar, Vivekanand A. Bharathram Uppli, Himanshu Vashisht, Sanchi Madhwa, Nishu Tyagi, Uma Sharma, Piyanka Singh, Hemata Lal, Meena Datta, Poojan Gupta, Nishi Saini, Aarti Tewari, Bhubash Nandi, Dhruvendra Kumar, Sayabata Baga, Varun Jaiswal, Hema Gogia, Prashit Wadani, Shrinia Singh, Prateek Singh, Debasis Dash, Mahi Mukerji, Manju Bala, Sandhya Kabra, Sujat Singh, Mohammed Faouq, Anurag Agrawal †, Partha Hasnati                                                                                                                                                        |
| EPI_ISL_447464                                                                 | Clinical Microbiology Laboratory, Sheba Medical Center                                                                                                                                                                          | Stem Lab                                                                       |                                                                                                                                                                                                                                                                                                                                                                                                                                                                                                                                                                                                                                             |
| EPI_ISL_457831                                                                 | National Public Health Laboratory                                                                                                                                                                                               | KEMRI-Wellcome Trust Research Programme/KEMRI-CGMH-C-Kilifi                    | Githinji G. et al 2020                                                                                                                                                                                                                                                                                                                                                                                                                                                                                                                                                                                                                      |
| EPI_ISL_458235                                                                 | KU Leuven, Rega Institute, Clinical and Epidemiological Virology                                                                                                                                                                | KU Leuven, Rega Institute, Clinical and Epidemiological Virology               | Tony Wainina-Bokelanga, Bert Vanmechelen, Joan Mari-Carreiras, Piet Maes                                                                                                                                                                                                                                                                                                                                                                                                                                                                                                                                                                    |
| EPI_ISL_461341, EPI_ISL_461360                                                 | Dutch COVID-19 response team                                                                                                                                                                                                    | Erasmus Medical Center                                                         | Bas Oude Munnink, David Nieuwenhuisje, Reina Sikkema, Claudia Schapendonk, Irma Christakova, Anne van der Linden, Theo Bastebroer, Stefan van Nieuwkoop, Mark Fronk, Pascal Lexmond, Corien Swaan, Marlon Havertak, Madeleine Moliers, Marj Stejn, Sandra Kengre Kamga Mboou, Jeroen van Kampen, Jolanda Voermans, Aura Timen, Corine GeurtsvanKessel, Annemiek van der Eijk, Richard Molenkamp, Marlon Koopmans, on behalf of the Dutch national COVID-19 response team.                                                                                                                                                                   |
| EPI_ISL_466319, EPI_ISL_466443                                                 | Respiratory Virus Unit, Microbiology Services Colindale, Public Health England                                                                                                                                                  | Respiratory Virus Unit, Microbiology Services Colindale, Public Health England | PHE Covid Sequencing Team                                                                                                                                                                                                                                                                                                                                                                                                                                                                                                                                                                                                                   |
| EPI_ISL_466978                                                                 | Vollier AG                                                                                                                                                                                                                      | Department of Biosystems Science and Engineering, ETH Zürich                   | Christian Beisel, Saran Nadeau, Ivan Topolitsky, Philipp Jablonski, Susana Posada-Céspedes, Tobias Schär, Ina Nissen, Natascia Santacroce, Elodie Burcklen, Christiane Beckmann, Maurice Redondo, Olivier Kobel, Christoph Noppén, Sophie Seidel, Noemie Santamaria de Souza, Niko Beerewinkel, Tanja Städel                                                                                                                                                                                                                                                                                                                                |
| EPI_ISL_468078                                                                 | Child Health Research Foundation                                                                                                                                                                                                | Child Health Research Foundation                                               | Sanjuti Saha, Roy Malaker, IM Saitul Islam Sajid, Hatzir Bahman, Atroza Akter Tanni, Syed Mukhtar, Al Sum, Maksud Islam, Samir K Saha                                                                                                                                                                                                                                                                                                                                                                                                                                                                                                       |
| EPI_ISL_468256, EPI_ISL_468269                                                 | Vollier AG                                                                                                                                                                                                                      | Department of Biosystems Science and Engineering, ETH Zürich                   | Christian Beisel, Saran Nadeau, Ivan Topolitsky, Pedro Ferreira, Philipp Jablonski, Susana Posada-Céspedes, Tobias Schär, Ina Nissen, Natascia Santacroce, Elodie Burcklen, Christiane Beckmann, Maurice Redondo, Olivier Kobel, Christoph Noppén, Sophie Seidel, Noemie Santamaria de Souza, Niko Beerewinkel, Tanja Städel                                                                                                                                                                                                                                                                                                                |
| EPI_ISL_476778                                                                 | Stanford clinical virology lab                                                                                                                                                                                                  | Chan-Zuckerberg Biobud                                                         | Benjamin Pinkley, Katherine Walker, Victoria N. Parkhi, John Gozdzynski, Hannah N. DeJong, Matthew T. Wheeler, Jason Andrews, Manuel Rivas, Carlos Bustamante, Euan Ashley, with CZB Giraudi Consortium                                                                                                                                                                                                                                                                                                                                                                                                                                     |
| EPI_ISL_508049                                                                 | New Mexico Department of Health Scientific Laboratory Division                                                                                                                                                                  | Center for Global Health, University of New Mexico Health Sciences Center      | Daryl Dorman, Kurt Schwalm, Twila Kunde, Joseph Hicks, Michael Edwards, Darrell Dinwiddie                                                                                                                                                                                                                                                                                                                                                                                                                                                                                                                                                   |
| EPI_ISL_509614                                                                 | Servicio de Microbiología, Hospital Universitario Donostia, OSI Donostialdea, Área de Enfermedades Infecciosas, Grupo de Infección Respiratoria y Resistencia Antimicrobiana, Instituto de Investigación Santitania Biodonostia | SeqCOVID-SPAIN consortium/IBV(CSIC)                                            | Gustavo Cilla, Milagrosa Montes, Luis Prieto, Jose Maria Marinich and SeqCOVID-SPAIN consortium                                                                                                                                                                                                                                                                                                                                                                                                                                                                                                                                             |
| EPI_ISL_510775, EPI_ISL_512021, EPI_ISL_512052                                 | Vollier AG                                                                                                                                                                                                                      | Department of Biosystems Science and Engineering, ETH Zürich                   | Christian Beisel, Saran Nadeau, Ivan Topolitsky, Philipp Jablonski, Susana Posada-Céspedes, Tobias Schär, Ina Nissen, Natascia Santacroce, Elodie Burcklen, Christiane Beckmann, Maurice Redondo, Olivier Kobel, Christoph Noppén, Sophie Seidel, Noemie Santamaria de Souza, Niko Beerewinkel, Tanja Städel                                                                                                                                                                                                                                                                                                                                |
| EPI_ISL_512092                                                                 | National Virus Reference Laboratory                                                                                                                                                                                             | National Virus Reference Laboratory                                            | Luke W Meredith, M. Easte Tröck, Myra Hoshino, William L. Hamilton, Martin D. Curran, Theresa Fairwell, Grant Hall, Anna Yakovleva, Fahad A Khochbar, Charadee J. Houdcroft, Laura G. Celler, Annu S. Jahan, Sarah L. Caddy, Yasmini Chaturthy, Matee Prondert, Ian Goodfellow                                                                                                                                                                                                                                                                                                                                                              |
| EPI_ISL_514451                                                                 | Department of Pathology, University of Cambridge                                                                                                                                                                                | COVID-19 Genomics UK (COG-UK) Consortium                                       | Michael Carr, Gabriel Gonzalez, Jonathan Dean, Aditi Chaturvedi, Susea Cougghan, Cillian F. De Gascun                                                                                                                                                                                                                                                                                                                                                                                                                                                                                                                                       |
| EPI_ISL_516578                                                                 | Vollier AG                                                                                                                                                                                                                      | Department of Biosystems Science and Engineering, ETH Zürich                   | Christian Beisel, Saran Nadeau, Ivan Topolitsky, Pedro Ferreira, Philipp Jablonski, Susana Posada-Céspedes, Tobias Schär, Ina Nissen, Natascia Santacroce, Elodie Burcklen, Christiane Beckmann, Maurice Redondo, Olivier Kobel, Christoph Noppén, Sophie Seidel, Noemie Santamaria de Souza, Niko Beerewinkel, Tanja Städel                                                                                                                                                                                                                                                                                                                |
| EPI_ISL_516579, EPI_ISL_516563                                                 |                                                                                                                                                                                                                                 |                                                                                | Kevin K.W. To, Kwok-Yung Yuen                                                                                                                                                                                                                                                                                                                                                                                                                                                                                                                                                                                                               |
| EPI_ISL_516799                                                                 | Department of Microbiology, The University of Hong Kong                                                                                                                                                                         | Department of Microbiology, The University of Hong Kong                        | Ana da Silva Filipe, Nataasha Johnson, Kathy Smollett, Daniel Mir, Stephen Cammichiani, Lily Tong, Jemma Nichols, Elinu Aranday-Cortes, Krispin Brunker, Yasin Parr, Alice Brooks, Kyriaki Nomiou, Saran McConrad, Marc Niebel, Palawee Assamphan, Richard Oton, Joseph Hughes, Sreenu Vaitipally, David L. Robertson, Alexander Maclean, Roy Gursorn, Kathy Li, Natasha Jesudason, Rajiv Shah, James Shepherd, Antonia Ho, Emma Thomson                                                                                                                                                                                                    |
| EPI_ISL_517981                                                                 | West of Scotland Specialist Virology Centre, NHSGCG / MRC-University of Glasgow Centre for Virus Research                                                                                                                       | COVID-19 Genomics UK (COG-UK) Consortium                                       | McHugh M, Dewar R, Rooke S, Gallagher M, Balcaza C, O'Toole Á, Schar E, Hill V, McCormac JT, Coddighoun R, Yu X, Jackson B, Rambaut A, Williams TC, Temperton K                                                                                                                                                                                                                                                                                                                                                                                                                                                                             |
| EPI_ISL_517988                                                                 | Virology Department, Royal Infirmary of Edinburgh, NHS Lothian / School of Biological Sciences, University of Edinburgh / Institute of Genetics and Molecular Medicine, University of Edinburgh                                 | COVID-19 Genomics UK (COG-UK) Consortium                                       | Bas Oude Munnink, David Nieuwenhuisje, Reina Sikkema, Claudia Schapendonk, Irma Christakova, Anne van der Linden, Theo Bastebroer, Stefan van Nieuwkoop, Mark Fronk, Pascal Lexmond, Corien Swaan, Marlon Havertak, Madeleine Moliers, Marj Stejn, Sandra Kengre Kamga Mboou, Jeroen van Kampen, Jolanda Voermans, Aura Timen, Corine GeurtsvanKessel, Annemiek van der Eijk, Richard Molenkamp, Marlon Koopmans, on behalf of the Dutch national COVID-19 response team                                                                                                                                                                    |
| EPI_ISL_523457, EPI_ISL_523545, EPI_ISL_523729, EPI_ISL_523901, EPI_ISL_523907 | Dutch COVID-19 response team                                                                                                                                                                                                    | Erasmus Medical Center                                                         |                                                                                                                                                                                                                                                                                                                                                                                                                                                                                                                                                                                                                                             |

|                                                                                                                                                |                                                                                                                                                                                                  |                                                                                               |                                                                                                                                                                                                                                                                                                                                                                                                                                                                                                                                                                                              |
|------------------------------------------------------------------------------------------------------------------------------------------------|--------------------------------------------------------------------------------------------------------------------------------------------------------------------------------------------------|-----------------------------------------------------------------------------------------------|----------------------------------------------------------------------------------------------------------------------------------------------------------------------------------------------------------------------------------------------------------------------------------------------------------------------------------------------------------------------------------------------------------------------------------------------------------------------------------------------------------------------------------------------------------------------------------------------|
| EPI_ISL_523667, EPI_ISL_523668, EPI_ISL_523669, EPI_ISL_523671, EPI_ISL_523674, EPI_ISL_523683, EPI_ISL_523688, EPI_ISL_523689, EPI_ISL_523692 | Vollier AG                                                                                                                                                                                       | Department of Biosystems Science and Engineering, ETH Zurich                                  | Christian Bessel, Sarah Nadeau, Ivan Topolitsky, Pedro Ferreira, Philipp Jablonksi, Susana Posada-Céspedes, Tobias Schar, Ina Nissen, Natascha Santoro, Etzold Burcken, Christiane Beckmann, Maurice Beckmann, Amir Borge, Shweta Kawarkar, Vasil Nachian, Niko Beerwinkler, Tanja Stadler                                                                                                                                                                                                                                                                                                   |
| EPI_ISL_525358, EPI_ISL_525373, EPI_ISL_525374                                                                                                 | National Virus Reference Laboratory                                                                                                                                                              | National Virus Reference Laboratory                                                           | Michael Carr, Gabriel Gonzalez, Jonathan Dean, Aditi Chaturvedi, Suzie Coughlan, Cillian F De Gascon                                                                                                                                                                                                                                                                                                                                                                                                                                                                                         |
| EPI_ISL_526427                                                                                                                                 | Queens Medical Centre, Clinical Microbiology Department / DeepSeq Nottingham                                                                                                                     | COVID-19 Genomics UK (COG-UK) Consortium                                                      | Gemma Clark, Wendy Smith, Manjinder Khakh, Vicki M Fleming, Michelle M Lister, Hannah Howson-Wells, Jonathan Ball, Patrick McCure, Joseph Chappell, Theodoros Tselendis, Nadine Holmes, Matthew Carlisle, Christopher Moore, Fai Sang, Johnny Debebe, Victoria Wright, Matthew Loose                                                                                                                                                                                                                                                                                                         |
| EPI_ISL_528394                                                                                                                                 | Respiratory Virus Unit, Microbiology Services Colindale, Public Health England                                                                                                                   | Respiratory Virus Unit, Microbiology Services Colindale, Public Health England                | PHE Covid Sequencing Team                                                                                                                                                                                                                                                                                                                                                                                                                                                                                                                                                                    |
| EPI_ISL_528425                                                                                                                                 | P. D. Hinduja Hospital and Medical Research Centre                                                                                                                                               | Institute of Genomics and Integrative Biology - Council of Scientific and Industrial Research | Rajesh Pandey, Jayanth Shastri, Akshay Kanakan, Vivekanand A. Jagan Srinivasa Vasudevan, Ranjeet Maurya, Sachee Agrawal, Niphar Chatterjee, Swapnil Parikh, Manish Pathak, Subrat Thanagati, Jasmina Savak, Suresh Poojari, Mahesh Sangar, Anil Borge, Shweta Kawarkar, Vasil Nachian, Mayuresh Vishwanathan, Shruti Sachidanandan, Shruti Pophale, Utkarsha Velve                                                                                                                                                                                                                           |
| EPI_ISL_529452, EPI_ISL_528480, EPI_ISL_529482                                                                                                 | National Virus Reference Laboratory                                                                                                                                                              | National Virus Reference Laboratory                                                           | Michael Carr, Gabriel Gonzalez, Jonathan Dean, Suzie Coughlan, Cillian F De Gascon                                                                                                                                                                                                                                                                                                                                                                                                                                                                                                           |
| EPI_ISL_529315, EPI_ISL_529316                                                                                                                 | West of Scotland Specialist Virology Centre, NHSGGC / MRC-University of Glasgow Centre for Virus Research                                                                                        | COVID-19 Genomics UK (COG-UK) Consortium                                                      | Ana da Silva Filipe, Nataasha Johnson, Kathy Smollett, Daniel Mar, Stephen Carmichael, Lily Tong, Jenna Nichols, Elinu Aranday-Cortes, Kristyn Brunker, Yasmin Parr, Alice Broos, Kyriaki Nomiku, Sarah McDonald, Marc Nebel, Patavase Assampan, Richard Orton, Joseph Hughes, Steenu Vaitipally, David L. Robertson, Alastair MacLean, Rory Gunson, Katy LI, Natasha Jesudasan, Rajiv Shah, James Shepherd, Antonia Ho, Alice Broos, Emma Thomson                                                                                                                                           |
| EPI_ISL_529317                                                                                                                                 | Virology Department, Royal Infirmary of Edinburgh, NHS Lothian / School of Biological Sciences, University of Edinburgh / Institute of Genetics and Molecular Medicine, University of Birmingham | COVID-19 Genomics UK (COG-UK) Consortium                                                      | McHugh M, Dewar R, Rooke S, Gallagher M, Balcaza C, O'Toole A, Schar E, Hill V, McCrone JT, Coiduhoun R, Yu X, Jackson B, Rambaut A, Williams TC, Templeton K                                                                                                                                                                                                                                                                                                                                                                                                                                |
| EPI_ISL_529334                                                                                                                                 | University of Birmingham                                                                                                                                                                         | COVID-19 Genomics UK (COG-UK) Consortium                                                      | Institute of Microbiology, University of Birmingham, Claire McMurray, Joanne Stockton, Samuel Nicholas, Radoslaw Poplawski, Will Rowe, Josh Quirk, Nicholas Loman, University of Birmingham Testing Laboratory, Ceilina M Whalley, Andrew Bosworth, Charlotte Poxon, Kasun Wangasooriya, Oliver Pickles, Mike Kidd, Alex Richter, Andrew D Baggis PHE Headlands Lab, Husan Osman, Andrew Bosworth, Queen Elizabeth Hospital, Anna Casey                                                                                                                                                      |
| EPI_ISL_529523                                                                                                                                 | Quadram Institute Bioscience                                                                                                                                                                     | COVID-19 Genomics UK (COG-UK) Consortium                                                      | Dave J Baker, Gemma L Kay, Ali Aydin, Than Le-Viet, Steven Rudder, Ana P. Tedim, Anastasia Kolyva, Maria Diaz, Leonardo de Oliveira Martins, Nabil-Faried Alkhran, Lizzie Meadows, Rachael Stanley, Ngozi Eunurojo, Muhammad Yasir, Nicholas M. Thomson, Alexander J Trotter, Rachel Gilroy, Samuel Bloomfield, Claire Stuart, Andrew Bell, Reemesh Prakash, Samr Dewsevic, Alison E. Mather, John Vain, Mark Webber, Andrew J Page, Justin O'Grady                                                                                                                                          |
| EPI_ISL_529551                                                                                                                                 | Queens Medical Centre, Clinical Microbiology Department / DeepSeq Nottingham                                                                                                                     | COVID-19 Genomics UK (COG-UK) Consortium                                                      | Gemma Clark, Wendy Smith, Manjinder Khakh, Vicki M Fleming, Michelle M Lister, Hannah Howson-Wells, Jonathan Ball, Patrick McCure, Joseph Chappell, Theodoros Tselendis, Nadine Holmes, Matthew Carlisle, Christopher Moore, Fai Sang, Johnny Debebe, Victoria Wright, Matthew Loose                                                                                                                                                                                                                                                                                                         |
| EPI_ISL_529641, EPI_ISL_529642, EPI_ISL_529645                                                                                                 | University of Birmingham                                                                                                                                                                         | COVID-19 Genomics UK (COG-UK) Consortium                                                      | Institute of Microbiology, University of Birmingham, Claire McMurray, Joanne Stockton, Samuel Nicholas, Radoslaw Poplawski, Will Rowe, Josh Quirk, Nicholas Loman, University of Birmingham Testing Laboratory, Ceilina M Whalley, Andrew Bosworth, Charlotte Poxon, Kasun Wangasooriya, Oliver Pickles, Mike Kidd, Alex Richter, Andrew D Baggis PHE Headlands Lab, Husan Osman, Andrew Bosworth, Queen Elizabeth Hospital, Anna Casey                                                                                                                                                      |
| EPI_ISL_529686, EPI_ISL_529687                                                                                                                 | West of Scotland Specialist Virology Centre, NHSGGC / MRC-University of Glasgow Centre for Virus Research                                                                                        | COVID-19 Genomics UK (COG-UK) Consortium                                                      | Ana da Silva Filipe, Nataasha Johnson, Kathy Smollett, Daniel Mar, Stephen Carmichael, Lily Tong, Jenna Nichols, Elinu Aranday-Cortes, Kristyn Brunker, Yasmin Parr, Alice Broos, Kyriaki Nomiku, Sarah McDonald, Marc Nebel, Patavase Assampan, Richard Orton, Joseph Hughes, Steenu Vaitipally, David L. Robertson, Alastair MacLean, Rory Gunson, Katy LI, Natasha Jesudasan, Rajiv Shah, James Shepherd, Antonia Ho, Alice Broos, Emma Thomson                                                                                                                                           |
| EPI_ISL_530361                                                                                                                                 | NHSGGC West of Scotland Specialist Virology Centre / MRC-University of Glasgow Centre for Virus Research                                                                                         | Wellcome Sanger Institute for the COVID-19 Genomics UK (COG-UK) consortium                    | Ana da Silva Filipe, Nataasha Johnson, Kathy Smollett, Daniel Mar, Stephen Carmichael, Lily Tong, Jenna Nichols, Elinu Aranday-Cortes, Kristyn Brunker, Yasmin Parr, Kyriaki Nomiku, Sarah McDonald, Marc Nebel, Patavase Assampan, Richard Orton, Joseph Hughes, Steenu Vaitipally, David L. Robertson, Alastair MacLean, Rory Gunson, Katy LI, Natasha Jesudasan, Rajiv Shah, James Shepherd, Antonia Ho, Alice Broos, Emma Thomson and Alex Alderton, Roberto Amato, Sonia Goncalves, Ewan Harrison, David K. Jackson, Ian Johnston, Dominic Kwiatkowski, Cordelia Langford, John Sillito |
| EPI_ISL_530362                                                                                                                                 | Lighthouse Lab in Glasgow                                                                                                                                                                        | Wellcome Sanger Institute for the COVID-19 Genomics UK (COG-UK) consortium                    | Harper VanSteenhouse, Yurni Kasai, David Gray, Carol Clugston, Anna Dominiczak and Alex Alderton, Roberto Amato, Sonia Goncalves, Ewan Harrison, David K. Jackson, Ian Johnston, Dominic Kwiatkowski, Cordelia Langford, John Sillito                                                                                                                                                                                                                                                                                                                                                        |
| EPI_ISL_530666, EPI_ISL_530377                                                                                                                 | NHSGGC West of Scotland Specialist Virology Centre / MRC-University of Glasgow Centre for Virus Research                                                                                         | Wellcome Sanger Institute for the COVID-19 Genomics UK (COG-UK) consortium                    | Ana da Silva Filipe, Nataasha Johnson, Kathy Smollett, Daniel Mar, Stephen Carmichael, Lily Tong, Jenna Nichols, Elinu Aranday-Cortes, Kristyn Brunker, Yasmin Parr, Kyriaki Nomiku, Sarah McDonald, Marc Nebel, Patavase Assampan, Richard Orton, Joseph Hughes, Steenu Vaitipally, David L. Robertson, Alastair MacLean, Rory Gunson, Katy LI, Natasha Jesudasan, Rajiv Shah, James Shepherd, Antonia Ho, Alice Broos, Emma Thomson and Alex Alderton, Roberto Amato, Sonia Goncalves, Ewan Harrison, David K. Jackson, Ian Johnston, Dominic Kwiatkowski, Cordelia Langford, John Sillito |
| EPI_ISL_530385                                                                                                                                 | Lighthouse Lab in Glasgow                                                                                                                                                                        | Wellcome Sanger Institute for the COVID-19 Genomics UK (COG-UK) consortium                    | Harper VanSteenhouse, Yurni Kasai, David Gray, Carol Clugston, Anna Dominiczak and Alex Alderton, Roberto Amato, Sonia Goncalves, Ewan Harrison, David K. Jackson, Ian Johnston, Dominic Kwiatkowski, Cordelia Langford, John Sillito                                                                                                                                                                                                                                                                                                                                                        |
| EPI_ISL_530386, EPI_ISL_530388, EPI_ISL_530398                                                                                                 | NHSGGC West of Scotland Specialist Virology Centre / MRC-University of Glasgow Centre for Virus Research                                                                                         | Wellcome Sanger Institute for the COVID-19 Genomics UK (COG-UK) consortium                    | Ana da Silva Filipe, Nataasha Johnson, Kathy Smollett, Daniel Mar, Stephen Carmichael, Lily Tong, Jenna Nichols, Elinu Aranday-Cortes, Kristyn Brunker, Yasmin Parr, Kyriaki Nomiku, Sarah McDonald, Marc Nebel, Patavase Assampan, Richard Orton, Joseph Hughes, Steenu Vaitipally, David L. Robertson, Alastair MacLean, Rory Gunson, Katy LI, Natasha Jesudasan, Rajiv Shah, James Shepherd, Antonia Ho, Alice Broos, Emma Thomson and Alex Alderton, Roberto Amato, Sonia Goncalves, Ewan Harrison, David K. Jackson, Ian Johnston, Dominic Kwiatkowski, Cordelia Langford, John Sillito |
| EPI_ISL_530429                                                                                                                                 | Lighthouse Lab in Glasgow                                                                                                                                                                        | Wellcome Sanger Institute for the COVID-19 Genomics UK (COG-UK) consortium                    | Harper VanSteenhouse, Yurni Kasai, David Gray, Carol Clugston, Anna Dominiczak and Alex Alderton, Roberto Amato, Sonia Goncalves, Ewan Harrison, David K. Jackson, Ian Johnston, Dominic Kwiatkowski, Cordelia Langford, John Sillito                                                                                                                                                                                                                                                                                                                                                        |
| EPI_ISL_530431                                                                                                                                 | Lighthouse Lab in Glasgow                                                                                                                                                                        | Wellcome Sanger Institute for the COVID-19 Genomics UK (COG-UK) consortium                    | Harper VanSteenhouse, Yurni Kasai, David Gray, Carol Clugston, Anna Dominiczak and Alex Alderton, Roberto Amato, Sonia Goncalves, Ewan Harrison, David K. Jackson, Ian Johnston, Dominic Kwiatkowski, Cordelia Langford, John Sillito                                                                                                                                                                                                                                                                                                                                                        |
| EPI_ISL_530440                                                                                                                                 | NHSGGC West of Scotland Specialist Virology Centre / MRC-University of Glasgow Centre for Virus Research                                                                                         | Wellcome Sanger Institute for the COVID-19 Genomics UK (COG-UK) consortium                    | Ana da Silva Filipe, Nataasha Johnson, Kathy Smollett, Daniel Mar, Stephen Carmichael, Lily Tong, Jenna Nichols, Elinu Aranday-Cortes, Kristyn Brunker, Yasmin Parr, Kyriaki Nomiku, Sarah McDonald, Marc Nebel, Patavase Assampan, Richard Orton, Joseph Hughes, Steenu Vaitipally, David L. Robertson, Alastair MacLean, Rory Gunson, Katy LI, Natasha Jesudasan, Rajiv Shah, James Shepherd, Antonia Ho, Alice Broos, Emma Thomson and Alex Alderton, Roberto Amato, Sonia Goncalves, Ewan Harrison, David K. Jackson, Ian Johnston, Dominic Kwiatkowski, Cordelia Langford, John Sillito |
| EPI_ISL_530473                                                                                                                                 | Lighthouse Lab in Glasgow                                                                                                                                                                        | Wellcome Sanger Institute for the COVID-19 Genomics UK (COG-UK) consortium                    | Harper VanSteenhouse, Yurni Kasai, David Gray, Carol Clugston, Anna Dominiczak and Alex Alderton, Roberto Amato, Sonia Goncalves, Ewan Harrison, David K. Jackson, Ian Johnston, Dominic Kwiatkowski, Cordelia Langford, John Sillito                                                                                                                                                                                                                                                                                                                                                        |
| EPI_ISL_530489                                                                                                                                 | NHSGGC West of Scotland Specialist Virology Centre / MRC-University of Glasgow Centre for Virus Research                                                                                         | Wellcome Sanger Institute for the COVID-19 Genomics UK (COG-UK) consortium                    | Ana da Silva Filipe, Nataasha Johnson, Kathy Smollett, Daniel Mar, Stephen Carmichael, Lily Tong, Jenna Nichols, Elinu Aranday-Cortes, Kristyn Brunker, Yasmin Parr, Kyriaki Nomiku, Sarah McDonald, Marc Nebel, Patavase Assampan, Richard Orton, Joseph Hughes, Steenu Vaitipally, David L. Robertson, Alastair MacLean, Rory Gunson, Katy LI, Natasha Jesudasan, Rajiv Shah, James Shepherd, Antonia Ho, Alice Broos, Emma Thomson and Alex Alderton, Roberto Amato, Sonia Goncalves, Ewan Harrison, David K. Jackson, Ian Johnston, Dominic Kwiatkowski, Cordelia Langford, John Sillito |
| EPI_ISL_530608, EPI_ISL_530519                                                                                                                 | Lighthouse Lab in Glasgow                                                                                                                                                                        | Wellcome Sanger Institute for the COVID-19 Genomics UK (COG-UK) consortium                    | Harper VanSteenhouse, Yurni Kasai, David Gray, Carol Clugston, Anna Dominiczak and Alex Alderton, Roberto Amato, Sonia Goncalves, Ewan Harrison, David K. Jackson, Ian Johnston, Dominic Kwiatkowski, Cordelia Langford, John Sillito                                                                                                                                                                                                                                                                                                                                                        |

national COVID-19 response team.









|                                                                                                                                                                                                                                                                                                                                                                                                                                                                                                                                                                                                                                                                                                                                                                                                                                                                                                                |                                                                                                                            |                                                                                                                                                                                                                                |                                                                                                                             |  |  |  |                                                                                               |                                                                                                                                                                                                                                                                                                                                                                                                                                                                                                                                                                                                        |  |
|----------------------------------------------------------------------------------------------------------------------------------------------------------------------------------------------------------------------------------------------------------------------------------------------------------------------------------------------------------------------------------------------------------------------------------------------------------------------------------------------------------------------------------------------------------------------------------------------------------------------------------------------------------------------------------------------------------------------------------------------------------------------------------------------------------------------------------------------------------------------------------------------------------------|----------------------------------------------------------------------------------------------------------------------------|--------------------------------------------------------------------------------------------------------------------------------------------------------------------------------------------------------------------------------|-----------------------------------------------------------------------------------------------------------------------------|--|--|--|-----------------------------------------------------------------------------------------------|--------------------------------------------------------------------------------------------------------------------------------------------------------------------------------------------------------------------------------------------------------------------------------------------------------------------------------------------------------------------------------------------------------------------------------------------------------------------------------------------------------------------------------------------------------------------------------------------------------|--|
| EPI_ISL_541015, EPI_ISL_541016                                                                                                                                                                                                                                                                                                                                                                                                                                                                                                                                                                                                                                                                                                                                                                                                                                                                                 |                                                                                                                            |                                                                                                                                                                                                                                |                                                                                                                             |  |  |  |                                                                                               |                                                                                                                                                                                                                                                                                                                                                                                                                                                                                                                                                                                                        |  |
| EPI_ISL_541017, EPI_ISL_541018                                                                                                                                                                                                                                                                                                                                                                                                                                                                                                                                                                                                                                                                                                                                                                                                                                                                                 |                                                                                                                            |                                                                                                                                                                                                                                |                                                                                                                             |  |  |  |                                                                                               |                                                                                                                                                                                                                                                                                                                                                                                                                                                                                                                                                                                                        |  |
| EPI_ISL_541019                                                                                                                                                                                                                                                                                                                                                                                                                                                                                                                                                                                                                                                                                                                                                                                                                                                                                                 |                                                                                                                            |                                                                                                                                                                                                                                |                                                                                                                             |  |  |  |                                                                                               |                                                                                                                                                                                                                                                                                                                                                                                                                                                                                                                                                                                                        |  |
| EPI_ISL_541078, EPI_ISL_541079                                                                                                                                                                                                                                                                                                                                                                                                                                                                                                                                                                                                                                                                                                                                                                                                                                                                                 | Hospital de la Santa Creu i Sant Pau. Servicio de Microbiología                                                            | SeqCOVID-SPAIN consortium/Institute of Biomedicine of Valencia, IBV-CSIC                                                                                                                                                       |                                                                                                                             |  |  |  |                                                                                               | Ferran Navarro, Nuria Rabadella, Elisenda Miró and SeqCOVID-SPAIN consortium                                                                                                                                                                                                                                                                                                                                                                                                                                                                                                                           |  |
| EPI_ISL_541081                                                                                                                                                                                                                                                                                                                                                                                                                                                                                                                                                                                                                                                                                                                                                                                                                                                                                                 |                                                                                                                            |                                                                                                                                                                                                                                |                                                                                                                             |  |  |  |                                                                                               |                                                                                                                                                                                                                                                                                                                                                                                                                                                                                                                                                                                                        |  |
| EPI_ISL_541083, EPI_ISL_541084, EPI_ISL_541085, EPI_ISL_541086, EPI_ISL_541087, EPI_ISL_541088, EPI_ISL_541089, EPI_ISL_541090, EPI_ISL_541091, EPI_ISL_541092, EPI_ISL_541093, EPI_ISL_541094, EPI_ISL_541095, EPI_ISL_541096, EPI_ISL_541097, EPI_ISL_541098, EPI_ISL_541099, EPI_ISL_541100, EPI_ISL_541101, EPI_ISL_541102, EPI_ISL_541103, EPI_ISL_541104, EPI_ISL_541105, EPI_ISL_541106, EPI_ISL_541107, EPI_ISL_541108, EPI_ISL_541109, EPI_ISL_541110, EPI_ISL_541111, EPI_ISL_541112, EPI_ISL_541113, EPI_ISL_541114, EPI_ISL_541115, EPI_ISL_541116, EPI_ISL_541117, EPI_ISL_541118, EPI_ISL_541119, EPI_ISL_541120, EPI_ISL_541121, EPI_ISL_541122, EPI_ISL_541123, EPI_ISL_541124, EPI_ISL_541125, EPI_ISL_541126, EPI_ISL_541127, EPI_ISL_541128, EPI_ISL_541129, EPI_ISL_541130, EPI_ISL_541131, EPI_ISL_541132, EPI_ISL_541133, EPI_ISL_541134, EPI_ISL_541135, EPI_ISL_541136, EPI_ISL_541137 | see above                                                                                                                  | Servicio de Microbiología, Hospital Universitario Donostia, OSI Donostialdea, Área de Enfermedades Infecciosas, Grupo de Infección Respiratoria y Resistencia Antimicrobiana, Instituto de Investigación Sanitaria Biodonostia | SeqCOVID-SPAIN consortium/Institute of Biomedicine of Valencia, IBV-CSIC                                                    |  |  |  | Gustavo Cilla, Milagrosa Montes, Luis Prieto, Jose Maria Marmon and SeqCOVID-SPAIN consortium |                                                                                                                                                                                                                                                                                                                                                                                                                                                                                                                                                                                                        |  |
| EPI_ISL_541401, EPI_ISL_541403, EPI_ISL_541404, EPI_ISL_541409, EPI_ISL_541430, EPI_ISL_541466, EPI_ISL_541467, EPI_ISL_541471, EPI_ISL_541499, EPI_ISL_541503, EPI_ISL_541506, EPI_ISL_541508, EPI_ISL_541511, EPI_ISL_541517, EPI_ISL_541535, EPI_ISL_541536                                                                                                                                                                                                                                                                                                                                                                                                                                                                                                                                                                                                                                                 | see above                                                                                                                  | Vollier AG                                                                                                                                                                                                                     | Department of Biosystems Science and Engineering ETH Zürich                                                                 |  |  |  |                                                                                               | Christian Baisel, Sarai Nadeau, Ivan Topilsky, Pedro Ferreira, Philipp Jablonksi, Susana Posada-Céspedes, Tobias Schär, Ina Nissen, Natascia Santaroco, Elodie Burcklen, Christiane Beckmann, Maurice Beckmann, Olivier Kobel, Christoph Koppen, Sophie Seidel, Noemie Santamaria de Souza, Niko Beerewinkel, Tanja Stalder                                                                                                                                                                                                                                                                            |  |
| EPI_ISL_541793, EPI_ISL_541804                                                                                                                                                                                                                                                                                                                                                                                                                                                                                                                                                                                                                                                                                                                                                                                                                                                                                 | Lighthouse Lab in Glasgow                                                                                                  | Wellcome Sanger Institute for the COVID-19 Genomics UK (COG-UK) consortium                                                                                                                                                     |                                                                                                                             |  |  |  |                                                                                               | Harper VansSteenhuse, Yurni Kasai, David Gray, Carol Clugston, Anna Dominiczak and Alex Alderton, Roberto Amato, Sonia Goncalves, Ewan Harrison, David K. Jackson, Ian Johnston, Dominic Kwiatkowski, Cordelia Langford, John Sillitoe on behalf of the Wellcome Sanger Institute COVID-19 Surveillance Team                                                                                                                                                                                                                                                                                           |  |
| EPI_ISL_541818, EPI_ISL_541820, EPI_ISL_541824, EPI_ISL_541825, EPI_ISL_541838, EPI_ISL_541839, EPI_ISL_541842, EPI_ISL_541845                                                                                                                                                                                                                                                                                                                                                                                                                                                                                                                                                                                                                                                                                                                                                                                 | Lighthouse Lab in Glasgow                                                                                                  | Wellcome Sanger Institute for the COVID-19 Genomics UK (COG-UK) consortium                                                                                                                                                     |                                                                                                                             |  |  |  |                                                                                               | Harper VansSteenhuse, Yurni Kasai, David Gray, Carol Clugston, Anna Dominiczak and Alex Alderton, Roberto Amato, Sonia Goncalves, Ewan Harrison, David K. Jackson, Ian Johnston, Dominic Kwiatkowski, Cordelia Langford, John Sillitoe on behalf of the Wellcome Sanger Institute COVID-19 Surveillance Team                                                                                                                                                                                                                                                                                           |  |
| EPI_ISL_541887, EPI_ISL_541890, EPI_ISL_541898, EPI_ISL_541900, EPI_ISL_541901, EPI_ISL_541902, EPI_ISL_541904, EPI_ISL_541905, EPI_ISL_541906, EPI_ISL_541907, EPI_ISL_541908, EPI_ISL_541909, EPI_ISL_541910, EPI_ISL_541913, EPI_ISL_541915, EPI_ISL_541916, EPI_ISL_541917, EPI_ISL_541918, EPI_ISL_541920, EPI_ISL_541923, EPI_ISL_541924, EPI_ISL_541926, EPI_ISL_541928, EPI_ISL_541930, EPI_ISL_541932, EPI_ISL_541934, EPI_ISL_541936, EPI_ISL_541937, EPI_ISL_541940                                                                                                                                                                                                                                                                                                                                                                                                                                 | see above                                                                                                                  | Hospital General Universitario Gregorio Marañón<br>Department of Pathology, University of Cambridge<br>Department of Pathology, University of Oxford, Oxford University Hospitals, Basingshoke and North Hampshire Hospital    | SeqCOVID-SPAIN consortium/IBV(CSIC)<br>COVID-19 Genomics UK (COG-UK) Consortium<br>COVID-19 Genomics UK (COG-UK) Consortium |  |  |  |                                                                                               | Laura Perez-Lago, Marta Herranz, Jon Stella, Julia Suárez, Pilar Catalan, Patricia Muñoz, Dario Garcia de Viedma and SeqCOVID-SPAIN consortium<br>Aminu S. Jalun, Yasmin Chaudhry, Grant Hall, Iliana Georgiana, Myra Hosmillo, Martin D. Curran, Malte Plockert, Susendra Parmar, Ian Goodfellow<br>Tanya Goldzchik, David Bonseal, George Machnyre, Amy Treps, Mariteresa de Cesara, Cairn Moore, Alex Mobbs, Anita Justice, Robert Shaw, Monique Andersson, Timothy Peio, Emma Wise, Nathan Moore, Jessica Lynch, Nick Cortes, Matilde Mori, Stephen Kidd, David Buck, John Todd, Christophe Fraser |  |
| EPI_ISL_549386                                                                                                                                                                                                                                                                                                                                                                                                                                                                                                                                                                                                                                                                                                                                                                                                                                                                                                 | Centre for Enzyme Innovation, University of Portsmouth / Translational Research Laboratory, Portsmouth Hospitals NHS Trust | COVID-19 Genomics UK (COG-UK) Consortium                                                                                                                                                                                       |                                                                                                                             |  |  |  |                                                                                               | Angela Beckett, Yann Bourgeois, Garry Scarlett, Sharon Glaysher, Scott Elliott, Kelly Bicknell, Robert Impy, Alysson Lloyd, Sarai Wylie, Ethan Butcher, Anoop Chauhan, Samuel Robson                                                                                                                                                                                                                                                                                                                                                                                                                   |  |
| EPI_ISL_549491, EPI_ISL_549513                                                                                                                                                                                                                                                                                                                                                                                                                                                                                                                                                                                                                                                                                                                                                                                                                                                                                 | Queens Medical Centre, Clinical Microbiology Department / DeepSeq Nottingham                                               | COVID-19 Genomics UK (COG-UK) Consortium                                                                                                                                                                                       |                                                                                                                             |  |  |  |                                                                                               | Germa Clark, Wendy Smith, Manjinder Khakh, Vicki M Fleming, Michéle M Lister, Hannah Howson-Wells, Jonathan Ball, Patrick McCuire, Joseph Chappell, Theodoras Tsoleridis, Nadine Holmes, Matthew Carlisle, Christopher Moore, Fei Sang, Johnny Debele, Victoria Wright, Matthew Loose                                                                                                                                                                                                                                                                                                                  |  |
| EPI_ISL_549827, EPI_ISL_549831, EPI_ISL_549832, EPI_ISL_549834, EPI_ISL_549839                                                                                                                                                                                                                                                                                                                                                                                                                                                                                                                                                                                                                                                                                                                                                                                                                                 | Oxford Viromics, NDM, University of Oxford, Oxford University Hospitals, Basingshoke and North Hampshire Hospital          | COVID-19 Genomics UK (COG-UK) Consortium                                                                                                                                                                                       |                                                                                                                             |  |  |  |                                                                                               | Tanya Goldzchik, David Bonseal, George Machnyre, Amy Treps, Mariteresa de Cesara, Cairn Moore, Alex Mobbs, Anita Justice, Robert Shaw, Monique Andersson, Timothy Peio, Emma Wise, Nathan Moore, Jessica Lynch, Nick Cortes, Matilde Mori, Stephen Kidd, David Buck, John Todd, Christophe Fraser                                                                                                                                                                                                                                                                                                      |  |
| EPI_ISL_549552, EPI_ISL_549554, EPI_ISL_549571, EPI_ISL_549581, EPI_ISL_549586, EPI_ISL_549587, EPI_ISL_549588, EPI_ISL_549598, EPI_ISL_549610, EPI_ISL_549626, EPI_ISL_549632, EPI_ISL_549633, EPI_ISL_549639, EPI_ISL_549642, EPI_ISL_549646, EPI_ISL_549649, EPI_ISL_549682, EPI_ISL_549683, EPI_ISL_549684, EPI_ISL_549685, EPI_ISL_549686, EPI_ISL_549687, EPI_ISL_549677, EPI_ISL_549678, EPI_ISL_549681, EPI_ISL_549702, EPI_ISL_549716, EPI_ISL_549725, EPI_ISL_549753, EPI_ISL_549754, EPI_ISL_549760, EPI_ISL_549765, EPI_ISL_549768, EPI_ISL_549769                                                                                                                                                                                                                                                                                                                                                 | see above                                                                                                                  | Wellcome Sanger Institute for the COVID-19 Genomics UK (COG-UK) consortium                                                                                                                                                     |                                                                                                                             |  |  |  |                                                                                               | Harper VansSteenhuse, Yurni Kasai, David Gray, Carol Clugston, Anna Dominiczak and Alex Alderton, Roberto Amato, Sonia Goncalves, Ewan Harrison, David K. Jackson, Ian Johnston, Dominic Kwiatkowski, Cordelia Langford, John Sillitoe on behalf of the Wellcome Sanger Institute COVID-19 Surveillance Team                                                                                                                                                                                                                                                                                           |  |
| EPI_ISL_549775, EPI_ISL_549797                                                                                                                                                                                                                                                                                                                                                                                                                                                                                                                                                                                                                                                                                                                                                                                                                                                                                 | Lighthouse Lab in Glasgow                                                                                                  | Wellcome Sanger Institute for the COVID-19 Genomics UK (COG-UK) Consortium                                                                                                                                                     |                                                                                                                             |  |  |  |                                                                                               | Harper VansSteenhuse, Yurni Kasai, David Gray, Carol Clugston, Anna Dominiczak and Alex Alderton, Roberto Amato, Sonia Goncalves, Ewan Harrison, David K. Jackson, Ian Johnston, Dominic Kwiatkowski, Cordelia Langford, John Sillitoe on behalf of the Wellcome Sanger Institute COVID-19 Surveillance Team                                                                                                                                                                                                                                                                                           |  |
| EPI_ISL_549825, EPI_ISL_549826, EPI_ISL_549828, EPI_ISL_549837, EPI_ISL_549843, EPI_ISL_549851, EPI_ISL_549857, EPI_ISL_549882, EPI_ISL_549884, EPI_ISL_549886, EPI_ISL_549887, EPI_ISL_549894, EPI_ISL_549895, EPI_ISL_549903, EPI_ISL_549904, EPI_ISL_549905, EPI_ISL_549936                                                                                                                                                                                                                                                                                                                                                                                                                                                                                                                                                                                                                                 | see above                                                                                                                  | Wellcome Sanger Institute for the COVID-19 Genomics UK (COG-UK) consortium                                                                                                                                                     |                                                                                                                             |  |  |  |                                                                                               | Harper VansSteenhuse, Yurni Kasai, David Gray, Carol Clugston, Anna Dominiczak and Alex Alderton, Roberto Amato, Sonia Goncalves, Ewan Harrison, David K. Jackson, Ian Johnston, Dominic Kwiatkowski, Cordelia Langford, John Sillitoe on behalf of the Wellcome Sanger Institute COVID-19 Surveillance Team                                                                                                                                                                                                                                                                                           |  |
| EPI_ISL_549940                                                                                                                                                                                                                                                                                                                                                                                                                                                                                                                                                                                                                                                                                                                                                                                                                                                                                                 | Lighthouse Lab in Milton Keynes                                                                                            | Wellcome Sanger Institute for the COVID-19 Genomics UK (COG-UK) consortium                                                                                                                                                     |                                                                                                                             |  |  |  |                                                                                               | The Lighthouse Lab in Alderley Park and Alex Alderton, Roberto Amato, Sonia Goncalves, Ewan Harrison, David K. Jackson, Ian Johnston, Dominic Kwiatkowski, Cordelia Langford, John Sillitoe on behalf of the Wellcome Sanger Institute COVID-19 Surveillance Team<br>(http://www.sanger.ac.uk/covid-team)                                                                                                                                                                                                                                                                                              |  |
| EPI_ISL_549978, EPI_ISL_549983, EPI_ISL_549985, EPI_ISL_549987, EPI_ISL_549997, EPI_ISL_550007                                                                                                                                                                                                                                                                                                                                                                                                                                                                                                                                                                                                                                                                                                                                                                                                                 | Lighthouse Lab in Milton Keynes                                                                                            | Wellcome Sanger Institute for the COVID-19 Genomics UK (COG-UK) consortium                                                                                                                                                     |                                                                                                                             |  |  |  |                                                                                               | The Lighthouse Lab in Milton Keynes and Alex Alderton, Roberto Amato, Sonia Goncalves, Ewan Harrison, David K. Jackson, Ian Johnston, Dominic Kwiatkowski, Cordelia Langford, John Sillitoe on behalf of the Wellcome Sanger Institute COVID-19 Surveillance Team<br>(http://www.sanger.ac.uk/covid-team)                                                                                                                                                                                                                                                                                              |  |
| EPI_ISL_550017                                                                                                                                                                                                                                                                                                                                                                                                                                                                                                                                                                                                                                                                                                                                                                                                                                                                                                 | Lighthouse Lab in Milton Keynes                                                                                            | Wellcome Sanger Institute for the COVID-19 Genomics UK (COG-UK) consortium                                                                                                                                                     |                                                                                                                             |  |  |  |                                                                                               | The Lighthouse Lab in Alderley Park and Alex Alderton, Roberto Amato, Sonia Goncalves, Ewan Harrison, David K. Jackson, Ian Johnston, Dominic Kwiatkowski, Cordelia Langford, John Sillitoe on behalf of the Wellcome Sanger Institute COVID-19 Surveillance Team<br>(http://www.sanger.ac.uk/covid-team)                                                                                                                                                                                                                                                                                              |  |
| EPI_ISL_550020, EPI_ISL_550025, EPI_ISL_550028                                                                                                                                                                                                                                                                                                                                                                                                                                                                                                                                                                                                                                                                                                                                                                                                                                                                 | Lighthouse Lab in Milton Keynes                                                                                            | Wellcome Sanger Institute for the COVID-19 Genomics UK (COG-UK) consortium                                                                                                                                                     |                                                                                                                             |  |  |  |                                                                                               | The Lighthouse Lab in Alderley Park and Alex Alderton, Roberto Amato, Sonia Goncalves, Ewan Harrison, David K. Jackson, Ian Johnston, Dominic Kwiatkowski, Cordelia Langford, John Sillitoe on behalf of the Wellcome Sanger Institute COVID-19 Surveillance Team<br>(http://www.sanger.ac.uk/covid-team)                                                                                                                                                                                                                                                                                              |  |
| EPI_ISL_550030                                                                                                                                                                                                                                                                                                                                                                                                                                                                                                                                                                                                                                                                                                                                                                                                                                                                                                 | Lighthouse Lab in Milton Keynes                                                                                            | Wellcome Sanger Institute for the COVID-19 Genomics UK (COG-UK) consortium                                                                                                                                                     |                                                                                                                             |  |  |  |                                                                                               | The Lighthouse Lab in Alderley Park and Alex Alderton, Roberto Amato, Sonia Goncalves, Ewan Harrison, David K. Jackson, Ian Johnston, Dominic Kwiatkowski, Cordelia Langford, John Sillitoe on behalf of the Wellcome Sanger Institute COVID-19 Surveillance Team<br>(http://www.sanger.ac.uk/covid-team)                                                                                                                                                                                                                                                                                              |  |
| EPI_ISL_550033                                                                                                                                                                                                                                                                                                                                                                                                                                                                                                                                                                                                                                                                                                                                                                                                                                                                                                 | Lighthouse Lab in Milton Keynes                                                                                            | Wellcome Sanger Institute for the COVID-19 Genomics UK (COG-UK) consortium                                                                                                                                                     |                                                                                                                             |  |  |  |                                                                                               | The Lighthouse Lab in Milton Keynes and Alex Alderton, Roberto Amato, Sonia Goncalves, Ewan Harrison, David K. Jackson, Ian Johnston, Dominic Kwiatkowski, Cordelia Langford, John Sillitoe on behalf of the Wellcome Sanger Institute COVID-19 Surveillance Team<br>(http://www.sanger.ac.uk/covid-team)                                                                                                                                                                                                                                                                                              |  |
| EPI_ISL_550036                                                                                                                                                                                                                                                                                                                                                                                                                                                                                                                                                                                                                                                                                                                                                                                                                                                                                                 | Lighthouse Lab in Milton Keynes                                                                                            | Wellcome Sanger Institute for the COVID-19 Genomics UK (COG-UK) consortium                                                                                                                                                     |                                                                                                                             |  |  |  |                                                                                               | The Lighthouse Lab in Alderley Park and Alex Alderton, Roberto Amato, Sonia Goncalves, Ewan Harrison, David K. Jackson, Ian Johnston, Dominic Kwiatkowski, Cordelia Langford, John Sillitoe on behalf of the Wellcome Sanger Institute COVID-19 Surveillance Team<br>(http://www.sanger.ac.uk/covid-team)                                                                                                                                                                                                                                                                                              |  |
| EPI_ISL_550043, EPI_ISL_550052, EPI_ISL_550069                                                                                                                                                                                                                                                                                                                                                                                                                                                                                                                                                                                                                                                                                                                                                                                                                                                                 | Lighthouse Lab in Milton Keynes                                                                                            | Wellcome Sanger Institute for the COVID-19 Genomics UK (COG-UK) consortium                                                                                                                                                     |                                                                                                                             |  |  |  |                                                                                               | The Lighthouse Lab in Milton Keynes and Alex Alderton, Roberto Amato, Sonia Goncalves, Ewan Harrison, David K. Jackson, Ian Johnston, Dominic Kwiatkowski, Cordelia Langford, John Sillitoe on behalf of the Wellcome Sanger Institute COVID-19 Surveillance Team<br>(http://www.sanger.ac.uk/covid-team)                                                                                                                                                                                                                                                                                              |  |









|                                                                                                                                                                                                                                                                                                                                                                                                                                                                                                                                                                                                                                                                                                                                                                                                                                                                                                                                                                                                                                                                                                                                                                                                                                                                                                                                                                                                                                                                                                                                                                                                                                                                                                                                                                                                                                                                                                                                                                                                                                                                                                                                                                                                                                                                                                                                                                                                                                                                                                                                                                                                                                                                                                                                                                                                                                                                                                                                                                                                                                                                                                                                                                                                                                                                                                                                                                                                                                                                                                                                                                                                                |           |                                                                                                                                                                                                 |                                                                                    |                                                                                                                                                                                                                                                                                                                                                                                                                                                                                                                                                                                                                                                                                        |
|----------------------------------------------------------------------------------------------------------------------------------------------------------------------------------------------------------------------------------------------------------------------------------------------------------------------------------------------------------------------------------------------------------------------------------------------------------------------------------------------------------------------------------------------------------------------------------------------------------------------------------------------------------------------------------------------------------------------------------------------------------------------------------------------------------------------------------------------------------------------------------------------------------------------------------------------------------------------------------------------------------------------------------------------------------------------------------------------------------------------------------------------------------------------------------------------------------------------------------------------------------------------------------------------------------------------------------------------------------------------------------------------------------------------------------------------------------------------------------------------------------------------------------------------------------------------------------------------------------------------------------------------------------------------------------------------------------------------------------------------------------------------------------------------------------------------------------------------------------------------------------------------------------------------------------------------------------------------------------------------------------------------------------------------------------------------------------------------------------------------------------------------------------------------------------------------------------------------------------------------------------------------------------------------------------------------------------------------------------------------------------------------------------------------------------------------------------------------------------------------------------------------------------------------------------------------------------------------------------------------------------------------------------------------------------------------------------------------------------------------------------------------------------------------------------------------------------------------------------------------------------------------------------------------------------------------------------------------------------------------------------------------------------------------------------------------------------------------------------------------------------------------------------------------------------------------------------------------------------------------------------------------------------------------------------------------------------------------------------------------------------------------------------------------------------------------------------------------------------------------------------------------------------------------------------------------------------------------------------------|-----------|-------------------------------------------------------------------------------------------------------------------------------------------------------------------------------------------------|------------------------------------------------------------------------------------|----------------------------------------------------------------------------------------------------------------------------------------------------------------------------------------------------------------------------------------------------------------------------------------------------------------------------------------------------------------------------------------------------------------------------------------------------------------------------------------------------------------------------------------------------------------------------------------------------------------------------------------------------------------------------------------|
| EP1_ISL_568225, EP1_ISL_568226, EP1_ISL_568230, EP1_ISL_568232, EP1_ISL_568233, EP1_ISL_568234, EP1_ISL_568236, EP1_ISL_568237, EP1_ISL_568238, EP1_ISL_568239, EP1_ISL_568240, EP1_ISL_568241, EP1_ISL_568242, EP1_ISL_568243, EP1_ISL_568244, EP1_ISL_568246, EP1_ISL_568249, EP1_ISL_568250, EP1_ISL_568251, EP1_ISL_568252, EP1_ISL_568253, EP1_ISL_568254, EP1_ISL_568255, EP1_ISL_568257, EP1_ISL_568260, EP1_ISL_568262, EP1_ISL_568263, EP1_ISL_568266, EP1_ISL_568268, EP1_ISL_568270, EP1_ISL_568271, EP1_ISL_568272, EP1_ISL_568273, EP1_ISL_568274, EP1_ISL_568275, EP1_ISL_568276, EP1_ISL_568277, EP1_ISL_568278, EP1_ISL_568282, EP1_ISL_568283, EP1_ISL_568284, EP1_ISL_568285, EP1_ISL_568286, EP1_ISL_568287, EP1_ISL_568288, EP1_ISL_568289, EP1_ISL_568290, EP1_ISL_568291, EP1_ISL_568292, EP1_ISL_568293, EP1_ISL_568294, EP1_ISL_568295, EP1_ISL_568296, EP1_ISL_568297, EP1_ISL_568298, EP1_ISL_568299, EP1_ISL_568300, EP1_ISL_568301, EP1_ISL_568302, EP1_ISL_568303, EP1_ISL_568304, EP1_ISL_568305, EP1_ISL_568306, EP1_ISL_568307, EP1_ISL_568308, EP1_ISL_568309, EP1_ISL_568310, EP1_ISL_568311, EP1_ISL_568312, EP1_ISL_568313, EP1_ISL_568314, EP1_ISL_568315, EP1_ISL_568316, EP1_ISL_568317, EP1_ISL_568318, EP1_ISL_568319, EP1_ISL_568320, EP1_ISL_568321, EP1_ISL_568322, EP1_ISL_568323, EP1_ISL_568324, EP1_ISL_568325, EP1_ISL_568326, EP1_ISL_568327, EP1_ISL_568328, EP1_ISL_568329, EP1_ISL_568330, EP1_ISL_568331, EP1_ISL_568332, EP1_ISL_568333, EP1_ISL_568334, EP1_ISL_568335, EP1_ISL_568336, EP1_ISL_568337, EP1_ISL_568338, EP1_ISL_568339, EP1_ISL_568340, EP1_ISL_568341, EP1_ISL_568342, EP1_ISL_568343, EP1_ISL_568344, EP1_ISL_568345, EP1_ISL_568346, EP1_ISL_568347, EP1_ISL_568348, EP1_ISL_568349, EP1_ISL_568350, EP1_ISL_568351, EP1_ISL_568352, EP1_ISL_568353, EP1_ISL_568354, EP1_ISL_568355, EP1_ISL_568356, EP1_ISL_568357, EP1_ISL_568358, EP1_ISL_568359, EP1_ISL_568360, EP1_ISL_568361, EP1_ISL_568362, EP1_ISL_568363, EP1_ISL_568364, EP1_ISL_568365, EP1_ISL_568366, EP1_ISL_568367, EP1_ISL_568368, EP1_ISL_568369, EP1_ISL_568370, EP1_ISL_568371, EP1_ISL_568372, EP1_ISL_568373, EP1_ISL_568374, EP1_ISL_568375, EP1_ISL_568376, EP1_ISL_568377, EP1_ISL_568378, EP1_ISL_568379, EP1_ISL_568380, EP1_ISL_568381, EP1_ISL_568382, EP1_ISL_568383, EP1_ISL_568384, EP1_ISL_568385, EP1_ISL_568386, EP1_ISL_568387, EP1_ISL_568388, EP1_ISL_568389, EP1_ISL_568390, EP1_ISL_568391, EP1_ISL_568392, EP1_ISL_568393, EP1_ISL_568394, EP1_ISL_568395, EP1_ISL_568396, EP1_ISL_568397, EP1_ISL_568398, EP1_ISL_568399, EP1_ISL_568400, EP1_ISL_568401, EP1_ISL_568402, EP1_ISL_568403, EP1_ISL_568404, EP1_ISL_568405, EP1_ISL_568406, EP1_ISL_568407, EP1_ISL_568408, EP1_ISL_568409, EP1_ISL_568410, EP1_ISL_568411, EP1_ISL_568412, EP1_ISL_568413, EP1_ISL_568414, EP1_ISL_568415, EP1_ISL_568416, EP1_ISL_568417, EP1_ISL_568418, EP1_ISL_568419, EP1_ISL_568420, EP1_ISL_568421, EP1_ISL_568422, EP1_ISL_568423, EP1_ISL_568424, EP1_ISL_568425, EP1_ISL_568426, EP1_ISL_568427, EP1_ISL_568428, EP1_ISL_568429, EP1_ISL_568430, EP1_ISL_568431, EP1_ISL_568432, EP1_ISL_568433, EP1_ISL_568434, EP1_ISL_568435, EP1_ISL_568436, EP1_ISL_568437, EP1_ISL_568438, EP1_ISL_568439, EP1_ISL_568440, EP1_ISL_568441, EP1_ISL_568442, EP1_ISL_568443, EP1_ISL_568444, EP1_ISL_568445, EP1_ISL_568446, EP1_ISL_568447, EP1_ISL_568448, EP1_ISL_568449, EP1_ISL_568450, EP1_ISL_568451, EP1_ISL_568452, EP1_ISL_568453, EP1_ISL_568454, EP1_ISL_568455, EP1_ISL_568456, EP1_ISL_568457, EP1_ISL_568458, EP1_ISL_568459, EP1_ISL_568460 | see above | Lighthouse Lab in Glasgow                                                                                                                                                                       | Wellcome Sanger Institute for the COVID-19 Genomics UK (COG-UK) consortium         | Jackson, Ian Johnson, Dominic Kwiatkowski, Cordelia Langford, John Sillitoe on behalf of the Wellcome Sanger Institute COVID-19 Surveillance Team                                                                                                                                                                                                                                                                                                                                                                                                                                                                                                                                      |
| EP1_ISL_569030, EP1_ISL_569031, EP1_ISL_569046, EP1_ISL_569073, EP1_ISL_569097, EP1_ISL_569098, EP1_ISL_569108, EP1_ISL_569113, EP1_ISL_569122, EP1_ISL_569127, EP1_ISL_569140, EP1_ISL_569174, EP1_ISL_569181, EP1_ISL_569198, EP1_ISL_569199, EP1_ISL_569222, EP1_ISL_569229, EP1_ISL_569237                                                                                                                                                                                                                                                                                                                                                                                                                                                                                                                                                                                                                                                                                                                                                                                                                                                                                                                                                                                                                                                                                                                                                                                                                                                                                                                                                                                                                                                                                                                                                                                                                                                                                                                                                                                                                                                                                                                                                                                                                                                                                                                                                                                                                                                                                                                                                                                                                                                                                                                                                                                                                                                                                                                                                                                                                                                                                                                                                                                                                                                                                                                                                                                                                                                                                                                 | see above | MEPHI, Aix Marseille University<br>Amedeo di Savoia                                                                                                                                             | MEPHI, Aix Marseille University<br>Cossetto lab, Karolinska Institutet, SciLifeLab | Michèle Simonetti, Maria Grazia Villa, Luuk Harbers, Ning Zhang, Anna Sapino, Valeria Ghisetti, Nicola Cossetto                                                                                                                                                                                                                                                                                                                                                                                                                                                                                                                                                                        |
| EP1_ISL_572405, EP1_ISL_572407                                                                                                                                                                                                                                                                                                                                                                                                                                                                                                                                                                                                                                                                                                                                                                                                                                                                                                                                                                                                                                                                                                                                                                                                                                                                                                                                                                                                                                                                                                                                                                                                                                                                                                                                                                                                                                                                                                                                                                                                                                                                                                                                                                                                                                                                                                                                                                                                                                                                                                                                                                                                                                                                                                                                                                                                                                                                                                                                                                                                                                                                                                                                                                                                                                                                                                                                                                                                                                                                                                                                                                                 | see above | Wales Specialist Virology Centre Sequencing lab: Pathogen Genomics Unit                                                                                                                         | COVID-19 Genomics UK (COG-UK) Consortium                                           | Catherine Moore, Jonathan Evans, Laura Gifford, Malorie Perry, Simon Cottrell, Angela Marchbank, Alec Birchley, Alexander Adams, Amy Gaslin, Breë Gatica-Wilcox, Jason Coombes, Joel Southgate, Lauren Gilbert, Lee Graham, Nicole Pacochiani, Sara Kunzliens-Summerhayes, Sarah Taylor, Sophie Jones, Sara Rey, Matthew Bull, Joanne Watkins, Sally Corden, Tom Connor                                                                                                                                                                                                                                                                                                                |
| EP1_ISL_572412                                                                                                                                                                                                                                                                                                                                                                                                                                                                                                                                                                                                                                                                                                                                                                                                                                                                                                                                                                                                                                                                                                                                                                                                                                                                                                                                                                                                                                                                                                                                                                                                                                                                                                                                                                                                                                                                                                                                                                                                                                                                                                                                                                                                                                                                                                                                                                                                                                                                                                                                                                                                                                                                                                                                                                                                                                                                                                                                                                                                                                                                                                                                                                                                                                                                                                                                                                                                                                                                                                                                                                                                 | see above | Northumbria University / South Tees Hospitals NHS Foundation Trust / North Tees and Hartlepool NHS Foundation Trust / Newcastle Hospitals NHS Foundation Trust                                  | COVID-19 Genomics UK (COG-UK) Consortium                                           | Darren L Smith, Andrew Nelson, Matthew Easton, Gregg R Young, Joshua Loh, John Allan, Mohammad A Tariq, Giles S Holt, Gary Black, Wen C Yew, Lynn Dover, Paul Baker, Steve Liggitt, Sarah Essex, Jane Greenaway, Debba Padgett, Olive Graham, Garen Scott, Edward Barton, Emma Swindells, Brendan Payne, Jennifer Collins, Yvett Tara Gary, Eltringham                                                                                                                                                                                                                                                                                                                                 |
| EP1_ISL_572413                                                                                                                                                                                                                                                                                                                                                                                                                                                                                                                                                                                                                                                                                                                                                                                                                                                                                                                                                                                                                                                                                                                                                                                                                                                                                                                                                                                                                                                                                                                                                                                                                                                                                                                                                                                                                                                                                                                                                                                                                                                                                                                                                                                                                                                                                                                                                                                                                                                                                                                                                                                                                                                                                                                                                                                                                                                                                                                                                                                                                                                                                                                                                                                                                                                                                                                                                                                                                                                                                                                                                                                                 | see above | Virology Department, Royal Infirmary of Edinburgh, NHS Lothian / School of Biological Sciences, University of Edinburgh / Institute of Genetics and Molecular Medicine, University of Edinburgh | COVID-19 Genomics UK (COG-UK) Consortium                                           | McHugh M, Dewar R, Rooke S, Gallagher M, Balcaza C, O'Toole Á, Scheer E, Hill V, McCrone JT, Colquhoun R, Yu X, Jackson B, Rambaut A, Williams TC, Templeton K                                                                                                                                                                                                                                                                                                                                                                                                                                                                                                                         |
| EP1_ISL_572415                                                                                                                                                                                                                                                                                                                                                                                                                                                                                                                                                                                                                                                                                                                                                                                                                                                                                                                                                                                                                                                                                                                                                                                                                                                                                                                                                                                                                                                                                                                                                                                                                                                                                                                                                                                                                                                                                                                                                                                                                                                                                                                                                                                                                                                                                                                                                                                                                                                                                                                                                                                                                                                                                                                                                                                                                                                                                                                                                                                                                                                                                                                                                                                                                                                                                                                                                                                                                                                                                                                                                                                                 | see above | West of Scotland Specialist Virology Centre, NHSGGC / MRC-University of Glasgow Centre for Virus Research                                                                                       | COVID-19 Genomics UK (COG-UK) Consortium                                           | Ana da Silva Filipe, Natasha Johnson, Kathy Smollett, Daniel Muir, Stephen Carmichael, Lily Tong, Janna Nichols, Elini Arandy-Cortes, Kyriaki Nontkou, Sara McDonald, Marc Niebel, Patanee Asamphant, Richard Orron, Joseph Hughes, Steena Vaitpalilly, David L Robertson, Asadair MacLellan, Rory Gunnson, Kathy Li, Igor Starniski, Natasha Jersudason, Rajiv Shah, James Shephard, Antonia Ho, Emma Thomson                                                                                                                                                                                                                                                                         |
| EP1_ISL_572425                                                                                                                                                                                                                                                                                                                                                                                                                                                                                                                                                                                                                                                                                                                                                                                                                                                                                                                                                                                                                                                                                                                                                                                                                                                                                                                                                                                                                                                                                                                                                                                                                                                                                                                                                                                                                                                                                                                                                                                                                                                                                                                                                                                                                                                                                                                                                                                                                                                                                                                                                                                                                                                                                                                                                                                                                                                                                                                                                                                                                                                                                                                                                                                                                                                                                                                                                                                                                                                                                                                                                                                                 | see above | Virology Department, Royal Infirmary of Edinburgh, NHS Lothian / School of Biological Sciences, University of Edinburgh / Institute of Genetics and Molecular Medicine, University of Edinburgh | COVID-19 Genomics UK (COG-UK) Consortium                                           | McHugh M, Dewar R, Rooke S, Gallagher M, Balcaza C, O'Toole Á, Scheer E, Hill V, McCrone JT, Colquhoun R, Yu X, Jackson B, Rambaut A, Williams TC, Templeton K                                                                                                                                                                                                                                                                                                                                                                                                                                                                                                                         |
| EP1_ISL_572440, EP1_ISL_572449                                                                                                                                                                                                                                                                                                                                                                                                                                                                                                                                                                                                                                                                                                                                                                                                                                                                                                                                                                                                                                                                                                                                                                                                                                                                                                                                                                                                                                                                                                                                                                                                                                                                                                                                                                                                                                                                                                                                                                                                                                                                                                                                                                                                                                                                                                                                                                                                                                                                                                                                                                                                                                                                                                                                                                                                                                                                                                                                                                                                                                                                                                                                                                                                                                                                                                                                                                                                                                                                                                                                                                                 | see above | Quadrant Institute Bioscience                                                                                                                                                                   | COVID-19 Genomics UK (COG-UK) Consortium                                           | Dave J Baker, Gemma L Kay, Alp Aydin, Thanh Le-Viet, Steven Rudder, Ana P. Tedrin, Anastasia Kolyva, Maria Diaz, Leonardo de Oliveira Martins, Nabil-Farred Alkhran, Lizzie Meadows, Rachael Stanley, Nguzo Elnurog, Muhammad Yasin, Nicholas M. Thomson, Alexander J Trotter, Rachel Gilroy, Samuel Bloomfield, Charles Stuart, Andrew Bell, Reemeh Prakash, Sami Dewsevic, Alison E. Maher, John Wain, Mark Webber, Andrew J. Page, Justin O'Grady                                                                                                                                                                                                                                   |
| EP1_ISL_572461, EP1_ISL_572465                                                                                                                                                                                                                                                                                                                                                                                                                                                                                                                                                                                                                                                                                                                                                                                                                                                                                                                                                                                                                                                                                                                                                                                                                                                                                                                                                                                                                                                                                                                                                                                                                                                                                                                                                                                                                                                                                                                                                                                                                                                                                                                                                                                                                                                                                                                                                                                                                                                                                                                                                                                                                                                                                                                                                                                                                                                                                                                                                                                                                                                                                                                                                                                                                                                                                                                                                                                                                                                                                                                                                                                 | see above | Wales Specialist Virology Centre Sequencing lab: Pathogen Genomics Unit                                                                                                                         | COVID-19 Genomics UK (COG-UK) Consortium                                           | Catherine Moore, Jonathan Evans, Laura Gifford, Malorie Perry, Simon Cottrell, Angela Marchbank, Alec Birchley, Alexander Adams, Amy Gaslin, Breë Gatica-Wilcox, Jason Coombes, Joel Southgate, Lauren Gilbert, Lee Graham, Nicole Pacochiani, Sara Kunzliens-Summerhayes, Sarah Taylor, Sophie Jones, Sara Rey, Matthew Bull, Joanne Watkins, Sally Corden, Tom Connor                                                                                                                                                                                                                                                                                                                |
| EP1_ISL_572470                                                                                                                                                                                                                                                                                                                                                                                                                                                                                                                                                                                                                                                                                                                                                                                                                                                                                                                                                                                                                                                                                                                                                                                                                                                                                                                                                                                                                                                                                                                                                                                                                                                                                                                                                                                                                                                                                                                                                                                                                                                                                                                                                                                                                                                                                                                                                                                                                                                                                                                                                                                                                                                                                                                                                                                                                                                                                                                                                                                                                                                                                                                                                                                                                                                                                                                                                                                                                                                                                                                                                                                                 | see above | West of Scotland Specialist Virology Centre, NHSGGC / MRC-University of Glasgow Centre for Virus Research                                                                                       | COVID-19 Genomics UK (COG-UK) Consortium                                           | Ana da Silva Filipe, Natasha Johnson, Kathy Smollett, Daniel Muir, Stephen Carmichael, Lily Tong, Janna Nichols, Elini Arandy-Cortes, Kyriaki Nontkou, Sara McDonald, Marc Niebel, Patanee Asamphant, Richard Orron, Joseph Hughes, Steena Vaitpalilly, David L Robertson, Asadair MacLellan, Rory Gunnson, Kathy Li, Igor Starniski, Natasha Jersudason, Rajiv Shah, James Shephard, Antonia Ho, Emma Thomson                                                                                                                                                                                                                                                                         |
| EP1_ISL_572471, EP1_ISL_572472                                                                                                                                                                                                                                                                                                                                                                                                                                                                                                                                                                                                                                                                                                                                                                                                                                                                                                                                                                                                                                                                                                                                                                                                                                                                                                                                                                                                                                                                                                                                                                                                                                                                                                                                                                                                                                                                                                                                                                                                                                                                                                                                                                                                                                                                                                                                                                                                                                                                                                                                                                                                                                                                                                                                                                                                                                                                                                                                                                                                                                                                                                                                                                                                                                                                                                                                                                                                                                                                                                                                                                                 | see above | Department of Pathology, University of Cambridge                                                                                                                                                | COVID-19 Genomics UK (COG-UK) Consortium                                           | Aminu S. Jahun, Yasmin Chaudhry, Grant Hall, Iliana Georgeana, Myra Hosmilo, Martin D. Curran, Malee Pickett, Surendra Panwar, Ian Goodfellow                                                                                                                                                                                                                                                                                                                                                                                                                                                                                                                                          |
| EP1_ISL_572479                                                                                                                                                                                                                                                                                                                                                                                                                                                                                                                                                                                                                                                                                                                                                                                                                                                                                                                                                                                                                                                                                                                                                                                                                                                                                                                                                                                                                                                                                                                                                                                                                                                                                                                                                                                                                                                                                                                                                                                                                                                                                                                                                                                                                                                                                                                                                                                                                                                                                                                                                                                                                                                                                                                                                                                                                                                                                                                                                                                                                                                                                                                                                                                                                                                                                                                                                                                                                                                                                                                                                                                                 | see above | Liverpool Clinical Laboratories                                                                                                                                                                 | COVID-19 Genomics UK (COG-UK) Consortium                                           | Sam Haddeney, Anila Lucaci, Steve Paterson, Julian Hiscox, Alistair Darity, M Almsaud, A Alvarezli, Muhammad Aruwaili, Stuart D Armstrong, Jones Benjamin, Eleanor G Bentley, Anu Chawla, Jordan J Clark, Angela Cowell, Richard Eccles, Isabel Garcia-Dorival, Matthew Gemmill, Alessandro Gerada, PKR Gilmore, Richard Gregory, Ximeng Han, Catherine Hartley, Margaret Hughes, Wilan Iurriza-Gomara, James Johnson, L Liu, Jennifer Marston, Charlotte Nelson, Elaine O'Toole, Cassie Olatolu, Reemeh Prakash, Handal, Lucile Rankow, N P Randle, Trevor Ian Robinson, Parul Sharma, Ghada T Shawli, James P Stewart, Neil Swainston, Ecaterina Varnos, Joanne Wats, Mark Whitehead |
| EP1_ISL_572483                                                                                                                                                                                                                                                                                                                                                                                                                                                                                                                                                                                                                                                                                                                                                                                                                                                                                                                                                                                                                                                                                                                                                                                                                                                                                                                                                                                                                                                                                                                                                                                                                                                                                                                                                                                                                                                                                                                                                                                                                                                                                                                                                                                                                                                                                                                                                                                                                                                                                                                                                                                                                                                                                                                                                                                                                                                                                                                                                                                                                                                                                                                                                                                                                                                                                                                                                                                                                                                                                                                                                                                                 | see above | Virology Department, Royal Infirmary of Edinburgh, NHS Lothian / School of Biological Sciences, University of Edinburgh / Institute of Genetics and Molecular Medicine, University of Edinburgh | COVID-19 Genomics UK (COG-UK) Consortium                                           | McHugh M, Dewar R, Rooke S, Gallagher M, Balcaza C, O'Toole Á, Scheer E, Hill V, McCrone JT, Colquhoun R, Yu X, Jackson B, Rambaut A, Williams TC, Templeton K                                                                                                                                                                                                                                                                                                                                                                                                                                                                                                                         |
| EP1_ISL_572487, EP1_ISL_572496                                                                                                                                                                                                                                                                                                                                                                                                                                                                                                                                                                                                                                                                                                                                                                                                                                                                                                                                                                                                                                                                                                                                                                                                                                                                                                                                                                                                                                                                                                                                                                                                                                                                                                                                                                                                                                                                                                                                                                                                                                                                                                                                                                                                                                                                                                                                                                                                                                                                                                                                                                                                                                                                                                                                                                                                                                                                                                                                                                                                                                                                                                                                                                                                                                                                                                                                                                                                                                                                                                                                                                                 | see above | Wales Specialist Virology Centre Sequencing lab: Pathogen Genomics Unit                                                                                                                         | COVID-19 Genomics UK (COG-UK) Consortium                                           | Catherine Moore, Jonathan Evans, Laura Gifford, Malorie Perry, Simon Cottrell, Angela Marchbank, Alec Birchley, Alexander Adams, Amy Gaslin, Breë Gatica-Wilcox, Jason Coombes, Joel Southgate, Lauren Gilbert, Lee Graham, Nicole Pacochiani, Sara Kunzliens-Summerhayes, Sarah Taylor, Sophie Jones, Sara Rey, Matthew Bull, Joanne Watkins, Sally Corden, Tom Connor                                                                                                                                                                                                                                                                                                                |
| EP1_ISL_572497, EP1_ISL_572499                                                                                                                                                                                                                                                                                                                                                                                                                                                                                                                                                                                                                                                                                                                                                                                                                                                                                                                                                                                                                                                                                                                                                                                                                                                                                                                                                                                                                                                                                                                                                                                                                                                                                                                                                                                                                                                                                                                                                                                                                                                                                                                                                                                                                                                                                                                                                                                                                                                                                                                                                                                                                                                                                                                                                                                                                                                                                                                                                                                                                                                                                                                                                                                                                                                                                                                                                                                                                                                                                                                                                                                 | see above | Quadrant Institute Bioscience                                                                                                                                                                   | COVID-19 Genomics UK (COG-UK) Consortium                                           | Dave J Baker, Gemma L Kay, Alp Aydin, Thanh Le-Viet, Steven Rudder, Ana P. Tedrin, Anastasia Kolyva, Maria Diaz, Leonardo de Oliveira Martins, Nabil-Farred Alkhran, Lizzie Meadows, Rachael Stanley, Nguzo Elnurog, Muhammad Yasin, Nicholas M. Thomson, Alexander J Trotter, Rachel Gilroy, Samuel Bloomfield, Charles Stuart, Andrew Bell, Reemeh Prakash, Sami Dewsevic, Alison E. Maher, John Wain, Mark Webber, Andrew J. Page, Justin O'Grady                                                                                                                                                                                                                                   |
| EP1_ISL_572501                                                                                                                                                                                                                                                                                                                                                                                                                                                                                                                                                                                                                                                                                                                                                                                                                                                                                                                                                                                                                                                                                                                                                                                                                                                                                                                                                                                                                                                                                                                                                                                                                                                                                                                                                                                                                                                                                                                                                                                                                                                                                                                                                                                                                                                                                                                                                                                                                                                                                                                                                                                                                                                                                                                                                                                                                                                                                                                                                                                                                                                                                                                                                                                                                                                                                                                                                                                                                                                                                                                                                                                                 | see above | Wales Specialist Virology Centre Sequencing lab: Pathogen Genomics Unit                                                                                                                         | COVID-19 Genomics UK (COG-UK) Consortium                                           | Catherine Moore, Jonathan Evans, Laura Gifford, Malorie Perry, Simon Cottrell, Angela Marchbank, Alec Birchley, Alexander Adams, Amy Gaslin, Breë Gatica-Wilcox, Jason Coombes, Joel Southgate, Lauren Gilbert, Lee Graham, Nicole Pacochiani, Sara Kunzliens-Summerhayes, Sarah Taylor, Sophie Jones, Sara Rey, Matthew Bull, Joanne Watkins, Sally Corden, Tom Connor                                                                                                                                                                                                                                                                                                                |
| EP1_ISL_572503                                                                                                                                                                                                                                                                                                                                                                                                                                                                                                                                                                                                                                                                                                                                                                                                                                                                                                                                                                                                                                                                                                                                                                                                                                                                                                                                                                                                                                                                                                                                                                                                                                                                                                                                                                                                                                                                                                                                                                                                                                                                                                                                                                                                                                                                                                                                                                                                                                                                                                                                                                                                                                                                                                                                                                                                                                                                                                                                                                                                                                                                                                                                                                                                                                                                                                                                                                                                                                                                                                                                                                                                 | see above | Quadrant Institute Bioscience                                                                                                                                                                   | COVID-19 Genomics UK (COG-UK) Consortium                                           | Dave J Baker, Gemma L Kay, Alp Aydin, Thanh Le-Viet, Steven Rudder, Ana P. Tedrin, Anastasia Kolyva, Maria Diaz, Leonardo de Oliveira Martins, Nabil-Farred Alkhran, Lizzie Meadows, Rachael Stanley, Nguzo Elnurog, Muhammad Yasin, Nicholas M. Thomson, Alexander J Trotter, Rachel Gilroy, Samuel Bloomfield, Charles Stuart, Andrew Bell, Reemeh Prakash, Sami Dewsevic, Alison E. Maher, John Wain, Mark Webber, Andrew J. Page, Justin O'Grady                                                                                                                                                                                                                                   |
| EP1_ISL_572506                                                                                                                                                                                                                                                                                                                                                                                                                                                                                                                                                                                                                                                                                                                                                                                                                                                                                                                                                                                                                                                                                                                                                                                                                                                                                                                                                                                                                                                                                                                                                                                                                                                                                                                                                                                                                                                                                                                                                                                                                                                                                                                                                                                                                                                                                                                                                                                                                                                                                                                                                                                                                                                                                                                                                                                                                                                                                                                                                                                                                                                                                                                                                                                                                                                                                                                                                                                                                                                                                                                                                                                                 | see above | Liverpool Clinical Laboratories                                                                                                                                                                 | COVID-19 Genomics UK (COG-UK) Consortium                                           | McHugh M, Dewar R, Rooke S, Gallagher M, Balcaza C, O'Toole Á, Scheer E, Hill V, McCrone JT, Colquhoun R, Yu X, Jackson B, Rambaut A, Williams TC, Templeton K                                                                                                                                                                                                                                                                                                                                                                                                                                                                                                                         |
| EP1_ISL_572514                                                                                                                                                                                                                                                                                                                                                                                                                                                                                                                                                                                                                                                                                                                                                                                                                                                                                                                                                                                                                                                                                                                                                                                                                                                                                                                                                                                                                                                                                                                                                                                                                                                                                                                                                                                                                                                                                                                                                                                                                                                                                                                                                                                                                                                                                                                                                                                                                                                                                                                                                                                                                                                                                                                                                                                                                                                                                                                                                                                                                                                                                                                                                                                                                                                                                                                                                                                                                                                                                                                                                                                                 | see above | Virology Department, Royal Infirmary of Edinburgh, NHS Lothian / School of Biological Sciences, University of Edinburgh / Institute of Genetics and Molecular Medicine, University of Edinburgh | COVID-19 Genomics UK (COG-UK) Consortium                                           | Sam Haddeney, Anila Lucaci, Steve Paterson, Julian Hiscox, Alistair Darity, M Almsaud, A Alvarezli, Muhammad Aruwaili, Stuart D Armstrong, Jones Benjamin, Eleanor G Bentley, Anu Chawla, Jordan J Clark, Angela Cowell, Richard Eccles, Isabel Garcia-Dorival, Matthew Gemmill, Alessandro Gerada, PKR Gilmore, Richard Gregory, Ximeng Han, Catherine Hartley, Margaret Hughes, Wilan Iurriza-Gomara, James Johnson, L Liu, Jennifer Marston, Charlotte Nelson, Elaine O'Toole, Cassie Olatolu, Reemeh Prakash, Handal, Lucile Rankow, N P Randle, Trevor Ian Robinson, Parul Sharma, Ghada T Shawli, James P Stewart, Neil Swainston, Ecaterina Varnos, Joanne Wats, Mark Whitehead |
| EP1_ISL_572515                                                                                                                                                                                                                                                                                                                                                                                                                                                                                                                                                                                                                                                                                                                                                                                                                                                                                                                                                                                                                                                                                                                                                                                                                                                                                                                                                                                                                                                                                                                                                                                                                                                                                                                                                                                                                                                                                                                                                                                                                                                                                                                                                                                                                                                                                                                                                                                                                                                                                                                                                                                                                                                                                                                                                                                                                                                                                                                                                                                                                                                                                                                                                                                                                                                                                                                                                                                                                                                                                                                                                                                                 | see above | Northumbria University / South Tees Hospitals NHS Foundation Trust / North Cumbria Integrated Care NHS                                                                                          | COVID-19 Genomics UK (COG-UK) Consortium                                           | McHugh M, Dewar R, Rooke S, Gallagher M, Balcaza C, O'Toole Á, Scheer E, Hill V, McCrone JT, Colquhoun R, Yu X, Jackson B, Rambaut A, Williams TC, Templeton K                                                                                                                                                                                                                                                                                                                                                                                                                                                                                                                         |

|                                                                                                                |                                                                                                                                                                                                                     |                                          |                                                                                                                                                                                                                                                                                                                                                                                                                                                                                                                                                                                                                                                                                      |
|----------------------------------------------------------------------------------------------------------------|---------------------------------------------------------------------------------------------------------------------------------------------------------------------------------------------------------------------|------------------------------------------|--------------------------------------------------------------------------------------------------------------------------------------------------------------------------------------------------------------------------------------------------------------------------------------------------------------------------------------------------------------------------------------------------------------------------------------------------------------------------------------------------------------------------------------------------------------------------------------------------------------------------------------------------------------------------------------|
| EPI_ISL_572519                                                                                                 | Foundation Trust / North Tees and Hartlepool NHS Foundation Trust / Newcastle Hospitals NHS Foundation Trust                                                                                                        | COVID-19 Genomics UK (COG-UK) Consortium | Aminu S. Jatum, Yasmin Chaudry, Grant Hall, Ilana Georgana, Myra Hosnillo, Martin D. Curran, Malte Frickert, Suerendra Parmar, Ian Goodfellow                                                                                                                                                                                                                                                                                                                                                                                                                                                                                                                                        |
| EPI_ISL_572528                                                                                                 | Department of Pathology, University of Cambridge<br>West of Scotland Specialist Virology Centre, NHS-SCG / MRC-University of Glasgow Centre for Virus Research                                                      | COVID-19 Genomics UK (COG-UK) Consortium | Ana da Silva Filipe, Natasha Johnson, Kathy Smollett, Daniel Hair, Stephen Carmichael, Lily Tong, Janna Nichols, Elini Aranday-Corres, Kyriaki Nomkou, Sarah McDonald, Marc Niebel, Patawee Asamphann, Richard Orton, Joseph Hughes, Steenu Vaitipilly, David L. Robertson, Asstidar MacLellan, Rory Gunson, Kathy Li, Igor Staninski, Natasha Jesudason, Rajiv Shah, James Shephard, Antonia Ho, Emma Thomson                                                                                                                                                                                                                                                                       |
| EPI_ISL_572531                                                                                                 | Wales Specialist Virology Centre Sequencing lab: Pathogen Genomics Unit                                                                                                                                             | COVID-19 Genomics UK (COG-UK) Consortium | Catherine Moore, Johnathan Evans, Laura Gifford, Malorie Perry, Simon Cottrell, Angela Marchbank, Alec Birchley, Alexander Adams, Amy Gasikin, Bree Gatica-Wilcox, Jason Coombes, Joel Soutigate, Lauren Gilbert, Lee Graham, Nicole Pachchiani, Sara Kunzlene-Summerhayes, Sarah Taylor, Sophie Jones, Sara Rey, Matthew Bull, Joanne Watkins, Sally Corden, Tom Connor                                                                                                                                                                                                                                                                                                             |
| EPI_ISL_572533                                                                                                 | Quadram Institute Bioscience                                                                                                                                                                                        | COVID-19 Genomics UK (COG-UK) Consortium | Dave J. Baker, Gemma L. Kay, Alp Aydin, Thanh Le-Viet, Steven Rudder, Ara P. Tedin, Anastasia Kolyva, Maria Diaz, Leonardo de Oliveira Martins, Nabil-Fareed Alkhran, Lizzie Meadows, Rachael Stanley, Ngooz Eunogo, Muhammad Yasir, Nicholas M. Thomson, Alexander J. Trotter, Rachel Gilroy, Samuel Bloomfield, Claire Stuart, Andrew Bell, Reenesh Prakash, Samir Dusevic, Alison E. Mather, John Wain, Mark Webber, Andrew J. Page, Justin O'Grady                                                                                                                                                                                                                               |
| EPI_ISL_572544                                                                                                 | Virology Department, Royal Infirmary of Edinburgh, NHS Lothian / School of Biological Sciences, University of Edinburgh / Institute of Genetics and Molecular Medicine, University of Edinburgh                     | COVID-19 Genomics UK (COG-UK) Consortium | McHugh M, Dewar R, Rooke S, Gallagher M, Balcaza C, O'Toole A, Soper E, Hill V, McCrone JT, Colquhoun R, Yu X, Jackson B, Rambaut A, Williams TC, Templeton K                                                                                                                                                                                                                                                                                                                                                                                                                                                                                                                        |
| EPI_ISL_572545                                                                                                 | Wales Specialist Virology Centre Sequencing lab: Pathogen Genomics Unit                                                                                                                                             | COVID-19 Genomics UK (COG-UK) Consortium | Catherine Moore, Johnathan Evans, Laura Gifford, Malorie Perry, Simon Cottrell, Angela Marchbank, Alec Birchley, Alexander Adams, Amy Gasikin, Bree Gatica-Wilcox, Jason Coombes, Joel Soutigate, Lauren Gilbert, Lee Graham, Nicole Pachchiani, Sara Kunzlene-Summerhayes, Sarah Taylor, Sophie Jones, Sara Rey, Matthew Bull, Joanne Watkins, Sally Corden, Tom Connor                                                                                                                                                                                                                                                                                                             |
| EPI_ISL_572548                                                                                                 | Quadram Institute Bioscience                                                                                                                                                                                        | COVID-19 Genomics UK (COG-UK) Consortium | Dave J. Baker, Gemma L. Kay, Alp Aydin, Thanh Le-Viet, Steven Rudder, Ara P. Tedin, Anastasia Kolyva, Maria Diaz, Leonardo de Oliveira Martins, Nabil-Fareed Alkhran, Lizzie Meadows, Rachael Stanley, Ngooz Eunogo, Muhammad Yasir, Nicholas M. Thomson, Alexander J. Trotter, Rachel Gilroy, Samuel Bloomfield, Claire Stuart, Andrew Bell, Reenesh Prakash, Samir Dusevic, Alison E. Mather, John Wain, Mark Webber, Andrew J. Page, Justin O'Grady                                                                                                                                                                                                                               |
| EPI_ISL_572558, EPI_ISL_572559, EPI_ISL_572560, EPI_ISL_572564, EPI_ISL_572565                                 | Wales Specialist Virology Centre Sequencing lab: Pathogen Genomics Unit                                                                                                                                             | COVID-19 Genomics UK (COG-UK) Consortium | Catherine Moore, Johnathan Evans, Laura Gifford, Malorie Perry, Simon Cottrell, Angela Marchbank, Alec Birchley, Alexander Adams, Amy Gasikin, Bree Gatica-Wilcox, Jason Coombes, Joel Soutigate, Lauren Gilbert, Lee Graham, Nicole Pachchiani, Sara Kunzlene-Summerhayes, Sarah Taylor, Sophie Jones, Sara Rey, Matthew Bull, Joanne Watkins, Sally Corden, Tom Connor                                                                                                                                                                                                                                                                                                             |
| EPI_ISL_572572                                                                                                 | Northumbria University / South Tees Hospitals NHS Foundation Trust / North Cumbria Integrated Care NHS Foundation Trust / North Tees and Hartlepool NHS Foundation Trust / Newcastle Hospitals NHS Foundation Trust | COVID-19 Genomics UK (COG-UK) Consortium | Thrishani de Silva, Matthew Parker, Nikki Smith, Adri Anjaly, Rebecca Brown, Luke Green, Rachel Tucker, Paul Parsons, Danielle Groves, Katie Johnson, Laura Carrifero, Alex Keeley, Dave Partridge, Matthew Wykes, Benjamin Lindsey, Mehmet Yavuz, Mohammad Raza, Carad Evans                                                                                                                                                                                                                                                                                                                                                                                                        |
| EPI_ISL_572575, EPI_ISL_572576, EPI_ISL_572577, EPI_ISL_572580                                                 | Wales Specialist Virology Centre Sequencing lab: Pathogen Genomics Unit                                                                                                                                             | COVID-19 Genomics UK (COG-UK) Consortium | Darren L Smith, Andrew Nelson, Matthew Bastion, Greg R Young, Joshua Loh, John Allan, Mohammad A Tariq, Giles S Holt, Gary Black, Wen C Yew, Lynn Dover, Paul Baker, Steve Liggett, Sarah Essex, Jane Greenaway, Debra Padgett, Olive Graham, Garren Scott, Edward Barton, Emma Swindells, Brendan Payne, Jennifer Collins, Yasi Tara, Gary Eltringham                                                                                                                                                                                                                                                                                                                               |
| EPI_ISL_572599                                                                                                 | Virology Department, Royal Infirmary of Edinburgh, NHS Lothian / School of Biological Sciences, University of Edinburgh / Institute of Genetics and Molecular Medicine, University of Edinburgh                     | COVID-19 Genomics UK (COG-UK) Consortium | Catherine Moore, Johnathan Evans, Laura Gifford, Malorie Perry, Simon Cottrell, Angela Marchbank, Alec Birchley, Alexander Adams, Amy Gasikin, Bree Gatica-Wilcox, Jason Coombes, Joel Soutigate, Lauren Gilbert, Lee Graham, Nicole Pachchiani, Sara Kunzlene-Summerhayes, Sarah Taylor, Sophie Jones, Sara Rey, Matthew Bull, Joanne Watkins, Sally Corden, Tom Connor                                                                                                                                                                                                                                                                                                             |
| EPI_ISL_572604                                                                                                 | Liverpool Clinical Laboratories                                                                                                                                                                                     | COVID-19 Genomics UK (COG-UK) Consortium | McHugh M, Dewar R, Rooke S, Gallagher M, Balcaza C, O'Toole A, Soper E, Hill V, McCrone JT, Colquhoun R, Yu X, Jackson B, Rambaut A, Williams TC, Templeton K                                                                                                                                                                                                                                                                                                                                                                                                                                                                                                                        |
| EPI_ISL_572609                                                                                                 | Virology Department, Sheffield Teaching Hospitals NHS Foundation Trust, Department of Infection, Immunity and Cardiovascular Disease, The Medical School, University of Sheffield                                   | COVID-19 Genomics UK (COG-UK) Consortium | Sami Haidenry, Anita Lucaci, Steve Paterson, Julian Hiscox, Alistair Darty, M Amsaud, A Alrezali, Muhammad Aruwalli, Stuart D Armstrong, Jones Benjamin, Eleanor G Bentley, Anu Charvia, Jordan J Clark, Angela Cowell, Richard Eccles, Isabel Garcia-Dorval, Matthew Gemmill, Alessando Gerada, PFR Gaimore, Richard Gregory, Ximing Han, Catherine Hartley, Margaret Hughes, Wilan Iurizaga-Gomara, James Johnson, L Liu, Jennifer Marston, Charlotte Nelson, Elaine O'roole, Casisse Olajele, Rebekah Pearce-Harndal, Lucille Rankin, N.P Parvate, Trevor Ian Robson, Parul Sharma, Ghada T Shawi, James P Stewart, Neil Swainson, Ecaterina Varnos, Joanne Virts, Mark Whitehead |
| EPI_ISL_572614                                                                                                 | Wales Specialist Virology Centre Sequencing lab: Pathogen Genomics Unit                                                                                                                                             | COVID-19 Genomics UK (COG-UK) Consortium | Thrishani de Silva, Matthew Parker, Nikki Smith, Adri Anjaly, Rebecca Brown, Luke Green, Rachel Tucker, Paul Parsons, Danielle Groves, Katie Johnson, Laura Carrifero, Alex Keeley, Dave Partridge, Matthew Wykes, Benjamin Lindsey, Mehmet Yavuz, Mohammad Raza, Carad Evans                                                                                                                                                                                                                                                                                                                                                                                                        |
| EPI_ISL_572615                                                                                                 | Quadram Institute Bioscience                                                                                                                                                                                        | COVID-19 Genomics UK (COG-UK) Consortium | Catherine Moore, Johnathan Evans, Laura Gifford, Malorie Perry, Simon Cottrell, Angela Marchbank, Alec Birchley, Alexander Adams, Amy Gasikin, Bree Gatica-Wilcox, Jason Coombes, Joel Soutigate, Lauren Gilbert, Lee Graham, Nicole Pachchiani, Sara Kunzlene-Summerhayes, Sarah Taylor, Sophie Jones, Sara Rey, Matthew Bull, Joanne Watkins, Sally Corden, Tom Connor                                                                                                                                                                                                                                                                                                             |
| EPI_ISL_572629, EPI_ISL_572630, EPI_ISL_572631, EPI_ISL_572635, EPI_ISL_572636, EPI_ISL_572638, EPI_ISL_572640 | West of Scotland Specialist Virology Centre, NHS-SCG / MRC-University of Glasgow Centre for Virus Research                                                                                                          | COVID-19 Genomics UK (COG-UK) Consortium | Dave J. Baker, Gemma L. Kay, Alp Aydin, Thanh Le-Viet, Steven Rudder, Ara P. Tedin, Anastasia Kolyva, Maria Diaz, Leonardo de Oliveira Martins, Nabil-Fareed Alkhran, Lizzie Meadows, Rachael Stanley, Ngooz Eunogo, Muhammad Yasir, Nicholas M. Thomson, Alexander J. Trotter, Rachel Gilroy, Samuel Bloomfield, Claire Stuart, Andrew Bell, Reenesh Prakash, Samir Dusevic, Alison E. Mather, John Wain, Mark Webber, Andrew J. Page, Justin O'Grady                                                                                                                                                                                                                               |
| EPI_ISL_572653                                                                                                 | Quadram Institute Bioscience                                                                                                                                                                                        | COVID-19 Genomics UK (COG-UK) Consortium | Ana da Silva Filipe, Natasha Johnson, Kathy Smollett, Daniel Hair, Stephen Carmichael, Lily Tong, Janna Nichols, Elini Aranday-Corres, Kyriaki Nomkou, Sarah McDonald, Marc Niebel, Patawee Asamphann, Richard Orton, Joseph Hughes, Steenu Vaitipilly, David L. Robertson, Asstidar MacLellan, Rory Gunson, Kathy Li, Igor Staninski, Natasha Jesudason, Rajiv Shah, James Shephard, Antonia Ho, Emma Thomson                                                                                                                                                                                                                                                                       |
| EPI_ISL_572654                                                                                                 | Wales Specialist Virology Centre Sequencing lab: Pathogen Genomics Unit                                                                                                                                             | COVID-19 Genomics UK (COG-UK) Consortium | Catherine Moore, Johnathan Evans, Laura Gifford, Malorie Perry, Simon Cottrell, Angela Marchbank, Alec Birchley, Alexander Adams, Amy Gasikin, Bree Gatica-Wilcox, Jason Coombes, Joel Soutigate, Lauren Gilbert, Lee Graham, Nicole Pachchiani, Sara Kunzlene-Summerhayes, Sarah Taylor, Sophie Jones, Sara Rey, Matthew Bull, Joanne Watkins, Sally Corden, Tom Connor                                                                                                                                                                                                                                                                                                             |
| EPI_ISL_572655, EPI_ISL_572666                                                                                 | Quadram Institute Bioscience                                                                                                                                                                                        | COVID-19 Genomics UK (COG-UK) Consortium | Dave J. Baker, Gemma L. Kay, Alp Aydin, Thanh Le-Viet, Steven Rudder, Ara P. Tedin, Anastasia Kolyva, Maria Diaz, Leonardo de Oliveira Martins, Nabil-Fareed Alkhran, Lizzie Meadows, Rachael Stanley, Ngooz Eunogo, Muhammad Yasir, Nicholas M. Thomson, Alexander J. Trotter, Rachel Gilroy, Samuel Bloomfield, Claire Stuart, Andrew Bell, Reenesh Prakash, Samir Dusevic, Alison E. Mather, John Wain, Mark Webber, Andrew J. Page, Justin O'Grady                                                                                                                                                                                                                               |
| EPI_ISL_572672, EPI_ISL_572674, EPI_ISL_572676                                                                 | Wales Specialist Virology Centre Sequencing lab: Pathogen Genomics Unit                                                                                                                                             | COVID-19 Genomics UK (COG-UK) Consortium | Catherine Moore, Johnathan Evans, Laura Gifford, Malorie Perry, Simon Cottrell, Angela Marchbank, Alec Birchley, Alexander Adams, Amy Gasikin, Bree Gatica-Wilcox, Jason Coombes, Joel Soutigate, Lauren Gilbert, Lee Graham, Nicole Pachchiani, Sara Kunzlene-Summerhayes, Sarah Taylor, Sophie Jones, Sara Rey, Matthew Bull, Joanne Watkins, Sally Corden, Tom Connor                                                                                                                                                                                                                                                                                                             |

|                                                |                                                                                                                                                                                  |                                          |                                                                                                                                                                                                                                                                                                                                                                                                                                                                                                                                                                                                                                                                             |
|------------------------------------------------|----------------------------------------------------------------------------------------------------------------------------------------------------------------------------------|------------------------------------------|-----------------------------------------------------------------------------------------------------------------------------------------------------------------------------------------------------------------------------------------------------------------------------------------------------------------------------------------------------------------------------------------------------------------------------------------------------------------------------------------------------------------------------------------------------------------------------------------------------------------------------------------------------------------------------|
| EP1_ISL_572678                                 | Virology Department, Sheffield Teaching Hospitals NHS Foundation Trust/Department of Infection, Immunity and Cardiovascular Disease, The Medical School, University of Sheffield | COVID-19 Genomics UK (COG-UK) Consortium | Thushan de Silva, Matthew Parker, Nikki Smith, Adri Angyal, Rebecca Brown, Luke Green, Rachel Tucker, Paul Parsons, Danielle Groves, Katie Johnson, Laura Carliero, Alex Keeley, Dave Partridge, Matthew Wyles, Benjamin Lindsey, Mehmet Yavuz, Mohammad Raza, Carad Evans                                                                                                                                                                                                                                                                                                                                                                                                  |
| EP1_ISL_572886                                 | West of Scotland Specialist Virology Centre, NHSGGC / MRC-University of Glasgow Centre for Virus Research                                                                        | COVID-19 Genomics UK (COG-UK) Consortium | Ana da Silva Filipe, Natasha Johnson, Kathy Smollett, Daniel Hair, Stephen Carmichael, Lily Tong, Janna Nichols, Elini Arandys-Cortes, Kyriaki Norkkou, Sarah McDonald, Marc Niebel, Palawee Assamaphan, Richard Orton, Joseph Hughes, Steenu Vattipally, David L. Robertson, Asadur MacLean, Rory Gunnson, Kathy LI, Igor Starnitski, Natasha Jesusdason, Raviy Shah, James Shephard, Antonia Ho, Emma Thomson                                                                                                                                                                                                                                                             |
| EP1_ISL_572690, EP1_ISL_572698                 | Wales Specialist Virology Centre Sequencing lab: Pathogen Genomics Unit                                                                                                          | COVID-19 Genomics UK (COG-UK) Consortium | Catherine Moore, Johnathan Evans, Laura Gifford, Malorie Parry, Simon Cottrill, Angela Marchbank, Alec Birchley, Alexander Adams, Amy Gaskin, Bree Gatica-Wilcox, Jason Coombes, Joel Southgate, Lauren Gilbert, Lee Graham, Nicole Pachiani, Sara Kunzense-Summerhayes, Sarah Taylor, Sophie Jones, Sara Fey, Matthew Bull, Joanne Watkins, Sally Corden, Tom Connor                                                                                                                                                                                                                                                                                                       |
| EP1_ISL_572706                                 | Queens Medical Centre, Clinical Microbiology Department / DeepSeq Nottingham                                                                                                     | COVID-19 Genomics UK (COG-UK) Consortium | Gemma Clark, Wendy Smith, Manjinder Kriakh, Vicki M Fleming, Michelle M Lister, Hannah Howson-Weiss, Jonathan Ball, Patrick McCuire, Joseph Chappell, Theocharis Tselidis, Nadine Holmes, Matthew Carlisle, Christopher Moore, Fai Sang, Johnny Debebe, Victoria Wright, Matthew Loose                                                                                                                                                                                                                                                                                                                                                                                      |
| EP1_ISL_572733, EP1_ISL_572734, EP1_ISL_572738 | Liverpool Clinical Laboratories                                                                                                                                                  | COVID-19 Genomics UK (COG-UK) Consortium | Sam Hadeney, Amla Lucaci, Steve Paterson, Julian Hiscox, Alistair Darby, M Ainsaud, A Alrezahi, Muhamed Alruwaili, Stuart D Armstrong, Jones Benjamin, Eleanor G Bantley, Anu Chawla, Jordan Clark, Angela Connell, Richard Eccles, Isabel Garcia-Dorval, Matthew Gianni, Alessandro Gerada, PFC Gilmore, Richard Gregory, Xinying Han, Catherine Hanley, Margaret Hughes, Megan Turris-Gomara, James Johnson, L Liu, Jennifer Marston, Charitable Nelson, Elaine O'Toole, Cassia Olatun, Rebekah Perce-Flanigan, Lucile Hanlon, NP Rendell, Terry Ian Robinson, Paul Sharma, Ghada T Shavli, James P Stewart, Neil Swainson, Ecaterina Varos, Joanne Wains, Mark Whitehead |
| EP1_ISL_572745                                 | Quadram Institute Bioscience                                                                                                                                                     | COVID-19 Genomics UK (COG-UK) Consortium | Dave J Baker, Gemma L Kay, Alp Aydin, Thanh Le-Viet, Steven Rudder, Ara P. Tedim, Anastasia Kolyva, Maria Diaz, Leonardo de Oliveira Martins, Nabil-Fareed Alkhran, Lizzie Meadows, Rachael Stanley, Ngzot Eurnogo, Muhammad Yasir, Nicholas M. Thomson, Alexander J Trotter, Rachel Gilroy, Samuel Bloomfield, Claire Stuart, Andrew Bell, Reenesh Prakash, Sami Dewsevic, Alison E. Mather, John Wain, Mark Webber, Andrew J. Page, Justin O'Grady                                                                                                                                                                                                                        |
| EP1_ISL_572747                                 | Northumbria University / South Tees Hospitals NHS Foundation Trust / North Tees and Hartlepool NHS Foundation Trust / Newcastle Hospitals NHS Foundation Trust                   | COVID-19 Genomics UK (COG-UK) Consortium | Darren L Smith, Andrew Nelson, Matthew Bashiron, Gregg R Young, Joshua Loh, John Allen, Mohammed A Tariq, Giles S Holt, Gary Black, Wren C Yew, Lynn Dover, Paul Baker, Steve Liggall, Sarah Essex, Jane Greenaway, Debra Padgett, Cive Graham, Gairien Scott, Edward Baxter, Emma Symonds, Brendan Payne, Jennifer Collins, Yasir Talal, Gary Eltringham                                                                                                                                                                                                                                                                                                                   |
| EP1_ISL_572754                                 | Wales Specialist Virology Centre Sequencing lab: Pathogen Genomics Unit                                                                                                          | COVID-19 Genomics UK (COG-UK) Consortium | Catherine Moore, Johnathan Evans, Laura Gifford, Malorie Parry, Simon Cottrill, Angela Marchbank, Alec Birchley, Alexander Adams, Amy Gaskin, Bree Gatica-Wilcox, Jason Coombes, Joel Southgate, Lauren Gilbert, Lee Graham, Nicole Pachiani, Sara Kunzense-Summerhayes, Sarah Taylor, Sophie Jones, Sara Fey, Matthew Bull, Joanne Watkins, Sally Corden, Tom Connor                                                                                                                                                                                                                                                                                                       |
| EP1_ISL_572759                                 | Quadram Institute Bioscience                                                                                                                                                     | COVID-19 Genomics UK (COG-UK) Consortium | Dave J Baker, Gemma L Kay, Alp Aydin, Thanh Le-Viet, Steven Rudder, Ara P. Tedim, Anastasia Kolyva, Maria Diaz, Leonardo de Oliveira Martins, Nabil-Fareed Alkhran, Lizzie Meadows, Rachael Stanley, Ngzot Eurnogo, Muhammad Yasir, Nicholas M. Thomson, Alexander J Trotter, Rachel Gilroy, Samuel Bloomfield, Claire Stuart, Andrew Bell, Reenesh Prakash, Sami Dewsevic, Alison E. Mather, John Wain, Mark Webber, Andrew J. Page, Justin O'Grady                                                                                                                                                                                                                        |
| EP1_ISL_572761                                 | Liverpool Clinical Laboratories                                                                                                                                                  | COVID-19 Genomics UK (COG-UK) Consortium | Sam Hadeney, Amla Lucaci, Steve Paterson, Julian Hiscox, Alistair Darby, M Ainsaud, A Alrezahi, Muhamed Alruwaili, Stuart D Armstrong, Jones Benjamin, Eleanor G Bantley, Anu Chawla, Jordan Clark, Angela Connell, Richard Eccles, Isabel Garcia-Dorval, Matthew Gianni, Alessandro Gerada, PFC Gilmore, Richard Gregory, Xinying Han, Catherine Hanley, Margaret Hughes, Megan Turris-Gomara, James Johnson, L Liu, Jennifer Marston, Charitable Nelson, Elaine O'Toole, Cassia Olatun, Rebekah Perce-Flanigan, Lucile Hanlon, NP Rendell, Terry Ian Robinson, Paul Sharma, Ghada T Shavli, James P Stewart, Neil Swainson, Ecaterina Varos, Joanne Wains, Mark Whitehead |
| EP1_ISL_572765                                 | West of Scotland Specialist Virology Centre, NHSGGC / MRC-University of Glasgow Centre for Virus Research                                                                        | COVID-19 Genomics UK (COG-UK) Consortium | Ana da Silva Filipe, Natasha Johnson, Kathy Smollett, Daniel Hair, Stephen Carmichael, Lily Tong, Janna Nichols, Elini Arandys-Cortes, Kyriaki Norkkou, Sarah McDonald, Marc Niebel, Palawee Assamaphan, Richard Orton, Joseph Hughes, Steenu Vattipally, David L. Robertson, Asadur MacLean, Rory Gunnson, Kathy LI, Igor Starnitski, Natasha Jesusdason, Raviy Shah, James Shephard, Antonia Ho, Emma Thomson                                                                                                                                                                                                                                                             |
| EP1_ISL_572768                                 | Quadram Institute Bioscience                                                                                                                                                     | COVID-19 Genomics UK (COG-UK) Consortium | Dave J Baker, Gemma L Kay, Alp Aydin, Thanh Le-Viet, Steven Rudder, Ara P. Tedim, Anastasia Kolyva, Maria Diaz, Leonardo de Oliveira Martins, Nabil-Fareed Alkhran, Lizzie Meadows, Rachael Stanley, Ngzot Eurnogo, Muhammad Yasir, Nicholas M. Thomson, Alexander J Trotter, Rachel Gilroy, Samuel Bloomfield, Claire Stuart, Andrew Bell, Reenesh Prakash, Sami Dewsevic, Alison E. Mather, John Wain, Mark Webber, Andrew J. Page, Justin O'Grady                                                                                                                                                                                                                        |
| EP1_ISL_572778                                 | Wales Specialist Virology Centre Sequencing lab: Pathogen Genomics Unit                                                                                                          | COVID-19 Genomics UK (COG-UK) Consortium | Catherine Moore, Johnathan Evans, Laura Gifford, Malorie Parry, Simon Cottrill, Angela Marchbank, Alec Birchley, Alexander Adams, Amy Gaskin, Bree Gatica-Wilcox, Jason Coombes, Joel Southgate, Lauren Gilbert, Lee Graham, Nicole Pachiani, Sara Kunzense-Summerhayes, Sarah Taylor, Sophie Jones, Sara Fey, Matthew Bull, Joanne Watkins, Sally Corden, Tom Connor                                                                                                                                                                                                                                                                                                       |
| EP1_ISL_572780, EP1_ISL_572789                 | Quadram Institute Bioscience                                                                                                                                                     | COVID-19 Genomics UK (COG-UK) Consortium | Dave J Baker, Gemma L Kay, Alp Aydin, Thanh Le-Viet, Steven Rudder, Ara P. Tedim, Anastasia Kolyva, Maria Diaz, Leonardo de Oliveira Martins, Nabil-Fareed Alkhran, Lizzie Meadows, Rachael Stanley, Ngzot Eurnogo, Muhammad Yasir, Nicholas M. Thomson, Alexander J Trotter, Rachel Gilroy, Samuel Bloomfield, Claire Stuart, Andrew Bell, Reenesh Prakash, Sami Dewsevic, Alison E. Mather, John Wain, Mark Webber, Andrew J. Page, Justin O'Grady                                                                                                                                                                                                                        |
| EP1_ISL_572794                                 | West of Scotland Specialist Virology Centre, NHSGGC / MRC-University of Glasgow Centre for Virus Research                                                                        | COVID-19 Genomics UK (COG-UK) Consortium | Ana da Silva Filipe, Natasha Johnson, Kathy Smollett, Daniel Hair, Stephen Carmichael, Lily Tong, Janna Nichols, Elini Arandys-Cortes, Kyriaki Norkkou, Sarah McDonald, Marc Niebel, Palawee Assamaphan, Richard Orton, Joseph Hughes, Steenu Vattipally, David L. Robertson, Asadur MacLean, Rory Gunnson, Kathy LI, Igor Starnitski, Natasha Jesusdason, Raviy Shah, James Shephard, Antonia Ho, Emma Thomson                                                                                                                                                                                                                                                             |
| EP1_ISL_572805                                 | Wales Specialist Virology Centre Sequencing lab: Pathogen Genomics Unit                                                                                                          | COVID-19 Genomics UK (COG-UK) Consortium | Catherine Moore, Johnathan Evans, Laura Gifford, Malorie Parry, Simon Cottrill, Angela Marchbank, Alec Birchley, Alexander Adams, Amy Gaskin, Bree Gatica-Wilcox, Jason Coombes, Joel Southgate, Lauren Gilbert, Lee Graham, Nicole Pachiani, Sara Kunzense-Summerhayes, Sarah Taylor, Sophie Jones, Sara Fey, Matthew Bull, Joanne Watkins, Sally Corden, Tom Connor                                                                                                                                                                                                                                                                                                       |
| EP1_ISL_572808                                 | University College London, Great Ormond Street Hospital for Children NHS Foundation Trust, Imperial College Healthcare NHS Trust                                                 | COVID-19 Genomics UK (COG-UK) Consortium | Sergij Castellano, Rachel Williams, Mark Kristiansen, Paola Resende Silva, Sumrado Roy, Tony Brooks, Helena Tull, Paola Nola, Patricia Dial, Charaitle Williams, Leyla Forrest, Yasmin Fanchibhaya, Jacqueline Frndly, Samuel Weers, Juliane Brown, Kathryn Harris, Paul Hanbali, James Price, Alison Holmes, Judith Brauer                                                                                                                                                                                                                                                                                                                                                 |
| EP1_ISL_572810                                 | Wales Specialist Virology Centre Sequencing lab: Pathogen Genomics Unit                                                                                                          | COVID-19 Genomics UK (COG-UK) Consortium | Catherine Moore, Johnathan Evans, Laura Gifford, Malorie Parry, Simon Cottrill, Angela Marchbank, Alec Birchley, Alexander Adams, Amy Gaskin, Bree Gatica-Wilcox, Jason Coombes, Joel Southgate, Lauren Gilbert, Lee Graham, Nicole Pachiani, Sara Kunzense-Summerhayes, Sarah Taylor, Sophie Jones, Sara Fey, Matthew Bull, Joanne Watkins, Sally Corden, Tom Connor                                                                                                                                                                                                                                                                                                       |
| EP1_ISL_572812                                 | Quadram Institute Bioscience                                                                                                                                                     | COVID-19 Genomics UK (COG-UK) Consortium | Dave J Baker, Gemma L Kay, Alp Aydin, Thanh Le-Viet, Steven Rudder, Ara P. Tedim, Anastasia Kolyva, Maria Diaz, Leonardo de Oliveira Martins, Nabil-Fareed Alkhran, Lizzie Meadows, Rachael Stanley, Ngzot Eurnogo, Muhammad Yasir, Nicholas M. Thomson, Alexander J Trotter, Rachel Gilroy, Samuel Bloomfield, Claire Stuart, Andrew Bell, Reenesh Prakash, Sami Dewsevic, Alison E. Mather, John Wain, Mark Webber, Andrew J. Page, Justin O'Grady                                                                                                                                                                                                                        |
| EP1_ISL_572818                                 | Wales Specialist Virology Centre Sequencing lab: Pathogen Genomics Unit                                                                                                          | COVID-19 Genomics UK (COG-UK) Consortium | Catherine Moore, Johnathan Evans, Laura Gifford, Malorie Parry, Simon Cottrill, Angela Marchbank, Alec Birchley, Alexander Adams, Amy Gaskin, Bree Gatica-Wilcox, Jason Coombes, Joel Southgate, Lauren Gilbert, Lee Graham, Nicole Pachiani, Sara Kunzense-Summerhayes, Sarah Taylor, Sophie Jones, Sara Fey, Matthew Bull, Joanne Watkins, Sally Corden, Tom Connor                                                                                                                                                                                                                                                                                                       |
| EP1_ISL_572823                                 | Quadram Institute Bioscience                                                                                                                                                     | COVID-19 Genomics UK (COG-UK) Consortium | Dave J Baker, Gemma L Kay, Alp Aydin, Thanh Le-Viet, Steven Rudder, Ara P. Tedim, Anastasia Kolyva, Maria Diaz, Leonardo de Oliveira Martins, Nabil-Fareed Alkhran, Lizzie Meadows, Rachael Stanley, Ngzot Eurnogo, Muhammad Yasir, Nicholas M. Thomson, Alexander J Trotter, Rachel Gilroy, Samuel Bloomfield, Claire Stuart, Andrew Bell, Reenesh Prakash, Sami Dewsevic, Alison E. Mather, John Wain, Mark Webber, Andrew J. Page, Justin O'Grady                                                                                                                                                                                                                        |
| EP1_ISL_572827                                 | Liverpool Clinical Laboratories                                                                                                                                                  | COVID-19 Genomics UK (COG-UK) Consortium | Sam Hadeney, Amla Lucaci, Steve Paterson, Julian Hiscox, Alistair Darby, M Ainsaud, A Alrezahi, Muhamed Alruwaili, Stuart D Armstrong, Jones Benjamin, Eleanor G Bantley, Anu Chawla, Jordan Clark, Angela Connell, Richard Eccles, Isabel Garcia-Dorval, Matthew Gianni, Alessandro Gerada, PFC Gilmore, Richard Gregory, Xinying Han, Catherine Hanley, Margaret Hughes, Megan Turris-Gomara, James Johnson, L Liu, Jennifer Marston, Charitable Nelson, Elaine O'Toole, Cassia Olatun, Rebekah Perce-Flanigan, Lucile Hanlon, NP Rendell, Terry Ian Robinson, Paul Sharma, Ghada T Shavli, James P Stewart, Neil Swainson, Ecaterina Varos, Joanne Wains, Mark Whitehead |

|                                                                                                                                                                                                                                                                                                                                                                                |                                                                                                                                                                                                              |                                          |                                                                                                                                                                                                                                                                                                                                                                                                                                                         |
|--------------------------------------------------------------------------------------------------------------------------------------------------------------------------------------------------------------------------------------------------------------------------------------------------------------------------------------------------------------------------------|--------------------------------------------------------------------------------------------------------------------------------------------------------------------------------------------------------------|------------------------------------------|---------------------------------------------------------------------------------------------------------------------------------------------------------------------------------------------------------------------------------------------------------------------------------------------------------------------------------------------------------------------------------------------------------------------------------------------------------|
| EPI_ISL_572838                                                                                                                                                                                                                                                                                                                                                                 | University College London, Great Ormond Street Hospital for Children NHS Foundation Trust, Imperial College Healthcare NHS Trust                                                                             | COVID-19 Genomics UK (COG-UK) Consortium | Charlotte Nelson, Elaine O'Toole, Cassie Olatiju, Rebekah Perntze-Randl, Lucile Rankow, N.P Randle, Trevor Ian Robinson, Parul Sharma, Ghada T Shawil, James P Stewart, Neil Swainson, Eaterina Varnos, Joann Wats, Mark Whitehead                                                                                                                                                                                                                      |
| EPI_ISL_572846                                                                                                                                                                                                                                                                                                                                                                 | Oxford Viromics, NDM, University of Oxford, Oxford University Hospitals, Basingstoke and North Hampshire Hospital                                                                                            | COVID-19 Genomics UK (COG-UK) Consortium | Tanya Goldzchik, David Bonisali, George MacIntyre, Amy Trebes, Mariateresa de Cesare, Cairn Moore, Alex Mobbs, Anita Justice, Robert Shaw, Monique Andersson, Timothy Peio, Emma Wise, Nathan Moore, Jessica Lynch, Nick Cortes, Matilde Mori, Stephen Kidd, David Buck, John Todd, Christophe Fraser                                                                                                                                                   |
| EPI_ISL_572946                                                                                                                                                                                                                                                                                                                                                                 | Virology Department, Sheffield Teaching Hospitals NHS Foundation Trust, Department of Infection, Immunity and Cardiovascular Disease, The Medical School, University of Sheffield                            | COVID-19 Genomics UK (COG-UK) Consortium | Thushan de Silva, Matthew Parker, Nikki Smith, Adri Angyal, Rebecca Brown, Luke Green, Rachel Tucker, Paul Parsons, Daniela Groves, Katie Johnson, Laura Carrilero, Alex Keesley, Dave Partridge, Matthew Wyles, Benjamin Lindsey, Mehmet Yavuz, Mohammad Raza, Carad Evans                                                                                                                                                                             |
| EPI_ISL_573085, EPI_ISL_573086, EPI_ISL_573087, EPI_ISL_573089, EPI_ISL_573092, EPI_ISL_573093, EPI_ISL_573094, EPI_ISL_573097, EPI_ISL_573105, EPI_ISL_573106, EPI_ISL_573110, EPI_ISL_573111, EPI_ISL_573117                                                                                                                                                                 | see above<br>Quadrant Institute Bioscience                                                                                                                                                                   | COVID-19 Genomics UK (COG-UK) Consortium | Tanya Goldzchik, David Bonisali, George MacIntyre, Amy Trebes, Mariateresa de Cesare, Cairn Moore, Alex Mobbs, Anita Justice, Robert Shaw, Monique Andersson, Timothy Peio, Emma Wise, Nathan Moore, Jessica Lynch, Nick Cortes, Matilde Mori, Stephen Kidd, David Buck, John Todd, Christophe Fraser                                                                                                                                                   |
| EPI_ISL_573154, EPI_ISL_573162, EPI_ISL_573163, EPI_ISL_573164, EPI_ISL_573166, EPI_ISL_573172, EPI_ISL_573175, EPI_ISL_573177, EPI_ISL_573179, EPI_ISL_573190, EPI_ISL_573193, EPI_ISL_573195, EPI_ISL_573198, EPI_ISL_573201, EPI_ISL_573202, EPI_ISL_573203, EPI_ISL_573221, EPI_ISL_573225                                                                                 | EPI_ISL_573153<br>Department of Pathology, University of Cambridge                                                                                                                                           | COVID-19 Genomics UK (COG-UK) Consortium | Aminu S. Jahun, Yasmin Chaudry, Grant Hall, Ilana Georgana, Myra Hosnillo, Martin D. Curran, Malee Pinckert, Surendra Parmar, Ian Goodfellow                                                                                                                                                                                                                                                                                                            |
| EPI_ISL_573233                                                                                                                                                                                                                                                                                                                                                                 | see above                                                                                                                                                                                                    | COVID-19 Genomics UK (COG-UK) Consortium | Tanya Goldzchik, David Bonisali, George MacIntyre, Amy Trebes, Mariateresa de Cesare, Cairn Moore, Alex Mobbs, Anita Justice, Robert Shaw, Monique Andersson, Timothy Peio, Emma Wise, Nathan Moore, Jessica Lynch, Nick Cortes, Matilde Mori, Stephen Kidd, David Buck, John Todd, Christophe Fraser                                                                                                                                                   |
| EPI_ISL_573254, EPI_ISL_573256, EPI_ISL_573258, EPI_ISL_573259, EPI_ISL_573265                                                                                                                                                                                                                                                                                                 | see above<br>Oxford Viromics, NDM, University of Oxford, Oxford University Hospitals, Basingstoke and North Hampshire Hospital                                                                               | COVID-19 Genomics UK (COG-UK) Consortium | Angela Beckett, Yann Bougouis, Garry Searlett, Sharon Glaysher, Scott Elliott, Kelly Bicknell, Robert Impey, Allyson Lloyd, Sarah Wylie, Ethan Butcher, Anoop Chhabra, Samuel Robson                                                                                                                                                                                                                                                                    |
| EPI_ISL_573266, EPI_ISL_573267, EPI_ISL_573275, EPI_ISL_573280, EPI_ISL_573286, EPI_ISL_573288, EPI_ISL_573293, EPI_ISL_573308, EPI_ISL_573310, EPI_ISL_573314, EPI_ISL_573317, EPI_ISL_573318, EPI_ISL_573319, EPI_ISL_573321, EPI_ISL_573322, EPI_ISL_573378, EPI_ISL_573380, EPI_ISL_573390                                                                                 | see above<br>Northumbria University / South Tees Hospitals NHS Foundation Trust / North Tees and Hartlepool NHS Foundation Trust / Newcastle Hospitals NHS Foundation Trust<br>Quadrant Institute Bioscience | COVID-19 Genomics UK (COG-UK) Consortium | Dave J. Baker, Gemma L. Kay, Alp Aydin, Thanh Le-Viet, Steven Rudder, Ara P. Tedim, Anastasia Kolyva, Maria Diaz, Leonardo de Oliveira Martins, Nabil-Fareed Alkhran, Lizzie Meadows, Rachael Stanley, Ngizo Eunogo, Muhammed Yasar, Nicholas M. Thomson, Alexander J. Trotter, Rachel Gilroy, Samuel Bloomfield, Claire Stuart, Andrew Bell, Reeresh Prakash, Samir Duvsevic, Alison E. Mather, John Wann, Mark Webber, Andrew J. Page, Justin O'Grady |
| EPI_ISL_573415, EPI_ISL_573416                                                                                                                                                                                                                                                                                                                                                 | see above<br>Northumbria University / South Tees Hospitals NHS Foundation Trust / North Tees and Hartlepool NHS Foundation Trust / Newcastle Hospitals NHS Foundation Trust<br>Quadrant Institute Bioscience | COVID-19 Genomics UK (COG-UK) Consortium | Gemma Clark, Wendy Smith, Manjinder Kriakh, Vicki M Fleming, Michaele M Lisler, Hannah Howson-Wellis, Jonathan Ball, Patrick McCuire, Joseph Chappell, Theodoranis Tsolouridis, Nadine Holmes, Matthew Carlisle, Christopher Moore, Fel Sang, Johnny Debele, Victoria Wright, Matthew Loose                                                                                                                                                             |
| EPI_ISL_573426, EPI_ISL_573433, EPI_ISL_573469, EPI_ISL_573473, EPI_ISL_573477, EPI_ISL_573492                                                                                                                                                                                                                                                                                 | Queens Medical Centre, Clinical Microbiology Department / DeepSeq Nidringham                                                                                                                                 | COVID-19 Genomics UK (COG-UK) Consortium | Sergi Castellano, Rachel Williams, Mark Kristiansen, Paola Resende Silva, Sumando Roy, Tony Brooks, Helena Tullii, Paola Nola, Patricia Dyal, Charlotte Williams, Leyssa Forrest, Yasmin Panchbhaya, Jacqueline Findlay, Samuel Wyles, Julianne Brown, Kathryn Harris, Paul Handell, James Price, Alison Holmes, Judith Brewer                                                                                                                          |
| EPI_ISL_573529, EPI_ISL_573530, EPI_ISL_573533, EPI_ISL_573538, EPI_ISL_573541, EPI_ISL_573543, EPI_ISL_573546, EPI_ISL_573550, EPI_ISL_573551, EPI_ISL_573564                                                                                                                                                                                                                 | University College London, Great Ormond Street Hospital for Children NHS Foundation Trust, Imperial College Healthcare NHS Trust                                                                             | COVID-19 Genomics UK (COG-UK) Consortium | Thushan de Silva, Matthew Parker, Nikki Smith, Adri Angyal, Rebecca Brown, Luke Green, Rachel Tucker, Paul Parsons, Daniela Groves, Katie Johnson, Laura Carrilero, Alex Keesley, Dave Partridge, Matthew Wyles, Benjamin Lindsey, Mehmet Yavuz, Mohammad Raza, Carad Evans                                                                                                                                                                             |
| EPI_ISL_573570, EPI_ISL_573571, EPI_ISL_573574, EPI_ISL_573600, EPI_ISL_573606, EPI_ISL_573607, EPI_ISL_573617, EPI_ISL_573635, EPI_ISL_573638, EPI_ISL_573639, EPI_ISL_573641, EPI_ISL_573642, EPI_ISL_573651                                                                                                                                                                 | see above<br>Oxford Viromics, NDM, University of Oxford, Oxford University Hospitals, Basingstoke and North Hampshire Hospital                                                                               | COVID-19 Genomics UK (COG-UK) Consortium | Tanya Goldzchik, David Bonisali, George MacIntyre, Amy Trebes, Mariateresa de Cesare, Cairn Moore, Alex Mobbs, Anita Justice, Robert Shaw, Monique Andersson, Timothy Peio, Emma Wise, Nathan Moore, Jessica Lynch, Nick Cortes, Matilde Mori, Stephen Kidd, David Buck, John Todd, Christophe Fraser                                                                                                                                                   |
| EPI_ISL_573654, EPI_ISL_573673, EPI_ISL_573679                                                                                                                                                                                                                                                                                                                                 | University College London, Great Ormond Street Hospital for Children NHS Foundation Trust, Imperial College Healthcare NHS Trust                                                                             | COVID-19 Genomics UK (COG-UK) Consortium | Sergi Castellano, Rachel Williams, Mark Kristiansen, Paola Resende Silva, Sumando Roy, Tony Brooks, Helena Tullii, Paola Nola, Patricia Dyal, Charlotte Williams, Leyssa Forrest, Yasmin Panchbhaya, Jacqueline Findlay, Samuel Wyles, Julianne Brown, Kathryn Harris, Paul Handell, James Price, Alison Holmes, Judith Brewer                                                                                                                          |
| EPI_ISL_573687, EPI_ISL_573689, EPI_ISL_573691, EPI_ISL_573698, EPI_ISL_573703, EPI_ISL_573706, EPI_ISL_573707, EPI_ISL_573717, EPI_ISL_573718, EPI_ISL_573720, EPI_ISL_573722, EPI_ISL_573723, EPI_ISL_573727, EPI_ISL_573728, EPI_ISL_573729, EPI_ISL_573734, EPI_ISL_573735, EPI_ISL_573737, EPI_ISL_573740, EPI_ISL_573741, EPI_ISL_573749, EPI_ISL_573752, EPI_ISL_573757 | see above<br>Virology Department, Sheffield Teaching Hospitals NHS Foundation Trust, Department of Infection, Immunity and Cardiovascular Disease, The Medical School, University of Sheffield               | COVID-19 Genomics UK (COG-UK) Consortium | Thushan de Silva, Matthew Parker, Nikki Smith, Adri Angyal, Rebecca Brown, Luke Green, Rachel Tucker, Paul Parsons, Daniela Groves, Katie Johnson, Laura Carrilero, Alex Keesley, Dave Partridge, Matthew Wyles, Benjamin Lindsey, Mehmet Yavuz, Mohammad Raza, Carad Evans                                                                                                                                                                             |
| EPI_ISL_573760, EPI_ISL_573761                                                                                                                                                                                                                                                                                                                                                 | Northumbria University / South Tees Hospitals NHS Foundation Trust / North Tees and Hartlepool NHS Foundation Trust / Newcastle Hospitals NHS Foundation Trust                                               | COVID-19 Genomics UK (COG-UK) Consortium | Darren L. Smith, Andrew Nelson, Matthew Bashion, Greg R Young, Joshua Lon, John Allen, Mohammad A Tariq, Giles S Holt, Gary Black, Wen C Yew, Lynn Dover, Paul Baker, Steve Liggott, Sarah Essex, Jane Greenaway, Debra Padgett, Clive Graham, Garren Scott, Edward Barton, Emma Swindells, Brendan Payne, Jennifer Collins, Yviri Taha, Gary Ellingham                                                                                                 |
| EPI_ISL_573768                                                                                                                                                                                                                                                                                                                                                                 | West of Scotland Specialist Virology Centre, NHS-GGCG / MRC-University of Glasgow Centre for Virus Research                                                                                                  | COVID-19 Genomics UK (COG-UK) Consortium | Ana da Silva Filipe, Natasha Johnson, Kathy Smollett, Daniel Mair, Stephen Carmichael, Lily Tong, Janna Nichols, Elinu Arandy-Cortes, Kyriaki Ntomkou, Sarah McDonald, Marc Nebel, Palawee Asampanjan, Richard Oron, Joseph Hughes, Steven Vattipally, David L. Robertson, Asadar MacLellan, Rory Gunson, Kathy Li, Igor Starinski, Natalia Kras, James Shephard, Rajiv Shah, James Shephard, Antonio Ho, Emma Thomson                                  |
| EPI_ISL_573789                                                                                                                                                                                                                                                                                                                                                                 | Lighthouse Lab in Glasgow / MRC-University of Glasgow Centre for Virus Research                                                                                                                              | COVID-19 Genomics UK (COG-UK) Consortium | Ana da Silva Filipe, Natasha Johnson, Kathy Smollett, Daniel Mair, Stephen Carmichael, Lily Tong, Janna Nichols, Elinu Arandy-Cortes, Kyriaki Ntomkou, Sarah McDonald, Marc Nebel, Palawee Asampanjan, Richard Oron, Joseph Hughes, Steven Vattipally, David L. Robertson, Asadar MacLellan, Rory Gunson, Kathy Li, Igor Starinski, Natalia Kras, James Shephard, Rajiv Shah, James Shephard, Antonio Ho, Emma Thomson                                  |
| EPI_ISL_573770, EPI_ISL_573771, EPI_ISL_573772, EPI_ISL_573774, EPI_ISL_573775, EPI_ISL_573777, EPI_ISL_573778, EPI_ISL_573780, EPI_ISL_573782, EPI_ISL_573784, EPI_ISL_573786, EPI_ISL_573788, EPI_ISL_573792, EPI_ISL_573793                                                                                                                                                 | see above<br>West of Scotland Specialist Virology Centre, NHS-GGCG /                                                                                                                                         | COVID-19 Genomics UK (COG-UK) Consortium | Ana da Silva Filipe, Natasha Johnson, Kathy Smollett, Daniel Mair, Stephen Carmichael, Lily Tong, Janna Nichols, Elinu Arandy-Cortes, Kyriaki Ntomkou, Sarah McDonald, Marc Nebel, Palawee Asampanjan, Richard Oron, Joseph Hughes, Steven Vattipally, David L. Robertson, Asadar MacLellan, Rory Gunson, Kathy Li, Igor Starinski, Natalia Kras, James Shephard, Rajiv Shah, James Shephard, Antonio Ho, Emma Thomson                                  |





|                                                                                                                                                                                                                                                                                                                                                                                                                                                                                                                                                                                                                                                                                                                                                                                                                                                                                                                                                                |                                                                                                                                                                                                                     |                                                       |                                                                                                                                                                                                                                                                                                                                                                                                                                                                                                                                                                                                                                                                                           |
|----------------------------------------------------------------------------------------------------------------------------------------------------------------------------------------------------------------------------------------------------------------------------------------------------------------------------------------------------------------------------------------------------------------------------------------------------------------------------------------------------------------------------------------------------------------------------------------------------------------------------------------------------------------------------------------------------------------------------------------------------------------------------------------------------------------------------------------------------------------------------------------------------------------------------------------------------------------|---------------------------------------------------------------------------------------------------------------------------------------------------------------------------------------------------------------------|-------------------------------------------------------|-------------------------------------------------------------------------------------------------------------------------------------------------------------------------------------------------------------------------------------------------------------------------------------------------------------------------------------------------------------------------------------------------------------------------------------------------------------------------------------------------------------------------------------------------------------------------------------------------------------------------------------------------------------------------------------------|
| EPI_ISL_576915, EPI_ISL_576916, EPI_ISL_576917, EPI_ISL_576918                                                                                                                                                                                                                                                                                                                                                                                                                                                                                                                                                                                                                                                                                                                                                                                                                                                                                                 | Department of Pathology, University of Cambridge                                                                                                                                                                    | COVID-19 Genomics UK (COG-UK) Consortium              | Ammu S. Jabun, Yasmin Chaudhry, Grant Hall, Iliana Georgiana, Myra Hosnilo, Martin D. Curran, Maite Pinckert, Suerendra Parmar, Ian Goodfellow                                                                                                                                                                                                                                                                                                                                                                                                                                                                                                                                            |
| EPI_ISL_576920, EPI_ISL_576931, EPI_ISL_576935, EPI_ISL_576937, EPI_ISL_576941, EPI_ISL_576942, EPI_ISL_576954, EPI_ISL_576956                                                                                                                                                                                                                                                                                                                                                                                                                                                                                                                                                                                                                                                                                                                                                                                                                                 | Oxford Viromics, NDM, University of Oxford, Oxford University Hospitals, Basingstoke and North Hampshire Hospital                                                                                                   | COVID-19 Genomics UK (COG-UK) Consortium              | Tanya Goldschik, David Bonasall, George MacIntyre, Amy Trebes, Mariateresa de Cesare, Cairn Moore, Alex Mobbs, Anita Justice, Robert Shaw, Monique Andersson, Timothy Peło, Emma Wise, Nathan Moore, Jessica Lynch, Nick Cortes, Matilde Mori, Stephen Kidd, David Buck, John Todd, Christophe Fraser                                                                                                                                                                                                                                                                                                                                                                                     |
| EPI_ISL_576962, EPI_ISL_576963, EPI_ISL_576964, EPI_ISL_576965, EPI_ISL_576966, EPI_ISL_576967, EPI_ISL_576983                                                                                                                                                                                                                                                                                                                                                                                                                                                                                                                                                                                                                                                                                                                                                                                                                                                 | Liverpool Clinical Laboratories                                                                                                                                                                                     | COVID-19 Genomics UK (COG-UK) Consortium              | Sam Haldeney, Anita Lucaci, Steve Paterson, Julian Hiscox, Alistair Darity, M Almsaud, A Alrezaili, Muhammad Alruwaili, Stuart D Armstrong, Jones Benjamin, Eleanor G Bentley, Amr Charwia, Jordan Clark, Angela Cawell, Richard Eccles, Isabel Garcia-Dorival, Matthew Gemmill, Alessandro Gerada, PKR Gilmore, Richard Gregory, Ximeng Han, Catherine Hartley, Margaret Hughes, Mirron Iurriza-Gomara, James Johnson, L Liu, Jennifer Morrison, Charidie Nelson, Elaine O'Toole, Cassie Olatiju, Rebekah Perrett-Randall, Lucile Rainbow, NP Paradi, Trevor Ian Robinson, Parul Sharma, Ghada T Shawil, James P Stewart, Neil Swainston, Ecaterina Varnos, Joanne Walks, Mark Whithread |
| EPI_ISL_576997, EPI_ISL_576999, EPI_ISL_577000, EPI_ISL_577004, EPI_ISL_577014, EPI_ISL_577018, EPI_ISL_577026, EPI_ISL_577031, EPI_ISL_577035                                                                                                                                                                                                                                                                                                                                                                                                                                                                                                                                                                                                                                                                                                                                                                                                                 | Northumbria University / South Tees Hospitals NHS Foundation Trust / North Cumbria Integrated Care NHS Foundation Trust / North Tees and Hartlepool NHS Foundation Trust / Newcastle Hospitals NHS Foundation Trust | COVID-19 Genomics UK (COG-UK) Consortium              | Darren L Smith, Andrew Nelson, Matthew Bastion, Gagg R Young, Joshua Lon, John Allan, Mohammad A Tariq, Giles S Holt, Gary Black, Wen C Yew, Lynn Dover, Paul Baker, Steve Liggett, Sarah Essex, Jane Greenaway, Debra Padgett, Olive Graham, Garren Scott, Edward Barton, Emma Swindells, Brendan Payne, Jennifer Collins, Yusef Tara, Gary Eltringham                                                                                                                                                                                                                                                                                                                                   |
| EPI_ISL_577022, EPI_ISL_577092                                                                                                                                                                                                                                                                                                                                                                                                                                                                                                                                                                                                                                                                                                                                                                                                                                                                                                                                 | Centre for Enzyme Innovation, University of Portsmouth / Translational Research Laboratory, Portsmouth Hospitals                                                                                                    | COVID-19 Genomics UK (COG-UK) Consortium              | Angela Beckett, Yarn Bougeois, Gary Scarlett, Shaon Glynshter, Scott Elliott, Kelly Beckett, Robert Impey, Alyson Loyd, Sarah Wylie, Ethan Butcher, Anoop Chaturhan, Samuel Houson                                                                                                                                                                                                                                                                                                                                                                                                                                                                                                        |
| EPI_ISL_577106, EPI_ISL_577109                                                                                                                                                                                                                                                                                                                                                                                                                                                                                                                                                                                                                                                                                                                                                                                                                                                                                                                                 | Oxford Viromics, NDM, University of Oxford, Oxford University Hospitals, Basingstoke and North Hampshire Hospital                                                                                                   | COVID-19 Genomics UK (COG-UK) Consortium              | Tanya Goldschik, David Bonasall, George MacIntyre, Amy Trebes, Mariateresa de Cesare, Cairn Moore, Alex Mobbs, Anita Justice, Robert Shaw, Monique Andersson, Timothy Peło, Emma Wise, Nathan Moore, Jessica Lynch, Nick Cortes, Matilde Mori, Stephen Kidd, David Buck, John Todd, Christophe Fraser                                                                                                                                                                                                                                                                                                                                                                                     |
| EPI_ISL_577111, EPI_ISL_577123, EPI_ISL_577129, EPI_ISL_577137, EPI_ISL_577138, EPI_ISL_577144, EPI_ISL_577151, EPI_ISL_577152, EPI_ISL_577171, EPI_ISL_577176, EPI_ISL_577178, EPI_ISL_577189                                                                                                                                                                                                                                                                                                                                                                                                                                                                                                                                                                                                                                                                                                                                                                 | Centre for Enzyme Innovation, University of Portsmouth / Translational Research Laboratory, Portsmouth Hospitals                                                                                                    | COVID-19 Genomics UK (COG-UK) Consortium              | Angela Beckett, Yarn Bougeois, Gary Scarlett, Shaon Glynshter, Scott Elliott, Kelly Beckett, Robert Impey, Alyson Loyd, Sarah Wylie, Ethan Butcher, Anoop Chaturhan, Samuel Houson                                                                                                                                                                                                                                                                                                                                                                                                                                                                                                        |
| EPI_ISL_577230, EPI_ISL_577237, EPI_ISL_577248, EPI_ISL_577251, EPI_ISL_577253, EPI_ISL_577261, EPI_ISL_577283, EPI_ISL_577281                                                                                                                                                                                                                                                                                                                                                                                                                                                                                                                                                                                                                                                                                                                                                                                                                                 | Queens Medical Centre, Clinical Microbiology Department / DeepSeq Nottingham                                                                                                                                        | COVID-19 Genomics UK (COG-UK) Consortium              | Gemma Clark, Wendy Smith, Manjinder Khakh, Vicki M Fleming, Michelle M Lister, Hannah Howson-Wells, Jonathan Ball, Patrick McCuire, Joseph Chappell, Theodoras Tsolieridis, Nadine Holmes, Matthew Carlisle, Christopher Moore, Fai Sang, Johnny Debebe, Victoria Wright, Matthew Loose                                                                                                                                                                                                                                                                                                                                                                                                   |
| EPI_ISL_577299, EPI_ISL_577300, EPI_ISL_577302, EPI_ISL_577303, EPI_ISL_577306, EPI_ISL_577311, EPI_ISL_577312, EPI_ISL_577314, EPI_ISL_577315, EPI_ISL_577316, EPI_ISL_577324, EPI_ISL_577325, EPI_ISL_577326, EPI_ISL_577328, EPI_ISL_577335, EPI_ISL_577337, EPI_ISL_577339, EPI_ISL_577342                                                                                                                                                                                                                                                                                                                                                                                                                                                                                                                                                                                                                                                                 | Centre for Enzyme Innovation, University of Portsmouth / Translational Research Laboratory, Portsmouth Hospitals                                                                                                    | COVID-19 Genomics UK (COG-UK) Consortium              | Mchugh M, Dewar R, Rooke S, Gallagher M, Balcaza C, O'Toole A, Schae E, Hill V, McCrone JT, Colquhoun R, Yu X, Jackson B, Rambaut A, Williams TC, Templeton K                                                                                                                                                                                                                                                                                                                                                                                                                                                                                                                             |
| EPI_ISL_577349, EPI_ISL_577354, EPI_ISL_577355, EPI_ISL_577358                                                                                                                                                                                                                                                                                                                                                                                                                                                                                                                                                                                                                                                                                                                                                                                                                                                                                                 | Viology Department, Royal Infirmary of Edinburgh, NHS Lothian / School of Biological Sciences, University of Edinburgh / Institute of Genetics and Molecular Medicine, University of Edinburgh                      | COVID-19 Genomics UK (COG-UK) Consortium              | Bert Temperton, Aaron Jeffries, Michelle Michelsen, Joanna Warwick-Duggdale, Audrey Farbos, Robyn Manley, Stephen Michell, Jane Masoli                                                                                                                                                                                                                                                                                                                                                                                                                                                                                                                                                    |
| EPI_ISL_577359, EPI_ISL_577360, EPI_ISL_577361, EPI_ISL_577365, EPI_ISL_577366, EPI_ISL_577367, EPI_ISL_577368, EPI_ISL_577373, EPI_ISL_577377, EPI_ISL_577378                                                                                                                                                                                                                                                                                                                                                                                                                                                                                                                                                                                                                                                                                                                                                                                                 | University of Exeter                                                                                                                                                                                                | COVID-19 Genomics UK (COG-UK) Consortium              | Ben Temperton, Aaron Jeffries, Michelle Michelsen, Joanna Warwick-Duggdale, Audrey Farbos, Robyn Manley, Stephen Michell, Jane Masoli                                                                                                                                                                                                                                                                                                                                                                                                                                                                                                                                                     |
| EPI_ISL_577385, EPI_ISL_577386, EPI_ISL_577392, EPI_ISL_577393, EPI_ISL_577394                                                                                                                                                                                                                                                                                                                                                                                                                                                                                                                                                                                                                                                                                                                                                                                                                                                                                 | Centre for Enzyme Innovation, University of Portsmouth / Translational Research Laboratory, Portsmouth Hospitals                                                                                                    | COVID-19 Genomics UK (COG-UK) Consortium              | Angela Beckett, Yarn Bougeois, Gary Scarlett, Shaon Glynshter, Scott Elliott, Kelly Beckett, Robert Impey, Alyson Loyd, Sarah Wylie, Ethan Butcher, Anoop Chaturhan, Samuel Houson                                                                                                                                                                                                                                                                                                                                                                                                                                                                                                        |
| EPI_ISL_577403, EPI_ISL_577407, EPI_ISL_577408, EPI_ISL_577411, EPI_ISL_577412, EPI_ISL_577413, EPI_ISL_577414, EPI_ISL_577415                                                                                                                                                                                                                                                                                                                                                                                                                                                                                                                                                                                                                                                                                                                                                                                                                                 | Oxford Viromics, NDM, University of Oxford, Oxford University Hospitals, Basingstoke and North Hampshire Hospital                                                                                                   | COVID-19 Genomics UK (COG-UK) Consortium              | Tanya Goldschik, David Bonasall, George MacIntyre, Amy Trebes, Mariateresa de Cesare, Cairn Moore, Alex Mobbs, Anita Justice, Robert Shaw, Monique Andersson, Timothy Peło, Emma Wise, Nathan Moore, Jessica Lynch, Nick Cortes, Matilde Mori, Stephen Kidd, David Buck, John Todd, Christophe Fraser                                                                                                                                                                                                                                                                                                                                                                                     |
| EPI_ISL_577418, EPI_ISL_577420, EPI_ISL_577423, EPI_ISL_577424, EPI_ISL_577427, EPI_ISL_577430, EPI_ISL_577434, EPI_ISL_577435, EPI_ISL_577436, EPI_ISL_577442, EPI_ISL_577443, EPI_ISL_577444, EPI_ISL_577447, EPI_ISL_577448, EPI_ISL_577450, EPI_ISL_577451, EPI_ISL_577452, EPI_ISL_577453, EPI_ISL_577455, EPI_ISL_577456, EPI_ISL_577458, EPI_ISL_577459, EPI_ISL_577461, EPI_ISL_577469, EPI_ISL_577470, EPI_ISL_577471, EPI_ISL_577472, EPI_ISL_577475, EPI_ISL_577480, EPI_ISL_577481, EPI_ISL_577482, EPI_ISL_577483, EPI_ISL_577485, EPI_ISL_577486, EPI_ISL_577488, EPI_ISL_577489, EPI_ISL_577490, EPI_ISL_577493, EPI_ISL_577502, EPI_ISL_577503, EPI_ISL_577506, EPI_ISL_577512, EPI_ISL_577515, EPI_ISL_577517, EPI_ISL_577520, EPI_ISL_577521, EPI_ISL_577522, EPI_ISL_577524, EPI_ISL_577524, EPI_ISL_577524, EPI_ISL_577527, EPI_ISL_577529, EPI_ISL_577530, EPI_ISL_577531, EPI_ISL_577532, EPI_ISL_577533, EPI_ISL_577540, EPI_ISL_577542 | Wales Specialist Virology Centre Sequencing lab: Pathogen Genomics Unit                                                                                                                                             | COVID-19 Genomics UK (COG-UK) Consortium              | Catherine Moore, Johnathan Evans, Laura Gifford, Malorie Parry, Simon Cottrell, Angela Marchbank, Alec Birchley, Alexander Adams, Amy Gaskin, Bree Gatica-Wilcox, Jason Coombes, Joel Southgate, Lauren Gilbert, Lee Graham, Nicole Pasochiani, Sara Kunzinger-Summerhayes, Sarah Taylor, Sophie Jones, Sara Ray, Matthew Bull, James Walkins, Sally Cordean, Tom Connor                                                                                                                                                                                                                                                                                                                  |
| EPI_ISL_577829, EPI_ISL_577830, EPI_ISL_577831, EPI_ISL_577832, EPI_ISL_577834, EPI_ISL_577835, EPI_ISL_577887, EPI_ISL_577889, EPI_ISL_577899, EPI_ISL_577902, EPI_ISL_577905, EPI_ISL_577926, EPI_ISL_577929, EPI_ISL_577931, EPI_ISL_577931, EPI_ISL_577935, EPI_ISL_577967, EPI_ISL_577974, EPI_ISL_577981, EPI_ISL_577982, EPI_ISL_578001, EPI_ISL_578002, EPI_ISL_578004, EPI_ISL_578009, EPI_ISL_578010, EPI_ISL_578011, EPI_ISL_578015, EPI_ISL_578027, EPI_ISL_578029, EPI_ISL_578034, EPI_ISL_578038, EPI_ISL_578041, EPI_ISL_578049, EPI_ISL_578053, EPI_ISL_578055, EPI_ISL_578059, EPI_ISL_578061, EPI_ISL_578073                                                                                                                                                                                                                                                                                                                                 | Dutch COVID-19 response team                                                                                                                                                                                        | COVID-19 Genomics UK (COG-UK) Consortium              | Bas Oude Munnink, Reina Sikkema, David Nieuwenhuijse, Irina Chastakova, Anne van der Linden, Marjan Boter, Emmanuelle Munger, Corine GeurtsvanKessel, Annemiek van der Eijk, Richard Meekamp, Marion Kopmans, on behalf of the Dutch national COVID-19 response team.                                                                                                                                                                                                                                                                                                                                                                                                                     |
| EPI_ISL_578202, EPI_ISL_578214, EPI_ISL_578219, EPI_ISL_578220, EPI_ISL_578298, EPI_ISL_578299, EPI_ISL_578320                                                                                                                                                                                                                                                                                                                                                                                                                                                                                                                                                                                                                                                                                                                                                                                                                                                 | National Virus Reference Laboratory                                                                                                                                                                                 | National Virus Reference Laboratory                   | Michael Carr, Gabriel Gonzalez, Jonathan Dean, Suzie Coughlan, Cillian F De Gascon                                                                                                                                                                                                                                                                                                                                                                                                                                                                                                                                                                                                        |
| EPI_ISL_579109                                                                                                                                                                                                                                                                                                                                                                                                                                                                                                                                                                                                                                                                                                                                                                                                                                                                                                                                                 | LabPLUS                                                                                                                                                                                                             | Institute of Environmental Science and Research (ESR) | Karjoun Ren, Matt Storey, Nikki Freed, Muhammad Faisal, Jing Wang, Hernes Perez, Anja Werner, Antje van der Linden, Atjo Lijon, Chris Mansell, David Hermer, Dragana Drnekovic, Gary McAuliffe, Hana Sofia Anderson, James Usher, Jill Sherwood, Julia Howard, Juliet Ely, Mary D'Almeida, Matt Bakston, Matthew Rogers, Max Bourneild, Michael Addie, Michelle Bain, Sally Roberts, Sarah Jeffries, Shaheen Mukhtar, Susan Mopani, Susant Tayor, Timothy Blackmore, Vani Sathyanarayanan, Veronica Fagley, Virginia Hope, Erasmus Smit, Lauren Vicky, Othi Shander, Jooep de Ligt                                                                                                        |



|                                                                                                                                |                                |                                 |                                                                            |                                                                                                                                                                                                                                                                                                               |
|--------------------------------------------------------------------------------------------------------------------------------|--------------------------------|---------------------------------|----------------------------------------------------------------------------|---------------------------------------------------------------------------------------------------------------------------------------------------------------------------------------------------------------------------------------------------------------------------------------------------------------|
| EPI_ISL_580519, EPI_ISL_580526, EPI_ISL_580529, EPI_ISL_580530                                                                 | EPI_ISL_580536                 | Lighthouse Lab in Cambridge     | (COG-UK) consortium                                                        | Jackson, Ian Johnston, Dominic Kwiatkowski, Cordelia Langford, John Sillitoe on behalf of the Wellcome Sanger Institute COVID-19 Surveillance Team                                                                                                                                                            |
| EPI_ISL_580539, EPI_ISL_580540, EPI_ISL_580546, EPI_ISL_580547                                                                 | EPI_ISL_580550                 | Lighthouse Lab in Adenley Park  | Wellcome Sanger Institute for the COVID-19 Genomics UK (COG-UK) consortium | Rob Howes, The Lighthouse Lab in Cambridge and Alex Alderton, Roberto Amato, Sonia Goncalves, Ewan Harrison, David K. Jackson, Ian Johnston, Dominic Kwiatkowski, Cordelia Langford, John Sillitoe on behalf of the Wellcome Sanger Institute COVID-19 Surveillance Team                                      |
| EPI_ISL_580561, EPI_ISL_580566, EPI_ISL_580568, EPI_ISL_580572                                                                 | EPI_ISL_580576                 | Lighthouse Lab in Cambridge     | Wellcome Sanger Institute for the COVID-19 Genomics UK (COG-UK) consortium | Jacquelyn Wynn, Mairead Hyland, The Lighthouse Lab in Adenley Park and Alex Alderton, Roberto Amato, Sonia Goncalves, Ewan Harrison, David K. Jackson, Ian Johnston, Dominic Kwiatkowski, Cordelia Langford, John Sillitoe on behalf of the Wellcome Sanger Institute COVID-19 Surveillance Team              |
| EPI_ISL_580578                                                                                                                 | EPI_ISL_580579                 | Lighthouse Lab in Adenley Park  | Wellcome Sanger Institute for the COVID-19 Genomics UK (COG-UK) consortium | Rob Howes, The Lighthouse Lab in Cambridge and Alex Alderton, Roberto Amato, Sonia Goncalves, Ewan Harrison, David K. Jackson, Ian Johnston, Dominic Kwiatkowski, Cordelia Langford, John Sillitoe on behalf of the Wellcome Sanger Institute COVID-19 Surveillance Team                                      |
| EPI_ISL_580586                                                                                                                 | EPI_ISL_580586                 | Lighthouse Lab in Cambridge     | Wellcome Sanger Institute for the COVID-19 Genomics UK (COG-UK) consortium | Jacquelyn Wynn, Mairead Hyland, The Lighthouse Lab in Adenley Park and Alex Alderton, Roberto Amato, Sonia Goncalves, Ewan Harrison, David K. Jackson, Ian Johnston, Dominic Kwiatkowski, Cordelia Langford, John Sillitoe on behalf of the Wellcome Sanger Institute COVID-19 Surveillance Team              |
| EPI_ISL_580589                                                                                                                 | EPI_ISL_580594                 | Lighthouse Lab in Adenley Park  | Wellcome Sanger Institute for the COVID-19 Genomics UK (COG-UK) consortium | Rob Howes, The Lighthouse Lab in Cambridge and Alex Alderton, Roberto Amato, Sonia Goncalves, Ewan Harrison, David K. Jackson, Ian Johnston, Dominic Kwiatkowski, Cordelia Langford, John Sillitoe on behalf of the Wellcome Sanger Institute COVID-19 Surveillance Team                                      |
| EPI_ISL_580639, EPI_ISL_580601, EPI_ISL_580611, EPI_ISL_580613, EPI_ISL_580623, EPI_ISL_580624                                 | EPI_ISL_580628                 | Lighthouse Lab in Adenley Park  | Wellcome Sanger Institute for the COVID-19 Genomics UK (COG-UK) consortium | Jacquelyn Wynn, Mairead Hyland, The Lighthouse Lab in Adenley Park and Alex Alderton, Roberto Amato, Sonia Goncalves, Ewan Harrison, David K. Jackson, Ian Johnston, Dominic Kwiatkowski, Cordelia Langford, John Sillitoe on behalf of the Wellcome Sanger Institute COVID-19 Surveillance Team              |
| EPI_ISL_580639, EPI_ISL_580666, EPI_ISL_580677                                                                                 | EPI_ISL_580682                 | Lighthouse Lab in Cambridge     | Wellcome Sanger Institute for the COVID-19 Genomics UK (COG-UK) consortium | Rob Howes, The Lighthouse Lab in Cambridge and Alex Alderton, Roberto Amato, Sonia Goncalves, Ewan Harrison, David K. Jackson, Ian Johnston, Dominic Kwiatkowski, Cordelia Langford, John Sillitoe on behalf of the Wellcome Sanger Institute COVID-19 Surveillance Team                                      |
| EPI_ISL_580683, EPI_ISL_580684                                                                                                 | EPI_ISL_580687                 | Lighthouse Lab in Glasgow       | (COG-UK) consortium                                                        | Dominic Kwiatkowski, Cordelia Langford, John Sillitoe on behalf of the Wellcome Sanger Institute COVID-19 Surveillance Team                                                                                                                                                                                   |
| EPI_ISL_580696, EPI_ISL_580908                                                                                                 | EPI_ISL_580697, EPI_ISL_580902 | Lighthouse Lab in Glasgow       | Wellcome Sanger Institute for the COVID-19 Genomics UK (COG-UK) consortium | Harper VansSteenhouse, Yurni Kasai, David Gray, Carol Clugston, Anna Dominiczak and Alex Alderton, Roberto Amato, Sonia Goncalves, Ewan Harrison, David K. Jackson, Ian Johnston, Dominic Kwiatkowski, Cordelia Langford, John Sillitoe on behalf of the Wellcome Sanger Institute COVID-19 Surveillance Team |
| EPI_ISL_580921                                                                                                                 | EPI_ISL_580925                 | Lighthouse Lab in Milton Keynes | Wellcome Sanger Institute for the COVID-19 Genomics UK (COG-UK) consortium | The Lighthouse Lab in Milton Keynes and Alex Alderton, Roberto Amato, Sonia Goncalves, Ewan Harrison, David K. Jackson, Ian Johnston, Dominic Kwiatkowski, Cordelia Langford, John Sillitoe on behalf of the Wellcome Sanger Institute COVID-19 Surveillance Team                                             |
| EPI_ISL_580931                                                                                                                 | EPI_ISL_580935                 | Lighthouse Lab in Glasgow       | Wellcome Sanger Institute for the COVID-19 Genomics UK (COG-UK) consortium | Harper VansSteenhouse, Yurni Kasai, David Gray, Carol Clugston, Anna Dominiczak and Alex Alderton, Roberto Amato, Sonia Goncalves, Ewan Harrison, David K. Jackson, Ian Johnston, Dominic Kwiatkowski, Cordelia Langford, John Sillitoe on behalf of the Wellcome Sanger Institute COVID-19 Surveillance Team |
| EPI_ISL_580937, EPI_ISL_580939, EPI_ISL_580942, EPI_ISL_580944                                                                 | EPI_ISL_580951                 | Lighthouse Lab in Glasgow       | Wellcome Sanger Institute for the COVID-19 Genomics UK (COG-UK) consortium | The Lighthouse Lab in Milton Keynes and Alex Alderton, Roberto Amato, Sonia Goncalves, Ewan Harrison, David K. Jackson, Ian Johnston, Dominic Kwiatkowski, Cordelia Langford, John Sillitoe on behalf of the Wellcome Sanger Institute COVID-19 Surveillance Team                                             |
| EPI_ISL_580956, EPI_ISL_580960, EPI_ISL_580968, EPI_ISL_580970, EPI_ISL_580977                                                 | EPI_ISL_580979                 | Lighthouse Lab in Glasgow       | Wellcome Sanger Institute for the COVID-19 Genomics UK (COG-UK) consortium | The Lighthouse Lab in Milton Keynes and Alex Alderton, Roberto Amato, Sonia Goncalves, Ewan Harrison, David K. Jackson, Ian Johnston, Dominic Kwiatkowski, Cordelia Langford, John Sillitoe on behalf of the Wellcome Sanger Institute COVID-19 Surveillance Team                                             |
| EPI_ISL_580982, EPI_ISL_580986, EPI_ISL_580988, EPI_ISL_580999, EPI_ISL_581006, EPI_ISL_581020, EPI_ISL_581021, EPI_ISL_581037 | EPI_ISL_581038                 | Lighthouse Lab in Glasgow       | Wellcome Sanger Institute for the COVID-19 Genomics UK (COG-UK) consortium | The Lighthouse Lab in Milton Keynes and Alex Alderton, Roberto Amato, Sonia Goncalves, Ewan Harrison, David K. Jackson, Ian Johnston, Dominic Kwiatkowski, Cordelia Langford, John Sillitoe on behalf of the Wellcome Sanger Institute COVID-19 Surveillance Team                                             |
| EPI_ISL_581042                                                                                                                 | EPI_ISL_581042                 | Lighthouse Lab in Glasgow       | Wellcome Sanger Institute for the COVID-19 Genomics UK (COG-UK) consortium | The Lighthouse Lab in Milton Keynes and Alex Alderton, Roberto Amato, Sonia Goncalves, Ewan Harrison, David K. Jackson, Ian Johnston, Dominic Kwiatkowski, Cordelia Langford, John Sillitoe on behalf of the Wellcome Sanger Institute COVID-19 Surveillance Team                                             |

































EPI\_ISL\_603539, EPI\_ISL\_603541, EPI\_ISL\_603547, EPI\_ISL\_603552, EPI\_ISL\_603571, EPI\_ISL\_603572, EPI\_ISL\_603574, EPI\_ISL\_603575, EPI\_ISL\_603576, EPI\_ISL\_603580, EPI\_ISL\_603582, EPI\_ISL\_603589, EPI\_ISL\_603598, EPI\_ISL\_603603, EPI\_ISL\_603604, EPI\_ISL\_603607, EPI\_ISL\_603609, EPI\_ISL\_603610, EPI\_ISL\_603611, EPI\_ISL\_603615, EPI\_ISL\_603616, EPI\_ISL\_603619, EPI\_ISL\_603622, EPI\_ISL\_603627, EPI\_ISL\_603633, EPI\_ISL\_603638, EPI\_ISL\_603655, EPI\_ISL\_603657, EPI\_ISL\_603658, EPI\_ISL\_603662, EPI\_ISL\_603676, EPI\_ISL\_603677, EPI\_ISL\_603685, EPI\_ISL\_603688, EPI\_ISL\_603710, EPI\_ISL\_603713, EPI\_ISL\_603720, EPI\_ISL\_603721, EPI\_ISL\_603726, EPI\_ISL\_603737, EPI\_ISL\_603738

see above

Vollier AG

Department of Biosystems Science and Engineering, ETH  
Zürich

Christian Beisel, Sarah Nadeau, Ivan Topolitsky, Pedro Ferreira, Philipp Jablonski, Susana Posada-Céspedes, Tobias Schär, Ina Nissen, Natascha Santacroce, Evidie Burcklen, Christiane Beckmann, Maurice Redondo, Olivier Kobi, Christoph Noppen, Sophie Seidel, Noémie Santamaria de Souza, Niko Beerwinkler, Tanja Stadler
